# Supplementary material for: Clinical and molecular significance of the RNA m6A methyltransferase complex in prostate cancer
Source: Frontiers journal article supplement (doi:10.3389/fgene.2022.1096071), 2023-01-12
Supplement: Data_Sheet_2.zip [file Supplementary_table_1.xlsx]

## Sheet: Supplementary table 1
Supplementary Table 1. Summary of patient demographics and clinicopathological
parameters analysed in the Nottingham prostate TMA patient cohort
(pTNM= patient tumour, node, metastasis; PSA= prostate specific antigen).
Parameter			Number of patients
Age (years)	≤60		44
	≥61		60
Ethnicity	White		94
	Mixed/Black Carribean		2
	Any other		2
	N/A		6
Gleason score	3+3		12
	3+4		46
	4+3		22
	8 or 9		23
	N/A		1
pTNM	T1&T2		66
	T3		33
	N/A		5
Perineural invasion	No		32
	Yes		72
Positive surgical margins	No		55
	Yes		47
	N/A		2
Extraprostatic extension	No		66
	Yes		36
	N/A		2
Preoperative PSA levels (ng/ml)	≤10		55
	≥11		46
	N/A		3
Biochemical recurrence	No		59
	Yes		33
	Never tumour free		12
Time to biochemical recurrence (months)	≤23		15
	≥24		18
