# Supplementary material for: Clinical and molecular significance of the RNA m6A methyltransferase complex in prostate cancer
Source: Frontiers journal article supplement (doi:10.3389/fgene.2022.1096071), 2023-01-12
Supplement: Data_Sheet_2.zip [file Supplementary_table_2.xlsx]

## Sheet: Supplementary table 2
Supplementary Table 2. Summary of clinicopathological parameters correlated with METTL3, METTL14, CBLL1 and WTAP protein expression in the Nottingham prostate TMA patient cohort
(pTNM= patient tumour, node, metastasis; PSA= prostate specific antigen).
Clinicopathological parameter			METTL3 nuclear expression Frequency N (%)					METTL14 nuclear expression Frequency N (%)					CBLL1 nuclear expression Frequency N (%)					CBLL1 cytoplasmic expression Frequency N (%)					WTAP nuclear expression Frequency N (%)
			Low (≤115)	Med (116-155)	High (≥156)	p value (χ²)		Low (≤110)	Med (111-149)	High (≥150)	p value (χ²)		Low (≤89)	Med (90-100)	High (≥101)	p value (χ²)		Low (≤30)	Med (31-70)	High (≥71)	p value (χ²)		Low (≤100)	Med (101-129)	High (≥130)	p value (χ²)
Tissue Type	Non-malignant		11 (8.4%)	23 (17.6%)	5 (3.8%)	0.011 (9.09)		23 (20.9%)	25 (22.7%)	20 (18.2%)	0.095 (4.71)		14 (9.9%)	19 (13.4%)	10 (7.0%)	0.401 (1.830)		24 (16.9%)	14 (9.9%)	5 (3.5%)	0.066 (5.440)		20 (21.5%)	11 (11.8%)	10 (10.8%)	0.874 (0.27)
	Tumour		21 (16.0%)	35 (26.7%)	36 (27.5%)			10 (9.1%)	11 (10.0%)	21 (19.1%)			23 (16.2%)	44 (31.0%)	32 (22.5%)			37 (26.1%)	36 (25.4%)	26 (18.3%)			41 (44.1%)	28 (30.1%)	24 (25.8%)
Age (years)	≤60		12 (13.0%)	12 (13.0%)	12 (13.0%)	0.641 (0.890)		7 (10.3%)	4 (5.9%)	18 (26.5%)	0.282 (2.535)		10 (10.1%)	17 (17.2%)	14 (14.1%)	0.881 (0.252)		18 (18.0%)	14 (14.0%)	9 (9.0%)	0.565 (1.142)		17 (18.3%)	8 (8.6%)	12 (12.9%)	0.278 (2.563)
	≥61		17 (18.5%)	15 (16.3%)	24 (26.1%)			16 (23.5%)	6 (8.8%)	17 (25.0%)			13 (13.1%)	27 (27.3%)	18 (18.2%)			20 (20.0%)	22 (22.0%)	17 (17.0%)			24 (25.8%)	20 (21.5%)	12 (12.9%)
Primary Gleason grade	3		19 (20.7%)	12 (13.0%)	19 (20.7%)	0.609 (2.703)		13 (19.1%)	6 (8.8%)	18 (26.5%)	0.660 (2.415)		16 (16.2%)	21 (21.2%)	19 (19.2%)	0.435 (3.792)		26 (26.0%)	21 (21.0%)	10 (10.0%)	0.096 (7.886)		24 (25.8%)	16 (17.2%)	11 (11.8%)	0.888 (1.141)
	4		9 (9.8%)	14 (15.2%)	16 (17.4%)			9 (13.2%)	4 (5.9%)	17 (25.0%)			6 (6.1%)	22 (22.2%)	12 (12.1%)			11 (11.0%)	15 (15.0%)	14 (14.0%)			16 (17.2%)	11 (11.8%)	12 (12.9%)
	5		1 (1.1%)	1 (1.1%)	1 (1.1%)			1 (1.5%)	0 (0.0%)	0 (0.0%)			1 (1.0%)	1 (1.0%)	1 (1.0%)			1 (1.0%)	0 (0.0%)	2 (2.0%)			1 (1.8%)	1 (1.8%)	1 (1.8%)
Secondary Gleason grade	3		10 (10.9%)	9 (9.8%)	12 (13.0%)	1.000 (0.019)		9 (13.2%)	1 (1.5%)	11 (16.2%)	0.488 (3.436)		8 (8.1%)	12 (12.1%)	13 (13.1%)	0.427 (3.845)		13 (13.0%)	8 (8.0%)	12 (12.0%)	0.308 (4.802)		10 (10.8%)	6 (6.5%)	13 (14.0%)	0.086 (8.149)
	4		16 (17.4%)	15 (16.3%)	20 (21.7%)			11 (16.2%)	8 (11.8%)	21 (30.9%)			14 (14.1%)	25 (25.3%)	17 (17.2%)			21 (21.0%)	25 (25.0%)	11 (11.0%)			26 (28.0%)	19 (20.4%)	9 (9.7%)
	5		3 (3.3%)	3 (3.3%)	4 (4.4%)			3 (4.4%)	1 (1.5%)	3 (4.4%)			1 (1.0%)	7 (7.1%)	2 (2.0%)			4 (4.0%)	3 (3.0%)	3 (3.0%)			5 (5.4%)	3 (3.2%)	2 (2.2%)
Gleason score	6		6 (6.5%)	1 (1.1%)	4 (4.4%)	0.405 (4.007)		3 (4.4%)	0 (0.0%)	3 (4.4%)	0.812 (1.580)		5 (5.1%)	4 (4.0%)	3 (3.0%)	0.031 (10.646)		7 (7.0%)	3 (3.0%)	2 (2.0%)	0.572 (2.913)		4 (4.3%)	1 (1.8%)	4 (4.3%)	0.569 (4.808)
	7		17 (18.5%)	18 (19.6%)	23 (17.6%)			15 (22.1%)	7 (10.3%)	23 (33.8%)			14 (14.1%)	24 (24.2%)	26 (26.3%)			24 (24.0%)	23 (23.0%)	18 (18.0%)			25 (26.9%)	20 (21.5%)	16 (17.2%)
	≥8		6 (6.5%)	8 (8.7%)	9 (9.8%)			5 (7.4%)	3 (4.4%)	9 (13.2%)			4 (4.0%)	16 (16.2%)	3 (3.0%)			7 (7.0%)	10 (10.0%)	6 (6.0%)			7 (7.5%)	3 (3.2%)	1 (1.8%)
pTNM	T1&T2		22 (25.3%)	12 (13.8%)	22 (25.3%)	0.068 (5.385)		13 (20.0%)	6 (9.2%)	22 (33.8%)	0.964 (0.073)		17 (18.1%)	25 (26.6%)	19 (20.2%)	0.380 (1.933)		27 (28.4%)	22 (23.2%)	13 (13.7%)	0.446 (1.614)		23 (26.1%)	17 (19.3%)	16 (18.2%)	0.784 (0.487)
	T3		6 (6.9%)	13 (14.9%)	12 (13.8%)			7 (10.8%)	4 (6.2%)	13 (20.0%)			5 (5.3%)	16 (17.0%)	12 (12.8%)			10 (10.5%)	14 (14.7%)	9 (9.5%)			14 (15.9%)	11 (12.5%)	7 (8.0%)
Perineural invasion	No		13 (14.1%)	7 (7.6%)	8 (8.7%)	0.120 (4.244)		8 (11.8%)	1 (1.5%)	9 (13.2%)	0.329 (2.220)		7 (7.1%)	15 (15.2%)	9 (9.1%)	0.853 (0.317)		14 (14.0%)	11 (11.0%)	7 (7.0%)	0.687 (0.752)		10 (10.8%)	6 (6.5%)	11 (11.8%)	0.105 (4.503)
	Yes		16 (17.4%)	20 (21.7%)	28 (30.4%)			15 (22.1%)	9 (13.2%)	26 (38.2%)			16 (16.2%)	29 (29.3%)	23 (23.2%)			24 (24.0%)	25 (25.0%)	19 (19.0%)			31 (33.3%)	22 (23.7%)	13 (14.0%)
Positive surgical margins	No		16 (17.8%)	12 (13.3%)	18 (20.0%)	0.799 (0.449)		14 (20.9%)	4 (6.0%)	18 (26.9%)	0.583 (1.283)		16 (16.5%)	21 (21.7%)	15 (15.5%)	0.210 (3.124)		23 (23.5%)	16 (16.3%)	13 (13.3%)	0.352 (2.087)		20 (22.0%)	13 (14.3%)	12 (13.2%)	0.954 (0.094)
	Yes		13 (14.4%)	14 (15.6%)	17 (18.9%)			9 (13.4%)	6 (9.0%)	16 (23.9%)			7 (7.2%)	23 (23.7%)	15 (15.5%)			14 (14.3%)	19 (19.4%)	13 (13.3%)			21 (23.1%)	14 (15.4%)	11 (12.1%)
Extraprostatic extension	No		22 (24.4%)	11 (12.2%)	23 (25.6%)	0.032 (6.863)		12 (18.2%)	6 (9.1%)	21 (31.8%)	0.864 (0.292)		17 (17.6%)	25 (25.8%)	19 (19.6%)	0.439 (1.647)		26 (26.5%)	22 (22.5%)	14 (14.3%)	0.316 (2.307)		23 (25.3%)	17 (18.7%)	16 (17.6%)	0.635 (0.910)
	Yes		7 (7.8%)	15 (16.7%)	12 (13.3%)			10 (15.2%)	4 (6.1%)	13 (19.7%)			6 (6.2%)	18 (18.6%)	12 (12.4%)			10 (10.2%)	14 (14.3%)	12 (12.2%)			17 (18.7%)	11 (12.1%)	7 (7.7%)
Preoperative PSA levels (ng/ml)	≤10		16 (18.0%)	13 (14.6%)	19 (21.4%)	0.891 (0.232)		14 (20.9%)	4 (6.0%)	16 (23.9%)	0.452 (1.590)		15 (15.6%)	21 (21.9%)	16 (16.7%)	0.471 (1.506)		21 (21.7%)	19 (19.6%)	12 (12.4%)	0.660 (0.832)		22 (24.4%)	15 (16.6%)	11 (12.2%)	0.786 (0.481)
	≥11		13 (14.6%)	13 (14.6%)	15 (16.9%)			9 (13.4%)	6 (9.0%)	18 (26.9%)			8 (8.3%)	21 (21.9%)	15 (15.6%)			17 (17.6%)	14 (14.4%)	14 (14.4%)			19 (21.1%)	11 (12.2%)	12 (13.3%)
Biochemical recurrence	No		15 (16.3%)	13 (14.1%)	22 (23.9%)	0.420 (3.900)		9 (13.2%)	6 (8.8%)	21 (30.9%)	0.363 (4.332)		16 (16.2%)	23 (23.2%)	16 (16.2%)	0.606 (2.721)		22 (22.0%)	22 (22.0%)	12 (12.0%)	0.826 (1.505)		22 (23.7%)	16 (17.2%)	13 (14.0%)	0.992 (0.272)
	Yes		12 (13.0%)	9 (9.8%)	12 (13.0%)			10 (14.7%)	4 (5.9%)	9 (13.2%)			6 (6.1%)	16 (16.2%)	13 (13.1%)			13 (13.0%)	11 (11.0%)	11 (11.0%)			14 (15.1%)	8 (8.6%)	8 (8.6%)
	Never tumour free		2 (2.2%)	5 (5.4%)	2 (2.2%)			4 (5.9%)	0 (0.0%)	5 (7.4%)			1 (1.0%)	5 (5.1%)	3 (3.0%)			3 (3.0%)	3 (3.0%)	3 (3.0%)			5 (5.4%)	4 (4.3%)	3 (3.2%)
Time to biochemical recurrence (months)	≤23		6 (20.0%)	6 (20.0%)	3 (10.0%)	0.113 (4.364)		2 (8.7%)	3 (13.0%)	5 (21.7%)	0.111 (4.395)		0 (0.0%)	9 (28.1%)	6 (18.8%)	0.047 (6.119)		3 (9.4%)	7 (21.9%)	5 (15.6%)	0.040 (6.447)		7 (23.3%)	5 (16.7%)	2 (6.7%)	0.305 (2.377)
	≥24		5 (16.6%)	2 (6.7%)	8 (26.7%)			8 (34.8%)	1 (4.3%)	4 (17.4%)			5 (15.6%)	5 (15.6%)	7 (21.9%)			10 (31.3%)	2 (6.3%)	5 (15.6%)			7 (23.3%)	3 (10.0%)	6 (20.0%)
