# Supplementary material for: Clinical and molecular significance of the RNA m6A methyltransferase complex in prostate cancer
Source: Frontiers journal article supplement (doi:10.3389/fgene.2022.1096071), 2023-01-12
Supplement: Data_Sheet_2.zip [file Supplementary_table_3.xlsx]

## Sheet: Sheet1
Supplementary Table 3. Significantly (fold change ±1.5 and FDR-corrected p-value <0.05) differentially expressed genes in shSCR vs shMETTL3 in LNCaP:C4-2 prostate cancer cells.
A) Genes significantly upregulated with shMETTL3									B) Genes significantly downregulated with shMETTL3
Ensembl ID	baseMean	log2FoldChange	lfcSE	stat	pvalue	padj	Gene Symbol		Ensembl ID	baseMean	log2FoldChange	lfcSE	stat	pvalue	padj	Gene Symbol
ENSG00000265203	22.4077	-8.45086	1.21716	-6.94311	3.84e-12	3.25e-11	RBP3		ENSG00000165995	71.158	0.584859	0.249483	2.34428	0.0190636	0.0439146	CACNB2
ENSG00000203857	3.64519	-5.82913	1.45488	-4.00662	6.16e-05	0.00023851	HSD3B1		ENSG00000109756	1000.79	0.585106	0.0572541	10.2195	1.62e-24	3.24e-23	RAPGEF2
ENSG00000204287	1.27177	-5.09012	2.22387	-2.28886	0.0220875	0.0497828	HLA-DRA		ENSG00000080200	585.075	0.585228	0.0893409	6.55051	5.73e-11	4.4e-10	CRYBG3
ENSG00000148123	12.495	-5.05964	0.714226	-7.08409	1.4e-12	1.24e-11	PLPPR1		ENSG00000137628	80.1881	0.585352	0.19995	2.92749	0.00341714	0.009579	DDX60
ENSG00000078725	2.30879	-4.565	1.48282	-3.0786	0.00207978	0.00611522	BRINP1		ENSG00000141294	81.8262	0.585371	0.204031	2.86903	0.00411729	0.0113405	LRRC46
ENSG00000235091	3.25061	-4.17309	1.41938	-2.94008	0.0032813	0.00923217	BX324167.1		ENSG00000141582	10958.6	0.586692	0.0446801	13.1309	2.19e-39	9.24e-38	CBX4
ENSG00000275506	1.45188	-4.14994	1.60789	-2.58099	0.00985164	0.0246248	AC010378.1		ENSG00000196458	278.574	0.587037	0.107502	5.46072	4.74e-08	2.72e-07	ZNF605
ENSG00000249791	1.53704	-4.13451	1.67599	-2.46691	0.0136286	0.032797	AC008494.2		ENSG00000164181	1395.17	0.587055	0.0764087	7.68309	1.55e-14	1.61e-13	ELOVL7
ENSG00000234442	1.83843	-4.09342	1.57435	-2.60007	0.00932047	0.0234441	BX276092.5		ENSG00000150907	344.31	0.587201	0.100495	5.84306	5.12e-09	3.24e-08	FOXO1
ENSG00000254714	1.78821	-3.97385	1.7335	-2.29238	0.0218839	0.0494098	#N/A		ENSG00000156284	114.813	0.58768	0.186325	3.15406	0.00161018	0.00483989	CLDN8
ENSG00000197241	1.9345	-3.95133	1.63505	-2.41664	0.0156643	0.0370255	SLC2A7		ENSG00000036530	66.8768	0.588032	0.224938	2.6142	0.00894379	0.0226042	CYP46A1
ENSG00000136695	5.74305	-3.93719	1.19966	-3.28192	0.00103102	0.00322511	IL36RN		ENSG00000273559	589.31	0.588739	0.099348	5.92603	3.1e-09	2.01e-08	CWC25
ENSG00000234493	1.86721	-3.8406	1.49878	-2.56248	0.0103927	0.025771	RHOXF1P1		ENSG00000168070	328.362	0.58883	0.10445	5.63743	1.73e-08	1.04e-07	MAJIN
ENSG00000137948	6.02649	-3.78302	0.831098	-4.55183	5.32e-06	2.4e-05	BRDT		ENSG00000213865	86.9364	0.58887	0.206757	2.84813	0.00439765	0.0120296	#N/A
ENSG00000121858	3.57979	-3.73285	1.26048	-2.96145	0.00306198	0.00866685	TNFSF10		ENSG00000178922	207.496	0.589126	0.12174	4.8392	1.3e-06	6.35e-06	HYI
ENSG00000249956	19.3708	-3.62294	1.31769	-2.74946	0.00596934	0.0157959	UGT2B24P		ENSG00000177853	1198.92	0.590302	0.073394	8.04292	8.77e-16	9.97e-15	ZNF518A
ENSG00000205879	4.74839	-3.52362	1.49236	-2.36111	0.0182204	0.0422275	FAM90A2P		ENSG00000151779	1141.66	0.590444	0.0641969	9.19739	3.67e-20	5.56e-19	NBAS
ENSG00000113389	30.3778	-3.44931	0.395354	-8.72462	2.67e-18	3.61e-17	NPR3		ENSG00000228672	520.603	0.590465	0.0905234	6.52279	6.9e-11	5.25e-10	PROB1
ENSG00000170465	5.55224	-3.44221	0.830009	-4.14719	3.37e-05	0.000135429	KRT6C		ENSG00000006459	2167.72	0.590545	0.0468962	12.5926	2.32e-36	8.46e-35	KDM7A
ENSG00000115263	3.59307	-3.40561	0.991499	-3.43481	0.000592965	0.00194796	GCG		ENSG00000262172	70.8212	0.591555	0.185583	3.18755	0.00143484	0.00435121	AC116025.2
ENSG00000262921	2.16692	-3.36779	1.34179	-2.50992	0.0120757	0.0294317	AC118754.2		ENSG00000100360	1299.94	0.591751	0.0574759	10.2956	7.37e-25	1.5e-23	IFT27
ENSG00000279464	4.54269	-3.31782	1.42631	-2.32615	0.0200103	0.0457861	AC096720.2		ENSG00000229043	375.184	0.591851	0.091485	6.46938	9.84e-11	7.39e-10	AC091729.3
ENSG00000118972	2.73856	-3.2841	1.37695	-2.38506	0.0170763	0.0399475	FGF23		ENSG00000120458	275.644	0.59194	0.103681	5.70921	1.14e-08	6.9e-08	MSANTD2
ENSG00000151962	64.1179	-3.26928	0.264744	-12.3488	4.94e-35	1.69e-33	RBM46		ENSG00000198416	111.846	0.592437	0.186104	3.18336	0.00145576	0.00441051	ZNF658B
ENSG00000255408	2.60659	-3.25573	1.24127	-2.62289	0.00871867	0.022102	PCDHA3		ENSG00000131797	395.021	0.592745	0.107304	5.524	3.31e-08	1.93e-07	CLUHP3
ENSG00000150361	39.3585	-3.23246	0.32445	-9.96288	2.22e-23	4.12e-22	KLHL1		ENSG00000128346	137.478	0.592839	0.173849	3.41009	0.000649426	0.00211973	C22orf23
ENSG00000148735	15.1478	-3.18177	0.446405	-7.12755	1.02e-12	9.17e-12	PLEKHS1		ENSG00000104361	543.047	0.593352	0.0994459	5.96658	2.42e-09	1.58e-08	NIPAL2
ENSG00000278965	28.1769	-3.16717	0.54873	-5.77182	7.84e-09	4.86e-08	AC122713.2		ENSG00000131471	49.3987	0.593566	0.253369	2.3427	0.019145	0.0440785	AOC3
ENSG00000183034	2.95061	-3.12575	1.10603	-2.82611	0.00471176	0.0127929	OTOP2		ENSG00000130751	225.492	0.593829	0.153479	3.86911	0.000109234	0.000405178	NPAS1
ENSG00000197888	367.511	-3.09216	0.125484	-24.6418	4.5e-134	2.65e-131	UGT2B17		ENSG00000234665	57.6145	0.593905	0.256308	2.31716	0.0204951	0.046718	LERFS
ENSG00000169174	58.1603	-3.08175	0.268992	-11.4566	2.18e-30	5.99e-29	PCSK9		ENSG00000196263	75.027	0.594257	0.220809	2.69127	0.00711796	0.0184614	ZNF471
ENSG00000169418	4.7395	-3.05372	1.17233	-2.60482	0.00919223	0.023162	NPR1		ENSG00000136770	1788.55	0.594329	0.0749216	7.93267	2.14e-15	2.37e-14	DNAJC1
ENSG00000161031	5.86034	-3.02436	0.889487	-3.40011	0.000673577	0.00219029	PGLYRP2		ENSG00000026559	479.946	0.594727	0.0977503	6.08415	1.17e-09	7.9e-09	KCNG1
ENSG00000223723	10.4649	-2.99886	0.567412	-5.28516	1.26e-07	6.88e-07	BX842568.2		ENSG00000163939	3622.42	0.594954	0.0450004	13.2211	6.63e-40	2.88e-38	PBRM1
ENSG00000112539	3.73261	-2.99739	1.10898	-2.70283	0.00687521	0.0179089	C6orf118		ENSG00000162878	232.672	0.595012	0.149437	3.9817	6.84e-05	0.000262954	PKDCC
ENSG00000186297	3.23172	-2.96309	0.986252	-3.00439	0.00266113	0.0076323	GABRA5		ENSG00000230409	73.809	0.595467	0.256788	2.31891	0.0204	0.046534	TCEA1P2
ENSG00000164379	34.4118	-2.92823	0.304899	-9.60392	7.7e-22	1.3e-20	FOXQ1		ENSG00000144026	372.095	0.596018	0.101345	5.88107	4.08e-09	2.61e-08	ZNF514
ENSG00000114200	148.594	-2.89612	0.180849	-16.014	1.02e-57	9.18e-56	BCHE		ENSG00000139714	107.21	0.596398	0.167644	3.55753	0.000374355	0.00127268	MORN3
ENSG00000121871	21.1777	-2.87323	0.388776	-7.39046	1.46e-13	1.41e-12	SLITRK3		ENSG00000167525	136.613	0.596499	0.159623	3.73693	0.000186278	0.00066497	PROCA1
ENSG00000228397	3.05644	-2.87171	1.21483	-2.36387	0.0180851	0.0419626	LINC01635		ENSG00000167216	74.1635	0.597288	0.229534	2.60218	0.00926336	0.0233208	KATNAL2
ENSG00000108700	2.19729	-2.84996	1.22328	-2.32976	0.0198186	0.0453794	CCL8		ENSG00000070601	380.127	0.597668	0.0953651	6.26715	3.68e-10	2.61e-09	FRMPD1
ENSG00000226363	7.47455	-2.84259	0.697896	-4.07309	4.64e-05	0.000182982	HAGLROS		ENSG00000134899	232.509	0.597894	0.118913	5.028	4.96e-07	2.53e-06	ERCC5
ENSG00000055813	125.271	-2.82891	0.160633	-17.6111	2.03e-69	2.69e-67	CCDC85A		ENSG00000214595	86.8893	0.597957	0.236151	2.53209	0.0113385	0.0278313	EML6
ENSG00000186458	12.7548	-2.7948	0.783825	-3.56559	0.000363043	0.00123653	DEFB132		ENSG00000233382	69.59	0.598404	0.237397	2.52069	0.0117125	0.0286569	NKAPP1
ENSG00000145321	72.019	-2.74822	0.188559	-14.5748	4.06e-48	2.5e-46	GC		ENSG00000122417	897.831	0.598578	0.0619776	9.65797	4.55e-22	7.76e-21	ODF2L
ENSG00000164089	38.2765	-2.70506	0.284674	-9.50231	2.05e-21	3.38e-20	ETNPPL		ENSG00000261652	169.554	0.598821	0.156008	3.8384	0.000123839	0.000454796	C15orf65
ENSG00000122641	7.55787	-2.70111	0.815405	-3.31259	0.000924358	0.00292108	INHBA		ENSG00000163171	267.446	0.598933	0.123868	4.83523	1.33e-06	6.48e-06	CDC42EP3
ENSG00000173208	3.65222	-2.69284	1.14027	-2.36157	0.0181975	0.042182	ABCD2		ENSG00000131051	9717.08	0.599088	0.0426679	14.0407	8.78e-45	4.79e-43	RBM39
ENSG00000256597	8.20716	-2.68633	0.681593	-3.94125	8.11e-05	0.000307176	LINC02393		ENSG00000177463	1661.13	0.59912	0.0593245	10.099	5.58e-24	1.08e-22	NR2C2
ENSG00000244468	9.48808	-2.65703	0.739168	-3.59462	0.000324862	0.00111425	AC093001.1		ENSG00000262246	86.5688	0.59964	0.190916	3.14086	0.00168453	0.00504581	CORO7
ENSG00000178726	5.64289	-2.64758	0.955104	-2.77203	0.00557078	0.0148529	THBD		ENSG00000185684	688.221	0.599921	0.0882222	6.80011	1.05e-11	8.55e-11	EP400P1
ENSG00000019102	5.72045	-2.63309	0.931538	-2.8266	0.00470445	0.0127744	VSIG2		ENSG00000120686	5282.65	0.600176	0.0387448	15.4905	4.02e-54	3.14e-52	UFM1
ENSG00000090402	31.3065	-2.62484	0.285279	-9.20095	3.55e-20	5.38e-19	SI		ENSG00000143178	35.3666	0.600436	0.259348	2.31517	0.0206036	0.0469322	TBX19
ENSG00000102879	55.1245	-2.61459	0.354957	-7.36594	1.76e-13	1.69e-12	CORO1A		ENSG00000136895	266.746	0.600661	0.131296	4.57485	4.77e-06	2.16e-05	GARNL3
ENSG00000101670	46.1305	-2.6084	0.250719	-10.4037	2.39e-25	4.95e-24	LIPG		ENSG00000166450	210.742	0.600832	0.128323	4.68218	2.84e-06	1.32e-05	PRTG
ENSG00000132854	5.84767	-2.5936	0.713522	-3.63493	0.00027806	0.000965222	KANK4		ENSG00000008735	1185.89	0.601339	0.0711189	8.45539	2.78e-17	3.51e-16	MAPK8IP2
ENSG00000169908	55.5491	-2.59194	0.263902	-9.82158	9.09e-23	1.63e-21	TM4SF1		ENSG00000196154	58.3381	0.601655	0.227503	2.64461	0.00817853	0.0208963	S100A4
ENSG00000127589	5.039	-2.52905	0.799967	-3.16144	0.00156989	0.004727	TUBBP1		ENSG00000089335	947.133	0.601993	0.063754	9.44244	3.64e-21	5.91e-20	ZNF302
ENSG00000234352	8.41596	-2.52144	0.840245	-3.00084	0.00269232	0.00771237	AC009264.1		ENSG00000261474	72.1617	0.602458	0.193751	3.10944	0.00187444	0.00556193	AC026471.4
ENSG00000006747	11.51	-2.52035	0.614518	-4.10134	4.11e-05	0.000163206	SCIN		ENSG00000165810	626.481	0.60353	0.083053	7.2668	3.68e-13	3.44e-12	BTNL9
ENSG00000174469	368.706	-2.50162	0.148242	-16.8752	6.84e-64	7.68e-62	CNTNAP2		ENSG00000014914	122.926	0.603554	0.158231	3.81438	0.000136527	0.000498638	MTMR11
ENSG00000258314	5.41304	-2.48575	0.975062	-2.54932	0.0107933	0.0266495	AL589182.1		ENSG00000213190	215.123	0.603864	0.122998	4.90955	9.13e-07	4.53e-06	MLLT11
ENSG00000179673	12.2789	-2.46731	0.579279	-4.25928	2.05e-05	8.5e-05	RPRML		ENSG00000231721	186.19	0.604187	0.157066	3.84672	0.000119712	0.000440763	LINC-PINT
ENSG00000189057	356.059	-2.45736	0.121762	-20.1816	1.42e-90	3.54e-88	FAM111B		ENSG00000136828	574.898	0.604192	0.0970175	6.22766	4.73e-10	3.32e-09	RALGPS1
ENSG00000233251	343.918	-2.43737	0.0939369	-25.9468	1.97e-148	1.42e-145	AC007743.1		ENSG00000223959	513.851	0.604198	0.0985433	6.1313	8.72e-10	5.97e-09	AFG3L1P
ENSG00000275682	6.58391	-2.38782	0.929266	-2.56958	0.0101823	0.0253315	#N/A		ENSG00000157796	700.702	0.60455	0.0729154	8.29111	1.12e-16	1.36e-15	WDR19
ENSG00000172243	81.2805	-2.38196	0.227127	-10.4874	9.87e-26	2.1e-24	CLEC7A		ENSG00000197279	147.458	0.604744	0.135973	4.44753	8.69e-06	3.8e-05	ZNF165
ENSG00000249210	2.9798	-2.3798	1.01493	-2.3448	0.0190371	0.0438666	GAPDHP38		ENSG00000183779	3738.45	0.604875	0.0793765	7.62032	2.53e-14	2.6e-13	ZNF703
ENSG00000144063	4.80847	-2.36944	1.00124	-2.36651	0.0179567	0.0417134	MALL		ENSG00000133460	456.577	0.604891	0.10719	5.64318	1.67e-08	1e-07	SLC2A11
ENSG00000124126	1004.46	-2.36027	0.0835375	-28.254	1.27e-175	1.57e-172	PREX1		ENSG00000267454	81.1559	0.60586	0.224521	2.69845	0.0069663	0.0181206	ZNF582-AS1
ENSG00000281131	10.5189	-2.35363	0.626129	-3.75902	0.000170577	0.000612465	SCHLAP1		ENSG00000143952	1092.62	0.606195	0.0580743	10.4383	1.66e-25	3.48e-24	VPS54
ENSG00000139304	3.81116	-2.34465	0.892232	-2.62785	0.00859265	0.021821	PTPRQ		ENSG00000033030	1614.78	0.606781	0.0511239	11.8688	1.72e-32	5.21e-31	ZCCHC8
ENSG00000109181	77.7867	-2.30932	0.209003	-11.0493	2.21e-28	5.46e-27	UGT2B10		ENSG00000025039	635.097	0.606912	0.0924287	6.56627	5.16e-11	3.98e-10	RRAGD
ENSG00000265342	4.384	-2.28192	0.917168	-2.48801	0.0128461	0.0311247	AC011933.3		ENSG00000237846	58.3857	0.607193	0.23031	2.63642	0.0083787	0.0213425	AL773545.3
ENSG00000115590	12.2235	-2.27238	0.586208	-3.8764	0.000106012	0.000394019	IL1R2		ENSG00000260563	108.408	0.607319	0.191863	3.16538	0.00154879	0.00467107	AC132872.1
ENSG00000231503	4.41423	-2.24207	0.946764	-2.36814	0.017878	0.0415566	PTMAP4		ENSG00000070778	987.697	0.607807	0.0889066	6.83646	8.12e-12	6.7e-11	PTPN21
ENSG00000256356	3.74067	-2.23207	0.944161	-2.36408	0.018075	0.0419431	HSPA8P5		ENSG00000000457	410.26	0.607955	0.0949022	6.40612	1.49e-10	1.1e-09	SCYL3
ENSG00000117148	32.2787	-2.22716	0.328911	-6.7713	1.28e-11	1.04e-10	ACTL8		ENSG00000152409	2279.52	0.608616	0.0435266	13.9826	1.99e-44	1.07e-42	JMY
ENSG00000250327	4.4823	-2.21998	0.962242	-2.30709	0.0210496	0.0477845	RPSAP70		ENSG00000129675	313.814	0.608815	0.143941	4.22961	2.34e-05	9.63e-05	ARHGEF6
ENSG00000196620	1107.02	-2.20042	0.0788529	-27.9054	2.3e-171	2.59e-168	UGT2B15		ENSG00000204152	450.637	0.609333	0.0951305	6.40523	1.5e-10	1.11e-09	TIMM23B
ENSG00000137561	24.8175	-2.19922	0.368629	-5.96595	2.43e-09	1.59e-08	TTPA		ENSG00000115548	1277.04	0.609475	0.0974108	6.25674	3.93e-10	2.79e-09	KDM3A
ENSG00000171234	12.3062	-2.19153	0.57128	-3.83616	0.000124971	0.000458758	UGT2B7		ENSG00000176624	1214.89	0.609601	0.0597659	10.1998	1.99e-24	3.93e-23	MEX3C
ENSG00000205835	11.5902	-2.14152	0.828302	-2.58543	0.00972564	0.0243475	GMNC		ENSG00000256223	255.548	0.609868	0.122388	4.98307	6.26e-07	3.16e-06	ZNF10
ENSG00000164120	242.772	-2.13895	0.380137	-5.62678	1.84e-08	1.1e-07	HPGD		ENSG00000224934	72.8975	0.610806	0.209527	2.91517	0.00355499	0.00993427	AL391684.1
ENSG00000262179	4.56508	-2.12655	0.762563	-2.7887	0.00529209	0.0141872	MYMX		ENSG00000196998	2419.85	0.610977	0.0606398	10.0755	7.09e-24	1.36e-22	WDR45
ENSG00000184828	23.0059	-2.12222	0.535706	-3.96155	7.45e-05	0.000284185	ZBTB7C		ENSG00000111203	570.24	0.61152	0.0783444	7.80554	5.92e-15	6.34e-14	ITFG2
ENSG00000171227	72.2149	-2.10926	0.207938	-10.1437	3.53e-24	6.89e-23	TMEM37		ENSG00000108947	101.475	0.611786	0.204245	2.99536	0.00274125	0.00783867	EFNB3
ENSG00000182631	6.91302	-2.09332	0.683406	-3.06307	0.00219078	0.0064161	RXFP3		ENSG00000150961	1844.48	0.612005	0.0511198	11.972	4.98e-33	1.54e-31	SEC24D
ENSG00000117322	19.239	-2.06963	0.556445	-3.71938	0.000199714	0.00070961	CR2		ENSG00000197321	813.621	0.612019	0.0637544	9.59963	8.02e-22	1.35e-20	SVIL
ENSG00000236824	64.501	-2.06551	0.789598	-2.6159	0.00889917	0.0225024	BCYRN1		ENSG00000130203	70.4591	0.612646	0.255114	2.40145	0.01633	0.0383993	APOE
ENSG00000253333	16.0727	-2.06541	0.40682	-5.07697	3.84e-07	1.99e-06	AC146944.3		ENSG00000119699	44.7779	0.613036	0.264135	2.32092	0.0202914	0.0463148	TGFB3
ENSG00000113494	73.9173	-2.05448	0.192293	-10.6841	1.21e-26	2.73e-25	PRLR		ENSG00000130396	2846.5	0.613545	0.0474949	12.9181	3.56e-38	1.41e-36	AFDN
ENSG00000273294	7.70371	-2.05348	0.673127	-3.05065	0.00228345	0.00665815	C1QTNF3-AMACR		ENSG00000096968	469.364	0.613785	0.0910773	6.73917	1.59e-11	1.28e-10	JAK2
ENSG00000188037	5.25443	-2.04552	0.720696	-2.83825	0.00453615	0.0123615	CLCN1		ENSG00000249348	133.25	0.615368	0.139699	4.40495	1.06e-05	4.57e-05	UGDH-AS1
ENSG00000180767	15.5586	-2.03951	0.430919	-4.73292	2.21e-06	1.05e-05	CHST13		ENSG00000131037	76.6249	0.61537	0.265441	2.31829	0.0204336	0.0466064	EPS8L1
ENSG00000280310	14.5045	-2.03329	0.819019	-2.48259	0.0130431	0.0315462	AC092437.1		ENSG00000198855	586.559	0.616507	0.0851223	7.2426	4.4e-13	4.09e-12	FICD
ENSG00000215113	7.45057	-2.00897	0.609213	-3.29765	0.00097497	0.00306719	CXorf49B		ENSG00000127329	98.3922	0.616954	0.167204	3.68982	0.000224414	0.000790544	PTPRB
ENSG00000143502	34.5709	-2.00765	0.303074	-6.62428	3.49e-11	2.73e-10	SUSD4		ENSG00000070540	687.1	0.617104	0.0887978	6.94954	3.66e-12	3.11e-11	WIPI1
ENSG00000117226	7.80409	-2.00535	0.595907	-3.3652	0.000764876	0.00245786	GBP3		ENSG00000182463	78.9199	0.617716	0.241833	2.55431	0.0106398	0.0263156	TSHZ2
ENSG00000118513	49.6996	-1.99475	0.264594	-7.53892	4.74e-14	4.74e-13	MYB		ENSG00000277147	124.528	0.618103	0.174075	3.55078	0.000384084	0.00130289	LINC00869
ENSG00000213759	1986.04	-1.98766	0.0844509	-23.5363	1.73e-122	8.02e-120	UGT2B11		ENSG00000274561	45.7104	0.619164	0.269143	2.3005	0.0214198	0.0485058	AC005332.3
ENSG00000080493	197.493	-1.98591	0.132027	-15.0417	3.91e-51	2.75e-49	SLC4A4		ENSG00000116001	1453.57	0.619234	0.055758	11.1058	1.18e-28	2.95e-27	TIA1
ENSG00000256971	7.17836	-1.97849	0.720442	-2.74621	0.00602873	0.0159378	LINC00508		ENSG00000266714	633.474	0.619448	0.106583	5.81186	6.18e-09	3.87e-08	MYO15B
ENSG00000152086	304.434	-1.95798	0.113465	-17.2562	1.01e-66	1.25e-64	TUBA3E		ENSG00000197928	121.891	0.620115	0.152097	4.07712	4.56e-05	0.000180118	ZNF677
ENSG00000164125	154.514	-1.95606	0.131858	-14.8346	8.75e-50	5.71e-48	GASK1B		ENSG00000168297	607.567	0.620212	0.0786916	7.88156	3.23e-15	3.53e-14	PXK
ENSG00000189212	14.0368	-1.94007	0.647954	-2.99414	0.00275217	0.00786295	DPY19L2P1		ENSG00000205189	2080.07	0.620223	0.0486006	12.7616	2.68e-37	1.02e-35	ZBTB10
ENSG00000111331	374.814	-1.93085	0.0995725	-19.3914	9.12e-84	1.82e-81	OAS3		ENSG00000145029	147.186	0.620442	0.228622	2.71383	0.00665102	0.0173873	NICN1
ENSG00000148344	50.3131	-1.92209	0.24715	-7.77702	7.43e-15	7.89e-14	PTGES		ENSG00000161664	40.8265	0.620599	0.268373	2.31245	0.0207529	0.0472307	ASB16
ENSG00000229896	21.7055	-1.91055	0.467623	-4.08567	4.4e-05	0.00017393	AL157373.2		ENSG00000137504	3276.72	0.620828	0.0426832	14.545	6.28e-48	3.84e-46	CREBZF
ENSG00000150540	6.82737	-1.89989	0.659518	-2.88072	0.00396762	0.0109702	HNMT		ENSG00000164638	248.984	0.620969	0.151144	4.10845	3.98e-05	0.000158576	SLC29A4
ENSG00000170522	965.829	-1.87265	0.0849155	-22.0531	8.91e-108	3.3e-105	ELOVL6		ENSG00000161551	137.271	0.621192	0.159499	3.89465	9.83e-05	0.000367666	ZNF577
ENSG00000226286	10.8526	-1.86899	0.512407	-3.64747	0.000264834	0.000922648	AL008733.1		ENSG00000268575	100.997	0.621218	0.173529	3.5799	0.000343719	0.00117582	AL031282.2
ENSG00000122035	204.506	-1.86531	0.144824	-12.8798	5.85e-38	2.3e-36	RASL11A		ENSG00000064652	528.02	0.62167	0.0931216	6.6759	2.46e-11	1.95e-10	SNX24
ENSG00000197635	626.668	-1.86128	0.0959816	-19.392	9.01e-84	1.81e-81	DPP4		ENSG00000196890	141.336	0.622108	0.170332	3.65233	0.000259873	0.000906705	HIST3H2BB
ENSG00000067798	90.9394	-1.86028	0.203248	-9.15274	5.55e-20	8.33e-19	NAV3		ENSG00000149428	12793.6	0.622859	0.0369149	16.8728	7.13e-64	7.96e-62	HYOU1
ENSG00000065328	825.307	-1.83487	0.0946595	-19.3839	1.05e-83	2.09e-81	MCM10		ENSG00000148200	243.171	0.622864	0.13266	4.69518	2.66e-06	1.25e-05	NR6A1
ENSG00000113749	7.85978	-1.83242	0.684852	-2.67564	0.0074586	0.0192466	HRH2		ENSG00000075643	2788.19	0.623184	0.0516315	12.0698	1.52e-33	4.83e-32	MOCOS
ENSG00000164362	99.8407	-1.82586	0.244028	-7.48218	7.31e-14	7.21e-13	TERT		ENSG00000166321	129.577	0.62328	0.161152	3.86766	0.000109885	0.000407361	NUDT13
ENSG00000107742	407.495	-1.82341	0.0845531	-21.5652	3.81e-103	1.32e-100	SPOCK2		ENSG00000171365	535.578	0.623389	0.0885476	7.04016	1.92e-12	1.68e-11	CLCN5
ENSG00000135226	1033.18	-1.8214	0.121868	-14.9457	1.66e-50	1.13e-48	UGT2B28		ENSG00000115760	3602.54	0.623732	0.056631	11.014	3.27e-28	8.02e-27	BIRC6
ENSG00000205361	9.25185	-1.81476	0.534151	-3.39747	0.000680121	0.00220935	MT1DP		ENSG00000165113	377.845	0.623823	0.115497	5.40122	6.62e-08	3.74e-07	GKAP1
ENSG00000259498	5.72882	-1.80916	0.771902	-2.34377	0.0190901	0.0439679	TPM1-AS		ENSG00000063127	64.3919	0.624558	0.217835	2.86711	0.00414238	0.0114035	SLC6A16
ENSG00000265763	24.8376	-1.80683	0.416164	-4.34163	1.41e-05	5.99e-05	ZNF488		ENSG00000188747	530.341	0.624764	0.0826461	7.55951	4.05e-14	4.06e-13	NOXA1
ENSG00000165474	354.718	-1.80588	0.112193	-16.0962	2.71e-58	2.51e-56	GJB2		ENSG00000068078	322.114	0.624916	0.159571	3.91622	8.99e-05	0.000338149	FGFR3
ENSG00000118520	44.0004	-1.80568	0.336324	-5.36888	7.92e-08	4.44e-07	ARG1		ENSG00000258708	124.218	0.624948	0.177019	3.53041	0.00041492	0.00140052	SLC25A21-AS1
ENSG00000137766	50.6475	-1.80514	0.217456	-8.30119	1.03e-16	1.25e-15	UNC13C		ENSG00000272791	41.3743	0.625174	0.273128	2.28894	0.0220827	0.0497763	AC073389.3
ENSG00000134824	22417.2	-1.80441	0.0691346	-26.0999	3.65e-150	2.7e-147	FADS2		ENSG00000218510	298.146	0.62522	0.11428	5.47096	4.48e-08	2.58e-07	LINC00339
ENSG00000230159	36.0622	-1.80049	0.287985	-6.25202	4.05e-10	2.87e-09	BX119904.2		ENSG00000166275	878.452	0.625389	0.0876985	7.13113	9.96e-13	8.96e-12	BORCS7
ENSG00000260228	8.25893	-1.79272	0.653953	-2.74137	0.00611842	0.0161469	AC009119.1		ENSG00000171606	1047.57	0.625487	0.060024	10.4206	2e-25	4.16e-24	ZNF274
ENSG00000112759	1137.13	-1.78817	0.0609171	-29.3542	2.11e-189	4.21e-186	SLC29A1		ENSG00000196605	69.2665	0.625585	0.217519	2.876	0.00402752	0.0111228	ZNF846
ENSG00000230392	17.3474	-1.77368	0.601319	-2.94966	0.00318127	0.00897433	AC004835.1		ENSG00000244560	164.764	0.625751	0.148423	4.21601	2.49e-05	0.000101908	AC004890.2
ENSG00000170190	10.7486	-1.76936	0.618725	-2.85969	0.00424058	0.0116417	SLC16A5		ENSG00000245498	79.4641	0.626294	0.212524	2.94694	0.00320939	0.00904655	AP000866.1
ENSG00000103196	65.0417	-1.76739	0.371532	-4.75705	1.96e-06	9.36e-06	CRISPLD2		ENSG00000203761	233.963	0.626359	0.124148	5.04527	4.53e-07	2.33e-06	MSTO2P
ENSG00000234223	8.47191	-1.75942	0.639918	-2.74945	0.00596955	0.0157959	AC003988.1		ENSG00000113108	724.677	0.626551	0.0740842	8.45728	2.74e-17	3.46e-16	APBB3
ENSG00000124479	5.89404	-1.74908	0.613128	-2.85271	0.00433487	0.0118792	NDP		ENSG00000198707	1107.83	0.626793	0.0748235	8.37695	5.43e-17	6.69e-16	CEP290
ENSG00000236935	8.61606	-1.74779	0.513728	-3.40217	0.000668534	0.0021758	AP003774.2		ENSG00000198945	279.048	0.626871	0.126291	4.96371	6.92e-07	3.48e-06	L3MBTL3
ENSG00000149970	13.9148	-1.74229	0.477471	-3.64899	0.000263277	0.000917715	CNKSR2		ENSG00000231889	78.6057	0.627148	0.271428	2.31055	0.0208576	0.0474149	TRAF3IP2-AS1
ENSG00000164237	4465.43	-1.72707	0.0435878	-39.6227	0	0	CMBL		ENSG00000185485	460.091	0.628657	0.0874802	7.18628	6.66e-13	6.09e-12	SDHAP1
ENSG00000079841	391.589	-1.72361	0.0987372	-17.4565	3.07e-68	4e-66	RIMS1		ENSG00000174353	241.944	0.629158	0.126607	4.96937	6.72e-07	3.39e-06	STAG3L3
ENSG00000175745	933.315	-1.71543	0.0689456	-24.8808	1.2e-136	7.23e-134	NR2F1		ENSG00000185596	542.825	0.629429	0.0973444	6.466	1.01e-10	7.55e-10	WASH3P
ENSG00000183780	9.57861	-1.71451	0.647419	-2.64822	0.00809163	0.020711	SLC35F3		ENSG00000110925	1262.77	0.629673	0.0558139	11.2817	1.62e-29	4.22e-28	CSRNP2
ENSG00000240184	72.4804	-1.70108	0.22041	-7.71781	1.18e-14	1.24e-13	PCDHGC3		ENSG00000242802	974.595	0.629805	0.0661157	9.52579	1.64e-21	2.72e-20	AP5Z1
ENSG00000124097	31.0316	-1.69895	0.310757	-5.46713	4.57e-08	2.63e-07	HMGB1P1		ENSG00000150676	30.3066	0.63077	0.272831	2.31194	0.0207808	0.0472819	CCDC83
ENSG00000143753	10176.3	-1.69201	0.049915	-33.8979	7.16e-252	6.18e-248	DEGS1		ENSG00000135205	94.3372	0.63124	0.188186	3.35435	0.000795524	0.00254876	CCDC146
ENSG00000099260	14.054	-1.67778	0.436089	-3.84734	0.000119409	0.000439774	PALMD		ENSG00000151694	620.22	0.631285	0.0770734	8.19069	2.6e-16	3.06e-15	ADAM17
ENSG00000171388	296.82	-1.67102	0.130426	-12.812	1.4e-37	5.42e-36	APLN		ENSG00000197714	173.02	0.632159	0.175578	3.60045	0.000317662	0.001091	ZNF460
ENSG00000186470	187.488	-1.67026	0.145826	-11.4538	2.25e-30	6.17e-29	BTN3A2		ENSG00000172985	139.619	0.632245	0.223635	2.82713	0.0046967	0.0127547	SH3RF3
ENSG00000237457	9.26894	-1.66767	0.582446	-2.86321	0.00419368	0.0115276	LINC01351		ENSG00000171992	59.7036	0.632963	0.242765	2.60731	0.00912576	0.0230169	SYNPO
ENSG00000263432	9.34845	-1.66721	0.621798	-2.68127	0.00733428	0.0189674	RN7SL689P		ENSG00000226752	789.484	0.633485	0.0712867	8.88644	6.31e-19	8.85e-18	CUTALP
ENSG00000132872	21.7775	-1.66482	0.395622	-4.2081	2.58e-05	0.000105339	SYT4		ENSG00000215045	97.3552	0.635399	0.217298	2.92409	0.00345466	0.00967059	GRID2IP
ENSG00000171848	1558.61	-1.65544	0.0808953	-20.464	4.51e-93	1.21e-90	RRM2		ENSG00000177082	374.255	0.63761	0.0931799	6.84279	7.77e-12	6.42e-11	WDR73
ENSG00000253203	27.5533	-1.64495	0.31217	-5.2694	1.37e-07	7.47e-07	GUSBP3		ENSG00000152117	660.821	0.638334	0.107662	5.92904	3.05e-09	1.97e-08	AC073869.1
ENSG00000075290	102.827	-1.64143	0.185343	-8.85618	8.28e-19	1.16e-17	WNT8B		ENSG00000220201	50.9885	0.63893	0.250196	2.55372	0.010658	0.0263557	ZGLP1
ENSG00000185942	27.6459	-1.64001	0.335911	-4.88227	1.05e-06	5.17e-06	NKAIN3		ENSG00000165312	319.519	0.639196	0.115976	5.51147	3.56e-08	2.07e-07	OTUD1
ENSG00000089127	36.4884	-1.632	0.260795	-6.2578	3.9e-10	2.77e-09	OAS1		ENSG00000119801	1174.5	0.639347	0.0663786	9.63182	5.87e-22	9.96e-21	YPEL5
ENSG00000226870	14.8667	-1.63131	0.458555	-3.55751	0.000374394	0.00127268	BX276092.2		ENSG00000231711	166.825	0.639578	0.14495	4.4124	1.02e-05	4.43e-05	LINC00899
ENSG00000256235	58.9742	-1.62952	0.262762	-6.20152	5.59e-10	3.9e-09	SMIM3		ENSG00000176809	186.184	0.6399	0.131188	4.87775	1.07e-06	5.28e-06	LRRC37A3
ENSG00000254827	21.6404	-1.62426	0.373365	-4.35034	1.36e-05	5.77e-05	SLC22A18AS		ENSG00000185222	425.093	0.639952	0.148377	4.313	1.61e-05	6.77e-05	TCEAL9
ENSG00000154146	257.033	-1.62103	0.15593	-10.3959	2.59e-25	5.36e-24	NRGN		ENSG00000198727	64145.5	0.640683	0.147945	4.33056	1.49e-05	6.28e-05	MT-CYB
ENSG00000183508	107.628	-1.61955	0.187652	-8.63058	6.1e-18	8.05e-17	TENT5C		ENSG00000148824	289.113	0.640806	0.123065	5.20707	1.92e-07	1.03e-06	MTG1
ENSG00000279954	11.7448	-1.61887	0.530045	-3.05421	0.00225651	0.00658626	BX324167.2		ENSG00000014123	1863.27	0.640886	0.0635939	10.0778	6.93e-24	1.33e-22	UFL1
ENSG00000272663	12.0005	-1.61873	0.485108	-3.33686	0.00084732	0.00270002	AC093635.1		ENSG00000231074	1059.59	0.641261	0.0592758	10.8183	2.82e-27	6.56e-26	HCG18
ENSG00000064195	6.1293	-1.61496	0.684105	-2.36068	0.0182412	0.0422644	DLX3		ENSG00000238197	118.364	0.641479	0.163711	3.91837	8.92e-05	0.000335388	PAXBP1-AS1
ENSG00000164175	17.6394	-1.6143	0.434759	-3.7131	0.000204735	0.000726256	SLC45A2		ENSG00000167771	130.217	0.641608	0.162313	3.9529	7.72e-05	0.000293754	RCOR2
ENSG00000069011	4068.42	-1.61411	0.0513427	-31.438	6.13e-217	3.18e-213	PITX1		ENSG00000229729	92.4841	0.642089	0.176856	3.63057	0.000282798	0.000980201	#N/A
ENSG00000166736	33.8912	-1.60521	0.329764	-4.86776	1.13e-06	5.54e-06	HTR3A		ENSG00000144488	102.48	0.642146	0.277399	2.31488	0.0206193	0.0469555	ESPNL
ENSG00000100181	30.1213	-1.60439	0.298494	-5.37494	7.66e-08	4.3e-07	TPTEP1		ENSG00000186010	129.017	0.642329	0.168831	3.80457	0.000142051	0.000517355	NDUFA13
ENSG00000165194	160.803	-1.60003	0.131442	-12.1729	4.33e-34	1.42e-32	PCDH19		ENSG00000143434	205.665	0.642355	0.131366	4.88981	1.01e-06	4.98e-06	SEMA6C
ENSG00000184292	22.6156	-1.59673	0.47868	-3.3357	0.000850834	0.00270956	TACSTD2		ENSG00000196756	1025.88	0.643376	0.0723398	8.8938	5.91e-19	8.3e-18	SNHG17
ENSG00000241741	8.20604	-1.5963	0.602959	-2.64744	0.00811032	0.0207548	RPL7AP30		ENSG00000233184	263.102	0.644102	0.118943	5.4152	6.12e-08	3.47e-07	AC093157.1
ENSG00000074410	214.545	-1.59623	0.121714	-13.1147	2.71e-39	1.14e-37	CA12		ENSG00000183889	54.7096	0.644497	0.226457	2.84601	0.0044271	0.0120999	AC138969.1
ENSG00000184719	14.7946	-1.59303	0.476808	-3.34103	0.000834682	0.00266401	RNLS		ENSG00000216937	131.515	0.644806	0.153427	4.2027	2.64e-05	0.00010768	CCDC7
ENSG00000124813	66.3355	-1.59256	0.216875	-7.34324	2.08e-13	2e-12	RUNX2		ENSG00000187595	86.5029	0.64509	0.254961	2.53015	0.0114014	0.0279723	ZNF385C
ENSG00000139220	462.282	-1.58174	0.076806	-20.594	3.11e-94	8.84e-92	PPFIA2		ENSG00000214029	465.903	0.645156	0.106886	6.03592	1.58e-09	1.06e-08	ZNF891
ENSG00000104998	138.011	-1.57379	0.164892	-9.54435	1.37e-21	2.28e-20	IL27RA		ENSG00000272316	101.949	0.645382	0.214202	3.01296	0.00258712	0.00744309	AL021368.2
ENSG00000158270	148.77	-1.57224	0.155157	-10.1332	3.94e-24	7.66e-23	COLEC12		ENSG00000178904	1033.77	0.645385	0.0663563	9.72605	2.33e-22	4.06e-21	DPY19L3
ENSG00000120907	13.3995	-1.57095	0.519411	-3.02448	0.00249063	0.00719586	ADRA1A		ENSG00000013375	1893.67	0.645611	0.0565138	11.4239	3.18e-30	8.62e-29	PGM3
ENSG00000109099	183.411	-1.56454	0.133931	-11.6817	1.58e-31	4.6e-30	PMP22		ENSG00000279508	237.125	0.645622	0.174285	3.70439	0.000211897	0.000749813	#N/A
ENSG00000273289	20.3524	-1.55703	0.413068	-3.76943	0.00016362	0.000589117	AL121672.3		ENSG00000239305	878.446	0.645823	0.0677932	9.52636	1.63e-21	2.7e-20	RNF103
ENSG00000198947	190.826	-1.55241	0.143259	-10.8364	2.31e-27	5.4e-26	DMD		ENSG00000180398	3818.9	0.646167	0.0471616	13.7011	1e-42	4.97e-41	MCFD2
ENSG00000153012	60.6123	-1.55172	0.252046	-6.15649	7.44e-10	5.12e-09	LGI2		ENSG00000118217	3323.62	0.64634	0.0535232	12.0759	1.42e-33	4.5e-32	ATF6
ENSG00000260896	45.2989	-1.5485	0.599826	-2.58158	0.00983504	0.0245926	ARLNC1		ENSG00000162927	286.184	0.646723	0.116364	5.55777	2.73e-08	1.61e-07	PUS10
ENSG00000127129	19.9449	-1.54609	0.357033	-4.33039	1.49e-05	6.28e-05	EDN2		ENSG00000144182	102.211	0.646916	0.236136	2.73959	0.00615157	0.0162278	LIPT1
ENSG00000105649	357.388	-1.54498	0.133908	-11.5376	8.53e-31	2.39e-29	RAB3A		ENSG00000168255	491.992	0.647642	0.10749	6.02515	1.69e-09	1.12e-08	POLR2J3
ENSG00000244067	19.7574	-1.5448	0.408883	-3.77811	0.000158025	0.000570084	GSTA2		ENSG00000165338	478.637	0.647698	0.0922877	7.01825	2.25e-12	1.95e-11	HECTD2
ENSG00000237629	10.5814	-1.54467	0.615696	-2.50882	0.0121136	0.0295158	UQCRHP2		ENSG00000235590	42.0727	0.64787	0.252142	2.56946	0.0101857	0.0253352	GNAS-AS1
ENSG00000215452	11.507	-1.53886	0.491116	-3.1334	0.00172795	0.00515856	ZNF663P		ENSG00000135299	125.229	0.648355	0.185727	3.49091	0.00048138	0.00160727	ANKRD6
ENSG00000230918	11.7399	-1.53812	0.60311	-2.55031	0.0107628	0.0265844	AC008063.1		ENSG00000115355	689.504	0.649255	0.095725	6.78251	1.18e-11	9.6e-11	CCDC88A
ENSG00000101955	37.8722	-1.53	0.326585	-4.68486	2.8e-06	1.31e-05	SRPX		ENSG00000223509	129.162	0.649618	0.158876	4.08883	4.34e-05	0.000171703	AC135983.2
ENSG00000185215	373.871	-1.52903	0.089223	-17.1372	7.84e-66	9.54e-64	TNFAIP2		ENSG00000101096	119.747	0.649839	0.152081	4.27298	1.93e-05	8.02e-05	NFATC2
ENSG00000165966	11.2205	-1.52866	0.54645	-2.79744	0.00515097	0.0138562	PDZRN4		ENSG00000145632	111.676	0.649903	0.170798	3.80509	0.000141754	0.000516346	PLK2
ENSG00000205413	18.8211	-1.52865	0.401312	-3.80913	0.000139455	0.000508684	SAMD9		ENSG00000206417	53.6191	0.65016	0.2841	2.28849	0.0221089	0.0498137	H1FX-AS1
ENSG00000277619	24.6135	-1.5246	0.333942	-4.56545	4.98e-06	2.25e-05	AC008406.3		ENSG00000282936	66.1771	0.650484	0.256407	2.53692	0.0111832	0.0274944	AC004706.3
ENSG00000138356	35.3775	-1.52411	0.305244	-4.99309	5.94e-07	3.01e-06	AOX1		ENSG00000103723	89.7707	0.650915	0.201033	3.23786	0.00120431	0.00370941	AP3B2
ENSG00000166803	215.26	-1.52227	0.141825	-10.7334	7.09e-27	1.61e-25	PCLAF		ENSG00000155974	98.5843	0.650954	0.279944	2.3253	0.0200559	0.0458702	GRIP1
ENSG00000172478	2476.68	-1.5161	0.081574	-18.5856	4.2e-77	7.16e-75	MAB21L4		ENSG00000133019	408.277	0.651211	0.0925051	7.03974	1.93e-12	1.68e-11	CHRM3
ENSG00000148082	28.1212	-1.50882	0.298302	-5.05802	4.24e-07	2.18e-06	SHC3		ENSG00000148341	6352.03	0.651507	0.0461041	14.1312	2.44e-45	1.36e-43	SH3GLB2
ENSG00000240065	20.8629	-1.50869	0.377873	-3.9926	6.54e-05	0.000252012	PSMB9		ENSG00000110318	146.409	0.651512	0.1748	3.72718	0.000193633	0.0006898	CEP126
ENSG00000196549	11240	-1.50674	0.0597277	-25.2268	2.03e-140	1.39e-137	MME		ENSG00000257727	215.956	0.652287	0.146904	4.44023	8.99e-06	3.93e-05	CNPY2
ENSG00000162631	28.5116	-1.5066	0.34053	-4.42427	9.68e-06	4.21e-05	NTNG1		ENSG00000139675	139.861	0.652657	0.157231	4.15095	3.31e-05	0.000133436	HNRNPA1L2
ENSG00000179148	83.9951	-1.50548	0.188189	-7.99981	1.25e-15	1.4e-14	ALOXE3		ENSG00000189050	400.881	0.653652	0.107363	6.08823	1.14e-09	7.72e-09	RNFT1
ENSG00000175832	13.784	-1.50184	0.464546	-3.23292	0.00122534	0.00376713	ETV4		ENSG00000204634	622.657	0.653999	0.0908855	7.19586	6.21e-13	5.69e-12	TBC1D8
ENSG00000117877	115.627	-1.4953	0.178175	-8.39234	4.77e-17	5.89e-16	CD3EAP		ENSG00000110274	1673.52	0.654294	0.0545046	12.0044	3.37e-33	1.05e-31	CEP164
ENSG00000166508	6863.84	-1.49289	0.0501476	-29.7699	9.59e-195	2.07e-191	MCM7		ENSG00000163071	300.195	0.654378	0.119959	5.45503	4.9e-08	2.81e-07	SPATA18
ENSG00000279145	11.3431	-1.49159	0.594347	-2.50963	0.0120856	0.0294503	AC011912.1		ENSG00000105048	346.812	0.65438	0.119286	5.4858	4.12e-08	2.38e-07	TNNT1
ENSG00000137507	22.4267	-1.48419	0.383362	-3.8715	0.000108169	0.000401746	LRRC32		ENSG00000104894	166.788	0.655321	0.149112	4.39481	1.11e-05	4.77e-05	CD37
ENSG00000111846	135.6	-1.48284	0.171328	-8.65498	4.93e-18	6.53e-17	GCNT2		ENSG00000261423	50.7316	0.655598	0.254144	2.57963	0.00989058	0.0247055	TMEM202-AS1
ENSG00000241956	5.62236	-1.47282	0.640557	-2.29928	0.0214889	0.0486453	AC109466.1		ENSG00000203965	316.132	0.65564	0.118822	5.51783	3.43e-08	2e-07	EFCAB7
ENSG00000175336	60.0395	-1.47243	0.258637	-5.69303	1.25e-08	7.57e-08	APOF		ENSG00000133401	59.7918	0.655823	0.24585	2.66757	0.00764012	0.0196719	PDZD2
ENSG00000204019	8.81877	-1.46842	0.641099	-2.29048	0.0219935	0.0496185	CT83		ENSG00000077063	56.3849	0.655827	0.254424	2.57769	0.0099462	0.0248157	CTTNBP2
ENSG00000186480	7483.66	-1.4641	0.100584	-14.556	5.35e-48	3.28e-46	INSIG1		ENSG00000250802	211.702	0.65595	0.124415	5.27226	1.35e-07	7.35e-07	ZBED3-AS1
ENSG00000243081	6.9957	-1.46224	0.561225	-2.60543	0.00917579	0.0231251	AC092894.1		ENSG00000185278	1125.67	0.657845	0.0878566	7.48771	7.01e-14	6.93e-13	ZBTB37
ENSG00000261253	15.6931	-1.45651	0.519721	-2.80249	0.00507102	0.0136596	AC137932.2		ENSG00000102904	76.4062	0.657996	0.19882	3.30951	0.000934584	0.0029516	TSNAXIP1
ENSG00000163497	67.9361	-1.45356	0.310659	-4.67895	2.88e-06	1.34e-05	FEV		ENSG00000105136	398.834	0.658088	0.0866522	7.59459	3.09e-14	3.14e-13	ZNF419
ENSG00000258203	8.33551	-1.45226	0.545937	-2.66012	0.00781118	0.0200645	AC004801.5		ENSG00000104213	62.7675	0.65858	0.232884	2.82793	0.00468503	0.0127257	PDGFRL
ENSG00000140945	7.98734	-1.45039	0.569786	-2.54551	0.0109118	0.0269063	CDH13		ENSG00000162989	133.237	0.659022	0.142183	4.63502	3.57e-06	1.64e-05	KCNJ3
ENSG00000130164	1586.02	-1.44553	0.0673301	-21.4693	3.01e-102	1.03e-99	LDLR		ENSG00000239521	234.785	0.659065	0.128599	5.12495	2.98e-07	1.56e-06	CASTOR3
ENSG00000184221	48.1069	-1.44108	0.236154	-6.10227	1.05e-09	7.1e-09	OLIG1		ENSG00000226002	82.2046	0.659247	0.192009	3.43341	0.000596035	0.0019573	GTF2IP14
ENSG00000109084	1849.58	-1.44059	0.0547868	-26.2945	2.21e-152	1.91e-149	TMEM97		ENSG00000139112	1264.85	0.659315	0.057391	11.4881	1.51e-30	4.19e-29	GABARAPL1
ENSG00000169252	69.2441	-1.44014	0.236185	-6.09753	1.08e-09	7.31e-09	ADRB2		ENSG00000102057	59.0337	0.659712	0.247584	2.6646	0.0077079	0.0198268	KCND1
ENSG00000169884	409.478	-1.43374	0.0954259	-15.0246	5.07e-51	3.52e-49	WNT10B		ENSG00000213398	49.0308	0.660118	0.267206	2.47044	0.0134945	0.0325136	LCAT
ENSG00000041353	69.3279	-1.4335	0.203194	-7.05487	1.73e-12	1.52e-11	RAB27B		ENSG00000127603	2815.67	0.660235	0.0694461	9.50715	1.96e-21	3.24e-20	MACF1
ENSG00000110042	58.3617	-1.43135	0.227863	-6.28163	3.35e-10	2.39e-09	DTX4		ENSG00000185246	1473.07	0.660404	0.0572799	11.5294	9.38e-31	2.62e-29	PRPF39
ENSG00000239911	150.828	-1.43109	0.137042	-10.4427	1.58e-25	3.33e-24	PRKAG2-AS1		ENSG00000186088	441.503	0.660519	0.0862841	7.65516	1.93e-14	1.99e-13	GSAP
ENSG00000227589	8.63126	-1.42868	0.569176	-2.51008	0.0120703	0.0294213	AL136528.1		ENSG00000139631	719.458	0.661591	0.0693353	9.54192	1.4e-21	2.33e-20	CSAD
ENSG00000132967	687.896	-1.42659	0.109743	-12.9994	1.23e-38	4.99e-37	HMGB1P5		ENSG00000212694	227.773	0.661689	0.125029	5.29229	1.21e-07	6.63e-07	LINC01089
ENSG00000051596	1417.47	-1.42497	0.0599823	-23.7565	9.42e-125	4.52e-122	THOC3		ENSG00000188994	468.323	0.662581	0.106961	6.19463	5.84e-10	4.06e-09	ZNF292
ENSG00000075223	996.626	-1.42438	0.0762748	-18.6743	8.01e-78	1.39e-75	SEMA3C		ENSG00000140450	790.717	0.664005	0.0814949	8.14781	3.71e-16	4.32e-15	ARRDC4
ENSG00000146674	626.76	-1.42348	0.0710955	-20.0221	3.54e-89	8.33e-87	IGFBP3		ENSG00000235806	52.333	0.664007	0.238971	2.77861	0.00545912	0.0145928	AF241728.1
ENSG00000175318	8.58324	-1.41145	0.600617	-2.35	0.0187732	0.0433265	GRAMD2A		ENSG00000158163	84.606	0.664875	0.278856	2.3843	0.0171119	0.0400199	DZIP1L
ENSG00000092853	569.913	-1.40054	0.114172	-12.267	1.36e-34	4.58e-33	CLSPN		ENSG00000247934	94.4162	0.665568	0.170141	3.91186	9.16e-05	0.000344002	AC022364.1
ENSG00000155849	22.9848	-1.40051	0.487339	-2.8738	0.00405568	0.0111875	ELMO1		ENSG00000097033	2316.94	0.665956	0.0508048	13.1081	2.96e-39	1.24e-37	SH3GLB1
ENSG00000175877	24.4552	-1.39938	0.357865	-3.91034	9.22e-05	0.00034603	TMEM270		ENSG00000214562	68.7411	0.665972	0.230791	2.8856	0.00390665	0.0108271	NUTM2D
ENSG00000173083	105.666	-1.39601	0.166249	-8.39713	4.58e-17	5.67e-16	HPSE		ENSG00000179277	47.1169	0.666295	0.274873	2.42401	0.0153501	0.0363655	MEIS3P1
ENSG00000196230	9743.55	-1.39342	0.0449383	-31.0073	4.3e-211	1.24e-207	TUBB		ENSG00000156273	959.863	0.666728	0.0719528	9.26619	1.93e-20	3e-19	BACH1
ENSG00000102805	634.436	-1.39259	0.0734529	-18.959	3.72e-80	7.1e-78	CLN5		ENSG00000106976	423.926	0.66713	0.107088	6.22972	4.67e-10	3.28e-09	DNM1
ENSG00000106211	17420.3	-1.39163	0.0635851	-21.8861	3.52e-106	1.28e-103	HSPB1		ENSG00000144278	82.6075	0.667318	0.19999	3.33676	0.000847602	0.00270059	GALNT13
ENSG00000105011	920.791	-1.39111	0.064154	-21.684	2.91e-104	1.02e-101	ASF1B		ENSG00000162601	2366	0.668273	0.0525588	12.7148	4.9e-37	1.84e-35	MYSM1
ENSG00000164976	393.713	-1.38945	0.105029	-13.2292	5.95e-40	2.59e-38	MYORG		ENSG00000091262	274.111	0.669419	0.11521	5.8104	6.23e-09	3.91e-08	ABCC6
ENSG00000113657	506.976	-1.38867	0.0966581	-14.3669	8.35e-47	4.9e-45	DPYSL3		ENSG00000196352	1074.09	0.669694	0.0614978	10.8897	1.29e-27	3.07e-26	CD55
ENSG00000155622	9.49318	-1.38692	0.565399	-2.453	0.0141671	0.0339102	XAGE2		ENSG00000133639	1860.65	0.669819	0.0496442	13.4924	1.73e-41	8.23e-40	BTG1
ENSG00000278047	14.1036	-1.38678	0.556514	-2.49191	0.0127059	0.0308139	#N/A		ENSG00000121989	415.897	0.66986	0.091534	7.31815	2.51e-13	2.39e-12	ACVR2A
ENSG00000101003	1164.46	-1.38586	0.0592593	-23.3863	5.89e-121	2.63e-118	GINS1		ENSG00000237438	278.62	0.669873	0.135009	4.96168	6.99e-07	3.51e-06	CECR7
ENSG00000248801	20.0745	-1.38451	0.404453	-3.42316	0.000618985	0.00202625	C8orf34-AS1		ENSG00000214193	548.839	0.66994	0.130826	5.12083	3.04e-07	1.59e-06	SH3D21
ENSG00000158089	160.854	-1.38399	0.142387	-9.71989	2.48e-22	4.3e-21	GALNT14		ENSG00000164845	126.838	0.67012	0.172852	3.87685	0.000105817	0.00039335	FAM86FP
ENSG00000157470	289.472	-1.38226	0.110813	-12.4738	1.04e-35	3.67e-34	FAM81A		ENSG00000253276	791.56	0.670348	0.0829317	8.08313	6.31e-16	7.23e-15	CCDC71L
ENSG00000085840	467.973	-1.37389	0.128289	-10.7093	9.2e-27	2.08e-25	ORC1		ENSG00000204054	6196.2	0.670646	0.0362691	18.4908	2.45e-76	4.02e-74	LINC00963
ENSG00000155962	13.0307	-1.3738	0.498553	-2.75557	0.00585897	0.0155302	CLIC2		ENSG00000255031	42.791	0.670748	0.269737	2.48667	0.0128944	0.0312302	AP002807.1
ENSG00000114790	3696.43	-1.37358	0.0647816	-21.2032	8.91e-100	2.96e-97	ARHGEF26		ENSG00000113318	493.368	0.670794	0.0833357	8.0493	8.33e-16	9.48e-15	MSH3
ENSG00000163293	245.972	-1.37109	0.110335	-12.4267	1.87e-35	6.55e-34	NIPAL1		ENSG00000188825	82.5819	0.671021	0.214794	3.12402	0.00178397	0.00531083	LINC00910
ENSG00000179750	272.25	-1.36846	0.137361	-9.96248	2.22e-23	4.13e-22	APOBEC3B		ENSG00000117859	1276.21	0.671915	0.0611648	10.9853	4.5e-28	1.1e-26	OSBPL9
ENSG00000093009	920.801	-1.36672	0.119384	-11.4481	2.4e-30	6.57e-29	CDC45		ENSG00000261801	390.316	0.672954	0.0989634	6.80002	1.05e-11	8.55e-11	LOXL1-AS1
ENSG00000185432	1265.43	-1.363	0.0587282	-23.2087	3.72e-119	1.61e-116	METTL7A		ENSG00000276141	181.672	0.673254	0.151888	4.43257	9.31e-06	4.06e-05	WHAMMP3
ENSG00000175793	9.52606	-1.3627	0.577696	-2.35886	0.0183311	0.0424346	SFN		ENSG00000152582	182.148	0.67347	0.15152	4.44476	8.8e-06	3.85e-05	SPEF2
ENSG00000167900	3175	-1.36269	0.0734638	-18.5492	8.28e-77	1.4e-74	TK1		ENSG00000114019	396.928	0.674452	0.100116	6.73673	1.62e-11	1.3e-10	AMOTL2
ENSG00000114805	384.661	-1.36169	0.0985768	-13.8134	2.11e-43	1.08e-41	PLCH1		ENSG00000198205	299.916	0.675148	0.110958	6.08471	1.17e-09	7.88e-09	ZXDA
ENSG00000175602	1657.33	-1.36107	0.0683833	-19.9036	3.79e-88	8.69e-86	CCDC85B		ENSG00000274173	1786.73	0.675885	0.0639521	10.5686	4.17e-26	9.07e-25	AL035661.1
ENSG00000231445	15.1757	-1.36042	0.488237	-2.78639	0.00532984	0.0142811	TIMM8AP1		ENSG00000163001	882.359	0.675906	0.0973868	6.94042	3.91e-12	3.31e-11	CFAP36
ENSG00000144959	492.447	-1.35633	0.0812177	-16.7	1.31e-62	1.38e-60	NCEH1		ENSG00000241014	87.4872	0.676061	0.181837	3.71795	0.000200849	0.000713252	AC114490.1
ENSG00000173088	14.1189	-1.3532	0.563155	-2.4029	0.0162658	0.0382622	#N/A		ENSG00000183506	343.672	0.676214	0.104065	6.498	8.14e-11	6.15e-10	PI4KAP2
ENSG00000215158	277.681	-1.35011	0.112574	-11.9931	3.86e-33	1.2e-31	AC138409.2		ENSG00000106610	894.885	0.676915	0.0673714	10.0475	9.42e-24	1.79e-22	STAG3L4
ENSG00000123416	6096.32	-1.34865	0.0672168	-20.0642	1.52e-89	3.61e-87	TUBA1B		ENSG00000177084	3261.56	0.677044	0.063723	10.6248	2.28e-26	5.06e-25	POLE
ENSG00000099194	31655	-1.34614	0.115736	-11.6311	2.87e-31	8.19e-30	SCD		ENSG00000160055	294.199	0.678169	0.117542	5.76958	7.95e-09	4.92e-08	TMEM234
ENSG00000272711	128.328	-1.34363	0.15636	-8.59318	8.46e-18	1.11e-16	AC019069.1		ENSG00000203993	731.851	0.678425	0.0744663	9.1105	8.2e-20	1.21e-18	ARRDC1-AS1
ENSG00000172731	1159.6	-1.33862	0.0688461	-19.4436	3.3e-84	6.73e-82	LRRC20		ENSG00000132950	679.17	0.678641	0.0725823	9.34995	8.77e-21	1.39e-19	ZMYM5
ENSG00000126267	2897.14	-1.33432	0.0675603	-19.75	8.02e-87	1.72e-84	COX6B1		ENSG00000173517	279.664	0.678908	0.155967	4.3529	1.34e-05	5.71e-05	PEAK1
ENSG00000126246	25.7936	-1.3335	0.368669	-3.61706	0.000297973	0.00102924	IGFLR1		ENSG00000268350	38.7828	0.679356	0.274098	2.47852	0.013193	0.0318701	FAM156A
ENSG00000085999	461.247	-1.3324	0.100301	-13.284	2.87e-40	1.27e-38	RAD54L		ENSG00000106460	1497.81	0.679379	0.0721816	9.41208	4.86e-21	7.85e-20	TMEM106B
ENSG00000137404	207.589	-1.32893	0.155742	-8.53291	1.43e-17	1.83e-16	NRM		ENSG00000226824	92.2743	0.679535	0.236703	2.87083	0.00409396	0.0112786	AC006001.2
ENSG00000101412	1253.89	-1.32888	0.0913925	-14.5403	6.73e-48	4.1e-46	E2F1		ENSG00000072195	246.663	0.679745	0.133634	5.08663	3.64e-07	1.9e-06	SPEG
ENSG00000127824	1805.04	-1.32692	0.0505886	-26.2295	1.22e-151	9.61e-149	TUBA4A		ENSG00000107105	98.1627	0.68084	0.27549	2.47138	0.0134592	0.0324356	ELAVL2
ENSG00000170089	577.057	-1.3229	0.0821903	-16.0956	2.74e-58	2.53e-56	AC106795.1		ENSG00000106479	1104.88	0.682067	0.0563082	12.1131	9e-34	2.9e-32	ZNF862
ENSG00000255051	29.6776	-1.32195	0.306468	-4.31351	1.61e-05	6.76e-05	BCAS2P1		ENSG00000174428	673.879	0.682135	0.107694	6.33401	2.39e-10	1.73e-09	GTF2IRD2B
ENSG00000065989	93.8002	-1.32131	0.188733	-7.00094	2.54e-12	2.2e-11	PDE4A		ENSG00000145685	156.445	0.682698	0.17272	3.95262	7.73e-05	0.000294003	LHFPL2
ENSG00000181467	2613.74	-1.32051	0.0430753	-30.6558	2.21e-206	5.72e-203	RAP2B		ENSG00000186889	52.9534	0.68289	0.286799	2.38107	0.0172622	0.0403096	TMEM17
ENSG00000113721	48.9008	-1.31986	0.293364	-4.49906	6.83e-06	3.03e-05	PDGFRB		ENSG00000249574	71.6036	0.683721	0.188476	3.62762	0.000286043	0.000990675	AC226118.1
ENSG00000165244	507.497	-1.31384	0.101278	-12.9726	1.75e-38	7.05e-37	ZNF367		ENSG00000178803	70.6271	0.684126	0.260779	2.62339	0.00870596	0.0220763	ADORA2A-AS1
ENSG00000147155	1756.46	-1.31095	0.0522993	-25.0664	1.16e-138	7.5e-136	EBP		ENSG00000089091	110.002	0.684586	0.17143	3.99338	6.51e-05	0.000251217	DZANK1
ENSG00000274209	25.0608	-1.30437	0.361846	-3.60478	0.000312418	0.0010747	ANTXRL		ENSG00000204791	53.0175	0.685041	0.297469	2.3029	0.0212845	0.0482415	SMPD5
ENSG00000234648	20.4423	-1.29909	0.407619	-3.18702	0.00143746	0.00435864	AL162151.2		ENSG00000184343	129.185	0.685115	0.153044	4.47658	7.58e-06	3.35e-05	SRPK3
ENSG00000132763	944.189	-1.29369	0.0596405	-21.6914	2.47e-104	8.77e-102	MMACHC		ENSG00000268516	111.315	0.685692	0.193621	3.54142	0.000397979	0.00134703	AC020915.2
ENSG00000205208	533.243	-1.29191	0.090482	-14.2781	3e-46	1.72e-44	C4orf46		ENSG00000167994	579.904	0.687237	0.09554	7.19319	6.33e-13	5.8e-12	RAB3IL1
ENSG00000011332	169.472	-1.29172	0.145016	-8.90741	5.22e-19	7.38e-18	DPF1		ENSG00000150403	3333.26	0.688465	0.0534155	12.8889	5.2e-38	2.05e-36	TMCO3
ENSG00000249082	46.9263	-1.29022	0.231566	-5.57173	2.52e-08	1.49e-07	C5orf66-AS1		ENSG00000135269	6868.48	0.688751	0.0333716	20.6388	1.23e-94	3.54e-92	TES
ENSG00000134240	5645.04	-1.28877	0.0817164	-15.7713	4.91e-56	4.14e-54	HMGCS2		ENSG00000175544	440.273	0.689076	0.0879871	7.83155	4.82e-15	5.19e-14	CABP4
ENSG00000171421	720.336	-1.28825	0.0930266	-13.8482	1.3e-43	6.76e-42	MRPL36		ENSG00000247595	38.4585	0.689349	0.294236	2.34284	0.0191374	0.044065	SPTY2D1OS
ENSG00000101282	26.0208	-1.28624	0.377056	-3.41128	0.000646579	0.00211124	RSPO4		ENSG00000131401	50.3893	0.689787	0.247948	2.78198	0.00540289	0.0144603	NAPSB
ENSG00000183690	13.4184	-1.28406	0.451875	-2.84164	0.00448823	0.0122489	EFHC2		ENSG00000100478	207.967	0.690123	0.15881	4.34558	1.39e-05	5.89e-05	AP4S1
ENSG00000226887	336.799	-1.28357	0.120623	-10.6411	1.92e-26	4.28e-25	ERVMER34-1		ENSG00000182287	680.543	0.69044	0.0871388	7.92345	2.31e-15	2.55e-14	AP1S2
ENSG00000169860	285.823	-1.27997	0.144048	-8.88577	6.35e-19	8.9e-18	P2RY1		ENSG00000273033	151.363	0.690512	0.16377	4.21634	2.48e-05	0.000101818	LINC02035
ENSG00000148700	5539.22	-1.27507	0.045392	-28.0902	1.29e-173	1.52e-170	ADD3		ENSG00000104899	283.993	0.690715	0.105816	6.5275	6.69e-11	5.1e-10	AMH
ENSG00000232456	9.44669	-1.27285	0.54495	-2.33572	0.0195059	0.0447703	AL355994.2		ENSG00000140859	155.992	0.690732	0.20438	3.37965	0.000725789	0.00234214	KIFC3
ENSG00000027869	143.569	-1.27145	0.18947	-6.71056	1.94e-11	1.55e-10	SH2D2A		ENSG00000130558	102.156	0.691088	0.191192	3.61463	0.000300777	0.00103824	OLFM1
ENSG00000274956	15.6637	-1.27044	0.446981	-2.84228	0.00447926	0.0122296	NKAIN3-IT1		ENSG00000260572	70.1248	0.691089	0.183018	3.77607	0.000159323	0.000574526	AC069224.1
ENSG00000189221	10109.5	-1.26992	0.0438324	-28.9722	1.47e-184	2.55e-181	MAOA		ENSG00000184465	798.596	0.691404	0.0911976	7.58139	3.42e-14	3.46e-13	WDR27
ENSG00000071539	1063.9	-1.26878	0.0656212	-19.3349	2.73e-83	5.36e-81	TRIP13		ENSG00000114861	1120.35	0.691769	0.0747026	9.2603	2.04e-20	3.17e-19	FOXP1
ENSG00000168496	1657.87	-1.26856	0.0694548	-18.2645	1.59e-74	2.39e-72	FEN1		ENSG00000236144	358.676	0.69197	0.12855	5.38289	7.33e-08	4.13e-07	TMEM147-AS1
ENSG00000065325	43.3966	-1.26743	0.30004	-4.22419	2.4e-05	9.85e-05	GLP2R		ENSG00000169228	720.018	0.692417	0.0688838	10.052	9.01e-24	1.72e-22	RAB24
ENSG00000096006	20.5165	-1.26578	0.537695	-2.35408	0.0185684	0.0429073	CRISP3		ENSG00000261663	60.1297	0.692671	0.276772	2.50268	0.0123258	0.0300018	AC009065.8
ENSG00000075651	77.1551	-1.26409	0.211441	-5.97848	2.25e-09	1.48e-08	PLD1		ENSG00000177189	3145.4	0.692851	0.0465854	14.8727	4.96e-50	3.27e-48	RPS6KA3
ENSG00000010270	924.091	-1.26404	0.0758585	-16.6631	2.43e-62	2.5e-60	STARD3NL		ENSG00000169758	146.872	0.693227	0.155337	4.46274	8.09e-06	3.56e-05	TMEM266
ENSG00000175643	371.716	-1.26343	0.112994	-11.1813	5.03e-29	1.28e-27	RMI2		ENSG00000063180	172.116	0.693534	0.177654	3.90384	9.47e-05	0.000354898	CA11
ENSG00000072274	7152.69	-1.26227	0.0514285	-24.5442	4.99e-133	2.81e-130	TFRC		ENSG00000204659	58.5545	0.694704	0.25921	2.68008	0.00736049	0.0190238	CBY3
ENSG00000137124	2923.48	-1.26164	0.0436825	-28.882	2.01e-183	3.25e-180	ALDH1B1		ENSG00000140398	587.445	0.695109	0.0769284	9.03579	1.63e-19	2.36e-18	NEIL1
ENSG00000075886	351.762	-1.25495	0.127022	-9.87978	5.09e-23	9.25e-22	TUBA3D		ENSG00000127419	571.645	0.695272	0.0918536	7.56935	3.75e-14	3.78e-13	TMEM175
ENSG00000101311	302.343	-1.25311	0.102146	-12.2678	1.35e-34	4.54e-33	FERMT1		ENSG00000273329	344.766	0.69554	0.116402	5.97534	2.3e-09	1.51e-08	AC078846.1
ENSG00000148459	446.49	-1.24933	0.0895339	-13.9538	2.98e-44	1.58e-42	PDSS1		ENSG00000147459	889.928	0.695568	0.0749957	9.27477	1.78e-20	2.78e-19	DOCK5
ENSG00000185745	24.0413	-1.24679	0.377064	-3.30657	0.000944443	0.00297983	IFIT1		ENSG00000114446	831.116	0.695849	0.09149	7.60574	2.83e-14	2.89e-13	IFT57
ENSG00000267909	15.9427	-1.24541	0.42795	-2.91018	0.00361224	0.0100738	CCDC177		ENSG00000188313	192.092	0.696495	0.170268	4.09057	4.3e-05	0.000170547	PLSCR1
ENSG00000214182	135.412	-1.24301	0.207961	-5.97713	2.27e-09	1.49e-08	PTMAP5		ENSG00000282508	68.7497	0.696519	0.251076	2.77413	0.00553488	0.0147724	LINC01002
ENSG00000178531	1110.62	-1.24139	0.110108	-11.2743	1.76e-29	4.59e-28	CTXN1		ENSG00000056277	448.761	0.697056	0.11021	6.32478	2.54e-10	1.83e-09	ZNF280C
ENSG00000270299	12.1716	-1.23936	0.444838	-2.7861	0.00533469	0.0142926	AL121758.1		ENSG00000173681	324.801	0.697244	0.110891	6.28768	3.22e-10	2.3e-09	BCLAF3
ENSG00000169684	123.819	-1.23858	0.159652	-7.75798	8.63e-15	9.12e-14	CHRNA5		ENSG00000125772	702.748	0.697801	0.0794197	8.78625	1.55e-18	2.12e-17	GPCPD1
ENSG00000242110	433.235	-1.2372	0.0889247	-13.9129	5.29e-44	2.76e-42	AMACR		ENSG00000183401	397.633	0.698277	0.0973826	7.17045	7.48e-13	6.79e-12	CCDC159
ENSG00000134215	73.6279	-1.23603	0.206134	-5.99626	2.02e-09	1.33e-08	VAV3		ENSG00000187017	356.919	0.698384	0.102856	6.78992	1.12e-11	9.15e-11	ESPN
ENSG00000131462	2241.52	-1.23233	0.046903	-26.2741	3.8e-152	3.17e-149	TUBG1		ENSG00000180376	411.94	0.698626	0.100459	6.95432	3.54e-12	3.02e-11	CCDC66
ENSG00000185519	88.492	-1.23123	0.213963	-5.75442	8.69e-09	5.36e-08	FAM131C		ENSG00000139537	66.0112	0.698626	0.251278	2.78029	0.00543109	0.0145253	CCDC65
ENSG00000185885	113.832	-1.23026	0.153895	-7.9941	1.31e-15	1.46e-14	IFITM1		ENSG00000100625	1079.32	0.698731	0.0646847	10.8021	3.36e-27	7.8e-26	SIX4
ENSG00000256209	19.1835	-1.23023	0.390415	-3.15109	0.00162662	0.00488534	AC073578.1		ENSG00000224975	52.066	0.698775	0.245867	2.84208	0.004482	0.0122345	INE1
ENSG00000224269	13.7042	-1.22881	0.464267	-2.64678	0.0081261	0.0207849	AP000697.1		ENSG00000166049	831.112	0.700518	0.0643132	10.8923	1.25e-27	2.99e-26	PASD1
ENSG00000100739	10.326	-1.22675	0.44311	-2.76851	0.00563136	0.014999	BDKRB1		ENSG00000245149	45.7789	0.703212	0.266381	2.63987	0.0082937	0.0211405	RNF139-AS1
ENSG00000051180	434.746	-1.22581	0.106577	-11.5017	1.29e-30	3.59e-29	RAD51		ENSG00000117569	498.451	0.703248	0.10959	6.41708	1.39e-10	1.03e-09	PTBP2
ENSG00000184992	1730.74	-1.2251	0.0489063	-25.0499	1.75e-138	1.11e-135	BRI3BP		ENSG00000224699	90.2109	0.703629	0.210564	3.34164	0.000832857	0.00265884	LAMTOR5-AS1
ENSG00000226415	34.9063	-1.2246	0.281079	-4.35679	1.32e-05	5.62e-05	TPI1P1		ENSG00000230487	224.892	0.703732	0.151667	4.63999	3.48e-06	1.6e-05	PSMG3-AS1
ENSG00000106268	324.014	-1.21965	0.118973	-10.2514	1.17e-24	2.35e-23	NUDT1		ENSG00000044574	31570	0.704136	0.0474395	14.8428	7.74e-50	5.07e-48	HSPA5
ENSG00000254598	13.8472	-1.21621	0.515955	-2.3572	0.0184135	0.0425912	CSNK2A3		ENSG00000158406	799.83	0.704194	0.0956326	7.36354	1.79e-13	1.72e-12	HIST1H4H
ENSG00000231566	11.7304	-1.21598	0.52067	-2.33541	0.0195222	0.0447997	LINC02595		ENSG00000196757	219.175	0.704465	0.140047	5.0302	4.9e-07	2.51e-06	ZNF700
ENSG00000163536	69.0728	-1.21506	0.236634	-5.13479	2.82e-07	1.49e-06	SERPINI1		ENSG00000108797	162.806	0.704474	0.147522	4.7754	1.79e-06	8.58e-06	CNTNAP1
ENSG00000102393	647.478	-1.21372	0.077717	-15.6172	5.56e-55	4.52e-53	GLA		ENSG00000134884	2059.65	0.704878	0.0661652	10.6533	1.68e-26	3.76e-25	ARGLU1
ENSG00000170293	198.232	-1.21368	0.145469	-8.34324	7.23e-17	8.83e-16	CMTM8		ENSG00000144045	155.248	0.706834	0.149678	4.72237	2.33e-06	1.1e-05	DQX1
ENSG00000070526	2382.18	-1.21313	0.0670793	-18.085	4.18e-73	6.05e-71	ST6GALNAC1		ENSG00000116584	4619.09	0.707609	0.0459587	15.3966	1.72e-53	1.31e-51	ARHGEF2
ENSG00000198618	1809.72	-1.21213	0.129442	-9.36427	7.66e-21	1.22e-19	PPIAP22		ENSG00000185522	331.076	0.707735	0.114719	6.16928	6.86e-10	4.74e-09	LMNTD2
ENSG00000206113	16.4259	-1.20817	0.513878	-2.35108	0.018719	0.0432168	CFAP99		ENSG00000242294	484.997	0.707949	0.139238	5.08446	3.69e-07	1.92e-06	STAG3L5P
ENSG00000156218	130.802	-1.20646	0.177013	-6.81564	9.38e-12	7.71e-11	ADAMTSL3		ENSG00000204852	698.503	0.708703	0.0813914	8.70734	3.11e-18	4.18e-17	TCTN1
ENSG00000169683	1305.51	-1.20395	0.0812793	-14.8125	1.22e-49	7.86e-48	LRRC45		ENSG00000198466	631.517	0.708708	0.0804949	8.80438	1.32e-18	1.81e-17	ZNF587
ENSG00000071575	103.584	-1.20147	0.220896	-5.43908	5.36e-08	3.06e-07	TRIB2		ENSG00000253878	35.1781	0.708932	0.293757	2.41333	0.0158075	0.0373196	AC087752.3
ENSG00000176204	23.5084	-1.20079	0.355821	-3.3747	0.000738965	0.00238258	LRRTM4		ENSG00000148444	221.555	0.710382	0.141185	5.03157	4.86e-07	2.49e-06	COMMD3
ENSG00000164742	690.805	-1.19818	0.0895321	-13.3827	7.63e-41	3.48e-39	ADCY1		ENSG00000072210	8048.5	0.710597	0.0315147	22.5481	1.4e-112	5.59e-110	ALDH3A2
ENSG00000094804	1858.81	-1.19485	0.0707431	-16.89	5.33e-64	6.03e-62	CDC6		ENSG00000143816	165.643	0.710665	0.145883	4.87146	1.11e-06	5.44e-06	WNT9A
ENSG00000149798	218.317	-1.19337	0.125676	-9.49557	2.19e-21	3.6e-20	CDC42EP2		ENSG00000176014	352.116	0.71076	0.112466	6.31976	2.62e-10	1.89e-09	TUBB6
ENSG00000139988	23.7825	-1.19263	0.37891	-3.14752	0.00164664	0.00493972	RDH12		ENSG00000136052	463.51	0.71125	0.0974448	7.299	2.9e-13	2.73e-12	SLC41A2
ENSG00000171320	365.976	-1.19195	0.105734	-11.2731	1.78e-29	4.64e-28	ESCO2		ENSG00000269896	139.223	0.711649	0.160886	4.42331	9.72e-06	4.22e-05	AL513477.1
ENSG00000265158	34.6241	-1.19144	0.294765	-4.042	5.3e-05	0.000207101	LRRC37A7P		ENSG00000145819	1090.67	0.712353	0.0682014	10.4448	1.55e-25	3.25e-24	ARHGAP26
ENSG00000228594	1771.29	-1.1912	0.14253	-8.35756	6.4e-17	7.84e-16	FNDC10		ENSG00000152192	412.078	0.712991	0.115391	6.1789	6.46e-10	4.47e-09	POU4F1
ENSG00000179023	11.2505	-1.18926	0.495895	-2.39821	0.0164756	0.0386958	KLHDC7A		ENSG00000276550	1079.46	0.713311	0.0665368	10.7206	8.15e-27	1.85e-25	HERC2P2
ENSG00000179841	765.538	-1.18893	0.0903937	-13.1528	1.64e-39	6.99e-38	AKAP5		ENSG00000164418	80.4556	0.713375	0.215994	3.30275	0.000957426	0.00301565	GRIK2
ENSG00000242082	27.8448	-1.18886	0.323091	-3.67963	0.000233569	0.000820785	SLC5A4-AS1		ENSG00000196268	206.461	0.713407	0.12804	5.57175	2.52e-08	1.49e-07	ZNF493
ENSG00000215246	94.5669	-1.18864	0.167731	-7.08656	1.37e-12	1.22e-11	AC116351.1		ENSG00000066735	374.738	0.713842	0.144226	4.94946	7.44e-07	3.73e-06	KIF26A
ENSG00000112118	3119.36	-1.18808	0.0472698	-25.1341	2.11e-139	1.4e-136	MCM3		ENSG00000278970	685.395	0.713994	0.0809357	8.82175	1.13e-18	1.56e-17	HEIH
ENSG00000153395	2922.44	-1.18419	0.0573723	-20.6404	1.19e-94	3.47e-92	LPCAT1		ENSG00000143195	58.5974	0.714184	0.286468	2.49306	0.0126646	0.0307312	ILDR2
ENSG00000141526	4409.69	-1.1834	0.052179	-22.6796	7.12e-114	2.93e-111	SLC16A3		ENSG00000274471	90.4111	0.714803	0.183079	3.90434	9.45e-05	0.000354261	AC242376.2
ENSG00000152969	127.264	-1.18159	0.174248	-6.78107	1.19e-11	9.69e-11	JAKMIP1		ENSG00000132680	1714.18	0.714988	0.063976	11.1759	5.35e-29	1.35e-27	KHDC4
ENSG00000087128	48.3227	-1.1813	0.318011	-3.71464	0.000203491	0.00072204	TMPRSS11E		ENSG00000173295	188.998	0.715238	0.136428	5.2426	1.58e-07	8.57e-07	FAM86B3P
ENSG00000109255	226.901	-1.17925	0.141632	-8.32616	8.35e-17	1.02e-15	NMU		ENSG00000230074	56.6614	0.715995	0.283546	2.52514	0.0115651	0.0283259	AL162231.2
ENSG00000185274	12.5232	-1.17718	0.426237	-2.76181	0.00574826	0.015268	GALNT17		ENSG00000064270	1996.1	0.717155	0.060229	11.9071	1.09e-32	3.32e-31	ATP2C2
ENSG00000158315	55.9937	-1.17527	0.216842	-5.41991	5.96e-08	3.39e-07	RHBDL2		ENSG00000172167	361.391	0.717513	0.12605	5.6923	1.25e-08	7.6e-08	MTBP
ENSG00000104889	1194.26	-1.17466	0.0712277	-16.4916	4.22e-61	4.19e-59	RNASEH2A		ENSG00000183098	280.421	0.71811	0.133679	5.37189	7.79e-08	4.37e-07	GPC6
ENSG00000132646	2960.33	-1.17438	0.057364	-20.4725	3.79e-93	1.02e-90	PCNA		ENSG00000031081	71.0536	0.718205	0.264847	2.71177	0.00669243	0.017482	ARHGAP31
ENSG00000217716	15.4885	-1.17297	0.458094	-2.56055	0.0104507	0.0258954	RPS10P3		ENSG00000065665	395.09	0.718761	0.100593	7.14522	8.99e-13	8.11e-12	SEC61A2
ENSG00000124216	46.7214	-1.17261	0.265459	-4.41728	1e-05	4.33e-05	SNAI1		ENSG00000113742	1308.72	0.718912	0.0573627	12.5327	4.94e-36	1.77e-34	CPEB4
ENSG00000153162	69.3713	-1.17158	0.256897	-4.5605	5.1e-06	2.3e-05	BMP6		ENSG00000212123	83.3799	0.719529	0.198364	3.62731	0.000286385	0.000991727	PRR22
ENSG00000117450	10109.2	-1.17065	0.0627769	-18.6478	1.32e-77	2.27e-75	PRDX1		ENSG00000138678	113.641	0.719709	0.188365	3.82081	0.000133013	0.000486351	GPAT3
ENSG00000257950	29.6767	-1.16877	0.33589	-3.47963	0.0005021	0.0016715	P2RX5-TAX1BP3		ENSG00000167615	2497.65	0.719785	0.0691585	10.4078	2.29e-25	4.75e-24	LENG8
ENSG00000109576	1033.6	-1.16795	0.061874	-18.8762	1.79e-79	3.24e-77	AADAT		ENSG00000186310	144.084	0.719971	0.178626	4.0306	5.56e-05	0.000216859	NAP1L3
ENSG00000156689	19.505	-1.1648	0.325489	-3.57862	0.000345412	0.00118051	GLYATL2		ENSG00000183604	60.46	0.720479	0.283432	2.54198	0.0110225	0.0271533	SMG1P5
ENSG00000183688	1117.9	-1.16395	0.0679968	-17.1178	1.09e-65	1.32e-63	RFLNB		ENSG00000250132	128.057	0.721035	0.17506	4.11878	3.81e-05	0.000152007	AC004803.1
ENSG00000177602	356.319	-1.16356	0.107941	-10.7796	4.3e-27	9.92e-26	HASPIN		ENSG00000023287	2082.85	0.721066	0.0633094	11.3896	4.71e-30	1.26e-28	RB1CC1
ENSG00000129521	429.728	-1.16119	0.127077	-9.13765	6.38e-20	9.54e-19	EGLN3		ENSG00000271576	46.8134	0.721752	0.307941	2.3438	0.0190883	0.0439676	AL359504.2
ENSG00000100297	1686.32	-1.16056	0.0721503	-16.0853	3.23e-58	2.96e-56	MCM5		ENSG00000101017	102.92	0.721753	0.201901	3.57478	0.00035052	0.00119639	CD40
ENSG00000141560	847.258	-1.15948	0.0778771	-14.8886	3.91e-50	2.6e-48	FN3KRP		ENSG00000131730	40.0784	0.72194	0.276241	2.61345	0.00896338	0.0226492	CKMT2
ENSG00000180739	25.1045	-1.15709	0.328364	-3.52379	0.000425422	0.0014341	S1PR5		ENSG00000182175	143.816	0.72226	0.211629	3.41287	0.000642836	0.00210008	RGMA
ENSG00000178538	113.953	-1.15476	0.198097	-5.82927	5.57e-09	3.51e-08	CA8		ENSG00000143515	1265.86	0.72324	0.0643903	11.2321	2.84e-29	7.31e-28	ATP8B2
ENSG00000162981	49.1554	-1.15359	0.222476	-5.18521	2.16e-07	1.15e-06	LRATD1		ENSG00000118939	88.6801	0.723275	0.209325	3.45528	0.000549728	0.00181466	UCHL3
ENSG00000131389	191.118	-1.15321	0.168488	-6.84445	7.68e-12	6.35e-11	SLC6A6		ENSG00000121350	413.131	0.723621	0.0955784	7.57097	3.7e-14	3.74e-13	PYROXD1
ENSG00000179403	2106.31	-1.14791	0.068604	-16.7324	7.61e-63	8.15e-61	VWA1		ENSG00000165125	788.259	0.72415	0.0722366	10.0247	1.19e-23	2.24e-22	TRPV6
ENSG00000235363	39.6697	-1.14464	0.403176	-2.83905	0.00452478	0.0123331	SNRPGP10		ENSG00000197818	863.918	0.724394	0.0741116	9.77437	1.45e-22	2.57e-21	SLC9A8
ENSG00000166963	113.195	-1.14174	0.212408	-5.37524	7.65e-08	4.29e-07	MAP1A		ENSG00000083535	417.337	0.725176	0.127585	5.68387	1.32e-08	7.97e-08	PIBF1
ENSG00000169562	43.7632	-1.14147	0.289274	-3.94599	7.95e-05	0.000301603	GJB1		ENSG00000198915	101.267	0.725403	0.31042	2.33684	0.0194473	0.0446694	RASGEF1A
ENSG00000164850	220.726	-1.14112	0.128126	-8.90622	5.28e-19	7.45e-18	GPER1		ENSG00000198919	540.492	0.725532	0.0836469	8.67374	4.18e-18	5.56e-17	DZIP3
ENSG00000228232	67.3211	-1.14103	0.27484	-4.15161	3.3e-05	0.000133089	GAPDHP1		ENSG00000224086	121.274	0.726274	0.19075	3.80747	0.000140394	0.000511822	AC245452.1
ENSG00000111859	93.0677	-1.13896	0.176639	-6.44798	1.13e-10	8.46e-10	NEDD9		ENSG00000115977	1082.98	0.727033	0.0694252	10.4722	1.16e-25	2.46e-24	AAK1
ENSG00000188191	955.999	-1.13895	0.0620843	-18.3453	3.6e-75	5.69e-73	PRKAR1B		ENSG00000274290	95.4278	0.727201	0.19845	3.6644	0.000247917	0.000868145	HIST1H2BE
ENSG00000136689	19.0418	-1.13798	0.388285	-2.9308	0.00338094	0.00949088	IL1RN		ENSG00000053702	127.779	0.72723	0.170555	4.26389	2.01e-05	8.34e-05	NRIP2
ENSG00000263427	67.4396	-1.13782	0.249084	-4.56803	4.92e-06	2.23e-05	AC129492.2		ENSG00000102870	707.157	0.727398	0.0855617	8.50145	1.87e-17	2.39e-16	ZNF629
ENSG00000249565	16.0969	-1.13722	0.464408	-2.44874	0.0143355	0.0342685	SERBP1P5		ENSG00000198888	54331.7	0.727669	0.162068	4.48989	7.13e-06	3.16e-05	MT-ND1
ENSG00000138821	1829.76	-1.13718	0.0537644	-21.1512	2.69e-99	8.82e-97	SLC39A8		ENSG00000250159	40.2137	0.72768	0.266964	2.72576	0.00641531	0.0168464	AC106791.1
ENSG00000163631	11.888	-1.13589	0.427281	-2.65841	0.00785099	0.0201548	ALB		ENSG00000155313	1802.09	0.728137	0.0671278	10.847	2.06e-27	4.82e-26	USP25
ENSG00000168952	102.858	-1.13455	0.183848	-6.17112	6.78e-10	4.69e-09	STXBP6		ENSG00000179361	416.342	0.728711	0.120641	6.04034	1.54e-09	1.03e-08	ARID3B
ENSG00000101057	3232.89	-1.12909	0.075896	-14.8768	4.66e-50	3.08e-48	MYBL2		ENSG00000276180	559.456	0.728741	0.088117	8.27016	1.34e-16	1.61e-15	HIST1H4I
ENSG00000273980	25.7178	-1.12805	0.376765	-2.99403	0.00275317	0.00786493	AL592071.1		ENSG00000124762	2759.15	0.728948	0.0459924	15.8493	1.42e-56	1.22e-54	CDKN1A
ENSG00000215492	24.1097	-1.128	0.350565	-3.21766	0.00129243	0.00395453	HNRNPA1P7		ENSG00000244754	4695.38	0.729795	0.0425005	17.1714	4.35e-66	5.36e-64	N4BP2L2
ENSG00000073578	5800.57	-1.12616	0.0329538	-34.1739	5.9e-256	7.65e-252	SDHA		ENSG00000105982	309.264	0.729817	0.12189	5.98748	2.13e-09	1.4e-08	RNF32
ENSG00000154102	104.379	-1.12576	0.172739	-6.51714	7.17e-11	5.45e-10	C16orf74		ENSG00000198520	38.1773	0.730362	0.281043	2.59875	0.0093564	0.0235254	ARMH1
ENSG00000170745	232.605	-1.12464	0.107777	-10.435	1.72e-25	3.6e-24	KCNS3		ENSG00000215908	519.193	0.730748	0.111693	6.54249	6.05e-11	4.63e-10	CROCCP2
ENSG00000251003	125.783	-1.12126	0.160933	-6.96722	3.23e-12	2.76e-11	ZFPM2-AS1		ENSG00000088340	112.428	0.731609	0.188386	3.88356	0.000102938	0.000383473	FER1L4
ENSG00000163898	35.4088	-1.11925	0.296167	-3.77911	0.00015739	0.000567869	LIPH		ENSG00000130635	347.512	0.731816	0.110619	6.61566	3.7e-11	2.89e-10	COL5A1
ENSG00000165084	37.8972	-1.11758	0.454827	-2.45715	0.0140044	0.0335642	C8orf34		ENSG00000258890	1010.12	0.73189	0.0629345	11.6294	2.92e-31	8.35e-30	CEP95
ENSG00000184675	599.151	-1.11276	0.0778128	-14.3004	2.17e-46	1.25e-44	AMER1		ENSG00000143409	201.214	0.73202	0.148506	4.92923	8.26e-07	4.12e-06	MINDY1
ENSG00000128045	49.207	-1.11184	0.253535	-4.38533	1.16e-05	4.97e-05	RASL11B		ENSG00000197702	287.405	0.732037	0.138464	5.28683	1.24e-07	6.82e-07	PARVA
ENSG00000003436	139.435	-1.11017	0.200005	-5.55071	2.85e-08	1.67e-07	TFPI		ENSG00000124224	162.317	0.732602	0.171393	4.2744	1.92e-05	7.97e-05	PPP4R1L
ENSG00000166002	1139.57	-1.11003	0.102508	-10.8288	2.52e-27	5.86e-26	SMCO4		ENSG00000261824	1001.44	0.733705	0.0597564	12.2783	1.19e-34	4e-33	LINC00662
ENSG00000121152	958.607	-1.10989	0.0719165	-15.433	9.82e-54	7.48e-52	NCAPH		ENSG00000196730	485.889	0.733734	0.0797299	9.20274	3.49e-20	5.31e-19	DAPK1
ENSG00000137216	1534.95	-1.10894	0.0731969	-15.1501	7.57e-52	5.42e-50	TMEM63B		ENSG00000234741	10823.2	0.734434	0.0621316	11.8206	3.05e-32	9.14e-31	GAS5
ENSG00000136943	375.742	-1.1073	0.0904556	-12.2414	1.87e-34	6.21e-33	CTSV		ENSG00000203896	107.885	0.735246	0.199842	3.67914	0.000234021	0.00082221	LIME1
ENSG00000169710	60555	-1.10463	0.13051	-8.46396	2.58e-17	3.27e-16	FASN		ENSG00000253404	66.3859	0.735468	0.239141	3.07545	0.00210184	0.00617516	AC034243.1
ENSG00000069702	421.385	-1.1046	0.0851665	-12.9699	1.81e-38	7.3e-37	TGFBR3		ENSG00000226419	308.289	0.735744	0.162601	4.52483	6.04e-06	2.7e-05	SLC16A1-AS1
ENSG00000231389	21.9883	-1.10057	0.381636	-2.88381	0.00392898	0.0108808	HLA-DPA1		ENSG00000137070	119.852	0.735814	0.189768	3.87744	0.000105562	0.000392628	IL11RA
ENSG00000065057	533.458	-1.0989	0.0845107	-13.0031	1.18e-38	4.77e-37	NTHL1		ENSG00000165521	89.9607	0.736668	0.206937	3.55987	0.000371038	0.00126244	EML5
ENSG00000013619	108.528	-1.0989	0.204641	-5.36988	7.88e-08	4.41e-07	MAMLD1		ENSG00000083290	995.613	0.736811	0.0657598	11.2046	3.87e-29	9.92e-28	ULK2
ENSG00000086506	167.532	-1.09853	0.155327	-7.07238	1.52e-12	1.34e-11	HBQ1		ENSG00000188385	543.142	0.737009	0.0864517	8.52509	1.53e-17	1.95e-16	JAKMIP3
ENSG00000110328	304.906	-1.09812	0.109815	-9.99977	1.53e-23	2.86e-22	GALNT18		ENSG00000174099	274.193	0.737128	0.120395	6.1226	9.21e-10	6.28e-09	MSRB3
ENSG00000139438	413.868	-1.09808	0.100347	-10.9428	7.2e-28	1.73e-26	FAM222A		ENSG00000163629	2521.8	0.737329	0.050852	14.4995	1.22e-47	7.39e-46	PTPN13
ENSG00000156136	683.154	-1.09789	0.0736827	-14.9002	3.29e-50	2.19e-48	DCK		ENSG00000198453	91.9263	0.737941	0.220385	3.34842	0.000812749	0.00260042	ZNF568
ENSG00000076248	2134.28	-1.09643	0.0417724	-26.2478	7.56e-152	6.13e-149	UNG		ENSG00000197102	9414.11	0.738515	0.0647616	11.4036	4.01e-30	1.08e-28	DYNC1H1
ENSG00000062822	1265.11	-1.09566	0.0571044	-19.187	4.75e-82	9.19e-80	POLD1		ENSG00000170122	162.407	0.738769	0.152629	4.84029	1.3e-06	6.32e-06	FOXD4
ENSG00000170312	3329.22	-1.09409	0.0648687	-16.8663	7.96e-64	8.86e-62	CDK1		ENSG00000198862	1046.96	0.738918	0.0669609	11.0351	2.59e-28	6.39e-27	LTN1
ENSG00000108679	1832.17	-1.0937	0.0979949	-11.1608	6.34e-29	1.6e-27	LGALS3BP		ENSG00000232775	43.1352	0.739121	0.29615	2.49576	0.0125687	0.0305212	BMS1P22
ENSG00000198363	10729.5	-1.0922	0.0385452	-28.3356	1.26e-176	1.63e-173	ASPH		ENSG00000137434	49.8716	0.739211	0.281517	2.62581	0.00864421	0.021939	C6orf52
ENSG00000186462	51.7164	-1.09196	0.251519	-4.34146	1.42e-05	5.99e-05	NAP1L2		ENSG00000268895	82.4243	0.739535	0.203962	3.62584	0.000288024	0.00099692	A1BG-AS1
ENSG00000097021	663.779	-1.09115	0.11352	-9.61196	7.12e-22	1.21e-20	ACOT7		ENSG00000272579	101.947	0.740691	0.186129	3.97946	6.91e-05	0.000265245	#N/A
ENSG00000136982	577.113	-1.08976	0.0914065	-11.9221	9.08e-33	2.78e-31	DSCC1		ENSG00000152763	52.5269	0.741627	0.320859	2.31138	0.020812	0.0473278	WDR78
ENSG00000135314	96.3703	-1.08953	0.158369	-6.87972	6e-12	5e-11	KHDC1		ENSG00000136003	2933.38	0.741633	0.0688635	10.7696	4.79e-27	1.1e-25	ISCU
ENSG00000152270	432.507	-1.08953	0.0956232	-11.394	4.48e-30	1.2e-28	PDE3B		ENSG00000224511	195.241	0.741949	0.115137	6.44404	1.16e-10	8.66e-10	LINC00365
ENSG00000184937	139.649	-1.08927	0.153984	-7.07392	1.51e-12	1.33e-11	WT1		ENSG00000181404	383.649	0.742667	0.0961229	7.72623	1.11e-14	1.16e-13	WASHC1
ENSG00000115457	1270.65	-1.08804	0.0762294	-14.2732	3.21e-46	1.83e-44	IGFBP2		ENSG00000042317	334.551	0.743076	0.11932	6.22758	4.74e-10	3.32e-09	SPATA7
ENSG00000160753	1356.5	-1.08786	0.0702477	-15.4861	4.31e-54	3.34e-52	RUSC1		ENSG00000166016	516.821	0.744992	0.0919937	8.0983	5.57e-16	6.4e-15	ABTB2
ENSG00000155368	4964.32	-1.08766	0.0589808	-18.441	6.16e-76	9.98e-74	DBI		ENSG00000121454	136.704	0.745031	0.164932	4.5172	6.27e-06	2.8e-05	LHX4
ENSG00000090530	42.2157	-1.08734	0.359456	-3.02497	0.00248661	0.00718585	P3H2		ENSG00000072832	380.17	0.745223	0.103732	7.18414	6.76e-13	6.18e-12	CRMP1
ENSG00000164442	2214.09	-1.08595	0.0808407	-13.4332	3.86e-41	1.8e-39	CITED2		ENSG00000185158	252.218	0.746524	0.12827	5.81993	5.89e-09	3.7e-08	LRRC37B
ENSG00000214110	30.3521	-1.08558	0.360879	-3.00817	0.00262829	0.00755064	LDHAP4		ENSG00000184672	81.4477	0.748499	0.232466	3.21982	0.00128273	0.00392853	RALYL
ENSG00000111206	2989.7	-1.08468	0.119693	-9.06217	1.28e-19	1.87e-18	FOXM1		ENSG00000173210	109.487	0.748913	0.17143	4.36861	1.25e-05	5.34e-05	ABLIM3
ENSG00000171236	427.673	-1.08455	0.0996225	-10.8866	1.34e-27	3.17e-26	LRG1		ENSG00000257698	396.085	0.749833	0.159228	4.70917	2.49e-06	1.17e-05	GIHCG
ENSG00000178445	305.197	-1.08405	0.130683	-8.29524	1.08e-16	1.31e-15	GLDC		ENSG00000270344	93.7544	0.749952	0.17081	4.39056	1.13e-05	4.86e-05	POC1B-AS1
ENSG00000242071	244.556	-1.08387	0.112022	-9.67546	3.83e-22	6.58e-21	RPL7AP6		ENSG00000221817	101.399	0.750114	0.195313	3.84057	0.00012275	0.00045099	PPP3CB-AS1
ENSG00000251685	12.3073	-1.08147	0.445559	-2.42723	0.0152147	0.0360877	UGT2B27P		ENSG00000234546	40.7442	0.750122	0.258318	2.90387	0.00368577	0.0102687	LNCTAM34A
ENSG00000132692	44.0328	-1.08128	0.314777	-3.43507	0.000592392	0.00194657	BCAN		ENSG00000102699	5672.2	0.750518	0.0482584	15.552	1.54e-54	1.22e-52	PARP4
ENSG00000115596	29.7563	-1.08083	0.306853	-3.52231	0.000427811	0.00144178	WNT6		ENSG00000166250	64.9095	0.750528	0.27781	2.70159	0.00690089	0.0179631	CLMP
ENSG00000215146	264.877	-1.08034	0.125945	-8.5779	9.66e-18	1.26e-16	BX322639.1		ENSG00000237296	61.5483	0.750576	0.230301	3.25911	0.00111761	0.00347207	SMG1P1
ENSG00000169083	4691.97	-1.07994	0.0438517	-24.6271	6.48e-134	3.73e-131	AR		ENSG00000182600	82.4357	0.750728	0.188483	3.98301	6.8e-05	0.000261738	SNORC
ENSG00000069424	828.105	-1.07559	0.0818596	-13.1395	1.96e-39	8.31e-38	KCNAB2		ENSG00000270015	243.288	0.751548	0.116483	6.45199	1.1e-10	8.25e-10	#N/A
ENSG00000180264	75.7457	-1.07291	0.209005	-5.13342	2.85e-07	1.5e-06	ADGRD2		ENSG00000176438	469.798	0.751763	0.0889969	8.44707	2.99e-17	3.76e-16	SYNE3
ENSG00000007968	436.489	-1.07284	0.111077	-9.65855	4.52e-22	7.72e-21	E2F2		ENSG00000064933	970.006	0.75219	0.0809247	9.29493	1.47e-20	2.31e-19	PMS1
ENSG00000198056	594.548	-1.07257	0.0847082	-12.6619	9.61e-37	3.59e-35	PRIM1		ENSG00000215241	44.6881	0.752561	0.270924	2.77775	0.00547363	0.0146285	LINC02449
ENSG00000224186	198.296	-1.07066	0.115629	-9.25941	2.06e-20	3.19e-19	C5orf66		ENSG00000228915	48.1522	0.753012	0.227181	3.31459	0.00091777	0.00290133	OR7E128P
ENSG00000224411	23.2243	-1.07058	0.44101	-2.42757	0.0152003	0.0360661	HSP90AA2P		ENSG00000277476	132.043	0.753102	0.168129	4.47932	7.49e-06	3.31e-05	AC005332.5
ENSG00000254389	101.499	-1.0697	0.213736	-5.00474	5.59e-07	2.84e-06	RHPN1-AS1		ENSG00000260121	130.957	0.753264	0.160994	4.67884	2.88e-06	1.34e-05	AC138028.4
ENSG00000137834	661.616	-1.06959	0.0855278	-12.5057	6.94e-36	2.48e-34	SMAD6		ENSG00000274265	64.698	0.75327	0.205742	3.66123	0.000251004	0.000878123	AC245297.3
ENSG00000198157	394.074	-1.06931	0.134954	-7.9235	2.31e-15	2.55e-14	HMGN5		ENSG00000198556	500.41	0.753639	0.0865849	8.70404	3.2e-18	4.3e-17	ZNF789
ENSG00000250387	209.237	-1.06901	0.140721	-7.59665	3.04e-14	3.1e-13	LINC02197		ENSG00000269973	44.208	0.753809	0.286146	2.63435	0.00842982	0.0214537	AC010969.2
ENSG00000157111	32.2556	-1.06764	0.415499	-2.56954	0.0101835	0.0253321	TMEM171		ENSG00000255769	764.567	0.754007	0.0896078	8.41452	3.95e-17	4.92e-16	GOLGA2P10
ENSG00000142552	494.994	-1.06638	0.0828397	-12.8728	6.4e-38	2.51e-36	RCN3		ENSG00000143365	712.969	0.754198	0.0972252	7.75723	8.68e-15	9.16e-14	RORC
ENSG00000184584	153.477	-1.06513	0.16744	-6.36127	2e-10	1.46e-09	TMEM173		ENSG00000239883	168.907	0.754238	0.150322	5.0175	5.23e-07	2.67e-06	PARGP1
ENSG00000073111	3906.94	-1.06473	0.0563878	-18.8823	1.59e-79	2.91e-77	MCM2		ENSG00000153029	452.58	0.756513	0.0993459	7.61493	2.64e-14	2.7e-13	MR1
ENSG00000164109	1486.59	-1.0638	0.0737517	-14.424	3.65e-47	2.18e-45	MAD2L1		ENSG00000272078	78.4693	0.75712	0.196737	3.84839	0.000118895	0.000437941	AL139423.1
ENSG00000005022	9637.29	-1.06363	0.0338985	-31.3768	4.19e-216	1.81e-212	SLC25A5		ENSG00000278948	47.0622	0.757584	0.258037	2.93596	0.00332519	0.00934654	AL031587.5
ENSG00000158050	312.886	-1.06182	0.116229	-9.1356	6.5e-20	9.71e-19	DUSP2		ENSG00000108961	45.8064	0.75759	0.284694	2.66107	0.00778937	0.0200145	RANGRF
ENSG00000197905	700.23	-1.06125	0.0731415	-14.5096	1.05e-47	6.41e-46	TEAD4		ENSG00000138193	217.479	0.758825	0.186293	4.0733	4.64e-05	0.000182877	PLCE1
ENSG00000164920	215.033	-1.06039	0.117034	-9.06058	1.3e-19	1.89e-18	OSR2		ENSG00000106404	859.677	0.759738	0.0694277	10.9429	7.19e-28	1.73e-26	CLDN15
ENSG00000180353	42.664	-1.05476	0.245293	-4.30002	1.71e-05	7.15e-05	HCLS1		ENSG00000163728	810.547	0.759821	0.0880613	8.62833	6.23e-18	8.19e-17	TTC14
ENSG00000181649	839.18	-1.05475	0.0942983	-11.1853	4.81e-29	1.23e-27	PHLDA2		ENSG00000006611	51.1223	0.760659	0.317984	2.39213	0.0167509	0.0392641	USH1C
ENSG00000179314	150.941	-1.05312	0.213088	-4.9422	7.72e-07	3.86e-06	WSCD1		ENSG00000153790	94.9654	0.761225	0.250123	3.0434	0.00233918	0.00679848	C7orf31
ENSG00000049541	1615.71	-1.05018	0.0575276	-18.2553	1.88e-74	2.8e-72	RFC2		ENSG00000105696	242.558	0.761653	0.122794	6.20271	5.55e-10	3.87e-09	TMEM59L
ENSG00000062038	555.725	-1.0499	0.0908537	-11.556	6.89e-31	1.94e-29	CDH3		ENSG00000167766	878.688	0.762515	0.0678472	11.2387	2.63e-29	6.79e-28	ZNF83
ENSG00000261441	13.4379	-1.04867	0.450574	-2.32742	0.0199431	0.0456444	AC124068.2		ENSG00000162409	929.773	0.762981	0.0825888	9.2383	2.5e-20	3.85e-19	PRKAA2
ENSG00000164841	23.2499	-1.04776	0.383292	-2.73359	0.00626482	0.016493	TMEM74		ENSG00000197748	39.5472	0.763534	0.31181	2.44872	0.0143366	0.0342685	CFAP43
ENSG00000112964	242.925	-1.04764	0.119052	-8.79987	1.37e-18	1.88e-17	GHR		ENSG00000171766	53.9552	0.764141	0.25942	2.94558	0.00322351	0.00908438	GATM
ENSG00000100024	12.8968	-1.0467	0.426832	-2.45225	0.0141967	0.0339748	UPB1		ENSG00000197816	48.6951	0.765171	0.273435	2.79837	0.00513618	0.0138207	CCDC180
ENSG00000107165	21.7549	-1.04434	0.389815	-2.67908	0.00738246	0.0190767	TYRP1		ENSG00000214827	47.819	0.765421	0.304741	2.51171	0.0120147	0.0293022	MTCP1
ENSG00000270246	86.2602	-1.04405	0.173305	-6.02436	1.7e-09	1.13e-08	#N/A		ENSG00000224413	95.7337	0.76545	0.195363	3.91808	8.93e-05	0.000335734	AP001476.1
ENSG00000095739	810.472	-1.04375	0.075814	-13.7673	4.01e-43	2.03e-41	BAMBI		ENSG00000263956	562.852	0.766322	0.0894732	8.56482	1.08e-17	1.4e-16	NBPF11
ENSG00000166902	1800.05	-1.0434	0.0510841	-20.4251	1e-92	2.64e-90	MRPL16		ENSG00000267248	68.84	0.767602	0.229319	3.34732	0.000815983	0.0026098	AC025048.2
ENSG00000188257	54.6858	-1.04298	0.210442	-4.95613	7.19e-07	3.61e-06	PLA2G2A		ENSG00000256683	182.6	0.768106	0.126928	6.05152	1.43e-09	9.62e-09	ZNF350
ENSG00000189159	4391.17	-1.0418	0.0362341	-28.7521	8.53e-182	1.3e-178	JPT1		ENSG00000265298	67.0607	0.768315	0.222987	3.44556	0.000569882	0.00187736	AC132812.1
ENSG00000105355	1446.31	-1.03986	0.064313	-16.1687	8.38e-59	7.84e-57	PLIN3		ENSG00000275888	35.7276	0.768506	0.296236	2.59424	0.00948015	0.0238019	AC132872.3
ENSG00000147536	504.633	-1.03971	0.0884837	-11.7502	7.04e-32	2.09e-30	GINS4		ENSG00000185561	1199.51	0.768527	0.064041	12.0005	3.53e-33	1.1e-31	TLCD2
ENSG00000010327	43.1161	-1.03857	0.312228	-3.32632	0.000879996	0.00279247	STAB1		ENSG00000166839	356.291	0.76901	0.0987832	7.78483	6.98e-15	7.44e-14	ANKDD1A
ENSG00000140263	15747	-1.03854	0.037873	-27.4217	1.51e-165	1.51e-162	SORD		ENSG00000196981	580.601	0.769128	0.0864138	8.90053	5.56e-19	7.82e-18	WDR5B
ENSG00000198554	1013.01	-1.03813	0.0640284	-16.2136	4.04e-59	3.81e-57	WDHD1		ENSG00000136111	1923.37	0.769596	0.0656234	11.7275	9.22e-32	2.72e-30	TBC1D4
ENSG00000157193	740.28	-1.03788	0.109744	-9.45732	3.16e-21	5.16e-20	LRP8		ENSG00000168539	44.7656	0.770793	0.249775	3.08594	0.00202907	0.00598173	CHRM1
ENSG00000157593	2387.48	-1.03666	0.0441167	-23.498	4.27e-122	1.94e-119	SLC35B2		ENSG00000204790	67.7378	0.771461	0.256424	3.00854	0.00262509	0.00754314	AL163540.1
ENSG00000237265	20.3949	-1.03586	0.390537	-2.65241	0.00799205	0.0204865	BX276092.7		ENSG00000280287	207.534	0.772137	0.128348	6.01598	1.79e-09	1.19e-08	AC131212.3
ENSG00000225031	24.6762	-1.0352	0.364887	-2.83704	0.00455338	0.0123993	EIF4BP7		ENSG00000277072	497.636	0.772964	0.0917582	8.42392	3.64e-17	4.55e-16	STAG3L2
ENSG00000119408	2048.32	-1.03501	0.0574344	-18.0207	1.34e-72	1.92e-70	NEK6		ENSG00000022976	493.306	0.773389	0.0982268	7.8735	3.45e-15	3.76e-14	ZNF839
ENSG00000077152	1005.43	-1.03488	0.0740698	-13.9717	2.32e-44	1.24e-42	UBE2T		ENSG00000247627	45.3458	0.773473	0.30731	2.51692	0.0118387	0.0289193	MTND4P12
ENSG00000242114	63.7952	-1.03376	0.224064	-4.61369	3.96e-06	1.81e-05	MTFP1		ENSG00000279041	44.2904	0.773612	0.239063	3.23601	0.00121211	0.00373167	AC102945.2
ENSG00000144354	1129.15	-1.03354	0.0774311	-13.3479	1.22e-40	5.49e-39	CDCA7		ENSG00000237940	34.8513	0.774133	0.30288	2.55591	0.0105911	0.0262152	LINC01238
ENSG00000196743	1648.23	-1.03303	0.0666972	-15.4883	4.16e-54	3.24e-52	GM2A		ENSG00000100154	469.944	0.774513	0.0990677	7.81802	5.37e-15	5.77e-14	TTC28
ENSG00000106785	2357.36	-1.03074	0.0625697	-16.4734	5.7e-61	5.61e-59	TRIM14		ENSG00000197653	251.229	0.774669	0.111667	6.93731	4e-12	3.38e-11	DNAH10
ENSG00000197744	46.0754	-1.03068	0.271217	-3.80021	0.000144576	0.000525664	PTMAP2		ENSG00000165895	117.687	0.775485	0.201905	3.84085	0.000122611	0.000450541	ARHGAP42
ENSG00000276043	913.932	-1.02978	0.0684891	-15.0357	4.29e-51	3e-49	UHRF1		ENSG00000263069	43.2915	0.775664	0.322751	2.40329	0.0162483	0.0382417	RNF213-AS1
ENSG00000117115	74.644	-1.02968	0.199126	-5.17097	2.33e-07	1.24e-06	PADI2		ENSG00000173230	5260.84	0.775986	0.0526025	14.7519	2.99e-49	1.91e-47	GOLGB1
ENSG00000110108	2906.64	-1.02753	0.0685308	-14.9937	8.07e-51	5.55e-49	TMEM109		ENSG00000260528	28.8753	0.777638	0.328043	2.37053	0.0177624	0.04131	FAM157C
ENSG00000198805	900.633	-1.02669	0.0796364	-12.8922	4.98e-38	1.97e-36	PNP		ENSG00000267858	136.63	0.777987	0.156604	4.96787	6.77e-07	3.41e-06	MZF1-AS1
ENSG00000011376	1742.31	-1.02587	0.0557245	-18.4097	1.1e-75	1.76e-73	LARS2		ENSG00000179406	997.63	0.778603	0.0764778	10.1808	2.42e-24	4.76e-23	LINC00174
ENSG00000149212	2797.99	-1.02492	0.0543672	-18.8519	2.84e-79	5.11e-77	SESN3		ENSG00000136059	67.5484	0.778797	0.282885	2.75305	0.00590426	0.0156375	VILL
ENSG00000137310	1038.67	-1.02407	0.0740484	-13.8297	1.69e-43	8.66e-42	TCF19		ENSG00000144214	40.4908	0.779265	0.309028	2.52166	0.0116802	0.0285888	LYG1
ENSG00000031691	247.112	-1.02395	0.118949	-8.60829	7.42e-18	9.73e-17	CENPQ		ENSG00000210194	43.6035	0.779379	0.320238	2.43375	0.0149434	0.0355581	MT-TE
ENSG00000257467	15.6868	-1.02369	0.416068	-2.46039	0.0138785	0.0333025	PPFIA2-AS1		ENSG00000211445	56.8101	0.779596	0.256281	3.04196	0.00235045	0.00682739	GPX3
ENSG00000099994	61.8587	-1.02236	0.254812	-4.01223	6.01e-05	0.00023336	SUSD2		ENSG00000113296	69.9257	0.780391	0.229726	3.39706	0.000681148	0.0022113	THBS4
ENSG00000149485	5896.82	-1.02168	0.0520576	-19.626	9.28e-86	1.92e-83	FADS1		ENSG00000175691	154.355	0.780426	0.154185	5.06161	4.16e-07	2.14e-06	ZNF77
ENSG00000084710	61.7749	-1.02103	0.24783	-4.11987	3.79e-05	0.00015138	EFR3B		ENSG00000283103	62.0269	0.780764	0.233846	3.33879	0.000841432	0.00268324	AC010642.2
ENSG00000184260	25.9471	-1.02067	0.410102	-2.48882	0.0128167	0.0310595	HIST2H2AC		ENSG00000078177	485.245	0.780794	0.0977599	7.98685	1.38e-15	1.55e-14	N4BP2
ENSG00000101220	1518.28	-1.0199	0.0737434	-13.8303	1.67e-43	8.61e-42	C20orf27		ENSG00000165828	40.9302	0.781407	0.27935	2.79724	0.00515417	0.013862	PRAP1
ENSG00000249992	56.8846	-1.0191	0.254707	-4.00105	6.31e-05	0.000243576	TMEM158		ENSG00000099954	408.828	0.781436	0.114054	6.85147	7.31e-12	6.06e-11	CECR2
ENSG00000162174	791.288	-1.01813	0.0962398	-10.5791	3.73e-26	8.14e-25	ASRGL1		ENSG00000226328	149.507	0.782628	0.154903	5.05238	4.36e-07	2.24e-06	NUP50-DT
ENSG00000180198	3579.28	-1.0165	0.0369025	-27.5457	4.99e-167	5.17e-164	RCC1		ENSG00000019485	143.711	0.783066	0.164322	4.76543	1.88e-06	8.99e-06	PRDM11
ENSG00000004478	8443.2	-1.01636	0.0357687	-28.4147	1.33e-177	1.82e-174	FKBP4		ENSG00000150347	952.708	0.783111	0.0739807	10.5853	3.48e-26	7.62e-25	ARID5B
ENSG00000169783	209.828	-1.01526	0.146078	-6.95014	3.65e-12	3.1e-11	LINGO1		ENSG00000143443	56.0306	0.783114	0.29776	2.63002	0.00853797	0.021697	C1orf56
ENSG00000137267	211.876	-1.01512	0.121163	-8.37815	5.38e-17	6.63e-16	TUBB2A		ENSG00000196275	224.801	0.783268	0.135263	5.7907	7.01e-09	4.36e-08	GTF2IRD2
ENSG00000169064	17.3924	-1.01159	0.397438	-2.54529	0.0109188	0.0269209	ZBBX		ENSG00000176920	33.2334	0.78365	0.303119	2.58529	0.00972966	0.0243552	FUT2
ENSG00000131143	8743.85	-1.007	0.0626501	-16.0734	3.92e-58	3.58e-56	COX4I1		ENSG00000197062	97.0289	0.784257	0.302976	2.58851	0.00963923	0.0241521	ZSCAN26
ENSG00000154328	1192.95	-1.00644	0.0603047	-16.6892	1.57e-62	1.63e-60	NEIL2		ENSG00000272631	54.1932	0.784284	0.237497	3.30229	0.000958999	0.00301987	AC067750.1
ENSG00000197142	26.7638	-1.00589	0.353354	-2.8467	0.00441752	0.0120801	ACSL5		ENSG00000144724	594.733	0.784446	0.0792087	9.90352	4.02e-23	7.35e-22	PTPRG
ENSG00000213949	76.4724	-1.00513	0.196464	-5.1161	3.12e-07	1.63e-06	ITGA1		ENSG00000229089	41.3885	0.784591	0.341246	2.2992	0.0214937	0.0486497	ANKRD20A8P
ENSG00000113368	3606.45	-1.00509	0.0504489	-19.9229	2.58e-88	6.02e-86	LMNB1		ENSG00000278175	111.135	0.785505	0.163532	4.80336	1.56e-06	7.53e-06	GLIDR
ENSG00000176641	65.2929	-1.00366	0.239084	-4.19795	2.69e-05	0.000109738	RNF152		ENSG00000229950	37.0091	0.785774	0.296682	2.64853	0.00808415	0.0206939	TFAP2A-AS1
ENSG00000110799	88.9675	-1.00197	0.259071	-3.86753	0.000109945	0.000407408	VWF		ENSG00000239382	73.904	0.786024	0.228416	3.44119	0.000579155	0.00190646	ALKBH6
ENSG00000277383	25.523	-1.00195	0.337085	-2.97239	0.00295489	0.00839217	AC010331.1		ENSG00000159496	49.9207	0.786647	0.254206	3.09453	0.00197126	0.00582522	RGL4
ENSG00000073536	994.548	-1.00168	0.0763517	-13.1192	2.55e-39	1.07e-37	NLE1		ENSG00000002016	459.801	0.786934	0.0897773	8.7654	1.86e-18	2.54e-17	RAD52
ENSG00000108528	3780.02	-0.999557	0.0382156	-26.1557	8.48e-151	6.46e-148	SLC25A11		ENSG00000128000	792.822	0.787742	0.0590979	13.3294	1.56e-40	6.97e-39	ZNF780B
ENSG00000254612	47.0004	-0.998533	0.36598	-2.72838	0.00636462	0.0167234	AP001000.1		ENSG00000124549	113.055	0.78792	0.172381	4.57081	4.86e-06	2.2e-05	BTN2A3P
ENSG00000141522	3106.31	-0.997762	0.0722327	-13.8132	2.12e-43	1.08e-41	ARHGDIA		ENSG00000148057	291.319	0.788984	0.116056	6.7983	1.06e-11	8.64e-11	IDNK
ENSG00000109089	1788.51	-0.997672	0.0779089	-12.8056	1.53e-37	5.87e-36	CDR2L		ENSG00000227857	55.8553	0.789147	0.265591	2.97128	0.00296561	0.00841982	AL358075.2
ENSG00000158470	1832.76	-0.997604	0.0563611	-17.7002	4.18e-70	5.61e-68	B4GALT5		ENSG00000008516	31.6838	0.789343	0.326082	2.42069	0.0154912	0.0366696	MMP25
ENSG00000170561	72.4124	-0.995574	0.2024	-4.91885	8.71e-07	4.33e-06	IRX2		ENSG00000087085	36.1291	0.789356	0.320772	2.4608	0.0138629	0.0332711	ACHE
ENSG00000114646	363.447	-0.992868	0.124175	-7.9957	1.29e-15	1.45e-14	CSPG5		ENSG00000160961	237.838	0.789616	0.118423	6.66778	2.6e-11	2.06e-10	ZNF333
ENSG00000176532	93.6775	-0.992201	0.193771	-5.12047	3.05e-07	1.6e-06	PRR15		ENSG00000182196	26.4422	0.790026	0.323842	2.43954	0.0147058	0.0350766	ARL6IP4
ENSG00000102760	24.5436	-0.991522	0.349964	-2.83321	0.00460829	0.0125383	RGCC		ENSG00000105088	103.596	0.790214	0.215379	3.66895	0.000243547	0.000853418	OLFM2
ENSG00000107738	17.8028	-0.991398	0.391597	-2.53168	0.0113519	0.0278614	VSIR		ENSG00000186056	107.688	0.791117	0.161891	4.88674	1.03e-06	5.06e-06	MATN1-AS1
ENSG00000176890	703.018	-0.990981	0.0818899	-12.1014	1.04e-33	3.33e-32	TYMS		ENSG00000101004	399.67	0.791227	0.0868859	9.1065	8.51e-20	1.25e-18	NINL
ENSG00000168476	1672.18	-0.990097	0.0542116	-18.2636	1.61e-74	2.42e-72	REEP4		ENSG00000121417	294.937	0.792553	0.109712	7.22392	5.05e-13	4.67e-12	ZNF211
ENSG00000095303	30.8204	-0.989718	0.333088	-2.97134	0.002965	0.00841902	PTGS1		ENSG00000149716	661.305	0.792715	0.0871136	9.09978	9.05e-20	1.33e-18	LTO1
ENSG00000174442	1199.61	-0.989714	0.0737045	-13.4281	4.14e-41	1.92e-39	ZWILCH		ENSG00000137496	206.963	0.793656	0.137851	5.75735	8.54e-09	5.27e-08	IL18BP
ENSG00000186871	340.83	-0.988404	0.123323	-8.01479	1.1e-15	1.24e-14	ERCC6L		ENSG00000259456	40.1567	0.793885	0.256854	3.0908	0.00199616	0.0058961	ADNP-AS1
ENSG00000172893	3930.04	-0.987508	0.0496923	-19.8725	7.04e-88	1.59e-85	DHCR7		ENSG00000155961	496.165	0.79447	0.0907278	8.75663	2.01e-18	2.73e-17	RAB39B
ENSG00000123374	1282.35	-0.987486	0.0533294	-18.5167	1.51e-76	2.53e-74	CDK2		ENSG00000095564	3130.54	0.795015	0.0481409	16.5144	2.89e-61	2.89e-59	BTAF1
ENSG00000059377	241.131	-0.987344	0.133051	-7.42081	1.16e-13	1.13e-12	TBXAS1		ENSG00000167767	84.3136	0.795633	0.209392	3.79973	0.000144855	0.000526603	KRT80
ENSG00000166347	3408.18	-0.985871	0.0537611	-18.338	4.12e-75	6.47e-73	CYB5A		ENSG00000139178	361.478	0.79566	0.0978592	8.13065	4.27e-16	4.95e-15	C1RL
ENSG00000006625	1454.08	-0.985126	0.062229	-15.8306	1.91e-56	1.64e-54	GGCT		ENSG00000196338	50.4423	0.795836	0.28041	2.83812	0.00453805	0.0123653	NLGN3
ENSG00000141574	565.338	-0.984136	0.0862338	-11.4124	3.63e-30	9.81e-29	SECTM1		ENSG00000072682	1116.34	0.795931	0.0689652	11.541	8.19e-31	2.3e-29	P4HA2
ENSG00000225285	159.394	-0.982478	0.164568	-5.97004	2.37e-09	1.55e-08	LINC01770		ENSG00000235316	115.8	0.796198	0.177511	4.48533	7.28e-06	3.22e-05	DUSP8P5
ENSG00000164124	419.792	-0.982258	0.0801622	-12.2534	1.61e-34	5.39e-33	TMEM144		ENSG00000073712	1061.19	0.796241	0.0680123	11.7073	1.17e-31	3.42e-30	FERMT2
ENSG00000168078	1111.55	-0.979881	0.0858986	-11.4074	3.84e-30	1.04e-28	PBK		ENSG00000065621	168.764	0.796365	0.154332	5.16009	2.47e-07	1.31e-06	GSTO2
ENSG00000100028	2868.36	-0.979694	0.0520885	-18.8082	6.46e-79	1.16e-76	SNRPD3		ENSG00000273036	90.9045	0.796425	0.220856	3.60609	0.00031085	0.00107001	AL390726.4
ENSG00000143878	3605.72	-0.978865	0.051827	-18.8871	1.46e-79	2.71e-77	RHOB		ENSG00000188549	1078.41	0.796835	0.0746464	10.6748	1.34e-26	3.01e-25	CCDC9B
ENSG00000226085	1094.95	-0.977613	0.0979582	-9.97989	1.87e-23	3.48e-22	UQCRFS1P1		ENSG00000115468	220.116	0.797871	0.158499	5.03392	4.81e-07	2.46e-06	EFHD1
ENSG00000120437	839.465	-0.977543	0.0681418	-14.3457	1.13e-46	6.57e-45	ACAT2		ENSG00000168280	586.406	0.798026	0.104677	7.6237	2.47e-14	2.53e-13	KIF5C
ENSG00000130005	2895.38	-0.97751	0.0440901	-22.1707	6.58e-109	2.47e-106	GAMT		ENSG00000117360	1725.74	0.798146	0.0465118	17.1601	5.28e-66	6.49e-64	PRPF3
ENSG00000182195	1857.36	-0.976452	0.0835228	-11.6908	1.42e-31	4.14e-30	LDOC1		ENSG00000180769	93.9173	0.798215	0.19792	4.03302	5.51e-05	0.000214858	WDFY3-AS2
ENSG00000110104	1376.06	-0.976152	0.06245	-15.6309	4.48e-55	3.66e-53	CCDC86		ENSG00000196693	1135.48	0.798443	0.0624014	12.7953	1.74e-37	6.67e-36	ZNF33B
ENSG00000273604	783.286	-0.973465	0.0790164	-12.3198	7.09e-35	2.42e-33	EPOP		ENSG00000165029	75.3851	0.79863	0.18069	4.41989	9.87e-06	4.29e-05	ABCA1
ENSG00000188856	228.717	-0.972605	0.219193	-4.4372	9.11e-06	3.98e-05	RPSAP47		ENSG00000131480	144.599	0.798732	0.164094	4.86752	1.13e-06	5.55e-06	AOC2
ENSG00000176454	697.674	-0.971595	0.0852368	-11.3988	4.24e-30	1.14e-28	LPCAT4		ENSG00000115137	275.7	0.79878	0.108999	7.32833	2.33e-13	2.22e-12	DNAJC27
ENSG00000178750	29.6726	-0.971244	0.301652	-3.21974	0.00128305	0.00392905	STX19		ENSG00000091622	132.232	0.799987	0.161233	4.96169	6.99e-07	3.51e-06	PITPNM3
ENSG00000131470	282.806	-0.969594	0.128778	-7.52916	5.11e-14	5.09e-13	PSMC3IP		ENSG00000283064	48.8842	0.800177	0.280777	2.84987	0.00437376	0.0119706	AL353759.1
ENSG00000076003	2121.02	-0.966253	0.0488038	-19.7987	3.05e-87	6.65e-85	MCM6		ENSG00000147246	108.472	0.800579	0.195845	4.08782	4.35e-05	0.000172425	HTR2C
ENSG00000186792	442.625	-0.966189	0.0858199	-11.2583	2.11e-29	5.46e-28	HYAL3		ENSG00000233175	24.4228	0.800662	0.344591	2.32351	0.0201516	0.0460606	AC008105.1
ENSG00000189046	1016.55	-0.966075	0.0635378	-15.2047	3.29e-52	2.39e-50	ALKBH2		ENSG00000267680	157.474	0.800995	0.152718	5.24493	1.56e-07	8.47e-07	ZNF224
ENSG00000105409	419.286	-0.966039	0.132254	-7.30441	2.78e-13	2.63e-12	ATP1A3		ENSG00000260526	40.6494	0.801444	0.294373	2.72254	0.00647812	0.0169838	AC109347.1
ENSG00000255346	138.256	-0.965584	0.172361	-5.60212	2.12e-08	1.26e-07	NOX5		ENSG00000109046	2535.96	0.802001	0.0677668	11.8347	2.58e-32	7.77e-31	WSB1
ENSG00000112576	1413.28	-0.964854	0.0671108	-14.377	7.21e-47	4.24e-45	CCND3		ENSG00000100170	21.4646	0.802452	0.327061	2.45352	0.0141465	0.0338671	SLC5A1
ENSG00000229953	37.4574	-0.964828	0.282631	-3.41374	0.000640781	0.00209389	AL590666.2		ENSG00000078699	2073.27	0.802567	0.061907	12.9641	1.96e-38	7.84e-37	CBFA2T2
ENSG00000172965	131.692	-0.96436	0.162111	-5.94876	2.7e-09	1.76e-08	MIR4435-2HG		ENSG00000151773	216.523	0.802852	0.128385	6.25345	4.01e-10	2.84e-09	CCDC122
ENSG00000154654	1202.57	-0.962378	0.0495262	-19.4317	4.16e-84	8.43e-82	NCAM2		ENSG00000100593	53.1881	0.803449	0.25874	3.10523	0.00190128	0.00563512	ISM2
ENSG00000072310	19749.4	-0.962343	0.0750804	-12.8175	1.31e-37	5.06e-36	SREBF1		ENSG00000227543	45.2571	0.804114	0.295566	2.72059	0.00651648	0.017074	SPAG5-AS1
ENSG00000137309	5327.71	-0.96221	0.0810804	-11.8673	1.75e-32	5.3e-31	HMGA1		ENSG00000242086	522.571	0.804606	0.0931501	8.63774	5.73e-18	7.57e-17	MUC20-OT1
ENSG00000179409	1835.5	-0.961769	0.0620862	-15.4909	4e-54	3.13e-52	GEMIN4		ENSG00000274276	304.615	0.805022	0.15744	5.11321	3.17e-07	1.65e-06	CBSL
ENSG00000017427	72.1948	-0.961614	0.246702	-3.89787	9.7e-05	0.000363073	IGF1		ENSG00000248278	44.456	0.805027	0.28541	2.8206	0.00479341	0.0129874	SUMO2P17
ENSG00000119574	1223.41	-0.958605	0.0759584	-12.6201	1.64e-36	6.04e-35	ZBTB45		ENSG00000234062	70.3978	0.805635	0.224097	3.59503	0.00032436	0.00111282	AL390879.1
ENSG00000182054	3518.54	-0.957992	0.0576819	-16.6082	6.08e-62	6.18e-60	IDH2		ENSG00000198625	1427.23	0.805658	0.0748642	10.7616	5.23e-27	1.2e-25	MDM4
ENSG00000008517	775.175	-0.957566	0.0817827	-11.7087	1.15e-31	3.37e-30	IL32		ENSG00000117616	568.849	0.806263	0.0903406	8.9247	4.47e-19	6.34e-18	RSRP1
ENSG00000138587	167.857	-0.957391	0.123386	-7.75931	8.54e-15	9.03e-14	MNS1		ENSG00000196872	43.3093	0.806699	0.33671	2.39583	0.016583	0.0389093	KIAA1211L
ENSG00000214076	221.614	-0.957311	0.138125	-6.93075	4.19e-12	3.54e-11	CPSF1P1		ENSG00000204930	37.6054	0.807679	0.251649	3.20955	0.00132943	0.00405814	FAM221B
ENSG00000160606	824.002	-0.95677	0.0711388	-13.4493	3.11e-41	1.46e-39	TLCD1		ENSG00000144802	85.5115	0.808206	0.211691	3.81786	0.000134613	0.000492063	NFKBIZ
ENSG00000152455	655.001	-0.954162	0.0828026	-11.5233	1.01e-30	2.81e-29	SUV39H2		ENSG00000272994	200.452	0.808751	0.121031	6.68221	2.35e-11	1.87e-10	AC012360.3
ENSG00000169689	2190.81	-0.95407	0.0627772	-15.1977	3.66e-52	2.65e-50	CENPX		ENSG00000121039	728.656	0.808823	0.0699942	11.5556	6.92e-31	1.94e-29	RDH10
ENSG00000102547	1062.01	-0.953699	0.0714897	-13.3404	1.35e-40	6.03e-39	CAB39L		ENSG00000174738	2239.23	0.809468	0.0495232	16.3452	4.7e-60	4.53e-58	NR1D2
ENSG00000237649	988.502	-0.95229	0.0832745	-11.4356	2.78e-30	7.58e-29	KIFC1		ENSG00000115425	532.912	0.810157	0.0920638	8.79996	1.37e-18	1.88e-17	PECR
ENSG00000010319	273.873	-0.951927	0.116873	-8.14498	3.79e-16	4.41e-15	SEMA3G		ENSG00000228798	151.542	0.810275	0.145111	5.58384	2.35e-08	1.39e-07	#N/A
ENSG00000261804	95.5102	-0.951829	0.168001	-5.66561	1.47e-08	8.84e-08	AC007342.4		ENSG00000261884	33.6853	0.810717	0.329707	2.4589	0.0139363	0.0334256	AC040162.1
ENSG00000034510	3135.68	-0.950733	0.0563041	-16.8857	5.74e-64	6.46e-62	TMSB10		ENSG00000149311	1804.23	0.811568	0.0554601	14.6334	1.72e-48	1.07e-46	ATM
ENSG00000185634	21.6386	-0.949428	0.347296	-2.73377	0.00626136	0.0164872	SHC4		ENSG00000259959	100.939	0.811997	0.223342	3.63568	0.000277252	0.000962804	AC107068.1
ENSG00000160932	3324.19	-0.949113	0.0716499	-13.2465	4.72e-40	2.08e-38	LY6E		ENSG00000184922	132.876	0.812415	0.178013	4.56379	5.02e-06	2.27e-05	FMNL1
ENSG00000043591	95.5881	-0.947355	0.274736	-3.44824	0.000564245	0.00185974	ADRB1		ENSG00000180539	26.8914	0.81257	0.328506	2.47353	0.0133784	0.0322788	C9orf139
ENSG00000225880	49.0507	-0.946275	0.262716	-3.6019	0.000315906	0.0010854	LINC00115		ENSG00000114120	6329.2	0.812652	0.0362715	22.4047	3.54e-111	1.37e-108	SLC25A36
ENSG00000186076	69.1451	-0.945333	0.198097	-4.77207	1.82e-06	8.72e-06	AC012085.1		ENSG00000100206	149.612	0.813071	0.218209	3.72611	0.000194454	0.000692535	DMC1
ENSG00000101945	320.095	-0.944004	0.101997	-9.25521	2.14e-20	3.31e-19	SUV39H1		ENSG00000258727	35.7958	0.813368	0.310463	2.61986	0.00879659	0.0222647	AL135999.1
ENSG00000255561	53.8009	-0.943475	0.277003	-3.406	0.00065921	0.00214788	FDXACB1		ENSG00000175455	2245.95	0.813709	0.0509856	15.9596	2.44e-57	2.17e-55	CCDC14
ENSG00000143799	10850.4	-0.942417	0.0354681	-26.5709	1.47e-155	1.36e-152	PARP1		ENSG00000113240	557.333	0.814093	0.1075	7.57292	3.65e-14	3.69e-13	CLK4
ENSG00000198237	31.9286	-0.942266	0.298001	-3.16195	0.00156714	0.00471926	AC131392.1		ENSG00000236901	295.425	0.814171	0.11465	7.10138	1.24e-12	1.1e-11	MIR600HG
ENSG00000100302	35.9677	-0.941982	0.297982	-3.1612	0.00157121	0.00473043	RASD2		ENSG00000276317	78.984	0.815587	0.20569	3.96514	7.34e-05	0.000280235	AL357033.3
ENSG00000258053	18.7113	-0.941752	0.410682	-2.29314	0.0218397	0.0493231	AC025575.2		ENSG00000128918	269.818	0.81615	0.252451	3.23291	0.00122537	0.00376713	ALDH1A2
ENSG00000159063	1352.69	-0.941585	0.0593925	-15.8536	1.33e-56	1.15e-54	ALG8		ENSG00000221995	117.601	0.817644	0.177782	4.59914	4.24e-06	1.93e-05	TIAF1
ENSG00000016082	55.1641	-0.941426	0.299086	-3.14768	0.00164574	0.00493759	ISL1		ENSG00000244513	48.5347	0.817734	0.279598	2.92468	0.00344808	0.00965426	AC109587.1
ENSG00000101000	127.366	-0.941259	0.168533	-5.58502	2.34e-08	1.38e-07	PROCR		ENSG00000261159	61.1444	0.817829	0.258377	3.16526	0.00154944	0.00467249	AC112484.3
ENSG00000165490	384.028	-0.940982	0.109778	-8.57168	1.02e-17	1.32e-16	DDIAS		ENSG00000187650	252.14	0.818702	0.118602	6.90291	5.09e-12	4.26e-11	VMAC
ENSG00000187514	26860.6	-0.940255	0.0517947	-18.1535	1.21e-73	1.75e-71	PTMA		ENSG00000280828	30.0426	0.819352	0.353856	2.3155	0.0205858	0.046904	AC090114.3
ENSG00000150768	3746.71	-0.937733	0.0353627	-26.5175	6.08e-155	5.44e-152	DLAT		ENSG00000130997	47.0014	0.819474	0.280505	2.92143	0.00348429	0.00975143	POLN
ENSG00000116133	30519.5	-0.937535	0.0549687	-17.0558	3.17e-65	3.76e-63	DHCR24		ENSG00000167555	409.374	0.819978	0.09132	8.97917	2.73e-19	3.91e-18	ZNF528
ENSG00000169188	1267.11	-0.937059	0.0687002	-13.6398	2.32e-42	1.14e-40	APEX2		ENSG00000127241	27.3226	0.820053	0.336912	2.43403	0.0149319	0.0355368	MASP1
ENSG00000130312	1399.09	-0.936052	0.0719847	-13.0035	1.17e-38	4.75e-37	MRPL34		ENSG00000165359	501.139	0.821352	0.0979745	8.38333	5.15e-17	6.35e-16	INTS6L
ENSG00000159228	1447.75	-0.935535	0.0601403	-15.5559	1.45e-54	1.16e-52	CBR1		ENSG00000142515	6408.03	0.821966	0.0981143	8.37763	5.4e-17	6.65e-16	KLK3
ENSG00000124664	4159.6	-0.93457	0.071591	-13.0543	6.01e-39	2.47e-37	SPDEF		ENSG00000182326	60.3532	0.822047	0.2768	2.96982	0.00297976	0.00845537	C1S
ENSG00000144331	1141.61	-0.934509	0.102297	-9.13526	6.53e-20	9.74e-19	ZNF385B		ENSG00000184205	1049.52	0.822457	0.068105	12.0763	1.41e-33	4.48e-32	TSPYL2
ENSG00000140284	339.075	-0.933331	0.106896	-8.7312	2.52e-18	3.4e-17	SLC27A2		ENSG00000132141	107.73	0.822534	0.175265	4.69308	2.69e-06	1.26e-05	CCT6B
ENSG00000082497	214.788	-0.933166	0.186965	-4.99113	6e-07	3.04e-06	SERTAD4		ENSG00000074935	1366.13	0.822658	0.0621758	13.2312	5.8e-40	2.53e-38	TUBE1
ENSG00000131650	529.117	-0.932232	0.102053	-9.13475	6.56e-20	9.78e-19	KREMEN2		ENSG00000233122	30.8903	0.822716	0.297962	2.76114	0.00575994	0.0152943	CTAGE7P
ENSG00000184162	396.535	-0.930904	0.0920266	-10.1156	4.71e-24	9.13e-23	NR2C2AP		ENSG00000209082	410.732	0.82275	0.24682	3.3334	0.000857927	0.0027298	MT-TL1
ENSG00000167191	215.765	-0.930649	0.124073	-7.50084	6.34e-14	6.29e-13	GPRC5B		ENSG00000168016	84.5874	0.82286	0.198016	4.15553	3.25e-05	0.000130949	TRANK1
ENSG00000189403	13655.3	-0.929602	0.0547538	-16.9779	1.2e-64	1.39e-62	HMGB1		ENSG00000213397	38.3985	0.822888	0.344928	2.38568	0.0170475	0.0398909	HAUS7
ENSG00000175785	48.9349	-0.929502	0.298067	-3.11844	0.00181814	0.00540292	PRIMA1		ENSG00000115998	306.88	0.823195	0.120034	6.85804	6.98e-12	5.79e-11	C2orf42
ENSG00000102096	554.751	-0.929387	0.0949628	-9.78685	1.28e-22	2.28e-21	PIM2		ENSG00000272150	78.3986	0.823415	0.235015	3.50366	0.000458905	0.00153758	NBPF25P
ENSG00000001617	549.709	-0.929262	0.0890421	-10.4362	1.69e-25	3.56e-24	SEMA3F		ENSG00000170161	121.403	0.823525	0.174247	4.7262	2.29e-06	1.08e-05	AL512625.1
ENSG00000198576	57.8914	-0.92918	0.287349	-3.23363	0.00122229	0.003759	ARC		ENSG00000126790	512.098	0.82486	0.0871104	9.46913	2.82e-21	4.62e-20	L3HYPDH
ENSG00000080819	972.193	-0.928693	0.0692092	-13.4186	4.7e-41	2.17e-39	CPOX		ENSG00000102385	39.3592	0.824989	0.313698	2.62988	0.00854146	0.0217037	DRP2
ENSG00000127564	919.458	-0.928559	0.100902	-9.20262	3.49e-20	5.31e-19	PKMYT1		ENSG00000246695	98.2399	0.825011	0.178479	4.62245	3.79e-06	1.74e-05	RASSF8-AS1
ENSG00000034152	2305.82	-0.927871	0.0646894	-14.3435	1.17e-46	6.77e-45	MAP2K3		ENSG00000219626	129.654	0.825312	0.190989	4.32125	1.55e-05	6.53e-05	FAM228B
ENSG00000273366	34.7266	-0.926577	0.325156	-2.84964	0.00437683	0.0119764	#N/A		ENSG00000280152	31.4763	0.82532	0.353118	2.33724	0.0194269	0.0446325	AC009078.3
ENSG00000115194	41.366	-0.925415	0.310154	-2.98373	0.00284759	0.00811589	SLC30A3		ENSG00000188234	294.036	0.825779	0.104276	7.91918	2.39e-15	2.63e-14	AGAP4
ENSG00000136840	1168.72	-0.925301	0.0758042	-12.2065	2.87e-34	9.47e-33	ST6GALNAC4		ENSG00000243753	52.7817	0.825789	0.286633	2.881	0.00396413	0.0109618	HLA-L
ENSG00000183048	964.107	-0.925058	0.0859512	-10.7626	5.17e-27	1.19e-25	SLC25A10		ENSG00000247828	284.644	0.826602	0.129203	6.39772	1.58e-10	1.16e-09	TMEM161B-AS1
ENSG00000242574	29.7235	-0.925056	0.337236	-2.74306	0.00608704	0.0160788	HLA-DMB		ENSG00000114270	108.024	0.82774	0.169669	4.87857	1.07e-06	5.26e-06	COL7A1
ENSG00000104738	3701.08	-0.923729	0.0575988	-16.0373	7.01e-58	6.38e-56	MCM4		ENSG00000279491	42.7287	0.828126	0.257863	3.2115	0.00132044	0.00403307	AP003733.3
ENSG00000253368	266.118	-0.922407	0.139623	-6.60641	3.94e-11	3.07e-10	TRNP1		ENSG00000184381	757.521	0.828314	0.0778816	10.6355	2.04e-26	4.53e-25	PLA2G6
ENSG00000135414	630.964	-0.92094	0.0899354	-10.24	1.31e-24	2.63e-23	GDF11		ENSG00000135048	1143.99	0.829392	0.0607686	13.6484	2.06e-42	1.02e-40	CEMIP2
ENSG00000213585	7178.64	-0.920544	0.0332776	-27.6626	1.97e-168	2.13e-165	VDAC1		ENSG00000166323	79.4669	0.829464	0.218474	3.79662	0.000146683	0.000532578	C11orf65
ENSG00000149531	410.038	-0.919954	0.090563	-10.1582	3.05e-24	5.96e-23	FRG1BP		ENSG00000279253	43.8275	0.829702	0.264722	3.13423	0.00172304	0.00514569	AL121753.2
ENSG00000128050	7769.72	-0.91811	0.0448302	-20.4797	3.26e-93	8.9e-91	PAICS		ENSG00000037637	1330.76	0.830058	0.0514483	16.1338	1.48e-58	1.38e-56	FBXO42
ENSG00000277972	3504.99	-0.917929	0.0513781	-17.8662	2.16e-71	2.98e-69	CISD3		ENSG00000100156	72.2683	0.830773	0.249731	3.32667	0.000878891	0.00278931	SLC16A8
ENSG00000159199	1806.89	-0.917815	0.0608264	-15.0891	1.91e-51	1.35e-49	ATP5MC1		ENSG00000248456	33.1063	0.832222	0.268507	3.09944	0.00193887	0.00573473	LINC02485
ENSG00000275183	598.583	-0.917351	0.0886381	-10.3494	4.21e-25	8.63e-24	LENG9		ENSG00000101928	885.965	0.832223	0.0848945	9.80303	1.09e-22	1.95e-21	MOSPD1
ENSG00000161980	1010.69	-0.916372	0.0757525	-12.0969	1.1e-33	3.51e-32	POLR3K		ENSG00000182759	47.6521	0.832248	0.338945	2.45541	0.0140725	0.0337087	MAFA
ENSG00000136997	4128.23	-0.916265	0.0517311	-17.7121	3.38e-70	4.57e-68	MYC		ENSG00000225032	55.4633	0.832322	0.259381	3.20888	0.00133254	0.00406619	AL162586.1
ENSG00000206177	22.7108	-0.914323	0.349093	-2.61914	0.00881518	0.0223074	HBM		ENSG00000210174	81.9042	0.833537	0.23914	3.48556	0.000491103	0.00163657	MT-TR
ENSG00000132436	1392.36	-0.913813	0.0674918	-13.5396	9.13e-42	4.4e-40	FIGNL1		ENSG00000260404	400.572	0.834381	0.119166	7.00185	2.53e-12	2.18e-11	AC110079.1
ENSG00000166342	1221.94	-0.913627	0.0796019	-11.4775	1.71e-30	4.73e-29	NETO1		ENSG00000198521	53.6177	0.83459	0.263928	3.16219	0.00156587	0.00471598	ZNF43
ENSG00000236090	54.9372	-0.913438	0.227852	-4.00891	6.1e-05	0.000236492	LDHAP3		ENSG00000171368	477.794	0.835053	0.0949668	8.79311	1.45e-18	2e-17	TPPP
ENSG00000111674	307.1	-0.913324	0.282795	-3.22963	0.0012395	0.00380604	ENO2		ENSG00000243716	219.199	0.835392	0.134839	6.19549	5.81e-10	4.04e-09	NPIPB5
ENSG00000204388	2375.75	-0.912973	0.0693542	-13.1639	1.42e-39	6.05e-38	HSPA1B		ENSG00000149634	31.249	0.835634	0.32635	2.56054	0.0104509	0.0258954	SPATA25
ENSG00000052802	1080.31	-0.912473	0.0660041	-13.8245	1.81e-43	9.29e-42	MSMO1		ENSG00000280407	28.348	0.836233	0.310155	2.69618	0.00701403	0.0182301	AC132872.4
ENSG00000133302	441.512	-0.910804	0.090154	-10.1028	5.37e-24	1.04e-22	SLF1		ENSG00000165030	500.906	0.836702	0.106796	7.83456	4.7e-15	5.07e-14	NFIL3
ENSG00000168404	180.6	-0.910676	0.131447	-6.92807	4.27e-12	3.6e-11	MLKL		ENSG00000206573	402.89	0.836982	0.0902716	9.27181	1.83e-20	2.85e-19	THUMPD3-AS1
ENSG00000141858	1062.9	-0.909225	0.0633014	-14.3634	8.78e-47	5.13e-45	SAMD1		ENSG00000177337	32.9942	0.837854	0.306385	2.73464	0.0062448	0.016447	DLGAP1-AS1
ENSG00000106852	348.837	-0.909206	0.110657	-8.21641	2.1e-16	2.49e-15	LHX6		ENSG00000187987	94.2689	0.838632	0.203987	4.11119	3.94e-05	0.000156752	ZSCAN23
ENSG00000134369	453.951	-0.909012	0.0919394	-9.88708	4.74e-23	8.63e-22	NAV1		ENSG00000250486	145.65	0.840059	0.166188	5.05486	4.31e-07	2.21e-06	FAM218A
ENSG00000134463	890.662	-0.908983	0.0703275	-12.925	3.25e-38	1.29e-36	ECHDC3		ENSG00000137801	196.526	0.840678	0.12089	6.95405	3.55e-12	3.02e-11	THBS1
ENSG00000164062	5634.37	-0.908923	0.031706	-28.6672	9.79e-181	1.41e-177	APEH		ENSG00000232546	66.5406	0.841061	0.227194	3.70195	0.00021395	0.000756458	AC027644.1
ENSG00000156970	1235.11	-0.90875	0.0759046	-11.9723	4.97e-33	1.54e-31	BUB1B		ENSG00000230189	137.154	0.841179	0.147379	5.70758	1.15e-08	6.97e-08	AC008267.2
ENSG00000100364	2335.02	-0.907724	0.0541944	-16.7494	5.72e-63	6.18e-61	KIAA0930		ENSG00000025708	1367.4	0.841187	0.0656788	12.8076	1.49e-37	5.73e-36	TYMP
ENSG00000171811	54.6503	-0.907008	0.218773	-4.14589	3.38e-05	0.000136139	CFAP46		ENSG00000125531	27.9843	0.841645	0.36491	2.30645	0.0210856	0.0478578	FNDC11
ENSG00000231245	16.4719	-0.906972	0.391865	-2.3145	0.0206403	0.0469952	C1DP1		ENSG00000266904	55.0949	0.841648	0.27056	3.11076	0.00186604	0.00553828	LINC00663
ENSG00000203930	80.3818	-0.9066	0.193895	-4.67572	2.93e-06	1.36e-05	LINC00632		ENSG00000225057	62.01	0.841708	0.244144	3.44759	0.00056561	0.001864	AC012485.1
ENSG00000167703	1568.39	-0.90627	0.053894	-16.8158	1.87e-63	2.05e-61	SLC43A2		ENSG00000270276	55.6215	0.841956	0.275307	3.05825	0.00222636	0.00650634	HIST2H4B
ENSG00000072201	229.51	-0.904857	0.0985414	-9.18251	4.21e-20	6.36e-19	LNX1		ENSG00000243302	369.107	0.842055	0.127626	6.59782	4.17e-11	3.24e-10	AC018638.4
ENSG00000156140	162.04	-0.904678	0.153291	-5.9017	3.6e-09	2.32e-08	ADAMTS3		ENSG00000135842	6510.14	0.842194	0.0471976	17.844	3.22e-71	4.41e-69	NIBAN1
ENSG00000149554	1178.14	-0.904409	0.0646099	-13.998	1.6e-44	8.64e-43	CHEK1		ENSG00000258839	241.951	0.842402	0.146595	5.74647	9.11e-09	5.6e-08	MC1R
ENSG00000163006	652.363	-0.903837	0.093714	-9.64462	5.18e-22	8.81e-21	CCDC138		ENSG00000242861	63.078	0.842479	0.25174	3.34662	0.000818031	0.00261538	AL591895.1
ENSG00000179163	577.145	-0.902587	0.0868143	-10.3968	2.57e-25	5.31e-24	FUCA1		ENSG00000231010	22.4645	0.842943	0.358789	2.34941	0.018803	0.0433836	AL121672.1
ENSG00000100350	7192.38	-0.902257	0.0564464	-15.9843	1.64e-57	1.47e-55	FOXRED2		ENSG00000196951	27.9942	0.843731	0.346447	2.43538	0.0148762	0.0354242	SCOC-AS1
ENSG00000108179	6055.77	-0.901067	0.0371663	-24.2442	7.61e-130	3.87e-127	PPIF		ENSG00000174501	116.827	0.844567	0.20746	4.07099	4.68e-05	0.00018458	ANKRD36C
ENSG00000177700	2313.5	-0.900946	0.0732151	-12.3055	8.46e-35	2.87e-33	POLR2L		ENSG00000253741	49.9639	0.844629	0.264695	3.19095	0.00141804	0.0043053	LNCOC1
ENSG00000179958	1802.29	-0.900918	0.0599236	-15.0345	4.37e-51	3.04e-49	DCTPP1		ENSG00000012822	1006.61	0.844847	0.0807261	10.4656	1.24e-25	2.62e-24	CALCOCO1
ENSG00000079215	311.587	-0.898351	0.108382	-8.28877	1.14e-16	1.38e-15	SLC1A3		ENSG00000181690	135.486	0.845548	0.229243	3.68844	0.000225636	0.000794307	PLAG1
ENSG00000143494	286.208	-0.89828	0.0999607	-8.98632	2.56e-19	3.67e-18	VASH2		ENSG00000074276	46.6279	0.846346	0.26221	3.22774	0.00124772	0.00382901	CDHR2
ENSG00000136810	4982.9	-0.898257	0.0550106	-16.3288	6.16e-60	5.89e-58	TXN		ENSG00000135338	134.802	0.846488	0.179114	4.72598	2.29e-06	1.08e-05	LCA5
ENSG00000188064	592.506	-0.898	0.0824856	-10.8867	1.33e-27	3.17e-26	WNT7B		ENSG00000225345	40.8737	0.847063	0.342502	2.47316	0.0133923	0.0323063	SNX18P3
ENSG00000196715	2586.7	-0.897614	0.0399329	-22.4781	6.8e-112	2.67e-109	VKORC1L1		ENSG00000144837	51.4504	0.847457	0.253074	3.34866	0.000812039	0.00259846	PLA1A
ENSG00000137825	81.0443	-0.897424	0.200231	-4.48196	7.4e-06	3.27e-05	ITPKA		ENSG00000118096	599.129	0.848375	0.105799	8.01872	1.07e-15	1.21e-14	IFT46
ENSG00000172586	1510.1	-0.897179	0.10366	-8.65501	4.93e-18	6.53e-17	CHCHD1		ENSG00000257303	25.0305	0.848396	0.353503	2.39997	0.0163966	0.0385313	AC073896.2
ENSG00000161888	607.411	-0.896701	0.0826307	-10.8519	1.95e-27	4.59e-26	SPC24		ENSG00000226856	33.0171	0.849024	0.3049	2.7846	0.00535939	0.0143484	THORLNC
ENSG00000127084	78.5559	-0.895225	0.205747	-4.3511	1.35e-05	5.75e-05	FGD3		ENSG00000243679	257.744	0.84994	0.134939	6.29868	3e-10	2.15e-09	AC018638.5
ENSG00000164342	84.4442	-0.894773	0.171817	-5.20772	1.91e-07	1.02e-06	TLR3		ENSG00000182472	26.5466	0.850439	0.347706	2.44586	0.0144508	0.0345191	CAPN12
ENSG00000115107	818.195	-0.89456	0.0798131	-11.2082	3.72e-29	9.53e-28	STEAP3		ENSG00000133466	405.488	0.850729	0.0976154	8.71511	2.9e-18	3.91e-17	C1QTNF6
ENSG00000138030	332.765	-0.894233	0.101462	-8.81346	1.21e-18	1.68e-17	KHK		ENSG00000186409	90.9519	0.851096	0.172362	4.93783	7.9e-07	3.95e-06	CCDC30
ENSG00000160233	478.108	-0.892806	0.0846242	-10.5502	5.07e-26	1.1e-24	LRRC3		ENSG00000204681	705.977	0.851643	0.104459	8.15286	3.55e-16	4.15e-15	GABBR1
ENSG00000170860	1562.6	-0.8925	0.0994072	-8.97822	2.75e-19	3.94e-18	LSM3		ENSG00000234817	24.8003	0.851855	0.348751	2.44259	0.0145824	0.0347983	AL136309.2
ENSG00000160223	32.9347	-0.892274	0.321909	-2.77182	0.00557434	0.0148578	ICOSLG		ENSG00000166343	28.7374	0.852189	0.313382	2.71933	0.00654145	0.0171273	MSS51
ENSG00000204394	5533.9	-0.892085	0.0630767	-14.1429	2.07e-45	1.15e-43	VARS		ENSG00000069493	90.4697	0.852268	0.179458	4.74913	2.04e-06	9.71e-06	CLEC2D
ENSG00000153044	1337.29	-0.892056	0.0682453	-13.0713	4.8e-39	1.99e-37	CENPH		ENSG00000231890	50.7498	0.852648	0.251628	3.38852	0.000702714	0.00227429	DARS-AS1
ENSG00000173868	44.7916	-0.890994	0.265472	-3.35626	0.000790044	0.00253215	PHOSPHO1		ENSG00000237437	22.6632	0.853155	0.352283	2.42179	0.0154443	0.0365655	ASS1P12
ENSG00000136280	896.705	-0.890139	0.0631717	-14.0908	4.33e-45	2.39e-43	CCM2		ENSG00000186583	74.3365	0.853159	0.261447	3.26323	0.00110151	0.00342454	SPATC1
ENSG00000134716	83.8788	-0.889698	0.224422	-3.96439	7.36e-05	0.000281067	CYP2J2		ENSG00000075790	2706.09	0.853761	0.0521581	16.3687	3.2e-60	3.11e-58	BCAP29
ENSG00000050344	391.836	-0.889085	0.0910398	-9.76588	1.58e-22	2.79e-21	NFE2L3		ENSG00000238083	280.333	0.854146	0.129624	6.58942	4.42e-11	3.43e-10	LRRC37A2
ENSG00000114631	4973.42	-0.889076	0.0470815	-18.8837	1.55e-79	2.85e-77	PODXL2		ENSG00000269867	42.1515	0.854369	0.362341	2.35792	0.0183779	0.0425239	AC010326.3
ENSG00000268798	26.559	-0.888268	0.351603	-2.52634	0.0115258	0.0282348	AC027307.3		ENSG00000167984	54.3512	0.855756	0.234271	3.65284	0.000259355	0.000905142	NLRC3
ENSG00000197258	101.652	-0.888261	0.193442	-4.59188	4.39e-06	2e-05	EIF4BP6		ENSG00000119686	104.231	0.855875	0.189558	4.51512	6.33e-06	2.82e-05	FLVCR2
ENSG00000137700	1393.62	-0.887886	0.0641767	-13.835	1.57e-43	8.09e-42	SLC37A4		ENSG00000240053	46.5687	0.85595	0.273692	3.12742	0.00176346	0.0052543	LY6G5B
ENSG00000176912	119.264	-0.887819	0.145862	-6.08669	1.15e-09	7.79e-09	TYMSOS		ENSG00000215417	108.773	0.85645	0.249278	3.43572	0.000590986	0.00194244	MIR17HG
ENSG00000188677	1172.07	-0.887693	0.071053	-12.4934	8.11e-36	2.88e-34	PARVB		ENSG00000263597	39.9244	0.856925	0.283277	3.02504	0.00248602	0.00718495	MIR3936
ENSG00000159259	1207	-0.887246	0.0570614	-15.549	1.62e-54	1.28e-52	CHAF1B		ENSG00000185101	219.925	0.858807	0.136813	6.27723	3.45e-10	2.46e-09	ANO9
ENSG00000224051	2242.49	-0.88709	0.0804327	-11.029	2.77e-28	6.82e-27	CPTP		ENSG00000183718	610.125	0.860339	0.071753	11.9903	4e-33	1.24e-31	TRIM52
ENSG00000173221	161.6	-0.886433	0.167601	-5.28895	1.23e-07	6.75e-07	GLRX		ENSG00000185105	33.5469	0.860453	0.329115	2.61444	0.00893729	0.0225921	MYADML2
ENSG00000253626	32.4934	-0.886365	0.321814	-2.75427	0.00588225	0.0155856	EIF5AL1		ENSG00000003756	2103.37	0.861421	0.0586818	14.6795	8.72e-49	5.53e-47	RBM5
ENSG00000117983	27.8637	-0.886143	0.382265	-2.31814	0.0204418	0.0466211	MUC5B		ENSG00000186009	28.3359	0.861609	0.312514	2.75703	0.00583293	0.0154755	ATP4B
ENSG00000072422	193.42	-0.885726	0.157786	-5.61348	1.98e-08	1.18e-07	RHOBTB1		ENSG00000251595	34.1696	0.862158	0.331369	2.60181	0.00927338	0.0233415	ABCA11P
ENSG00000129219	1019.31	-0.885538	0.0635627	-13.9317	4.06e-44	2.14e-42	PLD2		ENSG00000172460	52.7315	0.862468	0.369987	2.33108	0.0197493	0.0452492	PRSS30P
ENSG00000078124	1023.85	-0.884801	0.0597057	-14.8194	1.1e-49	7.11e-48	ACER3		ENSG00000130766	5497.98	0.862551	0.0637109	13.5385	9.26e-42	4.45e-40	SESN2
ENSG00000171241	720.143	-0.88405	0.0801783	-11.0261	2.86e-28	7.03e-27	SHCBP1		ENSG00000280927	264.005	0.862822	0.162998	5.29345	1.2e-07	6.59e-07	CTBP1-AS
ENSG00000176170	378.476	-0.883619	0.0974061	-9.0715	1.17e-19	1.72e-18	SPHK1		ENSG00000144395	182.322	0.862839	0.179981	4.79406	1.63e-06	7.86e-06	CCDC150
ENSG00000175344	105.938	-0.883441	0.161637	-5.4656	4.61e-08	2.65e-07	CHRNA7		ENSG00000171988	2578.12	0.863452	0.0422998	20.4127	1.29e-92	3.38e-90	JMJD1C
ENSG00000142149	162.385	-0.883328	0.173673	-5.08614	3.65e-07	1.9e-06	HUNK		ENSG00000225177	239.011	0.86358	0.213124	4.052	5.08e-05	0.000199015	AL590617.2
ENSG00000250899	223.886	-0.883192	0.141248	-6.25276	4.03e-10	2.85e-09	AC125807.2		ENSG00000127481	5015.14	0.864352	0.0705225	12.2564	1.55e-34	5.2e-33	UBR4
ENSG00000166451	5147.51	-0.883047	0.0580168	-15.2205	2.58e-52	1.89e-50	CENPN		ENSG00000154803	1231.86	0.864535	0.0570139	15.1636	6.16e-52	4.43e-50	FLCN
ENSG00000113048	4568.38	-0.881721	0.0521025	-16.9228	3.05e-64	3.5e-62	MRPS27		ENSG00000228451	79.4261	0.864614	0.205769	4.20187	2.65e-05	0.000108027	SDAD1P1
ENSG00000130768	551.791	-0.881309	0.0955719	-9.22142	2.93e-20	4.48e-19	SMPDL3B		ENSG00000181804	42.9752	0.864789	0.343248	2.51943	0.0117546	0.0287465	SLC9A9
ENSG00000183943	978.351	-0.880652	0.0702241	-12.5406	4.48e-36	1.61e-34	PRKX		ENSG00000164188	54.1813	0.865306	0.273521	3.16358	0.00155843	0.00469609	RANBP3L
ENSG00000138796	2332.29	-0.880405	0.048443	-18.174	8.29e-74	1.21e-71	HADH		ENSG00000245573	39.5596	0.865374	0.377952	2.28964	0.0220423	0.0497025	BDNF-AS
ENSG00000185760	262.31	-0.879651	0.124133	-7.08637	1.38e-12	1.22e-11	KCNQ5		ENSG00000111860	273.914	0.866643	0.139246	6.22385	4.85e-10	3.39e-09	CEP85L
ENSG00000184076	2364.7	-0.879415	0.122446	-7.18206	6.87e-13	6.26e-12	UQCR10		ENSG00000269737	32.3562	0.867087	0.335802	2.58214	0.00981898	0.0245574	AL691432.1
ENSG00000156113	2126.49	-0.879331	0.05043	-17.4367	4.35e-68	5.63e-66	KCNMA1		ENSG00000221818	32.9781	0.867141	0.361969	2.39563	0.016592	0.038927	EBF2
ENSG00000107130	2083.91	-0.878683	0.0630167	-13.9437	3.44e-44	1.81e-42	NCS1		ENSG00000162461	56.7167	0.867747	0.300386	2.88878	0.00386745	0.0107299	SLC25A34
ENSG00000204580	4132.82	-0.877775	0.0557948	-15.7322	9.1e-56	7.6e-54	DDR1		ENSG00000240291	59.5388	0.868363	0.229401	3.78535	0.000153494	0.000555052	AL450384.2
ENSG00000154518	5976.53	-0.87743	0.0523885	-16.7485	5.81e-63	6.24e-61	ATP5MC3		ENSG00000186141	1292.45	0.868706	0.0705518	12.313	7.71e-35	2.63e-33	POLR3C
ENSG00000065054	1790.69	-0.876046	0.0656671	-13.3407	1.34e-40	6.01e-39	SLC9A3R2		ENSG00000132170	192.084	0.869266	0.15562	5.58581	2.33e-08	1.38e-07	PPARG
ENSG00000104951	32.2634	-0.874142	0.316191	-2.7646	0.00569928	0.0151472	IL4I1		ENSG00000146267	157.686	0.871308	0.19546	4.45772	8.28e-06	3.64e-05	FAXC
ENSG00000279673	47.7056	-0.87341	0.258073	-3.38435	0.000713462	0.00230638	AC092919.2		ENSG00000172183	351.795	0.871395	0.121877	7.14979	8.69e-13	7.86e-12	ISG20
ENSG00000188368	35.5977	-0.872455	0.319154	-2.73365	0.00626365	0.0164916	PRR19		ENSG00000158571	35.7582	0.871423	0.286425	3.04241	0.00234695	0.00681951	PFKFB1
ENSG00000174473	43.3779	-0.871947	0.28305	-3.08054	0.00206624	0.00608369	GALNTL6		ENSG00000162620	60.8866	0.871695	0.309101	2.82009	0.00480095	0.0130038	LRRIQ3
ENSG00000153064	94.8089	-0.871861	0.164183	-5.31031	1.09e-07	6.03e-07	BANK1		ENSG00000147118	152.09	0.872629	0.179278	4.86746	1.13e-06	5.55e-06	ZNF182
ENSG00000092470	670.38	-0.870518	0.0763765	-11.3977	4.29e-30	1.15e-28	WDR76		ENSG00000188818	247.975	0.872689	0.130946	6.66447	2.66e-11	2.1e-10	ZDHHC11
ENSG00000204267	494.22	-0.868571	0.0902732	-9.62158	6.48e-22	1.1e-20	TAP2		ENSG00000257270	109.776	0.873346	0.182558	4.78395	1.72e-06	8.24e-06	AL928654.2
ENSG00000132004	462.99	-0.868262	0.100505	-8.63899	5.67e-18	7.49e-17	FBXW9		ENSG00000269982	51.2465	0.873515	0.250583	3.48593	0.000490432	0.00163454	AC018809.2
ENSG00000106327	562.647	-0.866711	0.0768773	-11.274	1.76e-29	4.6e-28	TFR2		ENSG00000268713	38.122	0.873659	0.293281	2.97891	0.00289272	0.00823182	AC005261.3
ENSG00000115255	842.577	-0.86581	0.0942756	-9.18382	4.16e-20	6.29e-19	REEP6		ENSG00000261360	45.0898	0.873681	0.291489	2.9973	0.0027238	0.00779652	AC010491.1
ENSG00000170779	1060.65	-0.864294	0.0665676	-12.9837	1.51e-38	6.12e-37	CDCA4		ENSG00000101188	70.1775	0.87382	0.266958	3.27325	0.00106317	0.00331845	NTSR1
ENSG00000204516	66.7539	-0.86398	0.278179	-3.10584	0.00189742	0.00562561	MICB		ENSG00000174672	298.549	0.873899	0.142113	6.14932	7.78e-10	5.34e-09	BRSK2
ENSG00000277879	29.8619	-0.863662	0.359011	-2.40567	0.0161428	0.0380107	AL391988.1		ENSG00000096093	460.936	0.874328	0.0892858	9.79246	1.21e-22	2.16e-21	EFHC1
ENSG00000114248	240.367	-0.8636	0.131531	-6.56576	5.18e-11	3.99e-10	LRRC31		ENSG00000163623	83.0581	0.874665	0.345497	2.53161	0.0113539	0.0278638	NKX6-1
ENSG00000093010	6063.99	-0.863488	0.0490573	-17.6016	2.39e-69	3.16e-67	COMT		ENSG00000238105	473.035	0.875008	0.0919524	9.51588	1.8e-21	2.98e-20	GOLGA2P5
ENSG00000182481	3553.07	-0.863009	0.050386	-17.128	9.18e-66	1.11e-63	KPNA2		ENSG00000138834	1740.8	0.875151	0.0661749	13.2248	6.31e-40	2.74e-38	MAPK8IP3
ENSG00000104154	3767.61	-0.86261	0.0518057	-16.6509	2.98e-62	3.05e-60	SLC30A4		ENSG00000154162	78.3861	0.875197	0.231553	3.77968	0.000157032	0.000566658	CDH12
ENSG00000109861	959.247	-0.862322	0.0658075	-13.1037	3.14e-39	1.31e-37	CTSC		ENSG00000270605	72.2855	0.875409	0.216335	4.04655	5.2e-05	0.000203307	AL353622.1
ENSG00000112414	13714	-0.861982	0.0386763	-22.2871	4.93e-110	1.88e-107	ADGRG6		ENSG00000112276	394.013	0.875816	0.115688	7.57049	3.72e-14	3.75e-13	BVES
ENSG00000154447	1323.95	-0.861879	0.0566288	-15.2198	2.61e-52	1.91e-50	SH3RF1		ENSG00000186364	51.2687	0.877041	0.280822	3.12312	0.00178944	0.00532496	NUDT17
ENSG00000159231	102.542	-0.860875	0.174957	-4.92051	8.63e-07	4.29e-06	CBR3		ENSG00000235453	47.0297	0.877096	0.272968	3.21319	0.00131271	0.0040123	SMIM27
ENSG00000104524	1215.79	-0.860621	0.063034	-13.6533	1.93e-42	9.54e-41	PYCR3		ENSG00000230715	193.813	0.877776	0.153948	5.70176	1.19e-08	7.2e-08	AC018638.2
ENSG00000254087	559.578	-0.860508	0.0881948	-9.7569	1.72e-22	3.03e-21	LYN		ENSG00000270189	104.715	0.878099	0.203465	4.31572	1.59e-05	6.69e-05	#N/A
ENSG00000196358	25.2258	-0.85862	0.353879	-2.42631	0.0152534	0.0361597	NTNG2		ENSG00000277758	59.8905	0.879366	0.341618	2.57412	0.0100494	0.0250419	FO681492.1
ENSG00000124496	930.958	-0.856917	0.087727	-9.768	1.54e-22	2.73e-21	TRERF1		ENSG00000139269	358.58	0.879779	0.123673	7.11372	1.13e-12	1.01e-11	INHBE
ENSG00000084444	825.641	-0.856826	0.06992	-12.2544	1.59e-34	5.33e-33	FAM234B		ENSG00000179598	129.764	0.879833	0.28871	3.04746	0.00230786	0.00671865	PLD6
ENSG00000183765	556.258	-0.855349	0.0786057	-10.8815	1.41e-27	3.34e-26	CHEK2		ENSG00000123636	404.73	0.880728	0.106205	8.29271	1.11e-16	1.34e-15	BAZ2B
ENSG00000272068	41.7643	-0.855306	0.258491	-3.30884	0.000936837	0.00295836	AL365181.2		ENSG00000248498	592.877	0.881262	0.0865863	10.1779	2.49e-24	4.9e-23	ASNSP1
ENSG00000128567	1926.26	-0.851777	0.0809455	-10.5228	6.78e-26	1.46e-24	PODXL		ENSG00000163959	298.086	0.881985	0.101467	8.6923	3.55e-18	4.75e-17	SLC51A
ENSG00000162073	666.687	-0.851709	0.0973303	-8.7507	2.12e-18	2.88e-17	PAQR4		ENSG00000250959	117.135	0.883701	0.178242	4.95787	7.13e-07	3.58e-06	GLUD1P3
ENSG00000075188	570.873	-0.851266	0.0842223	-10.1074	5.12e-24	9.91e-23	NUP37		ENSG00000137691	75.3549	0.884045	0.232828	3.79699	0.000146466	0.000532081	CFAP300
ENSG00000238005	46.1192	-0.850804	0.24571	-3.46264	0.000534905	0.00176934	AL391832.2		ENSG00000256304	28.1253	0.88429	0.33863	2.61138	0.00901783	0.0227713	#N/A
ENSG00000135423	124.295	-0.850482	0.148297	-5.735	9.75e-09	5.98e-08	GLS2		ENSG00000213513	23.0804	0.884503	0.37685	2.34709	0.0189205	0.0436315	IMPDH1P5
ENSG00000006607	2111.89	-0.849991	0.0435658	-19.5105	8.94e-85	1.84e-82	FARP2		ENSG00000231937	31.2697	0.885629	0.315106	2.81058	0.00494527	0.0133611	AC116666.1
ENSG00000233954	277.418	-0.849778	0.137384	-6.18545	6.19e-10	4.3e-09	UQCRHL		ENSG00000271664	47.5225	0.886101	0.250251	3.54085	0.000398846	0.00134979	AC004890.3
ENSG00000179271	2055.81	-0.849616	0.0590554	-14.3868	6.27e-47	3.69e-45	GADD45GIP1		ENSG00000214837	24.4606	0.886991	0.354234	2.50397	0.0122808	0.0299062	LINC01347
ENSG00000187210	911.598	-0.849355	0.0630263	-13.4762	2.16e-41	1.02e-39	GCNT1		ENSG00000265417	34.9975	0.887169	0.272686	3.25344	0.00114016	0.00353323	AP005119.2
ENSG00000169598	549.526	-0.848407	0.0769017	-11.0324	2.67e-28	6.58e-27	DFFB		ENSG00000259065	59.9368	0.887804	0.233396	3.80384	0.000142468	0.000518653	AC005520.2
ENSG00000229056	87.3871	-0.847936	0.274363	-3.09056	0.00199776	0.00589949	HECW2-AS1		ENSG00000166813	401.864	0.888638	0.155054	5.73114	9.98e-09	6.11e-08	KIF7
ENSG00000180817	3767.17	-0.84703	0.0390238	-21.7055	1.82e-104	6.55e-102	PPA1		ENSG00000189056	77.2229	0.88921	0.206741	4.30109	1.7e-05	7.12e-05	RELN
ENSG00000158882	797.224	-0.846153	0.0640028	-13.2206	6.68e-40	2.89e-38	TOMM40L		ENSG00000278041	97.8824	0.890378	0.253357	3.51432	0.000440878	0.00148197	AL133325.3
ENSG00000115884	909.067	-0.8461	0.0638524	-13.2509	4.46e-40	1.96e-38	SDC1		ENSG00000143882	39.8279	0.890975	0.332781	2.67736	0.00742044	0.0191653	ATP6V1C2
ENSG00000035862	978.66	-0.845473	0.0867341	-9.74787	1.88e-22	3.3e-21	TIMP2		ENSG00000235706	213.882	0.891047	0.135747	6.56402	5.24e-11	4.04e-10	DICER1-AS1
ENSG00000134627	140.881	-0.845276	0.131482	-6.42885	1.29e-10	9.54e-10	PIWIL4		ENSG00000082512	406.089	0.892107	0.101961	8.74949	2.14e-18	2.91e-17	TRAF5
ENSG00000010278	8422.56	-0.845059	0.0456819	-18.4988	2.11e-76	3.49e-74	CD9		ENSG00000198040	1474.47	0.892548	0.0606412	14.7185	4.9e-49	3.12e-47	ZNF84
ENSG00000051382	2344.49	-0.844563	0.0470253	-17.9598	4.03e-72	5.7e-70	PIK3CB		ENSG00000272849	67.1572	0.892584	0.270387	3.30113	0.000962966	0.00303053	AC084018.1
ENSG00000214160	1469.02	-0.844511	0.094826	-8.9059	5.3e-19	7.47e-18	ALG3		ENSG00000150527	258.421	0.893153	0.115809	7.71231	1.24e-14	1.29e-13	MIA2
ENSG00000204220	1225.69	-0.843857	0.0775488	-10.8816	1.41e-27	3.33e-26	PFDN6		ENSG00000226174	82.6053	0.893393	0.190568	4.68805	2.76e-06	1.29e-05	TEX22
ENSG00000183273	27.8273	-0.843724	0.331761	-2.54317	0.0109852	0.027064	CCDC60		ENSG00000186104	786.44	0.894589	0.0734787	12.1748	4.23e-34	1.39e-32	CYP2R1
ENSG00000091986	235.378	-0.843086	0.109116	-7.72654	1.11e-14	1.16e-13	CCDC80		ENSG00000224940	72.2402	0.894727	0.303122	2.95171	0.00316018	0.00891948	PRRT4
ENSG00000100304	5281.73	-0.842225	0.051379	-16.3924	2.17e-60	2.11e-58	TTLL12		ENSG00000210135	2615.6	0.896063	0.0875163	10.2388	1.33e-24	2.66e-23	MT-TN
ENSG00000152413	1044.43	-0.842086	0.0597177	-14.1011	3.74e-45	2.07e-43	HOMER1		ENSG00000161011	9011.72	0.896618	0.0533581	16.8038	2.29e-63	2.48e-61	SQSTM1
ENSG00000187808	41.8298	-0.841269	0.280881	-2.99511	0.00274345	0.0078415	SOWAHD		ENSG00000156804	87.3864	0.896675	0.253507	3.53708	0.000404574	0.00136792	FBXO32
ENSG00000172159	61.5762	-0.840589	0.205454	-4.09137	4.29e-05	0.000170015	FRMD3		ENSG00000171649	33.9219	0.897232	0.300833	2.98249	0.00285915	0.00814435	ZIK1
ENSG00000067225	20830.6	-0.840042	0.069011	-12.1726	4.35e-34	1.42e-32	PKM		ENSG00000186446	149.571	0.897546	0.197278	4.54966	5.37e-06	2.42e-05	ZNF501
ENSG00000140718	1456.14	-0.839167	0.0547775	-15.3196	5.66e-53	4.24e-51	FTO		ENSG00000012171	487.383	0.897656	0.0872138	10.2926	7.61e-25	1.54e-23	SEMA3B
ENSG00000142875	983.233	-0.839003	0.0640092	-13.1075	2.98e-39	1.25e-37	PRKACB		ENSG00000281896	83.1813	0.898286	0.196304	4.57599	4.74e-06	2.15e-05	AC018638.8
ENSG00000185480	791.422	-0.838484	0.0704976	-11.8938	1.27e-32	3.88e-31	PARPBP		ENSG00000158966	381.808	0.898304	0.143811	6.24644	4.2e-10	2.96e-09	CACHD1
ENSG00000123219	452.582	-0.837376	0.0978783	-8.55527	1.18e-17	1.52e-16	CENPK		ENSG00000259848	229.44	0.899028	0.155992	5.76331	8.25e-09	5.1e-08	AC097374.1
ENSG00000122952	1899.36	-0.837054	0.0829929	-10.0858	6.38e-24	1.23e-22	ZWINT		ENSG00000083097	623.676	0.899511	0.0868456	10.3576	3.87e-25	7.93e-24	DOP1A
ENSG00000196262	30354.5	-0.836349	0.0525507	-15.9151	4.98e-57	4.37e-55	PPIA		ENSG00000234585	121.64	0.900264	0.171545	5.24798	1.54e-07	8.34e-07	CCT6P3
ENSG00000232472	33.8084	-0.836309	0.344942	-2.42449	0.0153298	0.0363242	EEF1B2P3		ENSG00000167785	29.8039	0.90078	0.339323	2.65464	0.00793925	0.0203633	ZNF558
ENSG00000167325	3115.31	-0.836123	0.0559471	-14.9449	1.68e-50	1.14e-48	RRM1		ENSG00000175040	167.485	0.900799	0.136543	6.59717	4.19e-11	3.26e-10	CHST2
ENSG00000137486	967.521	-0.835826	0.07156	-11.6801	1.61e-31	4.68e-30	ARRB1		ENSG00000123609	124.623	0.900857	0.162168	5.55507	2.77e-08	1.63e-07	NMI
ENSG00000279443	48.0894	-0.835588	0.233971	-3.57133	0.000355175	0.00121117	AL513497.1		ENSG00000128596	827.67	0.901331	0.0761709	11.833	2.64e-32	7.91e-31	CCDC136
ENSG00000188486	3542.24	-0.83555	0.0883666	-9.45549	3.22e-21	5.24e-20	H2AFX		ENSG00000260193	32.9776	0.902125	0.37467	2.40779	0.0160496	0.0378291	LINC02846
ENSG00000067113	3799.85	-0.835405	0.0588876	-14.1864	1.11e-45	6.25e-44	PLPP1		ENSG00000178498	189.152	0.902687	0.190907	4.72842	2.26e-06	1.07e-05	DTX3
ENSG00000167553	3692.43	-0.835243	0.0531212	-15.7233	1.05e-55	8.69e-54	TUBA1C		ENSG00000179008	60.4333	0.904541	0.229812	3.936	8.28e-05	0.000313597	C14orf39
ENSG00000108468	3430.89	-0.835139	0.0399845	-20.8866	7.1e-97	2.12e-94	CBX1		ENSG00000196628	186.45	0.904917	0.194731	4.647	3.37e-06	1.55e-05	TCF4
ENSG00000116161	3402.81	-0.83502	0.0548486	-15.2241	2.45e-52	1.8e-50	CACYBP		ENSG00000119771	823.458	0.905685	0.0877001	10.3271	5.32e-25	1.09e-23	KLHL29
ENSG00000131473	11395.1	-0.834816	0.0555268	-15.0345	4.37e-51	3.04e-49	ACLY		ENSG00000169629	70.0744	0.905832	0.271159	3.34059	0.000836006	0.00266758	RGPD8
ENSG00000106330	1113.69	-0.83383	0.0792836	-10.517	7.21e-26	1.55e-24	MOSPD3		ENSG00000107485	108.157	0.907515	0.257913	3.51869	0.00043368	0.00146004	GATA3
ENSG00000240449	159.937	-0.833468	0.13694	-6.08637	1.16e-09	7.81e-09	AC005586.1		ENSG00000087077	1016.23	0.907812	0.0906645	10.0129	1.34e-23	2.52e-22	TRIP6
ENSG00000276975	21.9844	-0.833428	0.348607	-2.39074	0.0168145	0.0393885	HYDIN2		ENSG00000153132	5010.67	0.90845	0.0852695	10.6539	1.67e-26	3.74e-25	CLGN
ENSG00000133321	58.0158	-0.83336	0.223111	-3.73518	0.000187578	0.00066915	PLAAT4		ENSG00000275223	92.4998	0.90859	0.232244	3.91222	9.15e-05	0.000343548	AL121906.2
ENSG00000188807	1159.16	-0.832995	0.102661	-8.11401	4.9e-16	5.65e-15	TMEM201		ENSG00000180535	556.164	0.908865	0.124299	7.31193	2.63e-13	2.49e-12	BHLHA15
ENSG00000128886	83.8535	-0.832754	0.227534	-3.65991	0.000252304	0.000882433	ELL3		ENSG00000163513	50.4301	0.909128	0.353121	2.57455	0.010037	0.0250181	TGFBR2
ENSG00000198951	1337.85	-0.832138	0.0641872	-12.9642	1.95e-38	7.84e-37	NAGA		ENSG00000169302	43.7568	0.909267	0.260222	3.4942	0.00047548	0.00158962	STK32A
ENSG00000221829	908.436	-0.831516	0.0650672	-12.7793	2.14e-37	8.15e-36	FANCG		ENSG00000269893	1648.08	0.909612	0.0985281	9.23201	2.66e-20	4.08e-19	SNHG8
ENSG00000119013	1305.33	-0.830995	0.112644	-7.37717	1.62e-13	1.56e-12	NDUFB3		ENSG00000269958	176.091	0.910383	0.151934	5.99197	2.07e-09	1.37e-08	AL049840.5
ENSG00000124466	56.9497	-0.830402	0.228946	-3.62707	0.000286657	0.000992536	LYPD3		ENSG00000187172	222.055	0.91126	0.133514	6.82518	8.78e-12	7.23e-11	BAGE2
ENSG00000197444	534.481	-0.830375	0.0997851	-8.32164	8.68e-17	1.05e-15	OGDHL		ENSG00000255142	34.3373	0.911479	0.295926	3.08009	0.00206938	0.00609224	AP006621.2
ENSG00000183431	3156.01	-0.829752	0.0418459	-19.8287	1.68e-87	3.73e-85	SF3A3		ENSG00000135164	1777.43	0.912313	0.048689	18.7376	2.45e-78	4.28e-76	DMTF1
ENSG00000131351	285.097	-0.829111	0.11474	-7.22598	4.97e-13	4.6e-12	HAUS8		ENSG00000172748	71.4633	0.912592	0.202226	4.51273	6.4e-06	2.85e-05	ZNF596
ENSG00000172936	486.363	-0.828129	0.0848548	-9.75936	1.68e-22	2.96e-21	MYD88		ENSG00000281490	723.748	0.91299	0.0912267	10.0079	1.41e-23	2.65e-22	CICP14
ENSG00000259781	943.125	-0.827854	0.0894421	-9.25575	2.13e-20	3.29e-19	HMGB1P6		ENSG00000144674	1227.54	0.91474	0.0613234	14.9167	2.57e-50	1.73e-48	GOLGA4
ENSG00000164818	1610.31	-0.826955	0.0732005	-11.2971	1.36e-29	3.55e-28	DNAAF5		ENSG00000279088	346.392	0.915467	0.113738	8.0489	8.35e-16	9.5e-15	AC022400.6
ENSG00000166133	531.145	-0.82666	0.084541	-9.77821	1.4e-22	2.48e-21	RPUSD2		ENSG00000010810	934.319	0.915756	0.0694204	13.1915	9.83e-40	4.24e-38	FYN
ENSG00000160211	1595.95	-0.826436	0.0722875	-11.4326	2.87e-30	7.82e-29	G6PD		ENSG00000132938	34.484	0.916397	0.304606	3.00847	0.0026257	0.00754406	MTUS2
ENSG00000160949	1390.38	-0.826332	0.0617407	-13.3839	7.51e-41	3.43e-39	TONSL		ENSG00000279738	44.0562	0.916794	0.304797	3.00788	0.00263075	0.00755436	AL022311.1
ENSG00000198346	182.58	-0.825668	0.133685	-6.17624	6.56e-10	4.55e-09	ZNF813		ENSG00000168679	32.2066	0.916927	0.347018	2.6423	0.00823445	0.0210164	SLC16A4
ENSG00000223478	371.492	-0.825266	0.10338	-7.98286	1.43e-15	1.6e-14	AL441992.1		ENSG00000176732	34.5981	0.916948	0.359901	2.54778	0.010841	0.0267546	PFN4
ENSG00000239672	1058.57	-0.824839	0.100684	-8.19235	2.56e-16	3.02e-15	NME1		ENSG00000049540	109.32	0.917303	0.158651	5.7819	7.39e-09	4.59e-08	ELN
ENSG00000128536	109.532	-0.824642	0.172403	-4.78323	1.72e-06	8.27e-06	CDHR3		ENSG00000276334	23.9811	0.918744	0.367126	2.50253	0.0123308	0.0300112	AL133243.2
ENSG00000253978	58.7634	-0.823978	0.258038	-3.19325	0.00140683	0.00427628	AC026689.1		ENSG00000197093	35.375	0.919833	0.304239	3.02339	0.0024996	0.00721857	GAL3ST4
ENSG00000124507	769.155	-0.822649	0.0928616	-8.85888	8.08e-19	1.13e-17	PACSIN1		ENSG00000125731	63.9767	0.920056	0.231714	3.97065	7.17e-05	0.000274511	SH2D3A
ENSG00000176619	6328.73	-0.821724	0.0400963	-20.4938	2.45e-93	6.82e-91	LMNB2		ENSG00000102935	42.0625	0.92042	0.377501	2.43819	0.0147609	0.0351821	ZNF423
ENSG00000102898	2710.7	-0.821608	0.0390302	-21.0506	2.26e-98	7.14e-96	NUTF2		ENSG00000254838	19.6046	0.92045	0.392921	2.34258	0.0191508	0.0440842	GVINP1
ENSG00000064655	121.892	-0.820858	0.270762	-3.03166	0.00243211	0.00703857	EYA2		ENSG00000131398	222.905	0.920663	0.139688	6.59084	4.37e-11	3.4e-10	KCNC3
ENSG00000058091	1951.45	-0.820015	0.0539873	-15.189	4.18e-52	3.02e-50	CDK14		ENSG00000250903	124.882	0.921166	0.164553	5.59798	2.17e-08	1.29e-07	GMDS-DT
ENSG00000064547	288.433	-0.819914	0.116738	-7.02353	2.16e-12	1.88e-11	LPAR2		ENSG00000116793	134.143	0.921375	0.210127	4.38485	1.16e-05	4.98e-05	PHTF1
ENSG00000162062	537.565	-0.819676	0.0869332	-9.4288	4.15e-21	6.71e-20	TEDC2		ENSG00000277496	220.238	0.922051	0.13033	7.07472	1.5e-12	1.32e-11	AL357033.4
ENSG00000146670	1718.6	-0.818501	0.0616311	-13.2806	3e-40	1.33e-38	CDCA5		ENSG00000130066	3634.81	0.923011	0.0621115	14.8606	5.94e-50	3.9e-48	SAT1
ENSG00000077585	102.677	-0.818493	0.18867	-4.33823	1.44e-05	6.08e-05	GPR137B		ENSG00000136235	89.4081	0.923071	0.187374	4.92636	8.38e-07	4.17e-06	GPNMB
ENSG00000168505	27.653	-0.818399	0.34015	-2.406	0.0161284	0.0379839	GBX2		ENSG00000064763	292.955	0.923193	0.132556	6.96457	3.29e-12	2.81e-11	FAR2
ENSG00000160767	2493.88	-0.817641	0.074146	-11.0275	2.82e-28	6.93e-27	FAM189B		ENSG00000089847	256.057	0.925413	0.148469	6.23304	4.57e-10	3.21e-09	ANKRD24
ENSG00000213965	2533.79	-0.817547	0.0648075	-12.615	1.75e-36	6.42e-35	NUDT19		ENSG00000130684	117.537	0.92563	0.180644	5.12405	2.99e-07	1.57e-06	ZNF337
ENSG00000062485	9365.36	-0.816727	0.0661044	-12.3551	4.57e-35	1.57e-33	CS		ENSG00000118997	46.5298	0.92581	0.294276	3.14607	0.00165483	0.00496314	DNAH7
ENSG00000179362	280.45	-0.8163	0.105467	-7.73985	9.95e-15	1.05e-13	HMGN2P46		ENSG00000185946	435.86	0.925895	0.104364	8.87181	7.2e-19	1.01e-17	RNPC3
ENSG00000198039	430.344	-0.816255	0.0798833	-10.2181	1.65e-24	3.28e-23	ZNF273		ENSG00000149289	243.038	0.925951	0.12598	7.35001	1.98e-13	1.9e-12	ZC3H12C
ENSG00000168077	205.17	-0.816063	0.135653	-6.0158	1.79e-09	1.19e-08	SCARA3		ENSG00000114857	2486.8	0.926541	0.0735842	12.5916	2.35e-36	8.55e-35	NKTR
ENSG00000108556	69.7168	-0.815474	0.220326	-3.70122	0.000214562	0.000758415	CHRNE		ENSG00000273137	50.648	0.927121	0.285262	3.25007	0.00115377	0.00356816	AL022328.2
ENSG00000265579	99.155	-0.815384	0.162632	-5.01368	5.34e-07	2.72e-06	AC023301.1		ENSG00000276449	23.9253	0.927659	0.355965	2.60604	0.00915964	0.0230911	AC004076.2
ENSG00000092758	511.168	-0.815371	0.0991532	-8.22335	1.98e-16	2.35e-15	COL9A3		ENSG00000260916	740.887	0.92839	0.0785552	11.8183	3.14e-32	9.38e-31	CCPG1
ENSG00000092068	1689.28	-0.814603	0.100284	-8.12299	4.55e-16	5.26e-15	SLC7A8		ENSG00000178607	3737.98	0.929831	0.0574545	16.1838	6.56e-59	6.16e-57	ERN1
ENSG00000162636	617.687	-0.814492	0.0713056	-11.4226	3.23e-30	8.74e-29	FAM102B		ENSG00000181227	24.889	0.930557	0.392499	2.37085	0.017747	0.0412818	DLSTP1
ENSG00000183624	1290.41	-0.813957	0.0554988	-14.6662	1.06e-48	6.69e-47	HMCES		ENSG00000186301	59.7517	0.93115	0.225727	4.12512	3.71e-05	0.000148197	MST1P2
ENSG00000272405	238.957	-0.813926	0.135891	-5.98955	2.1e-09	1.39e-08	AL365181.3		ENSG00000279331	32.0325	0.932361	0.312783	2.98085	0.00287447	0.00818618	RBM12B-AS1
ENSG00000080824	33985.8	-0.813875	0.0614779	-13.2385	5.26e-40	2.3e-38	HSP90AA1		ENSG00000214776	78.9166	0.932838	0.208905	4.46537	7.99e-06	3.52e-05	AC092821.1
ENSG00000276256	105.066	-0.812845	0.179049	-4.53979	5.63e-06	2.53e-05	AC011043.1		ENSG00000085831	1119.06	0.932879	0.0689678	13.5263	1.09e-41	5.25e-40	TTC39A
ENSG00000179981	776.639	-0.811942	0.0762442	-10.6492	1.76e-26	3.93e-25	TSHZ1		ENSG00000174365	364.941	0.932993	0.0977724	9.5425	1.39e-21	2.32e-20	SNHG11
ENSG00000234311	41.2569	-0.81173	0.266633	-3.04437	0.00233168	0.00677946	AL451069.3		ENSG00000115648	3315.64	0.933472	0.0708896	13.168	1.34e-39	5.75e-38	MLPH
ENSG00000010704	197.137	-0.811377	0.138579	-5.85496	4.77e-09	3.03e-08	HFE		ENSG00000234618	28.1247	0.93368	0.368317	2.53499	0.011245	0.02762	RPSAP9
ENSG00000278558	31.774	-0.811039	0.341095	-2.37775	0.0174186	0.0406016	TMEM191B		ENSG00000163435	1009.14	0.934376	0.0772822	12.0904	1.19e-33	3.8e-32	ELF3
ENSG00000144120	518.746	-0.810967	0.0841274	-9.63975	5.43e-22	9.22e-21	TMEM177		ENSG00000088538	497.825	0.934483	0.106982	8.73493	2.44e-18	3.3e-17	DOCK3
ENSG00000164087	583.483	-0.810877	0.113745	-7.12889	1.01e-12	9.09e-12	POC1A		ENSG00000163354	212.779	0.934849	0.115764	8.07547	6.72e-16	7.68e-15	DCST2
ENSG00000241549	45.7471	-0.810212	0.249358	-3.24919	0.00115734	0.00357666	GUSBP2		ENSG00000277938	55.7524	0.934957	0.239697	3.90059	9.6e-05	0.000359286	AL035252.3
ENSG00000243069	238.848	-0.808855	0.104129	-7.76784	7.98e-15	8.46e-14	ARHGEF26-AS1		ENSG00000131781	50.338	0.935335	0.281081	3.32763	0.000875879	0.00278111	FMO5
ENSG00000143319	1993.73	-0.808125	0.0525437	-15.3801	2.23e-53	1.68e-51	ISG20L2		ENSG00000100068	244.368	0.936188	0.12996	7.20366	5.86e-13	5.38e-12	LRP5L
ENSG00000177548	977.664	-0.807063	0.0847792	-9.51959	1.74e-21	2.88e-20	RABEP2		ENSG00000230185	31.9082	0.936553	0.292378	3.20323	0.00135897	0.004141	C9orf147
ENSG00000269399	38.6937	-0.80665	0.317822	-2.53806	0.0111469	0.027413	AC008764.6		ENSG00000088836	156.284	0.936644	0.161689	5.79288	6.92e-09	4.31e-08	SLC4A11
ENSG00000125166	5293.9	-0.805829	0.0535402	-15.0509	3.41e-51	2.4e-49	GOT2		ENSG00000188199	21.3455	0.9377	0.407249	2.30252	0.0213059	0.0482744	NUTM2B
ENSG00000006695	755.413	-0.805375	0.0711507	-11.3193	1.05e-29	2.77e-28	COX10		ENSG00000185168	34.1639	0.937886	0.301807	3.10757	0.00188633	0.00559456	LINC00482
ENSG00000159403	270.747	-0.804432	0.0983395	-8.18015	2.83e-16	3.33e-15	C1R		ENSG00000145416	123.798	0.938248	0.164608	5.69989	1.2e-08	7.28e-08	36951
ENSG00000179627	1519.38	-0.804353	0.0595106	-13.5161	1.26e-41	6e-40	ZBTB42		ENSG00000163463	134.911	0.938375	0.183435	5.11556	3.13e-07	1.64e-06	KRTCAP2
ENSG00000167085	3307.39	-0.803754	0.0454955	-17.6667	7.57e-70	1.01e-67	PHB		ENSG00000219481	2171.29	0.938774	0.0500493	18.757	1.7e-78	2.99e-76	NBPF1
ENSG00000096384	27904.7	-0.802757	0.0328971	-24.4021	1.63e-131	8.6e-129	HSP90AB1		ENSG00000112773	46.1597	0.939842	0.288163	3.26149	0.00110829	0.00344436	TENT5A
ENSG00000279117	448.586	-0.802366	0.103302	-7.76716	8.03e-15	8.5e-14	AP001972.5		ENSG00000227799	22.2948	0.939957	0.400934	2.34442	0.0190567	0.0439026	AC012358.2
ENSG00000224831	33.6279	-0.802133	0.290852	-2.75787	0.00581787	0.0154371	TMEM183B		ENSG00000175894	84.2748	0.939991	0.185086	5.07866	3.8e-07	1.97e-06	TSPEAR
ENSG00000183242	44.6221	-0.800419	0.286704	-2.79179	0.00524174	0.0140668	WT1-AS		ENSG00000114423	581.206	0.941646	0.0814547	11.5604	6.54e-31	1.84e-29	CBLB
ENSG00000197380	70.5698	-0.800329	0.216863	-3.69048	0.000223828	0.000788586	DACT3		ENSG00000274840	31.5276	0.94174	0.289635	3.25148	0.00114808	0.0035531	AC132807.2
ENSG00000072657	29.7502	-0.80017	0.315886	-2.53309	0.011306	0.0277595	TRHDE		ENSG00000230102	14.2596	0.942077	0.40164	2.34558	0.0189978	0.043794	LINC02028
ENSG00000028137	22.6715	-0.799909	0.348368	-2.29616	0.0216668	0.0489838	TNFRSF1B		ENSG00000114770	1689.13	0.942805	0.0602462	15.6492	3.36e-55	2.77e-53	ABCC5
ENSG00000130829	1097.16	-0.799126	0.0697958	-11.4495	2.37e-30	6.48e-29	DUSP9		ENSG00000160323	793.712	0.943474	0.0868654	10.8613	1.76e-27	4.14e-26	ADAMTS13
ENSG00000126457	4230.04	-0.798672	0.0382388	-20.8864	7.11e-97	2.12e-94	PRMT1		ENSG00000169047	374.559	0.944725	0.112022	8.43342	3.36e-17	4.21e-16	IRS1
ENSG00000073060	2629.59	-0.798421	0.0871559	-9.16084	5.15e-20	7.74e-19	SCARB1		ENSG00000121068	128.466	0.944744	0.232324	4.06649	4.77e-05	0.000187957	TBX2
ENSG00000115616	869.653	-0.797619	0.065639	-12.1516	5.63e-34	1.83e-32	SLC9A2		ENSG00000130038	94.273	0.944795	0.290677	3.25033	0.00115273	0.0035658	CRACR2A
ENSG00000147955	4971.22	-0.797512	0.0572815	-13.9227	4.61e-44	2.42e-42	SIGMAR1		ENSG00000013441	1348.05	0.944822	0.0768786	12.2898	1.03e-34	3.48e-33	CLK1
ENSG00000159873	1444.3	-0.796947	0.0570779	-13.9624	2.64e-44	1.4e-42	CCDC117		ENSG00000181800	61.4601	0.944872	0.21376	4.42024	9.86e-06	4.28e-05	CELF2-AS1
ENSG00000070814	3894.83	-0.796422	0.0421698	-18.8861	1.48e-79	2.75e-77	TCOF1		ENSG00000222019	29.6072	0.945229	0.360732	2.62031	0.00878509	0.0222421	URAHP
ENSG00000160446	1317.07	-0.79605	0.0750209	-10.611	2.65e-26	5.85e-25	ZDHHC12		ENSG00000279821	48.2303	0.945461	0.272905	3.46444	0.00053134	0.00175912	AC145098.2
ENSG00000111845	1417.49	-0.796003	0.0642205	-12.3948	2.79e-35	9.64e-34	PAK1IP1		ENSG00000279722	20.8811	0.946037	0.368013	2.57066	0.0101504	0.0252642	AC007342.7
ENSG00000129173	296.633	-0.795758	0.12158	-6.54513	5.94e-11	4.55e-10	E2F8		ENSG00000165819	701.411	0.946264	0.0708997	13.3465	1.24e-40	5.58e-39	METTL3
ENSG00000224189	105.008	-0.79546	0.204408	-3.89153	9.96e-05	0.000372055	HAGLR		ENSG00000277363	647.805	0.946328	0.0807078	11.7254	9.45e-32	2.78e-30	SRCIN1
ENSG00000100558	110.686	-0.795403	0.164661	-4.83054	1.36e-06	6.62e-06	PLEK2		ENSG00000173705	177.68	0.947186	0.181987	5.20468	1.94e-07	1.04e-06	SUSD5
ENSG00000173638	1694.85	-0.795028	0.0588641	-13.5061	1.44e-41	6.85e-40	SLC19A1		ENSG00000188343	494.595	0.947361	0.141216	6.70858	1.97e-11	1.57e-10	FAM92A
ENSG00000166681	4647.62	-0.794328	0.113372	-7.0064	2.45e-12	2.12e-11	BEX3		ENSG00000102409	948.859	0.947498	0.127362	7.4394	1.01e-13	9.88e-13	BEX4
ENSG00000079101	50.3658	-0.792316	0.283451	-2.79525	0.00518597	0.0139359	CLUL1		ENSG00000185332	19.0553	0.947617	0.389452	2.43321	0.0149657	0.0355981	AC027601.1
ENSG00000273117	370.46	-0.792023	0.0910295	-8.70072	3.3e-18	4.42e-17	AC144652.1		ENSG00000115109	2386.91	0.947906	0.0466049	20.3392	5.78e-92	1.48e-89	EPB41L5
ENSG00000128626	1769.36	-0.790813	0.0484174	-16.3332	5.73e-60	5.5e-58	MRPS12		ENSG00000140682	33.3617	0.949029	0.377854	2.51163	0.0120176	0.029304	TGFB1I1
ENSG00000168268	4105.58	-0.79007	0.0577658	-13.6771	1.39e-42	6.89e-41	NT5DC2		ENSG00000056998	211.056	0.949419	0.154067	6.16237	7.17e-10	4.94e-09	GYG2
ENSG00000157870	2049.76	-0.78939	0.0588925	-13.4039	5.74e-41	2.63e-39	PRXL2B		ENSG00000135374	487.971	0.950047	0.091434	10.3905	2.74e-25	5.66e-24	ELF5
ENSG00000230555	56.2057	-0.789182	0.247993	-3.18228	0.00146122	0.00442446	AL450326.1		ENSG00000271079	53.0536	0.950249	0.249836	3.80349	0.000142673	0.000519326	CTAGE15
ENSG00000179115	3040.92	-0.788592	0.0499525	-15.7869	3.83e-56	3.28e-54	FARSA		ENSG00000197013	150.533	0.950494	0.165534	5.74198	9.36e-09	5.74e-08	ZNF429
ENSG00000081026	782.045	-0.787785	0.0758488	-10.3862	2.86e-25	5.92e-24	MAGI3		ENSG00000185829	131.188	0.950801	0.173968	5.46539	4.62e-08	2.66e-07	ARL17A
ENSG00000149926	33.8806	-0.786867	0.296064	-2.65776	0.00786613	0.0201877	TLCD3B		ENSG00000247137	110.732	0.951315	0.202298	4.70255	2.57e-06	1.2e-05	AP000873.2
ENSG00000106078	1379.27	-0.786487	0.0691393	-11.3754	5.55e-30	1.47e-28	COBL		ENSG00000276966	58.9288	0.951363	0.240017	3.96373	7.38e-05	0.000281808	HIST1H4E
ENSG00000086289	120.512	-0.785051	0.165431	-4.74549	2.08e-06	9.88e-06	EPDR1		ENSG00000276855	21.7544	0.95221	0.400146	2.37966	0.0173287	0.0404213	AC015922.3
ENSG00000255302	8669	-0.785025	0.0437939	-17.9254	7.47e-72	1.05e-69	EID1		ENSG00000259248	40.2429	0.952492	0.307228	3.10027	0.00193341	0.00571989	USP3-AS1
ENSG00000159184	6874.4	-0.784855	0.052283	-15.0117	6.16e-51	4.24e-49	HOXB13		ENSG00000251417	26.5262	0.95286	0.392429	2.42811	0.0151778	0.0360266	AC145285.2
ENSG00000135723	763.229	-0.784759	0.0691976	-11.3408	8.24e-30	2.18e-28	FHOD1		ENSG00000229180	284.905	0.953131	0.127343	7.48476	7.17e-14	7.08e-13	AC006001.3
ENSG00000182858	457.2	-0.784389	0.0964373	-8.13367	4.16e-16	4.83e-15	ALG12		ENSG00000165195	645.692	0.953423	0.0730848	13.0454	6.75e-39	2.76e-37	PIGA
ENSG00000241945	249.807	-0.783987	0.128755	-6.08896	1.14e-09	7.69e-09	PWP2		ENSG00000273568	31.1685	0.954471	0.384585	2.48182	0.0130714	0.0316087	AC131009.3
ENSG00000198681	2258.38	-0.783709	0.0427082	-18.3503	3.28e-75	5.22e-73	MAGEA1		ENSG00000228782	178.451	0.954508	0.139109	6.86159	6.81e-12	5.65e-11	MRPL45P2
ENSG00000141668	832.337	-0.783607	0.0844926	-9.27426	1.79e-20	2.79e-19	CBLN2		ENSG00000278784	46.1531	0.954711	0.273415	3.4918	0.000479783	0.00160276	AL136295.7
ENSG00000185303	90.4918	-0.783099	0.172662	-4.53544	5.75e-06	2.58e-05	SFTPA2		ENSG00000188869	68.1341	0.954983	0.242805	3.93312	8.38e-05	0.000317008	TMC3
ENSG00000166165	30476.4	-0.782929	0.110898	-7.0599	1.67e-12	1.47e-11	CKB		ENSG00000120049	46.6044	0.955199	0.277986	3.43614	0.000590067	0.00193967	KCNIP2
ENSG00000174607	1032.67	-0.781876	0.064864	-12.0541	1.85e-33	5.83e-32	UGT8		ENSG00000280063	110.557	0.955268	0.184472	5.17838	2.24e-07	1.19e-06	AC012676.5
ENSG00000131323	2119.89	-0.781167	0.0484233	-16.1321	1.52e-58	1.41e-56	TRAF3		ENSG00000165996	62.8537	0.955522	0.364247	2.62328	0.00870867	0.022081	HACD1
ENSG00000169814	359.323	-0.781111	0.1038	-7.52516	5.27e-14	5.25e-13	BTD		ENSG00000167524	124.506	0.955702	0.204584	4.67143	2.99e-06	1.39e-05	RSKR
ENSG00000067057	3053.99	-0.78054	0.118738	-6.57364	4.91e-11	3.8e-10	PFKP		ENSG00000055118	62.0829	0.955791	0.31687	3.01635	0.00255839	0.00737272	KCNH2
ENSG00000141499	540.986	-0.779681	0.0873691	-8.92398	4.5e-19	6.38e-18	WRAP53		ENSG00000251364	61.8134	0.955943	0.243663	3.92322	8.74e-05	0.000329421	AC107884.1
ENSG00000120539	558.294	-0.779349	0.080107	-9.72885	2.27e-22	3.95e-21	MASTL		ENSG00000279010	141.887	0.957764	0.193862	4.94044	7.79e-07	3.9e-06	#N/A
ENSG00000185203	26.6609	-0.779239	0.330345	-2.35886	0.0183311	0.0424346	WASIR1		ENSG00000185513	270.786	0.95814	0.140752	6.80728	9.95e-12	8.15e-11	L3MBTL1
ENSG00000132341	11596.2	-0.779168	0.0434926	-17.9149	9.02e-72	1.26e-69	RAN		ENSG00000157827	310.933	0.958347	0.167588	5.71846	1.07e-08	6.56e-08	FMNL2
ENSG00000245248	99.0946	-0.778434	0.165663	-4.6989	2.62e-06	1.22e-05	USP2-AS1		ENSG00000154309	140.22	0.958421	0.172216	5.56522	2.62e-08	1.54e-07	DISP1
ENSG00000128228	1194.54	-0.778212	0.076273	-10.203	1.92e-24	3.81e-23	SDF2L1		ENSG00000274422	23.0401	0.958787	0.418871	2.28898	0.0220805	0.0497757	AC245060.5
ENSG00000138092	493.393	-0.778157	0.0924691	-8.41532	3.92e-17	4.89e-16	CENPO		ENSG00000198563	2246.48	0.959045	0.0633179	15.1465	7.99e-52	5.7e-50	DDX39B
ENSG00000101911	1602.07	-0.778076	0.0461805	-16.8486	1.07e-63	1.19e-61	PRPS2		ENSG00000153721	828.555	0.959527	0.0769243	12.4736	1.04e-35	3.68e-34	CNKSR3
ENSG00000174939	903.55	-0.777957	0.0823008	-9.4526	3.31e-21	5.38e-20	ASPHD1		ENSG00000104059	82.4752	0.960392	0.295239	3.25293	0.00114222	0.00353814	FAM189A1
ENSG00000189319	924.963	-0.777495	0.083184	-9.34668	9.04e-21	1.44e-19	FAM53B		ENSG00000151687	87.4811	0.960462	0.201064	4.77689	1.78e-06	8.52e-06	ANKAR
ENSG00000115525	174.42	-0.777196	0.131333	-5.91776	3.26e-09	2.11e-08	ST3GAL5		ENSG00000227258	21.9	0.961188	0.378951	2.53644	0.0111986	0.0275218	SMIM2-AS1
ENSG00000053371	1179.92	-0.77691	0.0728043	-10.6712	1.39e-26	3.13e-25	AKR7A2		ENSG00000157064	278.844	0.961561	0.102122	9.41582	4.69e-21	7.58e-20	NMNAT2
ENSG00000240370	83.6292	-0.775984	0.204526	-3.79406	0.000148205	0.000537276	RPL13P5		ENSG00000262772	68.7103	0.962209	0.193996	4.95995	7.05e-07	3.54e-06	LINC01977
ENSG00000253438	53.595	-0.775832	0.233871	-3.31735	0.000908765	0.00287637	PCAT1		ENSG00000128268	102.109	0.962275	0.280025	3.43639	0.000589524	0.00193837	MGAT3
ENSG00000272989	73.3161	-0.775581	0.234512	-3.30721	0.000942312	0.00297383	LINC02012		ENSG00000271119	66.6848	0.962454	0.211864	4.54279	5.55e-06	2.49e-05	AC026412.3
ENSG00000163947	140.593	-0.775522	0.14944	-5.18951	2.11e-07	1.12e-06	ARHGEF3		ENSG00000145700	77.1497	0.962565	0.219562	4.38402	1.17e-05	5e-05	ANKRD31
ENSG00000125648	2674.64	-0.775444	0.0815898	-9.50418	2.02e-21	3.32e-20	SLC25A23		ENSG00000250091	39.7929	0.963157	0.281977	3.41573	0.000636123	0.00207998	DNAH10OS
ENSG00000271347	26.1935	-0.775057	0.307953	-2.51681	0.0118424	0.0289201	#N/A		ENSG00000020181	250.501	0.964501	0.14907	6.4701	9.79e-11	7.36e-10	ADGRA2
ENSG00000099901	4584.76	-0.774867	0.0553293	-14.0046	1.46e-44	7.9e-43	RANBP1		ENSG00000240996	25.5801	0.965194	0.373933	2.58119	0.00984603	0.0246132	AL157400.4
ENSG00000104140	830.21	-0.774719	0.0852637	-9.08615	1.03e-19	1.51e-18	RHOV		ENSG00000272872	81.6973	0.965951	0.236739	4.08024	4.5e-05	0.000177797	AP000525.1
ENSG00000128739	399.698	-0.774413	0.0921863	-8.40052	4.45e-17	5.51e-16	SNRPN		ENSG00000088854	270.457	0.96601	0.115155	8.38877	4.91e-17	6.07e-16	C20orf194
ENSG00000233392	539.152	-0.77404	0.0990507	-7.81458	5.51e-15	5.92e-14	AC104809.2		ENSG00000179240	185.419	0.966304	0.152525	6.33539	2.37e-10	1.71e-09	GVQW3
ENSG00000170430	1273.61	-0.773486	0.0651544	-11.8716	1.66e-32	5.05e-31	MGMT		ENSG00000153956	1008.69	0.966709	0.0625064	15.4658	5.91e-54	4.56e-52	CACNA2D1
ENSG00000213062	34.3063	-0.772852	0.332881	-2.32171	0.0202488	0.0462379	Z99572.1		ENSG00000105327	424.654	0.967197	0.128614	7.52014	5.47e-14	5.45e-13	BBC3
ENSG00000187123	60.8806	-0.772086	0.210359	-3.67032	0.000242249	0.000849445	LYPD6		ENSG00000006071	47.1325	0.967896	0.376154	2.57314	0.010078	0.0251059	ABCC8
ENSG00000160285	3372.68	-0.772032	0.0490848	-15.7285	9.64e-56	8.03e-54	LSS		ENSG00000075826	196.068	0.96791	0.211365	4.57932	4.66e-06	2.12e-05	SEC31B
ENSG00000149503	1798.77	-0.771647	0.0492597	-15.6649	2.63e-55	2.17e-53	INCENP		ENSG00000126562	43.0087	0.968061	0.400389	2.4178	0.0156146	0.036928	WNK4
ENSG00000230202	487.354	-0.770942	0.138585	-5.56295	2.65e-08	1.56e-07	AL450405.1		ENSG00000183230	71.1689	0.968438	0.210436	4.60206	4.18e-06	1.91e-05	CTNNA3
ENSG00000243955	124.187	-0.770789	0.185678	-4.15122	3.31e-05	0.000133297	GSTA1		ENSG00000221909	183.929	0.969112	0.147745	6.55938	5.4e-11	4.16e-10	FAM200A
ENSG00000156802	2757.79	-0.770419	0.0552679	-13.9397	3.63e-44	1.91e-42	ATAD2		ENSG00000274602	250.145	0.969738	0.160516	6.04139	1.53e-09	1.02e-08	PI4KAP1
ENSG00000204052	82.7349	-0.770416	0.180566	-4.26668	1.98e-05	8.24e-05	LRRC73		ENSG00000270012	84.9849	0.970017	0.190508	5.09174	3.55e-07	1.85e-06	AC232271.1
ENSG00000100300	2957.58	-0.77016	0.0517329	-14.8872	3.99e-50	2.65e-48	TSPO		ENSG00000146556	249.231	0.970621	0.130985	7.41015	1.26e-13	1.23e-12	WASH2P
ENSG00000089327	272.327	-0.769794	0.141738	-5.43111	5.6e-08	3.19e-07	FXYD5		ENSG00000243710	18.3657	0.970858	0.420786	2.30725	0.0210411	0.0477775	CFAP57
ENSG00000129195	754.399	-0.76952	0.0804567	-9.5644	1.13e-21	1.88e-20	PIMREG		ENSG00000164398	41.1663	0.97105	0.3596	2.70036	0.00692647	0.0180261	ACSL6
ENSG00000167513	1819.16	-0.768985	0.0832446	-9.23766	2.52e-20	3.87e-19	CDT1		ENSG00000114626	269.856	0.97119	0.1501	6.47028	9.78e-11	7.35e-10	ABTB1
ENSG00000109062	3820.25	-0.768849	0.0700062	-10.9826	4.63e-28	1.13e-26	SLC9A3R1		ENSG00000196876	76.3259	0.971265	0.29194	3.32693	0.000878092	0.00278712	SCN8A
ENSG00000103145	651.996	-0.768216	0.11673	-6.58111	4.67e-11	3.62e-10	HCFC1R1		ENSG00000272599	21.6647	0.971298	0.352999	2.75156	0.00593129	0.0157059	AC016394.2
ENSG00000114378	269.63	-0.768106	0.109836	-6.99324	2.69e-12	2.32e-11	HYAL1		ENSG00000235100	16.329	0.972295	0.416703	2.33331	0.0196321	0.04502	AL157400.3
ENSG00000134490	630.567	-0.767626	0.0763281	-10.0569	8.56e-24	1.64e-22	TMEM241		ENSG00000226067	69.8985	0.972343	0.241853	4.02038	5.81e-05	0.000225835	LINC00623
ENSG00000174684	1129.77	-0.767242	0.0653285	-11.7444	7.55e-32	2.24e-30	B4GAT1		ENSG00000250420	421.509	0.972587	0.0979402	9.93042	3.07e-23	5.67e-22	AACSP1
ENSG00000267041	117.91	-0.766766	0.177676	-4.31552	1.59e-05	6.7e-05	ZNF850		ENSG00000105519	226.443	0.972718	0.127047	7.65638	1.91e-14	1.98e-13	CAPS
ENSG00000138771	3440.89	-0.766688	0.0774787	-9.89547	4.36e-23	7.95e-22	SHROOM3		ENSG00000108511	419.407	0.973476	0.113335	8.58935	8.75e-18	1.14e-16	HOXB6
ENSG00000156471	1770.32	-0.766552	0.056955	-13.4589	2.73e-41	1.28e-39	PTDSS1		ENSG00000166046	222.621	0.974279	0.165997	5.86927	4.38e-09	2.79e-08	TCP11L2
ENSG00000007376	1915.61	-0.76618	0.0481471	-15.9133	5.12e-57	4.49e-55	RPUSD1		ENSG00000169621	51.2336	0.974721	0.295364	3.30006	0.00096663	0.00304133	APLF
ENSG00000170275	2979.38	-0.766104	0.0606767	-12.626	1.52e-36	5.62e-35	CRTAP		ENSG00000257261	123.479	0.974888	0.193486	5.03856	4.69e-07	2.41e-06	AC008014.1
ENSG00000198515	60.3149	-0.765984	0.225497	-3.39687	0.000681623	0.00221229	CNGA1		ENSG00000133134	2978.27	0.975435	0.0803552	12.139	6.56e-34	2.12e-32	BEX2
ENSG00000142089	1569.1	-0.76573	0.0803206	-9.53343	1.52e-21	2.53e-20	IFITM3		ENSG00000251432	36.4914	0.975607	0.280428	3.47899	0.000503301	0.00167485	LINC02615
ENSG00000112651	1172.32	-0.765728	0.0598643	-12.7911	1.84e-37	7.03e-36	MRPL2		ENSG00000157510	120.482	0.975722	0.313051	3.11681	0.00182818	0.0054309	AFAP1L1
ENSG00000140525	2160.21	-0.765669	0.0607978	-12.5937	2.29e-36	8.36e-35	FANCI		ENSG00000268949	27.3576	0.976223	0.377886	2.58338	0.00978385	0.0244837	MRPS17P1
ENSG00000037965	159.372	-0.765647	0.139231	-5.49913	3.82e-08	2.21e-07	HOXC8		ENSG00000132199	1541.65	0.976558	0.0726349	13.4447	3.31e-41	1.54e-39	ENOSF1
ENSG00000120694	5972.82	-0.765596	0.0431851	-17.7283	2.54e-70	3.44e-68	HSPH1		ENSG00000171033	209.599	0.976633	0.127719	7.64675	2.06e-14	2.12e-13	PKIA
ENSG00000006118	4234.41	-0.76546	0.0610179	-12.5449	4.24e-36	1.52e-34	TMEM132A		ENSG00000259405	60.0599	0.976892	0.229484	4.25691	2.07e-05	8.58e-05	ISCA1P4
ENSG00000090273	3281.18	-0.76534	0.0441003	-17.3545	1.82e-67	2.33e-65	NUDC		ENSG00000074660	182.18	0.976951	0.128904	7.57891	3.48e-14	3.53e-13	SCARF1
ENSG00000163468	10373.7	-0.765154	0.0384904	-19.8791	6.17e-88	1.4e-85	CCT3		ENSG00000150556	98.2415	0.977013	0.17471	5.59219	2.24e-08	1.33e-07	LYPD6B
ENSG00000144736	465.224	-0.765041	0.0942693	-8.11548	4.84e-16	5.58e-15	SHQ1		ENSG00000234338	42.5018	0.977982	0.328785	2.97454	0.00293433	0.00834198	AC073349.2
ENSG00000137106	4582.17	-0.764789	0.045795	-16.7003	1.3e-62	1.38e-60	GRHPR		ENSG00000258315	21.7834	0.97812	0.39775	2.45913	0.0139273	0.0334135	C17orf49
ENSG00000106009	2215.15	-0.764372	0.05722	-13.3585	1.06e-40	4.78e-39	BRAT1		ENSG00000278811	34.2897	0.978276	0.309233	3.16356	0.00155854	0.00469609	LINC00624
ENSG00000087338	806.66	-0.763996	0.0632442	-12.0801	1.35e-33	4.28e-32	GMCL1		ENSG00000135407	120.689	0.979169	0.170885	5.72999	1e-08	6.14e-08	AVIL
ENSG00000090932	325.384	-0.763968	0.104642	-7.30075	2.86e-13	2.7e-12	DLL3		ENSG00000278384	191.501	0.979516	0.155669	6.29229	3.13e-10	2.24e-09	AL354822.1
ENSG00000276529	103.611	-0.763417	0.189719	-4.02393	5.72e-05	0.000222689	AP001505.1		ENSG00000253200	35.0553	0.980454	0.279321	3.51013	0.000447891	0.00150359	AC037459.2
ENSG00000044524	1015.62	-0.763196	0.062441	-12.2227	2.35e-34	7.79e-33	EPHA3		ENSG00000270804	44.1928	0.980915	0.288638	3.39843	0.00067775	0.00220247	AC010326.4
ENSG00000160877	4007	-0.762228	0.0477189	-15.9733	1.96e-57	1.75e-55	NACC1		ENSG00000125968	292.921	0.981407	0.277746	3.53347	0.000410136	0.0013851	ID1
ENSG00000233426	105.986	-0.762188	0.17692	-4.30809	1.65e-05	6.91e-05	EIF3FP3		ENSG00000180525	27.208	0.981919	0.331202	2.96471	0.00302965	0.00858379	PRR26
ENSG00000129968	2084.27	-0.761909	0.055241	-13.7925	2.83e-43	1.44e-41	ABHD17A		ENSG00000259605	22.6479	0.981963	0.381266	2.57554	0.0100085	0.0249567	AC074212.1
ENSG00000003249	1714.5	-0.761672	0.0967424	-7.8732	3.46e-15	3.77e-14	DBNDD1		ENSG00000228409	240.27	0.982235	0.120334	8.16259	3.28e-16	3.84e-15	CCT6P1
ENSG00000198168	1499.01	-0.761562	0.0747472	-10.1885	2.23e-24	4.4e-23	SVIP		ENSG00000243708	33.1123	0.982508	0.309655	3.17291	0.00150918	0.0045569	PLA2G4B
ENSG00000174371	899.788	-0.761133	0.083746	-9.0886	1e-19	1.48e-18	EXO1		ENSG00000227232	246.7	0.982593	0.131026	7.49921	6.42e-14	6.36e-13	WASH7P
ENSG00000139547	37.9462	-0.759837	0.267854	-2.83675	0.00455749	0.0124079	RDH16		ENSG00000205560	42.1647	0.983086	0.276617	3.55396	0.000379479	0.00128862	CPT1B
ENSG00000116237	3207.68	-0.759727	0.0451869	-16.813	1.96e-63	2.14e-61	ICMT		ENSG00000213413	19.8805	0.98367	0.361172	2.72355	0.00645839	0.0169423	PVRIG
ENSG00000185201	664.632	-0.759686	0.0810499	-9.37306	7.05e-21	1.13e-19	IFITM2		ENSG00000163794	76.8476	0.983696	0.225073	4.37055	1.24e-05	5.29e-05	UCN
ENSG00000128245	1275.01	-0.759593	0.0567604	-13.3825	7.66e-41	3.49e-39	YWHAH		ENSG00000170689	1973.41	0.985272	0.070265	14.0222	1.14e-44	6.19e-43	HOXB9
ENSG00000128989	5215.98	-0.759311	0.0361988	-20.9762	1.08e-97	3.3e-95	ARPP19		ENSG00000198711	28.084	0.985314	0.321024	3.06928	0.00214574	0.00629344	SSBP3-AS1
ENSG00000204103	1796.27	-0.759083	0.0619627	-12.2506	1.67e-34	5.57e-33	MAFB		ENSG00000131378	69.1999	0.985651	0.309372	3.18597	0.00144268	0.00437396	RFTN1
ENSG00000126249	241.154	-0.758389	0.125349	-6.0502	1.45e-09	9.69e-09	PDCD2L		ENSG00000179477	47.7501	0.985812	0.260481	3.78458	0.00015397	0.000556305	ALOX12B
ENSG00000131188	1458.72	-0.757799	0.0726364	-10.4328	1.76e-25	3.68e-24	PRR7		ENSG00000132386	314.517	0.985831	0.153782	6.41058	1.45e-10	1.07e-09	SERPINF1
ENSG00000262714	106.828	-0.757654	0.177484	-4.26884	1.96e-05	8.16e-05	AC007342.5		ENSG00000272787	19.6047	0.986255	0.418835	2.35476	0.0185347	0.042837	AC253536.6
ENSG00000147224	3585.88	-0.757573	0.0464787	-16.2994	9.97e-60	9.5e-58	PRPS1		ENSG00000185345	63.0694	0.986475	0.27262	3.6185	0.000296312	0.00102391	PRKN
ENSG00000170043	1524.06	-0.757256	0.0802452	-9.43677	3.84e-21	6.23e-20	TRAPPC1		ENSG00000280415	19.6212	0.986563	0.35451	2.78289	0.00538769	0.0144211	AC005252.3
ENSG00000140280	506.838	-0.756937	0.0871358	-8.68686	3.73e-18	4.97e-17	LYSMD2		ENSG00000230002	24.2548	0.987094	0.414948	2.37884	0.0173674	0.0404981	ALMS1-IT1
ENSG00000111640	37560.9	-0.756638	0.0749967	-10.089	6.18e-24	1.19e-22	GAPDH		ENSG00000259659	21.0344	0.98727	0.380351	2.59568	0.00944035	0.0237134	AC009996.1
ENSG00000103089	122.038	-0.756402	0.151814	-4.98242	6.28e-07	3.17e-06	FA2H		ENSG00000256591	17.9741	0.988694	0.397654	2.48631	0.0129074	0.0312558	AP003108.2
ENSG00000111669	20286.9	-0.756246	0.0508312	-14.8776	4.61e-50	3.05e-48	TPI1		ENSG00000255353	49.4529	0.988861	0.265055	3.73077	0.000190896	0.000680238	AP003057.1
ENSG00000108924	338.644	-0.755986	0.105437	-7.17004	7.5e-13	6.81e-12	HLF		ENSG00000185250	168.174	0.989124	0.146085	6.77087	1.28e-11	1.04e-10	PPIL6
ENSG00000137642	472.058	-0.755982	0.0857543	-8.81567	1.19e-18	1.65e-17	SORL1		ENSG00000178695	226.579	0.989332	0.279143	3.54418	0.000393842	0.00133424	KCTD12
ENSG00000130816	4558.93	-0.755979	0.0539709	-14.0072	1.41e-44	7.64e-43	DNMT1		ENSG00000223564	288.846	0.989415	0.128419	7.70456	1.31e-14	1.37e-13	CYP4F32P
ENSG00000140391	4386.26	-0.755966	0.0513369	-14.7256	4.42e-49	2.82e-47	TSPAN3		ENSG00000151136	88.6892	0.989905	0.380781	2.59967	0.00933141	0.0234648	BTBD11
ENSG00000112096	2271.51	-0.755413	0.0444479	-16.9955	8.87e-65	1.04e-62	SOD2		ENSG00000241170	19.5609	0.9902	0.429855	2.30357	0.0212468	0.0481729	AP001992.1
ENSG00000188229	7925.97	-0.755091	0.0528337	-14.2918	2.46e-46	1.41e-44	TUBB4B		ENSG00000228327	272.993	0.991359	0.128492	7.71532	1.21e-14	1.26e-13	AL669831.1
ENSG00000108523	2863.47	-0.755084	0.0599923	-12.5863	2.51e-36	9.12e-35	RNF167		ENSG00000132424	2557.21	0.991371	0.050244	19.7311	1.17e-86	2.48e-84	PNISR
ENSG00000255508	120.578	-0.754768	0.19641	-3.84283	0.000121625	0.000447171	AP002990.1		ENSG00000229491	21.9148	0.991463	0.388232	2.55379	0.0106558	0.0263527	AC136489.1
ENSG00000278259	2665.62	-0.754738	0.0667752	-11.3027	1.27e-29	3.34e-28	MYO19		ENSG00000230724	46.3988	0.991529	0.266741	3.7172	0.000201439	0.00071525	LINC01001
ENSG00000100075	4227.99	-0.754552	0.0643468	-11.7263	9.34e-32	2.75e-30	SLC25A1		ENSG00000149557	107.973	0.99167	0.312049	3.17793	0.00148333	0.00448491	FEZ1
ENSG00000104904	16792.4	-0.754027	0.0478815	-15.7478	7.11e-56	5.96e-54	OAZ1		ENSG00000240429	70.0965	0.992341	0.200734	4.94355	7.67e-07	3.84e-06	LRRFIP1P1
ENSG00000126953	605.565	-0.753867	0.0711628	-10.5936	3.19e-26	7e-25	TIMM8A		ENSG00000224790	38.0427	0.99235	0.304543	3.25849	0.00112008	0.00347851	AP000704.1
ENSG00000178921	2109.26	-0.753772	0.0533618	-14.1257	2.64e-45	1.47e-43	PFAS		ENSG00000161381	49.3917	0.992457	0.25284	3.92523	8.66e-05	0.000326961	PLXDC1
ENSG00000095627	51.3964	-0.752823	0.247552	-3.04107	0.00235738	0.00684369	TDRD1		ENSG00000240207	27.1616	0.992524	0.401498	2.47205	0.0134339	0.0323857	AC080013.1
ENSG00000117632	2429.82	-0.752309	0.0625834	-12.0209	2.76e-33	8.66e-32	STMN1		ENSG00000105550	314.937	0.992531	0.116747	8.50152	1.87e-17	2.39e-16	FGF21
ENSG00000107882	897.15	-0.75172	0.0803929	-9.35058	8.72e-21	1.39e-19	SUFU		ENSG00000143850	2454.11	0.993895	0.0505422	19.6647	4.33e-86	9.05e-84	PLEKHA6
ENSG00000226287	235.133	-0.751675	0.137662	-5.46031	4.75e-08	2.73e-07	TMEM191A		ENSG00000181433	487.642	0.99463	0.0919764	10.814	2.96e-27	6.86e-26	SAGE1
ENSG00000114346	2311.59	-0.750825	0.0621457	-12.0817	1.32e-33	4.21e-32	ECT2		ENSG00000144134	390.069	0.994683	0.10583	9.39889	5.51e-21	8.87e-20	RABL2A
ENSG00000026950	166.801	-0.75064	0.143945	-5.21477	1.84e-07	9.89e-07	BTN3A1		ENSG00000270882	150.405	0.995933	0.148854	6.69067	2.22e-11	1.77e-10	HIST2H4A
ENSG00000127423	242.287	-0.750366	0.129235	-5.80622	6.39e-09	4e-08	AUNIP		ENSG00000176700	105.553	0.99603	0.169954	5.86059	4.61e-09	2.93e-08	SCAND2P
ENSG00000213707	101.594	-0.750333	0.179294	-4.18493	2.85e-05	0.000115914	HMGB1P10		ENSG00000151164	77.7322	0.996218	0.213558	4.66486	3.09e-06	1.43e-05	RAD9B
ENSG00000117411	2616.69	-0.74981	0.0500431	-14.9833	9.44e-51	6.46e-49	B4GALT2		ENSG00000102854	34.8942	0.99685	0.276227	3.60881	0.000307608	0.00106083	MSLN
ENSG00000158864	5831.67	-0.749701	0.03988	-18.7989	7.7e-79	1.37e-76	NDUFS2		ENSG00000076258	51.9345	0.996954	0.306217	3.25571	0.00113111	0.00350855	FMO4
ENSG00000015475	894.372	-0.74926	0.0664996	-11.2671	1.91e-29	4.95e-28	BID		ENSG00000230069	49.5095	0.996958	0.294935	3.38027	0.000724152	0.00233802	LRRC37A15P
ENSG00000135617	547.193	-0.749233	0.0758842	-9.87337	5.43e-23	9.85e-22	PRADC1		ENSG00000263826	70.0209	0.997017	0.213232	4.67574	2.93e-06	1.36e-05	AC112907.3
ENSG00000133119	1936.77	-0.748996	0.0479693	-15.6141	5.84e-55	4.71e-53	RFC3		ENSG00000272341	55.3595	0.99793	0.28213	3.53713	0.000404501	0.00136785	AL137003.2
ENSG00000167315	326.114	-0.748802	0.118347	-6.32717	2.5e-10	1.8e-09	ACAA2		ENSG00000169246	97.7067	0.998257	0.215757	4.62676	3.71e-06	1.71e-05	NPIPB3
ENSG00000069482	1052.45	-0.748248	0.0689791	-10.8475	2.05e-27	4.8e-26	GAL		ENSG00000184949	165.008	0.998749	0.166916	5.98355	2.18e-09	1.43e-08	FAM227A
ENSG00000090316	1758.86	-0.748214	0.0540999	-13.8302	1.67e-43	8.61e-42	MAEA		ENSG00000267855	24.5752	0.998904	0.422065	2.36671	0.0179472	0.041695	NDUFA7
ENSG00000099797	2103.14	-0.747986	0.0725326	-10.3124	6.19e-25	1.26e-23	TECR		ENSG00000170919	170.281	0.999328	0.154374	6.47343	9.58e-11	7.21e-10	TPT1-AS1
ENSG00000180992	1193.12	-0.747871	0.0932964	-8.01607	1.09e-15	1.23e-14	MRPL14		ENSG00000165556	179.736	0.999591	0.245623	4.06962	4.71e-05	0.000185588	CDX2
ENSG00000161048	994.593	-0.747524	0.0555694	-13.4521	2.99e-41	1.41e-39	NAPEPLD		ENSG00000112715	9378.94	0.99989	0.0749183	13.3464	1.24e-40	5.58e-39	VEGFA
ENSG00000267309	66.8659	-0.747474	0.201864	-3.70286	0.000213179	0.000753937	AC092295.2		ENSG00000155980	153.216	0.999942	0.181378	5.51302	3.53e-08	2.05e-07	KIF5A
ENSG00000118640	1054.11	-0.747269	0.0886525	-8.4292	3.48e-17	4.37e-16	VAMP8		ENSG00000261556	189.999	1.00013	0.13919	7.18534	6.7e-13	6.13e-12	SMG1P7
ENSG00000160818	1264.79	-0.746945	0.0725043	-10.3021	6.9e-25	1.4e-23	GPATCH4		ENSG00000109452	559.769	1.00069	0.155632	6.42982	1.28e-10	9.48e-10	INPP4B
ENSG00000182791	87.4951	-0.74689	0.18057	-4.13629	3.53e-05	0.000141519	CCDC87		ENSG00000111837	77.7133	1.00087	0.260895	3.8363	0.0001249	0.000458564	MAK
ENSG00000106049	2014.47	-0.746695	0.0447132	-16.6996	1.32e-62	1.38e-60	HIBADH		ENSG00000163617	140.375	1.00109	0.152383	6.56956	5.05e-11	3.9e-10	CCDC191
ENSG00000213300	42.8993	-0.746116	0.298782	-2.4972	0.012518	0.0304152	HNRNPA3P6		ENSG00000170873	87.0289	1.00114	0.281911	3.55128	0.000383361	0.00130078	MTSS1
ENSG00000167799	1356.49	-0.746018	0.06323	-11.7985	3.97e-32	1.18e-30	NUDT8		ENSG00000260273	18.481	1.00151	0.377953	2.64982	0.00805347	0.0206256	AL359711.2
ENSG00000158169	868.353	-0.745839	0.0641488	-11.6267	3.01e-31	8.6e-30	FANCC		ENSG00000253305	30.9965	1.00212	0.306664	3.26782	0.00108379	0.00337469	PCDHGB6
ENSG00000179967	127.541	-0.74536	0.198689	-3.75139	0.000175856	0.000630285	PPP1R14BP3		ENSG00000254876	30.8274	1.00285	0.31071	3.2276	0.00124835	0.0038305	SUGT1P4-STRA6LP
ENSG00000105953	8806.08	-0.744742	0.0497021	-14.9841	9.32e-51	6.39e-49	OGDH		ENSG00000234147	64.187	1.00306	0.338121	2.96656	0.00301152	0.00853616	AL035446.1
ENSG00000111602	3377.81	-0.744281	0.04718	-15.7754	4.6e-56	3.89e-54	TIMELESS		ENSG00000227953	30.7458	1.0031	0.364795	2.74978	0.00596358	0.0157849	LINC01341
ENSG00000136492	447.223	-0.743825	0.0903614	-8.23167	1.85e-16	2.2e-15	BRIP1		ENSG00000276710	570.483	1.00367	0.0948103	10.5861	3.46e-26	7.57e-25	CSPG4P10
ENSG00000140534	618.433	-0.743712	0.106158	-7.00572	2.46e-12	2.12e-11	TICRR		ENSG00000178665	47.0362	1.00372	0.28912	3.47163	0.000517316	0.0017181	ZNF713
ENSG00000115266	700.373	-0.7433	0.0884239	-8.40609	4.24e-17	5.27e-16	APC2		ENSG00000207425	62.2	1.00422	0.240518	4.17523	2.98e-05	0.000120721	Y_RNA
ENSG00000177542	2370.42	-0.742642	0.0655962	-11.3214	1.03e-29	2.71e-28	SLC25A22		ENSG00000268439	24.6124	1.00456	0.339274	2.96092	0.00306724	0.00868079	#N/A
ENSG00000103707	677.792	-0.742239	0.0636115	-11.6683	1.85e-31	5.35e-30	MTFMT		ENSG00000159885	60.3366	1.0049	0.278018	3.61453	0.000300898	0.00103852	ZNF222
ENSG00000145386	1257.41	-0.74214	0.0826375	-8.98067	2.69e-19	3.86e-18	CCNA2		ENSG00000142396	200.14	1.0056	0.138934	7.23798	4.55e-13	4.22e-12	ERVK3-1
ENSG00000112039	461.845	-0.742053	0.0862984	-8.59869	8.06e-18	1.06e-16	FANCE		ENSG00000279414	49.7911	1.00627	0.246335	4.08497	4.41e-05	0.000174402	CR392039.3
ENSG00000149573	531.855	-0.741084	0.0781388	-9.48419	2.44e-21	4.01e-20	MPZL2		ENSG00000245888	23.1272	1.00639	0.404126	2.49028	0.0127641	0.0309465	NSMCE1-DT
ENSG00000164032	9567.36	-0.740754	0.058512	-12.6599	9.87e-37	3.68e-35	H2AFZ		ENSG00000114796	1067.58	1.00681	0.0647929	15.5389	1.89e-54	1.49e-52	KLHL24
ENSG00000179820	977.481	-0.740319	0.0894429	-8.277	1.26e-16	1.52e-15	MYADM		ENSG00000147082	43.1896	1.00686	0.334096	3.01367	0.00258105	0.00743046	CCNB3
ENSG00000161847	904.18	-0.740242	0.102886	-7.19475	6.26e-13	5.74e-12	RAVER1		ENSG00000106031	124.75	1.00735	0.336116	2.99702	0.00272636	0.00780212	HOXA13
ENSG00000108561	10017.8	-0.739794	0.0543244	-13.6181	3.13e-42	1.53e-40	C1QBP		ENSG00000130518	108.071	1.00757	0.19792	5.0908	3.57e-07	1.86e-06	IQCN
ENSG00000185813	2133.36	-0.739649	0.0546846	-13.5257	1.1e-41	5.28e-40	PCYT2		ENSG00000078814	71.7189	1.00862	0.226447	4.45411	8.42e-06	3.7e-05	MYH7B
ENSG00000125454	424.942	-0.739551	0.0987943	-7.48576	7.11e-14	7.03e-13	SLC25A19		ENSG00000196081	95.0014	1.00885	0.24441	4.12769	3.66e-05	0.000146621	ZNF724
ENSG00000111726	2106.81	-0.739091	0.0495829	-14.9062	3e-50	2.02e-48	CMAS		ENSG00000227256	16.7863	1.00972	0.436151	2.31508	0.0206087	0.0469388	MIS18A-AS1
ENSG00000170892	1348.33	-0.737833	0.0561568	-13.1388	1.97e-39	8.37e-38	TSEN34		ENSG00000232995	73.5998	1.00992	0.220654	4.57695	4.72e-06	2.14e-05	AL592435.1
ENSG00000173852	531.764	-0.737203	0.0819184	-8.99924	2.27e-19	3.27e-18	DPY19L1		ENSG00000280128	252.8	1.00993	0.149651	6.74861	1.49e-11	1.21e-10	AL662795.2
ENSG00000173801	7286.24	-0.737043	0.0807045	-9.13262	6.69e-20	9.96e-19	JUP		ENSG00000275764	98.2497	1.01039	0.210569	4.79836	1.6e-06	7.71e-06	AC092747.4
ENSG00000072954	292.079	-0.736315	0.115392	-6.38102	1.76e-10	1.29e-09	TMEM38A		ENSG00000269858	314.4	1.01091	0.10088	10.021	1.23e-23	2.33e-22	EGLN2
ENSG00000014138	1079.81	-0.735981	0.070288	-10.4709	1.17e-25	2.48e-24	POLA2		ENSG00000273148	40.9035	1.01094	0.342058	2.95546	0.00312204	0.0088224	LINC00653
ENSG00000172974	44.404	-0.735765	0.277254	-2.65376	0.00795995	0.0204103	AC007318.1		ENSG00000226200	104.282	1.01259	0.169031	5.99059	2.09e-09	1.38e-08	SGMS1-AS1
ENSG00000167183	1554.8	-0.735659	0.0607967	-12.1003	1.05e-33	3.37e-32	PRR15L		ENSG00000273142	419.254	1.01583	0.142704	7.11839	1.09e-12	9.78e-12	LINC02604
ENSG00000131015	285.869	-0.735598	0.111877	-6.57507	4.86e-11	3.77e-10	ULBP2		ENSG00000100288	29.9485	1.01668	0.334184	3.04226	0.00234806	0.00682198	CHKB
ENSG00000126602	5039.21	-0.734763	0.0482511	-15.2279	2.31e-52	1.7e-50	TRAP1		ENSG00000254860	158.573	1.01699	0.144516	7.03721	1.96e-12	1.71e-11	TMEM9B-AS1
ENSG00000247735	99.4283	-0.734539	0.168508	-4.35907	1.31e-05	5.56e-05	AC120114.1		ENSG00000172771	366.785	1.0182	0.142132	7.16372	7.85e-13	7.11e-12	EFCAB12
ENSG00000116455	905.382	-0.7343	0.0648699	-11.3196	1.05e-29	2.76e-28	WDR77		ENSG00000232803	20.7164	1.01841	0.34964	2.91274	0.00358278	0.0100001	SLCO4A1-AS1
ENSG00000120885	237.887	-0.733542	0.12389	-5.92093	3.2e-09	2.07e-08	CLU		ENSG00000269837	109.511	1.01931	0.20074	5.07777	3.82e-07	1.98e-06	IPO5P1
ENSG00000165264	1308.56	-0.733268	0.0805147	-9.10725	8.45e-20	1.25e-18	NDUFB6		ENSG00000183696	359.788	1.01944	0.116137	8.77793	1.67e-18	2.28e-17	UPP1
ENSG00000136270	2989.74	-0.733259	0.0435387	-16.8416	1.21e-63	1.33e-61	TBRG4		ENSG00000282995	28.3879	1.01968	0.319083	3.19564	0.0013952	0.00424489	FRG1EP
ENSG00000105220	11757.8	-0.733089	0.105647	-6.93905	3.95e-12	3.34e-11	GPI		ENSG00000255306	34.4193	1.01971	0.326602	3.12219	0.0017951	0.00533934	AC004923.4
ENSG00000117407	94.2416	-0.733082	0.197663	-3.70875	0.000208286	0.000737844	ARTN		ENSG00000262877	89.3799	1.01992	0.190535	5.35291	8.66e-08	4.82e-07	AC110285.2
ENSG00000179862	123.736	-0.732477	0.175124	-4.18263	2.88e-05	0.000117002	CITED4		ENSG00000078487	134.545	1.02	0.172924	5.89855	3.67e-09	2.36e-08	ZCWPW1
ENSG00000165304	1220.94	-0.731766	0.075464	-9.69688	3.11e-22	5.36e-21	MELK		ENSG00000153234	26.8851	1.02026	0.385565	2.64615	0.00814147	0.020816	NR4A2
ENSG00000075336	1133.82	-0.731151	0.0604025	-12.1046	9.98e-34	3.21e-32	TIMM21		ENSG00000113073	30.0159	1.02041	0.380025	2.68511	0.00725061	0.0187678	SLC4A9
ENSG00000186907	298.691	-0.731038	0.114529	-6.383	1.74e-10	1.27e-09	RTN4RL2		ENSG00000279541	45.6179	1.02211	0.297999	3.42989	0.000603824	0.00198087	AC005261.5
ENSG00000080839	700.806	-0.730996	0.0849499	-8.60502	7.63e-18	1e-16	RBL1		ENSG00000237686	119.342	1.02227	0.443895	2.30295	0.0212819	0.0482398	AL109615.3
ENSG00000176749	351.857	-0.730092	0.103632	-7.04508	1.85e-12	1.62e-11	CDK5R1		ENSG00000163009	29.4085	1.0228	0.431805	2.36866	0.0178528	0.0415093	#N/A
ENSG00000186806	289.133	-0.728691	0.161503	-4.51192	6.42e-06	2.86e-05	VSIG10L		ENSG00000189136	35.6253	1.02283	0.365898	2.79538	0.00518382	0.0139316	UBE2Q2P1
ENSG00000102178	2281.85	-0.726655	0.0497261	-14.6131	2.32e-48	1.44e-46	UBL4A		ENSG00000210164	59.189	1.02369	0.262386	3.90146	9.56e-05	0.000358204	MT-TG
ENSG00000146918	3080.72	-0.726163	0.0541668	-13.406	5.57e-41	2.57e-39	NCAPG2		ENSG00000101222	13.4687	1.02427	0.429865	2.38278	0.0171823	0.0401593	SPEF1
ENSG00000176974	2619.98	-0.724434	0.0425942	-17.0078	7.19e-65	8.43e-63	SHMT1		ENSG00000095370	38.5915	1.02431	0.299245	3.42297	0.000619398	0.00202709	SH2D3C
ENSG00000131828	4042.54	-0.724094	0.0381663	-18.9721	2.9e-80	5.57e-78	PDHA1		ENSG00000112041	14.6316	1.02445	0.418946	2.44531	0.0144728	0.0345684	TULP1
ENSG00000111424	1110.87	-0.723761	0.0659364	-10.9766	4.95e-28	1.2e-26	VDR		ENSG00000039139	316.376	1.02463	0.105286	9.73181	2.21e-22	3.85e-21	DNAH5
ENSG00000138801	1662.31	-0.723652	0.0459431	-15.7511	6.75e-56	5.68e-54	PAPSS1		ENSG00000186814	769.429	1.02538	0.0732929	13.9902	1.79e-44	9.62e-43	ZSCAN30
ENSG00000204371	2153.34	-0.723579	0.0502919	-14.3876	6.19e-47	3.66e-45	EHMT2		ENSG00000067445	262.398	1.02597	0.21989	4.66582	3.07e-06	1.42e-05	TRO
ENSG00000163545	271.858	-0.722893	0.109269	-6.61574	3.7e-11	2.89e-10	NUAK2		ENSG00000163357	154.825	1.02614	0.156091	6.57398	4.9e-11	3.79e-10	DCST1
ENSG00000243479	930.996	-0.72283	0.0684037	-10.5671	4.23e-26	9.21e-25	MNX1-AS1		ENSG00000139625	401.775	1.02712	0.0998833	10.2832	8.39e-25	1.69e-23	MAP3K12
ENSG00000160172	293.605	-0.722658	0.10272	-7.03522	1.99e-12	1.73e-11	FAM86C2P		ENSG00000178809	47.9219	1.02726	0.243583	4.21729	2.47e-05	0.000101426	TRIM73
ENSG00000108479	1246.3	-0.722583	0.0530555	-13.6194	3.07e-42	1.51e-40	GALK1		ENSG00000184486	180.682	1.02768	0.239371	4.29323	1.76e-05	7.36e-05	POU3F2
ENSG00000121440	136.302	-0.722306	0.165807	-4.35631	1.32e-05	5.63e-05	PDZRN3		ENSG00000225532	26.9528	1.02785	0.332755	3.0889	0.00200898	0.00593125	AL731684.1
ENSG00000176410	1057.15	-0.722245	0.0684514	-10.5512	5.01e-26	1.09e-24	DNAJC30		ENSG00000183833	63.696	1.02789	0.237223	4.333	1.47e-05	6.21e-05	MAATS1
ENSG00000104369	636.565	-0.722036	0.0795267	-9.07917	1.09e-19	1.6e-18	JPH1		ENSG00000254995	21.7551	1.02829	0.4159	2.47244	0.0134193	0.0323564	STX16-NPEPL1
ENSG00000138399	894.767	-0.721971	0.0776747	-9.2948	1.47e-20	2.31e-19	FASTKD1		ENSG00000111254	67.7719	1.02834	0.305844	3.36231	0.000772935	0.00248069	AKAP3
ENSG00000261335	50.3089	-0.721953	0.242045	-2.98272	0.00285697	0.00813978	AC005837.1		ENSG00000273151	148.962	1.02855	0.179343	5.73509	9.75e-09	5.97e-08	AC073957.3
ENSG00000221963	340.136	-0.721779	0.0996507	-7.24309	4.39e-13	4.07e-12	APOL6		ENSG00000124067	217.904	1.02888	0.148387	6.93376	4.1e-12	3.46e-11	SLC12A4
ENSG00000148303	48675.8	-0.721611	0.0432435	-16.6872	1.63e-62	1.68e-60	RPL7A		ENSG00000070985	31.4579	1.02993	0.347465	2.96413	0.00303536	0.00859902	TRPM5
ENSG00000129422	1002.81	-0.721327	0.0632258	-11.4087	3.78e-30	1.02e-28	MTUS1		ENSG00000223773	34.4198	1.03067	0.313413	3.28853	0.00100712	0.00315911	CD99P1
ENSG00000069998	3275.99	-0.720836	0.0477048	-15.1103	1.38e-51	9.83e-50	HDHD5		ENSG00000279059	187.427	1.03132	0.150037	6.87377	6.25e-12	5.21e-11	AC007485.2
ENSG00000183579	554.415	-0.72054	0.0962918	-7.48288	7.27e-14	7.18e-13	ZNRF3		ENSG00000114735	1177.21	1.03141	0.0625277	16.4953	3.97e-61	3.96e-59	HEMK1
ENSG00000143390	2177.61	-0.720298	0.0440256	-16.3609	3.64e-60	3.52e-58	RFX5		ENSG00000132563	273.484	1.03189	0.203185	5.07856	3.8e-07	1.97e-06	REEP2
ENSG00000204856	679.507	-0.72024	0.0739398	-9.7409	2.02e-22	3.52e-21	FAM216A		ENSG00000206530	236.223	1.0321	0.129701	7.95757	1.75e-15	1.95e-14	CFAP44
ENSG00000102054	4208.48	-0.720134	0.0564662	-12.7534	2.99e-37	1.13e-35	RBBP7		ENSG00000272556	327.133	1.03216	0.142386	7.24903	4.2e-13	3.91e-12	GTF2IP13
ENSG00000162722	70.1836	-0.720038	0.199621	-3.60703	0.000309724	0.00106699	TRIM58		ENSG00000204528	15.7982	1.03266	0.43716	2.36219	0.0181672	0.0421269	PSORS1C3
ENSG00000111684	944.862	-0.719696	0.0739662	-9.73006	2.24e-22	3.91e-21	LPCAT3		ENSG00000269821	232.394	1.03296	0.159921	6.45917	1.05e-10	7.88e-10	KCNQ1OT1
ENSG00000126247	4506.89	-0.719685	0.0667468	-10.7823	4.17e-27	9.64e-26	CAPNS1		ENSG00000131503	109.9	1.03409	0.222001	4.65801	3.19e-06	1.48e-05	ANKHD1
ENSG00000161267	2129.96	-0.719097	0.0535322	-13.433	3.88e-41	1.8e-39	BDH1		ENSG00000069696	61.0877	1.03467	0.239199	4.32556	1.52e-05	6.41e-05	DRD4
ENSG00000277459	40.9831	-0.719041	0.255482	-2.81445	0.00488611	0.0132151	AP001527.2		ENSG00000146477	267.024	1.03708	0.169257	6.12724	8.94e-10	6.11e-09	SLC22A3
ENSG00000197771	2357.94	-0.718838	0.0389984	-18.4325	7.21e-76	1.16e-73	MCMBP		ENSG00000135835	31.3754	1.03711	0.373643	2.77567	0.00550878	0.0147118	KIAA1614
ENSG00000145604	1687.81	-0.718558	0.0559966	-12.8322	1.08e-37	4.21e-36	SKP2		ENSG00000167614	84.6979	1.03807	0.217737	4.76756	1.86e-06	8.91e-06	TTYH1
ENSG00000135245	691.314	-0.718393	0.114101	-6.29612	3.05e-10	2.19e-09	HILPDA		ENSG00000228201	26.8908	1.03884	0.388184	2.67616	0.00744708	0.0192207	AL022341.1
ENSG00000154914	623.553	-0.718168	0.0871169	-8.24373	1.67e-16	2e-15	USP43		ENSG00000223820	38.6024	1.03886	0.270838	3.83571	0.000125205	0.00045942	CFL1P1
ENSG00000166823	660.892	-0.71782	0.0922929	-7.77763	7.39e-15	7.86e-14	MESP1		ENSG00000136040	35.2316	1.03919	0.36869	2.81859	0.00482352	0.0130567	PLXNC1
ENSG00000033011	638.176	-0.717683	0.0755561	-9.49867	2.13e-21	3.5e-20	ALG1		ENSG00000280385	87.2317	1.03942	0.247079	4.20683	2.59e-05	0.000105884	AP000648.4
ENSG00000100228	282.314	-0.71745	0.139894	-5.12854	2.92e-07	1.53e-06	RAB36		ENSG00000157734	94.1288	1.03943	0.19168	5.42271	5.87e-08	3.34e-07	SNX22
ENSG00000001630	518.154	-0.716364	0.116716	-6.13766	8.37e-10	5.74e-09	CYP51A1		ENSG00000263006	157.06	1.03996	0.152757	6.80797	9.9e-12	8.11e-11	ROCK1P1
ENSG00000149418	4307.98	-0.716228	0.050997	-14.0445	8.32e-45	4.56e-43	ST14		ENSG00000166750	1364.5	1.0402	0.0785478	13.2428	4.96e-40	2.18e-38	SLFN5
ENSG00000266094	329.347	-0.716219	0.0999148	-7.1683	7.59e-13	6.89e-12	RASSF5		ENSG00000254840	36.0542	1.04056	0.343318	3.0309	0.00243822	0.00705467	AC024405.2
ENSG00000136261	1253.52	-0.715909	0.0623949	-11.4738	1.79e-30	4.93e-29	BZW2		ENSG00000138411	83.5929	1.04061	0.273684	3.80223	0.000143399	0.000521824	HECW2
ENSG00000111252	650.246	-0.715899	0.0704418	-10.163	2.9e-24	5.69e-23	SH2B3		ENSG00000074317	55.5272	1.04073	0.437497	2.37882	0.0173679	0.0404981	SNCB
ENSG00000145945	352.774	-0.715713	0.09362	-7.64487	2.09e-14	2.15e-13	FAM50B		ENSG00000187240	1470.91	1.04107	0.0779099	13.3625	1e-40	4.54e-39	DYNC2H1
ENSG00000131979	822.346	-0.714779	0.0728774	-9.80797	1.04e-22	1.86e-21	GCH1		ENSG00000122481	103.024	1.04115	0.178095	5.84604	5.03e-09	3.19e-08	RWDD3
ENSG00000111328	1919.89	-0.714376	0.081036	-8.81554	1.19e-18	1.65e-17	CDK2AP1		ENSG00000248712	39.9417	1.04158	0.313053	3.32717	0.000877339	0.00278506	CCDC153
ENSG00000123407	494.995	-0.713166	0.0941207	-7.57714	3.53e-14	3.57e-13	HOXC12		ENSG00000145014	170.127	1.04186	0.149169	6.98444	2.86e-12	2.45e-11	TMEM44
ENSG00000079819	2077.42	-0.713045	0.0456609	-15.6161	5.65e-55	4.58e-53	EPB41L2		ENSG00000169282	35.4432	1.04257	0.415092	2.51166	0.0120163	0.0293035	KCNAB1
ENSG00000149328	1134.25	-0.712576	0.078139	-9.11934	7.56e-20	1.12e-18	GLB1L2		ENSG00000271344	17.3239	1.04284	0.377171	2.76491	0.00569386	0.0151359	AC018638.6
ENSG00000134247	3264.3	-0.711875	0.0361923	-19.6692	3.96e-86	8.34e-84	PTGFRN		ENSG00000254718	25.793	1.04321	0.363287	2.87158	0.00408425	0.0112555	AL157756.1
ENSG00000108639	9851.52	-0.710962	0.0419338	-16.9544	1.79e-64	2.06e-62	SYNGR2		ENSG00000099251	99.008	1.04356	0.174857	5.96807	2.4e-09	1.57e-08	HSD17B7P2
ENSG00000251669	239.028	-0.71077	0.12212	-5.82028	5.87e-09	3.69e-08	FAM86EP		ENSG00000258102	27.1564	1.0451	0.332749	3.1408	0.00168486	0.00504613	MAP1LC3B2
ENSG00000272931	33.8198	-0.710584	0.284991	-2.49336	0.012654	0.0307083	AC099568.2		ENSG00000180953	64.1097	1.04518	0.224542	4.6547	3.24e-06	1.5e-05	AC015871.1
ENSG00000107833	1952.52	-0.710409	0.0504943	-14.0691	5.88e-45	3.23e-43	NPM3		ENSG00000107954	57.0038	1.04562	0.26461	3.95156	7.76e-05	0.000295135	NEURL1
ENSG00000136875	1279.6	-0.709942	0.0650599	-10.9121	1.01e-27	2.41e-26	PRPF4		ENSG00000273139	21.649	1.04628	0.392579	2.66515	0.00769551	0.0197969	AC007663.3
ENSG00000262227	60.0145	-0.709838	0.248877	-2.85216	0.00434235	0.0118946	AC004771.3		ENSG00000135436	29.9129	1.0475	0.341348	3.0687	0.00214991	0.00630495	FAM186B
ENSG00000021762	1857.32	-0.709806	0.0676017	-10.4998	8.65e-26	1.85e-24	OSBPL5		ENSG00000162676	120.08	1.0479	0.310505	3.37482	0.000738653	0.00238187	GFI1
ENSG00000101447	1234.52	-0.70973	0.0679122	-10.4507	1.45e-25	3.07e-24	FAM83D		ENSG00000168477	29.0372	1.04869	0.380838	2.75364	0.00589367	0.0156126	TNXB
ENSG00000266066	33.0236	-0.709728	0.292929	-2.42286	0.0153987	0.0364641	POLRMTP1		ENSG00000273891	30.9553	1.05021	0.324776	3.23365	0.00122219	0.003759	AL731566.2
ENSG00000178409	241.641	-0.709717	0.10569	-6.71508	1.88e-11	1.51e-10	BEND3		ENSG00000244693	31.6357	1.05027	0.327668	3.20529	0.00134928	0.00411291	CTAGE8
ENSG00000088367	1965.52	-0.709001	0.0600338	-11.81	3.46e-32	1.03e-30	EPB41L1		ENSG00000280149	29.0921	1.05167	0.322257	3.26346	0.00110062	0.00342236	AC004877.2
ENSG00000127774	124.247	-0.70883	0.161958	-4.37663	1.21e-05	5.16e-05	EMC6		ENSG00000259366	48.8524	1.05174	0.304726	3.45144	0.000557605	0.00183949	AC108449.2
ENSG00000113460	1086.18	-0.708803	0.0668414	-10.6043	2.85e-26	6.26e-25	BRIX1		ENSG00000140600	105.332	1.05315	0.234223	4.49634	6.91e-06	3.07e-05	SH3GL3
ENSG00000105447	1128.54	-0.708651	0.0597952	-11.8513	2.12e-32	6.4e-31	GRWD1		ENSG00000149735	27.0356	1.05399	0.359768	2.92963	0.00339364	0.00952344	GPHA2
ENSG00000188021	2449.98	-0.708552	0.0638193	-11.1025	1.22e-28	3.05e-27	UBQLN2		ENSG00000144668	25.3362	1.0541	0.412409	2.55596	0.0105895	0.0262137	ITGA9
ENSG00000269388	37.8848	-0.70841	0.304596	-2.32573	0.0200329	0.0458296	AC018755.3		ENSG00000100918	26.7792	1.05467	0.362588	2.90872	0.00362911	0.0101163	REC8
ENSG00000244716	291.276	-0.707966	0.278799	-2.53934	0.0111063	0.0273233	BX679664.3		ENSG00000135596	2003.26	1.05496	0.0816127	12.9265	3.19e-38	1.27e-36	MICAL1
ENSG00000155463	2985.01	-0.707549	0.0452779	-15.6268	4.78e-55	3.9e-53	OXA1L		ENSG00000262580	254.128	1.05594	0.156847	6.73227	1.67e-11	1.34e-10	AC087741.1
ENSG00000213694	69.3848	-0.707056	0.251793	-2.80809	0.00498367	0.0134551	S1PR3		ENSG00000135424	116.439	1.05594	0.194038	5.44189	5.27e-08	3.01e-07	ITGA7
ENSG00000116649	3289.07	-0.706871	0.0901744	-7.83894	4.54e-15	4.91e-14	SRM		ENSG00000248971	50.1962	1.05627	0.23696	4.45761	8.29e-06	3.64e-05	KRT8P46
ENSG00000135900	1113.53	-0.706595	0.0729621	-9.68442	3.51e-22	6.04e-21	MRPL44		ENSG00000154099	32.9268	1.05656	0.344979	3.06267	0.00219375	0.00642334	DNAAF1
ENSG00000155066	2346.91	-0.706583	0.0636134	-11.1075	1.15e-28	2.89e-27	PROM2		ENSG00000164463	581.663	1.05704	0.100266	10.5423	5.51e-26	1.19e-24	CREBRF
ENSG00000197006	1566.15	-0.706283	0.0590535	-11.9601	5.75e-33	1.77e-31	METTL9		ENSG00000270223	70.4505	1.05788	0.307514	3.4401	0.000581502	0.0019137	#N/A
ENSG00000174804	946.417	-0.706232	0.0638823	-11.0552	2.07e-28	5.12e-27	FZD4		ENSG00000169330	69.1883	1.058	0.208296	5.07929	3.79e-07	1.96e-06	MINAR1
ENSG00000119471	2163.19	-0.705893	0.0494615	-14.2716	3.29e-46	1.87e-44	HSDL2		ENSG00000260711	26.7614	1.05942	0.341193	3.10504	0.00190251	0.00563748	AL121839.2
ENSG00000100294	1020.22	-0.705785	0.0770651	-9.15829	5.27e-20	7.93e-19	MCAT		ENSG00000188760	188.146	1.06095	0.173651	6.10968	9.98e-10	6.79e-09	TMEM198
ENSG00000160014	8521.85	-0.705647	0.0335837	-21.0116	5.14e-98	1.6e-95	CALM3		ENSG00000236404	226.492	1.0611	0.112225	9.45516	3.23e-21	5.25e-20	VLDLR-AS1
ENSG00000139626	47.9262	-0.705061	0.263594	-2.6748	0.00747744	0.0192876	ITGB7		ENSG00000228606	27.9948	1.06132	0.370329	2.86588	0.00415854	0.0114395	AL139011.1
ENSG00000268686	221.708	-0.704926	0.112758	-6.25168	4.06e-10	2.87e-09	AC010643.1		ENSG00000172086	417.216	1.06187	0.125074	8.48992	2.07e-17	2.63e-16	KRCC1
ENSG00000169105	811.252	-0.704344	0.0724832	-9.71733	2.54e-22	4.41e-21	CHST14		ENSG00000119737	52.8393	1.06204	0.258126	4.1144	3.88e-05	0.000154681	GPR75
ENSG00000137563	903.918	-0.704299	0.0761055	-9.25425	2.16e-20	3.33e-19	GGH		ENSG00000196739	243.995	1.06232	0.159234	6.67147	2.53e-11	2.01e-10	COL27A1
ENSG00000141905	5612.63	-0.704017	0.0723557	-9.72995	2.25e-22	3.91e-21	NFIC		ENSG00000227218	102.032	1.06234	0.189092	5.61814	1.93e-08	1.15e-07	AL157935.1
ENSG00000204519	255.335	-0.703787	0.114928	-6.12373	9.14e-10	6.24e-09	ZNF551		ENSG00000198939	30.4824	1.06342	0.414583	2.56504	0.0103163	0.0256084	ZFP2
ENSG00000016391	1460.58	-0.703755	0.0560428	-12.5574	3.62e-36	1.31e-34	CHDH		ENSG00000214814	63.1061	1.06347	0.23588	4.50854	6.53e-06	2.9e-05	FER1L6
ENSG00000149218	6496.89	-0.703217	0.0558441	-12.5925	2.32e-36	8.46e-35	ENDOD1		ENSG00000251136	207.122	1.06407	0.138842	7.66393	1.8e-14	1.87e-13	AF117829.1
ENSG00000152056	518.93	-0.702692	0.0815563	-8.61603	6.93e-18	9.11e-17	AP1S3		ENSG00000157927	113.805	1.06507	0.388326	2.74272	0.0060933	0.0160905	RADIL
ENSG00000096060	11229.5	-0.70267	0.0478845	-14.6743	9.42e-49	5.96e-47	FKBP5		ENSG00000069812	86.9456	1.06514	0.237273	4.48907	7.15e-06	3.17e-05	HES2
ENSG00000152127	2105.01	-0.701935	0.0562186	-12.4858	8.92e-36	3.16e-34	MGAT5		ENSG00000248334	120.768	1.06567	0.174811	6.09614	1.09e-09	7.36e-09	WHAMMP2
ENSG00000181938	268.645	-0.701925	0.129061	-5.43869	5.37e-08	3.06e-07	GINS3		ENSG00000196421	67.2607	1.06578	0.258631	4.12086	3.77e-05	0.000150759	C20orf204
ENSG00000246465	281.95	-0.701626	0.100314	-6.99433	2.67e-12	2.3e-11	AC138904.1		ENSG00000121716	224.124	1.0664	0.161326	6.61018	3.84e-11	3e-10	PILRB
ENSG00000063241	2880.32	-0.701211	0.0458847	-15.282	1.01e-52	7.53e-51	ISOC2		ENSG00000115423	72.2987	1.06646	0.321626	3.31584	0.000913695	0.00289021	DNAH6
ENSG00000085871	1192.39	-0.701008	0.0686607	-10.2097	1.79e-24	3.57e-23	MGST2		ENSG00000171121	56.2821	1.06694	0.233661	4.56618	4.97e-06	2.25e-05	KCNMB3
ENSG00000204264	130.694	-0.700527	0.157075	-4.45982	8.2e-06	3.6e-05	PSMB8		ENSG00000165949	21.1505	1.06752	0.444391	2.40222	0.016296	0.0383296	IFI27
ENSG00000003989	997.941	-0.700362	0.0700927	-9.99193	1.65e-23	3.09e-22	SLC7A2		ENSG00000278631	15.8615	1.06789	0.44848	2.38113	0.0172596	0.0403071	AC097374.2
ENSG00000168806	751.932	-0.699487	0.0659074	-10.6132	2.59e-26	5.72e-25	LCMT2		ENSG00000246090	35.2136	1.06792	0.34746	3.0735	0.00211565	0.00621153	AP002026.1
ENSG00000118507	305.181	-0.699076	0.0994029	-7.03276	2.02e-12	1.76e-11	AKAP7		ENSG00000279520	23.9322	1.06813	0.352324	3.03166	0.00243211	0.00703857	AC093525.8
ENSG00000167775	1824.03	-0.699061	0.0665459	-10.5049	8.2e-26	1.76e-24	CD320		ENSG00000166762	195.207	1.07024	0.164499	6.50609	7.71e-11	5.85e-10	CATSPER2
ENSG00000181104	295.311	-0.698995	0.119456	-5.85149	4.87e-09	3.09e-08	F2R		ENSG00000227107	23.7582	1.07054	0.33382	3.20693	0.0013416	0.00409191	AC104667.1
ENSG00000142634	855.604	-0.698836	0.0688194	-10.1546	3.16e-24	6.17e-23	EFHD2		ENSG00000244479	124.499	1.07151	0.159666	6.71096	1.93e-11	1.55e-10	OR2A1-AS1
ENSG00000224578	98.1803	-0.698798	0.198015	-3.52901	0.000417121	0.00140777	HNRNPA1P48		ENSG00000197182	239.831	1.07241	0.132056	8.12089	4.63e-16	5.34e-15	MIRLET7BHG
ENSG00000160867	472.111	-0.698757	0.0969276	-7.20905	5.63e-13	5.18e-12	FGFR4		ENSG00000262903	18.31	1.0729	0.46502	2.30721	0.021043	0.0477777	AC027796.4
ENSG00000089177	515.655	-0.698543	0.098485	-7.09289	1.31e-12	1.17e-11	KIF16B		ENSG00000201512	15.8152	1.07357	0.469425	2.28698	0.022197	0.0499829	SNORA71C
ENSG00000175471	88.3933	-0.698431	0.181579	-3.84643	0.000119853	0.000441219	MCTP1		ENSG00000160469	224.207	1.07373	0.148093	7.25038	4.16e-13	3.87e-12	BRSK1
ENSG00000177383	3210.36	-0.698301	0.0512272	-13.6315	2.6e-42	1.28e-40	MAGEF1		ENSG00000120075	173.728	1.07393	0.14813	7.24993	4.17e-13	3.88e-12	HOXB5
ENSG00000137992	6222.76	-0.697936	0.0477118	-14.6282	1.86e-48	1.16e-46	DBT		ENSG00000108839	63.8231	1.07426	0.249441	4.30666	1.66e-05	6.95e-05	ALOX12
ENSG00000184709	1258.7	-0.697733	0.144937	-4.81405	1.48e-06	7.15e-06	LRRC26		ENSG00000185864	226.972	1.07506	0.138033	7.78841	6.79e-15	7.23e-14	NPIPB4
ENSG00000131153	642.042	-0.697353	0.103389	-6.74495	1.53e-11	1.24e-10	GINS2		ENSG00000227354	222.02	1.07545	0.184327	5.83447	5.4e-09	3.41e-08	RBM26-AS1
ENSG00000181284	143.789	-0.696291	0.154055	-4.51976	6.19e-06	2.76e-05	TMEM102		ENSG00000170049	117.856	1.07575	0.201482	5.3392	9.34e-08	5.19e-07	KCNAB3
ENSG00000058804	2336.97	-0.696215	0.04597	-15.145	8.18e-52	5.82e-50	NDC1		ENSG00000008128	112.651	1.07579	0.198401	5.42231	5.88e-08	3.34e-07	CDK11A
ENSG00000172009	2490.76	-0.695475	0.04023	-17.2875	5.85e-67	7.39e-65	THOP1		ENSG00000161010	826.962	1.07584	0.0727324	14.7918	1.65e-49	1.06e-47	MRNIP
ENSG00000180806	214.671	-0.694927	0.109007	-6.37509	1.83e-10	1.34e-09	HOXC9		ENSG00000100038	18.9375	1.07592	0.435136	2.47261	0.0134132	0.0323469	TOP3B
ENSG00000169756	1487.35	-0.694794	0.0561645	-12.3707	3.77e-35	1.3e-33	LIMS1		ENSG00000197608	370.244	1.07679	0.0960335	11.2127	3.53e-29	9.07e-28	ZNF841
ENSG00000173905	1881.21	-0.694743	0.0422802	-16.4319	1.13e-60	1.11e-58	GOLIM4		ENSG00000134874	463.934	1.07711	0.124064	8.6819	3.89e-18	5.19e-17	DZIP1
ENSG00000176623	1128.48	-0.694688	0.07703	-9.01841	1.91e-19	2.76e-18	RMDN1		ENSG00000121310	2317.35	1.07726	0.0648714	16.606	6.31e-62	6.38e-60	ECHDC2
ENSG00000084070	1812.78	-0.694242	0.052471	-13.231	5.81e-40	2.54e-38	SMAP2		ENSG00000276698	22.9268	1.07744	0.399219	2.69886	0.00695769	0.0181001	AL136295.6
ENSG00000236439	54.981	-0.694079	0.246245	-2.81865	0.00482257	0.0130555	AC099336.2		ENSG00000267270	22.1068	1.07759	0.40451	2.66395	0.007723	0.0198597	PARD6G-AS1
ENSG00000114767	829.397	-0.693903	0.0615783	-11.2686	1.87e-29	4.87e-28	RRP9		ENSG00000104853	653.397	1.07831	0.109734	9.82659	8.65e-23	1.56e-21	CLPTM1
ENSG00000102007	443.145	-0.693614	0.0957102	-7.24702	4.26e-13	3.96e-12	PLP2		ENSG00000277443	2507.92	1.07874	0.0633708	17.0226	5.58e-65	6.57e-63	MARCKS
ENSG00000213853	1337.85	-0.693251	0.0548956	-12.6285	1.47e-36	5.45e-35	EMP2		ENSG00000262410	22.3436	1.07949	0.363834	2.96697	0.00300747	0.00852559	AC024361.1
ENSG00000100216	2672.57	-0.693237	0.0475576	-14.5768	3.95e-48	2.43e-46	TOMM22		ENSG00000204149	623.014	1.0798	0.0854334	12.6391	1.29e-36	4.78e-35	AGAP6
ENSG00000163362	89.3294	-0.693093	0.207315	-3.3432	0.00082819	0.0026446	INAVA		ENSG00000170044	44.0178	1.08069	0.244155	4.42625	9.59e-06	4.17e-05	ZPLD1
ENSG00000178821	684.023	-0.692957	0.0953559	-7.26706	3.67e-13	3.44e-12	TMEM52		ENSG00000256546	80.1647	1.0811	0.291644	3.70693	0.000209786	0.000742649	AC156455.1
ENSG00000070423	2201.29	-0.69275	0.0590166	-11.7382	8.12e-32	2.4e-30	RNF126		ENSG00000197860	930.934	1.0819	0.0639611	16.9149	3.49e-64	3.99e-62	SGTB
ENSG00000116830	1327.06	-0.692647	0.0509578	-13.5926	4.43e-42	2.16e-40	TTF2		ENSG00000254461	23.9172	1.08193	0.408991	2.64536	0.00816048	0.0208563	AP001107.4
ENSG00000140057	144.668	-0.692501	0.161737	-4.28164	1.86e-05	7.73e-05	AK7		ENSG00000239827	21.1922	1.08392	0.456531	2.37425	0.0175848	0.0409558	SUGT1P3
ENSG00000211450	1409.39	-0.692179	0.0592297	-11.6863	1.5e-31	4.36e-30	SELENOH		ENSG00000133067	36.7848	1.08468	0.406782	2.66649	0.00766474	0.0197275	LGR6
ENSG00000079459	5526.95	-0.691794	0.0495358	-13.9655	2.53e-44	1.35e-42	FDFT1		ENSG00000205913	178.728	1.08557	0.143501	7.56492	3.88e-14	3.91e-13	SRRM2-AS1
ENSG00000132688	50.0038	-0.691666	0.24505	-2.82255	0.00476438	0.0129155	NES		ENSG00000244701	39.9937	1.08728	0.296543	3.66651	0.000245883	0.000861257	AC004918.1
ENSG00000177508	724.687	-0.691491	0.0631521	-10.9496	6.67e-28	1.61e-26	IRX3		ENSG00000182168	116.188	1.0882	0.254045	4.28348	1.84e-05	7.67e-05	UNC5C
ENSG00000122565	6215.18	-0.690769	0.0646972	-10.677	1.3e-26	2.94e-25	CBX3		ENSG00000172432	5032.69	1.08855	0.0443795	24.5281	7.4e-133	4.08e-130	GTPBP2
ENSG00000256196	45.7808	-0.690693	0.220147	-3.13742	0.00170442	0.00509714	AP003721.1		ENSG00000275560	35.0168	1.08912	0.36134	3.01412	0.00257728	0.00742139	AC008115.3
ENSG00000136718	1983.49	-0.690615	0.0576415	-11.9812	4.46e-33	1.38e-31	IMP4		ENSG00000267681	30.4598	1.08977	0.341583	3.19035	0.00142102	0.00431232	AC135721.1
ENSG00000163170	696.068	-0.690159	0.107793	-6.40261	1.53e-10	1.13e-09	BOLA3		ENSG00000233006	211.912	1.09036	0.118829	9.1759	4.48e-20	6.75e-19	MIR3936HG
ENSG00000126262	76.2472	-0.689789	0.176166	-3.91558	9.02e-05	0.000339	FFAR2		ENSG00000279924	31.9363	1.09212	0.311399	3.50713	0.000452975	0.00151908	AL356585.4
ENSG00000132182	6772.31	-0.689784	0.0696363	-9.90553	3.94e-23	7.21e-22	NUP210		ENSG00000262188	33.4116	1.09236	0.331924	3.291	0.00099831	0.0031349	LINC01978
ENSG00000005513	110.687	-0.68963	0.214856	-3.20974	0.00132857	0.00405597	SOX8		ENSG00000147003	61.8116	1.0924	0.308269	3.54367	0.000394598	0.00133646	CLTRN
ENSG00000259471	40.9356	-0.68952	0.256134	-2.69203	0.00710181	0.0184238	LINC01169		ENSG00000120093	249.569	1.09355	0.162021	6.74943	1.48e-11	1.2e-10	HOXB3
ENSG00000126709	325.288	-0.689404	0.113537	-6.07208	1.26e-09	8.5e-09	IFI6		ENSG00000179698	30.4624	1.09394	0.351745	3.11004	0.0018706	0.00555118	WDR97
ENSG00000136379	483.608	-0.689095	0.0819056	-8.41328	3.99e-17	4.97e-16	ABHD17C		ENSG00000224271	35.9538	1.09411	0.289082	3.78479	0.000153838	0.000555984	AL117329.1
ENSG00000101187	707.573	-0.689006	0.0713486	-9.6569	4.6e-22	7.83e-21	SLCO4A1		ENSG00000225506	19.1376	1.09467	0.452399	2.41969	0.0155336	0.0367634	CYP4A22-AS1
ENSG00000126005	1501.73	-0.688765	0.0900691	-7.64707	2.06e-14	2.12e-13	MMP24OS		ENSG00000116717	1263.19	1.09487	0.0830113	13.1894	1.01e-39	4.35e-38	GADD45A
ENSG00000004487	2275.9	-0.688497	0.0473219	-14.5492	5.91e-48	3.62e-46	KDM1A		ENSG00000232160	80.3526	1.0953	0.211954	5.16763	2.37e-07	1.26e-06	RAP2C-AS1
ENSG00000196372	1081.19	-0.688294	0.0716494	-9.60641	7.51e-22	1.27e-20	ASB13		ENSG00000271553	31.7316	1.09604	0.323136	3.39189	0.000694129	0.00225062	AC018638.7
ENSG00000175305	185.346	-0.687657	0.12811	-5.3677	7.97e-08	4.46e-07	CCNE2		ENSG00000213462	184.733	1.09762	0.139376	7.87524	3.4e-15	3.71e-14	ERV3-1
ENSG00000059145	1178.98	-0.687193	0.0558329	-12.308	8.2e-35	2.79e-33	UNKL		ENSG00000226007	36.9162	1.09802	0.283577	3.87204	0.000107926	0.000400902	BX005266.2
ENSG00000059378	987.972	-0.687082	0.0674655	-10.1842	2.33e-24	4.6e-23	PARP12		ENSG00000271335	46.7792	1.09864	0.308575	3.56037	0.000370337	0.00126022	AL117336.2
ENSG00000127955	4321.86	-0.686801	0.0483448	-14.2063	8.37e-46	4.72e-44	GNAI1		ENSG00000251396	26.0241	1.09959	0.401849	2.73633	0.0062128	0.0163777	LINC01301
ENSG00000103855	2883.52	-0.686782	0.0572267	-12.0011	3.51e-33	1.09e-31	CD276		ENSG00000186166	607.981	1.09979	0.0858957	12.8038	1.56e-37	6e-36	CCDC84
ENSG00000186205	3526.4	-0.686403	0.0444465	-15.4434	8.36e-54	6.41e-52	36951		ENSG00000231305	91.349	1.10032	0.187809	5.85875	4.66e-09	2.97e-08	AC112484.1
ENSG00000162302	1658.44	-0.686228	0.0538943	-12.7328	3.88e-37	1.47e-35	RPS6KA4		ENSG00000279306	23.2229	1.10043	0.381782	2.88234	0.00394732	0.0109257	AL139288.2
ENSG00000126878	3690.4	-0.686066	0.0527346	-13.0098	1.08e-38	4.38e-37	AIF1L		ENSG00000171658	21.477	1.10045	0.370179	2.97276	0.00295139	0.00838497	NMRAL2P
ENSG00000135454	603.01	-0.685925	0.0815291	-8.41325	3.99e-17	4.97e-16	B4GALNT1		ENSG00000157388	52.0818	1.10068	0.259509	4.24138	2.22e-05	9.17e-05	CACNA1D
ENSG00000263528	115.255	-0.684646	0.173584	-3.94417	8.01e-05	0.000303721	IKBKE		ENSG00000172379	431.677	1.10076	0.141178	7.797	6.34e-15	6.77e-14	ARNT2
ENSG00000103187	1058.82	-0.683924	0.0733593	-9.32293	1.13e-20	1.78e-19	COTL1		ENSG00000248923	22.2526	1.10165	0.47471	2.32069	0.0203038	0.0463348	MTND5P11
ENSG00000160318	47.141	-0.683871	0.269956	-2.53326	0.0113006	0.0277486	CLDND2		ENSG00000210140	2101.83	1.10166	0.155327	7.09251	1.32e-12	1.17e-11	MT-TC
ENSG00000123080	745.429	-0.68379	0.0848016	-8.06341	7.42e-16	8.46e-15	CDKN2C		ENSG00000271254	1101.36	1.10254	0.0712812	15.4674	5.75e-54	4.45e-52	AC240274.1
ENSG00000203999	345.769	-0.683721	0.102112	-6.69577	2.15e-11	1.71e-10	LINC01270		ENSG00000244509	129.417	1.10298	0.269152	4.09799	4.17e-05	0.000165479	APOBEC3C
ENSG00000172053	3598.05	-0.683717	0.0660766	-10.3473	4.3e-25	8.81e-24	QARS		ENSG00000143847	179.538	1.10342	0.339529	3.24986	0.00115461	0.00356991	PPFIA4
ENSG00000121211	230.631	-0.683699	0.130314	-5.24655	1.55e-07	8.4e-07	MND1		ENSG00000170835	77.3303	1.10425	0.204826	5.39116	7e-08	3.95e-07	CEL
ENSG00000265688	461.329	-0.683512	0.0867944	-7.87507	3.41e-15	3.71e-14	MAFG-DT		ENSG00000018869	131.43	1.10451	0.180882	6.10627	1.02e-09	6.93e-09	ZNF582
ENSG00000277203	352.587	-0.68327	0.0958597	-7.12781	1.02e-12	9.16e-12	F8A1		ENSG00000283050	280.458	1.10489	0.12274	9.00186	2.22e-19	3.2e-18	GTF2IP12
ENSG00000167034	6486.02	-0.683202	0.0740725	-9.22342	2.88e-20	4.4e-19	NKX3-1		ENSG00000266896	17.896	1.10558	0.443298	2.49398	0.0126318	0.0306602	AL354892.3
ENSG00000049283	1783.5	-0.683038	0.0779856	-8.75852	1.98e-18	2.69e-17	EPN3		ENSG00000157999	49.1266	1.1057	0.2626	4.21059	2.55e-05	0.000104266	ANKRD61
ENSG00000196313	3564.76	-0.682809	0.0791308	-8.62886	6.2e-18	8.16e-17	POM121		ENSG00000176681	94.2573	1.10579	0.204767	5.40023	6.66e-08	3.76e-07	LRRC37A
ENSG00000137824	2030.98	-0.681994	0.0492706	-13.8418	1.43e-43	7.38e-42	RMDN3		ENSG00000107249	22.3306	1.10589	0.399827	2.76591	0.00567636	0.0150971	GLIS3
ENSG00000114993	927.575	-0.681676	0.0742213	-9.18438	4.14e-20	6.26e-19	RTKN		ENSG00000136205	214.574	1.10598	0.16521	6.6944	2.17e-11	1.73e-10	TNS3
ENSG00000168394	655.35	-0.681639	0.0904176	-7.53879	4.74e-14	4.74e-13	TAP1		ENSG00000109927	55.2346	1.10685	0.306824	3.60746	0.000309211	0.00106565	TECTA
ENSG00000184840	4388.11	-0.680612	0.0520847	-13.0674	5.06e-39	2.09e-37	TMED9		ENSG00000166436	719.472	1.10741	0.0907409	12.2041	2.96e-34	9.74e-33	TRIM66
ENSG00000162729	889.785	-0.680501	0.0734618	-9.26334	1.98e-20	3.08e-19	IGSF8		ENSG00000133624	646.227	1.10807	0.0782244	14.1652	1.5e-45	8.41e-44	ZNF767P
ENSG00000118242	346.099	-0.6805	0.100893	-6.74479	1.53e-11	1.24e-10	MREG		ENSG00000105538	58.2302	1.10861	0.283992	3.90366	9.47e-05	0.00035511	RASIP1
ENSG00000184117	4921.66	-0.680423	0.0358922	-18.9574	3.84e-80	7.26e-78	NIPSNAP1		ENSG00000198467	153.283	1.10874	0.182945	6.0605	1.36e-09	9.11e-09	TPM2
ENSG00000139197	2553.94	-0.680344	0.0446633	-15.2327	2.14e-52	1.59e-50	PEX5		ENSG00000249395	49.7428	1.11005	0.465574	2.38425	0.0171138	0.0400209	CASC9
ENSG00000186767	711.093	-0.679855	0.0675769	-10.0605	8.26e-24	1.58e-22	SPIN4		ENSG00000136490	131.872	1.11015	0.217653	5.10057	3.39e-07	1.77e-06	LIMD2
ENSG00000222041	40.4776	-0.679251	0.291415	-2.33087	0.0197602	0.0452666	CYTOR		ENSG00000113971	150.628	1.11117	0.164	6.77543	1.24e-11	1.01e-10	NPHP3
ENSG00000177732	3273.9	-0.67918	0.0550041	-12.3478	5.01e-35	1.71e-33	SOX12		ENSG00000185633	654.741	1.11177	0.245226	4.53367	5.8e-06	2.6e-05	NDUFA4L2
ENSG00000103811	3033.94	-0.679135	0.0501397	-13.5448	8.5e-42	4.11e-40	CTSH		ENSG00000281205	104.573	1.11216	0.189919	5.85596	4.74e-09	3.01e-08	#N/A
ENSG00000112996	1648.5	-0.679055	0.0607416	-11.1794	5.14e-29	1.31e-27	MRPS30		ENSG00000211895	14.7695	1.11404	0.445755	2.49922	0.0124468	0.030265	IGHA1
ENSG00000226321	280.393	-0.678689	0.119995	-5.65597	1.55e-08	9.32e-08	CROCC2		ENSG00000268204	48.9993	1.11408	0.326971	3.40727	0.000656172	0.0021396	AC008763.1
ENSG00000075624	38523.7	-0.678293	0.0924768	-7.33474	2.22e-13	2.12e-12	ACTB		ENSG00000129993	37.4889	1.11443	0.33882	3.28915	0.00100492	0.00315337	CBFA2T3
ENSG00000119630	48.1268	-0.678271	0.231686	-2.92754	0.00341655	0.009579	PGF		ENSG00000237491	104.879	1.11647	0.215616	5.17803	2.24e-07	1.19e-06	LINC01409
ENSG00000261104	56.12	-0.678201	0.221948	-3.05568	0.00224553	0.00655717	AC093904.4		ENSG00000140941	3620.87	1.11716	0.0550149	20.3064	1.13e-91	2.84e-89	MAP1LC3B
ENSG00000247092	349.81	-0.677953	0.0953336	-7.11138	1.15e-12	1.03e-11	SNHG10		ENSG00000280138	107.182	1.1182	0.201403	5.55204	2.82e-08	1.66e-07	AC027290.2
ENSG00000137876	4735.26	-0.677729	0.0638841	-10.6087	2.71e-26	5.98e-25	RSL24D1		ENSG00000234771	191.147	1.11824	0.14591	7.66392	1.8e-14	1.87e-13	SLC25A25-AS1
ENSG00000141232	2997.88	-0.677572	0.0516187	-13.1265	2.32e-39	9.78e-38	TOB1		ENSG00000134278	1487.43	1.11844	0.0629761	17.7598	1.45e-70	1.97e-68	SPIRE1
ENSG00000179041	930.176	-0.677454	0.0694427	-9.75559	1.75e-22	3.07e-21	RRS1		ENSG00000223891	69.9707	1.11915	0.238509	4.69227	2.7e-06	1.26e-05	OSER1-DT
ENSG00000270170	1180.06	-0.677197	0.0801527	-8.44884	2.94e-17	3.71e-16	NCBP2AS2		ENSG00000198380	7767.93	1.11961	0.0419064	26.7168	3e-157	2.88e-154	GFPT1
ENSG00000128011	429.153	-0.676871	0.094333	-7.17534	7.21e-13	6.57e-12	LRFN1		ENSG00000267060	28.9732	1.12008	0.343169	3.26394	0.00109875	0.003418	PTGES3L
ENSG00000184178	453.912	-0.676805	0.0821279	-8.24087	1.71e-16	2.04e-15	SCFD2		ENSG00000272153	34.824	1.12197	0.344676	3.25514	0.00113336	0.00351512	AL365330.1
ENSG00000102934	302.975	-0.676599	0.0985155	-6.86795	6.51e-12	5.42e-11	PLLP		ENSG00000105639	39.0968	1.12243	0.341107	3.29055	0.000999914	0.00313956	JAK3
ENSG00000145982	415.179	-0.676077	0.0817641	-8.26863	1.36e-16	1.63e-15	FARS2		ENSG00000167281	66.8563	1.12273	0.364657	3.07887	0.00207789	0.00611173	RBFOX3
ENSG00000108439	1401.24	-0.67573	0.0521397	-12.96	2.06e-38	8.24e-37	PNPO		ENSG00000139946	502.008	1.12351	0.0882311	12.7337	3.84e-37	1.45e-35	PELI2
ENSG00000092445	1244.07	-0.675513	0.0692046	-9.76111	1.65e-22	2.91e-21	TYRO3		ENSG00000204311	60.8943	1.1239	0.274153	4.09953	4.14e-05	0.000164412	PJVK
ENSG00000006831	2689.34	-0.674845	0.0451176	-14.9575	1.39e-50	9.47e-49	ADIPOR2		ENSG00000121577	25.0423	1.12462	0.348487	3.22714	0.00125034	0.00383614	POPDC2
ENSG00000102172	4079.05	-0.674284	0.0424836	-15.8716	9.96e-57	8.66e-55	SMS		ENSG00000130513	8895.81	1.12494	0.127319	8.83556	9.96e-19	1.39e-17	GDF15
ENSG00000155254	1041.92	-0.67353	0.0649796	-10.3652	3.57e-25	7.34e-24	MARVELD1		ENSG00000274487	104.12	1.12537	0.191778	5.86808	4.41e-09	2.81e-08	AC244154.1
ENSG00000168061	726.643	-0.672845	0.0738391	-9.1123	8.07e-20	1.19e-18	SAC3D1		ENSG00000239636	14.8122	1.12828	0.479852	2.35131	0.0187073	0.0431936	AC004865.2
ENSG00000275464	456.101	-0.672281	0.110943	-6.05967	1.36e-09	9.16e-09	FP565260.1		ENSG00000132837	389.358	1.12833	0.121925	9.25428	2.16e-20	3.33e-19	DMGDH
ENSG00000176393	2505.03	-0.671997	0.0627235	-10.7136	8.78e-27	1.99e-25	RNPEP		ENSG00000260276	65.5042	1.12853	0.253225	4.45664	8.33e-06	3.65e-05	AC022167.2
ENSG00000111052	3576.6	-0.671806	0.0527929	-12.7253	4.28e-37	1.61e-35	LIN7A		ENSG00000172006	159.863	1.12906	0.177416	6.36391	1.97e-10	1.43e-09	ZNF554
ENSG00000180011	1538.23	-0.671605	0.0554271	-12.1169	8.59e-34	2.77e-32	ZADH2		ENSG00000242474	58.9286	1.12929	0.222284	5.08039	3.77e-07	1.95e-06	AC093627.5
ENSG00000125505	3011.41	-0.671589	0.0656263	-10.2335	1.4e-24	2.81e-23	MBOAT7		ENSG00000182264	19.0899	1.12956	0.412613	2.73758	0.0061893	0.0163174	IZUMO1
ENSG00000072042	5889.69	-0.670507	0.0467244	-14.3503	1.06e-46	6.18e-45	RDH11		ENSG00000106459	1263.43	1.12982	0.0562878	20.0722	1.29e-89	3.1e-87	NRF1
ENSG00000133627	1061.75	-0.670407	0.0593388	-11.298	1.34e-29	3.52e-28	ACTR3B		ENSG00000249592	238.531	1.12982	0.141661	7.97553	1.52e-15	1.7e-14	AC139887.2
ENSG00000099219	1452.65	-0.67037	0.0518388	-12.9318	2.98e-38	1.19e-36	ERMP1		ENSG00000053438	26.0775	1.13179	0.37765	2.99693	0.00272714	0.00780261	NNAT
ENSG00000112695	3816.7	-0.670255	0.142789	-4.69402	2.68e-06	1.25e-05	COX7A2		ENSG00000136574	123.546	1.13187	0.305714	3.70238	0.000213587	0.000755277	GATA4
ENSG00000052850	292.447	-0.669993	0.13632	-4.91487	8.88e-07	4.41e-06	ALX4		ENSG00000172350	27.2758	1.13244	0.431658	2.62346	0.00870408	0.0220737	ABCG4
ENSG00000100714	3825.17	-0.669935	0.0446024	-15.0202	5.42e-51	3.75e-49	MTHFD1		ENSG00000139908	59.9181	1.13335	0.278822	4.06476	4.81e-05	0.000189177	TSSK4
ENSG00000125841	1680.87	-0.669825	0.0692708	-9.66966	4.06e-22	6.96e-21	NRSN2		ENSG00000260565	448.483	1.13385	0.0933869	12.1415	6.37e-34	2.06e-32	ERVK13-1
ENSG00000130669	4115.17	-0.669456	0.0645131	-10.377	3.15e-25	6.51e-24	PAK4		ENSG00000260261	130.021	1.13407	0.163305	6.94446	3.8e-12	3.22e-11	AC124944.2
ENSG00000002549	2177.54	-0.6694	0.0455038	-14.7109	5.49e-49	3.49e-47	LAP3		ENSG00000196507	31.8743	1.13421	0.369254	3.07164	0.00212888	0.00624753	TCEAL3
ENSG00000180185	1520.16	-0.668973	0.0679595	-9.84369	7.3e-23	1.32e-21	FAHD1		ENSG00000181381	62.3188	1.13463	0.237101	4.78541	1.71e-06	8.19e-06	DDX60L
ENSG00000172922	1225.07	-0.668808	0.0737605	-9.0673	1.22e-19	1.78e-18	RNASEH2C		ENSG00000197355	1238.69	1.13476	0.0785706	14.4425	2.79e-47	1.68e-45	UAP1L1
ENSG00000143344	154.901	-0.66862	0.138681	-4.82127	1.43e-06	6.91e-06	RGL1		ENSG00000279852	18.8467	1.13541	0.399413	2.84271	0.00447318	0.0122156	AC083964.2
ENSG00000109674	360.738	-0.66847	0.117923	-5.66872	1.44e-08	8.69e-08	NEIL3		ENSG00000136425	66.4681	1.13643	0.350046	3.24651	0.00116828	0.00360872	CIB2
ENSG00000188976	5344.86	-0.668251	0.03603	-18.547	8.62e-77	1.45e-74	NOC2L		ENSG00000215190	160.126	1.1376	0.147046	7.73634	1.02e-14	1.08e-13	LINC00680
ENSG00000163931	10548	-0.667775	0.056887	-11.7386	8.08e-32	2.39e-30	TKT		ENSG00000278704	70.2049	1.14077	0.24178	4.71823	2.38e-06	1.12e-05	BX004987.1
ENSG00000188735	1420.31	-0.667665	0.0697718	-9.56927	1.08e-21	1.8e-20	TMEM120B		ENSG00000282458	155.421	1.14097	0.14214	8.02709	9.98e-16	1.13e-14	WASH5P
ENSG00000146701	18039.3	-0.667351	0.0757748	-8.80703	1.29e-18	1.77e-17	MDH2		ENSG00000226913	19.7513	1.14187	0.409525	2.78828	0.00529893	0.0142026	BSN-DT
ENSG00000145736	1708.23	-0.667052	0.0571294	-11.6762	1.69e-31	4.89e-30	GTF2H2		ENSG00000270157	99.8644	1.14231	0.188607	6.05656	1.39e-09	9.33e-09	AC004918.4
ENSG00000204392	856.406	-0.666634	0.0851595	-7.82807	4.95e-15	5.34e-14	LSM2		ENSG00000251015	30.6811	1.14426	0.411713	2.77926	0.00544829	0.0145667	SLC25A30-AS1
ENSG00000112877	375.2	-0.666296	0.0900247	-7.40126	1.35e-13	1.31e-12	CEP72		ENSG00000166922	14.1686	1.14477	0.469496	2.43829	0.0147571	0.0351763	SCG5
ENSG00000111445	1397.36	-0.665714	0.0628736	-10.5881	3.38e-26	7.42e-25	RFC5		ENSG00000272941	21.4419	1.14477	0.442003	2.58996	0.00959867	0.0240621	AC083862.2
ENSG00000171793	2955.06	-0.665624	0.049341	-13.4903	1.78e-41	8.45e-40	CTPS1		ENSG00000177410	1159.43	1.14566	0.148527	7.71345	1.22e-14	1.28e-13	ZFAS1
ENSG00000114859	560.122	-0.665384	0.0740408	-8.98672	2.55e-19	3.66e-18	CLCN2		ENSG00000153558	97.6529	1.14587	0.223225	5.13323	2.85e-07	1.5e-06	FBXL2
ENSG00000204382	58.1381	-0.665208	0.286989	-2.31788	0.0204557	0.0466403	XAGE1B		ENSG00000166405	323.371	1.14692	0.0991648	11.5658	6.14e-31	1.73e-29	RIC3
ENSG00000186493	253.625	-0.664775	0.124575	-5.33636	9.48e-08	5.26e-07	C5orf38		ENSG00000225793	24.7312	1.14962	0.332935	3.453	0.000554385	0.00182934	AL080250.1
ENSG00000187642	105.08	-0.664664	0.173608	-3.82853	0.00012891	0.000472083	PERM1		ENSG00000174483	45.3995	1.15033	0.312201	3.68458	0.000229081	0.000805781	BBS1
ENSG00000092841	5770.17	-0.664495	0.0728771	-9.11802	7.65e-20	1.13e-18	MYL6		ENSG00000254399	15.437	1.15068	0.442141	2.60252	0.00925404	0.0233019	GLYATL1P4
ENSG00000172296	197.515	-0.664032	0.141878	-4.68031	2.86e-06	1.33e-05	SPTLC3		ENSG00000276952	42.38	1.1508	0.273768	4.20356	2.63e-05	0.000107323	AL121772.3
ENSG00000155792	440.62	-0.663854	0.102139	-6.4995	8.06e-11	6.1e-10	DEPTOR		ENSG00000145284	100.675	1.1513	0.273505	4.20943	2.56e-05	0.000104788	SCD5
ENSG00000254726	544.773	-0.663574	0.0849699	-7.80951	5.74e-15	6.15e-14	MEX3A		ENSG00000222012	50.9972	1.15133	0.262803	4.38097	1.18e-05	5.06e-05	AC005481.1
ENSG00000156709	3316.31	-0.663535	0.0429446	-15.451	7.43e-54	5.72e-52	AIFM1		ENSG00000200087	24.2206	1.15199	0.373614	3.08336	0.00204674	0.00602833	SNORA73B
ENSG00000087299	1423.63	-0.663246	0.0534102	-12.418	2.09e-35	7.26e-34	L2HGDH		ENSG00000180638	26.6523	1.15238	0.331497	3.4763	0.000508391	0.00169005	SLC47A2
ENSG00000181904	3286.36	-0.663228	0.0460942	-14.3885	6.11e-47	3.61e-45	C5orf24		ENSG00000204248	36.525	1.15254	0.327674	3.51732	0.000435928	0.00146704	COL11A2
ENSG00000143314	3308.22	-0.66317	0.0533002	-12.4422	1.54e-35	5.42e-34	MRPL24		ENSG00000198169	341.265	1.15301	0.117869	9.78209	1.34e-22	2.39e-21	ZNF251
ENSG00000280071	636.729	-0.662834	0.0858482	-7.72101	1.15e-14	1.21e-13	GATD3B		ENSG00000175106	109.043	1.15353	0.191219	6.03249	1.61e-09	1.08e-08	TVP23C
ENSG00000160999	311.986	-0.662778	0.129223	-5.12895	2.91e-07	1.53e-06	SH2B2		ENSG00000206077	165.937	1.15443	0.140849	8.19622	2.48e-16	2.93e-15	ZDHHC11B
ENSG00000115652	709.923	-0.662067	0.0870712	-7.60374	2.88e-14	2.94e-13	UXS1		ENSG00000253540	111.18	1.15567	0.204292	5.65697	1.54e-08	9.27e-08	FAM86HP
ENSG00000103018	2194.68	-0.66202	0.0520525	-12.7183	4.68e-37	1.76e-35	CYB5B		ENSG00000266173	102.657	1.15667	0.203037	5.69685	1.22e-08	7.4e-08	STRADA
ENSG00000259556	93.6093	-0.661944	0.246347	-2.68703	0.00720901	0.0186732	AC090971.3		ENSG00000109906	861.788	1.15727	0.151885	7.61934	2.55e-14	2.61e-13	ZBTB16
ENSG00000141696	2707.42	-0.661332	0.0481295	-13.7407	5.79e-43	2.9e-41	P3H4		ENSG00000173275	493.102	1.15727	0.10728	10.7873	3.95e-27	9.14e-26	ZNF449
ENSG00000051341	765.72	-0.660745	0.080885	-8.16894	3.11e-16	3.65e-15	POLQ		ENSG00000232457	16.0937	1.15743	0.491963	2.35269	0.0186383	0.0430573	SLC16A6P1
ENSG00000100504	2057.91	-0.66072	0.0569516	-11.6014	4.05e-31	1.15e-29	PYGL		ENSG00000277449	64.0353	1.15749	0.224352	5.15923	2.48e-07	1.31e-06	CEBPB-AS1
ENSG00000253767	77.3906	-0.660494	0.184115	-3.5874	0.000333987	0.00114373	PCDHGA8		ENSG00000279718	18.8682	1.15804	0.393948	2.93958	0.00328654	0.0092459	SNX18P12
ENSG00000104979	2347.15	-0.66047	0.072916	-9.05796	1.33e-19	1.94e-18	C19orf53		ENSG00000226803	24.2151	1.15853	0.45	2.57451	0.0100383	0.0250189	ZNF451-AS1
ENSG00000184185	99.2468	-0.660236	0.202862	-3.25461	0.00113547	0.0035204	KCNJ12		ENSG00000248405	25.9237	1.15893	0.3602	3.21747	0.00129328	0.00395617	PRR5-ARHGAP8
ENSG00000176387	520.753	-0.660091	0.0976466	-6.76	1.38e-11	1.12e-10	HSD11B2		ENSG00000134533	16.3941	1.15987	0.502285	2.30918	0.0209333	0.0475621	RERG
ENSG00000267575	178.873	-0.659915	0.129125	-5.11066	3.21e-07	1.68e-06	AC006504.5		ENSG00000183569	77.5935	1.16043	0.234031	4.95844	7.11e-07	3.57e-06	SERHL2
ENSG00000115317	664.751	-0.659833	0.0783526	-8.42132	3.72e-17	4.65e-16	HTRA2		ENSG00000188981	13.901	1.16054	0.436628	2.65795	0.00786167	0.0201782	MSANTD1
ENSG00000133863	103.485	-0.659502	0.241498	-2.73088	0.00631653	0.0166122	TEX15		ENSG00000173918	48.1164	1.16075	0.335209	3.46276	0.000534666	0.00176877	C1QTNF1
ENSG00000130748	624.83	-0.659421	0.0985864	-6.68876	2.25e-11	1.79e-10	TMEM160		ENSG00000274627	314.702	1.1612	0.11646	9.97076	2.05e-23	3.81e-22	#N/A
ENSG00000011638	543.709	-0.65934	0.0846916	-7.78518	6.96e-15	7.42e-14	TMEM159		ENSG00000187045	20.6001	1.16124	0.392766	2.95658	0.00311068	0.00879222	TMPRSS6
ENSG00000154920	459.253	-0.659123	0.0992025	-6.64422	3.05e-11	2.4e-10	EME1		ENSG00000231466	21.677	1.16254	0.357293	3.25374	0.00113896	0.00352996	AL022324.2
ENSG00000167535	742.345	-0.659019	0.0790913	-8.33238	7.92e-17	9.66e-16	CACNB3		ENSG00000245849	272.713	1.16408	0.121471	9.58317	9.41e-22	1.58e-20	RAD51-AS1
ENSG00000206337	63.2789	-0.658885	0.218151	-3.02032	0.00252505	0.00728475	HCP5		ENSG00000274827	13.832	1.16425	0.487724	2.38712	0.0169812	0.0397465	LINC01297
ENSG00000122140	2456.1	-0.658223	0.0663535	-9.91995	3.41e-23	6.28e-22	MRPS2		ENSG00000162482	19.4634	1.16623	0.426316	2.73561	0.00622652	0.0164088	AKR7A3
ENSG00000182628	1923.94	-0.657547	0.0474277	-13.8642	1.04e-43	5.43e-42	SKA2		ENSG00000104419	3804.4	1.1666	0.182243	6.40136	1.54e-10	1.13e-09	NDRG1
ENSG00000106236	225.466	-0.657144	0.136761	-4.80506	1.55e-06	7.47e-06	NPTX2		ENSG00000103888	62.2195	1.16721	0.241143	4.84033	1.3e-06	6.32e-06	CEMIP
ENSG00000172270	13575.4	-0.656732	0.043115	-15.2321	2.16e-52	1.6e-50	BSG		ENSG00000152952	1533.26	1.16722	0.186847	6.24689	4.19e-10	2.96e-09	PLOD2
ENSG00000102996	5777.83	-0.656253	0.0673009	-9.75104	1.83e-22	3.2e-21	MMP15		ENSG00000105464	92.329	1.16753	0.241513	4.83426	1.34e-06	6.51e-06	GRIN2D
ENSG00000239789	268.622	-0.655875	0.0992904	-6.60562	3.96e-11	3.08e-10	MRPS17		ENSG00000158079	1712.16	1.16867	0.057422	20.3524	4.42e-92	1.15e-89	PTPDC1
ENSG00000166477	2046.67	-0.655731	0.0457	-14.3486	1.09e-46	6.32e-45	LEO1		ENSG00000261286	29.5838	1.16885	0.367595	3.17973	0.00147413	0.00445939	ATP2C2-AS1
ENSG00000156642	1520.62	-0.65447	0.0481942	-13.5799	5.27e-42	2.56e-40	NPTN		ENSG00000266743	13.8273	1.16916	0.487065	2.40042	0.0163764	0.0384979	AC103808.6
ENSG00000039560	1224.84	-0.654258	0.0603204	-10.8464	2.07e-27	4.85e-26	RAI14		ENSG00000167995	1100.93	1.16946	0.0587294	19.9126	3.16e-88	7.32e-86	BEST1
ENSG00000146223	7334.45	-0.654247	0.027171	-24.0788	4.17e-128	2.08e-125	RPL7L1		ENSG00000171310	118.445	1.16975	0.230085	5.08401	3.7e-07	1.92e-06	CHST11
ENSG00000171130	4714.74	-0.654074	0.0665065	-9.83473	7.98e-23	1.44e-21	ATP6V0E2		ENSG00000154143	18.1276	1.17036	0.501716	2.33271	0.0196631	0.0450833	PANX3
ENSG00000175920	49.7564	-0.653712	0.250665	-2.60791	0.00910977	0.0229788	DOK7		ENSG00000232888	36.165	1.17047	0.303727	3.85371	0.000116343	0.000429092	RPS11P5
ENSG00000172164	160.339	-0.653579	0.191479	-3.41332	0.000641768	0.00209685	SNTB1		ENSG00000265972	8977.61	1.17093	0.0639246	18.3173	6.02e-75	9.34e-73	TXNIP
ENSG00000035403	5268.26	-0.653031	0.0488255	-13.3748	8.49e-41	3.86e-39	VCL		ENSG00000269688	27.3605	1.17111	0.384646	3.04465	0.00232948	0.00677613	AC008982.2
ENSG00000204209	1485.01	-0.652807	0.0617782	-10.5669	4.24e-26	9.22e-25	DAXX		ENSG00000230295	69.5974	1.17119	0.208625	5.61385	1.98e-08	1.18e-07	GTF2IP23
ENSG00000062282	807.315	-0.652655	0.0613721	-10.6344	2.06e-26	4.58e-25	DGAT2		ENSG00000228775	181.854	1.1712	0.144493	8.10564	5.25e-16	6.04e-15	WEE2-AS1
ENSG00000214114	688.845	-0.652609	0.0686535	-9.50583	1.98e-21	3.28e-20	MYCBP		ENSG00000188338	56.8966	1.17234	0.417606	2.8073	0.00499588	0.0134852	SLC38A3
ENSG00000175701	603.928	-0.652205	0.0905501	-7.2027	5.9e-13	5.42e-12	MTLN		ENSG00000229152	86.5091	1.17291	0.213209	5.50122	3.77e-08	2.19e-07	ANKRD10-IT1
ENSG00000104549	1370.35	-0.651633	0.0630336	-10.3379	4.75e-25	9.71e-24	SQLE		ENSG00000125848	51.5259	1.17312	0.379956	3.08752	0.00201833	0.00595421	FLRT3
ENSG00000004838	74.5005	-0.651476	0.190822	-3.41406	0.000640028	0.00209196	ZMYND10		ENSG00000164669	24.6701	1.1733	0.383473	3.05967	0.00221582	0.00648138	INTS4P1
ENSG00000103550	721.577	-0.651424	0.0949034	-6.86408	6.69e-12	5.56e-11	KNOP1		ENSG00000114115	52.7333	1.17363	0.480066	2.44473	0.014496	0.0346208	RBP1
ENSG00000247077	3689.25	-0.651085	0.0497013	-13.1	3.29e-39	1.37e-37	PGAM5		ENSG00000110900	33.6978	1.17372	0.374635	3.13297	0.00173046	0.00516486	TSPAN11
ENSG00000271855	36.1085	-0.650977	0.272374	-2.39001	0.0168479	0.0394595	AC073195.1		ENSG00000269069	37.7789	1.17476	0.311366	3.77291	0.000161353	0.00058136	AC007842.1
ENSG00000077312	2109.34	-0.650926	0.0828975	-7.85218	4.09e-15	4.43e-14	SNRPA		ENSG00000233822	385.985	1.17505	0.104588	11.235	2.74e-29	7.07e-28	HIST1H2BN
ENSG00000126243	465.934	-0.650921	0.150451	-4.32645	1.52e-05	6.39e-05	LRFN3		ENSG00000253692	164.088	1.17698	0.184417	6.38219	1.75e-10	1.28e-09	IGHEP1
ENSG00000116874	676.843	-0.650515	0.0692501	-9.3937	5.79e-21	9.3e-20	WARS2		ENSG00000179242	57.8049	1.17759	0.300828	3.91449	9.06e-05	0.000340431	CDH4
ENSG00000125450	1160.95	-0.650312	0.051765	-12.5628	3.38e-36	1.22e-34	NUP85		ENSG00000105928	48.6732	1.17824	0.352234	3.34505	0.000822685	0.00262896	GSDME
ENSG00000139531	999.473	-0.649846	0.0794274	-8.18164	2.8e-16	3.29e-15	SUOX		ENSG00000085514	24.6007	1.17874	0.396872	2.97007	0.00297735	0.00845038	PILRA
ENSG00000184602	1451.03	-0.649445	0.0612934	-10.5957	3.12e-26	6.85e-25	SNN		ENSG00000215769	36.1577	1.17907	0.28472	4.14117	3.46e-05	0.000138777	ARHGAP27P1-BPTFP1-KPNA2P3
ENSG00000138668	6210.54	-0.648373	0.0635582	-10.2013	1.96e-24	3.88e-23	HNRNPD		ENSG00000216866	947.356	1.17929	0.342623	3.44193	0.00057757	0.00190148	RPS2P55
ENSG00000174306	1544.69	-0.648	0.0584876	-11.0793	1.58e-28	3.93e-27	ZHX3		ENSG00000196653	116.906	1.17958	0.174209	6.77106	1.28e-11	1.04e-10	ZNF502
ENSG00000167632	743.094	-0.647245	0.0862807	-7.50162	6.3e-14	6.25e-13	TRAPPC9		ENSG00000106868	71.6112	1.17986	0.26055	4.52835	5.94e-06	2.66e-05	SUSD1
ENSG00000233276	3688.6	-0.647244	0.0634076	-10.2077	1.83e-24	3.64e-23	GPX1		ENSG00000272264	28.295	1.18006	0.421806	2.79764	0.00514768	0.0138488	AC009686.2
ENSG00000172757	13182.6	-0.64705	0.0380755	-16.9939	9.12e-65	1.06e-62	CFL1		ENSG00000160781	263.881	1.18015	0.130993	9.00928	2.07e-19	3e-18	PAQR6
ENSG00000196656	123.612	-0.646976	0.155941	-4.14886	3.34e-05	0.000134532	AC004057.1		ENSG00000033122	29.6753	1.1805	0.442217	2.66949	0.00759664	0.0195678	LRRC7
ENSG00000234664	120.315	-0.646208	0.170149	-3.79789	0.000145935	0.000530233	HMGN2P5		ENSG00000109771	74.0111	1.18088	0.225241	5.24272	1.58e-07	8.56e-07	LRP2BP
ENSG00000261685	41.7149	-0.646012	0.273717	-2.36014	0.0182679	0.0423185	#N/A		ENSG00000128590	1566.93	1.18118	0.064619	18.2791	1.21e-74	1.87e-72	DNAJB9
ENSG00000197728	6198.39	-0.645582	0.0659666	-9.78649	1.29e-22	2.29e-21	RPS26		ENSG00000162994	205.65	1.18146	0.126881	9.31152	1.26e-20	1.98e-19	CLHC1
ENSG00000111319	1757.91	-0.645579	0.0493777	-13.0743	4.62e-39	1.91e-37	SCNN1A		ENSG00000141753	116.953	1.18194	0.286454	4.12613	3.69e-05	0.000147574	IGFBP4
ENSG00000277117	41.6432	-0.645543	0.261905	-2.4648	0.013709	0.0329568	FP565260.3		ENSG00000239467	675.747	1.18199	0.086185	13.7145	8.31e-43	4.14e-41	AC007405.3
ENSG00000048991	2049.45	-0.645409	0.061638	-10.471	1.17e-25	2.48e-24	R3HDM1		ENSG00000226696	53.8685	1.18267	0.251856	4.69581	2.66e-06	1.24e-05	LENG8-AS1
ENSG00000185651	3169.5	-0.645289	0.0480293	-13.4353	3.75e-41	1.75e-39	UBE2L3		ENSG00000259429	221.012	1.18284	0.117826	10.0389	1.03e-23	1.95e-22	UBE2Q2P2
ENSG00000162522	10118.6	-0.645197	0.0732996	-8.80218	1.34e-18	1.85e-17	KIAA1522		ENSG00000198944	38.8511	1.18292	0.422257	2.80141	0.00508797	0.0136996	SOWAHA
ENSG00000173156	865.91	-0.645133	0.0752945	-8.56813	1.05e-17	1.36e-16	RHOD		ENSG00000164197	44.0139	1.18294	0.268322	4.40865	1.04e-05	4.5e-05	RNF180
ENSG00000176244	223.59	-0.64508	0.124245	-5.192	2.08e-07	1.11e-06	ACBD7		ENSG00000251676	111.055	1.18316	0.180189	6.56624	5.16e-11	3.98e-10	SNHG27
ENSG00000158710	4989.01	-0.644709	0.056282	-11.455	2.22e-30	6.1e-29	TAGLN2		ENSG00000143320	106.454	1.18356	0.305718	3.87141	0.000108207	0.000401831	CRABP2
ENSG00000134056	834.945	-0.644145	0.105147	-6.12611	9.01e-10	6.15e-09	MRPS36		ENSG00000121005	175.326	1.18363	0.291127	4.06567	4.79e-05	0.000188557	CRISPLD1
ENSG00000167461	636.267	-0.644056	0.0807825	-7.97271	1.55e-15	1.74e-14	RAB8A		ENSG00000130822	43.837	1.18385	0.312562	3.78757	0.000152131	0.000550504	PNCK
ENSG00000110880	2128.21	-0.643974	0.0520248	-12.3782	3.43e-35	1.18e-33	CORO1C		ENSG00000189398	58.644	1.18388	0.244889	4.83436	1.34e-06	6.5e-06	OR7E12P
ENSG00000066322	2286.18	-0.643894	0.0468065	-13.7565	4.66e-43	2.34e-41	ELOVL1		ENSG00000236364	24.8422	1.18424	0.425267	2.78469	0.00535781	0.0143456	AL358115.1
ENSG00000132507	12394.4	-0.643713	0.0541198	-11.8942	1.27e-32	3.86e-31	EIF5A		ENSG00000236209	20.0683	1.18443	0.393745	3.00811	0.00262878	0.00755073	AC104135.1
ENSG00000125319	181.183	-0.643653	0.156163	-4.12167	3.76e-05	0.000150274	C17orf53		ENSG00000142611	243.062	1.18451	0.127758	9.27154	1.83e-20	2.86e-19	PRDM16
ENSG00000136237	249.599	-0.643218	0.130031	-4.94665	7.55e-07	3.78e-06	RAPGEF5		ENSG00000279611	25.5593	1.18464	0.371193	3.19142	0.00141573	0.0043003	AC012313.10
ENSG00000111665	885.001	-0.642632	0.0764524	-8.40564	4.26e-17	5.29e-16	CDCA3		ENSG00000175309	2204.91	1.18484	0.0599072	19.7778	4.62e-87	9.98e-85	PHYKPL
ENSG00000115053	18989.1	-0.642582	0.0340079	-18.8951	1.25e-79	2.35e-77	NCL		ENSG00000225855	135.241	1.18539	0.167857	7.06193	1.64e-12	1.45e-11	RUSC1-AS1
ENSG00000132746	435.959	-0.642543	0.0984825	-6.52444	6.83e-11	5.2e-10	ALDH3B2		ENSG00000225411	13.8016	1.18588	0.506536	2.34116	0.0192241	0.0442175	CR786580.1
ENSG00000100092	318.546	-0.642258	0.106557	-6.02734	1.67e-09	1.11e-08	SH3BP1		ENSG00000279278	41.3968	1.18669	0.278991	4.25349	2.1e-05	8.71e-05	AC245060.6
ENSG00000164647	3890.79	-0.64177	0.0513021	-12.5096	6.61e-36	2.37e-34	STEAP1		ENSG00000095539	78.7986	1.18701	0.252176	4.70706	2.51e-06	1.18e-05	SEMA4G
ENSG00000164070	1451.28	-0.641674	0.0550188	-11.6628	1.97e-31	5.69e-30	HSPA4L		ENSG00000160117	18.1991	1.18718	0.46632	2.54585	0.0109011	0.0268824	ANKLE1
ENSG00000181029	97.7653	-0.641593	0.182771	-3.51036	0.000447505	0.00150252	TRAPPC5		ENSG00000157578	201.221	1.18733	0.144377	8.22384	1.97e-16	2.34e-15	LCA5L
ENSG00000146143	496.57	-0.641564	0.0828956	-7.73942	9.99e-15	1.05e-13	PRIM2		ENSG00000214331	96.1169	1.18813	0.223667	5.31205	1.08e-07	5.98e-07	AC009053.1
ENSG00000121680	1129.43	-0.641262	0.0603744	-10.6214	2.37e-26	5.24e-25	PEX16		ENSG00000279636	30.9411	1.18839	0.313296	3.7932	0.000148719	0.000538988	AL132989.2
ENSG00000172115	10425.4	-0.641174	0.0582688	-11.0037	3.67e-28	8.95e-27	CYCS		ENSG00000100097	26.3215	1.18922	0.423567	2.80762	0.00499089	0.0134732	LGALS1
ENSG00000175792	4726.14	-0.641004	0.0401834	-15.952	2.76e-57	2.44e-55	RUVBL1		ENSG00000057704	147.662	1.19028	0.276576	4.30362	1.68e-05	7.05e-05	TMCC3
ENSG00000198911	7897.4	-0.640712	0.0564336	-11.3534	7.14e-30	1.89e-28	SREBF2		ENSG00000115844	623.694	1.19074	0.140246	8.49032	2.06e-17	2.62e-16	DLX2
ENSG00000183474	1175.46	-0.640498	0.0576863	-11.1031	1.21e-28	3.03e-27	GTF2H2C		ENSG00000227775	140.275	1.19227	0.167002	7.13925	9.38e-13	8.46e-12	AL031282.1
ENSG00000142657	4535.29	-0.639982	0.0383361	-16.694	1.45e-62	1.51e-60	PGD		ENSG00000262766	22.9386	1.19243	0.385814	3.09067	0.00199705	0.00589806	AC135050.5
ENSG00000121060	2275.76	-0.639966	0.0533229	-12.0017	3.48e-33	1.09e-31	TRIM25		ENSG00000258682	28.3385	1.19253	0.346464	3.44199	0.000577452	0.00190134	AL132989.1
ENSG00000133056	1588.91	-0.639882	0.0617055	-10.3699	3.4e-25	7e-24	PIK3C2B		ENSG00000075891	23.2075	1.19397	0.430555	2.7731	0.00555252	0.0148103	PAX2
ENSG00000117592	8541.76	-0.639453	0.0367213	-17.4137	6.5e-68	8.38e-66	PRDX6		ENSG00000105750	30.275	1.19438	0.363044	3.28989	0.00100227	0.0031458	ZNF85
ENSG00000197696	281.96	-0.639403	0.114641	-5.57743	2.44e-08	1.44e-07	NMB		ENSG00000230358	25.3559	1.19438	0.375583	3.18006	0.00147245	0.00445483	SPDYE21P
ENSG00000174705	855.911	-0.638723	0.0812409	-7.86209	3.78e-15	4.11e-14	SH3PXD2B		ENSG00000233429	148.398	1.19556	0.183126	6.52861	6.64e-11	5.06e-10	HOTAIRM1
ENSG00000174953	2380.54	-0.63857	0.0547103	-11.6718	1.78e-31	5.13e-30	DHX36		ENSG00000063438	397.24	1.19586	0.153755	7.77768	7.39e-15	7.86e-14	AHRR
ENSG00000101444	10581.7	-0.638495	0.0575876	-11.0874	1.44e-28	3.6e-27	AHCY		ENSG00000279953	13.1771	1.19644	0.499863	2.39355	0.0166864	0.0391379	AC117503.3
ENSG00000118894	499.579	-0.638261	0.0779005	-8.19329	2.54e-16	3e-15	EEF2KMT		ENSG00000266852	21.4971	1.19648	0.362125	3.30406	0.000952957	0.00300267	MIR4482
ENSG00000067064	1858.79	-0.637758	0.0654523	-9.74386	1.96e-22	3.43e-21	IDI1		ENSG00000196267	36.1552	1.19813	0.304883	3.9298	8.5e-05	0.000321237	ZNF836
ENSG00000229638	41.661	-0.637705	0.272326	-2.3417	0.0191963	0.0441731	RPL4P4		ENSG00000188659	30.8792	1.19843	0.39885	3.0047	0.00265841	0.00762703	SAXO2
ENSG00000128578	359.044	-0.63764	0.0879806	-7.2475	4.25e-13	3.95e-12	STRIP2		ENSG00000229956	37.9495	1.1988	0.311906	3.84345	0.000121316	0.000446228	ZRANB2-AS2
ENSG00000176087	3491.32	-0.637549	0.0663824	-9.60419	7.68e-22	1.3e-20	SLC35A4		ENSG00000176165	330	1.19891	0.188981	6.34408	2.24e-10	1.62e-09	FOXG1
ENSG00000114738	1929.88	-0.637068	0.0500241	-12.7352	3.77e-37	1.43e-35	MAPKAPK3		ENSG00000147041	51.9532	1.2018	0.253755	4.73606	2.18e-06	1.03e-05	SYTL5
ENSG00000075702	491.562	-0.636701	0.111677	-5.70129	1.19e-08	7.22e-08	WDR62		ENSG00000134871	806.477	1.20187	0.105998	11.3386	8.44e-30	2.23e-28	COL4A2
ENSG00000108773	2738.37	-0.636552	0.0712875	-8.92936	4.28e-19	6.08e-18	KAT2A		ENSG00000160161	96.2932	1.20198	0.30664	3.91982	8.86e-05	0.000333561	CILP2
ENSG00000179218	19250.5	-0.63647	0.0479332	-13.2783	3.09e-40	1.37e-38	CALR		ENSG00000165121	180.973	1.20231	0.16122	7.45758	8.81e-14	8.65e-13	AL353743.1
ENSG00000117399	2576.69	-0.636361	0.0761174	-8.36025	6.26e-17	7.67e-16	CDC20		ENSG00000135541	528.215	1.20285	0.104893	11.4674	1.92e-30	5.3e-29	AHI1
ENSG00000064787	95.8537	-0.636272	0.180338	-3.52822	0.000418364	0.00141178	BCAS1		ENSG00000130477	75.0463	1.20418	0.260742	4.61828	3.87e-06	1.77e-05	UNC13A
ENSG00000115268	18406.3	-0.636162	0.0678234	-9.37969	6.62e-21	1.06e-19	RPS15		ENSG00000270060	34.83	1.2045	0.339286	3.5501	0.000385082	0.0013061	AC090589.3
ENSG00000175130	8740.37	-0.635284	0.0400614	-15.8578	1.24e-56	1.08e-54	MARCKSL1		ENSG00000166888	204.183	1.20502	0.196628	6.12841	8.88e-10	6.07e-09	STAT6
ENSG00000114737	75.2353	-0.635128	0.204796	-3.10128	0.00192688	0.00570253	CISH		ENSG00000257052	13.3793	1.20549	0.512184	2.35363	0.0185911	0.042956	AP003721.4
ENSG00000272841	68.8591	-0.634819	0.228914	-2.77318	0.00555112	0.0148081	AL139393.3		ENSG00000246575	63.1313	1.20561	0.251494	4.7938	1.64e-06	7.87e-06	AC093162.2
ENSG00000184232	655.843	-0.634701	0.086544	-7.33386	2.24e-13	2.13e-12	OAF		ENSG00000248126	17.4337	1.20593	0.515309	2.3402	0.0192734	0.0443229	AC091849.1
ENSG00000275993	132.662	-0.6341	0.181278	-3.49794	0.00046886	0.0015687	SIK1B		ENSG00000274925	84.6418	1.20771	0.220273	5.48281	4.19e-08	2.42e-07	ZKSCAN2-DT
ENSG00000101898	118.174	-0.63407	0.158828	-3.99218	6.55e-05	0.000252414	MCTS2P		ENSG00000261469	22.2025	1.20775	0.382995	3.15345	0.00161354	0.00484942	AC020978.4
ENSG00000164211	622.694	-0.633883	0.0898726	-7.05312	1.75e-12	1.54e-11	STARD4		ENSG00000266993	19.48	1.2081	0.398221	3.03374	0.00241542	0.00699415	AL050343.2
ENSG00000119333	2049.01	-0.63385	0.0527706	-12.0114	3.09e-33	9.7e-32	WDR34		ENSG00000107242	22.2311	1.20851	0.410489	2.94407	0.00323924	0.00912076	PIP5K1B
ENSG00000234753	102.077	-0.633725	0.170823	-3.70984	0.000207387	0.000734958	FOXP4-AS1		ENSG00000270069	63.1989	1.20908	0.241504	5.00647	5.54e-07	2.82e-06	MIR222HG
ENSG00000198406	39.0643	-0.633044	0.267752	-2.3643	0.0180644	0.0419296	BZW1P2		ENSG00000230445	9.18016	1.20927	0.518809	2.33086	0.0197606	0.0452666	LRRC37A6P
ENSG00000112984	1423.46	-0.632621	0.0981674	-6.44431	1.16e-10	8.65e-10	KIF20A		ENSG00000145075	83.4035	1.2095	0.206752	5.85001	4.92e-09	3.12e-08	CCDC39
ENSG00000160957	1493.85	-0.632206	0.0528707	-11.9576	5.93e-33	1.82e-31	RECQL4		ENSG00000233765	16.1209	1.20977	0.439395	2.75326	0.00590055	0.0156293	AL591479.1
ENSG00000105364	1954.63	-0.632106	0.0568166	-11.1254	9.44e-29	2.37e-27	MRPL4		ENSG00000160201	178.335	1.21032	0.169473	7.14166	9.22e-13	8.31e-12	U2AF1
ENSG00000140740	7228.54	-0.632087	0.0431823	-14.6376	1.62e-48	1.01e-46	UQCRC2		ENSG00000078399	241.191	1.21121	0.286306	4.23046	2.33e-05	9.6e-05	HOXA9
ENSG00000132383	4915.35	-0.631572	0.03655	-17.2797	6.69e-67	8.42e-65	RPA1		ENSG00000265982	18.8264	1.21121	0.386185	3.13636	0.0017106	0.00511267	AC103810.3
ENSG00000095587	58.4528	-0.631562	0.242796	-2.60121	0.00928963	0.0233759	TLL2		ENSG00000253309	16.9899	1.21305	0.406627	2.98321	0.00285244	0.0081288	SERPINE3
ENSG00000223572	605.879	-0.631282	0.0774884	-8.14679	3.74e-16	4.35e-15	CKMT1A		ENSG00000231628	15.0353	1.21327	0.504631	2.40427	0.0162047	0.038146	AL133406.2
ENSG00000178105	1044.99	-0.63126	0.068331	-9.23826	2.51e-20	3.85e-19	DDX10		ENSG00000242588	86.3585	1.21375	0.229919	5.27902	1.3e-07	7.1e-07	AC108010.1
ENSG00000188095	123.612	-0.63121	0.174268	-3.62207	0.00029226	0.00101086	MESP2		ENSG00000204623	272.837	1.21393	0.134172	9.04751	1.46e-19	2.13e-18	ZNRD1ASP
ENSG00000135185	604.806	-0.631192	0.0738244	-8.54991	1.23e-17	1.59e-16	TMEM243		ENSG00000278662	154.874	1.21399	0.165955	7.31515	2.57e-13	2.44e-12	GOLGA6L10
ENSG00000196247	1054.13	-0.630876	0.0623966	-10.1107	4.95e-24	9.59e-23	ZNF107		ENSG00000272010	21.0651	1.21433	0.425132	2.85636	0.0042853	0.0117533	AC100814.1
ENSG00000101347	1756.73	-0.630465	0.0450731	-13.9876	1.86e-44	9.96e-43	SAMHD1		ENSG00000241484	96.967	1.21456	0.207102	5.86453	4.5e-09	2.87e-08	ARHGAP8
ENSG00000130204	3135.94	-0.630449	0.0629975	-10.0075	1.41e-23	2.65e-22	TOMM40		ENSG00000248213	60.6223	1.21509	0.254405	4.77621	1.79e-06	8.55e-06	CICP16
ENSG00000173409	621.533	-0.630374	0.0882081	-7.14644	8.91e-13	8.04e-12	ARV1		ENSG00000209482	14.1306	1.21512	0.52694	2.30599	0.0211113	0.0479077	SNORD83A
ENSG00000134333	12618	-0.630331	0.160029	-3.93885	8.19e-05	0.000310079	LDHA		ENSG00000254206	35.8323	1.21538	0.328208	3.70308	0.000212999	0.000753406	NPIPB11
ENSG00000221916	66.8591	-0.6301	0.200904	-3.13632	0.00171083	0.00511273	C19orf73		ENSG00000188227	52.2658	1.21599	0.323821	3.75514	0.000173247	0.000621363	ZNF793
ENSG00000172340	3246.99	-0.629985	0.0350615	-17.968	3.47e-72	4.94e-70	SUCLG2		ENSG00000159450	17.17	1.21617	0.508998	2.38934	0.0168785	0.0395276	TCHH
ENSG00000008441	17394.6	-0.629651	0.0658339	-9.56422	1.13e-21	1.89e-20	NFIX		ENSG00000214733	20.3373	1.21661	0.421206	2.8884	0.00387206	0.0107415	#N/A
ENSG00000143153	6764.13	-0.629631	0.0297731	-21.1477	2.9e-99	9.39e-97	ATP1B1		ENSG00000228626	22.079	1.21842	0.387361	3.14544	0.00165837	0.00497319	AC245100.3
ENSG00000130590	355.02	-0.629541	0.104762	-6.00923	1.86e-09	1.23e-08	SAMD10		ENSG00000163082	43.4223	1.21849	0.333343	3.65537	0.000256816	0.000897246	SGPP2
ENSG00000231925	2224.93	-0.62936	0.0635415	-9.9047	3.97e-23	7.27e-22	TAPBP		ENSG00000164061	210.223	1.22109	0.180237	6.77489	1.24e-11	1.01e-10	BSN
ENSG00000176383	91.1306	-0.629327	0.214655	-2.9318	0.00337001	0.00946225	B3GNT4		ENSG00000282206	20.4895	1.22115	0.404669	3.01764	0.00254748	0.00734536	AC233280.19
ENSG00000163002	367.271	-0.629253	0.108461	-5.80165	6.57e-09	4.1e-08	NUP35		ENSG00000227888	15.7032	1.22232	0.459683	2.65905	0.00783602	0.0201204	FAM66A
ENSG00000132002	2383.88	-0.628978	0.0588843	-10.6816	1.24e-26	2.8e-25	DNAJB1		ENSG00000226057	355.148	1.22306	0.103466	11.8209	3.05e-32	9.12e-31	PHF2P2
ENSG00000163686	519.057	-0.62867	0.0985832	-6.37705	1.81e-10	1.32e-09	ABHD6		ENSG00000168994	87.4881	1.22349	0.241698	5.06206	4.15e-07	2.14e-06	PXDC1
ENSG00000129667	537.466	-0.628568	0.0998413	-6.29567	3.06e-10	2.19e-09	RHBDF2		ENSG00000272669	28.8274	1.22369	0.381936	3.2039	0.00135577	0.00413222	AL021707.6
ENSG00000100749	815.531	-0.628521	0.0857427	-7.33031	2.3e-13	2.19e-12	VRK1		ENSG00000135976	167.922	1.22563	0.177133	6.91925	4.54e-12	3.81e-11	ANKRD36
ENSG00000107815	913.587	-0.628164	0.0765967	-8.20092	2.39e-16	2.82e-15	TWNK		ENSG00000256443	11.9281	1.22644	0.49444	2.48045	0.0131215	0.0317239	AP003559.1
ENSG00000100591	3258.47	-0.627995	0.0540698	-11.6145	3.48e-31	9.9e-30	AHSA1		ENSG00000227001	16.7365	1.22653	0.468144	2.61999	0.00879333	0.0222608	NBPF2P
ENSG00000159167	145.672	-0.627174	0.224698	-2.79118	0.00525157	0.0140917	STC1		ENSG00000242338	28.8127	1.22836	0.369881	3.32096	0.000897075	0.0028411	BMS1P4
ENSG00000161860	56.1033	-0.626986	0.242305	-2.58759	0.00966509	0.0242122	SYCE2		ENSG00000244627	123.692	1.22942	0.191223	6.42922	1.28e-10	9.52e-10	TPTEP2
ENSG00000168615	5587.09	-0.62689	0.0418803	-14.9686	1.18e-50	8.03e-49	ADAM9		ENSG00000042493	164.786	1.22992	0.187229	6.56907	5.06e-11	3.91e-10	CAPG
ENSG00000084092	1428.83	-0.626728	0.0592695	-10.5742	3.93e-26	8.55e-25	NOA1		ENSG00000229375	50.6415	1.23031	0.24259	5.07157	3.95e-07	2.04e-06	USP24P1
ENSG00000112149	126.887	-0.626706	0.184924	-3.389	0.000701477	0.00227132	CD83		ENSG00000170837	326.41	1.23042	0.205607	5.98431	2.17e-09	1.43e-08	GPR27
ENSG00000187566	69.6947	-0.62669	0.198429	-3.15826	0.00158712	0.00477333	NHLRC1		ENSG00000250033	43.2539	1.23073	0.312726	3.93548	8.3e-05	0.000314191	SLC7A11-AS1
ENSG00000105376	462.469	-0.626549	0.0870223	-7.19987	6.03e-13	5.53e-12	ICAM5		ENSG00000278864	103.31	1.23089	0.179297	6.86509	6.64e-12	5.52e-11	AC055811.4
ENSG00000172031	99.8057	-0.626526	0.190877	-3.28235	0.00102947	0.00322087	EPHX4		ENSG00000174788	48.3481	1.23099	0.256223	4.80438	1.55e-06	7.49e-06	PCP2
ENSG00000136267	310.439	-0.626496	0.108131	-5.79388	6.88e-09	4.28e-08	DGKB		ENSG00000282988	91.765	1.23231	0.203388	6.0589	1.37e-09	9.2e-09	AL031777.3
ENSG00000165271	2201.12	-0.626417	0.0516346	-12.1317	7.17e-34	2.32e-32	NOL6		ENSG00000214176	471.116	1.23266	0.101329	12.165	4.78e-34	1.56e-32	PLEKHM1P1
ENSG00000182512	3088.97	-0.626392	0.115028	-5.44556	5.16e-08	2.95e-07	GLRX5		ENSG00000185739	14.196	1.23368	0.520961	2.36808	0.0178806	0.0415589	SRL
ENSG00000123297	1044.44	-0.626352	0.0577347	-10.8488	2.02e-27	4.74e-26	TSFM		ENSG00000128203	56.906	1.23445	0.328496	3.75787	0.000171364	0.000615121	ASPHD2
ENSG00000240849	952.785	-0.625717	0.06107	-10.2459	1.23e-24	2.48e-23	TMEM189		ENSG00000229413	43.5896	1.23531	0.281504	4.38825	1.14e-05	4.91e-05	AC018638.1
ENSG00000197256	930.707	-0.625596	0.0681417	-9.18081	4.28e-20	6.45e-19	KANK2		ENSG00000173175	28.582	1.23545	0.382645	3.22871	0.00124351	0.003817	ADCY5
ENSG00000112578	1081.53	-0.625475	0.0630443	-9.92119	3.37e-23	6.21e-22	BYSL		ENSG00000175463	252.54	1.23705	0.121808	10.1558	3.12e-24	6.11e-23	TBC1D10C
ENSG00000162949	108.164	-0.625309	0.162226	-3.85455	0.000115942	0.000427734	CAPN13		ENSG00000277020	11.1709	1.23725	0.533898	2.31739	0.0204827	0.0466937	AL590096.1
ENSG00000103769	3976.41	-0.62516	0.0445691	-14.0268	1.07e-44	5.82e-43	RAB11A		ENSG00000106948	2648	1.23755	0.0530281	23.3377	1.84e-120	8.08e-118	AKNA
ENSG00000106683	3015.67	-0.624974	0.0642059	-9.7339	2.16e-22	3.77e-21	LIMK1		ENSG00000259343	43.5291	1.23823	0.268459	4.61236	3.98e-06	1.82e-05	TMC3-AS1
ENSG00000101346	3656.17	-0.624916	0.0493256	-12.6692	8.76e-37	3.28e-35	POFUT1		ENSG00000108798	34.9309	1.23883	0.297738	4.16079	3.17e-05	0.000128109	ABI3
ENSG00000198176	2888.02	-0.624779	0.0474128	-13.1774	1.18e-39	5.09e-38	TFDP1		ENSG00000173698	32.7723	1.23968	0.42215	2.93658	0.00331857	0.00932893	ADGRG2
ENSG00000115419	2649.6	-0.624738	0.0438472	-14.2481	4.61e-46	2.61e-44	GLS		ENSG00000223802	39.4132	1.23968	0.475843	2.60524	0.00918107	0.0231361	CERS1
ENSG00000109107	1450.94	-0.624685	0.22707	-2.75107	0.00594001	0.0157273	ALDOC		ENSG00000169031	25.3814	1.24047	0.35519	3.49242	0.000478672	0.00159925	COL4A3
ENSG00000176182	260.756	-0.624497	0.109266	-5.7154	1.09e-08	6.67e-08	MYPOP		ENSG00000170965	101.033	1.24048	0.228824	5.42111	5.92e-08	3.37e-07	PLAC1
ENSG00000270959	233.793	-0.624495	0.124039	-5.03466	4.79e-07	2.45e-06	LPP-AS2		ENSG00000272034	22.6516	1.24067	0.403343	3.07598	0.00209811	0.00616561	SNORD14A
ENSG00000162104	1382.19	-0.624413	0.0564599	-11.0594	1.97e-28	4.89e-27	ADCY9		ENSG00000279696	20.4481	1.241	0.434156	2.85842	0.00425761	0.0116835	AP001273.1
ENSG00000135925	76.4093	-0.624176	0.176108	-3.54428	0.000393682	0.00133387	WNT10A		ENSG00000240875	61.7949	1.24201	0.273334	4.54394	5.52e-06	2.48e-05	LINC00886
ENSG00000188157	5358.77	-0.623787	0.0694631	-8.98012	2.7e-19	3.88e-18	AGRN		ENSG00000279452	31.4711	1.2425	0.355197	3.49805	0.00046867	0.00156833	AC006277.1
ENSG00000119541	1179.06	-0.623743	0.0618419	-10.0861	6.36e-24	1.23e-22	VPS4B		ENSG00000235703	64.7777	1.24589	0.320056	3.89274	9.91e-05	0.000370417	LINC00894
ENSG00000161981	1231.4	-0.623686	0.0803954	-7.75773	8.65e-15	9.13e-14	SNRNP25		ENSG00000279048	35.4119	1.2459	0.333661	3.73404	0.000188429	0.000671909	AC080080.1
ENSG00000173456	1690.52	-0.623401	0.0671552	-9.28299	1.65e-20	2.58e-19	RNF26		ENSG00000263968	23.1711	1.24676	0.383501	3.251	0.00115	0.00355826	RN7SL381P
ENSG00000081803	301.162	-0.623322	0.11773	-5.29453	1.19e-07	6.55e-07	CADPS2		ENSG00000149591	210.875	1.24687	0.131776	9.46206	3.02e-21	4.93e-20	TAGLN
ENSG00000120647	381.82	-0.623289	0.0961101	-6.48516	8.86e-11	6.69e-10	CCDC77		ENSG00000198156	38.2322	1.2471	0.318813	3.9117	9.17e-05	0.000344194	NPIPB6
ENSG00000167815	6446.67	-0.62326	0.0739479	-8.42836	3.51e-17	4.39e-16	PRDX2		ENSG00000167552	373.409	1.24757	0.175586	7.10519	1.2e-12	1.07e-11	TUBA1A
ENSG00000128928	7602.45	-0.623072	0.0400552	-15.5553	1.46e-54	1.16e-52	IVD		ENSG00000278991	23.6858	1.24873	0.35564	3.51123	0.000446036	0.00149794	AC090181.3
ENSG00000166840	809.944	-0.62286	0.0877928	-7.09466	1.3e-12	1.15e-11	GLYATL1		ENSG00000260953	37.6889	1.24882	0.326073	3.82989	0.000128201	0.000469685	AC009093.4
ENSG00000140807	181.296	-0.622837	0.134593	-4.62756	3.7e-06	1.7e-05	NKD1		ENSG00000260949	38.9138	1.24909	0.296798	4.20856	2.57e-05	0.000105144	AP006545.1
ENSG00000138623	79.2633	-0.622809	0.236284	-2.63585	0.00839268	0.0213718	SEMA7A		ENSG00000226330	15.9315	1.25143	0.496991	2.51801	0.0118019	0.0288511	AL606489.1
ENSG00000169220	954.232	-0.622593	0.0755262	-8.24341	1.67e-16	2e-15	RGS14		ENSG00000270093	175.862	1.25189	0.18275	6.8503	7.37e-12	6.11e-11	#N/A
ENSG00000118655	627.888	-0.622562	0.075249	-8.27336	1.3e-16	1.57e-15	DCLRE1B		ENSG00000081665	63.5799	1.25352	0.241	5.2013	1.98e-07	1.06e-06	ZNF506
ENSG00000124207	5895.72	-0.622405	0.05201	-11.967	5.29e-33	1.63e-31	CSE1L		ENSG00000203875	1826.5	1.25508	0.110036	11.4061	3.9e-30	1.05e-28	SNHG5
ENSG00000176720	1051.43	-0.62229	0.0923504	-6.73836	1.6e-11	1.29e-10	BOK		ENSG00000205890	95.2119	1.25525	0.224124	5.60072	2.13e-08	1.27e-07	AC108134.1
ENSG00000189064	85.4556	-0.622056	0.239823	-2.59382	0.00949172	0.0238171	GAGE2A		ENSG00000279382	194.642	1.25549	0.137366	9.13976	6.26e-20	9.38e-19	AC018665.1
ENSG00000204379	51.484	-0.621606	0.234153	-2.6547	0.00793795	0.0203619	XAGE1A		ENSG00000276231	21.8709	1.2557	0.382358	3.28409	0.00102313	0.00320546	PIK3R6
ENSG00000122642	1685.78	-0.62154	0.0625985	-9.92899	3.11e-23	5.74e-22	FKBP9		ENSG00000130508	498.301	1.25594	0.127277	9.8678	5.74e-23	1.04e-21	PXDN
ENSG00000182557	33.1388	-0.621198	0.251731	-2.46771	0.0135981	0.0327357	SPNS3		ENSG00000165555	29.3626	1.25654	0.377087	3.33222	0.00086157	0.00274004	NOXRED1
ENSG00000123600	778.56	-0.621034	0.071227	-8.71909	2.8e-18	3.78e-17	METTL8		ENSG00000253636	35.3873	1.25681	0.303861	4.13614	3.53e-05	0.000141592	AC022893.1
ENSG00000114450	1344.08	-0.620613	0.0697173	-8.90185	5.49e-19	7.74e-18	GNB4		ENSG00000214212	59.7986	1.25852	0.328196	3.83465	0.000125741	0.000461258	C19orf38
ENSG00000146950	1048.71	-0.620537	0.0806316	-7.69596	1.4e-14	1.46e-13	SHROOM2		ENSG00000169314	22.679	1.26059	0.375231	3.35951	0.000780821	0.00250382	C22orf15
ENSG00000103642	893.679	-0.620276	0.0634668	-9.77325	1.47e-22	2.6e-21	LACTB		ENSG00000164764	28.1425	1.26168	0.350864	3.59591	0.000323263	0.00110935	SBSPON
ENSG00000111737	2611.86	-0.620233	0.0376878	-16.4571	7.45e-61	7.32e-59	RAB35		ENSG00000189410	29.471	1.26178	0.527613	2.39149	0.0167801	0.0393221	SH2D5
ENSG00000146263	754.959	-0.620109	0.0765249	-8.10337	5.35e-16	6.15e-15	MMS22L		ENSG00000198300	14.9506	1.26184	0.49925	2.52747	0.0114887	0.0281599	PEG3
ENSG00000163584	6823.8	-0.619741	0.0711877	-8.70574	3.16e-18	4.24e-17	RPL22L1		ENSG00000138109	197.806	1.26189	0.138032	9.14205	6.13e-20	9.19e-19	CYP2C9
ENSG00000196950	860.859	-0.61889	0.0675215	-9.16582	4.92e-20	7.4e-19	SLC39A10		ENSG00000232859	166.055	1.26214	0.169718	7.4367	1.03e-13	1.01e-12	LYRM9
ENSG00000233903	62.7977	-0.618544	0.24797	-2.49443	0.0126158	0.0306328	#N/A		ENSG00000178038	575.957	1.26224	0.103504	12.1951	3.3e-34	1.09e-32	ALS2CL
ENSG00000229891	82.7627	-0.61839	0.18693	-3.30813	0.000939201	0.00296437	LINC01315		ENSG00000268670	35.1712	1.26249	0.323187	3.90638	9.37e-05	0.000351444	AC016586.1
ENSG00000186416	680.832	-0.618313	0.0834228	-7.4118	1.25e-13	1.21e-12	NKRF		ENSG00000133083	41.1639	1.26336	0.491602	2.56988	0.0101734	0.0253147	DCLK1
ENSG00000255042	155.386	-0.618271	0.136486	-4.52993	5.9e-06	2.64e-05	AC109635.3		ENSG00000237950	27.5757	1.26404	0.371908	3.39879	0.000676852	0.00220038	AL357079.1
ENSG00000177706	81.6199	-0.618224	0.205996	-3.00115	0.00268963	0.00770723	FAM20C		ENSG00000168970	154.379	1.26469	0.179876	7.03089	2.05e-12	1.79e-11	JMJD7-PLA2G4B
ENSG00000139131	1124.87	-0.618125	0.0582827	-10.6056	2.81e-26	6.18e-25	YARS2		ENSG00000279500	31.6616	1.26469	0.363577	3.47847	0.000504276	0.00167766	AC108704.2
ENSG00000053372	1173.19	-0.618114	0.0657837	-9.39616	5.66e-21	9.09e-20	MRTO4		ENSG00000103742	139.727	1.26506	0.262738	4.81493	1.47e-06	7.12e-06	IGDCC4
ENSG00000175906	248.763	-0.618097	0.122933	-5.0279	4.96e-07	2.53e-06	ARL4D		ENSG00000134245	64.6906	1.26521	0.278405	4.5445	5.51e-06	2.47e-05	WNT2B
ENSG00000247134	213.498	-0.618058	0.123388	-5.00907	5.47e-07	2.78e-06	AC090204.1		ENSG00000119714	21.021	1.26606	0.431741	2.93246	0.00336292	0.0094454	GPR68
ENSG00000163814	1318.71	-0.617897	0.0694787	-8.89333	5.93e-19	8.33e-18	CDCP1		ENSG00000178852	36.9375	1.26646	0.352404	3.59376	0.000325944	0.00111766	EFCAB13
ENSG00000158042	1994.43	-0.617866	0.0485683	-12.7216	4.49e-37	1.69e-35	MRPL17		ENSG00000273387	16.9955	1.2692	0.463015	2.74117	0.00612212	0.016155	AC005005.3
ENSG00000111077	2161.22	-0.617744	0.0749246	-8.24487	1.65e-16	1.98e-15	TNS2		ENSG00000241370	28.3294	1.26975	0.373431	3.40024	0.00067327	0.00218957	RPP21
ENSG00000141873	1222.52	-0.617333	0.0717119	-8.60852	7.4e-18	9.72e-17	SLC39A3		ENSG00000174514	160.312	1.2706	0.164142	7.74085	9.88e-15	1.04e-13	MFSD4A
ENSG00000170027	14356.5	-0.617111	0.0336801	-18.3227	5.45e-75	8.51e-73	YWHAG		ENSG00000274020	63.7528	1.27082	0.205099	6.19611	5.79e-10	4.03e-09	LINC01138
ENSG00000162144	1250.86	-0.616934	0.0535288	-11.5253	9.84e-31	2.75e-29	CYB561A3		ENSG00000253369	37.5259	1.2715	0.283233	4.48923	7.15e-06	3.17e-05	AC022034.3
ENSG00000171503	1825.13	-0.616606	0.0470614	-13.1022	3.2e-39	1.33e-37	ETFDH		ENSG00000078114	3009.97	1.27186	0.0521233	24.401	1.67e-131	8.66e-129	NEBL
ENSG00000011677	225.492	-0.616389	0.110913	-5.55742	2.74e-08	1.61e-07	GABRA3		ENSG00000054983	209.035	1.27248	0.127069	10.0141	1.32e-23	2.49e-22	GALC
ENSG00000254986	2001.78	-0.616182	0.0547616	-11.2521	2.26e-29	5.85e-28	DPP3		ENSG00000164867	116.224	1.27313	0.1881	6.7684	1.3e-11	1.06e-10	NOS3
ENSG00000150753	7670.7	-0.616066	0.0373975	-16.4735	5.69e-61	5.61e-59	CCT5		ENSG00000272645	718.445	1.27332	0.0878069	14.5014	1.19e-47	7.21e-46	GTF2IP20
ENSG00000181544	155.504	-0.616041	0.156612	-3.93356	8.37e-05	0.000316532	FANCB		ENSG00000110025	41.7936	1.27442	0.304014	4.19198	2.77e-05	0.000112491	SNX15
ENSG00000143476	1089.45	-0.615814	0.085855	-7.17272	7.35e-13	6.69e-12	DTL		ENSG00000167460	1237.64	1.27581	0.0819953	15.5596	1.37e-54	1.1e-52	TPM4
ENSG00000175279	96.6352	-0.615626	0.204412	-3.01168	0.00259804	0.00747202	CENPS		ENSG00000118263	186.247	1.27625	0.15284	8.35021	6.81e-17	8.33e-16	KLF7
ENSG00000171700	438.501	-0.615152	0.0889302	-6.91725	4.61e-12	3.86e-11	RGS19		ENSG00000258441	381.285	1.27646	0.102864	12.4092	2.33e-35	8.08e-34	LINC00641
ENSG00000103415	1414.69	-0.615	0.0577997	-10.6402	1.94e-26	4.32e-25	HMOX2		ENSG00000173209	762.159	1.27649	0.094525	13.5043	1.47e-41	7.01e-40	AHSA2P
ENSG00000070614	3790.76	-0.614994	0.0587475	-10.4684	1.21e-25	2.55e-24	NDST1		ENSG00000096696	3865.2	1.27721	0.0541283	23.596	4.23e-123	1.99e-120	DSP
ENSG00000112787	3016.11	-0.614422	0.0842567	-7.29227	3.05e-13	2.87e-12	FBRSL1		ENSG00000167945	11.4343	1.27746	0.546666	2.33683	0.0194482	0.0446694	#N/A
ENSG00000227500	3640.37	-0.614317	0.0722901	-8.49794	1.93e-17	2.46e-16	SCAMP4		ENSG00000164949	17.3155	1.27771	0.509077	2.50986	0.0120779	0.0294343	GEM
ENSG00000157240	982.696	-0.614026	0.0648082	-9.47451	2.68e-21	4.39e-20	FZD1		ENSG00000023902	163.661	1.27795	0.190321	6.7147	1.88e-11	1.51e-10	PLEKHO1
ENSG00000129250	7600.41	-0.613464	0.0486121	-12.6196	1.65e-36	6.07e-35	KIF1C		ENSG00000092929	58.1032	1.27798	0.239434	5.33751	9.42e-08	5.24e-07	UNC13D
ENSG00000130962	740.41	-0.613365	0.0720317	-8.5152	1.66e-17	2.13e-16	PRRG1		ENSG00000250326	14.3501	1.27843	0.500871	2.55241	0.010698	0.0264445	AC104596.1
ENSG00000161179	2348.39	-0.613233	0.0621759	-9.86287	6.03e-23	1.09e-21	YDJC		ENSG00000224032	1333.32	1.27857	0.0973545	13.1331	2.13e-39	8.99e-38	EPB41L4A-AS1
ENSG00000257167	140.692	-0.612454	0.156861	-3.90443	9.44e-05	0.000354191	TMPO-AS1		ENSG00000237399	13.9097	1.27903	0.515089	2.48312	0.0130238	0.0315088	PITRM1-AS1
ENSG00000112033	1293.25	-0.612396	0.0746777	-8.20052	2.39e-16	2.83e-15	PPARD		ENSG00000233589	29.909	1.27922	0.4387	2.91594	0.0035462	0.0099129	AL138789.1
ENSG00000266208	209.212	-0.612339	0.115191	-5.31584	1.06e-07	5.87e-07	AC080112.1		ENSG00000264772	14.7284	1.28198	0.475925	2.69366	0.00706716	0.018348	AC016876.2
ENSG00000139372	2037.62	-0.612336	0.0482318	-12.6957	6.25e-37	2.34e-35	TDG		ENSG00000273599	141.577	1.28241	0.174594	7.34509	2.06e-13	1.97e-12	AL731571.1
ENSG00000230989	2888.34	-0.612324	0.0697294	-8.78142	1.61e-18	2.21e-17	HSBP1		ENSG00000168026	155.745	1.28504	0.164228	7.82475	5.09e-15	5.47e-14	TTC21A
ENSG00000152147	419.753	-0.612155	0.102282	-5.98496	2.16e-09	1.42e-08	GEMIN6		ENSG00000268362	52.1228	1.28575	0.252466	5.09277	3.53e-07	1.84e-06	AC092279.1
ENSG00000156298	86.1118	-0.612125	0.219066	-2.79425	0.00520206	0.013969	TSPAN7		ENSG00000272836	23.0857	1.28634	0.435002	2.95709	0.0031056	0.00878074	AL022328.1
ENSG00000214226	118.77	-0.611968	0.181831	-3.36559	0.00076381	0.00245505	C17orf67		ENSG00000126500	188.583	1.28644	0.13183	9.75834	1.7e-22	2.99e-21	FLRT1
ENSG00000139405	1612.42	-0.611583	0.0463556	-13.1933	9.59e-40	4.14e-38	RITA1		ENSG00000174945	17.3943	1.28725	0.496019	2.59517	0.00945452	0.0237467	AMZ1
ENSG00000109654	1690.34	-0.611336	0.0582845	-10.4888	9.72e-26	2.07e-24	TRIM2		ENSG00000255389	15.369	1.28732	0.515335	2.49802	0.012489	0.0303534	Z97989.1
ENSG00000204520	455.03	-0.611328	0.0958295	-6.37933	1.78e-10	1.3e-09	MICA		ENSG00000279863	16.2499	1.28853	0.436502	2.95194	0.00315788	0.00891397	AC069547.1
ENSG00000178966	1179.89	-0.610688	0.0537616	-11.3592	6.68e-30	1.77e-28	RMI1		ENSG00000253552	51.5698	1.28857	0.440295	2.92661	0.00342676	0.00960078	HOXA-AS2
ENSG00000136521	2437.49	-0.610638	0.0653642	-9.3421	9.44e-21	1.5e-19	NDUFB5		ENSG00000207110	13.1512	1.28994	0.449249	2.87132	0.00408761	0.0112635	RNU1-106P
ENSG00000100167	758.972	-0.610626	0.0675334	-9.04184	1.54e-19	2.24e-18	SEPTIN3		ENSG00000184860	28.5615	1.29037	0.354494	3.64005	0.000272588	0.000948385	SDR42E1
ENSG00000204310	1226.69	-0.610262	0.0991541	-6.15468	7.52e-10	5.18e-09	AGPAT1		ENSG00000271551	16.7533	1.29039	0.487676	2.646	0.00814501	0.020823	AL355297.4
ENSG00000068985	4724.91	-0.610018	0.0488396	-12.4902	8.44e-36	3e-34	PAGE1		ENSG00000279765	16.362	1.29087	0.457297	2.82282	0.00476029	0.0129058	AC013394.1
ENSG00000246082	750.143	-0.60981	0.0656846	-9.28391	1.63e-20	2.56e-19	NUDT16P1		ENSG00000078549	82.1513	1.29113	0.4357	2.96334	0.00304322	0.00861847	ADCYAP1R1
ENSG00000124789	2242.74	-0.609687	0.0473535	-12.8752	6.21e-38	2.43e-36	NUP153		ENSG00000257539	14.312	1.29135	0.460793	2.80245	0.00507157	0.0136597	HSPA8P14
ENSG00000276399	161.621	-0.60968	0.148411	-4.10806	3.99e-05	0.000158817	AC209154.1		ENSG00000106991	56.561	1.29142	0.272268	4.74318	2.1e-06	9.99e-06	ENG
ENSG00000240891	49.1104	-0.609577	0.237453	-2.56715	0.0102537	0.0254823	PLCXD2		ENSG00000265678	25.262	1.29387	0.369403	3.50259	0.000460766	0.00154301	AC129510.1
ENSG00000196167	525.421	-0.609492	0.088665	-6.8741	6.24e-12	5.2e-11	COLCA1		ENSG00000157330	33.3799	1.29424	0.285658	4.53073	5.88e-06	2.63e-05	C1orf158
ENSG00000106263	6345.09	-0.609451	0.0427861	-14.2441	4.87e-46	2.75e-44	EIF3B		ENSG00000169203	20.9109	1.29452	0.519853	2.49016	0.0127684	0.0309541	NPIPB12
ENSG00000102981	576.3	-0.609363	0.0821357	-7.41899	1.18e-13	1.15e-12	PARD6A		ENSG00000181322	19.8728	1.2946	0.432277	2.99483	0.00274596	0.0078478	NME9
ENSG00000170315	8390.44	-0.609144	0.0728518	-8.36142	6.2e-17	7.6e-16	UBB		ENSG00000204176	53.778	1.29467	0.48844	2.65063	0.00803421	0.0205824	SYT15
ENSG00000129353	2956.51	-0.608841	0.0490143	-12.4217	1.99e-35	6.95e-34	SLC44A2		ENSG00000253405	8.83766	1.29489	0.53907	2.40209	0.0163018	0.0383399	EVX1-AS
ENSG00000088325	3159.56	-0.608773	0.0513202	-11.8622	1.86e-32	5.62e-31	TPX2		ENSG00000269974	11.6148	1.29525	0.533727	2.42681	0.0152324	0.0361199	#N/A
ENSG00000167721	2501.77	-0.608483	0.0391089	-15.5587	1.39e-54	1.11e-52	TSR1		ENSG00000210100	29.5345	1.29692	0.375909	3.45008	0.000560418	0.00184807	MT-TI
ENSG00000174173	988.903	-0.608443	0.0841093	-7.23396	4.69e-13	4.34e-12	TRMT10C		ENSG00000261428	24.8652	1.29704	0.38747	3.34747	0.000815515	0.00260862	#N/A
ENSG00000183155	504.381	-0.608417	0.0746472	-8.15057	3.62e-16	4.22e-15	RABIF		ENSG00000257511	24.5875	1.29733	0.380891	3.40605	0.000659099	0.00214779	AC084824.1
ENSG00000161921	1637.22	-0.608299	0.0524164	-11.6051	3.88e-31	1.1e-29	CXCL16		ENSG00000198838	61.7578	1.29769	0.238923	5.4314	5.59e-08	3.19e-07	RYR3
ENSG00000261840	64.9667	-0.60813	0.214841	-2.83061	0.00464591	0.0126327	AC093249.6		ENSG00000119725	56.4825	1.29779	0.256509	5.05946	4.2e-07	2.16e-06	ZNF410
ENSG00000234171	513.842	-0.608112	0.0850843	-7.14717	8.86e-13	8e-12	RNASEH1-AS1		ENSG00000203985	57.4528	1.29849	0.24375	5.32716	9.98e-08	5.53e-07	LDLRAD1
ENSG00000144746	2714.6	-0.60735	0.0521802	-11.6395	2.6e-31	7.45e-30	ARL6IP5		ENSG00000210144	275.287	1.2985	0.210791	6.16015	7.27e-10	5.01e-09	MT-TY
ENSG00000278916	58.1269	-0.607097	0.220933	-2.74788	0.00599824	0.0158653	CEP83-DT		ENSG00000207721	17.8711	1.29987	0.564238	2.30376	0.0212363	0.0481577	MIR186
ENSG00000115756	779.366	-0.607039	0.0688731	-8.81387	1.21e-18	1.67e-17	HPCAL1		ENSG00000249626	116.638	1.29999	0.162259	8.01177	1.13e-15	1.27e-14	AC024560.2
ENSG00000277161	948.24	-0.606817	0.0747125	-8.12203	4.58e-16	5.3e-15	PIGW		ENSG00000138161	66.9078	1.30186	0.212113	6.13757	8.38e-10	5.74e-09	CUZD1
ENSG00000182272	1902.3	-0.606431	0.0582541	-10.4101	2.23e-25	4.64e-24	B4GALNT4		ENSG00000163660	1960.92	1.30234	0.0543936	23.9428	1.1e-126	5.37e-124	CCNL1
ENSG00000172663	2091.17	-0.606155	0.045168	-13.42	4.62e-41	2.14e-39	TMEM134		ENSG00000131634	16.2531	1.30234	0.463389	2.81047	0.00494694	0.0133643	TMEM204
ENSG00000170425	367.896	-0.605991	0.0906896	-6.68204	2.36e-11	1.87e-10	ADORA2B		ENSG00000152804	49.9573	1.30257	0.402273	3.23803	0.00120359	0.00370764	HHEX
ENSG00000174917	1516.63	-0.605867	0.0795544	-7.61576	2.62e-14	2.69e-13	MICOS13		ENSG00000224505	18.2242	1.30327	0.466082	2.79622	0.00517042	0.0138999	AC138150.1
ENSG00000143179	3438.37	-0.605746	0.0337579	-17.9438	5.37e-72	7.56e-70	UCK2		ENSG00000162458	166.417	1.30389	0.200591	6.50025	8.02e-11	6.07e-10	FBLIM1
ENSG00000237187	173.668	-0.605665	0.143811	-4.21154	2.54e-05	0.000103878	NR2F1-AS1		ENSG00000033327	337.286	1.30513	0.121315	10.7582	5.42e-27	1.24e-25	GAB2
ENSG00000165650	2317.58	-0.60548	0.0444793	-13.6126	3.37e-42	1.65e-40	PDZD8		ENSG00000280156	24.2902	1.30569	0.361433	3.61254	0.000303217	0.00104638	#N/A
ENSG00000168569	593.917	-0.605413	0.0823401	-7.35258	1.94e-13	1.87e-12	TMEM223		ENSG00000264577	81.4602	1.30595	0.276833	4.71747	2.39e-06	1.12e-05	AC010761.1
ENSG00000124299	849.923	-0.6054	0.0686377	-8.82022	1.14e-18	1.58e-17	PEPD		ENSG00000270194	102.896	1.30621	0.214086	6.10131	1.05e-09	7.15e-09	AC097359.2
ENSG00000100162	870.312	-0.605353	0.0799131	-7.57514	3.59e-14	3.63e-13	CENPM		ENSG00000266967	62.5448	1.30665	0.282522	4.62495	3.75e-06	1.72e-05	AARSD1
ENSG00000143942	306.642	-0.604457	0.10858	-5.56692	2.59e-08	1.53e-07	CHAC2		ENSG00000261408	47.131	1.30749	0.294886	4.43388	9.26e-06	4.04e-05	TEN1-CDK3
ENSG00000132016	188.796	-0.604415	0.134755	-4.4853	7.28e-06	3.22e-05	C19orf57		ENSG00000279159	80.7914	1.30757	0.244872	5.3398	9.3e-08	5.17e-07	AC003681.1
ENSG00000173402	4650.74	-0.604409	0.0673234	-8.9777	2.76e-19	3.96e-18	DAG1		ENSG00000250067	223.566	1.30948	0.175352	7.46772	8.16e-14	8.02e-13	YJEFN3
ENSG00000138777	2236.92	-0.603919	0.0561105	-10.763	5.14e-27	1.18e-25	PPA2		ENSG00000231920	39.0729	1.31042	0.352605	3.7164	0.000202082	0.000717236	NEBL-AS1
ENSG00000230513	165.499	-0.603742	0.137939	-4.37687	1.2e-05	5.15e-05	THAP7-AS1		ENSG00000047617	26.9319	1.31049	0.366364	3.57703	0.000347523	0.00118742	ANO2
ENSG00000177889	2836.86	-0.603541	0.0478896	-12.6028	2.04e-36	7.47e-35	UBE2N		ENSG00000229325	13.7596	1.31117	0.494629	2.65082	0.00802977	0.020575	ACAP2-IT1
ENSG00000119969	740.379	-0.603514	0.0951826	-6.34059	2.29e-10	1.66e-09	HELLS		ENSG00000257122	94.3488	1.31132	0.177363	7.3934	1.43e-13	1.39e-12	RRN3P3
ENSG00000111816	227.587	-0.603455	0.125131	-4.82258	1.42e-06	6.88e-06	FRK		ENSG00000261270	34.7438	1.31142	0.305606	4.2912	1.78e-05	7.42e-05	AC012181.2
ENSG00000232573	137.963	-0.602774	0.1659	-3.63335	0.000279767	0.000970367	RPL3P4		ENSG00000251485	18.3649	1.31164	0.466301	2.81287	0.00491021	0.0132761	AC068134.3
ENSG00000101464	770.206	-0.60219	0.0660488	-9.11735	7.7e-20	1.14e-18	PIGU		ENSG00000273271	20.6296	1.31173	0.483552	2.7127	0.00667381	0.0174377	AP000254.2
ENSG00000279140	58.8819	-0.601921	0.225928	-2.66422	0.00771672	0.0198455	AL590326.1		ENSG00000279089	60.1432	1.31222	0.278708	4.70823	2.5e-06	1.17e-05	AC005839.1
ENSG00000105655	2903.46	-0.601789	0.0619006	-9.72186	2.43e-22	4.22e-21	ISYNA1		ENSG00000276997	15.6348	1.31273	0.518976	2.52945	0.011424	0.0280225	AL513314.2
ENSG00000012211	632.392	-0.601785	0.0979206	-6.14564	7.96e-10	5.46e-09	PRICKLE3		ENSG00000246596	76.1423	1.31277	0.249148	5.26901	1.37e-07	7.48e-07	AC139795.1
ENSG00000151287	306.942	-0.60143	0.120446	-4.99337	5.93e-07	3.01e-06	TEX30		ENSG00000180044	44.9985	1.31497	0.377949	3.47924	0.000502841	0.00167375	C3orf80
ENSG00000276045	909.27	-0.60101	0.076896	-7.81589	5.46e-15	5.86e-14	ORAI1		ENSG00000175564	27.5786	1.31564	0.332146	3.96102	7.46e-05	0.00028473	UCP3
ENSG00000221955	839.249	-0.600284	0.0602452	-9.964	2.19e-23	4.07e-22	SLC12A8		ENSG00000261187	11.2008	1.31596	0.533813	2.46522	0.0136931	0.0329278	AC079322.1
ENSG00000165795	832.535	-0.60004	0.061786	-9.71158	2.69e-22	4.65e-21	NDRG2		ENSG00000273448	45.2532	1.31632	0.269578	4.88289	1.05e-06	5.15e-06	AC006480.2
ENSG00000229267	90.8669	-0.599831	0.258308	-2.32216	0.0202245	0.0462028	SNHG31		ENSG00000280753	33.1162	1.31713	0.408443	3.22476	0.00126079	0.00386637	#N/A
ENSG00000096433	2571.4	-0.599614	0.0739202	-8.11163	4.99e-16	5.75e-15	ITPR3		ENSG00000042286	57.8704	1.31753	0.302808	4.35105	1.35e-05	5.75e-05	AIFM2
ENSG00000275793	65.3327	-0.599563	0.253291	-2.36709	0.0179284	0.0416588	RIMBP3		ENSG00000135437	19.0703	1.31759	0.437215	3.01359	0.00258178	0.00743046	RDH5
ENSG00000171453	654.08	-0.599522	0.0680492	-8.81013	1.25e-18	1.73e-17	POLR1C		ENSG00000156886	28.4516	1.31832	0.367234	3.58986	0.00033086	0.00113388	ITGAD
ENSG00000203760	403.765	-0.599519	0.100506	-5.96503	2.45e-09	1.6e-08	CENPW		ENSG00000107731	1326.76	1.3187	0.0789988	16.6926	1.48e-62	1.54e-60	UNC5B
ENSG00000165672	8940.39	-0.5995	0.0502839	-11.9223	9.06e-33	2.77e-31	PRDX3		ENSG00000230454	158.189	1.31922	0.155003	8.51088	1.73e-17	2.21e-16	U73166.1
ENSG00000137038	1806.2	-0.599493	0.0866931	-6.91512	4.67e-12	3.92e-11	DMAC1		ENSG00000048740	157.653	1.31933	0.189517	6.96152	3.37e-12	2.87e-11	CELF2
ENSG00000112183	1021.32	-0.599359	0.0840851	-7.128	1.02e-12	9.15e-12	RBM24		ENSG00000277290	38.8262	1.31936	0.29534	4.46725	7.92e-06	3.49e-05	AC136475.10
ENSG00000170515	4538.2	-0.599077	0.0499405	-11.9958	3.74e-33	1.16e-31	PA2G4		ENSG00000280332	39.03	1.31968	0.309744	4.26054	2.04e-05	8.45e-05	AC020917.4
ENSG00000087111	3186.85	-0.598626	0.0482008	-12.4194	2.05e-35	7.14e-34	PIGS		ENSG00000182109	112.256	1.32093	0.218306	6.05083	1.44e-09	9.66e-09	#N/A
ENSG00000187193	162.668	-0.598472	0.183531	-3.26088	0.00111066	0.00345131	MT1X		ENSG00000166401	25.9558	1.32106	0.412837	3.19996	0.00137448	0.00418481	SERPINB8
ENSG00000100147	164.857	-0.598469	0.161968	-3.69498	0.000219901	0.000776017	CCDC134		ENSG00000205041	73.9421	1.32109	0.220286	5.99716	2.01e-09	1.33e-08	AC118344.1
ENSG00000067992	536.52	-0.598419	0.0839115	-7.13155	9.92e-13	8.93e-12	PDK3		ENSG00000251474	429.747	1.32122	0.100023	13.2092	7.77e-40	3.36e-38	RPL32P3
ENSG00000108423	390.228	-0.598204	0.0941043	-6.35682	2.06e-10	1.5e-09	TUBD1		ENSG00000205464	156.66	1.32158	0.15761	8.38513	5.07e-17	6.26e-16	ATP6AP1L
ENSG00000198133	67.0244	-0.597895	0.190243	-3.14279	0.00167346	0.00501437	TMEM229B		ENSG00000165507	55.4023	1.32182	0.28271	4.67554	2.93e-06	1.36e-05	DEPP1
ENSG00000164251	1082.02	-0.597837	0.0602765	-9.91824	3.47e-23	6.38e-22	F2RL1		ENSG00000073605	192.098	1.32196	0.145553	9.08233	1.06e-19	1.56e-18	GSDMB
ENSG00000171208	1510.09	-0.597475	0.0496602	-12.0312	2.43e-33	7.65e-32	NETO2		ENSG00000115112	105.685	1.32216	0.218034	6.06401	1.33e-09	8.93e-09	TFCP2L1
ENSG00000156504	1338.39	-0.597235	0.0654465	-9.12555	7.14e-20	1.06e-18	FAM122B		ENSG00000261794	34.0864	1.32416	0.345661	3.8308	0.00012773	0.000468355	GOLGA8H
ENSG00000175283	925.524	-0.597139	0.0695057	-8.59122	8.61e-18	1.12e-16	DOLK		ENSG00000253854	22.4623	1.32431	0.458927	2.88566	0.00390598	0.0108264	AC010834.3
ENSG00000228623	409.512	-0.59693	0.0966714	-6.17483	6.62e-10	4.58e-09	ZNF883		ENSG00000282870	44.7391	1.32433	0.291308	4.54616	5.46e-06	2.46e-05	FRG1DP
ENSG00000234949	334.62	-0.596675	0.110929	-5.37888	7.49e-08	4.21e-07	AC104667.2		ENSG00000181619	107.56	1.32518	0.21778	6.08495	1.17e-09	7.87e-09	GPR135
ENSG00000099810	1305.99	-0.596506	0.059542	-10.0182	1.27e-23	2.39e-22	MTAP		ENSG00000235029	46.3561	1.32576	0.278953	4.75263	2.01e-06	9.55e-06	MNX1-AS2
ENSG00000136478	2122.87	-0.596438	0.056566	-10.5441	5.41e-26	1.17e-24	TEX2		ENSG00000168675	42.4546	1.32648	0.423487	3.13229	0.00173448	0.00517449	LDLRAD4
ENSG00000102967	761.59	-0.596299	0.0802426	-7.43121	1.08e-13	1.05e-12	DHODH		ENSG00000255585	27.7008	1.32699	0.37859	3.50508	0.000456477	0.00153023	AL590627.1
ENSG00000181588	848.283	-0.596258	0.0923053	-6.45962	1.05e-10	7.85e-10	MEX3D		ENSG00000184613	83.5635	1.32721	0.276622	4.79794	1.6e-06	7.72e-06	NELL2
ENSG00000132361	6694.26	-0.595811	0.054705	-10.8913	1.27e-27	3.02e-26	CLUH		ENSG00000159164	92.9337	1.32754	0.33787	3.92914	8.52e-05	0.000322018	SV2A
ENSG00000164494	1115.46	-0.595231	0.0546879	-10.8842	1.37e-27	3.25e-26	PDSS2		ENSG00000244879	1443.73	1.32769	0.0648276	20.4803	3.23e-93	8.9e-91	GABPB1-AS1
ENSG00000181856	146.663	-0.595055	0.143163	-4.1565	3.23e-05	0.000130417	SLC2A4		ENSG00000213971	75.0156	1.32818	0.233506	5.68799	1.29e-08	7.78e-08	#N/A
ENSG00000004961	739.991	-0.594939	0.0752927	-7.90169	2.75e-15	3.02e-14	HCCS		ENSG00000238113	37.7771	1.32913	0.350114	3.79627	0.000146892	0.000533112	LINC01410
ENSG00000144840	1521.97	-0.594739	0.0609884	-9.75168	1.81e-22	3.18e-21	RABL3		ENSG00000279184	145.963	1.32915	0.182783	7.27171	3.55e-13	3.32e-12	#N/A
ENSG00000130165	1214.27	-0.594613	0.0683098	-8.70464	3.19e-18	4.28e-17	ELOF1		ENSG00000225449	89.697	1.32988	0.239438	5.55416	2.79e-08	1.64e-07	RAB6C-AS1
ENSG00000117054	3013.15	-0.594452	0.0727991	-8.16565	3.2e-16	3.75e-15	ACADM		ENSG00000144857	175.291	1.33003	0.217864	6.10486	1.03e-09	6.99e-09	BOC
ENSG00000063046	15839.6	-0.59445	0.0295769	-20.0985	7.61e-90	1.86e-87	EIF4B		ENSG00000136153	178.941	1.33031	0.171527	7.75565	8.79e-15	9.27e-14	LMO7
ENSG00000105997	148.338	-0.594423	0.222234	-2.67476	0.00747819	0.0192876	HOXA3		ENSG00000140839	17.9339	1.33134	0.437498	3.04307	0.00234176	0.00680522	CLEC18B
ENSG00000134901	331.268	-0.594408	0.11524	-5.158	2.5e-07	1.32e-06	POGLUT2		ENSG00000151090	1198.36	1.33184	0.0662877	20.0918	8.71e-90	2.11e-87	THRB
ENSG00000176842	157.623	-0.594397	0.124104	-4.78949	1.67e-06	8.03e-06	IRX5		ENSG00000178297	84.6132	1.33268	0.221694	6.01135	1.84e-09	1.22e-08	TMPRSS9
ENSG00000013583	804.111	-0.594152	0.0687453	-8.6428	5.49e-18	7.24e-17	HEBP1		ENSG00000131668	594.055	1.33469	0.14524	9.18957	3.94e-20	5.97e-19	BARX1
ENSG00000112667	2563.18	-0.593978	0.148421	-4.00198	6.28e-05	0.000242727	DNPH1		ENSG00000176222	58.6464	1.33521	0.282782	4.72168	2.34e-06	1.1e-05	ZNF404
ENSG00000177707	506.003	-0.593768	0.0713662	-8.32001	8.8e-17	1.07e-15	NECTIN3		ENSG00000243970	38.8123	1.33573	0.354593	3.76693	0.000165266	0.000594551	PPIEL
ENSG00000277232	74.0965	-0.593653	0.191269	-3.10375	0.00191084	0.00566087	GTSE1-DT		ENSG00000272301	20.9497	1.33625	0.460239	2.90339	0.00369142	0.0102789	#N/A
ENSG00000116791	589.973	-0.593539	0.0831167	-7.14103	9.26e-13	8.35e-12	CRYZ		ENSG00000247373	151.606	1.33649	0.149333	8.94972	3.56e-19	5.07e-18	TMED2-DT
ENSG00000135486	28691.1	-0.593271	0.0357786	-16.5817	9.45e-62	9.53e-60	HNRNPA1		ENSG00000258521	9.27035	1.33691	0.567076	2.35755	0.0183958	0.0425617	AL157871.2
ENSG00000074696	4300.36	-0.59325	0.0400042	-14.8297	9.42e-50	6.13e-48	HACD3		ENSG00000255717	3776.94	1.33881	0.0546293	24.5072	1.24e-132	6.68e-130	SNHG1
ENSG00000112242	1489.55	-0.593122	0.0514521	-11.5277	9.57e-31	2.68e-29	E2F3		ENSG00000077092	240.671	1.3391	0.190116	7.04359	1.87e-12	1.64e-11	RARB
ENSG00000110651	7034.29	-0.593104	0.0683719	-8.67467	4.15e-18	5.52e-17	CD81		ENSG00000170153	195.3	1.34028	0.223328	6.00139	1.96e-09	1.29e-08	RNF150
ENSG00000176463	68.4061	-0.593031	0.227984	-2.6012	0.00928974	0.0233759	SLCO3A1		ENSG00000116819	43.981	1.34158	0.273783	4.90015	9.58e-07	4.74e-06	TFAP2E
ENSG00000198324	542.485	-0.593012	0.0936587	-6.33163	2.43e-10	1.75e-09	PHETA1		ENSG00000147889	1711.01	1.34174	0.165977	8.08389	6.27e-16	7.18e-15	CDKN2A
ENSG00000228300	2004.91	-0.592712	0.0687272	-8.62411	6.46e-18	8.49e-17	FAM174C		ENSG00000245685	20.8839	1.34178	0.384603	3.48874	0.000485301	0.00161931	FRG1-DT
ENSG00000170011	675.516	-0.592674	0.0744064	-7.96536	1.65e-15	1.84e-14	MYRIP		ENSG00000215022	20.9213	1.3428	0.402162	3.33896	0.00084094	0.00268233	AL008729.1
ENSG00000133985	88.6536	-0.592647	0.180192	-3.28897	0.00100553	0.00315453	TTC9		ENSG00000234965	53.3037	1.34291	0.36377	3.69165	0.000222805	0.000785301	SHISA8
ENSG00000258429	357.824	-0.592595	0.113651	-5.21415	1.85e-07	9.92e-07	PDF		ENSG00000163806	24.762	1.34299	0.390621	3.43809	0.000585843	0.00192701	SPDYA
ENSG00000214194	2448.33	-0.592456	0.0817364	-7.24837	4.22e-13	3.92e-12	SMIM30		ENSG00000210077	84.1925	1.3444	0.275804	4.87449	1.09e-06	5.36e-06	MT-TV
ENSG00000197785	2667.93	-0.59225	0.0560956	-10.5579	4.67e-26	1.01e-24	ATAD3A		ENSG00000258317	11.4623	1.34516	0.527089	2.55205	0.0107092	0.0264647	AC034102.6
ENSG00000065485	2499.66	-0.591727	0.0503361	-11.7555	6.62e-32	1.96e-30	PDIA5		ENSG00000135678	14.9045	1.3462	0.570637	2.35912	0.0183183	0.0424127	CPM
ENSG00000139910	516.936	-0.591534	0.0827752	-7.14627	8.92e-13	8.05e-12	NOVA1		ENSG00000257896	18.1224	1.34627	0.532987	2.52589	0.0115406	0.0282685	AC093012.1
ENSG00000144040	577.472	-0.591369	0.0801516	-7.37813	1.61e-13	1.55e-12	SFXN5		ENSG00000279833	40.7977	1.34677	0.312735	4.30641	1.66e-05	6.96e-05	AL031846.2
ENSG00000157992	815.042	-0.591347	0.0623187	-9.48908	2.33e-21	3.83e-20	KRTCAP3		ENSG00000186594	220.527	1.34691	0.140381	9.59466	8.42e-22	1.42e-20	MIR22HG
ENSG00000001461	1088.57	-0.591317	0.0589731	-10.0269	1.16e-23	2.19e-22	NIPAL3		ENSG00000173531	348.736	1.34778	0.105413	12.7857	1.97e-37	7.53e-36	MST1
ENSG00000188290	1389.77	-0.591316	0.104964	-5.63353	1.77e-08	1.06e-07	HES4		ENSG00000281005	47.3881	1.34927	0.272616	4.94935	7.45e-07	3.73e-06	LINC00921
ENSG00000137692	2406.55	-0.591224	0.0551273	-10.7247	7.79e-27	1.77e-25	DCUN1D5		ENSG00000167676	220.496	1.34962	0.12566	10.7402	6.59e-27	1.5e-25	PLIN4
ENSG00000104356	567.896	-0.590725	0.0784458	-7.53036	5.06e-14	5.05e-13	POP1		ENSG00000204983	205.413	1.35011	0.152512	8.85247	8.56e-19	1.19e-17	PRSS1
ENSG00000115290	101.61	-0.589928	0.176347	-3.34527	0.000822012	0.00262713	GRB14		ENSG00000255337	22.1263	1.35124	0.360652	3.74666	0.000179206	0.000641137	AP001830.1
ENSG00000185130	58.2679	-0.589658	0.239159	-2.46555	0.0136803	0.0329044	HIST1H2BL		ENSG00000280434	38.1619	1.35138	0.323011	4.1837	2.87e-05	0.000116489	AL031595.3
ENSG00000129911	1212.96	-0.589189	0.0733863	-8.0286	9.86e-16	1.12e-14	KLF16		ENSG00000081052	22.5251	1.35193	0.437954	3.08692	0.00202244	0.0059649	COL4A4
ENSG00000004142	6606.57	-0.588854	0.0289554	-20.3366	6.1e-92	1.55e-89	POLDIP2		ENSG00000147231	1080.77	1.35245	0.121118	11.1664	5.96e-29	1.5e-27	RADX
ENSG00000123643	745.384	-0.588796	0.0754955	-7.79909	6.24e-15	6.67e-14	SLC36A1		ENSG00000226245	13.5649	1.35377	0.511403	2.64717	0.00811692	0.0207655	ZNF32-AS1
ENSG00000172469	933.296	-0.58869	0.0820221	-7.17722	7.11e-13	6.48e-12	MANEA		ENSG00000105270	92.3664	1.35416	0.190055	7.12509	1.04e-12	9.33e-12	CLIP3
ENSG00000109519	2470.8	-0.588069	0.0476566	-12.3397	5.53e-35	1.89e-33	GRPEL1		ENSG00000198932	92.5741	1.35458	0.199185	6.80061	1.04e-11	8.52e-11	GPRASP1
ENSG00000111671	294.76	-0.587144	0.114303	-5.13674	2.8e-07	1.47e-06	SPSB2		ENSG00000158747	303.696	1.35491	0.558422	2.42632	0.0152528	0.0361597	NBL1
ENSG00000180694	530.721	-0.586934	0.0836649	-7.0153	2.29e-12	1.99e-11	TMEM64		ENSG00000154898	25.74	1.35531	0.418892	3.23546	0.00121446	0.00373713	CCDC144CP
ENSG00000134202	2307.18	-0.586789	0.0550631	-10.6567	1.62e-26	3.63e-25	GSTM3		ENSG00000234911	11.6489	1.35562	0.522175	2.59611	0.0094287	0.0236884	TEX21P
ENSG00000176422	1103.26	-0.586697	0.078167	-7.50568	6.11e-14	6.07e-13	SPRYD4		ENSG00000261490	11.2239	1.35588	0.591813	2.29106	0.0219601	0.0495561	AC005674.2
ENSG00000143294	2372.99	-0.586245	0.0479862	-12.2169	2.52e-34	8.33e-33	PRCC		ENSG00000281207	81.9196	1.35617	0.242283	5.59747	2.18e-08	1.29e-07	SLFNL1-AS1
ENSG00000124767	6263.86	-0.586222	0.0508183	-11.5356	8.72e-31	2.44e-29	GLO1		ENSG00000205927	59.8165	1.35663	0.249311	5.44152	5.28e-08	3.02e-07	OLIG2
ENSG00000101337	2833.53	-0.586197	0.0572168	-10.2452	1.24e-24	2.5e-23	TM9SF4		ENSG00000166025	706.003	1.35732	0.130383	10.4102	2.23e-25	4.63e-24	AMOTL1
ENSG00000196584	1197.74	-0.586002	0.0774477	-7.56641	3.84e-14	3.87e-13	XRCC2		ENSG00000228146	88.8455	1.35737	0.189521	7.16214	7.94e-13	7.19e-12	CASP16P
ENSG00000171314	7865.76	-0.585964	0.0476005	-12.31	8e-35	2.72e-33	PGAM1		ENSG00000183091	145.463	1.35772	0.195374	6.94932	3.67e-12	3.12e-11	NEB
ENSG00000048162	983.365	-0.585745	0.0564023	-10.3851	2.9e-25	5.98e-24	NOP16		ENSG00000168032	53.9155	1.35805	0.227935	5.95807	2.55e-09	1.66e-08	ENTPD3
ENSG00000137133	2115.54	-0.585355	0.0690581	-8.47626	2.33e-17	2.96e-16	HINT2		ENSG00000203799	64.8303	1.35824	0.3032	4.47967	7.48e-06	3.3e-05	CCDC162P
ENSG00000142669	869.055	-0.58507	0.11294	-5.18039	2.21e-07	1.18e-06	SH3BGRL3		ENSG00000213199	89.9631	1.35924	0.325666	4.17372	3e-05	0.000121425	ASIC3
ENSG00000177192	1243.28	-0.585005	0.0804733	-7.26955	3.61e-13	3.38e-12	PUS1		ENSG00000007264	226.424	1.35947	0.249799	5.44225	5.26e-08	3e-07	MATK
ENSG00000128973	1551.7	-0.584946	0.0582482	-10.0423	9.93e-24	1.89e-22	CLN6		ENSG00000100968	205.58	1.35958	0.148234	9.17185	4.65e-20	7.01e-19	NFATC4
									ENSG00000042832	25.8802	1.36129	0.584929	2.32727	0.0199508	0.045658	TG
									ENSG00000258325	13.7354	1.36159	0.555162	2.4526	0.0141829	0.033945	ITFG2-AS1
									ENSG00000254694	12.6105	1.36225	0.560652	2.42976	0.015109	0.0358961	AP001893.1
									ENSG00000147437	15.5217	1.36369	0.497927	2.73874	0.00616756	0.0162667	GNRH1
									ENSG00000271092	17.6639	1.36455	0.482541	2.82785	0.00468618	0.0127275	TLCD4-RWDD3
									ENSG00000144712	171.675	1.36582	0.261463	5.22378	1.75e-07	9.45e-07	CAND2
									ENSG00000159921	300.725	1.36685	0.23557	5.80229	6.54e-09	4.09e-08	GNE
									ENSG00000223685	37.0053	1.36685	0.318383	4.29312	1.76e-05	7.37e-05	LINC00571
									ENSG00000278931	62.5963	1.36741	0.283447	4.82423	1.41e-06	6.82e-06	CR381670.1
									ENSG00000100604	13.1457	1.36833	0.522317	2.61974	0.00879969	0.0222704	CHGA
									ENSG00000115963	4333.06	1.36887	0.053697	25.4924	2.39e-143	1.67e-140	RND3
									ENSG00000228302	19.9761	1.36895	0.434294	3.15212	0.00162088	0.00486978	AL512770.1
									ENSG00000272720	34.5318	1.36946	0.389388	3.51694	0.00043655	0.00146875	AL022322.1
									ENSG00000029534	35.3783	1.36952	0.417488	3.28038	0.00103667	0.00324045	ANK1
									ENSG00000168298	168.067	1.36998	0.188595	7.26413	3.75e-13	3.51e-12	HIST1H1E
									ENSG00000239388	41.608	1.37026	0.321368	4.26383	2.01e-05	8.34e-05	ASB14
									ENSG00000010438	66.7311	1.37092	0.212942	6.43802	1.21e-10	9e-10	PRSS3
									ENSG00000196407	57.2146	1.37107	0.263041	5.21237	1.86e-07	1e-06	THEM5
									ENSG00000262445	9.28183	1.37111	0.527666	2.59843	0.00936502	0.0235425	AC099684.2
									ENSG00000159708	37.5973	1.3721	0.34372	3.99192	6.55e-05	0.000252655	LRRC36
									ENSG00000229127	21.3154	1.37291	0.421929	3.25388	0.00113839	0.00352904	AC007038.1
									ENSG00000004399	230.587	1.37311	0.209677	6.54866	5.81e-11	4.45e-10	PLXND1
									ENSG00000205085	86.6833	1.37317	0.202123	6.79373	1.09e-11	8.91e-11	FAM71F2
									ENSG00000226686	43.9091	1.37347	0.365618	3.75658	0.000172255	0.00061806	LINC01535
									ENSG00000239665	275.444	1.37382	0.150828	9.10857	8.35e-20	1.23e-18	AL157392.3
									ENSG00000282774	11.7234	1.3751	0.546399	2.51666	0.0118475	0.0289271	#N/A
									ENSG00000008226	31.9853	1.37578	0.365364	3.76551	0.000166212	0.00059787	DLEC1
									ENSG00000197119	1643.55	1.37743	0.076189	18.0791	4.66e-73	6.7e-71	SLC25A29
									ENSG00000246876	28.757	1.37787	0.343887	4.00675	6.16e-05	0.000238478	LINC02466
									ENSG00000134548	33.9267	1.37865	0.365681	3.7701	0.000163181	0.0005877	SPX
									ENSG00000258559	26.0446	1.37911	0.401251	3.43704	0.000588114	0.00193423	AC005519.1
									ENSG00000237863	79.6152	1.37952	0.385187	3.58143	0.000341718	0.00116928	AL035425.1
									ENSG00000272578	58.6308	1.37985	0.257882	5.35071	8.76e-08	4.88e-07	AP000347.1
									ENSG00000207741	21.4559	1.37989	0.405407	3.40372	0.000664745	0.00216456	MIR590
									ENSG00000218226	26.5589	1.38017	0.460863	2.99475	0.00274672	0.0078491	TATDN2P2
									ENSG00000274813	34.3398	1.38018	0.326306	4.22969	2.34e-05	9.63e-05	AC126915.2
									ENSG00000277399	19.8745	1.3809	0.426727	3.23604	0.00121201	0.00373167	GPR179
									ENSG00000150625	40.3269	1.38092	0.561133	2.46095	0.0138569	0.0332599	GPM6A
									ENSG00000223401	38.6849	1.38358	0.335969	4.11819	3.82e-05	0.000152353	#N/A
									ENSG00000211892	20.8504	1.38405	0.478659	2.89151	0.00383398	0.0106496	IGHG4
									ENSG00000276075	9.35742	1.3843	0.598499	2.31295	0.0207255	0.0471809	AC027682.6
									ENSG00000260597	193.755	1.38558	0.154383	8.97494	2.84e-19	4.05e-18	AC012531.1
									ENSG00000166582	375.15	1.38693	0.160749	8.62796	6.25e-18	8.22e-17	CENPV
									ENSG00000265800	15.4448	1.38728	0.475175	2.91951	0.00350577	0.00980625	AC022211.3
									ENSG00000131409	65.6297	1.38739	0.315231	4.40119	1.08e-05	4.65e-05	LRRC4B
									ENSG00000015479	112.766	1.38787	0.202151	6.86553	6.62e-12	5.51e-11	MATR3
									ENSG00000143333	304.683	1.38839	0.193348	7.18077	6.93e-13	6.32e-12	RGS16
									ENSG00000263089	32.8488	1.38843	0.330402	4.20224	2.64e-05	0.000107866	AC007114.2
									ENSG00000258515	24.8314	1.3889	0.370451	3.74922	0.000177383	0.000635229	AL355075.2
									ENSG00000134668	36.6686	1.38916	0.427448	3.2499	0.00115445	0.00356985	SPOCD1
									ENSG00000230373	37.3425	1.3901	0.347023	4.00579	6.18e-05	0.000239266	GOLGA6L5P
									ENSG00000279549	10.6414	1.39043	0.566296	2.45531	0.0140763	0.0337147	AP000437.1
									ENSG00000272750	17.7185	1.39069	0.449259	3.09552	0.00196469	0.00580778	AL592148.3
									ENSG00000162434	909.729	1.3916	0.0761634	18.2712	1.4e-74	2.15e-72	JAK1
									ENSG00000268049	38.8964	1.39245	0.364486	3.82033	0.000133275	0.000487239	AC012313.2
									ENSG00000117114	1496.4	1.39307	0.0600645	23.1929	5.37e-119	2.28e-116	ADGRL2
									ENSG00000281789	14.759	1.3931	0.496643	2.80504	0.00503107	0.0135689	#N/A
									ENSG00000168824	58.154	1.39317	0.354765	3.92703	8.6e-05	0.000324624	NSG1
									ENSG00000150627	104.381	1.39482	0.305171	4.57062	4.86e-06	2.2e-05	WDR17
									ENSG00000214783	43.1195	1.39495	0.292755	4.76489	1.89e-06	9.01e-06	POLR2J4
									ENSG00000197989	682.619	1.39503	0.114165	12.2195	2.45e-34	8.09e-33	SNHG12
									ENSG00000246339	20.9734	1.39526	0.498871	2.79683	0.00516073	0.0138767	EXTL3-AS1
									ENSG00000144868	28.3065	1.39544	0.415254	3.36045	0.000778155	0.00249651	TMEM108
									ENSG00000274938	20.3659	1.39545	0.430463	3.24174	0.00118802	0.00366447	#N/A
									ENSG00000165025	181.968	1.39565	0.196295	7.10992	1.16e-12	1.04e-11	SYK
									ENSG00000176945	14.0895	1.39657	0.528509	2.64246	0.00823054	0.0210105	MUC20
									ENSG00000153291	234.893	1.39817	0.15865	8.81292	1.22e-18	1.68e-17	SLC25A27
									ENSG00000071991	15.6307	1.39942	0.499002	2.80444	0.00504045	0.0135885	CDH19
									ENSG00000135919	106.215	1.39945	0.243113	5.75635	8.6e-09	5.3e-08	SERPINE2
									ENSG00000204622	23.7188	1.40036	0.466104	3.0044	0.00266103	0.0076323	HLA-J
									ENSG00000254505	25.1675	1.40137	0.37952	3.69249	0.000222071	0.000783143	CHMP4A
									ENSG00000273554	39.1054	1.40163	0.281166	4.98506	6.19e-07	3.13e-06	AC136616.1
									ENSG00000271662	47.8891	1.40202	0.248568	5.64041	1.7e-08	1.02e-07	AC233280.2
									ENSG00000196295	604.083	1.40204	0.0821963	17.0572	3.09e-65	3.69e-63	GARS-DT
									ENSG00000223473	112.733	1.40239	0.180041	7.78928	6.74e-15	7.19e-14	#N/A
									ENSG00000198682	97.325	1.40243	0.297423	4.71526	2.41e-06	1.14e-05	PAPSS2
									ENSG00000142494	163.855	1.40317	0.361234	3.88438	0.000102593	0.000382353	SLC47A1
									ENSG00000125999	18.9168	1.40374	0.548932	2.55722	0.0105511	0.0261287	BPIFB1
									ENSG00000185070	93.8003	1.40411	0.19595	7.16565	7.74e-13	7.02e-12	FLRT2
									ENSG00000216775	113.459	1.40617	0.193716	7.25891	3.9e-13	3.64e-12	AL109918.1
									ENSG00000103313	14.094	1.40647	0.509129	2.76251	0.00573591	0.0152368	MEFV
									ENSG00000268230	59.7821	1.40668	0.233442	6.02583	1.68e-09	1.12e-08	AC012313.3
									ENSG00000162496	1032.91	1.4067	0.0832088	16.9056	4.09e-64	4.65e-62	DHRS3
									ENSG00000159588	55.6849	1.40846	0.241339	5.83603	5.35e-09	3.38e-08	CCDC17
									ENSG00000003987	36.607	1.40895	0.368151	3.82709	0.000129666	0.000474525	MTMR7
									ENSG00000113555	26.2759	1.40935	0.374609	3.76218	0.000168436	0.00060545	PCDH12
									ENSG00000182742	81.5239	1.41007	0.249134	5.65989	1.51e-08	9.12e-08	HOXB4
									ENSG00000144935	189.86	1.41021	0.185256	7.61226	2.69e-14	2.76e-13	TRPC1
									ENSG00000120820	87.2798	1.41096	0.30752	4.58817	4.47e-06	2.03e-05	GLT8D2
									ENSG00000250608	23.7201	1.41227	0.371947	3.79695	0.000146485	0.000532081	AC010210.1
									ENSG00000280069	16.5801	1.41259	0.462191	3.0563	0.00224088	0.00654581	AC127024.8
									ENSG00000265386	22.0169	1.41292	0.433397	3.26011	0.0011137	0.00346035	RN7SL219P
									ENSG00000117281	13.3293	1.41296	0.536216	2.63507	0.00841206	0.0214148	CD160
									ENSG00000182240	329.736	1.41459	0.161509	8.75856	1.98e-18	2.69e-17	BACE2
									ENSG00000180447	189.285	1.41467	0.237655	5.95263	2.64e-09	1.72e-08	GAS1
									ENSG00000280388	19.5504	1.41483	0.43201	3.275	0.00105662	0.00329885	AC006330.1
									ENSG00000265366	15.1059	1.41489	0.483674	2.9253	0.00344123	0.00963744	GLUD1P2
									ENSG00000187775	55.4872	1.4153	0.267271	5.29536	1.19e-07	6.52e-07	DNAH17
									ENSG00000007314	61.1489	1.41626	0.288687	4.90586	9.3e-07	4.61e-06	SCN4A
									ENSG00000171790	66.3115	1.41705	0.274261	5.16677	2.38e-07	1.26e-06	SLFNL1
									ENSG00000122477	65.3843	1.41839	0.221082	6.41566	1.4e-10	1.04e-09	LRRC39
									ENSG00000235601	9.41614	1.41927	0.598997	2.3694	0.0178168	0.0414329	BARX1-DT
									ENSG00000261254	27.8586	1.41951	0.360905	3.93318	8.38e-05	0.000316975	#N/A
									ENSG00000236830	273.381	1.42023	0.1272	11.1653	6.03e-29	1.52e-27	CBR3-AS1
									ENSG00000103154	47.222	1.42032	0.345099	4.11569	3.86e-05	0.000153867	NECAB2
									ENSG00000160097	27.4934	1.42066	0.453682	3.1314	0.00173973	0.00518954	FNDC5
									ENSG00000267002	752.969	1.4211	0.07629	18.6277	1.92e-77	3.29e-75	AC060780.1
									ENSG00000274363	8.47503	1.42204	0.592743	2.39908	0.0164364	0.038618	AC087742.1
									ENSG00000271895	32.5828	1.42289	0.349818	4.06752	4.75e-05	0.000187157	AL109811.2
									ENSG00000258674	18.2548	1.4231	0.469632	3.03024	0.00244359	0.00706784	AC011448.1
									ENSG00000186603	14.5483	1.42352	0.475265	2.99521	0.00274252	0.00784056	HPDL
									ENSG00000237672	8.58839	1.42371	0.6217	2.29003	0.0220194	0.049664	KRR1P1
									ENSG00000232354	16.0743	1.42461	0.406703	3.50283	0.000460345	0.0015422	VIPR1-AS1
									ENSG00000231177	21.0833	1.42471	0.388219	3.66985	0.000242689	0.000850871	LINC00852
									ENSG00000204172	445.215	1.42679	0.113469	12.5743	2.92e-36	1.06e-34	AGAP9
									ENSG00000154874	266.986	1.42899	0.130466	10.953	6.43e-28	1.55e-26	CCDC144B
									ENSG00000213077	18.0796	1.42948	0.428935	3.33262	0.000860318	0.00273673	#N/A
									ENSG00000107295	18.795	1.43132	0.551341	2.59608	0.00942946	0.0236884	SH3GL2
									ENSG00000262692	22.43	1.43138	0.463733	3.08663	0.00202436	0.00596987	AC116914.2
									ENSG00000224316	23.1154	1.43142	0.392447	3.64742	0.000264891	0.000922722	GTF2IP5
									ENSG00000205763	42.0108	1.43265	0.4594	3.11852	0.0018176	0.00540193	RP9P
									ENSG00000159958	62.3446	1.43428	0.340767	4.20897	2.57e-05	0.000104967	TNFRSF13C
									ENSG00000278112	18.5334	1.43467	0.422984	3.39179	0.00069437	0.00225084	AC145423.3
									ENSG00000259668	38.101	1.43474	0.310483	4.62098	3.82e-06	1.75e-05	AC066613.1
									ENSG00000115226	69.3759	1.43592	0.317625	4.52079	6.16e-06	2.75e-05	FNDC4
									ENSG00000234719	57.0891	1.43665	0.283092	5.07487	3.88e-07	2.01e-06	NPIPB2
									ENSG00000249413	24.6948	1.43688	0.389828	3.68593	0.000227865	0.000801718	AC116049.2
									ENSG00000204420	10.2979	1.43859	0.560712	2.56564	0.0102985	0.0255692	MPIG6B
									ENSG00000139351	41.1762	1.4387	0.294518	4.88493	1.03e-06	5.1e-06	SYCP3
									ENSG00000258646	9.60729	1.43952	0.621488	2.31625	0.0205445	0.0468223	AL049780.1
									ENSG00000118292	32.0033	1.44061	0.447207	3.22136	0.00127586	0.00390841	C1orf54
									ENSG00000271270	197.818	1.44108	0.196463	7.33516	2.21e-13	2.12e-12	TMCC1-AS1
									ENSG00000205740	61.5713	1.44194	0.248709	5.79769	6.72e-09	4.2e-08	AL359878.1
									ENSG00000269937	28.0083	1.44262	0.46912	3.07516	0.00210389	0.0061805	AC093525.7
									ENSG00000116299	15.0711	1.44302	0.483202	2.98636	0.00282319	0.0080517	KIAA1324
									ENSG00000196696	89.8623	1.44364	0.225718	6.39575	1.6e-10	1.17e-09	AC009022.1
									ENSG00000210156	11.9461	1.4437	0.501374	2.8795	0.00398311	0.0110114	MT-TK
									ENSG00000279356	11.1802	1.44378	0.616594	2.34155	0.019204	0.044183	AC007610.4
									ENSG00000270392	30.7414	1.44406	0.437273	3.30242	0.000958548	0.00301882	PFN1P2
									ENSG00000237517	120.603	1.44472	0.190551	7.58181	3.41e-14	3.45e-13	DGCR5
									ENSG00000075213	106.907	1.44561	0.238778	6.05417	1.41e-09	9.46e-09	SEMA3A
									ENSG00000185437	432.041	1.44603	0.144729	9.99131	1.66e-23	3.11e-22	SH3BGR
									ENSG00000103202	955.031	1.44754	0.110196	13.136	2.05e-39	8.67e-38	NME4
									ENSG00000225213	13.935	1.44817	0.518717	2.79184	0.005241	0.0140663	AC073367.1
									ENSG00000280328	35.5939	1.44854	0.332201	4.36044	1.3e-05	5.53e-05	#N/A
									ENSG00000108379	88.7059	1.45033	0.272887	5.31478	1.07e-07	5.9e-07	WNT3
									ENSG00000231196	22.6188	1.45148	0.3664	3.96146	7.45e-05	0.000284247	#N/A
									ENSG00000238961	10.4145	1.4517	0.541592	2.68043	0.0073528	0.0190115	SNORA47
									ENSG00000263847	28.1181	1.45199	0.329778	4.40292	1.07e-05	4.61e-05	AP005899.1
									ENSG00000223749	61.496	1.45233	0.350999	4.13771	3.51e-05	0.000140734	MIR503HG
									ENSG00000242759	52.723	1.45251	0.27303	5.31995	1.04e-07	5.74e-07	LINC00882
									ENSG00000249628	14.3069	1.45487	0.542127	2.68363	0.00728281	0.0188474	LINC00942
									ENSG00000188162	14.7673	1.45519	0.555137	2.62131	0.00875923	0.0221853	OTOG
									ENSG00000157306	41.2996	1.45635	0.315539	4.61545	3.92e-06	1.8e-05	ZFHX2-AS1
									ENSG00000185950	412.647	1.45676	0.127793	11.3993	4.21e-30	1.13e-28	IRS2
									ENSG00000177359	34.2278	1.4578	0.445384	3.27314	0.00106361	0.00331904	AC024940.2
									ENSG00000266538	9.69318	1.45808	0.636664	2.29019	0.0220106	0.0496484	AC005838.2
									ENSG00000260608	16.7821	1.45884	0.462488	3.15432	0.00160874	0.00483656	AC024270.4
									ENSG00000146021	136.184	1.46117	0.191944	7.61246	2.69e-14	2.75e-13	KLHL3
									ENSG00000009724	60.133	1.46122	0.231631	6.30841	2.82e-10	2.03e-09	MASP2
									ENSG00000271843	8.59008	1.46183	0.62925	2.32314	0.0201719	0.0461028	AC012557.1
									ENSG00000236358	9.77269	1.46199	0.57281	2.55231	0.010701	0.0264469	AL355472.2
									ENSG00000213376	6.41505	1.46203	0.605921	2.41291	0.0158259	0.0373527	GAPDHP71
									ENSG00000257354	54.4658	1.46226	0.26787	5.45884	4.79e-08	2.75e-07	AC048341.1
									ENSG00000175197	2740.1	1.46322	0.0702947	20.8155	3.13e-96	9.23e-94	DDIT3
									ENSG00000235023	21.0946	1.46362	0.407002	3.59611	0.000323017	0.0011088	AP001626.1
									ENSG00000124091	10.1811	1.46398	0.590217	2.48042	0.0131229	0.0317244	GCNT7
									ENSG00000177455	18.8024	1.46469	0.526074	2.78419	0.00536609	0.0143648	CD19
									ENSG00000277778	12.8863	1.46576	0.561213	2.61178	0.00900734	0.022747	PGM5P2
									ENSG00000166682	10.294	1.4664	0.570611	2.56987	0.0101735	0.0253147	TMPRSS5
									ENSG00000274383	16.7816	1.46701	0.446727	3.2839	0.00102382	0.00320685	AC103691.1
									ENSG00000187720	261.117	1.4674	0.113202	12.9628	1.99e-38	7.97e-37	THSD4
									ENSG00000230551	534.536	1.4677	0.10034	14.6273	1.88e-48	1.17e-46	AC021078.1
									ENSG00000230006	19.6992	1.46815	0.39413	3.72503	0.000195289	0.000695415	ANKRD36BP2
									ENSG00000166503	540.046	1.4686	0.109985	13.3527	1.14e-40	5.16e-39	HDGFL3
									ENSG00000155657	309.028	1.46934	0.13798	10.6489	1.76e-26	3.94e-25	TTN
									ENSG00000163430	1097.42	1.46964	0.099157	14.8213	1.07e-49	6.93e-48	FSTL1
									ENSG00000232653	42.4419	1.4705	0.334626	4.39447	1.11e-05	4.78e-05	GOLGA8N
									ENSG00000182632	9.94094	1.47095	0.639924	2.29864	0.0215257	0.0486987	CCNYL2
									ENSG00000226942	38.8474	1.47116	0.313533	4.69221	2.7e-06	1.26e-05	IL9RP3
									ENSG00000177989	600.442	1.47293	0.0918631	16.0339	7.4e-58	6.71e-56	ODF3B
									ENSG00000261662	20.2261	1.47338	0.463766	3.17698	0.00148816	0.00449658	#N/A
									ENSG00000224389	8.74691	1.4735	0.614681	2.39718	0.0165219	0.0387836	C4B
									ENSG00000225313	36.241	1.47442	0.283913	5.19323	2.07e-07	1.1e-06	AL513327.1
									ENSG00000255366	19.3659	1.47458	0.542138	2.71993	0.00652959	0.0171001	AC120036.4
									ENSG00000270876	11.8315	1.47562	0.527022	2.79991	0.00511166	0.0137591	ZNF30-AS1
									ENSG00000162929	194.096	1.47596	0.140954	10.4712	1.17e-25	2.48e-24	KIAA1841
									ENSG00000197670	69.6206	1.476	0.235055	6.27938	3.4e-10	2.43e-09	AL157838.1
									ENSG00000166546	16.882	1.47602	0.572805	2.57682	0.0099713	0.0248759	BEAN1
									ENSG00000278434	11.2672	1.47616	0.525912	2.80685	0.00500281	0.0134997	AC023830.3
									ENSG00000114841	172.223	1.47621	0.159988	9.22697	2.78e-20	4.27e-19	DNAH1
									ENSG00000245275	23.1403	1.47722	0.346018	4.26921	1.96e-05	8.15e-05	SAP30L-AS1
									ENSG00000233327	15.918	1.47765	0.495724	2.98079	0.00287506	0.00818697	USP32P2
									ENSG00000273308	20.3781	1.478	0.42014	3.51788	0.000435014	0.00146415	AC024560.3
									ENSG00000242028	99.1301	1.47841	0.193087	7.65672	1.91e-14	1.97e-13	HYPK
									ENSG00000236255	118.62	1.47849	0.183567	8.0542	8e-16	9.12e-15	AC009404.1
									ENSG00000229519	10.8777	1.47873	0.550044	2.68839	0.0071798	0.0186125	AL591866.1
									ENSG00000167578	19.7945	1.47925	0.396021	3.73528	0.000187507	0.00066899	RAB4B
									ENSG00000277893	7.1711	1.47957	0.618319	2.3929	0.0167159	0.0391963	SRD5A2
									ENSG00000273305	14.8037	1.47972	0.470613	3.14423	0.00166522	0.00499257	AC009237.15
									ENSG00000226167	12.1694	1.48107	0.501871	2.95109	0.0031665	0.00893633	AP4B1-AS1
									ENSG00000123570	45.3958	1.48432	0.366749	4.04723	5.18e-05	0.000202782	RAB9B
									ENSG00000264057	9.08416	1.48444	0.628244	2.36284	0.0181355	0.0420645	AC103810.1
									ENSG00000268947	18.5014	1.48518	0.425374	3.49147	0.000480365	0.0016045	AC002128.1
									ENSG00000112541	197.173	1.48574	0.139759	10.6307	2.14e-26	4.76e-25	PDE10A
									ENSG00000235159	14.1662	1.48663	0.484283	3.06975	0.00214237	0.00628499	AL121672.2
									ENSG00000230912	12.2022	1.487	0.619887	2.39883	0.0164475	0.038637	AL021707.4
									ENSG00000261118	15.7872	1.48707	0.465915	3.19171	0.00141431	0.0042965	AC092123.1
									ENSG00000117425	66.1267	1.48754	0.275793	5.39368	6.9e-08	3.9e-07	PTCH2
									ENSG00000256667	34.1066	1.48782	0.39823	3.73608	0.000186913	0.000667147	KLRA1P
									ENSG00000279748	8.39115	1.48839	0.614013	2.42403	0.0153492	0.0363655	AC008764.9
									ENSG00000275485	10.494	1.49031	0.637564	2.3375	0.0194131	0.0446125	AL512652.1
									ENSG00000268218	71.7989	1.49157	0.223711	6.66741	2.6e-11	2.06e-10	AC137932.3
									ENSG00000100767	17.5089	1.49219	0.485828	3.07144	0.00213026	0.00625086	PAPLN
									ENSG00000163297	69.4011	1.49284	0.302825	4.92971	8.24e-07	4.11e-06	ANTXR2
									ENSG00000275180	17.1693	1.49291	0.600209	2.48732	0.012871	0.0311765	AC048341.2
									ENSG00000186952	29.9777	1.49331	0.344386	4.33615	1.45e-05	6.13e-05	TMEM232
									ENSG00000164099	88.5669	1.49405	0.282623	5.28637	1.25e-07	6.84e-07	PRSS12
									ENSG00000268201	9.47862	1.49448	0.540584	2.76456	0.00569999	0.0151476	AC020915.1
									ENSG00000247982	29.4443	1.49494	0.340301	4.393	1.12e-05	4.81e-05	LINC00926
									ENSG00000116678	190.843	1.49503	0.228379	6.54623	5.9e-11	4.52e-10	LEPR
									ENSG00000085276	148.849	1.49535	0.278956	5.36052	8.3e-08	4.63e-07	MECOM
									ENSG00000184384	27.858	1.49609	0.55003	2.72001	0.00652793	0.0170988	MAML2
									ENSG00000232022	31.6255	1.4988	0.453298	3.30643	0.000944913	0.00298095	FAAHP1
									ENSG00000246366	12.4864	1.49951	0.500583	2.99554	0.00273961	0.00783485	LACTB2-AS1
									ENSG00000279789	60.897	1.50092	0.252412	5.94633	2.74e-09	1.78e-08	AC120114.3
									ENSG00000205323	53.7063	1.50102	0.292051	5.13957	2.75e-07	1.45e-06	SARNP
									ENSG00000228526	159.952	1.50348	0.146017	10.2966	7.3e-25	1.48e-23	MIR34AHG
									ENSG00000112309	24.3327	1.5036	0.55481	2.71011	0.00672601	0.0175596	B3GAT2
									ENSG00000226711	27.9253	1.50437	0.460623	3.26594	0.00109101	0.00339515	FAM66C
									ENSG00000215252	1345.71	1.50521	0.0714948	21.0534	2.13e-98	6.8e-96	GOLGA8B
									ENSG00000197978	341.419	1.50679	0.110072	13.689	1.18e-42	5.86e-41	GOLGA6L9
									ENSG00000279233	159.309	1.50751	0.176055	8.56273	1.1e-17	1.42e-16	AC122688.3
									ENSG00000226029	11.0914	1.50754	0.594337	2.53651	0.0111964	0.0275188	LINC01772
									ENSG00000269894	10.3457	1.50787	0.64401	2.34138	0.0192126	0.044199	AC018809.1
									ENSG00000231160	15.7206	1.50897	0.459016	3.28741	0.00101113	0.00317092	KLF3-AS1
									ENSG00000274114	50.2454	1.50972	0.268632	5.62003	1.91e-08	1.14e-07	ALOX15P1
									ENSG00000268521	14.9129	1.51038	0.509971	2.96171	0.0030594	0.00866052	VN1R83P
									ENSG00000147162	12960.4	1.51168	0.0455354	33.1978	1.16e-241	7.49e-238	OGT
									ENSG00000087076	114.868	1.51195	0.192837	7.84059	4.48e-15	4.85e-14	HSD17B14
									ENSG00000262585	24.7524	1.51271	0.350127	4.32047	1.56e-05	6.55e-05	LINC01979
									ENSG00000272054	24.9068	1.51306	0.390865	3.87106	0.000108363	0.000402352	AC007390.2
									ENSG00000244124	15.5246	1.51363	0.501887	3.01588	0.00256231	0.00738239	ATP1B3-AS1
									ENSG00000272305	12.7184	1.51386	0.559329	2.70656	0.0067985	0.0177286	AC096887.1
									ENSG00000260279	64.4106	1.51454	0.303401	4.99188	5.98e-07	3.03e-06	AC137932.1
									ENSG00000235530	15.6109	1.51542	0.485935	3.11857	0.00181731	0.00540168	AC087294.1
									ENSG00000129682	71.5725	1.51546	0.193324	7.839	4.54e-15	4.91e-14	FGF13
									ENSG00000236204	22.329	1.51574	0.435937	3.47697	0.000507122	0.00168648	LINC01376
									ENSG00000151612	115.354	1.51601	0.334406	4.53344	5.8e-06	2.6e-05	ZNF827
									ENSG00000107611	26.9288	1.51655	0.371099	4.08664	4.38e-05	0.000173253	CUBN
									ENSG00000152661	177.59	1.51726	0.291084	5.21244	1.86e-07	1e-06	GJA1
									ENSG00000187066	21.1924	1.51771	0.452454	3.35439	0.000795412	0.00254872	TMEM262
									ENSG00000107518	52.1425	1.51891	0.390556	3.88909	0.000100622	0.000375595	ATRNL1
									ENSG00000275895	21.9393	1.51934	0.6063	2.50591	0.0122135	0.0297508	U2AF1L5
									ENSG00000273154	15.0649	1.52013	0.502699	3.02393	0.00249517	0.00720737	AL121845.3
									ENSG00000006025	30.7351	1.52021	0.457261	3.3246	0.000885447	0.00280736	OSBPL7
									ENSG00000138669	36.0378	1.52023	0.342998	4.4322	9.33e-06	4.07e-05	PRKG2
									ENSG00000140092	49.1536	1.52056	0.524695	2.89799	0.00375557	0.0104452	FBLN5
									ENSG00000181097	31.772	1.52067	0.393586	3.86363	0.000111715	0.000413318	AC105219.1
									ENSG00000135406	112.493	1.52103	0.189577	8.02327	1.03e-15	1.16e-14	PRPH
									ENSG00000254233	6.86753	1.52113	0.633953	2.39943	0.0164206	0.0385843	LINC02365
									ENSG00000204175	33.8823	1.52245	0.335589	4.53664	5.72e-06	2.56e-05	GPRIN2
									ENSG00000233602	8.61938	1.52346	0.619886	2.45764	0.0139854	0.0335248	ERI3-IT1
									ENSG00000093072	59.5525	1.52442	0.244279	6.24047	4.36e-10	3.07e-09	ADA2
									ENSG00000154265	405.8	1.52539	0.0992083	15.3757	2.38e-53	1.8e-51	ABCA5
									ENSG00000237883	16.875	1.52581	0.556483	2.74189	0.00610872	0.0161262	DGUOK-AS1
									ENSG00000235527	15.5648	1.52637	0.47238	3.23125	0.00123252	0.00378685	HIPK1-AS1
									ENSG00000269994	42.2929	1.52713	0.408799	3.73565	0.00018723	0.000668092	AL513318.2
									ENSG00000266236	7.48775	1.5279	0.629422	2.42747	0.0152044	0.0360699	NARF-IT1
									ENSG00000214021	352.624	1.52808	0.125323	12.1932	3.38e-34	1.11e-32	TTLL3
									ENSG00000185615	73.3952	1.52818	0.301652	5.06604	4.06e-07	2.1e-06	PDIA2
									ENSG00000179292	14.3168	1.52902	0.577135	2.64932	0.0080653	0.0206497	TMEM151A
									ENSG00000175265	1836.76	1.52974	0.0886135	17.263	8.93e-67	1.12e-64	GOLGA8A
									ENSG00000164406	56.8338	1.52976	0.281313	5.43793	5.39e-08	3.07e-07	LEAP2
									ENSG00000105219	19.8035	1.53042	0.464773	3.29283	0.000991843	0.00311686	CNTD2
									ENSG00000232874	9.2055	1.53054	0.580026	2.63874	0.00832138	0.0212027	AC080129.2
									ENSG00000163491	20.7981	1.53096	0.528414	2.89726	0.00376435	0.010464	NEK10
									ENSG00000205885	19.1102	1.53125	0.397005	3.85702	0.000114778	0.00042368	C1RL-AS1
									ENSG00000280399	19.7379	1.53145	0.372889	4.10699	4.01e-05	0.000159482	AC022497.1
									ENSG00000139193	11.2322	1.53273	0.519804	2.94867	0.00319144	0.00899889	CD27
									ENSG00000260778	18.3885	1.53323	0.457749	3.3495	0.000809577	0.00259155	AC009065.4
									ENSG00000279155	11.8813	1.5345	0.569289	2.69548	0.00702878	0.018263	AC233300.1
									ENSG00000167619	50.0862	1.53485	0.37281	4.11699	3.84e-05	0.000153025	TMEM145
									ENSG00000081985	38.6677	1.53493	0.405292	3.78722	0.000152341	0.000551111	IL12RB2
									ENSG00000260337	30.3272	1.53506	0.366972	4.18304	2.88e-05	0.00011681	AC091544.4
									ENSG00000224903	10.6883	1.53515	0.665452	2.30693	0.0210588	0.0478009	AC005534.1
									ENSG00000198879	361.662	1.53536	0.13123	11.6998	1.28e-31	3.73e-30	SFMBT2
									ENSG00000267128	37.669	1.5355	0.339118	4.52791	5.96e-06	2.66e-05	RNF157-AS1
									ENSG00000259345	20.5095	1.5376	0.38126	4.03296	5.51e-05	0.000214886	AC013652.1
									ENSG00000168461	199.649	1.53824	0.205744	7.47647	7.63e-14	7.52e-13	RAB31
									ENSG00000144908	17.9601	1.5383	0.603039	2.55092	0.010744	0.0265455	ALDH1L1
									ENSG00000260618	41.3219	1.53853	0.308462	4.98775	6.11e-07	3.09e-06	AC025917.1
									ENSG00000167123	433.533	1.53856	0.148799	10.3399	4.65e-25	9.52e-24	CERCAM
									ENSG00000186399	15.5366	1.54054	0.512139	3.00805	0.00262927	0.00755097	GOLGA8R
									ENSG00000176597	78.6436	1.5416	0.342	4.50761	6.56e-06	2.92e-05	B3GNT5
									ENSG00000232352	63.4315	1.54163	0.235642	6.54225	6.06e-11	4.64e-10	SEMA3B-AS1
									ENSG00000263272	121.029	1.54167	0.17592	8.76348	1.89e-18	2.58e-17	AC004148.1
									ENSG00000230183	19.1013	1.54182	0.656821	2.3474	0.0189049	0.0436033	CNOT6LP1
									ENSG00000250337	161.306	1.54261	0.245811	6.27559	3.48e-10	2.48e-09	PURPL
									ENSG00000215493	46.4749	1.54269	0.279495	5.51957	3.4e-08	1.98e-07	AC007731.1
									ENSG00000241343	264.114	1.54322	0.127678	12.0869	1.24e-33	3.96e-32	RPL36A
									ENSG00000119866	164.615	1.54346	0.364324	4.23652	2.27e-05	9.36e-05	BCL11A
									ENSG00000126231	25.3365	1.5435	0.355571	4.34092	1.42e-05	6.01e-05	PROZ
									ENSG00000162931	50.128	1.5446	0.288619	5.3517	8.71e-08	4.85e-07	TRIM17
									ENSG00000225526	19.346	1.54492	0.48377	3.19349	0.00140563	0.00427311	MKRN2OS
									ENSG00000233930	72.7477	1.54524	0.200998	7.68784	1.5e-14	1.56e-13	KRTAP5-AS1
									ENSG00000269834	210.128	1.54537	0.126072	12.2578	1.53e-34	5.12e-33	ZNF528-AS1
									ENSG00000233585	12.1357	1.5455	0.582346	2.65392	0.00795628	0.0204029	AC231533.2
									ENSG00000207523	10.7776	1.54571	0.577707	2.67559	0.00745988	0.019248	SNORA66
									ENSG00000279649	29.0067	1.54579	0.423073	3.65371	0.000258475	0.000902434	AC020978.9
									ENSG00000260316	11.2754	1.5462	0.507377	3.04743	0.00230809	0.00671865	AL008727.1
									ENSG00000240288	21.6521	1.54708	0.423275	3.65502	0.000257159	0.00089808	GHRLOS
									ENSG00000182916	15.3275	1.54728	0.513971	3.01043	0.00260874	0.00750031	TCEAL7
									ENSG00000105971	81.3574	1.5494	0.356706	4.34363	1.4e-05	5.94e-05	CAV2
									ENSG00000267571	20.0494	1.5498	0.46474	3.33477	0.000853684	0.00271763	AC104532.2
									ENSG00000167680	84.7134	1.55005	0.253686	6.1101	9.96e-10	6.78e-09	SEMA6B
									ENSG00000077943	110.165	1.55109	0.450229	3.44512	0.000570815	0.0018802	ITGA8
									ENSG00000213906	103.874	1.55234	0.217722	7.12994	1e-12	9.03e-12	LTB4R2
									ENSG00000255176	6.28836	1.55323	0.656148	2.3672	0.0179234	0.0416509	AP000941.1
									ENSG00000270061	10.058	1.55431	0.618424	2.51334	0.0119595	0.0291788	AC068790.5
									ENSG00000258458	17.4667	1.55517	0.490982	3.16746	0.00153777	0.00463946	AL160314.2
									ENSG00000241769	91.5459	1.55529	0.236794	6.56811	5.1e-11	3.94e-10	LINC00893
									ENSG00000271732	12.1747	1.55577	0.612243	2.54111	0.0110502	0.0272139	AL137798.1
									ENSG00000136457	12.1337	1.55744	0.625122	2.49142	0.0127233	0.0308534	CHAD
									ENSG00000232502	28.0085	1.5576	0.423138	3.68106	0.000232264	0.00081631	AC073464.1
									ENSG00000243107	14.7808	1.55869	0.457605	3.40618	0.000658787	0.00214724	AC000120.1
									ENSG00000272894	57.3353	1.55889	0.271765	5.73616	9.68e-09	5.94e-08	AC004982.2
									ENSG00000235772	8.94459	1.55966	0.653803	2.38551	0.0170553	0.0399055	AP001625.2
									ENSG00000122367	18.126	1.56015	0.458038	3.40615	0.000658849	0.00214724	LDB3
									ENSG00000259972	63.1225	1.56034	0.270425	5.76994	7.93e-09	4.91e-08	AC009120.2
									ENSG00000162526	39.8195	1.56219	0.307898	5.07373	3.9e-07	2.02e-06	TSSK3
									ENSG00000182771	69.4213	1.56239	0.412537	3.78726	0.000152317	0.000551102	GRID1
[truncated: 1,950 more rows]
