# Supplementary material for: Clinical and molecular significance of the RNA m6A methyltransferase complex in prostate cancer
Source: Frontiers journal article supplement (doi:10.3389/fgene.2022.1096071), 2023-01-12
Supplement: Data_Sheet_2.zip [file Supplementary_table_4.xlsx]

## Sheet: Sheet1
Supplementary Table 4. Enriched KEGG pathways with DEGs with shMETTL3 knockdown in LNCaP:C4-2 cells.
A) Significantly (FDR<0.05) enriched KEGG pathways with DEGs with shMETTL3 knockdown.
Enriched KEGG pathways with genes down-regulated with shMETTL3
geneSet	Description	Size	Expect	EnrichmentRatio	pValue	FDR
hsa01100	Metabolic pathways	1305	120.38	1.678	4.44e-16	1.46e-13
hsa03030	DNA replication	36	3.3209	5.4202	3.49e-10	5.74e-08
hsa04110	Cell cycle	124	11.439	2.7975	4.68e-08	5.1307e-06
hsa01200	Carbon metabolism	116	10.701	2.5232	4.5987e-06	0.00037824
hsa03410	Base excision repair	33	3.0442	3.6134	0.00011053	0.0062543
hsa00480	Glutathione metabolism	56	5.1659	2.9037	0.00011406	0.0062543
hsa00100	Steroid biosynthesis	19	1.7527	4.5644	0.00015134	0.0071129
hsa00020	Citrate cycle (TCA cycle)	30	2.7674	3.6134	0.00022715	0.0093417
hsa03460	Fanconi anemia pathway	54	4.9814	2.8105	0.00027885	0.0094426
hsa01212	Fatty acid metabolism	48	4.4279	2.9359	0.00028701	0.0094426
hsa05166	Human T-cell leukemia virus 1 infection	255	23.523	1.7004	0.00053315	0.015946
hsa01230	Biosynthesis of amino acids	75	6.9186	2.3126	0.0011086	0.028126
hsa00062	Fatty acid elongation	30	2.7674	3.2521	0.0011114	0.028126
hsa00240	Pyrimidine metabolism	101	9.317	2.0393	0.0019534	0.043302
hsa00983	Drug metabolism	79	7.2876	2.1955	0.0019742	0.043302
hsa01040	Biosynthesis of unsaturated fatty acids	27	2.4907	3.212	0.0022847	0.046978
Enriched KEGG pathways with genes up-regulated with shMETTL3
hsa05200	Pathways in cancer	526	53.03	1.5274	4.778e-05	0.01572
hsa04360	Axon guidance	175	17.643	1.9271	0.00012018	0.016946
hsa05202	Transcriptional misregulation in cancer	186	18.752	1.8665	0.00018567	0.016946
hsa05412	Arrhythmogenic right ventricular cardiomyopathy (ARVC)	72	7.2588	2.4797	0.00020603	0.016946
hsa05217	Basal cell carcinoma	63	6.3515	2.5191	0.00037851	0.021014
hsa04512	ECM-receptor interaction	82	8.267	2.2983	0.0003985	0.021014
hsa05410	Hypertrophic cardiomyopathy (HCM)	83	8.3678	2.2706	0.00046914	0.021014
hsa04921	Oxytocin signaling pathway	152	15.324	1.8924	0.00051098	0.021014
hsa04550	Signaling pathways regulating pluripotency of stem cells	139	14.014	1.9267	0.00058935	0.021544
hsa04510	Focal adhesion	199	20.063	1.7445	0.00069682	0.022925
hsa04022	cGMP-PKG signaling pathway	163	16.433	1.8256	0.00076981	0.023024
hsa04726	Serotonergic synapse	115	11.594	1.9838	0.00096845	0.026552
hsa04713	Circadian entrainment	96	9.6784	2.0665	0.0012035	0.029397
hsa04974	Protein digestion and absorption	90	9.0735	2.094	0.0013403	0.029397
hsa05414	Dilated cardiomyopathy (DCM)	90	9.0735	2.094	0.0013403	0.029397
hsa04350	TGF-beta signaling pathway	84	8.4686	2.1255	0.001486	0.030556
hsa04725	Cholinergic synapse	112	11.291	1.9484	0.0015829	0.030635
hsa04540	Gap junction	88	8.8719	2.0289	0.002573	0.047029
