# Supplementary material for: Clinical and molecular significance of the RNA m6A methyltransferase complex in prostate cancer
Source: Frontiers journal article supplement (doi:10.3389/fgene.2022.1096071), 2023-01-12
Supplement: Data_Sheet_2.zip [file Supplementary_table_5.xlsx]

## Sheet: Sheet1
Supplementary Table 5. Significant (dPSI ≥5% and FDR <0.05) differential splicing events with siSCR vs shMETTL3 treatment in LNCaP:C4-2 cells.
A) Significant splicing events in shSCR vs shMETTL3 in LNCaP:C4-2																										B) Significantly (FDR<0.05) enriched KEGG pathways with all spliced genes with shMETTL3 knockdown in LNCaP:C4-2 cells.
Significant alternative 5' splice site (A5SS) events																										Significant alternative 5' splice site (A5SS) events
ID	GeneID	geneSymbol	chr	strand	longExonStart_0base	longExonEnd	shortES	shortEE	flankingES	flankingEE	ID	IC_SAMPLE_1	SC_SAMPLE_1	IC_SAMPLE_2	SC_SAMPLE_2	IncFormLen	SkipFormLen	PValue	FDR	IncLevel1	IncLevel2	IncLevelDifference	AbsdPSI			geneSet	description	size	expect	enrichmentRatio	pValue	FDR
19334	ENSG00000198546	ZNF511	10	+	133311715	133311956	133311715	133311946	133312787	133313158	19334	2,2,1	0,0,0	0,0,0	1,1,3	149	139	4.60187e-13	8.37169e-10	1.0,1.0,1.0	0.0,0.0,0.0	1	100			hsa03010	Ribosome	153	5.3875	3.5267	1.5205e-06	0.00050024
35003	ENSG00000259673	IQCH-AS1	15	-	67442192	67442407	67442284	67442407	67430320	67430400	35003	2,6,3	0,2,0	0,0,0	2,1,1	231	139	1.9944e-12	2.72115e-09	1.0,0.644,1.0	0.0,0.0,0.0	0.881	88.1			hsa03410	Base excision repair	33	1.162	6.0241	0.00012059	0.019838
304	ENSG00000123297	TSFM	12	+	57782802	57783030	57782802	57782877	57783109	57783283	304	9,10,5	2,2,0	1,0,0	13,5,6	292	139	1.80411e-13	3.82903e-10	0.682,0.704,1.0	0.035,0.0,0.0	0.784	78.4			hsa03040	Spliceosome	134	4.7184	2.9671	0.00024761	0.022325
7020	ENSG00000183010	PYCR1	17	-	81937210	81937257	81937241	81937257	81936747	81936861	7020	1,10,2	0,2,0	1,1,1	3,6,6	170	139	2.92298e-09	1.80108e-06	1.0,0.803,1.0	0.214,0.12,0.12	0.783	78.3			hsa01230	Biosynthesis of amino acids	75	2.6409	3.7866	0.00027143	0.022325
28986	ENSG00000241015	TPM3P9	19	+	53433592	53433757	53433592	53433750	53439827	53439933	28986	0,0,0	1,4,4	1,1,2	2,0,0	146	139	2.12495e-05	0.00238264	0.0,0.0,0.0	0.323,1.0,1.0	-0.774	77.4			Significant skipped exon (SE) events
30933	ENSG00000180098	TRNAU1AP	1	+	28553246	28553311	28553246	28553307	28553639	28553737	30933	2,0,0	2,4,1	4,2,1	1,0,0	143	139	1.03042e-08	5.0468e-06	0.493,0.0,0.0	0.795,1.0,1.0	-0.767	76.7			geneSet	description	size	expect	enrichmentRatio	pValue	FDR
39399	ENSG00000107186	MPDZ	9	-	13279326	13279564	13279563	13279564	13250299	13250372	39399	2,1,1	6,7,9	7,1,4	3,0,0	376	139	3.14114e-05	0.00318835	0.11,0.05,0.039	0.463,1.0,1.0	-0.755	75.5			hsa03040	Spliceosome	134	11.464	2.6168	6.66e-07	0.00021901
20619	ENSG00000236305	RP11-126L15.4	7	-	100852459	100852616	100852464	100852616	100837313	100837579	20619	5,12,1	2,6,0	0,1,0	5,8,13	144	139	3.06753e-10	2.66339e-07	0.707,0.659,1.0	0.0,0.108,0.0	0.753	75.3			hsa01100	Metabolic pathways	1305	111.65	1.3525	2.1514e-05	0.003539
2479	ENSG00000166401	SERPINB8	18	+	63970028	63970248	63970028	63970187	63978298	63978476	2479	0,0,0	4,2,3	1,6,2	2,0,0	200	139	3.45036e-09	2.05959e-06	0.0,0.0,0.0	0.258,1.0,1.0	-0.753	75.3			Significant mutually exclusive exon (MXE) events
37777	ENSG00000144857	BOC	3	+	113216186	113216278	113216186	113216274	113249721	113249899	37777	2,5,4	0,2,2	0,0,1	1,3,7	143	139	2.58669e-08	1.05127e-05	1.0,0.708,0.66	0.0,0.0,0.122	0.749	74.9			geneSet	description	size	expect	enrichmentRatio	pValue	FDR
20617	ENSG00000236305	RP11-126L15.4	7	-	100851873	100852055	100851975	100852055	100837313	100837579	20617	8,3,1	0,2,0	2,0,1	6,3,5	241	139	4.03948e-07	0.000107916	1.0,0.464,1.0	0.161,0.0,0.103	0.733	73.3			hsa01100	Metabolic pathways	1305	44.904	1.648	3.4756e-06	0.0011435
15208	ENSG00000160741	CRTC2	1	-	153957999	153958123	153958060	153958123	153955150	153955166	15208	5,1,4	0,1,0	1,0,0	2,4,2	200	139	1.47159e-10	1.33855e-07	1.0,0.41,1.0	0.258,0.0,0.0	0.717	71.7			hsa04932	Non-alcoholic fatty liver disease (NAFLD)	149	5.1269	2.9257	0.00017534	0.028843
6692	ENSG00000141002	TCF25	16	+	89910211	89910356	89910211	89910351	89910590	89910663	6692	0,0,0	4,4,3	2,2,2	1,2,0	144	139	2.7796e-07	7.86585e-05	0.0,0.0,0.0	0.659,0.491,1.0	-0.717	71.7			Significant retained intron (RI) events
107	ENSG00000099875	MKNK2	19	-	2051054	2051244	2051217	2051244	2050800	2050947	107	3,11,5	0,0,0	3,2,0	1,2,1	302	139	0.000329443	0.0165819	1.0,1.0,1.0	0.58,0.315,0.0	0.702	70.2			geneSet	description	size	expect	enrichmentRatio	pValue	FDR
2386	ENSG00000182899	RPL35A	3	+	197950205	197950422	197950205	197950266	197950935	197950978	2386	8,12,8	0,0,2	1,2,0	4,1,3	295	139	1.31413e-08	5.90631e-06	1.0,1.0,0.653	0.105,0.485,0.0	0.688	68.8			hsa03040	Spliceosome	134	5.1849	3.8574	1.75e-07	5.7603e-05
35037	ENSG00000205085	FAM71F2	7	+	128682963	128683309	128682963	128683255	128683822	128684246	35037	2,3,0	1,4,4	1,1,1	0,0,0	193	139	3.83475e-10	3.18476e-07	0.59,0.351,0.0	1.0,1.0,1.0	-0.686	68.6			hsa00514	Other types of O-glycan biosynthesis	22	0.85125	7.0484	0.00014069	0.023144
34079	ENSG00000139514	SLC7A1	13	-	29595619	29595688	29595621	29595688	29553760	29553860	34079	0,0,0	5,2,2	2,5,1	2,4,0	141	139	1.68337e-07	5.18575e-05	0.0,0.0,0.0	0.496,0.552,1.0	-0.683	68.3
14454	ENSG00000228624	RP3-399L15.3	6	+	113991892	113992018	113991892	113992014	113993342	113993487	14454	0,2,0	1,5,4	2,2,4	0,4,0	143	139	6.37333e-06	0.000979403	0.0,0.28,0.0	1.0,0.327,1.0	-0.682	68.2
37871	ENSG00000165219	GAPVD1	9	+	125346818	125346995	125346818	125346935	125349389	125349519	37871	1,6,2	0,0,0	3,0,2	3,1,1	199	139	9.41163e-05	0.00699518	1.0,1.0,1.0	0.411,0.0,0.583	0.669	66.9
33151	ENSG00000134109	EDEM1	3	+	5211119	5211199	5211119	5211190	5213318	5213522	33151	0,0,0	3,8,2	2,2,0	0,0,1	148	139	2.10302e-06	0.000424273	0.0,0.0,0.0	1.0,1.0,0.0	-0.667	66.7
1824	ENSG00000264269	RP11-15F12.1	18	+	49039999	49040171	49039999	49040069	49048127	49048474	1824	2,3,3	0,0,0	5,1,4	3,7,3	241	139	1.79275e-11	1.95682e-08	1.0,1.0,1.0	0.49,0.076,0.435	0.666	66.6
392	ENSG00000088340	FER1L4	20	-	35576045	35576283	35576166	35576283	35565099	35565227	392	0,1,2	8,5,3	1,3,4	0,3,0	260	139	6.24507e-05	0.00514182	0.0,0.097,0.263	1.0,0.348,1.0	-0.663	66.3
40078	ENSG00000165487	MICU2	13	-	21495734	21495842	21495782	21495842	21495168	21495318	40078	2,1,4	0,0,0	1,1,3	1,2,4	187	139	2.02358e-08	8.31254e-06	1.0,1.0,1.0	0.426,0.271,0.358	0.648	64.8
35390	ENSG00000229404	LINC00858	10	+	84292191	84292378	84292191	84292327	84293245	84294659	35390	5,3,6	0,0,0	4,4,1	5,4,2	190	139	1.36888e-10	1.2755e-07	1.0,1.0,1.0	0.369,0.422,0.268	0.647	64.7
35379	ENSG00000132199	ENOSF1	18	-	712449	712662	712467	712662	706469	706578	35379	10,8,3	6,4,0	0,2,0	3,4,4	157	139	3.94161e-06	0.000693924	0.596,0.639,1.0	0.0,0.307,0.0	0.643	64.3
11663	ENSG00000164398	ACSL6	5	-	131974757	131974949	131974892	131974949	131973265	131973400	11663	6,2,0	4,6,2	11,3,4	0,0,2	274	139	7.90465e-06	0.00115702	0.432,0.145,0.0	1.0,1.0,0.504	-0.642	64.2
24021	ENSG00000100632	ERH	14	-	69397285	69397432	69397302	69397432	69394824	69394912	24021	2,2,9	6,0,0	0,2,0	6,4,2	156	139	4.58276e-06	0.00076452	0.229,1.0,1.0	0.0,0.308,0.0	0.64	64
21297	ENSG00000074582	BCS1L	2	+	218659736	218659928	218659736	218659811	218660306	218660475	21297	13,10,6	0,1,0	3,5,0	1,6,1	256	139	1.00859e-06	0.000233522	1.0,0.844,1.0	0.62,0.312,0.0	0.637	63.7
26747	ENSG00000134253	TRIM45	1	-	117121600	117121792	117121605	117121792	117120713	117120901	26747	2,0,2	0,1,0	0,0,1	3,1,10	144	139	1.41838e-06	0.000309637	1.0,0.0,1.0	0.0,0.0,0.088	0.637	63.7
26368	ENSG00000135253	KCP	7	-	128878557	128879623	128879521	128879623	128874523	128874610	26368	19,22,9	0,0,0	6,6,5	2,1,1	1103	139	0.000153604	0.00997821	1.0,1.0,1.0	0.274,0.431,0.387	0.636	63.6
24920	ENSG00000135596	MICAL1	6	-	109455605	109455742	109455718	109455742	109453938	109454239	24920	2,1,0	15,17,5	0,1,3	1,0,0	252	139	0.000196999	0.0118297	0.069,0.031,0.0	0.0,1.0,1.0	-0.633	63.3
5124	ENSG00000234741	GAS5	1	-	173868683	173868882	173868753	173868882	173867980	173868009	5124	7,14,8	10,13,9	6,4,1	0,0,0	209	139	4.00352e-09	2.31737e-06	0.318,0.417,0.372	1.0,1.0,1.0	-0.631	63.1
16262	ENSG00000152795	HNRNPDL	4	-	82428749	82428886	82428761	82428886	82428280	82428446	16262	3,1,6	0,0,0	1,1,0	7,0,2	151	139	2.4727e-07	7.1564e-05	1.0,1.0,1.0	0.116,1.0,0.0	0.628	62.8
2879	ENSG00000106305	AIMP2	7	+	6011489	6011555	6011489	6011543	6015145	6015352	2879	2,1,8	0,1,1	0,0,1	2,3,1	151	139	9.63016e-09	4.77793e-06	1.0,0.479,0.88	0.0,0.0,0.479	0.627	62.7
26272	ENSG00000105373	GLTSCR2	19	+	47755783	47756005	47755783	47755987	47756527	47756604	26272	5,2,0	6,9,4	4,4,1	4,0,0	157	139	0.00122441	0.0417644	0.425,0.164,0.0	0.47,1.0,1.0	-0.627	62.7
5633	ENSG00000224870	RP4-758J18.2	1	+	1399521	1399693	1399521	1399689	1400604	1401087	5633	6,1,4	1,0,0	0,2,1	4,1,2	143	139	3.76521e-07	0.000102016	0.854,1.0,1.0	0.0,0.66,0.327	0.622	62.2
30725	ENSG00000224023	FLJ37035	10	-	125719348	125719460	125719421	125719460	125718904	125718981	30725	2,1,2	1,0,0	2,0,2	3,3,2	212	139	5.70113e-06	0.000903736	0.567,1.0,1.0	0.304,0.0,0.396	0.622	62.2
30314	ENSG00000205726	ITSN1	21	+	33829005	33829168	33829005	33829050	33829623	33829745	30314	6,2,5	0,4,0	0,2,0	1,2,1	257	139	3.01475e-05	0.00307948	1.0,0.213,1.0	0.0,0.351,0.0	0.621	62.1
39449	ENSG00000156261	CCT8	21	-	29073281	29073432	29073389	29073432	29070246	29070337	39449	12,17,22	6,1,0	8,3,0	6,10,1	247	139	5.02697e-05	0.00451663	0.53,0.905,1.0	0.429,0.144,0.0	0.621	62.1
35385	ENSG00000132199	ENOSF1	18	-	712377	712630	712467	712630	706469	706578	35385	5,7,5	6,4,0	0,0,0	3,4,4	229	139	1.04653e-08	5.06084e-06	0.336,0.515,1.0	0.0,0.0,0.0	0.617	61.7
28366	ENSG00000105278	ZFR2	19	-	3868789	3869032	3868964	3869032	3851812	3852614	28366	21,22,21	3,7,6	3,0,0	11,11,14	314	139	1.11022e-16	4.71265e-13	0.756,0.582,0.608	0.108,0.0,0.0	0.613	61.3
14453	ENSG00000228624	RP3-399L15.3	6	+	113991892	113992120	113991892	113992018	113993342	113993487	14453	5,10,5	0,2,0	1,1,6	2,2,4	241	139	1.28056e-05	0.00165275	1.0,0.743,1.0	0.224,0.224,0.464	0.61	61
1041	ENSG00000267395	AC074212.6	19	+	45770995	45771182	45770995	45771143	45771489	45771883	1041	0,2,0	4,1,2	1,4,2	1,0,0	178	139	5.47491e-08	2.05057e-05	0.0,0.61,0.0	0.438,1.0,1.0	-0.609	60.9
19572	ENSG00000163069	SGCB	4	-	52031851	52031961	52031864	52031961	52029677	52029863	19572	3,7,8	0,0,1	2,5,0	6,1,1	152	139	5.05925e-05	0.00451663	1.0,1.0,0.88	0.234,0.821,0.0	0.608	60.8
8128	ENSG00000147905	ZCCHC7	9	+	37120538	37120627	37120538	37120623	37302187	37302231	8128	0,0,0	2,1,1	3,3,1	1,1,2	143	139	9.96071e-08	3.34844e-05	0.0,0.0,0.0	0.745,0.745,0.327	-0.606	60.6
35386	ENSG00000132199	ENOSF1	18	-	712359	712544	712467	712544	706469	706578	35386	5,7,5	6,4,0	0,0,0	3,4,4	247	139	1.89395e-08	7.86462e-06	0.319,0.496,1.0	0.0,0.0,0.0	0.605	60.5
2387	ENSG00000182899	RPL35A	3	+	197950205	197950431	197950205	197950266	197950935	197950978	2387	11,16,8	0,0,2	3,3,0	4,1,3	304	139	8.94144e-07	0.000212168	1.0,1.0,0.647	0.255,0.578,0.0	0.605	60.5
22087	ENSG00000074603	DPP8	15	-	65455711	65455841	65455754	65455841	65454262	65454415	22087	8,0,1	0,4,3	15,6,7	0,0,0	182	139	7.55639e-06	0.00112764	1.0,0.0,0.203	1.0,1.0,1.0	-0.599	59.9
23903	ENSG00000157593	SLC35B2	6	-	44256333	44256492	44256337	44256492	44254095	44255644	23903	0,0,0	1,1,1	2,5,3	2,2,2	143	139	9.28727e-10	6.5704e-07	0.0,0.0,0.0	0.493,0.708,0.593	-0.598	59.8
7438	ENSG00000105339	DENND3	8	+	141117277	141117364	141117277	141117332	141136508	141136791	7438	2,2,0	1,3,1	4,1,2	1,0,0	171	139	8.54427e-05	0.00651531	0.619,0.351,0.0	0.765,1.0,1.0	-0.598	59.8
25872	ENSG00000102967	DHODH	16	+	72015683	72015858	72015683	72015792	72017023	72017106	25872	2,5,2	0,1,0	0,1,0	1,0,1	205	139	0.000706164	0.0285477	1.0,0.772,1.0	0.0,1.0,0.0	0.591	59.1
18080	ENSG00000153391	INO80C	18	-	35497497	35497649	35497523	35497649	35480455	35480563	18080	2,1,4	1,3,5	2,1,2	0,0,0	165	139	4.6128e-09	2.59151e-06	0.628,0.219,0.403	1.0,1.0,1.0	-0.583	58.3
2478	ENSG00000166401	SERPINB8	18	+	63970118	63970248	63970118	63970170	63978298	63978476	2478	1,0,0	4,2,1	1,6,2	0,4,2	217	139	5.58309e-05	0.00479305	0.138,0.0,0.0	1.0,0.49,0.39	-0.581	58.1
31836	ENSG00000078304	PPP2R5C	14	+	101824013	101824190	101824013	101824169	101856685	101856885	31836	2,0,0	5,6,4	6,0,1	0,3,0	160	139	0.000339814	0.0169499	0.258,0.0,0.0	1.0,0.0,1.0	-0.581	58.1
28053	ENSG00000196151	WDSUB1	2	-	159286427	159286552	159286535	159286552	159283035	159283093	28053	4,8,0	13,3,1	8,2,5	0,0,3	247	139	0.00099883	0.0360791	0.148,0.6,0.0	1.0,1.0,0.484	-0.579	57.9
6794	ENSG00000111669	TPI1	12	+	6868099	6868314	6868099	6868255	6868863	6868987	6794	3,6,3	0,0,2	2,0,6	2,1,7	198	139	0.000119945	0.00830122	1.0,1.0,0.513	0.412,0.0,0.376	0.575	57.5
1631	ENSG00000204149	AGAP6	10	+	49987164	49987271	49987164	49987234	49988750	49988938	1631	8,3,5	5,1,0	0,3,0	10,2,1	176	139	8.81732e-05	0.00663087	0.558,0.703,1.0	0.0,0.542,0.0	0.573	57.3
21127	ENSG00000102897	LYRM1	16	+	20901103	20901321	20901103	20901124	20915555	20915714	21127	16,19,7	0,1,0	4,0,1	0,2,2	336	139	3.39943e-05	0.00332144	1.0,0.887,1.0	1.0,0.0,0.171	0.572	57.2
14206	ENSG00000106028	SSBP1	7	+	141738602	141738681	141738602	141738619	141739123	141739193	14206	8,10,7	0,0,2	0,1,0	2,0,1	201	139	1.49624e-05	0.001868	1.0,1.0,0.708	0.0,1.0,0.0	0.569	56.9
30911	ENSG00000164088	PPM1M	3	+	52246208	52246381	52246208	52246314	52246694	52246812	30911	18,13,2	6,2,0	5,7,4	14,12,6	206	139	1.5323e-05	0.00190679	0.669,0.814,1.0	0.194,0.282,0.31	0.566	56.6
23965	ENSG00000125434	SLC25A35	17	-	8290596	8290678	8290602	8290678	8289853	8289984	23965	3,9,5	3,3,2	1,0,0	3,2,4	145	139	2.54505e-07	7.31041e-05	0.489,0.742,0.706	0.242,0.0,0.0	0.565	56.5
27677	ENSG00000095485	CWF19L1	10	-	100267434	100267623	100267525	100267623	100261978	100262063	27677	7,0,3	1,4,7	4,7,1	1,0,0	230	139	2.85073e-06	0.000539141	0.809,0.0,0.206	0.707,1.0,1.0	-0.564	56.4
9538	ENSG00000197885	NKIRAS1	3	-	23916864	23916952	23916932	23916952	23911328	23911450	9538	15,5,5	2,0,0	6,4,3	2,9,6	207	139	8.13078e-07	0.000196595	0.834,1.0,1.0	0.668,0.23,0.251	0.562	56.2
10842	ENSG00000101181	MTG2	20	+	62188789	62188854	62188789	62188805	62193415	62193624	10842	3,9,3	3,0,2	0,1,0	4,2,5	188	139	2.28395e-07	6.76384e-05	0.425,1.0,0.526	0.0,0.27,0.0	0.56	56
6231	ENSG00000241404	EGFL8	6	+	32166909	32167036	32166909	32167005	32167146	32167257	6231	4,6,4	8,5,0	0,1,0	1,7,2	170	139	4.33952e-06	0.000736811	0.29,0.495,1.0	0.0,0.105,0.0	0.56	56
29894	ENSG00000267858	MZF1-AS1	19	+	58568912	58568999	58568912	58568995	58570383	58570584	29894	1,3,0	0,0,2	0,0,1	3,2,2	143	139	0.000264115	0.014465	1.0,1.0,0.0	0.0,0.0,0.327	0.558	55.8
20085	ENSG00000102125	TAZ	X	+	154413206	154413352	154413206	154413339	154413481	154413567	20085	5,7,5	8,0,4	0,1,0	5,3,1	152	139	1.80529e-06	0.000376871	0.364,1.0,0.533	0.0,0.234,0.0	0.554	55.4
21600	ENSG00000139926	FRMD6	14	+	51701055	51701159	51701055	51701135	51702511	51702588	21600	5,7,2	3,1,2	0,0,3	2,5,8	163	139	2.43824e-05	0.00267879	0.587,0.857,0.46	0.0,0.0,0.242	0.554	55.4
38342	ENSG00000100823	APEX1	14	+	20455239	20455283	20455239	20455270	20455577	20455703	38342	0,2,3	4,1,0	0,0,0	2,1,4	152	139	0.000847379	0.0322756	0.0,0.647,1.0	0.0,0.0,0.0	0.549	54.9
11639	ENSG00000278610	RP11-455P21.3	1	+	222815063	222815171	222815063	222815078	222827427	222827601	11639	1,2,5	0,0,0	3,2,0	0,2,3	232	139	8.21639e-05	0.00630303	1.0,1.0,1.0	1.0,0.375,0.0	0.542	54.2
16023	ENSG00000104164	BLOC1S6	15	+	45597879	45597996	45597879	45597891	45603099	45603187	16023	3,5,7	1,0,6	3,1,0	5,3,3	244	139	0.0012376	0.0419894	0.631,1.0,0.399	0.255,0.16,0.0	0.538	53.8
21298	ENSG00000074582	BCS1L	2	+	218659713	218659886	218659713	218659811	218660306	218660475	21298	3,2,4	0,1,0	3,4,0	1,6,1	214	139	2.02921e-05	0.00232799	1.0,0.565,1.0	0.661,0.302,0.0	0.534	53.4
31808	ENSG00000145741	BTF3	5	+	73499133	73499201	73499133	73499184	73502487	73502600	31808	3,6,3	1,2,0	1,3,0	6,1,1	156	139	0.00122408	0.0417644	0.728,0.728,1.0	0.129,0.728,0.0	0.533	53.3
27084	ENSG00000163867	ZMYM6	1	-	34990183	34990311	34990218	34990311	34986979	34988935	27084	4,1,1	0,3,3	3,12,1	0,0,0	174	139	4.57879e-05	0.00418478	1.0,0.21,0.21	1.0,1.0,1.0	-0.527	52.7
3954	ENSG00000125503	PPP1R12C	19	-	55094342	55094435	55094354	55094435	55093015	55093233	3954	10,3,4	7,6,3	5,6,9	0,0,0	151	139	6.62123e-10	5.05902e-07	0.568,0.315,0.551	1.0,1.0,1.0	-0.522	52.2
35925	ENSG00000110768	GTF2H1	11	+	18325946	18326153	18325946	18326019	18333059	18333228	35925	5,7,6	3,4,3	3,2,2	0,0,0	273	139	8.1963e-08	2.82093e-05	0.459,0.471,0.505	1.0,1.0,1.0	-0.522	52.2
18483	ENSG00000147475	ERLIN2	8	+	37737007	37737185	37737007	37737114	37737907	37738029	18483	6,10,3	1,0,0	2,6,0	4,0,2	210	139	0.000169071	0.0106061	0.799,1.0,1.0	0.249,1.0,0.0	0.517	51.7
27217	ENSG00000196549	MME	3	+	155148549	155148650	155148549	155148639	155160389	155160448	27217	0,0,0	3,1,2	4,1,3	2,2,2	150	139	4.41372e-08	1.7032e-05	0.0,0.0,0.0	0.65,0.317,0.582	-0.516	51.6
19710	ENSG00000182180	MRPS16	10	-	73252238	73252404	73252258	73252404	73251762	73252023	19710	7,16,2	0,0,3	2,1,1	2,6,3	159	139	1.36198e-05	0.00172863	1.0,1.0,0.368	0.466,0.127,0.226	0.516	51.6
18481	ENSG00000147475	ERLIN2	8	+	37737007	37737172	37737007	37737114	37737907	37738029	18481	6,6,4	1,0,0	2,5,0	4,0,2	197	139	0.000199115	0.0119042	0.809,1.0,1.0	0.261,1.0,0.0	0.516	51.6
26351	ENSG00000130725	UBE2M	19	-	58556890	58556930	58556891	58556930	58556686	58556796	26351	2,2,0	2,10,1	3,2,5	0,2,2	140	139	0.00150822	0.0485824	0.498,0.166,0.0	1.0,0.498,0.713	-0.516	51.6
29060	ENSG00000119335	SET	9	+	128683423	128683513	128683423	128683446	128683779	128683991	29060	6,8,3	1,1,1	3,1,2	7,4,2	206	139	1.81209e-05	0.00214326	0.802,0.844,0.669	0.224,0.144,0.403	0.515	51.5
27735	ENSG00000155438	NIFK	2	-	121736480	121736621	121736532	121736621	121735612	121735750	27735	5,4,4	2,4,0	0,1,2	4,3,3	191	139	0.000384916	0.0187764	0.645,0.421,1.0	0.0,0.195,0.327	0.515	51.5
4808	ENSG00000136925	TSTD2	9	-	97627305	97627612	97627397	97627612	97625680	97625777	4808	6,7,5	3,9,2	7,2,3	0,0,0	231	139	6.54045e-10	5.05902e-07	0.546,0.319,0.601	1.0,1.0,1.0	-0.511	51.1
14450	ENSG00000228624	RP3-399L15.3	6	+	113991892	113992187	113991892	113992018	113993342	113993487	14450	6,10,9	0,2,0	6,1,6	2,2,4	308	139	5.86979e-05	0.00493929	1.0,0.693,1.0	0.575,0.184,0.404	0.51	51
5462	ENSG00000183336	BOLA2	16	-	29450111	29450276	29450181	29450276	29446801	29446922	5462	3,1,5	0,0,0	3,1,7	7,2,0	209	139	1.62893e-05	0.00199455	1.0,1.0,1.0	0.222,0.25,1.0	0.509	50.9
18764	ENSG00000012061	ERCC1	19	-	45423704	45423938	45423822	45423938	45423272	45423381	18764	2,10,4	0,9,4	0,2,1	5,9,5	257	139	0.000516509	0.0228646	1.0,0.375,0.351	0.0,0.107,0.098	0.507	50.7
39451	ENSG00000156261	CCT8	21	-	29073205	29073432	29073389	29073432	29070246	29070337	39451	18,22,35	6,1,0	14,4,1	6,10,1	323	139	5.75901e-05	0.00488915	0.564,0.904,1.0	0.501,0.147,0.301	0.506	50.6
16088	ENSG00000144785	RP11-977G19.10	12	-	56286481	56286645	56286496	56286645	56285915	56286023	16088	6,2,3	0,2,0	3,0,4	1,2,12	154	139	0.000116741	0.00818323	1.0,0.474,1.0	0.73,0.0,0.231	0.504	50.4
26008	ENSG00000111652	COPS7A	12	+	6724286	6724409	6724286	6724390	6724613	6724818	26008	0,1,0	5,6,3	4,2,2	10,0,3	158	139	7.80464e-05	0.00607252	0.0,0.128,0.0	0.26,1.0,0.37	-0.501	50.1
7444	ENSG00000072134	EPN2	17	+	19276396	19276548	19276396	19276538	19281954	19282077	7444	2,11,5	1,3,2	4,2,3	13,9,9	149	139	4.02392e-06	0.000695592	0.651,0.774,0.7	0.223,0.172,0.237	0.498	49.8
6798	ENSG00000111669	TPI1	12	+	6868217	6868323	6868217	6868255	6868863	6868987	6798	3,8,3	0,0,2	4,0,8	2,1,7	207	139	0.000553951	0.0240348	1.0,1.0,0.502	0.573,0.0,0.434	0.498	49.8
37088	ENSG00000171858	RPS21	20	+	62388318	62388369	62388318	62388363	62388456	62388519	37088	0,6,3	2,2,1	0,0,0	1,2,1	145	139	5.58832e-06	0.00089702	0.0,0.742,0.742	0.0,0.0,0.0	0.495	49.5
24940	ENSG00000107798	LIPA	10	-	89414406	89414557	89414542	89414557	89412873	89412922	24940	5,4,4	0,0,1	1,7,1	2,1,2	275	139	5.3268e-05	0.00464611	1.0,1.0,0.669	0.202,0.78,0.202	0.495	49.5
28054	ENSG00000196151	WDSUB1	2	-	159286359	159286592	159286535	159286592	159283035	159283093	28054	6,5,3	13,3,1	10,7,12	0,0,3	315	139	4.38098e-05	0.0040623	0.169,0.424,0.57	1.0,1.0,0.638	-0.492	49.2
4788	ENSG00000150316	CWC15	11	-	94973490	94973533	94973499	94973533	94972054	94972193	4788	0,2,0	3,4,2	1,2,4	1,1,2	148	139	9.67816e-05	0.00709664	0.0,0.32,0.0	0.484,0.653,0.653	-0.49	49
9812	ENSG00000100031	GGT1	22	+	24603234	24603527	24603234	24603460	24607953	24608023	9812	6,8,2	6,2,2	6,10,5	0,0,0	206	139	1.21483e-08	5.58079e-06	0.403,0.73,0.403	1.0,1.0,1.0	-0.488	48.8
23255	ENSG00000254840	RP11-574M7.1	11	+	50320366	50320590	50320366	50320506	50320913	50320998	23255	5,11,4	2,3,8	1,2,4	0,0,0	223	139	1.09291e-08	5.21906e-06	0.609,0.696,0.238	1.0,1.0,1.0	-0.486	48.6
24494	ENSG00000241258	CRCP	7	+	66114825	66115067	66114825	66114914	66127703	66127740	24494	3,4,6	1,0,1	1,2,4	4,1,5	292	139	3.20189e-05	0.00321184	0.588,1.0,0.741	0.106,0.488,0.276	0.486	48.6
8866	ENSG00000136051	KIAA1033	12	+	105155061	105155230	105155061	105155177	105156725	105156792	8866	2,7,3	10,0,3	1,3,1	0,0,0	192	139	3.53898e-06	0.000643807	0.126,1.0,0.42	1.0,1.0,1.0	-0.485	48.5
27770	ENSG00000146416	AIG1	6	+	143060495	143060737	143060495	143060653	143060946	143061066	27770	7,4,2	5,6,6	2,3,2	0,0,2	223	139	0.000681119	0.0278894	0.466,0.294,0.172	1.0,1.0,0.384	-0.484	48.4
27767	ENSG00000146416	AIG1	6	+	143334077	143334225	143334077	143334136	143339638	143340304	27767	13,14,21	2,4,6	1,7,12	5,11,15	228	139	1.35898e-05	0.00172863	0.798,0.681,0.681	0.109,0.28,0.328	0.481	48.1
28242	ENSG00000134809	TIMM10	11	-	57530344	57530538	57530522	57530538	57530118	57530234	28242	14,12,6	0,0,0	2,10,12	2,2,4	317	139	8.1488e-08	2.82093e-05	1.0,1.0,1.0	0.305,0.687,0.568	0.48	48
6799	ENSG00000111669	TPI1	12	+	6868217	6868318	6868217	6868255	6868863	6868987	6799	2,6,1	0,0,2	2,0,7	2,1,7	202	139	0.00130621	0.0436964	1.0,1.0,0.256	0.408,0.0,0.408	0.48	48
27042	ENSG00000117472	TSPAN1	1	+	46184959	46185117	46184959	46185109	46185224	46185308	27042	5,3,5	0,0,1	0,2,1	6,3,0	147	139	5.31196e-06	0.000869586	1.0,1.0,0.825	0.0,0.387,1.0	0.479	47.9
34370	ENSG00000250608	RP11-933H2.4	3	-	131381281	131381475	131381332	131381475	131376611	131376707	34370	6,2,1	1,1,4	1,2,4	0,0,0	190	139	5.52504e-05	0.00476463	0.814,0.594,0.155	1.0,1.0,1.0	-0.479	47.9
5651	ENSG00000164237	CMBL	5	-	10302638	10302795	10302755	10302795	10290547	10290781	5651	7,2,3	2,0,0	13,6,0	1,6,2	256	139	0.00108067	0.0383331	0.655,1.0,1.0	0.876,0.352,0.0	0.476	47.6
9537	ENSG00000197885	NKIRAS1	3	-	23916800	23916952	23916932	23916952	23911328	23911450	9537	21,13,9	2,0,0	9,7,9	2,9,6	271	139	6.00123e-07	0.000150832	0.843,1.0,1.0	0.698,0.285,0.435	0.475	47.5
31306	ENSG00000144355	DLX1	2	+	172084739	172084885	172084739	172084881	172085311	172085990	31306	7,5,4	3,3,5	1,3,0	8,10,6	143	139	5.51475e-05	0.00476463	0.694,0.618,0.437	0.108,0.226,0.0	0.472	47.2
2367	ENSG00000184470	TXNRD2	22	-	19937978	19938179	19937982	19938179	19931029	19931098	2367	7,2,1	4,5,0	1,0,0	1,3,4	143	139	9.29566e-05	0.00692245	0.63,0.28,1.0	0.493,0.0,0.0	0.472	47.2
38434	ENSG00000079156	OSBPL6	2	+	178216770	178216941	178216770	178216854	178284926	178285121	38434	1,4,0	4,2,3	5,1,4	0,1,1	226	139	6.92839e-05	0.00556062	0.133,0.552,0.0	1.0,0.381,0.711	-0.469	46.9
32865	ENSG00000063245	EPN1	19	+	55675970	55676150	55675970	55676054	55678526	55678855	32865	8,2,2	0,1,0	2,0,5	1,5,2	235	139	6.21382e-06	0.000961079	1.0,0.542,1.0	0.542,0.0,0.597	0.468	46.8
23651	ENSG00000168003	SLC3A2	11	+	62881697	62881758	62881697	62881718	62881892	62882070	23651	13,9,4	4,3,3	3,0,1	4,5,4	179	139	0.000128047	0.00873533	0.716,0.7,0.509	0.368,0.0,0.163	0.465	46.5
6540	ENSG00000132698	RAB25	1	+	156065910	156066005	156065910	156065931	156068269	156068400	6540	4,3,1	0,0,1	0,0,2	1,2,0	213	139	0.000197249	0.0118297	1.0,1.0,0.395	0.0,0.0,1.0	0.465	46.5
16465	ENSG00000125691	RPL23	17	-	38853301	38853428	38853377	38853428	38853055	38853105	16465	13,9,8	0,0,0	3,5,0	0,2,5	215	139	7.65267e-05	0.00597863	1.0,1.0,1.0	1.0,0.618,0.0	0.461	46.1
2134	ENSG00000111817	DSE	6	+	116254172	116254383	116254172	116254295	116257215	116257337	2134	1,9,7	2,2,4	4,10,8	0,1,0	227	139	1.5891e-05	0.00195834	0.234,0.734,0.517	1.0,0.86,1.0	-0.458	45.8
1873	ENSG00000219200	RNASEK	17	+	7013318	7013555	7013318	7013535	7013665	7013742	1873	8,9,7	17,2,7	0,0,3	7,5,12	159	139	3.00666e-05	0.00307948	0.291,0.797,0.466	0.0,0.0,0.179	0.458	45.8
32179	ENSG00000249392	RP11-725D20.1	4	-	59594324	59594479	59594419	59594479	59574297	59574358	32179	0,2,0	2,1,3	2,1,2	1,1,0	234	139	7.24189e-05	0.00575486	0.0,0.543,0.0	0.543,0.373,1.0	-0.458	45.8
33661	ENSG00000137098	SPAG8	9	-	35811181	35812001	35811923	35812001	35810882	35811057	33661	15,6,7	0,8,1	17,22,10	0,0,0	881	139	1.90425e-05	0.00220449	1.0,0.106,0.525	1.0,1.0,1.0	-0.456	45.6
33662	ENSG00000137098	SPAG8	9	-	35811756	35812001	35811923	35812001	35810882	35811057	33662	3,1,3	0,8,1	7,7,3	0,0,0	306	139	6.01201e-05	0.00502575	1.0,0.054,0.577	1.0,1.0,1.0	-0.456	45.6
21626	ENSG00000128000	ZNF780B	19	-	40055971	40056106	40056033	40056106	40050323	40050377	21626	4,4,1	3,3,1	8,4,1	2,0,0	201	139	0.000224042	0.0130275	0.48,0.48,0.409	0.734,1.0,1.0	-0.455	45.5
24525	ENSG00000213983	AP1G2	14	-	23563184	23563302	23563199	23563302	23562503	23562593	24525	3,3,4	13,6,6	2,3,3	1,0,2	154	139	0.00126149	0.0424605	0.172,0.311,0.376	0.644,1.0,0.575	-0.453	45.3
624	ENSG00000121022	COPS5	8	-	67061845	67062029	67061853	67062029	67061291	67061422	624	12,3,10	4,2,4	1,1,1	4,2,5	147	139	4.72081e-05	0.00430427	0.739,0.586,0.703	0.191,0.321,0.159	0.452	45.2
8406	ENSG00000157181	C1orf27	1	+	186398953	186399050	186398953	186399043	186406082	186406268	8406	2,3,1	2,3,5	1,3,1	1,0,0	146	139	1.71888e-05	0.00205851	0.488,0.488,0.16	0.488,1.0,1.0	-0.451	45.1
20621	ENSG00000141956	PRDM15	21	-	41879269	41879473	41879273	41879473	41860326	41860372	20621	0,0,0	1,7,1	6,1,0	1,1,1	143	139	0.000228143	0.0132057	0.0,0.0,0.0	0.854,0.493,0.0	-0.449	44.9
25034	ENSG00000137103	TMEM8B	9	+	35845707	35845885	35845707	35845829	35845974	35846068	25034	3,7,9	1,4,5	2,0,1	6,2,2	195	139	0.000236498	0.0135218	0.681,0.555,0.562	0.192,0.0,0.263	0.448	44.8
8064	ENSG00000162813	BPNT1	1	-	220089643	220089833	220089817	220089833	220073966	220074071	8064	14,8,4	5,5,2	16,6,7	2,0,0	313	139	2.63481e-05	0.00284391	0.554,0.415,0.47	0.78,1.0,1.0	-0.447	44.7
27803	ENSG00000131469	RPL27	17	+	42998435	42998565	42998435	42998532	42998748	42998825	27803	2,2,4	2,2,1	6,4,8	0,0,0	172	139	0.000664275	0.0274943	0.447,0.447,0.764	1.0,1.0,1.0	-0.447	44.7
17435	ENSG00000256591	RP11-286N22.8	11	+	61438003	61438120	61438003	61438080	61445940	61446231	17435	1,5,1	1,1,3	0,0,1	5,1,7	179	139	5.27146e-05	0.00461893	0.437,0.795,0.206	0.0,0.0,0.1	0.446	44.6
38316	ENSG00000232936	RP11-80H5.2	10	+	89645281	89645457	89645281	89645450	89648922	89648998	38316	1,1,3	3,2,2	1,1,3	1,0,0	146	139	3.33001e-05	0.00329577	0.241,0.323,0.588	0.488,1.0,1.0	-0.445	44.5
3319	ENSG00000167747	C19orf48	19	-	50799271	50799357	50799293	50799357	50798703	50798782	3319	10,10,10	0,0,3	10,6,5	8,5,7	161	139	4.0965e-06	0.000704949	1.0,1.0,0.742	0.519,0.509,0.381	0.444	44.4
28946	ENSG00000226383	AC093375.1	2	-	156024465	156024613	156024469	156024613	156022671	156022817	28946	5,0,5	1,2,1	0,0,1	1,2,2	143	139	3.20318e-05	0.00321184	0.829,0.0,0.829	0.0,0.0,0.327	0.444	44.4
37534	ENSG00000124177	CHD6	20	-	41414821	41415065	41414873	41415065	41413323	41413515	37534	1,5,8	2,3,1	2,3,1	0,0,0	191	139	0.000121065	0.00836358	0.267,0.548,0.853	1.0,1.0,1.0	-0.444	44.4
2919	ENSG00000181751	C5orf30	5	+	103259035	103259277	103259035	103259181	103265907	103265997	2919	5,5,3	0,6,0	1,0,0	0,5,1	235	139	5.12505e-05	0.00454275	1.0,0.33,1.0	1.0,0.0,0.0	0.443	44.3
17729	ENSG00000249916	CTD-2280E9.1	5	-	122383425	122383568	122383469	122383568	122371705	122371777	17729	0,1,1	1,2,0	1,2,2	0,0,1	183	139	0.0014559	0.0476605	0.0,0.275,1.0	1.0,1.0,0.603	-0.443	44.3
3916	ENSG00000166228	PCBD1	10	-	70887102	70887209	70887119	70887209	70885797	70885929	3916	0,0,0	1,2,5	2,6,1	3,3,2	156	139	1.02217e-07	3.36638e-05	0.0,0.0,0.0	0.373,0.641,0.308	-0.441	44.1
9964	ENSG00000120658	ENOX1	13	-	43667441	43667544	43667478	43667544	43630594	43630653	9964	3,3,1	2,2,3	4,2,1	0,1,0	176	139	1.13888e-05	0.00152662	0.542,0.542,0.208	1.0,0.612,1.0	-0.44	44
38315	ENSG00000232936	RP11-80H5.2	10	+	89645441	89645499	89645441	89645450	89648922	89648998	38315	0,5,7	3,2,2	3,3,2	1,0,0	188	139	3.66973e-05	0.00349613	0.0,0.649,0.721	0.689,1.0,1.0	-0.44	44
18847	ENSG00000158717	RNF166	16	-	88700546	88700681	88700617	88700681	88699619	88699732	18847	1,2,1	0,1,0	3,0,1	0,2,2	210	139	0.000568729	0.0244951	1.0,0.57,1.0	1.0,0.0,0.249	0.44	44
12083	ENSG00000104852	SNRNP70	19	+	49102113	49102185	49102113	49102173	49104633	49104735	12083	0,1,2	5,6,6	2,3,4	4,2,1	151	139	0.000598422	0.0253735	0.0,0.133,0.235	0.315,0.58,0.786	-0.438	43.8
18712	ENSG00000188372	ZP3	7	+	76415014	76415144	76415014	76415044	76415220	76415224	18712	6,1,3	4,2,0	4,2,1	0,0,0	239	139	0.000212078	0.0125684	0.466,0.225,1.0	1.0,1.0,1.0	-0.436	43.6
12632	ENSG00000139726	DENR	12	+	122754410	122754497	122754410	122754493	122762186	122762206	12632	0,1,2	9,4,11	2,3,2	1,1,6	143	139	0.000977821	0.0355092	0.0,0.195,0.15	0.66,0.745,0.245	-0.435	43.5
14174	ENSG00000106028	SSBP1	7	+	141738395	141738619	141738395	141738600	141739123	141739193	14174	0,0,2	3,1,1	2,1,1	0,1,1	158	139	0.000118462	0.00824337	0.0,0.0,0.638	1.0,0.468,0.468	-0.433	43.3
38458	ENSG00000179262	RAD23A	19	+	12948270	12948513	12948270	12948358	12948685	12948813	38458	27,40,26	27,33,14	33,18,17	3,2,2	294	139	1.83129e-08	7.68801e-06	0.321,0.364,0.468	0.839,0.81,0.801	-0.432	43.2
39067	ENSG00000138279	ANXA7	10	-	73408175	73408407	73408194	73408407	73400802	73400857	39067	0,0,0	5,1,1	1,5,2	2,2,4	158	139	4.50657e-07	0.000118734	0.0,0.0,0.0	0.305,0.687,0.305	-0.432	43.2
20875	ENSG00000213753	CENPBD1P1	19	+	58573502	58573725	58573502	58573669	58581244	58581646	20875	2,13,4	0,1,0	1,1,2	3,0,2	195	139	0.000287726	0.0150989	1.0,0.903,1.0	0.192,1.0,0.416	0.432	43.2
20002	ENSG00000011258	MBTD1	17	-	51259798	51259941	51259834	51259941	51225007	51225209	20002	3,12,6	6,7,5	1,0,0	12,7,7	175	139	8.54463e-09	4.35241e-06	0.284,0.577,0.488	0.062,0.0,0.0	0.429	42.9
30478	ENSG00000164050	PLXNB1	3	-	48413423	48413537	48413457	48413537	48413068	48413169	30478	9,5,8	1,0,0	9,5,2	4,4,2	173	139	2.29221e-06	0.000458478	0.879,1.0,1.0	0.644,0.501,0.446	0.429	42.9
13215	ENSG00000136682	CBWD2	2	+	113457064	113457216	113457064	113457204	113460672	113460719	13215	2,2,0	6,2,1	1,1,0	0,0,1	151	139	0.00145966	0.0477428	0.235,0.479,0.0	1.0,1.0,0.0	-0.429	42.9
31428	ENSG00000163635	ATXN7	3	+	63864559	63864999	63864559	63864688	63898398	63898497	31428	5,5,1	2,4,0	2,2,1	0,0,0	450	139	1.04892e-05	0.0014274	0.436,0.279,1.0	1.0,1.0,1.0	-0.428	42.8
1397	ENSG00000105402	NAPA	19	-	47492950	47493174	47493118	47493174	47492014	47492119	1397	17,36,22	0,1,0	7,12,4	3,0,10	307	139	7.48666e-06	0.00112162	1.0,0.942,1.0	0.514,1.0,0.153	0.425	42.5
25629	ENSG00000132341	RAN	12	+	130872583	130872628	130872583	130872617	130872835	130872920	25629	2,6,9	0,1,0	10,2,2	2,2,5	150	139	1.76059e-05	0.00209532	1.0,0.848,1.0	0.822,0.481,0.27	0.425	42.5
14386	ENSG00000198918	RPL39	X	-	119787185	119787384	119787280	119787384	119786503	119786732	14386	1,3,3	1,2,3	2,3,2	0,2,0	234	139	0.00139503	0.0459831	0.373,0.471,0.373	1.0,0.471,1.0	-0.418	41.8
18223	ENSG00000135424	ITGA7	12	-	55700565	55701154	55700898	55701154	55699869	55699989	18223	17,3,5	1,0,1	1,6,1	2,0,5	472	139	0.00022634	0.0131212	0.834,1.0,0.596	0.128,1.0,0.056	0.415	41.5
6614	ENSG00000204628	GNB2L1	5	-	181238983	181239177	181238991	181239177	181238098	181238239	6614	8,5,8	1,0,0	6,2,3	2,2,4	147	139	7.98527e-06	0.00116436	0.883,1.0,1.0	0.739,0.486,0.415	0.414	41.4
34450	ENSG00000204623	ZNRD1-AS1	6	-	30061078	30061184	30061104	30061184	30060740	30060995	34450	2,4,2	3,1,1	3,6,3	0,0,0	165	139	0.000992176	0.035894	0.36,0.771,0.628	1.0,1.0,1.0	-0.414	41.4
21303	ENSG00000074582	BCS1L	2	+	218659716	218659928	218659716	218659743	218660306	218660475	21303	15,10,8	4,3,3	5,5,0	7,6,2	324	139	0.00109372	0.0386166	0.617,0.588,0.534	0.235,0.263,0.0	0.414	41.4
16217	ENSG00000165678	GHITM	10	+	84139501	84139742	84139501	84139577	84141461	84141628	16217	18,17,19	4,10,7	4,5,5	18,11,12	304	139	3.22834e-07	8.80945e-05	0.673,0.437,0.554	0.092,0.172,0.16	0.413	41.3
35359	ENSG00000140943	MBTPS1	16	-	84075525	84075656	84075554	84075656	84074596	84074741	35359	0,1,8	4,3,0	1,2,1	0,0,1	168	139	0.000216209	0.012727	0.0,0.216,1.0	1.0,1.0,0.453	-0.412	41.2
8238	ENSG00000119929	CUTC	10	+	99732280	99732418	99732280	99732356	99736245	99736317	8238	5,12,5	5,6,5	5,17,5	1,2,0	201	139	8.23879e-05	0.00630754	0.409,0.58,0.409	0.776,0.855,1.0	-0.411	41.1
41081	ENSG00000147403	RPL10	X	+	154398889	154399037	154398889	154398998	154399337	154399396	41081	8,9,5	0,0,0	3,11,1	1,5,1	178	139	1.00482e-05	0.0013959	1.0,1.0,1.0	0.701,0.632,0.438	0.41	41
8673	ENSG00000205084	TMEM231	16	-	75542554	75542683	75542601	75542683	75540008	75540065	8673	4,1,1	3,0,2	2,3,2	0,0,0	186	139	0.00113176	0.0395938	0.499,1.0,0.272	1.0,1.0,1.0	-0.41	41
17749	ENSG00000084072	PPIE	1	+	39745374	39748767	39745374	39745561	39748902	39749088	17749	36,38,23	2,3,0	24,6,10	0,0,0	3345	139	8.62462e-05	0.00655042	0.428,0.345,1.0	1.0,1.0,1.0	-0.409	40.9
17195	ENSG00000119408	NEK6	9	+	124286439	124286592	124286439	124286490	124292848	124293013	17195	4,1,4	0,0,0	2,6,6	2,1,2	241	139	0.0010418	0.0371807	1.0,1.0,1.0	0.366,0.776,0.634	0.408	40.8
32991	ENSG00000067208	EVI5	1	-	92703736	92703921	92703840	92703921	92703394	92703619	32991	0,1,0	2,0,1	2,2,1	0,0,2	243	139	8.69599e-06	0.00123499	0.0,1.0,0.0	1.0,1.0,0.222	-0.407	40.7
27704	ENSG00000149532	CPSF7	11	-	61429840	61429920	61429886	61429920	61429181	61429290	27704	8,18,13	0,3,1	13,9,3	5,5,6	185	139	0.000279444	0.01495	1.0,0.818,0.907	0.661,0.575,0.273	0.405	40.5
15890	ENSG00000250151	ARPC4-TTLL3	3	+	9826996	9827148	9826996	9827072	9828959	9829395	15890	5,8,7	1,4,2	1,0,2	2,4,1	215	139	0.000931834	0.0343618	0.764,0.564,0.694	0.244,0.0,0.564	0.405	40.5
6502	ENSG00000148153	INIP	9	-	112701787	112701880	112701831	112701880	112694130	112694233	6502	8,8,3	2,4,3	6,2,5	0,0,0	183	139	2.36706e-07	6.95605e-05	0.752,0.603,0.432	1.0,1.0,1.0	-0.404	40.4
34720	ENSG00000188186	LAMTOR4	7	+	100148993	100149205	100148993	100149037	100149498	100149565	34720	10,4,3	0,0,0	2,2,5	0,1,5	307	139	0.000237424	0.0135218	1.0,1.0,1.0	1.0,0.475,0.312	0.404	40.4
29048	ENSG00000129197	RPAIN	17	+	5425975	5426082	5425975	5426071	5428070	5428239	29048	10,24,13	12,5,1	4,3,3	13,14,2	150	139	0.000971054	0.0353307	0.436,0.816,0.923	0.222,0.166,0.582	0.402	40.2
32852	ENSG00000100479	POLE2	14	-	49679720	49679821	49679724	49679821	49674122	49674216	32852	2,1,0	9,10,3	6,3,6	11,8,1	143	139	0.000652899	0.0271707	0.178,0.089,0.0	0.346,0.267,0.854	-0.4	40
10118	ENSG00000102871	TRADD	16	-	67159673	67159898	67159824	67159898	67156509	67156668	10118	6,9,8	0,0,2	7,9,5	3,2,7	290	139	0.000107882	0.00774532	1.0,1.0,0.657	0.528,0.683,0.255	0.397	39.7
26504	ENSG00000185863	TMEM210	9	-	137171939	137172409	137172278	137172409	137171640	137171776	26504	17,8,13	2,3,7	23,35,24	0,1,2	478	139	4.47496e-05	0.00411944	0.712,0.437,0.351	1.0,0.911,0.777	-0.396	39.6
14421	ENSG00000163374	YY1AP1	1	-	155672271	155672731	155672520	155672731	155670400	155670464	14421	40,26,14	1,0,0	24,12,11	5,5,2	388	139	6.20686e-08	2.26624e-05	0.935,1.0,1.0	0.632,0.462,0.663	0.393	39.3
17812	ENSG00000204120	GIGYF2	2	+	232731121	232731258	232731121	232731234	232735154	232735238	17812	6,3,0	2,3,2	0,0,0	1,2,1	163	139	1.20153e-05	0.00157739	0.719,0.46,0.0	0.0,0.0,0.0	0.393	39.3
29425	ENSG00000180376	CCDC66	3	+	56566593	56566740	56566593	56566738	56566949	56567053	29425	3,11,7	5,1,4	1,0,1	3,1,1	141	139	0.00053845	0.0235359	0.372,0.916,0.633	0.247,0.0,0.496	0.393	39.3
23118	ENSG00000177225	PDDC1	11	-	773427	773629	773517	773629	772426	772521	23118	3,14,2	2,0,0	3,3,2	3,3,1	229	139	0.000244701	0.0137702	0.477,1.0,1.0	0.378,0.378,0.548	0.391	39.1
36495	ENSG00000233184	RP11-421L21.3	1	+	101075275	101075394	101075275	101075380	101077362	101077508	36495	1,1,0	2,7,1	4,2,2	4,1,2	153	139	0.000278711	0.01495	0.312,0.115,0.0	0.476,0.645,0.476	-0.39	39
29966	ENSG00000177565	TBL1XR1	3	-	177032192	177032340	177032226	177032340	177026372	177026474	29966	14,10,4	2,2,3	2,0,0	0,2,5	173	139	0.00113918	0.039817	0.849,0.801,0.517	1.0,0.0,0.0	0.389	38.9
10081	ENSG00000160087	UBE2J2	1	-	1262246	1262390	1262271	1262390	1257202	1257310	10081	17,3,1	3,3,2	1,7,7	0,0,2	164	139	0.00101134	0.0363122	0.828,0.459,0.298	1.0,1.0,0.748	-0.388	38.8
10951	ENSG00000121940	CLCC1	1	-	108963342	108963450	108963396	108963450	108950308	108950448	10951	11,5,8	5,3,8	10,17,6	1,2,0	193	139	3.3238e-05	0.00329577	0.613,0.546,0.419	0.878,0.86,1.0	-0.387	38.7
37615	ENSG00000067369	TP53BP1	15	-	43446753	43446914	43446765	43446914	43446386	43446590	37615	2,6,0	4,1,1	0,0,0	1,3,1	151	139	0.000142998	0.00946787	0.315,0.847,0.0	0.0,0.0,0.0	0.387	38.7
10559	ENSG00000148303	RPL7A	9	+	133348921	133349046	133348921	133349042	133349555	133349700	10559	3,10,7	4,8,1	7,6,16	0,0,0	143	139	7.84726e-08	2.77204e-05	0.422,0.549,0.872	1.0,1.0,1.0	-0.386	38.6
7824	ENSG00000101474	APMAP	20	-	24964220	24964416	24964374	24964416	24962924	24964022	7824	51,61,46	12,20,2	10,23,19	11,14,22	293	139	4.18858e-05	0.00391238	0.668,0.591,0.916	0.301,0.438,0.291	0.382	38.2
16086	ENSG00000144785	RP11-977G19.10	12	-	56286487	56286645	56286496	56286645	56285915	56286023	16086	14,5,1	0,2,0	3,3,4	1,2,12	148	139	3.01066e-05	0.00307948	1.0,0.701,1.0	0.738,0.585,0.238	0.38	38
29154	ENSG00000182109	RP11-69E11.4	1	-	39529015	39529164	39529054	39529164	39522279	39522505	29154	6,4,7	24,9,10	4,12,3	2,3,2	178	139	0.000216925	0.0127299	0.163,0.258,0.353	0.61,0.757,0.539	-0.377	37.7
17048	ENSG00000158106	RHPN1	8	+	143374099	143374297	143374099	143374293	143375552	143375668	17048	7,10,5	5,12,6	3,4,4	0,1,1	143	139	4.33741e-05	0.00403168	0.576,0.448,0.448	1.0,0.795,0.795	-0.373	37.3
6588	ENSG00000204628	GNB2L1	5	-	181243253	181243405	181243285	181243405	181242122	181242345	6588	6,7,3	6,2,3	1,2,1	11,3,7	171	139	0.000373542	0.0183189	0.448,0.74,0.448	0.069,0.351,0.104	0.371	37.1
25936	ENSG00000140025	EFCAB11	14	-	89954595	89954777	89954732	89954777	89953905	89954001	25936	4,4,3	1,4,1	3,5,5	0,1,0	276	139	7.2059e-06	0.00108381	0.668,0.335,0.602	1.0,0.716,1.0	-0.37	37
6487	ENSG00000260088	RP11-92G12.3	1	+	200669506	200669709	200669506	200669622	200690308	200690382	6487	3,7,3	0,3,4	1,2,3	0,0,0	226	139	1.84955e-05	0.00216081	1.0,0.589,0.316	1.0,1.0,1.0	-0.365	36.5
1201	ENSG00000116521	SCAMP3	1	-	155256641	155256791	155256655	155256791	155256240	155256419	1201	4,4,5	0,1,2	2,5,3	2,6,3	153	139	0.00132823	0.0443166	1.0,0.784,0.694	0.476,0.431,0.476	0.365	36.5
23032	ENSG00000138668	HNRNPD	4	-	82373923	82374155	82374118	82374155	82359470	82359639	23032	1,1,4	0,1,0	2,1,6	1,1,3	334	139	0.000183047	0.0112608	1.0,0.294,1.0	0.454,0.294,0.454	0.364	36.4
6936	ENSG00000196632	WNK3	X	-	54357798	54358005	54357806	54358005	54333177	54333792	6936	3,3,2	0,1,9	5,2,8	0,0,0	147	139	0.000451883	0.0207974	1.0,0.739,0.174	1.0,1.0,1.0	-0.362	36.2
17367	ENSG00000108587	GOSR1	17	+	30480855	30481030	30480855	30480947	30481142	30481257	17367	3,1,5	4,2,2	0,1,0	4,6,3	222	139	1.64316e-05	0.00200555	0.32,0.238,0.61	0.0,0.094,0.0	0.358	35.8
8243	ENSG00000119929	CUTC	10	+	99732219	99732405	99732219	99732356	99736245	99736317	8243	5,8,11	5,6,5	4,17,5	1,2,0	188	139	0.000176765	0.0109804	0.425,0.496,0.619	0.747,0.863,1.0	-0.357	35.7
24712	ENSG00000100889	PCK2	14	+	24095142	24095378	24095142	24095362	24096891	24097125	24712	4,3,1	6,4,0	6,2,3	1,0,0	155	139	3.3681e-05	0.00331057	0.374,0.402,1.0	0.843,1.0,1.0	-0.356	35.6
39485	ENSG00000138385	SSB	2	+	169799278	169799520	169799278	169799516	169800951	169801026	39485	4,1,3	3,15,2	0,0,2	4,2,11	143	139	0.00122615	0.0417711	0.564,0.061,0.593	0.0,0.0,0.15	0.356	35.6
17025	ENSG00000109118	PHF12	17	-	28925113	28925259	28925220	28925259	28924077	28924302	17025	12,3,5	1,0,0	2,4,1	3,2,0	246	139	0.000547251	0.0238116	0.871,1.0,1.0	0.274,0.531,1.0	0.355	35.5
33102	ENSG00000173638	SLC19A1	21	-	45541605	45541838	45541786	45541838	45537926	45538008	33102	11,6,6	1,0,1	6,10,20	4,5,5	320	139	0.000150307	0.00983248	0.827,1.0,0.723	0.395,0.465,0.635	0.352	35.2
2094	ENSG00000122035	RASL11A	13	+	27271176	27271204	27271176	27271178	27271483	27271540	2094	0,1,0	1,4,1	1,1,4	1,5,2	165	139	0.000634577	0.0266404	0.0,0.174,0.0	0.457,0.144,0.628	-0.352	35.2
29458	ENSG00000234665	RP11-262H14.3	9	-	62869076	62869304	62869189	62869304	62859071	62859193	29458	11,8,7	4,2,2	3,4,5	0,0,0	252	139	3.27915e-06	0.000605185	0.603,0.688,0.659	1.0,1.0,1.0	-0.35	35
40570	ENSG00000154277	UCHL1	4	+	41261753	41261923	41261753	41261800	41263224	41263291	40570	35,29,26	9,18,3	9,2,9	0,0,0	262	139	2.81117e-07	7.8967e-05	0.674,0.461,0.821	1.0,1.0,1.0	-0.348	34.8
24619	ENSG00000136824	SMC2	9	+	104094325	104094484	104094325	104094350	104095323	104095552	24619	6,8,16	0,0,0	15,13,12	2,4,5	273	139	6.22872e-08	2.26624e-05	1.0,1.0,1.0	0.792,0.623,0.55	0.345	34.5
29065	ENSG00000165661	QSOX2	9	-	136218930	136219164	136218993	136219164	136218678	136218808	29065	7,5,11	8,9,7	1,0,1	11,11,8	202	139	9.3447e-08	3.18746e-05	0.376,0.277,0.52	0.059,0.0,0.079	0.345	34.5
19739	ENSG00000153786	ZDHHC7	16	-	84988751	84988873	84988797	84988873	84981869	84981994	19739	18,8,4	7,5,5	7,11,7	2,1,0	185	139	0.000481813	0.0218607	0.659,0.546,0.375	0.724,0.892,1.0	-0.345	34.5
9826	ENSG00000150093	ITGB1	10	-	32936216	32936423	32936349	32936423	32935491	32935558	9826	5,5,11	1,0,0	5,6,9	4,2,2	272	139	1.37418e-05	0.00173833	0.719,1.0,1.0	0.39,0.605,0.697	0.342	34.2
8873	ENSG00000163013	FBXO41	2	-	73265783	73265966	73265892	73265966	73265281	73265640	8873	21,28,5	7,8,2	9,8,5	10,10,11	248	139	7.24573e-05	0.00575486	0.627,0.662,0.584	0.335,0.31,0.203	0.342	34.2
18991	ENSG00000106400	ZNHIT1	7	+	101218318	101221796	101218318	101218485	101222603	101222774	18991	663583407	35,26,11	166149161	42,24,35	3450	139	3.70814e-14	1.05429e-10	0.433,0.475,0.599	0.137,0.2,0.156	0.338	33.8
25764	ENSG00000196141	SPATS2L	2	+	200306259	200306418	200306259	200306292	200329430	200329480	25764	6,2,4	0,3,2	7,5,4	1,0,0	265	139	0.00114284	0.0398527	1.0,0.259,0.512	0.786,1.0,1.0	-0.338	33.8
22137	ENSG00000187325	TAF9B	X	-	78138782	78138924	78138842	78138924	78137748	78137883	22137	6,6,14	24,43,42	6,6,12	3,7,9	199	139	5.42082e-05	0.00470663	0.149,0.089,0.189	0.583,0.374,0.482	-0.337	33.7
16214	ENSG00000165678	GHITM	10	+	84139439	84139666	84139439	84139577	84141461	84141628	16214	6,10,8	4,10,7	1,2,3	18,11,12	228	139	4.46159e-06	0.000747571	0.478,0.379,0.411	0.033,0.1,0.132	0.334	33.4
13101	ENSG00000107185	RGP1	9	+	35749736	35749948	35749736	35749892	35750242	35750379	13101	0,0,3	1,1,0	2,1,0	0,0,1	195	139	9.57869e-05	0.00705077	0.0,0.0,1.0	1.0,1.0,0.0	-0.333	33.3
30259	ENSG00000189403	HMGB1	13	-	30464141	30464310	30464167	30464310	30463530	30463694	30259	65,59,44	19,13,8	17,25,13	25,18,13	165	139	3.90546e-07	0.000105071	0.742,0.793,0.822	0.364,0.539,0.457	0.332	33.2
2681	ENSG00000164403	SHROOM1	5	-	132824276	132824419	132824280	132824419	132823622	132823764	2681	0,0,1	1,3,0	3,2,2	1,6,0	143	139	0.000496515	0.0222895	0.0,0.0,1.0	0.745,0.245,1.0	-0.33	33
20786	ENSG00000109501	WFS1	4	+	6291196	6291362	6291196	6291354	6291916	6291997	20786	6,10,6	0,0,0	5,7,2	1,1,4	147	139	0.000733671	0.0292267	1.0,1.0,1.0	0.825,0.869,0.321	0.328	32.8
31204	ENSG00000090266	NDUFB2	7	+	140697223	140697471	140697223	140697391	140702865	140703010	31204	24,20,15	13,12,22	5,12,2	25,31,17	219	139	9.4249e-06	0.00132375	0.54,0.514,0.302	0.113,0.197,0.069	0.326	32.6
24041	ENSG00000134240	HMGCS2	1	-	119759769	119759989	119759863	119759989	119757272	119757438	24041	32,52,24	10,8,8	39,57,45	49,50,42	233	139	1.69678e-07	5.18575e-05	0.656,0.795,0.642	0.322,0.405,0.39	0.325	32.5
18907	ENSG00000240682	ISY1	3	-	129134827	129134938	129134831	129134938	129130549	129130636	18907	5,5,4	0,1,0	10,1,4	5,4,0	143	139	0.000266853	0.0145635	1.0,0.829,1.0	0.66,0.195,1.0	0.325	32.5
14397	ENSG00000232065	LINC01063	3	-	196632387	196632587	196632459	196632587	196631497	196631645	14397	36,48,33	2,16,1	22,42,11	13,17,10	211	139	0.000396937	0.0190266	0.922,0.664,0.956	0.527,0.619,0.42	0.325	32.5
21115	ENSG00000111641	NOP2	12	-	6568118	6568314	6568159	6568314	6567815	6567922	21115	6,5,1	4,4,0	2,6,4	0,0,0	180	139	3.15509e-06	0.00058797	0.537,0.491,1.0	1.0,1.0,1.0	-0.324	32.4
13532	ENSG00000139636	LMBR1L	12	-	49106544	49106746	49106616	49106746	49105923	49105957	13532	17,17,18	0,0,2	6,6,6	0,4,6	211	139	9.44337e-05	0.00700515	1.0,1.0,0.856	1.0,0.497,0.397	0.321	32.1
7083	ENSG00000186866	POFUT2	21	-	45283351	45283527	45283382	45283527	45282803	45283046	7083	5,15,6	2,0,0	6,1,3	4,1,1	170	139	0.000970827	0.0353307	0.671,1.0,1.0	0.551,0.45,0.71	0.32	32
31218	ENSG00000090266	NDUFB2	7	+	140697355	140697516	140697355	140697391	140702865	140703010	31218	33,34,27	13,12,22	9,18,9	25,31,17	264	139	4.4156e-06	0.000743125	0.572,0.599,0.393	0.159,0.234,0.218	0.318	31.8
1495	ENSG00000173207	CKS1B	1	+	154975538	154975739	154975538	154975608	154977986	154978114	1495	23,17,16	5,8,11	3,2,1	1,0,0	270	139	0.000114192	0.00806372	0.703,0.522,0.428	0.607,1.0,1.0	-0.318	31.8
24002	ENSG00000054267	ARID4B	1	-	235159993	235160174	235160144	235160174	235154880	235155112	24002	4,10,8	0,5,3	2,4,8	0,0,0	290	139	3.47288e-06	0.000634806	1.0,0.489,0.561	1.0,1.0,1.0	-0.317	31.7
7257	ENSG00000221947	XKR9	8	+	70669407	70669543	70669407	70669457	70706932	70707153	7257	8,6,11	3,5,0	12,5,6	0,0,0	225	139	1.32934e-05	0.00169848	0.622,0.426,1.0	1.0,1.0,1.0	-0.317	31.7
24782	ENSG00000133433	GSTT2B	22	-	23958854	23958980	23958886	23958980	23958550	23958701	24782	7,3,3	2,2,5	5,2,4	1,0,1	171	139	0.000669187	0.0276008	0.74,0.549,0.328	0.803,1.0,0.765	-0.317	31.7
13529	ENSG00000139636	LMBR1L	12	-	49106510	49106746	49106616	49106746	49105923	49105957	13529	24,22,24	0,0,2	8,9,6	0,4,6	245	139	7.62302e-05	0.00596767	1.0,1.0,0.872	1.0,0.561,0.362	0.316	31.6
29467	ENSG00000174652	ZNF266	19	-	9434064	9434235	9434074	9434235	9433692	9433783	29467	4,1,9	9,3,3	0,2,0	6,4,5	149	139	0.000216661	0.0127299	0.293,0.237,0.737	0.0,0.318,0.0	0.316	31.6
454	ENSG00000204576	PRR3	6	+	30561309	30561541	30561309	30561508	30561833	30562124	454	1,4,2	53,28,29	12,10,3	6,15,14	172	139	5.41575e-06	0.000876686	0.015,0.103,0.053	0.618,0.35,0.148	-0.315	31.5
7905	ENSG00000088451	TGDS	13	-	94596046	94596257	94596161	94596257	94593840	94593907	7905	13,6,11	1,0,0	18,11,4	1,6,2	254	139	5.32192e-05	0.00464611	0.877,1.0,1.0	0.908,0.501,0.523	0.315	31.5
6549	ENSG00000132698	RAB25	1	+	156066562	156066707	156066562	156066619	156068269	156068463	6549	12,27,8	8,8,8	3,9,3	2,0,0	227	139	0.000657962	0.0273219	0.479,0.674,0.38	0.479,1.0,1.0	-0.315	31.5
37817	ENSG00000153406	NMRAL1	16	-	4471260	4471449	4471313	4471449	4469354	4469465	37817	8,19,2	15,9,9	0,1,2	9,19,25	192	139	2.11009e-06	0.000424273	0.279,0.604,0.139	0.0,0.037,0.055	0.31	31
29961	ENSG00000235590	GNAS-AS1	20	-	58848756	58848917	58848878	58848917	58842432	58842545	29961	6,4,0	3,3,2	0,0,0	2,5,2	261	139	7.59118e-06	0.00112843	0.516,0.415,0.0	0.0,0.0,0.0	0.31	31
28229	ENSG00000185633	NDUFA4L2	12	-	57240558	57240703	57240678	57240703	57237804	57237913	28229	61,32,35	0,1,0	6,14,9	3,2,2	259	139	2.25689e-05	0.00250639	1.0,0.945,1.0	0.518,0.79,0.707	0.31	31
23652	ENSG00000168003	SLC3A2	11	+	62881667	62881753	62881667	62881718	62881892	62882070	23652	8,1,2	4,3,3	0,2,0	4,5,4	174	139	0.000193546	0.0117052	0.615,0.21,0.347	0.0,0.242,0.0	0.31	31
18092	ENSG00000170296	GABARAP	17	-	7241961	7242156	7242078	7242156	7241600	7241679	18092	9,9,1	11,3,3	1,2,0	9,10,7	256	139	6.48148e-05	0.00530218	0.308,0.62,0.153	0.057,0.098,0.0	0.309	30.9
36083	ENSG00000215472	RPL17-C18orf32	18	-	49491351	49491584	49491531	49491584	49490800	49490927	36083	154,112,91	52,49,24	42,67,87	6,3,2	319	139	1.12006e-08	5.28267e-06	0.563,0.499,0.623	0.753,0.907,0.95	-0.308	30.8
35358	ENSG00000120837	NFYB	12	-	104123383	104123423	104123387	104123423	104123225	104123278	35358	6,7,3	1,4,2	1,10,6	0,0,0	143	139	2.93809e-05	0.00305842	0.854,0.63,0.593	1.0,1.0,1.0	-0.308	30.8
2458	ENSG00000010361	FUZ	19	-	49812446	49812736	49812637	49812736	49812250	49812335	2458	12,11,13	1,7,1	2,4,1	0,0,0	330	139	4.33536e-06	0.000736811	0.835,0.398,0.846	1.0,1.0,1.0	-0.307	30.7
11158	ENSG00000177700	POLR2L	11	-	842425	842545	842458	842545	840261	840480	11158	18,16,10	3,0,0	14,34,11	14,3,7	172	139	0.000139988	0.009317	0.829,1.0,1.0	0.447,0.902,0.559	0.307	30.7
28110	ENSG00000134884	ARGLU1	13	-	106557519	106557651	106557558	106557651	106557047	106557131	28110	46,46,28	19,28,7	8,15,9	16,15,14	178	139	0.000293502	0.0153178	0.654,0.562,0.757	0.281,0.438,0.334	0.307	30.7
109	ENSG00000021826	CPS1	2	+	210519550	210519784	210519550	210519670	210556718	210556859	109	5,6,6	5,6,2	3,2,3	1,0,1	253	139	0.00153584	0.0492643	0.355,0.355,0.622	0.622,1.0,0.622	-0.304	30.4
35135	ENSG00000142794	NBPF3	1	+	21478143	21478307	21478143	21478196	21479348	21479400	35135	8,7,9	3,0,5	5,3,6	0,0,0	250	139	6.85629e-06	0.00104355	0.597,1.0,0.5	1.0,1.0,1.0	-0.301	30.1
21208	ENSG00000238098	ABCA17P	16	+	2345818	2345928	2345818	2345924	2361115	2361196	21208	1,3,7	3,9,3	0,2,0	6,5,4	143	139	0.000416299	0.0197318	0.245,0.245,0.694	0.0,0.28,0.0	0.301	30.1
39347	ENSG00000125967	NECAB3	20	-	33662126	33662241	33662211	33662241	33660258	33660395	39347	12,16,15	18,13,5	4,3,4	11,12,13	224	139	0.00106148	0.0377578	0.293,0.433,0.651	0.184,0.134,0.16	0.3	30
34705	ENSG00000104133	SPG11	15	-	44598564	44598679	44598634	44598679	44598353	44598373	34705	8,5,4	2,2,4	4,7,7	0,1,1	209	139	0.00048879	0.0220724	0.727,0.624,0.399	1.0,0.823,0.823	-0.299	29.9
25468	ENSG00000124333	VAMP7	X	+	155889457	155889633	155889457	155889612	155898111	155898249	25468	15,14,5	20,15,9	15,13,15	5,5,7	160	139	0.000736114	0.0292326	0.395,0.448,0.326	0.723,0.693,0.651	-0.299	29.9
16206	ENSG00000121310	ECHDC2	1	-	52921470	52921703	52921482	52921703	52913894	52914095	16206	5,6,1	6,3,3	1,1,0	4,3,2	151	139	0.000394553	0.0189361	0.434,0.648,0.235	0.187,0.235,0.0	0.298	29.8
10292	ENSG00000176225	RTTN	18	-	70065756	70065922	70065828	70065922	70059849	70060042	10292	0,2,1	10,6,10	5,1,5	3,1,12	211	139	0.000521943	0.0230252	0.0,0.18,0.062	0.523,0.397,0.215	-0.298	29.8
33189	ENSG00000265681	RPL17	18	-	49491621	49491814	49491625	49491814	49490792	49490927	33189	24,17,29	35,30,14	37,22,23	5,4,15	143	139	0.00116855	0.0405468	0.4,0.355,0.668	0.878,0.842,0.598	-0.298	29.8
26903	ENSG00000120963	ZNF706	8	-	101202332	101205287	101205094	101205287	101201606	101201743	26903	202262212	0,0,0	81100108	3,4,0	2901	139	1.18839e-05	0.00157639	1.0,1.0,1.0	0.564,0.545,1.0	0.297	29.7
14083	ENSG00000120509	PDZD11	X	-	70290395	70290514	70290403	70290514	70289251	70289354	14083	3,4,4	3,6,5	1,2,0	9,4,7	147	139	0.000891893	0.0333069	0.486,0.387,0.431	0.095,0.321,0.0	0.296	29.6
24768	ENSG00000235257	ITGA9-AS1	3	-	37818679	37818930	37818809	37818930	37808495	37808880	24768	8,4,4	3,6,0	8,11,5	0,0,1	269	139	5.9824e-05	0.00501196	0.579,0.256,1.0	1.0,1.0,0.721	-0.295	29.5
5890	ENSG00000120662	MTRF1	13	-	41261655	41261825	41261690	41261825	41260492	41260915	5890	9,8,1	6,13,8	0,2,0	13,17,3	174	139	1.10661e-05	0.00149384	0.545,0.33,0.091	0.0,0.086,0.0	0.293	29.3
17656	ENSG00000122786	CALD1	7	+	134932987	134934077	134932987	134933390	134935687	134935765	17656	103,103,63	7,17,11	46,54,43	22,26,16	826	139	2.66099e-05	0.00284391	0.712,0.505,0.491	0.26,0.259,0.311	0.293	29.3
9824	ENSG00000150093	ITGB1	10	-	32936241	32936423	32936349	32936423	32935491	32935558	9824	2,4,1	1,0,0	4,7,6	4,2,2	247	139	0.000145814	0.00960438	0.53,1.0,1.0	0.36,0.663,0.628	0.293	29.3
19536	ENSG00000132361	CLUH	17	-	2710960	2711198	2711052	2711198	2704361	2704564	19536	9,9,8	0,2,0	7,14,10	6,1,5	231	139	0.000334538	0.0167721	1.0,0.73,1.0	0.412,0.894,0.546	0.293	29.3
6563	ENSG00000013573	DDX11	12	+	31102267	31102335	31102267	31102301	31102426	31102527	6563	2,9,2	16,4,7	1,0,0	17,17,11	173	139	1.16044e-05	0.00155007	0.091,0.644,0.187	0.045,0.0,0.0	0.292	29.2
33190	ENSG00000265681	RPL17	18	-	49491516	49491584	49491531	49491584	49490792	49490927	33190	73,84,48	52,49,24	29,38,40	6,3,2	154	139	1.88473e-09	1.24142e-06	0.559,0.607,0.644	0.814,0.92,0.948	-0.291	29.1
31241	ENSG00000215012	C22orf29	22	-	19854646	19854863	19854819	19854863	19854442	19854539	31241	38,35,30	14,11,7	21,27,27	23,28,25	312	139	8.17208e-06	0.00118257	0.547,0.586,0.656	0.289,0.301,0.325	0.291	29.1
10421	ENSG00000196670	ZFP62	5	-	180861214	180861276	180861218	180861276	180851987	180852060	10421	6,2,0	4,5,2	0,0,0	3,3,3	143	139	3.83057e-05	0.00362226	0.593,0.28,0.0	0.0,0.0,0.0	0.291	29.1
11815	ENSG00000149547	EI24	11	+	125569839	125570035	125569839	125569947	125572457	125572569	11815	2,6,0	0,0,1	0,2,1	2,8,0	227	139	2.07079e-05	0.00234749	1.0,1.0,0.0	0.0,0.133,1.0	0.289	28.9
21174	ENSG00000139428	MMAB	12	-	109561682	109561852	109561762	109561852	109561419	109561517	21174	2,5,5	11,3,6	1,0,0	6,6,5	219	139	2.39597e-05	0.00264547	0.103,0.514,0.346	0.096,0.0,0.0	0.289	28.9
3131	ENSG00000156711	MAPK13	6	+	36130662	36130879	36130662	36130696	36131270	36131400	3131	12,10,11	0,3,4	15,13,18	0,0,0	322	139	2.84049e-05	0.00299766	1.0,0.59,0.543	1.0,1.0,1.0	-0.289	28.9
15742	ENSG00000117411	B4GALT2	1	+	43980017	43980244	43980017	43980046	43981108	43981473	15742	17,10,7	3,2,2	21,12,9	0,1,0	337	139	6.89464e-05	0.00554517	0.7,0.673,0.591	1.0,0.832,1.0	-0.289	28.9
31753	ENSG00000178038	ALS2CL	3	-	46693488	46693653	46693576	46693653	46689337	46689465	31753	5,4,5	1,0,5	6,3,4	0,0,0	227	139	0.000867492	0.0327155	0.754,1.0,0.38	1.0,1.0,1.0	-0.289	28.9
4683	ENSG00000072506	HSD17B10	X	-	53434177	53434336	53434311	53434336	53433721	53433886	4683	28,7,17	4,3,2	11,13,16	0,0,0	273	139	3.62738e-06	0.000652757	0.781,0.543,0.812	1.0,1.0,1.0	-0.288	28.8
4233	ENSG00000181544	FANCB	X	-	14872985	14873062	14873006	14873062	14868922	14869043	4233	10,7,4	1,4,2	18,11,10	0,0,0	160	139	4.86723e-05	0.00440623	0.897,0.603,0.635	1.0,1.0,1.0	-0.288	28.8
19684	ENSG00000204316	MRPL38	17	-	75904221	75904719	75904225	75904719	75902019	75902154	19684	1,1,0	0,7,3	1,3,4	2,0,2	143	139	0.00100689	0.0362205	1.0,0.122,0.0	0.327,1.0,0.66	-0.288	28.8
1488	ENSG00000111788	RP11-22B23.1	12	+	9283648	9283896	9283648	9283774	9288201	9288349	1488	2,4,0	2,2,2	0,0,0	1,6,5	261	139	0.0015118	0.0486566	0.347,0.516,0.0	0.0,0.0,0.0	0.288	28.8
32064	ENSG00000169026	MFSD7	4	-	687173	687325	687294	687325	686531	686690	32064	13,15,6	0,0,0	17,24,2	1,5,1	260	139	0.000258848	0.0143524	1.0,1.0,1.0	0.901,0.72,0.517	0.287	28.7
25944	ENSG00000259153	RP6-65G23.3	14	+	70810329	70810545	70810329	70810488	70815110	70815391	25944	22,18,2	4,1,2	16,22,14	0,0,0	196	139	0.00083082	0.0318673	0.796,0.927,0.415	1.0,1.0,1.0	-0.287	28.7
25310	ENSG00000171914	TLN2	15	+	62761680	62761853	62761680	62761821	62762271	62762453	25310	2,5,0	7,2,4	0,0,0	2,5,4	171	139	0.000768792	0.0302162	0.188,0.67,0.0	0.0,0.0,0.0	0.286	28.6
9061	ENSG00000100284	TOM1	22	+	35321958	35322153	35321958	35322019	35323027	35323177	9061	3,8,4	4,3,0	0,0,1	4,1,0	273	139	0.000341204	0.0169525	0.276,0.576,1.0	0.0,0.0,1.0	0.284	28.4
27343	ENSG00000169251	NMD3	3	+	161224929	161225147	161224929	161225018	161227246	161227343	27343	32,23,20	7,11,4	29,40,42	2,2,0	268	139	2.80534e-06	0.000533197	0.703,0.52,0.722	0.883,0.912,1.0	-0.283	28.3
31221	ENSG00000090266	NDUFB2	7	+	140696991	140697172	140696991	140697074	140700869	140700959	31221	36,24,21	3,3,3	19,19,12	6,7,11	237	139	0.000573397	0.0246683	0.876,0.824,0.804	0.65,0.614,0.39	0.283	28.3
4783	ENSG00000150316	CWC15	11	-	94973272	94973533	94973304	94973533	94972054	94972193	4783	22,17,15	18,21,11	9,3,1	15,10,16	171	139	0.00108281	0.0383596	0.498,0.397,0.526	0.328,0.196,0.048	0.283	28.3
22805	ENSG00000101166	PRELID3B	20	-	59036496	59036573	59036500	59036573	59033144	59035126	22805	26,21,16	19,15,8	18,20,35	2,2,6	143	139	4.93136e-06	0.000815553	0.571,0.576,0.66	0.897,0.907,0.85	-0.282	28.2
9584	ENSG00000172757	CFL1	11	-	65861137	65861373	65861370	65861373	65855934	65856242	9584	89,73,55	13,7,5	35,39,27	24,9,10	372	139	0.000158391	0.0101698	0.719,0.796,0.804	0.353,0.618,0.502	0.282	28.2
8159	ENSG00000130299	GTPBP3	19	+	17337558	17337651	17337558	17337576	17338007	17338255	8159	13,1,7	0,2,5	2,4,5	1,0,0	214	139	0.00148025	0.0480058	1.0,0.245,0.476	0.565,1.0,1.0	-0.281	28.1
2984	ENSG00000167377	ZNF23	16	-	71456636	71456830	71456763	71456830	71454041	71454168	2984	4,2,3	3,3,3	2,0,0	5,2,2	266	139	0.000703694	0.0285082	0.411,0.258,0.343	0.173,0.0,0.0	0.28	28
6686	ENSG00000141002	TCF25	16	+	89908965	89909109	89908965	89909083	89910590	89910663	6686	6,8,3	5,10,9	1,0,2	8,18,7	165	139	3.48067e-05	0.00338351	0.503,0.403,0.219	0.095,0.0,0.194	0.279	27.9
3810	ENSG00000102103	PQBP1	X	+	48901189	48901311	48901189	48901277	48901929	48902042	3810	3,0,2	2,6,1	0,2,1	1,0,0	173	139	0.000437223	0.0202709	0.547,0.0,0.616	0.0,1.0,1.0	-0.279	27.9
7894	ENSG00000110274	CEP164	11	+	117351758	117351992	117351758	117351988	117359431	117359560	7894	4,2,2	6,5,2	1,0,1	0,1,0	143	139	0.000565487	0.0244657	0.393,0.28,0.493	1.0,0.0,1.0	-0.278	27.8
25708	ENSG00000127419	TMEM175	4	+	948115	948615	948115	948154	950420	950518	25708	164176145	29,28,29	41,58,71	29,29,38	600	139	7.63323e-10	5.60793e-07	0.567,0.593,0.537	0.247,0.317,0.302	0.277	27.7
37816	ENSG00000153406	NMRAL1	16	-	4471250	4471449	4471313	4471449	4469354	4469465	37816	5,21,3	15,9,9	1,1,2	9,19,25	202	139	3.5003e-05	0.00339396	0.187,0.616,0.187	0.071,0.035,0.052	0.277	27.7
19831	ENSG00000125449	ARMC7	17	+	75114168	75114389	75114168	75114351	75128676	75129451	19831	11,8,5	0,0,1	5,7,4	0,10,2	177	139	5.4463e-05	0.00471803	1.0,1.0,0.797	1.0,0.355,0.611	0.277	27.7
23844	ENSG00000115459	ELMOD3	2	+	85355916	85356533	85355916	85356114	85356966	85357252	23844	54,73,55	0,0,1	12,12,13	0,1,6	558	139	0.00024902	0.0139492	1.0,1.0,0.932	1.0,0.749,0.351	0.277	27.7
10468	ENSG00000095066	HOOK2	19	-	12774494	12774741	12774634	12774741	12772873	12773044	10468	115,80,81	14,36,14	27,26,17	12,24,15	279	139	0.000575033	0.0247109	0.804,0.525,0.742	0.529,0.351,0.361	0.277	27.7
29778	ENSG00000101400	SNTA1	20	-	33412185	33412426	33412295	33412426	33408717	33408888	29778	27,55,21	10,10,8	17,21,24	1,0,2	249	139	1.84493e-05	0.00216081	0.601,0.754,0.594	0.905,1.0,0.87	-0.275	27.5
8478	ENSG00000143416	SELENBP1	1	-	151365525	151365684	151365534	151365684	151365188	151365281	8478	2,4,7	1,6,4	1,1,2	1,0,0	148	139	0.000122605	0.00843945	0.653,0.385,0.622	0.484,1.0,1.0	-0.275	27.5
7636	ENSG00000123349	PFDN5	12	+	53295838	53295948	53295838	53295941	53298044	53298150	7636	20,33,15	9,9,12	27,25,15	1,2,1	146	139	2.62104e-06	0.000503174	0.679,0.777,0.543	0.963,0.922,0.935	-0.274	27.4
40009	ENSG00000005379	BZRAP1	17	-	58324788	58325002	58324810	58325002	58323467	58323545	40009	5,2,1	6,5,0	4,3,2	1,1,0	161	139	0.000803492	0.0310372	0.418,0.257,1.0	0.775,0.721,1.0	-0.274	27.4
24062	ENSG00000092931	MFSD11	17	+	76737678	76738165	76737678	76737918	76738281	76738442	24062	69,84,36	7,3,3	62,53,47	12,20,14	386	139	1.60979e-05	0.00197745	0.78,0.91,0.812	0.65,0.488,0.547	0.272	27.2
17335	ENSG00000267106	ZNF561-AS1	19	+	9621290	9621416	9621290	9621350	9632227	9632417	17335	10,0,1	0,3,0	1,1,0	0,3,6	205	139	0.00121176	0.0414527	1.0,0.0,1.0	1.0,0.184,0.0	0.272	27.2
24776	ENSG00000133433	GSTT2B	22	-	23958854	23958963	23958911	23958963	23958550	23958701	24776	9,8,4	0,5,3	6,2,7	0,0,1	196	139	0.000133692	0.008996	1.0,0.532,0.486	1.0,1.0,0.832	-0.271	27.1
3361	ENSG00000131368	MRPS25	3	-	15053290	15053467	15053379	15053467	15049765	15049935	3361	8,13,13	5,3,2	10,16,13	0,2,0	228	139	0.000152653	0.00995191	0.494,0.725,0.798	1.0,0.83,1.0	-0.271	27.1
4076	ENSG00000221874	ZNF816-ZNF321P	19	-	52962716	52962823	52962726	52962823	52956026	52956104	4076	5,7,7	20,11,15	20,13,11	11,11,10	149	139	0.00120366	0.0413149	0.189,0.373,0.303	0.629,0.524,0.506	-0.265	26.5
29288	ENSG00000181885	CLDN7	17	-	7263123	7263200	7263158	7263200	7261820	7262085	29288	6,4,4	6,8,11	1,1,0	8,10,6	174	139	3.35305e-05	0.00330999	0.444,0.285,0.225	0.091,0.074,0.0	0.263	26.3
35969	ENSG00000110888	CAPRIN2	12	-	30714958	30716676	30716507	30716676	30713784	30713885	35969	372399239	0,2,1	138186142	2,6,10	1688	139	1.93137e-07	5.85587e-05	1.0,0.943,0.952	0.85,0.719,0.539	0.262	26.2
27660	ENSG00000140632	GLYR1	16	-	4814450	4814629	4814536	4814629	4813736	4813955	27660	23,23,11	5,5,4	11,26,14	0,0,1	225	139	1.70647e-06	0.0003582	0.74,0.74,0.629	1.0,1.0,0.896	-0.262	26.2
9586	ENSG00000172757	CFL1	11	-	65861270	65861373	65861370	65861373	65855934	65856242	9586	82,68,55	13,7,5	30,38,24	24,9,10	239	139	0.000172342	0.0107482	0.786,0.85,0.865	0.421,0.711,0.583	0.262	26.2
29740	ENSG00000102312	PORCN	X	+	48511891	48512507	48511891	48511935	48514239	48514365	29740	34,25,18	0,0,2	34,25,35	2,4,6	711	139	0.000262895	0.014447	1.0,1.0,0.638	0.769,0.55,0.533	0.262	26.2
18866	ENSG00000110756	HPS5	11	-	18321945	18322174	18322132	18322174	18311913	18312024	18866	38,48,30	11,16,15	90,42,60	2,10,6	326	139	0.000341241	0.0169525	0.596,0.561,0.46	0.95,0.642,0.81	-0.262	26.2
7494	ENSG00000005801	ZNF195	11	-	3362532	3362602	3362545	3362602	3361796	3361889	7494	4,2,3	7,5,9	0,1,0	8,14,6	152	139	1.80461e-05	0.00214104	0.343,0.268,0.234	0.0,0.061,0.0	0.261	26.1
41039	ENSG00000159363	ATP13A2	1	-	16995963	16996164	16995990	16996164	16993628	16993835	41039	28,26,13	11,17,16	33,30,27	6,8,4	166	139	0.000790764	0.0308527	0.681,0.562,0.405	0.822,0.758,0.85	-0.261	26.1
10673	ENSG00000204387	C6orf48	6	+	31834921	31835051	31834921	31834975	31835410	31835462	10673	15,16,4	1,0,0	9,7,10	2,1,5	215	139	2.88219e-05	0.00302437	0.907,1.0,1.0	0.744,0.819,0.564	0.26	26
32675	ENSG00000143420	ENSA	1	-	150625494	150625688	150625499	150625688	150622728	150622859	32675	19,18,7	2,0,0	3,8,4	1,3,2	144	139	0.000925734	0.034236	0.902,1.0,1.0	0.743,0.72,0.659	0.26	26
18031	ENSG00000163463	KRTCAP2	1	-	155173088	155173257	155173247	155173257	155172890	155172892	18031	6,6,0	1,3,4	0,4,1	1,0,0	298	139	0.00108635	0.0383922	0.737,0.483,0.0	0.0,1.0,1.0	-0.26	26
29426	ENSG00000180376	CCDC66	3	+	56566593	56566759	56566593	56566740	56566949	56567053	29426	26,24,11	3,11,7	10,17,9	1,0,0	158	139	1.70639e-06	0.0003582	0.884,0.657,0.58	0.898,1.0,1.0	-0.259	25.9
29011	ENSG00000113583	C5orf15	5	-	133968465	133968674	133968525	133968674	133959534	133960020	29011	16,21,26	16,12,15	43,33,20	5,5,9	199	139	0.000999305	0.0360791	0.411,0.55,0.548	0.857,0.822,0.608	-0.259	25.9
24783	ENSG00000133433	GSTT2B	22	-	23958863	23958980	23958886	23958980	23958550	23958701	24783	5,7,5	2,2,5	7,2,5	1,0,1	162	139	0.00073125	0.0291607	0.682,0.75,0.462	0.857,1.0,0.811	-0.258	25.8
27899	ENSG00000206573	THUMPD3-AS1	3	-	9391597	9391826	9391678	9391826	9390289	9390497	27899	97,94,75	28,26,33	27,39,38	29,32,37	220	139	5.22915e-07	0.000134073	0.686,0.696,0.589	0.37,0.435,0.394	0.257	25.7
19596	ENSG00000146733	PSPH	7	-	56042388	56042483	56042390	56042483	56033960	56034154	19596	0,0,0	8,6,3	2,1,4	10,8,4	141	139	0.000159847	0.0102289	0.0,0.0,0.0	0.165,0.11,0.496	-0.257	25.7
30064	ENSG00000196535	MYO18A	17	-	29176532	29176752	29176673	29176752	29165941	29167021	30064	11,22,9	0,1,0	10,13,13	3,2,2	280	139	0.000134582	0.00902653	1.0,0.916,1.0	0.623,0.763,0.763	0.256	25.6
33705	ENSG00000111670	GNPTAB	12	-	101753889	101754085	101754023	101754085	101753371	101753539	33705	13,10,10	2,1,3	5,1,5	0,0,0	273	139	0.000366842	0.0180599	0.768,0.836,0.629	1.0,1.0,1.0	-0.256	25.6
26814	ENSG00000184009	ACTG1	17	-	81512600	81512790	81512605	81512790	81512231	81512360	26814	5,3,2	4,5,9	0,0,1	2,4,2	144	139	0.000104703	0.00753288	0.547,0.367,0.177	0.0,0.0,0.326	0.255	25.5
8160	ENSG00000130299	GTPBP3	19	+	17337558	17337660	17337558	17337576	17338007	17338255	8160	15,3,7	0,2,5	4,4,4	1,0,0	223	139	0.000295195	0.0153852	1.0,0.483,0.466	0.714,1.0,1.0	-0.255	25.5
18757	ENSG00000012061	ERCC1	19	-	45423780	45423989	45423822	45423989	45423284	45423381	18757	42,51,20	0,9,4	9,16,14	5,9,5	181	139	0.000716345	0.0287766	1.0,0.813,0.793	0.58,0.577,0.683	0.255	25.5
27897	ENSG00000206573	THUMPD3-AS1	3	-	9391595	9391826	9391678	9391826	9390289	9390497	27897	102,93,82	28,26,33	30,37,43	29,32,37	222	139	3.13582e-07	8.61854e-05	0.695,0.691,0.609	0.393,0.42,0.421	0.254	25.4
361	ENSG00000189046	ALKBH2	12	-	109093349	109093469	109093351	109093469	109092506	109092787	361	10,3,1	0,0,0	11,6,8	2,4,2	141	139	1.2781e-05	0.00165275	1.0,1.0,1.0	0.844,0.597,0.798	0.254	25.4
1876	ENSG00000170581	STAT2	12	-	56349344	56349509	56349425	56349509	56348528	56348623	1876	10,10,13	0,2,0	6,6,12	2,3,2	220	139	0.00110734	0.0389895	1.0,0.76,1.0	0.655,0.558,0.791	0.252	25.2
18129	ENSG00000265408	RP11-361L15.4	16	+	66942711	66942789	66942711	66942737	66943298	66943371	18129	35,18,40	6,2,3	20,30,12	10,12,6	191	139	0.000198912	0.0119042	0.809,0.868,0.907	0.593,0.645,0.593	0.251	25.1
9579	ENSG00000172757	CFL1	11	-	65861161	65861373	65861370	65861373	65855934	65856242	9579	99,86,58	13,7,5	37,43,40	24,9,10	348	139	0.00050587	0.0224718	0.753,0.831,0.822	0.381,0.656,0.615	0.251	25.1
12233	ENSG00000181404	WASH1	9	-	16964	17166	16968	17166	16717	16876	12233	0,1,2	31,23,16	2,4,3	5,6,10	143	139	9.85176e-05	0.00718257	0.0,0.041,0.108	0.28,0.393,0.226	-0.25	25
19325	ENSG00000198546	ZNF511	10	+	133310169	133310417	133310169	133310229	133311715	133313162	19325	14,23,9	16,9,12	6,10,3	25,23,32	327	139	3.60578e-05	0.00345337	0.271,0.521,0.242	0.093,0.156,0.038	0.249	24.9
33724	ENSG00000237441	RGL2	6	-	33297797	33297993	33297930	33297993	33297213	33297343	33724	5,11,1	2,7,6	0,3,0	3,3,11	272	139	0.00133642	0.0444731	0.561,0.445,0.078	0.0,0.338,0.0	0.249	24.9
16974	ENSG00000165868	HSPA12A	10	-	116683790	116683958	116683812	116683958	116681790	116681877	16974	25,18,5	9,2,3	20,24,14	0,0,1	161	139	2.37549e-06	0.000465597	0.706,0.886,0.59	1.0,1.0,0.924	-0.247	24.7
6958	ENSG00000181817	LSM10	1	-	36397762	36397878	36397769	36397878	36394013	36394153	6958	6,4,3	5,5,0	14,11,4	0,1,1	146	139	0.000185977	0.0114043	0.533,0.432,1.0	1.0,0.913,0.792	-0.247	24.7
21302	ENSG00000074582	BCS1L	2	+	218659759	218659811	218659759	218659800	218660306	218660475	21302	0,1,0	8,2,2	1,6,1	4,2,6	150	139	0.000504149	0.0224476	0.0,0.317,0.0	0.188,0.735,0.134	-0.247	24.7
15302	ENSG00000108848	LUC7L3	17	+	50751296	50751375	50751296	50751362	50752199	50752585	15302	30,25,22	2,2,1	9,8,8	7,4,1	152	139	0.000567721	0.0244793	0.932,0.92,0.953	0.54,0.647,0.88	0.246	24.6
2851	ENSG00000124215	CDH26	20	+	59986101	59986182	59986101	59986174	59987452	59987638	2851	3,3,0	0,1,1	0,3,0	1,0,1	147	139	0.00089558	0.0333468	1.0,0.739,0.0	0.0,1.0,0.0	0.246	24.6
25162	ENSG00000214725	CDIPT-AS1	16	+	29865159	29865237	29865159	29865193	29867863	29868053	25162	8,4,7	2,0,5	3,5,4	0,0,0	183	139	9.59836e-05	0.00705166	0.752,1.0,0.515	1.0,1.0,1.0	-0.244	24.4
29962	ENSG00000235590	GNAS-AS1	20	-	58850529	58850903	58850662	58850903	58842432	58842545	29962	13,11,4	7,0,1	16,12,16	1,0,0	272	139	0.000221464	0.0128972	0.487,1.0,0.671	0.891,1.0,1.0	-0.244	24.4
6960	ENSG00000181817	LSM10	1	-	36397617	36397878	36397769	36397878	36394013	36394153	6960	9,7,5	5,5,0	16,16,5	0,1,1	291	139	0.000302698	0.0155849	0.462,0.401,1.0	1.0,0.884,0.705	-0.242	24.2
29036	ENSG00000166801	FAM111A	11	+	59144743	59144900	59144743	59144896	59148843	59148953	29036	5,1,4	6,3,7	0,0,1	4,11,2	143	139	2.44197e-05	0.00267879	0.448,0.245,0.357	0.0,0.0,0.327	0.241	24.1
32079	ENSG00000177853	ZNF518A	10	+	96155325	96155398	96155325	96155376	96155923	96156019	32079	3,4,0	27,33,19	6,7,7	14,14,12	161	139	4.50656e-05	0.00413856	0.088,0.095,0.0	0.27,0.302,0.335	-0.241	24.1
16530	ENSG00000120008	WDR11	10	+	120851486	120851591	120851486	120851549	120852523	120852635	16530	2,1,0	0,0,2	0,1,1	2,0,2	181	139	0.000483803	0.021925	1.0,1.0,0.0	0.0,1.0,0.277	0.241	24.1
7018	ENSG00000183010	PYCR1	17	-	81937227	81937257	81937241	81937257	81936747	81936861	7018	7,3,4	0,2,0	10,11,6	3,6,6	153	139	0.000647235	0.0270233	1.0,0.577,1.0	0.752,0.625,0.476	0.241	24.1
26029	ENSG00000111652	COPS7A	12	+	6724297	6724409	6724297	6724330	6724613	6724818	26029	0,2,0	8,7,7	4,2,2	2,10,5	218	139	0.00090404	0.0335963	0.0,0.154,0.0	0.56,0.113,0.203	-0.241	24.1
11520	ENSG00000164081	TEX264	3	+	51671626	51671715	51671626	51671672	51674270	51674381	11520	9,11,7	0,2,6	9,9,5	0,0,0	182	139	7.43011e-05	0.00586472	1.0,0.808,0.471	1.0,1.0,1.0	-0.24	24
39398	ENSG00000107186	MPDZ	9	-	13279326	13279564	13279399	13279564	13250299	13250372	39398	0,0,1	8,9,2	6,0,2	2,1,3	212	139	0.000415217	0.019705	0.0,0.0,0.247	0.663,0.0,0.304	-0.24	24
25553	ENSG00000125676	THOC2	X	-	123620092	123620205	123620115	123620205	123619400	123619436	25553	13,12,9	3,3,3	10,4,7	0,0,0	162	139	1.94059e-05	0.00223977	0.788,0.774,0.72	1.0,1.0,1.0	-0.239	23.9
30003	ENSG00000141736	ERBB2	17	+	39706989	39707204	39706989	39707141	39711927	39712047	30003	15,20,13	0,0,0	6,6,14	0,3,4	202	139	9.98094e-05	0.00724909	1.0,1.0,1.0	1.0,0.579,0.707	0.238	23.8
33554	ENSG00000105854	PON2	7	-	95416171	95416294	95416241	95416294	95412323	95412451	33554	69,61,69	16,15,10	31,23,35	23,19,12	209	139	0.000339858	0.0169499	0.741,0.73,0.821	0.473,0.446,0.66	0.238	23.8
10607	ENSG00000160336	ZNF761	19	+	53433592	53433757	53433592	53433750	53445000	53445123	10607	0,1,1	1,9,0	1,3,1	2,0,1	146	139	0.0010007	0.0360791	0.0,0.096,1.0	0.323,1.0,0.488	-0.238	23.8
34647	ENSG00000130349	C6orf203	6	+	107028212	107028797	107028212	107028271	107039748	107040230	34647	150,172,98	21,32,14	143129106	61,51,44	665	139	7.04371e-08	2.51487e-05	0.599,0.529,0.594	0.329,0.346,0.335	0.237	23.7
37810	ENSG00000153406	NMRAL1	16	-	4471288	4471449	4471313	4471449	4469354	4469465	37810	4,8,2	15,9,9	0,0,2	9,19,25	164	139	5.66905e-06	0.000903736	0.184,0.43,0.158	0.0,0.0,0.063	0.236	23.6
17145	ENSG00000100316	RPL3	22	-	39319393	39319595	39319498	39319595	39318398	39318592	17145	21,20,15	1,0,0	12,7,8	2,5,0	244	139	0.000308973	0.0157804	0.923,1.0,1.0	0.774,0.444,1.0	0.235	23.5
30822	ENSG00000188917	TRMT2B	X	-	101051250	101051733	101051643	101051733	101041316	101041371	30822	82,86,51	2,7,8	51,57,56	0,0,0	532	139	1.47072e-07	4.60541e-05	0.915,0.762,0.625	1.0,1.0,1.0	-0.233	23.3
32066	ENSG00000169026	MFSD7	4	-	687077	687325	687294	687325	686531	686690	32066	31,19,19	0,0,0	18,26,8	1,5,1	356	139	5.04331e-05	0.00451663	1.0,1.0,1.0	0.875,0.67,0.757	0.233	23.3
17800	ENSG00000205981	DNAJC19	3	-	180989336	180989518	180989422	180989518	180988181	180988229	17800	6,6,3	2,2,3	7,1,1	0,1,0	225	139	0.000280887	0.0149662	0.65,0.65,0.382	1.0,0.382,1.0	-0.233	23.3
37735	ENSG00000169660	HEXDC	17	+	82439630	82440334	82439630	82439713	82440996	82441075	37735	109,136,79	28,31,12	40,55,30	26,20,30	760	139	3.76278e-05	0.00356699	0.416,0.445,0.546	0.22,0.335,0.155	0.232	23.2
31685	ENSG00000197586	ENTPD6	20	+	25212151	25212393	25212151	25212260	25213262	25213406	31685	10,5,5	13,9,11	0,0,0	3,7,10	272	139	1.53385e-07	4.76403e-05	0.282,0.221,0.189	0.0,0.0,0.0	0.231	23.1
13793	ENSG00000137106	GRHPR	9	+	37422665	37422833	37422665	37422805	37425921	37425994	13793	22,10,15	2,0,1	19,29,32	10,7,9	167	139	6.05984e-05	0.00504366	0.902,1.0,0.926	0.613,0.775,0.747	0.231	23.1
24399	ENSG00000178982	EIF3K	19	+	38619094	38619298	38619094	38619223	38620336	38620373	24399	26,27,28	45,46,44	43,55,56	21,29,53	214	139	5.22914e-05	0.00460297	0.273,0.276,0.292	0.571,0.552,0.407	-0.23	23
17944	ENSG00000186998	EMID1	22	+	29214925	29215075	29214925	29215039	29215526	29215630	17944	1,6,0	2,7,3	0,0,0	6,9,2	175	139	0.000322156	0.0163011	0.284,0.405,0.0	0.0,0.0,0.0	0.23	23
33471	ENSG00000071462	WBSCR22	7	+	73683591	73683804	73683591	73683673	73692595	73693414	33471	1,4,2	2,3,5	0,0,1	1,2,5	270	139	0.000592408	0.0252162	0.205,0.407,0.171	0.0,0.0,0.093	0.23	23
19327	ENSG00000198546	ZNF511	10	+	133310169	133310366	133310169	133310229	133311715	133313162	19327	7,15,8	16,9,12	1,8,2	25,23,32	276	139	3.702e-05	0.0035181	0.181,0.456,0.251	0.02,0.149,0.031	0.229	22.9
38188	ENSG00000073670	ADAM11	17	+	44772398	44772466	44772398	44772462	44772856	44772931	38188	7,5,4	3,3,2	1,2,6	0,1,0	143	139	0.000167547	0.010545	0.694,0.618,0.66	1.0,0.66,1.0	-0.229	22.9
24050	ENSG00000155755	TMEM237	2	-	201636729	201636885	201636747	201636885	201634803	201634893	24050	10,18,6	3,6,4	9,6,10	0,2,0	157	139	0.000252358	0.0141154	0.747,0.726,0.57	1.0,0.726,1.0	-0.228	22.8
10815	ENSG00000159086	PAXBP1	21	-	32755212	32755353	32755229	32755353	32751118	32751218	10815	62,73,51	145155109	12,7,8	122110118	156	139	0	0	0.276,0.296,0.294	0.081,0.054,0.057	0.225	22.5
6605	ENSG00000204628	GNB2L1	5	-	181242122	181242345	181242169	181242345	181241512	181241639	6605	57,31,27	124131115	26,33,14	21,30,25	186	139	2.12467e-05	0.00238264	0.256,0.15,0.149	0.481,0.451,0.295	-0.224	22.4
12748	ENSG00000136068	FLNB	3	+	58131926	58132001	58131926	58131989	58132807	58132931	12748	13,9,14	15,19,9	2,0,1	8,9,1	151	139	0.000692382	0.0282586	0.444,0.304,0.589	0.187,0.0,0.479	0.224	22.4
15028	ENSG00000126214	KLC1	14	+	103679383	103679545	103679383	103679518	103687080	103687211	15028	78,68,37	74,81,53	76,59,60	29,33,29	166	139	1.53053e-06	0.000330345	0.469,0.413,0.369	0.687,0.6,0.634	-0.223	22.3
21512	ENSG00000214021	TTLL3	3	+	9817644	9818920	9817644	9817759	9820545	9820779	21512	179124110	1,12,2	24,40,29	0,0,0	1300	139	7.13088e-06	0.00107676	0.95,0.525,0.855	1.0,1.0,1.0	-0.223	22.3
3481	ENSG00000123444	KBTBD4	11	-	47578831	47579015	47578932	47579015	47577410	47578028	3481	16,5,9	9,16,13	3,4,0	8,21,19	240	139	0.000394255	0.0189361	0.507,0.153,0.286	0.178,0.099,0.0	0.223	22.3
12998	ENSG00000111247	RAD51AP1	12	+	4543762	4543911	4543762	4543904	4545218	4545312	12998	4,7,9	3,3,3	2,2,4	1,0,0	146	139	0.000218633	0.0127909	0.559,0.69,0.741	0.656,1.0,1.0	-0.222	22.2
27082	ENSG00000163867	ZMYM6	1	-	35031262	35031337	35031266	35031337	35030546	35030713	27082	1,4,2	10,10,2	1,0,0	4,1,2	143	139	0.000230236	0.0133066	0.089,0.28,0.493	0.195,0.0,0.0	0.222	22.2
17701	ENSG00000099901	RANBP1	22	+	20118260	20118402	20118260	20118313	20119012	20119149	17701	3,14,3	8,10,7	2,1,3	16,22,18	228	139	0.000134943	0.00902844	0.186,0.46,0.207	0.071,0.027,0.092	0.221	22.1
2589	ENSG00000148290	SURF1	9	-	133356132	133356320	133356268	133356320	133354658	133354741	2589	16,12,11	0,4,2	22,10,18	0,0,0	275	139	0.00108443	0.0383596	1.0,0.603,0.735	1.0,1.0,1.0	-0.221	22.1
14845	ENSG00000185101	ANO9	11	-	429473	429652	429569	429652	428721	428826	14845	3,14,7	7,17,6	1,0,3	7,10,7	235	139	0.000523339	0.0230601	0.202,0.328,0.408	0.078,0.0,0.202	0.219	21.9
15888	ENSG00000250151	ARPC4-TTLL3	3	+	9826996	9827240	9826996	9827148	9828959	9829395	15888	25,18,12	3,4,6	8,9,11	0,0,2	231	139	0.000603058	0.0255417	0.834,0.73,0.546	1.0,1.0,0.768	-0.219	21.9
13302	ENSG00000168026	TTC21A	3	+	39112457	39112647	39112457	39112580	39114584	39114742	13302	0,6,4	14,6,8	0,0,0	6,3,2	206	139	4.96971e-05	0.00448836	0.0,0.403,0.252	0.0,0.0,0.0	0.218	21.8
19830	ENSG00000125449	ARMC7	17	+	75114290	75114637	75114290	75114351	75128676	75129451	19830	46,20,21	0,0,1	39,30,16	0,10,2	425	139	6.86687e-05	0.00553449	1.0,1.0,0.873	1.0,0.495,0.723	0.218	21.8
28828	ENSG00000114867	EIF4G1	3	+	184331265	184331363	184331265	184331277	184331471	184331606	28828	2,5,3	1,0,1	2,2,1	6,2,0	225	139	0.000717895	0.0288086	0.553,1.0,0.65	0.171,0.382,1.0	0.217	21.7
40580	ENSG00000143224	PPOX	1	+	161167099	161167234	161167099	161167233	161167354	161167486	40580	0,2,0	9,5,2	1,5,3	2,10,8	140	139	0.00107592	0.0382002	0.0,0.284,0.0	0.332,0.332,0.271	-0.217	21.7
28663	ENSG00000243660	ZNF487	10	+	43437147	43437262	43437147	43437155	43454064	43454195	28663	47,24,28	1,0,3	28,29,13	3,4,7	246	139	0.000924411	0.0342202	0.964,1.0,0.841	0.841,0.804,0.512	0.216	21.6
9834	ENSG00000150093	ITGB1	10	-	32933341	32933583	32933481	32933583	32932514	32932600	9834	10,10,8	7,2,0	2,14,16	0,2,0	279	139	0.00137092	0.0453236	0.416,0.714,1.0	1.0,0.777,1.0	-0.216	21.6
31919	ENSG00000249115	HAUS5	19	+	35614034	35614231	35614034	35614134	35615041	35615147	31919	5,7,1	5,6,3	0,1,1	6,8,2	236	139	6.85382e-05	0.00553449	0.371,0.407,0.164	0.0,0.069,0.227	0.215	21.5
30041	ENSG00000100083	GGA1	22	+	37608947	37609154	37608947	37609150	37614189	37614274	30041	22,22,8	2,11,4	38,14,22	3,0,1	143	139	0.000263202	0.014447	0.914,0.66,0.66	0.925,1.0,0.955	-0.215	21.5
38172	ENSG00000240225	ZNF542P	19	+	56368120	56368360	56368120	56368220	56368865	56368936	38172	4,5,2	2,3,0	5,13,3	0,0,1	279	139	0.00123092	0.0417998	0.499,0.454,1.0	1.0,1.0,0.599	-0.215	21.5
16297	ENSG00000070882	OSBPL3	7	-	24834086	24834736	24834485	24834736	24830767	24830905	16297	32,30,21	20,19,13	19,6,7	32,26,39	538	139	4.41984e-09	2.52017e-06	0.292,0.29,0.294	0.133,0.056,0.044	0.214	21.4
29	ENSG00000273018	CTD-2303H24.2	17	-	18523638	18523877	18523776	18523877	18519481	18519674	29	14,9,7	12,13,13	2,0,0	4,6,6	277	139	1.86846e-05	0.00217625	0.369,0.258,0.213	0.201,0.0,0.0	0.213	21.3
1668	ENSG00000259823	LYPD8	1	-	248748257	248748453	248748288	248748453	248745141	248745279	1668	0,0,0	3,5,1	0,4,4	9,4,14	170	139	0.000192111	0.0116681	0.0,0.0,0.0	0.0,0.45,0.189	-0.213	21.3
30065	ENSG00000196535	MYO18A	17	-	29176571	29176752	29176673	29176752	29165941	29167021	30065	18,25,9	0,1,0	12,16,12	3,2,2	241	139	0.00026723	0.0145635	1.0,0.935,1.0	0.698,0.822,0.776	0.213	21.3
27734	ENSG00000163378	EOGT	3	-	68998006	68998114	68998010	68998114	68988924	68989017	27734	0,0,0	28,19,5	2,5,2	6,18,9	143	139	9.91282e-06	0.00138718	0.0,0.0,0.0	0.245,0.213,0.178	-0.212	21.2
21456	ENSG00000175482	POLD4	11	-	67353408	67353514	67353452	67353514	67352987	67353077	21456	9,17,9	1,2,6	17,13,7	0,1,0	183	139	8.20332e-05	0.00630303	0.872,0.866,0.533	1.0,0.908,1.0	-0.212	21.2
31	ENSG00000273018	CTD-2303H24.2	17	-	18523650	18523877	18523776	18523877	18519481	18519674	31	14,9,6	12,13,13	2,0,0	4,6,6	265	139	2.58905e-05	0.00281794	0.38,0.266,0.195	0.208,0.0,0.0	0.211	21.1
1299	ENSG00000145723	GIN1	5	-	103106715	103106906	103106719	103106906	103104540	103104846	1299	48,39,28	12,15,10	59,30,52	2,3,0	143	139	3.85519e-09	2.26584e-06	0.795,0.716,0.731	0.966,0.907,1.0	-0.21	21
8687	ENSG00000087586	AURKA	20	-	56391976	56392215	56392167	56392215	56388155	56388202	8687	84,65,54	27,31,16	59,83,44	71,45,44	330	139	0.000277462	0.0149294	0.567,0.469,0.587	0.259,0.437,0.296	0.21	21
25583	ENSG00000162572	SCNN1D	1	+	1282010	1282192	1282010	1282187	1282275	1282315	25583	0,0,0	10,7,11	2,5,0	4,11,6	144	139	0.000285077	0.0150486	0.0,0.0,0.0	0.326,0.305,0.0	-0.21	21
22950	ENSG00000187266	EPOR	19	-	11382846	11383232	11383096	11383232	11381933	11382105	22950	27,37,25	10,22,16	18,5,21	26,26,15	389	139	0.00130132	0.0436423	0.491,0.375,0.358	0.198,0.064,0.333	0.21	21
24614	ENSG00000136824	SMC2	9	+	104094295	104094486	104094295	104094350	104095323	104095552	24614	15,22,30	0,0,0	34,25,25	2,4,5	275	139	2.37655e-06	0.000465597	1.0,1.0,1.0	0.896,0.76,0.716	0.209	20.9
36696	ENSG00000170412	GPRC5C	17	+	74443076	74443221	74443076	74443134	74443817	74443912	36696	3,9,0	4,9,2	0,0,1	4,2,8	226	139	4.41944e-05	0.00407816	0.316,0.381,0.0	0.0,0.0,0.071	0.209	20.9
33959	ENSG00000180879	SSR4	X	+	153794190	153794422	153794190	153794391	153794673	153794754	33959	12,23,20	9,1,4	12,22,26	0,2,0	170	139	8.78437e-05	0.00661912	0.522,0.95,0.803	1.0,0.9,1.0	-0.208	20.8
10622	ENSG00000197785	ATAD3A	1	+	1527694	1527829	1527694	1527809	1529222	1529331	10622	7,10,4	14,14,11	1,1,3	14,16,11	159	139	0.000675666	0.0277554	0.304,0.384,0.241	0.059,0.052,0.193	0.208	20.8
30827	ENSG00000168488	ATXN2L	16	+	28824450	28824661	28824450	28824546	28825365	28825402	30827	23,26,18	0,7,4	4,24,10	0,0,0	254	139	5.93952e-06	0.000934789	1.0,0.67,0.711	1.0,1.0,1.0	-0.206	20.6
26003	ENSG00000111652	COPS7A	12	+	6724297	6724388	6724297	6724330	6724613	6724755	26003	2,13,4	8,7,7	1,0,1	2,10,5	197	139	0.000101438	0.00735339	0.15,0.567,0.287	0.261,0.0,0.124	0.206	20.6
24775	ENSG00000133433	GSTT2B	22	-	23958863	23958963	23958911	23958963	23958550	23958701	24775	7,12,6	0,5,3	8,2,8	0,0,1	187	139	0.000141538	0.00939693	1.0,0.641,0.598	1.0,1.0,0.856	-0.206	20.6
27485	ENSG00000133612	AGAP3	7	+	151117636	151117760	151117636	151117749	151118209	151118344	27485	30,26,21	19,9,12	52,37,39	10,7,4	150	139	0.000235418	0.013504	0.594,0.728,0.619	0.828,0.83,0.9	-0.206	20.6
28827	ENSG00000114867	EIF4G1	3	+	184331265	184331332	184331265	184331277	184331471	184331606	28827	2,4,4	1,0,1	2,3,1	6,2,0	194	139	0.00115762	0.0402774	0.589,1.0,0.741	0.193,0.518,1.0	0.206	20.6
2467	ENSG00000163312	HELQ	4	-	83443503	83443614	83443516	83443614	83441304	83441403	2467	4,7,1	15,12,12	0,0,0	1,6,5	152	139	6.49674e-06	0.000992779	0.196,0.348,0.071	0.0,0.0,0.0	0.205	20.5
23819	ENSG00000122678	POLM	7	-	44078739	44078811	44078755	44078811	44076508	44076629	23819	30,38,12	10,7,6	30,26,28	1,1,3	155	139	0.000131421	0.00893361	0.729,0.83,0.642	0.964,0.959,0.893	-0.205	20.5
22726	ENSG00000142534	RPS11	19	+	49497172	49497387	49497172	49497368	49497519	49497599	22726	30,26,24	30,26,32	32,33,32	15,15,16	158	139	0.000503216	0.0224322	0.468,0.468,0.398	0.652,0.659,0.638	-0.205	20.5
32503	ENSG00000260280	SLX1B-SULT1A4	16	+	29461637	29461763	29461637	29461738	29461852	29461950	32503	1,4,1	5,7,5	0,0,0	3,1,10	164	139	0.00110544	0.0389585	0.145,0.326,0.145	0.0,0.0,0.0	0.205	20.5
35498	ENSG00000152061	RABGAP1L	1	+	174219124	174219295	174219124	174219184	174220971	174221164	35498	21,23,24	4,3,8	35,25,28	2,0,2	250	139	0.00052573	0.0231122	0.745,0.81,0.625	0.907,1.0,0.886	-0.204	20.4
9970	ENSG00000132424	PNISR	6	-	99403828	99404702	99404602	99404702	99402537	99402710	9970	551604467	12,15,6	191156133	14,9,11	913	139	3.73943e-06	0.000667557	0.875,0.86,0.922	0.675,0.725,0.648	0.203	20.3
10448	ENSG00000186166	CCDC84	11	+	119011220	119011311	119011220	119011283	119011938	119012003	10448	54,45,22	56,65,63	13,7,8	52,38,48	167	139	3.52405e-05	0.00340833	0.445,0.366,0.225	0.172,0.133,0.122	0.203	20.3
21963	ENSG00000141756	FKBP10	17	+	41820442	41820662	41820442	41820599	41820946	41821089	21963	23,26,25	0,2,0	36,9,18	4,3,4	202	139	0.000103502	0.00746051	1.0,0.899,1.0	0.861,0.674,0.756	0.203	20.3
25628	ENSG00000132341	RAN	12	+	130872583	130872633	130872583	130872617	130872835	130872920	25628	3,10,13	0,1,0	16,19,6	2,2,5	155	139	0.000274564	0.0148447	1.0,0.9,1.0	0.878,0.895,0.518	0.203	20.3
20125	ENSG00000230590	FTX	X	-	74280376	74280494	74280393	74280494	74274341	74274410	20125	2,2,2	5,9,8	0,0,0	18,9,10	156	139	0.00124195	0.0420622	0.263,0.165,0.182	0.0,0.0,0.0	0.203	20.3
22455	ENSG00000205581	HMGN1	21	-	39345829	39347292	39347246	39347292	39345145	39345274	22455	11671192939	20,17,3	324350275	20,10,10	1556	139	8.40749e-06	0.00120296	0.839,0.862,0.965	0.591,0.758,0.711	0.202	20.2
36395	ENSG00000154040	CABYR	18	+	24155700	24156999	24155700	24156042	24159471	24160069	36395	9,20,8	1,2,1	1,10,2	0,0,1	1096	139	0.000792491	0.0308527	0.533,0.559,0.504	1.0,1.0,0.202	-0.202	20.2
2456	ENSG00000010361	FUZ	19	-	49812614	49812736	49812637	49812736	49812250	49812335	2456	22,11,8	1,7,1	1,8,2	0,0,0	162	139	5.2683e-05	0.00461893	0.95,0.574,0.873	1.0,1.0,1.0	-0.201	20.1
21003	ENSG00000146063	TRIM41	5	+	181234911	181235099	181234911	181234995	181235353	181235807	21003	146,148,86	62,65,42	91141102	26,11,21	243	139	6.03979e-05	0.00503795	0.574,0.566,0.539	0.667,0.88,0.735	-0.201	20.1
9165	ENSG00000171204	TMEM126B	11	+	85629131	85629262	85629131	85629203	85631686	85631808	9165	20,29,14	0,1,2	8,12,13	3,5,1	198	139	0.000845036	0.0322507	1.0,0.953,0.831	0.652,0.628,0.901	0.201	20.1
8494	ENSG00000129219	PLD2	17	+	4818296	4818390	4818296	4818344	4818493	4818607	8494	28,14,12	5,0,9	24,38,22	0,1,1	185	139	5.73106e-05	0.00487625	0.808,1.0,0.5	1.0,0.966,0.943	-0.2	20
39466	ENSG00000160172	FAM86C2P	11	-	67802860	67803064	67803001	67803064	67791647	67793293	39466	9,7,2	10,7,9	2,3,3	22,31,28	280	139	8.14504e-05	0.00627349	0.309,0.332,0.099	0.043,0.046,0.051	0.2	20
39226	ENSG00000104529	EEF1D	8	-	143580007	143580206	143580011	143580206	143579727	143579824	39226	10,22,10	3,2,5	14,12,11	1,0,0	143	139	5.62559e-05	0.0047972	0.764,0.914,0.66	0.932,1.0,1.0	-0.198	19.8
263	ENSG00000177426	TGIF1	18	+	3449412	3449656	3449412	3449417	3456353	3456580	263	37,44,20	0,0,2	8,25,10	3,4,0	378	139	0.000425493	0.0199694	1.0,1.0,0.786	0.495,0.697,1.0	0.198	19.8
26225	ENSG00000126456	IRF3	19	-	49664338	49664523	49664442	49664523	49663342	49663514	26225	6,12,7	11,18,14	2,2,0	19,12,15	243	139	7.89166e-06	0.00115702	0.238,0.276,0.222	0.057,0.087,0.0	0.197	19.7
34651	ENSG00000130349	C6orf203	6	+	107028212	107028434	107028212	107028271	107039748	107040230	34651	17,13,19	21,32,14	15,6,7	61,51,44	302	139	8.37261e-06	0.00120296	0.271,0.158,0.384	0.102,0.051,0.068	0.197	19.7
23056	ENSG00000177084	POLE	12	-	132625251	132625416	132625342	132625416	132624904	132624994	23056	21,15,28	3,3,3	5,15,2	0,0,0	230	139	4.08482e-05	0.00382482	0.809,0.751,0.849	1.0,1.0,1.0	-0.197	19.7
12847	ENSG00000095564	BTAF1	10	+	91959064	91959282	91959064	91959154	91959784	91959880	12847	104,96,78	58,80,53	29,37,14	54,35,45	267	139	0.000132506	0.00897538	0.483,0.385,0.434	0.218,0.355,0.139	0.197	19.7
22712	ENSG00000142534	RPS11	19	+	49497217	49497399	49497217	49497368	49497519	49497562	22712	41,28,31	30,26,32	45,42,32	15,15,16	170	139	0.000567143	0.0244793	0.528,0.468,0.442	0.71,0.696,0.621	-0.196	19.6
8932	ENSG00000196678	ERI2	16	-	20806009	20806450	20806046	20806450	20803602	20803670	8932	18,22,9	5,3,5	14,27,11	1,1,1	176	139	0.0010125	0.0363197	0.74,0.853,0.587	0.917,0.955,0.897	-0.196	19.6
30109	ENSG00000244067	GSTA2	6	-	52754937	52755075	52754942	52755075	52752853	52752995	30109	0,0,0	7,3,4	2,2,3	14,8,8	144	139	0.000424355	0.0199405	0.0,0.0,0.0	0.121,0.194,0.266	-0.194	19.4
35643	ENSG00000139531	SUOX	12	+	55997288	55997537	55997288	55997339	55997614	55997723	35643	10,17,11	19,23,18	1,1,1	25,45,46	337	139	5.18474e-14	1.32048e-10	0.178,0.234,0.201	0.016,0.009,0.009	0.193	19.3
7908	ENSG00000088451	TGDS	13	-	94595974	94596242	94596161	94596242	94593840	94593907	7908	20,18,28	1,0,0	22,20,22	1,6,2	326	139	6.69582e-05	0.00545417	0.895,1.0,1.0	0.904,0.587,0.824	0.193	19.3
19392	ENSG00000182919	C11orf54	11	+	93741641	93741890	93741641	93741728	93747301	93747448	19392	11,20,8	32,13,14	3,0,2	16,12,8	301	139	0.000165018	0.0104547	0.137,0.415,0.209	0.08,0.0,0.103	0.193	19.3
16542	ENSG00000169696	ASPSCR1	17	+	81978185	81978349	81978185	81978339	81979183	81979239	16542	0,1,0	1,5,5	4,1,2	6,11,5	149	139	0.000159814	0.0102289	0.0,0.157,0.0	0.383,0.078,0.272	-0.192	19.2
30693	ENSG00000166908	PIP4K2C	12	+	57591245	57591434	57591245	57591430	57594024	57594122	30693	8,9,2	5,4,0	9,14,6	0,2,0	143	139	0.000431642	0.0200853	0.609,0.686,1.0	1.0,0.872,1.0	-0.192	19.2
38591	ENSG00000109133	TMEM33	4	+	41935128	41935310	41935128	41935262	41935466	41935529	38591	98,81,63	88,88,59	99,103,77	31,47,47	187	139	4.05601e-05	0.00380717	0.453,0.406,0.442	0.704,0.62,0.549	-0.191	19.1
7238	ENSG00000203761	MSTO2P	1	+	155749521	155749631	155749521	155749598	155749922	155750137	7238	5,10,5	2,2,3	4,5,2	0,0,1	172	139	0.00049945	0.0223164	0.669,0.802,0.574	1.0,1.0,0.618	-0.191	19.1
23528	ENSG00000189007	ADAT2	6	-	143441392	143441448	143441437	143441448	143438589	143438694	23528	10,3,1	12,19,9	0,0,0	4,8,12	184	139	6.03842e-06	0.000941574	0.386,0.107,0.077	0.0,0.0,0.0	0.19	19
6124	ENSG00000100209	HSCB	22	+	28742700	28742937	28742700	28742728	28743881	28743978	6124	4,4,5	7,5,6	0,4,0	13,13,11	348	139	0.000243186	0.013723	0.186,0.242,0.25	0.0,0.109,0.0	0.19	19
26215	ENSG00000126456	IRF3	19	-	49665565	49665780	49665671	49665780	49664673	49664846	26215	80,97,49	3,15,1	50,55,52	12,11,14	245	139	0.000592732	0.0252162	0.938,0.786,0.965	0.703,0.739,0.678	0.19	19
17650	ENSG00000141560	FN3KRP	17	+	82720760	82720965	82720760	82720841	82722803	82722886	17650	3,5,3	7,13,4	0,0,1	7,4,7	263	139	5.78582e-05	0.00490101	0.185,0.169,0.284	0.0,0.0,0.07	0.189	18.9
18248	ENSG00000172590	MRPL52	14	+	22830186	22830339	22830186	22830254	22834171	22834234	18248	74,78,26	21,40,9	27,40,38	20,34,31	224	139	0.00155541	0.0498503	0.686,0.548,0.642	0.456,0.422,0.432	0.189	18.9
11066	ENSG00000163704	PRRT3	3	-	9952141	9952390	9952321	9952390	9949100	9950172	11066	14,8,17	15,21,17	5,2,0	24,9,11	319	139	6.81178e-05	0.00552506	0.289,0.142,0.303	0.083,0.088,0.0	0.188	18.8
8635	ENSG00000134030	CTIF	18	+	48757918	48758411	48757918	48758405	48761389	48761689	8635	7,13,8	45,25,15	1,0,4	15,25,18	145	139	0.000748976	0.0295896	0.13,0.333,0.338	0.06,0.0,0.176	0.188	18.8
10469	ENSG00000095066	HOOK2	19	-	12774494	12774741	12774668	12774741	12772873	12773044	10469	162132131	135149109	51,50,43	114137150	313	139	7.10543e-15	2.26207e-11	0.348,0.282,0.348	0.166,0.139,0.113	0.187	18.7
19675	ENSG00000089157	RPLP0	12	-	120200718	120200831	120200729	120200831	120199171	120199205	19675	14,28,30	4,11,5	21,15,15	0,0,2	150	139	9.42077e-06	0.00132375	0.764,0.702,0.848	1.0,1.0,0.874	-0.187	18.7
20698	ENSG00000120314	WDR55	5	+	140664867	140665101	140664867	140665097	140668233	140668334	20698	23,7,10	1,6,1	18,22,15	0,1,0	143	139	0.000623042	0.0263006	0.957,0.531,0.907	1.0,0.955,1.0	-0.187	18.7
4681	ENSG00000156042	CFAP70	10	-	73299600	73299665	73299604	73299665	73298906	73299097	4681	12,31,18	6,1,4	7,14,4	0,0,0	143	139	2.97501e-05	0.00307948	0.66,0.968,0.814	1.0,1.0,1.0	-0.186	18.6
34990	ENSG00000140939	NOL3	16	+	67174161	67174340	67174161	67174300	67174620	67174944	34990	44,74,49	17,23,19	95,81,82	18,8,6	179	139	2.62751e-05	0.00284391	0.668,0.714,0.667	0.804,0.887,0.914	-0.185	18.5
30260	ENSG00000189403	HMGB1	13	-	30464141	30464310	30464160	30464310	30463530	30463694	30260	56,49,40	82,65,43	14,15,10	49,53,24	158	139	2.82658e-05	0.00299124	0.375,0.399,0.45	0.201,0.199,0.268	0.185	18.5
12706	ENSG00000249209	AP000304.12	21	-	33931470	33931607	33931514	33931607	33915727	33915977	12706	23,18,7	2,3,2	6,15,7	0,0,0	183	139	0.000632844	0.0266404	0.897,0.82,0.727	1.0,1.0,1.0	-0.185	18.5
21335	ENSG00000204385	SLC44A4	6	-	31870606	31870702	31870610	31870702	31869544	31869637	21335	7,4,4	1,5,1	3,5,2	0,0,1	143	139	0.000727315	0.0290341	0.872,0.437,0.795	1.0,1.0,0.66	-0.185	18.5
35830	ENSG00000135409	AMHR2	12	+	53429452	53429645	53429452	53429625	53430145	53430282	35830	3,5,1	9,9,3	0,1,0	1,3,1	159	139	0.000428881	0.0199811	0.226,0.327,0.226	0.0,0.226,0.0	0.184	18.4
22178	ENSG00000269893	SNHG8	4	+	118278708	118279137	118278708	118278792	118279388	118279431	22178	351737112915	77,73,81	12211303980	139,114,96	484	139	0	0	0.929,0.936,0.912	0.716,0.766,0.746	0.183	18.3
364	ENSG00000163660	CCNL1	3	-	157151761	157151930	157151916	157151930	157150281	157150381	364	185163144	4,12,8	51,45,35	7,11,6	294	139	9.49153e-05	0.00702409	0.956,0.865,0.895	0.775,0.659,0.734	0.183	18.3
33719	ENSG00000237441	RGL2	6	-	33292454	33292553	33292464	33292553	33292105	33292313	33719	25,21,17	0,0,0	28,6,7	4,4,0	149	139	0.000253863	0.0141764	1.0,1.0,1.0	0.867,0.583,1.0	0.183	18.3
32033	ENSG00000133935	C14orf1	14	-	75654813	75654976	75654881	75654976	75651770	75651889	32033	8,12,8	24,16,13	2,4,2	26,19,14	207	139	0.000451443	0.0207974	0.183,0.335,0.292	0.049,0.124,0.088	0.183	18.3
15389	ENSG00000258539	RP11-12J10.3	10	-	124760317	124760503	124760385	124760503	124706635	124706887	15389	137,120,84	5,12,8	89,91,72	22,29,17	207	139	9.99194e-08	3.34844e-05	0.948,0.87,0.876	0.731,0.678,0.74	0.182	18.2
9895	ENSG00000111271	ACAD10	12	+	111710272	111710437	111710272	111710365	111712497	111712657	9895	9,3,7	9,7,12	1,0,2	4,13,5	211	139	0.000288245	0.0151054	0.397,0.22,0.278	0.141,0.0,0.209	0.182	18.2
28201	ENSG00000070601	FRMPD1	9	+	37737095	37737298	37737095	37737243	37740077	37740884	28201	1,1,1	32,37,15	1,10,1	19,8,5	194	139	0.000295852	0.0153984	0.022,0.019,0.046	0.036,0.472,0.125	-0.182	18.2
37360	ENSG00000105552	BCAT2	19	-	48810794	48811012	48810983	48811012	48800186	48800297	37360	16,27,10	46,38,15	3,0,1	47,36,48	328	139	3.86358e-14	1.05429e-10	0.128,0.231,0.22	0.026,0.0,0.009	0.181	18.1
8758	ENSG00000170703	TTLL6	17	-	48787788	48787999	48787810	48787999	48786163	48786335	8758	6,6,0	14,14,14	0,0,0	4,11,4	161	139	1.16609e-05	0.0015522	0.27,0.27,0.0	0.0,0.0,0.0	0.18	18
271	ENSG00000164683	HEY1	8	-	79766996	79767092	79767008	79767092	79766650	79766732	271	16,19,5	51,37,26	0,1,0	6,5,5	151	139	1.89823e-05	0.00220419	0.224,0.321,0.15	0.0,0.155,0.0	0.18	18
16993	ENSG00000188191	PRKAR1B	7	-	727014	727237	727209	727237	711328	711527	16993	96,94,52	13,23,13	109,88,69	41,51,26	334	139	0.000855177	0.0324432	0.754,0.63,0.625	0.525,0.418,0.525	0.18	18
31748	ENSG00000178038	ALS2CL	3	-	46681499	46681598	46681503	46681598	46681308	46681407	31748	40,27,27	10,12,3	11,10,12	1,0,0	143	139	5.94597e-06	0.000934789	0.795,0.686,0.897	0.914,1.0,1.0	-0.179	17.9
25275	ENSG00000137501	SYTL2	11	-	85724031	85727967	85727895	85727967	85720857	85720959	25275	735684533	22,23,18	362412341	25,23,28	4003	139	9.50567e-05	0.00702409	0.537,0.508,0.507	0.335,0.383,0.297	0.179	17.9
362	ENSG00000163660	CCNL1	3	-	157151728	157151930	157151916	157151930	157150281	157150381	362	213193160	4,12,8	64,49,40	7,11,6	327	139	0.000119345	0.00827463	0.958,0.872,0.895	0.795,0.654,0.739	0.179	17.9
9536	ENSG00000197885	NKIRAS1	3	-	23916783	23917065	23916932	23917065	23911328	23911450	9536	103,106,70	2,0,0	56,47,44	2,9,6	288	139	1.12406e-07	3.60861e-05	0.961,1.0,1.0	0.931,0.716,0.78	0.178	17.8
26177	ENSG00000153885	KCTD15	19	+	33798263	33798394	33798263	33798390	33798670	33798766	26177	4,7,0	7,16,10	1,0,0	7,8,10	143	139	0.000111103	0.00788933	0.357,0.298,0.0	0.122,0.0,0.0	0.178	17.8
341	ENSG00000233392	AC104809.4	2	-	240958916	240959122	240959076	240959122	240957361	240957617	341	49,41,28	33,29,24	67,87,72	25,29,27	299	139	0.000519073	0.0229516	0.408,0.397,0.352	0.555,0.582,0.554	-0.178	17.8
33443	ENSG00000099991	CABIN1	22	+	24098013	24098192	24098013	24098105	24113565	24113748	33443	90,79,60	6,18,4	71,80,87	19,38,19	226	139	0.000961427	0.0351094	0.902,0.73,0.902	0.697,0.564,0.738	0.178	17.8
5529	ENSG00000134291	TMEM106C	12	+	47966088	47966229	47966088	47966172	47967207	47967261	5529	44,52,31	0,1,0	23,33,28	4,7,3	196	139	4.14684e-07	0.000110015	1.0,0.974,1.0	0.803,0.77,0.869	0.177	17.7
7261	ENSG00000221947	XKR9	8	+	70669407	70669538	70669407	70669457	70706932	70707153	7261	23,14,33	3,5,0	18,17,17	0,0,0	220	139	0.000180995	0.0111705	0.829,0.639,1.0	1.0,1.0,1.0	-0.177	17.7
2307	ENSG00000076650	GPATCH1	19	+	33112485	33112613	33112485	33112579	33113766	33113903	2307	27,18,28	1,3,1	17,15,21	5,5,5	173	139	0.00151445	0.0486661	0.956,0.828,0.957	0.732,0.707,0.771	0.177	17.7
19737	ENSG00000153786	ZDHHC7	16	-	84988762	84988873	84988797	84988873	84981869	84981994	19737	37,30,15	7,5,5	29,24,24	2,1,0	174	139	0.000110979	0.00788933	0.809,0.827,0.706	0.921,0.95,1.0	-0.176	17.6
34364	ENSG00000162407	PLPP3	1	-	56516888	56517006	56516925	56517006	56511975	56512152	34364	1,3,4	10,10,9	0,0,0	1,7,4	176	139	0.000112287	0.00794389	0.073,0.192,0.26	0.0,0.0,0.0	0.175	17.5
41079	ENSG00000147403	RPL10	X	+	154398889	154399126	154398889	154398998	154399337	154399396	41079	34,25,21	0,0,0	22,17,22	1,5,1	267	139	0.00042247	0.0199288	1.0,1.0,1.0	0.92,0.639,0.92	0.174	17.4
9831	ENSG00000150093	ITGB1	10	-	32933350	32933583	32933481	32933583	32932510	32932600	9831	17,15,14	7,2,0	10,26,26	0,2,0	270	139	0.000891188	0.0333069	0.556,0.794,1.0	1.0,0.87,1.0	-0.173	17.3
30807	ENSG00000159214	CCDC24	1	+	43992319	43992426	43992319	43992377	43992522	43992639	30807	13,22,14	0,1,0	12,14,20	2,5,1	188	139	0.00018577	0.0114043	1.0,0.942,1.0	0.816,0.674,0.937	0.172	17.2
14252	ENSG00000122729	ACO1	9	+	32386370	32386442	32386370	32386438	32405484	32405603	14252	0,2,5	11,12,8	0,0,0	3,4,2	143	139	0.000853068	0.0324276	0.0,0.139,0.378	0.0,0.0,0.0	0.172	17.2
17030	ENSG00000111596	CNOT2	12	+	70301704	70301865	70301704	70301861	70310894	70311017	17030	18,16,10	4,3,5	16,16,17	2,1,0	143	139	0.000917699	0.0340377	0.814,0.838,0.66	0.886,0.94,1.0	-0.171	17.1
10474	ENSG00000095066	HOOK2	19	-	12774560	12774741	12774668	12774741	12772873	12773044	10474	112103106	135149109	43,40,38	114137150	247	139	1.67667e-11	1.88394e-08	0.318,0.28,0.354	0.175,0.141,0.125	0.17	17
37474	ENSG00000144445	KANSL1L	2	-	210171148	210171327	210171184	210171327	210153494	210154611	37474	20,20,12	8,2,2	28,20,18	0,2,0	175	139	5.80325e-05	0.0049049	0.665,0.888,0.827	1.0,0.888,1.0	-0.169	16.9
15025	ENSG00000126214	KLC1	14	+	103679407	103679545	103679407	103679518	103700654	103700727	15025	89,83,41	65,62,43	74,61,65	23,26,33	166	139	0.000528526	0.0231286	0.534,0.529,0.444	0.729,0.663,0.623	-0.169	16.9
1435	ENSG00000137133	HINT2	9	-	35815006	35815354	35815128	35815354	35813643	35813784	1435	71,71,53	3,0,3	37,51,33	6,5,7	261	139	0.000173116	0.0107712	0.926,1.0,0.904	0.767,0.845,0.715	0.168	16.8
19705	ENSG00000182180	MRPS16	10	-	73252119	73252324	73252258	73252324	73251762	73252023	19705	33,30,14	0,0,3	17,22,17	2,6,3	278	139	0.00112768	0.0394883	1.0,1.0,0.7	0.81,0.647,0.739	0.168	16.8
7023	ENSG00000183010	PYCR1	17	-	81937241	81937300	81937257	81937300	81936747	81936861	7023	0,2,0	17,10,10	3,6,6	13,16,18	155	139	6.16975e-05	0.00512398	0.0,0.152,0.0	0.171,0.252,0.23	-0.167	16.7
34761	ENSG00000069998	CECR5	22	-	17158370	17158494	17158456	17158494	17149541	17149745	34761	7,12,6	21,17,17	3,1,4	28,24,35	225	139	6.20706e-05	0.00512679	0.171,0.304,0.179	0.062,0.025,0.066	0.167	16.7
40320	ENSG00000157214	STEAP2	7	+	90212275	90212459	90212275	90212336	90216490	90216603	40320	79,84,32	1,2,1	20,38,48	5,4,4	262	139	0.000213751	0.0126367	0.977,0.957,0.944	0.68,0.834,0.864	0.167	16.7
18823	ENSG00000114850	SSR3	3	-	156554702	156554845	156554736	156554845	156553654	156553781	18823	7,3,1	17,14,7	0,0,0	6,5,8	173	139	1.28879e-05	0.00165777	0.249,0.147,0.103	0.0,0.0,0.0	0.166	16.6
12210	ENSG00000111666	CHPT1	12	+	101720122	101720259	101720122	101720174	101723167	101723326	12210	10,9,5	4,3,0	5,8,4	1,0,0	224	139	7.13805e-05	0.00569301	0.608,0.651,1.0	0.756,1.0,1.0	-0.166	16.6
9636	ENSG00000130724	CHMP2A	19	-	58554816	58554973	58554841	58554973	58554045	58554236	9636	30,18,18	0,0,1	19,11,18	2,3,4	164	139	7.61039e-05	0.00596767	1.0,1.0,0.938	0.89,0.757,0.792	0.166	16.6
2244	ENSG00000126432	PRDX5	11	+	64320662	64320797	64320662	64320717	64320864	64321067	2244	21,22,8	1,5,1	11,14,7	0,0,0	219	139	0.000427152	0.0199811	0.93,0.736,0.835	1.0,1.0,1.0	-0.166	16.6
32555	ENSG00000156171	DRAM2	1	-	111120515	111120596	111120531	111120596	111119876	111119959	32555	67,66,63	27,25,29	62,99,39	5,15,10	155	139	5.20896e-05	0.00459579	0.69,0.703,0.661	0.917,0.855,0.778	-0.165	16.5
3681	ENSG00000120868	APAF1	12	+	98648625	98648815	98648625	98648782	98649486	98649684	3681	15,15,15	0,4,4	15,12,14	0,0,0	172	139	9.08324e-05	0.00679075	1.0,0.752,0.752	1.0,1.0,1.0	-0.165	16.5
15846	ENSG00000031698	SARS	1	+	109236804	109236879	109236804	109236870	109237243	109237373	15846	3,5,6	29,25,12	0,0,3	18,33,36	148	139	0.000108061	0.00774532	0.089,0.158,0.32	0.0,0.0,0.073	0.165	16.5
33614	ENSG00000168070	C11orf85	11	-	64954042	64954802	64954756	64954802	64947787	64947819	33614	55,93,43	4,2,2	22,34,29	0,1,0	853	139	0.000520804	0.0230015	0.691,0.883,0.778	1.0,0.847,1.0	-0.165	16.5
24883	ENSG00000129353	SLC44A2	19	+	10634755	10635073	10634755	10634887	10636322	10636585	24883	23,27,12	3,4,2	12,6,9	0,1,0	325	139	0.000246382	0.013842	0.766,0.743,0.72	1.0,0.72,1.0	-0.164	16.4
40431	ENSG00000259065	RP5-1021I20.1	14	+	73787359	73787524	73787359	73787509	73789026	73789116	40431	6,2,2	11,17,9	0,1,0	4,8,4	154	139	0.000285587	0.0150486	0.33,0.096,0.167	0.0,0.101,0.0	0.164	16.4
9236	ENSG00000175455	CCDC14	3	-	123956648	123956795	123956739	123956795	123956354	123956427	9236	50,60,26	64,80,44	17,23,9	97,51,50	230	139	1.25998e-06	0.000276637	0.321,0.312,0.263	0.096,0.214,0.098	0.163	16.3
33609	ENSG00000168070	C11orf85	11	-	64954042	64954802	64954695	64954802	64947373	64947465	33609	51,78,39	2,6,0	16,31,27	0,0,0	792	139	3.42745e-05	0.00334028	0.817,0.695,1.0	1.0,1.0,1.0	-0.163	16.3
15816	ENSG00000131470	PSMC3IP	17	-	42573818	42574210	42574138	42574210	42573481	42573623	15816	46,52,43	2,0,0	34,59,37	2,3,5	459	139	0.000254255	0.0141764	0.874,1.0,1.0	0.837,0.856,0.691	0.163	16.3
33602	ENSG00000168070	C11orf85	11	-	64971876	64972023	64972009	64972023	64954756	64954802	33602	80,103,75	5,1,1	34,34,29	7,4,3	272	139	0.000318054	0.0161363	0.891,0.981,0.975	0.713,0.813,0.832	0.163	16.3
15554	ENSG00000183513	COA5	2	-	98608341	98608515	98608397	98608515	98604138	98604191	15554	85,57,61	9,12,9	43,66,45	17,18,20	195	139	0.000746007	0.0295275	0.871,0.772,0.829	0.643,0.723,0.616	0.163	16.3
997	ENSG00000272752	STAG3L5P-PVRIG2P-PILRB	7	+	100351257	100351423	100351257	100351410	100352162	100352478	997	65,45,36	63,70,46	11,22,20	43,44,47	152	139	0.00136177	0.0451596	0.485,0.37,0.417	0.19,0.314,0.28	0.163	16.3
6566	ENSG00000189366	ALG1L	3	-	125933547	125933696	125933574	125933696	125932649	125932709	6566	1,0,0	13,5,8	3,6,1	16,10,10	166	139	0.000125183	0.00860137	0.061,0.0,0.0	0.136,0.334,0.077	-0.162	16.2
40427	ENSG00000259065	RP5-1021I20.1	14	+	73787359	73787521	73787359	73787509	73789026	73789116	40427	5,2,1	11,17,9	0,0,0	4,8,4	151	139	0.000148364	0.00973875	0.295,0.098,0.093	0.0,0.0,0.0	0.162	16.2
11939	ENSG00000144134	RABL2A	2	+	113641352	113641480	113641352	113641450	113641780	113641864	11939	5,4,5	18,19,11	0,0,2	2,13,12	169	139	0.000349017	0.017249	0.186,0.148,0.272	0.0,0.0,0.121	0.162	16.2
6234	ENSG00000241404	EGFL8	6	+	32167618	32167650	32167618	32167625	32167909	32168281	6234	11,12,5	0,3,4	4,1,6	1,0,0	164	139	0.000478306	0.0217641	1.0,0.772,0.514	0.772,1.0,1.0	-0.162	16.2
26651	ENSG00000267216	AC010642.1	19	+	58278965	58280609	58278965	58279147	58285716	58285843	26651	55,63,47	11,19,10	20,28,19	20,14,14	1601	139	3.27498e-05	0.00326669	0.303,0.224,0.29	0.08,0.148,0.105	0.161	16.1
24716	ENSG00000100889	PCK2	14	+	24094193	24094438	24094193	24094254	24096891	24097125	24716	4,4,0	7,3,5	0,0,1	3,3,5	323	139	0.00104192	0.0371807	0.197,0.365,0.0	0.0,0.0,0.079	0.161	16.1
20006	ENSG00000011258	MBTD1	17	-	51259798	51259941	51259834	51259941	51259142	51259206	20006	7,11,7	40,42,18	2,0,0	30,23,14	175	139	1.60347e-06	0.00034222	0.122,0.172,0.236	0.05,0.0,0.0	0.16	16
13673	ENSG00000163728	TTC14	3	+	180607647	180608271	180607647	180607765	180608700	180608780	13673	147153117	46,34,44	57,48,36	34,35,19	645	139	0.000232631	0.0133844	0.408,0.492,0.364	0.265,0.228,0.29	0.16	16
21617	ENSG00000064607	SUGP2	19	-	18993637	18993799	18993647	18993799	18991339	18991540	21617	14,13,10	0,0,0	8,11,12	0,5,2	149	139	0.000539461	0.0235532	1.0,1.0,1.0	1.0,0.672,0.848	0.16	16
11642	ENSG00000278610	RP11-455P21.3	1	+	222815063	222815171	222815063	222815078	222823883	222823945	11642	13,10,13	1,7,3	9,11,4	1,0,1	232	139	0.000948574	0.0348111	0.886,0.461,0.722	0.844,1.0,0.706	-0.16	16
8872	ENSG00000215190	LINC00680	6	-	57949858	57950011	57949903	57950011	57948872	57949068	8872	19,26,13	2,7,1	3,1,6	0,0,0	184	139	3.14637e-05	0.00318835	0.878,0.737,0.908	1.0,1.0,1.0	-0.159	15.9
23634	ENSG00000197530	MIB2	1	+	1616507	1616737	1616507	1616614	1617077	1617323	23634	15,38,20	5,2,0	42,27,30	0,0,0	262	139	0.00117934	0.0408101	0.614,0.91,1.0	1.0,1.0,1.0	-0.159	15.9
25114	ENSG00000242082	RP1-90G24.10	22	+	32205114	32205247	32205114	32205235	32207135	32207276	25114	10,11,3	0,0,0	14,25,9	4,1,2	151	139	0.00136527	0.0452362	1.0,1.0,1.0	0.763,0.958,0.806	0.158	15.8
17424	ENSG00000261717	RP11-77K12.1	16	-	75464531	75464706	75464671	75464706	75451737	75451839	17424	19,14,17	3,0,4	8,16,20	0,0,1	279	139	0.000566124	0.0244657	0.759,1.0,0.679	1.0,1.0,0.909	-0.157	15.7
30380	ENSG00000167103	PIP5KL1	9	-	127925866	127925979	127925957	127925979	127925106	127925260	30380	52,56,37	0,4,1	26,15,21	8,0,5	230	139	0.00148027	0.0480058	1.0,0.894,0.957	0.663,1.0,0.717	0.157	15.7
17575	ENSG00000198001	IRAK4	12	+	43772911	43773072	43772911	43772986	43773964	43774029	17575	68,72,61	16,11,15	102,65,73	2,1,14	225	139	0.000586191	0.0249936	0.724,0.802,0.715	0.969,0.976,0.763	-0.156	15.6
39702	ENSG00000176731	C8orf59	8	-	85219212	85219363	85219322	85219363	85217385	85217502	39702	114,123,62	26,28,15	91,61,86	41,35,31	249	139	0.000860968	0.0325982	0.71,0.71,0.698	0.553,0.493,0.608	0.155	15.5
3833	ENSG00000137337	MDC1	6	-	30707565	30708357	30708135	30708357	30707383	30707454	3833	315237216	7,10,13	207179223	12,24,23	709	139	0.00102779	0.0367647	0.898,0.823,0.765	0.772,0.594,0.655	0.155	15.5
6043	ENSG00000277072	STAG3L2	7	-	74890270	74890566	74890387	74890566	74888311	74888397	6043	59,70,66	97,140,89	13,18,10	86,70,55	256	139	5.56981e-09	3.08382e-06	0.248,0.214,0.287	0.076,0.123,0.09	0.153	15.3
6777	ENSG00000141994	DUS3L	19	-	5786748	5787171	5787060	5787171	5786466	5786542	6777	149111106	13,9,13	85,78,88	6,0,2	451	139	0.00122679	0.0417711	0.779,0.792,0.715	0.814,1.0,0.931	-0.153	15.3
13517	ENSG00000022556	NLRP2	19	+	54990021	54990393	54990021	54990192	54990501	54990642	13517	36,44,17	59,57,38	11,4,7	65,50,67	340	139	2.22216e-11	2.35814e-08	0.2,0.24,0.155	0.065,0.032,0.041	0.152	15.2
18137	ENSG00000134419	RPS15A	16	-	18790243	18790334	18790309	18790334	18788985	18789118	18137	14461506945	241247273	95610881170	469473402	205	139	5.6603e-10	4.50501e-07	0.803,0.805,0.701	0.58,0.609,0.664	0.152	15.2
13506	ENSG00000147454	SLC25A37	8	+	23566107	23566813	23566107	23566336	23568321	23568378	13506	300364282	18,10,14	224248202	18,31,23	616	139	7.42099e-05	0.00586472	0.79,0.891,0.82	0.737,0.644,0.665	0.152	15.2
3015	ENSG00000163938	GNL3	3	+	52686048	52686059	52686048	52686055	52686768	52686827	3015	1,13,5	21,25,13	0,2,0	7,8,14	143	139	0.000275265	0.0148447	0.044,0.336,0.272	0.0,0.195,0.0	0.152	15.2
15089	ENSG00000182923	CEP63	3	+	134547386	134547472	134547386	134547468	134549061	134549176	15089	23,33,19	5,6,3	16,36,31	0,1,0	143	139	3.84694e-06	0.000683557	0.817,0.842,0.86	1.0,0.972,1.0	-0.151	15.1
31629	ENSG00000091127	PUS7	7	-	105470687	105470848	105470760	105470848	105468328	105468463	31629	136,155,50	16,10,17	90173112	0,5,7	212	139	2.66061e-05	0.00284391	0.848,0.91,0.659	1.0,0.958,0.913	-0.151	15.1
16695	ENSG00000153094	BCL2L11	2	+	111122693	111122933	111122693	111122923	111123732	111123766	16695	1,2,0	15,26,23	9,3,0	12,14,9	149	139	0.000938303	0.0345337	0.059,0.067,0.0	0.412,0.167,0.0	-0.151	15.1
17739	ENSG00000183011	NAA38	17	-	7857505	7857722	7857694	7857722	7856959	7857198	17739	149,144,65	0,4,0	93,98,100	8,13,5	328	139	2.63739e-07	7.51912e-05	1.0,0.938,1.0	0.831,0.762,0.894	0.15	15
9637	ENSG00000130724	CHMP2A	19	-	58554814	58554973	58554841	58554973	58554045	58554236	9637	27,18,9	0,0,1	15,12,19	2,3,4	166	139	9.7249e-05	0.00711725	1.0,1.0,0.883	0.863,0.77,0.799	0.15	15
7016	ENSG00000183010	PYCR1	17	-	81936667	81936861	81936735	81936861	81936122	81936193	7016	26,9,13	0,2,0	12,8,4	6,2,0	207	139	0.00052468	0.0230926	1.0,0.751,1.0	0.573,0.729,1.0	0.15	15
5291	ENSG00000261740	RP11-345J4.5	16	-	29452108	29454113	29454015	29454113	29444397	29444499	5291	9,14,13	8,4,2	5,3,4	7,9,5	2046	139	0.00105612	0.0376021	0.071,0.192,0.306	0.046,0.022,0.052	0.15	15
18370	ENSG00000169684	CHRNA5	15	+	78589804	78589982	78589804	78589849	78593091	78593535	18370	12,18,18	0,0,1	27,26,19	3,2,3	272	139	0.000471994	0.0215689	1.0,1.0,0.902	0.821,0.869,0.764	0.149	14.9
206	ENSG00000197958	RPL12	9	-	127450538	127450679	127450588	127450679	127449609	127449708	206	16,17,12	3,4,0	8,12,7	0,0,0	189	139	0.000582368	0.024914	0.797,0.758,1.0	1.0,1.0,1.0	-0.148	14.8
25304	ENSG00000105953	OGDH	7	+	44618823	44619046	44618823	44618934	44624316	44624565	25304	0,3,0	5,12,11	4,4,6	14,14,8	251	139	0.0014737	0.0480058	0.0,0.122,0.0	0.137,0.137,0.293	-0.148	14.8
2363	ENSG00000105486	LIG1	19	-	48120166	48121322	48121169	48121322	48119136	48119190	2363	64,50,46	25,23,18	19,34,18	45,30,28	1142	139	1.22709e-08	5.58079e-06	0.238,0.209,0.237	0.049,0.121,0.073	0.147	14.7
12331	ENSG00000118181	RPS25	11	-	119017895	119018064	119017924	119018064	119017361	119017545	12331	30,42,14	72,73,52	9,7,5	49,46,51	168	139	3.87543e-05	0.00365563	0.256,0.323,0.182	0.132,0.112,0.075	0.147	14.7
3783	ENSG00000182400	TRAPPC6B	14	-	39159449	39159550	39159482	39159550	39158284	39158402	3783	48,57,56	135,138,68	17,20,17	105,79,81	172	139	0.000102096	0.00738705	0.223,0.25,0.4	0.116,0.17,0.145	0.147	14.7
36707	ENSG00000126870	WDR60	7	+	158902375	158905283	158902375	158902595	158905988	158906091	36707	208192148	24,31,23	43,54,38	14,19,21	2827	139	1.1965e-06	0.000264218	0.299,0.233,0.24	0.131,0.123,0.082	0.145	14.5
41086	ENSG00000147403	RPL10	X	+	154398889	154399126	154398889	154399113	154399337	154399396	41086	5,9,5	43,31,17	4,2,1	71,74,93	152	139	4.22681e-06	0.000724112	0.096,0.21,0.212	0.049,0.024,0.01	0.145	14.5
4680	ENSG00000156042	CFAP70	10	-	73291225	73291444	73291370	73291444	73278178	73278337	4680	63,53,27	2,6,5	14,21,19	0,1,0	284	139	0.000160668	0.0102642	0.939,0.812,0.725	1.0,0.911,1.0	-0.145	14.5
17909	ENSG00000133422	MORC2	22	-	30928018	30928207	30928027	30928207	30926610	30926871	17909	72,85,70	16,12,16	49,66,81	33,27,23	148	139	0.00151464	0.0486661	0.809,0.869,0.804	0.582,0.697,0.768	0.145	14.5
5377	ENSG00000269713	NBPF9	1	-	149065525	149065689	149065636	149065689	149064430	149064482	5377	38,26,26	0,3,7	35,14,26	0,0,1	250	139	0.000139367	0.00929185	1.0,0.828,0.674	1.0,1.0,0.935	-0.144	14.4
37576	ENSG00000185163	DDX51	12	-	132141102	132141420	132141274	132141420	132140830	132141020	37576	46,26,33	46,44,28	14,34,12	56,51,49	311	139	0.000498722	0.0223164	0.309,0.209,0.345	0.101,0.23,0.099	0.144	14.4
9789	ENSG00000166562	SEC11C	18	+	59148178	59148231	59148178	59148223	59149512	59149622	9789	9,17,9	5,1,3	7,3,2	0,1,0	147	139	0.00033672	0.0168594	0.63,0.941,0.739	1.0,0.739,1.0	-0.143	14.3
12058	ENSG00000183049	CAMK1D	10	+	12825572	12825694	12825572	12825690	12828768	12829736	12058	14,24,17	95,68,55	36,32,14	53,56,34	143	139	0.00085752	0.0324998	0.125,0.255,0.231	0.398,0.357,0.286	-0.143	14.3
32541	ENSG00000163932	PRKCD	3	+	53156339	53156522	53156339	53156484	53178403	53178537	32541	1,0,0	10,18,5	0,3,7	9,14,10	177	139	0.000153467	0.00997821	0.073,0.0,0.0	0.0,0.144,0.355	-0.142	14.2
1872	ENSG00000219200	RNASEK	17	+	7013318	7013555	7013318	7013516	7013665	7013742	1872	9,9,16	47,44,25	0,3,8	59,56,39	178	139	0.000126103	0.00864901	0.13,0.138,0.333	0.0,0.04,0.138	0.141	14.1
19706	ENSG00000182180	MRPS16	10	-	73252119	73252324	73252238	73252324	73251762	73252023	19706	27,20,12	1,6,0	15,21,16	0,0,0	258	139	0.00100107	0.0360791	0.936,0.642,1.0	1.0,1.0,1.0	-0.141	14.1
27479	ENSG00000133612	AGAP3	7	+	151117635	151117772	151117635	151117749	151118209	151118344	27479	68,57,34	19,9,12	83,78,80	10,7,4	162	139	0.000330325	0.0166045	0.754,0.845,0.709	0.877,0.905,0.945	-0.14	14
38198	ENSG00000188976	NOC2L	1	-	954416	954523	954463	954523	954003	954082	38198	12,14,8	27,29,37	8,6,2	67,35,38	186	139	0.000367994	0.0180933	0.249,0.265,0.139	0.082,0.114,0.038	0.14	14
26848	ENSG00000171823	FBXL14	12	-	1592867	1593038	1592914	1593038	1587360	1587536	26848	55,46,28	7,4,8	29,35,45	0,0,4	186	139	0.000595172	0.0252777	0.854,0.896,0.723	1.0,1.0,0.894	-0.14	14
24403	ENSG00000178982	EIF3K	19	+	38632429	38632673	38632429	38632496	38634992	38635118	24403	22,21,11	35,27,17	1,2,4	12,14,8	316	139	0.000648164	0.0270326	0.217,0.255,0.222	0.035,0.059,0.18	0.14	14
35433	ENSG00000101444	AHCY	20	-	34301689	34301875	34301757	34301875	34295394	34295585	35433	11,5,4	24,24,13	1,5,0	20,38,35	207	139	0.000109887	0.00783211	0.235,0.123,0.171	0.032,0.081,0.0	0.139	13.9
17801	ENSG00000205981	DNAJC19	3	-	180989331	180989518	180989422	180989518	180988181	180988229	17801	11,11,11	2,2,3	9,3,4	0,1,0	230	139	0.000699291	0.02839	0.769,0.769,0.689	1.0,0.645,1.0	-0.139	13.9
4288	ENSG00000182004	SNRPE	1	+	203862181	203862264	203862181	203862226	203863662	203863725	4288	1,5,3	6,13,12	2,0,0	15,10,10	177	139	0.000849952	0.0323414	0.116,0.232,0.164	0.095,0.0,0.0	0.139	13.9
5589	ENSG00000149636	DSN1	20	-	36773480	36773720	36773661	36773720	36767968	36768042	5589	50,43,35	2,0,0	23,45,29	2,1,5	320	139	0.00101948	0.0365357	0.916,1.0,1.0	0.833,0.951,0.716	0.139	13.9
27531	ENSG00000120699	EXOSC8	13	+	37003494	37003651	37003494	37003517	37004515	37004525	27531	84,78,60	9,7,3	8,21,18	0,0,0	273	139	1.21515e-05	0.00158981	0.826,0.85,0.911	1.0,1.0,1.0	-0.138	13.8
29207	ENSG00000215039	CD27-AS1	12	-	6450340	6450980	6450892	6450980	6448639	6448737	29207	615658460	44,55,41	498412377	67,54,70	691	139	3.56073e-05	0.00342646	0.738,0.706,0.693	0.599,0.605,0.52	0.138	13.8
16300	ENSG00000064270	ATP2C2	16	+	84459180	84459391	84459180	84459188	84460653	84460801	16300	30,33,26	2,5,0	9,12,12	0,0,0	342	139	0.000753711	0.0297152	0.859,0.728,1.0	1.0,1.0,1.0	-0.138	13.8
21322	ENSG00000074582	BCS1L	2	+	218660306	218660475	218660306	218660421	218660938	218660966	21322	30,24,15	40,39,34	21,12,8	49,70,36	193	139	0.00128839	0.0433277	0.351,0.307,0.241	0.236,0.11,0.138	0.138	13.8
12837	ENSG00000148399	DPH7	9	-	137575708	137576167	137576079	137576167	137574751	137574846	12837	323344208	11,10,3	128154142	11,16,7	510	139	0.000219013	0.0127935	0.889,0.904,0.95	0.76,0.724,0.847	0.137	13.7
18640	ENSG00000177595	PIDD1	11	-	805037	805230	805178	805230	802681	804463	18640	0,5,6	7,13,9	0,0,0	11,21,12	280	139	1.19756e-05	0.00157739	0.0,0.16,0.249	0.0,0.0,0.0	0.136	13.6
19459	ENSG00000004777	ARHGAP33	19	+	35782761	35782901	35782761	35782869	35784171	35784317	19459	1,0,0	24,24,10	0,6,2	9,13,8	171	139	0.000301941	0.0155669	0.033,0.0,0.0	0.0,0.273,0.169	-0.136	13.6
40385	ENSG00000100902	PSMA6	14	+	35292348	35292565	35292348	35292548	35307993	35308088	40385	46,21,40	13,4,12	42,54,33	2,2,6	156	139	0.000478544	0.0217641	0.759,0.824,0.748	0.949,0.96,0.831	-0.136	13.6
25366	ENSG00000135040	NAA35	9	+	85941181	85941405	85941181	85941269	85942154	85942283	25366	37,32,21	3,2,2	36,14,18	0,0,0	275	139	0.000763274	0.0300612	0.862,0.89,0.841	1.0,1.0,1.0	-0.136	13.6
24422	ENSG00000156253	RWDD2B	21	-	29008239	29008621	29008394	29008621	29007760	29008123	24422	162,138,93	114,100,63	130137129	67,42,54	294	139	0.00095635	0.0350328	0.402,0.395,0.411	0.478,0.607,0.53	-0.136	13.6
5033	ENSG00000137074	APTX	9	-	33001515	33001612	33001566	33001612	32989758	32989895	5033	26,14,13	64,44,33	8,8,11	79,84,71	190	139	6.18053e-06	0.000959817	0.229,0.189,0.224	0.069,0.065,0.102	0.135	13.5
24762	ENSG00000198556	ZNF789	7	+	99472934	99473056	99472934	99472935	99476402	99476480	24762	71,54,55	2,1,0	39,66,32	3,4,6	260	139	0.000177958	0.0110366	0.95,0.967,1.0	0.874,0.898,0.74	0.135	13.5
27806	ENSG00000131469	RPL27	17	+	42998749	42998912	42998749	42998825	42999932	43000102	27806	28,21,32	0,0,0	30,27,20	4,3,1	226	139	0.000221151	0.0128972	1.0,1.0,1.0	0.822,0.847,0.925	0.135	13.5
1986	ENSG00000137343	ATAT1	6	+	30640534	30640669	30640534	30640603	30642175	30642247	1986	3,10,8	23,25,16	3,3,0	34,22,23	205	139	0.000515967	0.0228646	0.081,0.213,0.253	0.056,0.085,0.0	0.135	13.5
18001	ENSG00000170638	TRABD	22	+	50185917	50186045	50185917	50186005	50193026	50193093	18001	0,1,1	18,11,4	2,4,4	9,18,6	179	139	0.000661764	0.0274499	0.0,0.066,0.163	0.147,0.147,0.341	-0.135	13.5
40389	ENSG00000100902	PSMA6	14	+	35292450	35292600	35292450	35292548	35307993	35308088	40389	48,26,46	13,4,12	45,54,33	2,2,6	191	139	0.001472	0.0480058	0.729,0.825,0.736	0.942,0.952,0.8	-0.135	13.5
34905	ENSG00000128191	DGCR8	22	+	20089668	20089843	20089668	20089811	20089975	20090258	34905	16,14,12	67,63,55	1,1,4	58,85,75	171	139	1.16812e-09	7.82906e-07	0.163,0.153,0.151	0.014,0.009,0.042	0.134	13.4
4599	ENSG00000151500	THYN1	11	-	134253037	134253248	134253226	134253248	134252839	134252916	4599	65,65,39	62,76,53	22,64,41	99111117	328	139	2.34861e-06	0.000465411	0.308,0.266,0.238	0.086,0.196,0.129	0.134	13.4
5771	ENSG00000137411	VARS2	6	+	30914251	30914465	30914251	30914344	30914804	30915037	5771	10,17,9	30,21,23	2,10,10	56,47,46	260	139	0.000283806	0.0150295	0.151,0.302,0.173	0.019,0.102,0.104	0.134	13.4
33489	ENSG00000071462	WBSCR22	7	+	73683608	73683850	73683608	73683673	73686635	73686731	33489	6,8,8	10,16,23	1,1,5	24,24,23	316	139	0.000199831	0.0119284	0.209,0.18,0.133	0.018,0.018,0.087	0.133	13.3
5561	ENSG00000164967	RPP25L	9	-	34611859	34612104	34612063	34612104	34610485	34611332	5561	183215124	57,53,43	178216142	102,90,79	343	139	0.000237059	0.0135218	0.565,0.622,0.539	0.414,0.493,0.421	0.133	13.3
28310	ENSG00000155508	CNOT8	5	+	154858638	154858816	154858638	154858768	154863206	154863395	28310	90,99,71	158157120	80,83,48	242243246	187	139	1.4124e-07	4.45934e-05	0.297,0.319,0.305	0.197,0.202,0.127	0.132	13.2
28405	ENSG00000232956	SNHG15	7	-	44985881	44986097	44986020	44986097	44984289	44984426	28405	71,91,60	173203118	96109100	115110104	278	139	2.12739e-07	6.34944e-05	0.17,0.183,0.203	0.294,0.331,0.325	-0.131	13.1
24624	ENSG00000136824	SMC2	9	+	104094325	104094477	104094325	104094350	104095323	104095552	24624	32,52,54	0,0,0	73,55,34	2,4,5	266	139	2.88955e-05	0.00302437	1.0,1.0,1.0	0.95,0.878,0.78	0.131	13.1
30104	ENSG00000168958	MFF	2	+	227328677	227328899	227328677	227328789	227329605	227329783	30104	7,5,11	33,27,16	0,2,1	18,23,13	249	139	5.36544e-05	0.00466916	0.106,0.094,0.277	0.0,0.046,0.041	0.13	13
33422	ENSG00000229117	RPL41	12	+	56116774	56116930	56116774	56116829	56117188	56117207	33422	225192185	77,77,49	168168124	82,95,82	240	139	0.000305624	0.0156511	0.629,0.591,0.686	0.543,0.506,0.467	0.13	13
4535	ENSG00000172943	PHF8	X	-	53985744	53985946	53985848	53985946	53984913	53985227	4535	35,46,25	8,3,0	33,36,27	0,0,0	243	139	2.22768e-05	0.00248117	0.714,0.898,1.0	1.0,1.0,1.0	-0.129	12.9
26750	ENSG00000137822	TUBGCP4	15	+	43403682	43403885	43403682	43403799	43404412	43404552	26750	27,17,11	40,51,37	6,5,11	57,62,47	225	139	5.06012e-05	0.00451663	0.294,0.171,0.155	0.061,0.047,0.126	0.129	12.9
8858	ENSG00000143621	ILF2	1	-	153663087	153663276	153663214	153663276	153662691	153662795	8858	30,33,31	0,4,4	20,36,25	0,0,0	266	139	0.000268639	0.0145986	1.0,0.812,0.802	1.0,1.0,1.0	-0.129	12.9
15942	ENSG00000105821	DNAJC2	7	-	103327145	103327378	103327331	103327378	103326542	103326684	15942	10,2,10	12,24,13	0,1,2	9,4,13	325	139	0.000665931	0.0275264	0.263,0.034,0.248	0.0,0.097,0.062	0.129	12.9
29543	ENSG00000169241	SLC50A1	1	+	155136285	155136396	155136285	155136376	155137978	155138098	29543	4,8,2	22,25,13	1,2,0	32,26,24	159	139	8.09569e-05	0.00624807	0.137,0.219,0.119	0.027,0.063,0.0	0.128	12.8
9635	ENSG00000130724	CHMP2A	19	-	58554809	58554973	58554841	58554973	58554045	58554236	9635	29,20,15	0,0,1	19,16,26	2,3,4	171	139	0.000182646	0.0112542	1.0,1.0,0.924	0.885,0.813,0.841	0.128	12.8
37687	ENSG00000180891	CUEDC1	17	-	57867356	57867630	57867622	57867630	57866473	57866544	37687	71,65,52	1,0,0	52,54,26	3,4,1	405	139	0.000242021	0.0136774	0.961,1.0,1.0	0.856,0.822,0.899	0.128	12.8
15180	ENSG00000120705	ETF1	5	-	138542704	138542936	138542737	138542936	138518691	138518867	15180	23,32,21	1,0,0	15,33,20	7,2,0	172	139	0.00055284	0.0240274	0.949,1.0,1.0	0.634,0.93,1.0	0.128	12.8
26037	ENSG00000197375	SLC22A5	5	+	132384146	132384320	132384146	132384301	132385327	132385499	26037	9,11,17	51,63,33	6,5,8	63,94,85	158	139	0.000291334	0.0152463	0.134,0.133,0.312	0.077,0.045,0.076	0.127	12.7
26182	ENSG00000116754	SRSF11	1	+	70231094	70231203	70231094	70231194	70232267	70232376	26182	14,10,8	8,0,0	4,5,5	0,0,0	148	139	0.00131556	0.0439321	0.622,1.0,1.0	1.0,1.0,1.0	-0.126	12.6
36901	ENSG00000162909	CAPN2	1	+	223769840	223770525	223769840	223769909	223771808	223771925	36901	308279250	84,95,70	145162135	84,86,65	755	139	1.66336e-05	0.00202236	0.403,0.351,0.397	0.241,0.258,0.277	0.125	12.5
12251	ENSG00000116898	MRPS15	1	-	36464212	36464345	36464218	36464345	36463805	36463850	12251	45,44,38	8,7,9	98,82,85	4,2,5	145	139	2.98467e-05	0.00307948	0.844,0.858,0.802	0.959,0.975,0.942	-0.124	12.4
18233	ENSG00000165238	WNK2	9	+	93308500	93308584	93308500	93308551	93308720	93309195	18233	53,58,33	1,2,0	30,25,37	7,0,8	172	139	3.37098e-05	0.00331057	0.977,0.959,1.0	0.776,1.0,0.789	0.124	12.4
28373	ENSG00000137996	RTCA	1	+	100267499	100267580	100267499	100267538	100268151	100268295	28373	0,5,7	15,20,12	1,0,0	7,10,4	181	139	0.000316591	0.0160834	0.0,0.161,0.309	0.099,0.0,0.0	0.124	12.4
26940	ENSG00000170017	ALCAM	3	+	105550126	105550357	105550126	105550259	105552467	105552585	26940	15,9,7	39,33,17	0,5,2	18,35,16	237	139	0.000496404	0.0222895	0.184,0.138,0.195	0.0,0.077,0.068	0.124	12.4
30070	ENSG00000196535	MYO18A	17	-	29096760	29097350	29097222	29097350	29094935	29095059	30070	203217139	2,5,17	146210147	1,0,3	601	139	0.000192976	0.011702	0.959,0.909,0.654	0.971,1.0,0.919	-0.123	12.3
27809	ENSG00000131469	RPL27	17	+	42998808	42999000	42998808	42998825	42999932	43000102	27809	44,57,55	0,0,0	49,38,35	4,3,1	314	139	0.000280193	0.01495	1.0,1.0,1.0	0.844,0.849,0.939	0.123	12.3
125	ENSG00000140374	ETFA	15	-	76284804	76284927	76284852	76284927	76283756	76283825	125	27,16,13	4,4,1	8,14,18	1,0,0	187	139	0.000314182	0.0160036	0.834,0.748,0.906	0.856,1.0,1.0	-0.123	12.3
25331	ENSG00000111665	CDCA3	12	-	6849322	6849858	6849564	6849858	6849003	6849198	25331	223193157	36,36,26	273295247	22,20,30	381	139	0.000393105	0.0189361	0.693,0.662,0.688	0.819,0.843,0.75	-0.123	12.3
35446	ENSG00000278540	ACACA	17	-	37289415	37289528	37289417	37289528	37284837	37284970	35446	0,2,0	20,32,11	4,5,0	18,15,9	141	139	0.000428874	0.0199811	0.0,0.058,0.0	0.18,0.247,0.0	-0.123	12.3
34252	ENSG00000033867	SLC4A7	3	-	27433915	27434104	27433954	27434104	27424036	27424152	34252	54,29,28	4,3,5	49,47,33	1,0,0	178	139	3.19271e-05	0.00321184	0.913,0.883,0.814	0.975,1.0,1.0	-0.122	12.2
671	ENSG00000186376	ZNF75D	X	-	135341767	135344087	135343260	135344087	135295767	135295922	671	399365289	0,0,1	221211153	0,9,1	1632	139	6.71253e-05	0.00545614	1.0,1.0,0.961	1.0,0.666,0.929	0.122	12.2
15600	ENSG00000088899	RP5-1187M17.10	20	-	3173359	3173546	3173454	3173546	3167776	3167961	15600	5,1,5	6,7,6	0,0,1	15,4,1	234	139	0.000109615	0.00783211	0.331,0.078,0.331	0.0,0.0,0.373	0.122	12.2
29427	ENSG00000180376	CCDC66	3	+	56613588	56613754	56613588	56613750	56615127	56615153	29427	5,10,3	48,22,17	0,0,2	15,25,9	143	139	0.000135935	0.0090789	0.092,0.306,0.146	0.0,0.0,0.178	0.122	12.2
7030	ENSG00000135127	CCDC64	12	+	120072510	120072736	120072510	120072729	120074442	120074586	7030	2,6,0	8,19,10	1,0,0	16,21,13	146	139	0.000441307	0.0204107	0.192,0.231,0.0	0.056,0.0,0.0	0.122	12.2
8230	ENSG00000115541	HSPE1	2	+	197500745	197500918	197500745	197500886	197501073	197501129	8230	28,33,17	5,8,2	22,16,18	1,0,2	171	139	0.00125776	0.0424605	0.82,0.77,0.874	0.947,1.0,0.88	-0.121	12.1
40096	ENSG00000035664	DAPK2	15	-	63983532	63983754	63983624	63983754	63971422	63971561	40096	53,93,56	4,14,5	62,59,46	1,2,0	231	139	7.06709e-06	0.00107136	0.889,0.8,0.871	0.974,0.947,1.0	-0.12	12
38256	ENSG00000260669	AL136419.6	14	-	24213408	24214151	24213993	24214151	24211679	24211829	38256	137146123	5,6,2	103,95,90	0,0,1	724	139	2.7696e-05	0.00293908	0.84,0.824,0.922	1.0,1.0,0.945	-0.12	12
9207	ENSG00000156411	C14orf2	14	-	103921317	103921501	103921469	103921501	103920939	103921208	9207	8,5,8	19,25,17	3,0,0	17,18,10	291	139	6.83964e-05	0.00553449	0.167,0.087,0.184	0.078,0.0,0.0	0.12	12
1572	ENSG00000204860	FAM201A	9	+	38621087	38621365	38621087	38621264	38621831	38624990	1572	13,28,21	1,0,0	21,12,10	6,0,1	240	139	0.000887946	0.0332571	0.883,1.0,1.0	0.67,1.0,0.853	0.12	12
4789	ENSG00000150316	CWC15	11	-	94973272	94973533	94973490	94973533	94972054	94972193	4789	103,74,86	0,2,0	35,29,39	1,2,4	357	139	0.00125368	0.0424219	1.0,0.935,1.0	0.932,0.85,0.792	0.12	12
25977	ENSG00000174365	SNHG11	20	+	38446886	38447076	38446886	38446948	38447465	38447623	25977	73,70,57	8,6,3	22,36,28	0,1,0	267	139	3.00474e-05	0.00307948	0.826,0.859,0.908	1.0,0.949,1.0	-0.119	11.9
3697	ENSG00000038358	EDC4	16	+	67880062	67880228	67880062	67880141	67880556	67880990	3697	27,28,32	3,8,0	24,31,19	1,1,0	226	139	0.000651562	0.0271446	0.847,0.683,1.0	0.937,0.95,1.0	-0.119	11.9
14264	ENSG00000236404	VLDLR-AS1	9	-	2539399	2539552	2539424	2539552	2536358	2536453	14264	20,23,18	7,0,1	2,13,1	0,0,0	164	139	0.000767132	0.030182	0.708,1.0,0.938	1.0,1.0,1.0	-0.118	11.8
1327	ENSG00000047230	CTPS2	X	-	16712518	16712652	16712557	16712652	16702736	16702941	1327	1,1,0	12,13,11	4,4,3	21,11,17	178	139	0.000964986	0.0351769	0.061,0.057,0.0	0.129,0.221,0.121	-0.118	11.8
4791	ENSG00000150316	CWC15	11	-	94973288	94973546	94973490	94973546	94972054	94972193	4791	99,74,78	0,2,0	33,29,39	1,2,4	341	139	0.00137006	0.0453236	1.0,0.938,1.0	0.931,0.855,0.799	0.118	11.8
36286	ENSG00000251580	RP11-539L10.3	4	-	6673601	6673830	6673683	6673830	6670724	6670999	36286	27,19,15	88,134,61	25,39,30	51,64,69	221	139	2.86491e-05	0.0030151	0.162,0.082,0.134	0.236,0.277,0.215	-0.117	11.7
7472	ENSG00000129968	ABHD17A	19	-	1878663	1880115	1879920	1880115	1877507	1877687	7472	428513374	183146138	310370305	240317292	1396	139	3.33067e-16	1.27242e-12	0.189,0.259,0.213	0.114,0.104,0.094	0.116	11.6
35020	ENSG00000125629	INSIG2	2	+	118096418	118096800	118096418	118096426	118103196	118103281	35020	165190152	0,2,0	151153144	6,7,5	513	139	1.54315e-06	0.000331196	1.0,0.963,1.0	0.872,0.856,0.886	0.116	11.6
40255	ENSG00000040199	PHLPP2	16	-	71640521	71641040	71640834	71641040	71637835	71638383	40255	39,65,48	0,1,0	45,47,79	0,8,1	452	139	0.00061122	0.0258301	1.0,0.952,1.0	1.0,0.644,0.96	0.116	11.6
32658	ENSG00000143420	ENSA	1	-	150627373	150627592	150627466	150627592	150626478	150626526	32658	214199162	38,51,29	189182195	51,78,71	232	139	0.000833861	0.0319198	0.771,0.7,0.77	0.689,0.583,0.622	0.116	11.6
37091	ENSG00000082153	BZW1	2	+	200811545	200811990	200811545	200811727	200813207	200813281	37091	583575372	154,187,93	545524500	266241193	402	139	2.34864e-05	0.00260073	0.567,0.515,0.58	0.415,0.429,0.473	0.115	11.5
33146	ENSG00000169592	INO80E	16	+	30001211	30004657	30001211	30001530	30005220	30005226	33146	134514001006	224218137	556522367	153198179	3266	139	1.11022e-16	4.71265e-13	0.204,0.215,0.238	0.134,0.101,0.08	0.114	11.4
19980	ENSG00000000419	DPM1	20	-	50945736	50945887	50945846	50945887	50942030	50942126	19980	390374292	35,45,25	333380343	8,8,6	249	139	1.24611e-12	1.83097e-09	0.862,0.823,0.867	0.959,0.964,0.97	-0.114	11.4
9085	ENSG00000155542	SETD9	5	+	56910059	56910394	56910059	56910184	56913010	56913134	9085	67,61,27	6,0,2	23,17,29	0,0,0	349	139	0.000796156	0.0308527	0.816,1.0,0.843	1.0,1.0,1.0	-0.114	11.4
39395	ENSG00000164609	SLU7	5	-	160418595	160419081	160419022	160419081	160415124	160415310	39395	45,77,57	62,84,67	27,29,10	89,81,114	566	139	1.71663e-12	2.4289e-09	0.151,0.184,0.173	0.069,0.081,0.021	0.112	11.2
17663	ENSG00000164039	BDH2	4	-	103085698	103086540	103086479	103086540	103085348	103085462	17663	60,52,48	48,31,33	10,19,14	21,29,42	920	139	5.09977e-07	0.00013164	0.159,0.202,0.18	0.067,0.09,0.048	0.112	11.2
629	ENSG00000173230	GOLGB1	3	-	121730847	121730973	121730875	121730973	121729864	121730017	629	23,17,22	134142102	28,17,20	81,53,45	167	139	0.000267023	0.0145635	0.125,0.091,0.152	0.223,0.211,0.27	-0.112	11.2
11150	ENSG00000221926	TRIM16	17	-	15682853	15682951	15682860	15682951	15680860	15680953	11150	39,29,25	1,0,2	37,43,25	3,4,9	146	139	0.000340929	0.0169525	0.974,1.0,0.922	0.922,0.911,0.726	0.112	11.2
33535	ENSG00000163625	WDFY3	4	-	84756925	84757161	84756970	84757161	84755265	84755400	33535	25,28,37	7,3,0	13,21,21	0,1,0	184	139	0.000406195	0.0193731	0.73,0.876,1.0	1.0,0.941,1.0	-0.112	11.2
26214	ENSG00000126456	IRF3	19	-	49665565	49665802	49665630	49665802	49664673	49664846	26214	39,40,21	66,58,48	23,19,22	74,76,68	204	139	0.000958658	0.0350801	0.287,0.32,0.23	0.175,0.146,0.181	0.112	11.2
28692	ENSG00000128699	ORMDL1	2	-	189784081	189784318	189784268	189784318	189782534	189782602	28692	120,106,74	124133107	45,60,34	116114109	326	139	2.60775e-06	0.00050315	0.292,0.254,0.228	0.142,0.183,0.117	0.111	11.1
38821	ENSG00000101365	IDH3B	20	-	2658637	2658859	2658758	2658859	2658394	2658522	38821	238222210	34,39,20	227228227	10,15,12	260	139	7.82044e-06	0.00115702	0.789,0.753,0.849	0.924,0.89,0.91	-0.111	11.1
38823	ENSG00000101365	IDH3B	20	-	2658626	2658859	2658758	2658859	2658394	2658522	38823	241224214	34,39,20	224227224	10,15,12	271	139	1.41859e-05	0.00178271	0.784,0.747,0.846	0.92,0.886,0.905	-0.111	11.1
24064	ENSG00000092931	MFSD11	17	+	76736852	76737100	76736852	76737091	76738281	76738442	24064	125,110,86	20,29,30	84112128	13,8,12	148	139	0.000146863	0.0096568	0.854,0.781,0.729	0.859,0.929,0.909	-0.111	11.1
35410	ENSG00000266338	NBPF15	1	-	144448774	144448916	144448856	144448916	144442816	144442920	35410	36,41,30	4,4,1	13,21,18	0,0,0	221	139	0.000310486	0.0158364	0.85,0.866,0.95	1.0,1.0,1.0	-0.111	11.1
448	ENSG00000127564	PKMYT1	16	-	2979807	2979912	2979815	2979912	2976663	2977031	448	19,10,9	1,0,0	25,21,18	3,4,2	147	139	0.000846438	0.0322719	0.947,1.0,1.0	0.887,0.832,0.895	0.111	11.1
20103	ENSG00000100038	TOP3B	22	-	21959531	21959736	21959650	21959736	21959131	21959232	20103	30,48,29	2,0,6	33,22,36	1,0,0	258	139	0.00135993	0.0451376	0.89,1.0,0.723	0.947,1.0,1.0	-0.111	11.1
40705	ENSG00000135047	CTSL	9	+	87726139	87726308	87726139	87726253	87727593	87727729	40705	211267200	222247142	256344288	194164143	194	139	0.00147497	0.0480058	0.405,0.436,0.502	0.486,0.6,0.591	-0.111	11.1
5932	ENSG00000160055	TMEM234	1	-	32221796	32222018	32221866	32222018	32221130	32221197	5932	31,47,40	112140100	9,5,11	84,69,63	209	139	1.83953e-06	0.000381932	0.155,0.183,0.21	0.067,0.046,0.104	0.11	11
35972	ENSG00000111727	HCFC2	12	+	104082712	104082905	104082712	104082901	104086846	104087014	35972	10,9,7	44,38,46	3,3,0	35,29,39	143	139	0.000716338	0.0287766	0.181,0.187,0.129	0.077,0.091,0.0	0.11	11
40726	ENSG00000089009	RPL6	12	-	112408568	112408656	112408578	112408656	112408239	112408338	40726	69,68,51	11,6,16	62,60,59	8,1,1	149	139	0.000801171	0.0310103	0.854,0.914,0.748	0.878,0.982,0.982	-0.109	10.9
33042	ENSG00000185909	KLHDC8B	3	+	49172635	49173145	49172635	49172801	49174238	49174403	33042	292296225	13,10,16	255270218	3,1,4	483	139	3.63943e-06	0.000652757	0.866,0.895,0.802	0.961,0.987,0.94	-0.108	10.8
12084	ENSG00000104852	SNRNP70	19	+	49102113	49103587	49102113	49102185	49104633	49104735	12084	609808647	0,1,2	286277185	2,3,4	1541	139	0.000389739	0.0188471	1.0,0.986,0.967	0.928,0.893,0.807	0.108	10.8
11052	ENSG00000160447	PKN3	9	+	128702522	128702939	128702522	128702600	128705302	128705543	11052	80,69,55	0,0,0	69,73,48	4,4,0	478	139	0.000405977	0.0193731	1.0,1.0,1.0	0.834,0.841,1.0	0.108	10.8
1579	ENSG00000139644	TMBIM6	12	+	49741956	49742280	49741956	49742115	49752463	49752549	1579	24,16,16	87,93,68	45,25,21	44,71,55	304	139	0.00069792	0.0283645	0.112,0.073,0.097	0.319,0.139,0.149	-0.108	10.8
33790	ENSG00000101752	MIB1	18	+	21798083	21798228	21798083	21798188	21799840	21799974	33790	6,35,27	0,1,1	19,19,32	2,2,5	179	139	0.00133833	0.0444981	1.0,0.965,0.954	0.881,0.881,0.832	0.108	10.8
798	ENSG00000160271	RALGDS	9	-	133100495	133101762	133101519	133101762	133100267	133100382	798	278309211	129,158,98	112,141,93	138136129	1163	139	1.23601e-12	1.83097e-09	0.205,0.189,0.205	0.088,0.11,0.079	0.107	10.7
37977	ENSG00000150787	PTS	11	+	112229416	112229627	112229416	112229486	112230207	112230230	37977	17,21,9	44,54,36	1,2,2	25,20,20	280	139	1.8394e-05	0.00216081	0.161,0.162,0.11	0.019,0.047,0.047	0.107	10.7
15183	ENSG00000120705	ETF1	5	-	138542633	138542936	138542737	138542936	138518691	138518867	15183	45,48,34	1,0,0	35,32,37	7,2,0	243	139	0.000299833	0.0155	0.963,1.0,1.0	0.741,0.901,1.0	0.107	10.7
26038	ENSG00000197375	SLC22A5	5	+	132384146	132384314	132384146	132384301	132385327	132385499	26038	7,5,13	51,63,33	2,5,5	63,94,85	152	139	0.0008281	0.0317949	0.112,0.068,0.265	0.028,0.046,0.051	0.107	10.7
22843	ENSG00000092199	HNRNPC	14	-	21263666	21263829	21263672	21263829	21263310	21263336	22843	23,28,19	5,1,2	19,18,27	0,0,0	145	139	0.00104965	0.0374065	0.815,0.964,0.901	1.0,1.0,1.0	-0.107	10.7
15567	ENSG00000183513	COA5	2	-	98608258	98608492	98608397	98608492	98604138	98604191	15567	365296252	9,12,9	175221156	17,18,20	278	139	3.14399e-06	0.00058797	0.953,0.925,0.933	0.837,0.86,0.796	0.106	10.6
29010	ENSG00000113583	C5orf15	5	-	133968448	133968674	133968525	133968674	133959534	133960020	29010	147,117,86	16,12,15	185143148	5,5,9	216	139	4.39459e-05	0.00406505	0.855,0.863,0.787	0.96,0.948,0.914	-0.106	10.6
1262	ENSG00000184436	THAP7	22	-	21001545	21001742	21001563	21001742	21000646	21001411	1262	29,45,34	8,2,1	39,37,41	0,0,0	157	139	5.62274e-05	0.0047972	0.762,0.952,0.968	1.0,1.0,1.0	-0.106	10.6
12874	ENSG00000177181	RIMKLA	1	+	42409983	42410187	42409983	42410071	42414483	42422578	12874	96,106,84	16,3,8	99,80,52	2,2,1	255	139	0.000158214	0.0101698	0.766,0.951,0.851	0.964,0.956,0.966	-0.106	10.6
18485	ENSG00000013288	MAN2B2	4	+	6617379	6617607	6617379	6617492	6619926	6620044	18485	13,14,6	51,32,15	4,7,1	25,41,45	254	139	0.000581276	0.024914	0.122,0.193,0.18	0.081,0.085,0.012	0.106	10.6
2760	ENSG00000147535	PLPP5	8	-	38268766	38268990	38268881	38268990	38268370	38268461	2760	102,124,96	233227170	69,44,43	223237199	254	139	1.37266e-08	6.02755e-06	0.193,0.23,0.236	0.145,0.092,0.106	0.105	10.5
22944	ENSG00000050426	LETMD1	12	+	51052091	51052246	51052091	51052207	51053777	51053860	22944	21,20,5	54,78,46	1,8,6	70,60,76	178	139	5.07521e-05	0.00451954	0.233,0.167,0.078	0.011,0.094,0.058	0.105	10.5
11751	ENSG00000108773	KAT2A	17	-	42119053	42119436	42119244	42119436	42118284	42118403	11751	158,156,91	196207166	97,120,81	332271297	330	139	9.56974e-10	6.64714e-07	0.253,0.241,0.188	0.11,0.157,0.103	0.104	10.4
9925	ENSG00000092094	OSGEP	14	-	20452275	20452448	20452328	20452448	20452072	20452149	9925	14,18,13	64,72,41	5,5,5	72,59,58	192	139	6.2134e-05	0.00512679	0.137,0.153,0.187	0.048,0.058,0.059	0.104	10.4
37800	ENSG00000149743	TRPT1	11	-	64226049	64226229	64226061	64226229	64225785	64225869	37800	159143104	34,35,20	120,137,86	19,7,5	151	139	7.01598e-05	0.00561911	0.811,0.79,0.827	0.853,0.947,0.941	-0.104	10.4
33574	ENSG00000125458	NT5C	17	-	75131042	75131281	75131180	75131281	75130752	75130867	33574	65,68,56	14,1,5	20,35,31	2,0,0	277	139	0.000264287	0.014465	0.7,0.972,0.849	0.834,1.0,1.0	-0.104	10.4
13063	ENSG00000186787	SPIN2B	X	-	57121279	57121491	57121316	57121491	57119682	57120631	13063	51,35,17	0,1,0	27,35,26	2,3,4	176	139	0.0003871	0.0187764	1.0,0.965,1.0	0.914,0.902,0.837	0.104	10.4
24081	ENSG00000134375	TIMM17A	1	+	201958838	201958913	201958838	201958908	201963615	201963744	24081	2,2,4	9,15,14	0,0,1	7,7,4	144	139	0.00117007	0.0405626	0.177,0.114,0.216	0.0,0.0,0.194	0.104	10.4
28133	ENSG00000166946	CCNDBP1	15	+	43185819	43186233	43185819	43185879	43189198	43189280	28133	364355222	22,16,21	178189168	3,3,8	493	139	0.00119541	0.0411426	0.823,0.862,0.749	0.944,0.947,0.856	-0.104	10.4
26228	ENSG00000126456	IRF3	19	-	49661449	49662328	49661947	49662328	49660712	49660828	26228	127,162,88	138,135,96	58,70,44	125170155	637	139	2.6491e-12	3.37346e-09	0.167,0.208,0.167	0.092,0.082,0.058	0.103	10.3
26752	ENSG00000137822	TUBGCP4	15	+	43403682	43403842	43403682	43403799	43404412	43404552	26752	17,8,6	40,51,37	4,1,6	57,62,47	182	139	0.000214014	0.0126367	0.245,0.107,0.11	0.051,0.012,0.089	0.103	10.3
13070	ENSG00000186787	SPIN2B	X	-	57121275	57121491	57121316	57121491	57119682	57120631	13070	56,31,23	0,1,0	31,33,26	2,3,4	180	139	0.000369924	0.0181648	1.0,0.96,1.0	0.923,0.895,0.834	0.103	10.3
39924	ENSG00000092841	MYL6	12	+	56159470	56159705	56159470	56159622	56159974	56159988	39924	21,16,22	71,86,71	6,10,11	98155170	222	139	1.45826e-08	6.33068e-06	0.156,0.104,0.162	0.037,0.039,0.039	0.102	10.2
10471	ENSG00000095066	HOOK2	19	-	12774634	12774741	12774668	12774741	12772873	12773044	10471	61,88,64	135149109	36,48,41	114137150	173	139	0.000333329	0.0167335	0.266,0.322,0.321	0.202,0.22,0.18	0.102	10.2
29401	ENSG00000071537	SEL1L	14	-	81526729	81526852	81526745	81526852	81506073	81506241	29401	30,33,27	0,10,4	18,16,23	0,0,2	155	139	0.000545569	0.0237655	1.0,0.747,0.858	1.0,1.0,0.912	-0.102	10.2
38163	ENSG00000121060	TRIM25	17	-	56895744	56895952	56895925	56895952	56895520	56895604	38163	40,34,16	99,81,78	12,5,11	159128135	320	139	2.27929e-13	4.44073e-10	0.149,0.154,0.082	0.032,0.017,0.034	0.101	10.1
37709	ENSG00000164068	RNF123	3	+	49712478	49712892	49712478	49712656	49713512	49713587	37709	20,32,15	56,64,36	8,3,7	54,73,65	375	139	1.19922e-08	5.58079e-06	0.117,0.156,0.134	0.052,0.015,0.038	0.101	10.1
32550	ENSG00000123179	EBPL	13	-	49691249	49691463	49691253	49691463	49669776	49669842	32550	26,32,17	1,0,0	34,29,31	7,0,6	143	139	6.20942e-05	0.00512679	0.962,1.0,1.0	0.825,1.0,0.834	0.101	10.1
623	ENSG00000028528	SNX1	15	+	64094122	64094335	64094122	64094280	64112572	64112684	623	23,31,28	1,2,7	25,13,19	0,1,0	194	139	0.000284044	0.0150295	0.943,0.917,0.741	1.0,0.903,1.0	-0.101	10.1
18964	ENSG00000187735	TCEA1	8	-	54021410	54021586	54021525	54021586	54010429	54010492	18964	10,12,7	23,45,29	3,1,3	29,19,31	254	139	0.000683387	0.0279523	0.192,0.127,0.117	0.054,0.028,0.05	0.101	10.1
36066	ENSG00000059573	ALDH18A1	10	-	95656445	95656609	95656474	95656609	95653289	95653405	36066	43,48,19	6,0,3	49,19,13	0,0,0	168	139	0.000796284	0.0308527	0.856,1.0,0.84	1.0,1.0,1.0	-0.101	10.1
20699	ENSG00000101361	NOP56	20	+	2655933	2656214	2655933	2656034	2656400	2656549	20699	368366248	359352284	599658485	354392392	319	139	2.21273e-05	0.00247172	0.309,0.312,0.276	0.424,0.422,0.35	-0.1	10
6507	ENSG00000089327	FXYD5	19	+	35166141	35166325	35166141	35166171	35169565	35169880	6507	49,45,27	5,3,0	48,73,56	0,0,0	293	139	0.000497561	0.0223102	0.823,0.877,1.0	1.0,1.0,1.0	-0.1	10
29066	ENSG00000165661	QSOX2	9	-	136218930	136219164	136219029	136219164	136218678	136218808	29066	26,20,18	110,102,53	3,10,8	114123137	238	139	6.09005e-09	3.29122e-06	0.121,0.103,0.166	0.015,0.045,0.033	0.099	9.9
15558	ENSG00000183513	COA5	2	-	98608262	98608507	98608397	98608507	98604138	98604191	15558	378309267	9,12,9	187247160	17,18,20	274	139	5.32637e-06	0.000869586	0.955,0.929,0.938	0.848,0.874,0.802	0.099	9.9
7729	ENSG00000159267	HLCS	21	-	36947332	36948287	36948165	36948287	36938831	36938994	7729	18,16,2	4,2,0	10,2,2	0,1,0	972	139	0.000301543	0.0155669	0.392,0.534,1.0	1.0,0.222,1.0	-0.099	9.9
8643	ENSG00000132600	PRMT7	16	+	68352247	68352409	68352247	68352315	68353491	68353566	8643	54,54,55	2,5,6	53,59,68	0,1,1	233	139	8.05117e-05	0.00622629	0.942,0.866,0.845	1.0,0.972,0.976	-0.098	9.8
22225	ENSG00000251201	TMED7-TICAM2	5	-	115616275	115616445	115616317	115616445	115578650	115581315	22225	171171111	22,14,12	132145142	2,4,2	181	139	4.55853e-08	1.7415e-05	0.857,0.904,0.877	0.981,0.965,0.982	-0.097	9.7
36201	ENSG00000137200	CMTR1	6	+	37475320	37475916	37475320	37475412	37476125	37476194	36201	144,132,94	89,90,73	71,62,42	62,84,90	643	139	2.06938e-05	0.00234749	0.259,0.241,0.218	0.198,0.138,0.092	0.097	9.7
2766	ENSG00000147535	PLPP5	8	-	38268794	38268960	38268881	38268960	38268370	38268461	2766	92,95,76	233227170	62,35,35	223237199	226	139	2.06257e-07	6.20445e-05	0.195,0.205,0.216	0.146,0.083,0.098	0.096	9.6
13381	ENSG00000145882	PCYOX1L	5	+	149358036	149358228	149358036	149358156	149362636	149362843	13381	14,13,10	78,45,47	2,3,5	107,67,52	211	139	1.04813e-06	0.000237292	0.106,0.16,0.123	0.012,0.029,0.06	0.096	9.6
40702	ENSG00000137404	NRM	6	-	30690024	30690243	30690046	30690243	30689275	30689452	40702	8,2,1	35,12,13	0,0,3	27,27,37	161	139	0.000677066	0.027783	0.165,0.126,0.062	0.0,0.0,0.065	0.096	9.6
8484	ENSG00000143416	SELENBP1	1	-	151367198	151367341	151367218	151367341	151366721	151366904	8484	16,8,4	53,64,62	3,2,0	52,64,58	159	139	1.46701e-05	0.00183751	0.209,0.099,0.053	0.048,0.027,0.0	0.095	9.5
38055	ENSG00000114503	NCBP2	3	-	196939296	196939432	196939392	196939432	196937509	196937631	38055	352362271	30,15,34	325366343	52,59,59	235	139	2.46314e-05	0.00268855	0.874,0.935,0.825	0.787,0.786,0.775	0.095	9.5
22357	ENSG00000079134	THOC1	18	-	225235	225403	225336	225403	225088	225139	22357	35,34,21	74,112,66	16,16,11	103,100,88	240	139	2.65176e-05	0.00284391	0.215,0.15,0.156	0.083,0.085,0.068	0.095	9.5
9639	ENSG00000130724	CHMP2A	19	-	58554778	58554973	58554841	58554973	58554045	58554236	9639	63,60,42	0,0,1	38,31,41	2,3,4	202	139	0.000346351	0.0171512	1.0,1.0,0.967	0.929,0.877,0.876	0.095	9.5
32117	ENSG00000253210	RP11-809O17.1	8	-	141127969	141128121	141128066	141128121	141126043	141126471	32117	6,9,7	39,27,29	1,3,0	19,29,14	236	139	0.000875746	0.0329942	0.083,0.164,0.124	0.03,0.057,0.0	0.095	9.5
38164	ENSG00000100271	TTLL1	22	-	43069631	43069844	43069635	43069844	43068409	43068590	38164	2,7,1	26,22,18	2,0,0	25,14,18	143	139	0.00125786	0.0424605	0.07,0.236,0.051	0.072,0.0,0.0	0.095	9.5
17186	ENSG00000167799	NUDT8	11	-	67629347	67629429	67629392	67629429	67628918	67629051	17186	39,32,12	0,1,0	26,39,45	7,1,1	184	139	0.00142567	0.0468313	1.0,0.96,1.0	0.737,0.967,0.971	0.095	9.5
12406	ENSG00000070010	UFD1L	22	-	19475469	19475567	19475495	19475567	19474903	19475100	12406	357430280	62,55,54	400394322	30,26,15	165	139	8.15174e-09	4.20839e-06	0.829,0.868,0.814	0.918,0.927,0.948	-0.094	9.4
9000	ENSG00000129933	MAU2	19	+	19347279	19347370	19347279	19347363	19348888	19348938	9000	2,3,4	30,25,28	0,0,0	27,34,31	146	139	0.000464962	0.021273	0.06,0.103,0.12	0.0,0.0,0.0	0.094	9.4
26901	ENSG00000160993	ALKBH4	7	-	102459603	102459710	102459607	102459710	102456833	102457981	26901	102,99,54	3,6,1	113108141	22,10,21	143	139	8.39499e-06	0.00120296	0.971,0.941,0.981	0.833,0.913,0.867	0.093	9.3
17278	ENSG00000163389	POGLUT1	3	+	119486832	119487036	119486832	119486932	119488928	119488987	17278	9,6,15	77,65,31	1,4,1	63,76,44	243	139	8.95871e-06	0.00126759	0.063,0.05,0.217	0.009,0.029,0.013	0.093	9.3
36100	ENSG00000137497	NUMA1	11	-	72080314	72080494	72080457	72080494	72069841	72069911	36100	10,4,7	69,70,50	17,19,15	44,54,49	282	139	2.91908e-05	0.00304693	0.067,0.027,0.065	0.16,0.148,0.131	-0.093	9.3
8001	ENSG00000160753	RUSC1	1	+	155325426	155325672	155325426	155325490	155325863	155327132	8001	151,123,93	11,5,7	183197222	2,3,4	321	139	8.69377e-05	0.00657679	0.856,0.914,0.852	0.975,0.966,0.96	-0.093	9.3
10434	ENSG00000135164	DMTF1	7	+	87179544	87179734	87179544	87179675	87181308	87181341	10434	42,38,29	7,1,3	17,21,28	1,0,0	198	139	0.000239245	0.0135808	0.808,0.964,0.872	0.923,1.0,1.0	-0.093	9.3
39406	ENSG00000172663	TMEM134	11	-	67468016	67468092	67468027	67468092	67467500	67467563	39406	46,74,42	128157119	42,36,45	174199174	150	139	0.000298113	0.0154333	0.25,0.304,0.246	0.183,0.144,0.193	0.093	9.3
20504	ENSG00000144589	STK11IP	2	+	219601234	219601554	219601234	219601440	219601640	219601715	20504	11,7,11	47,45,22	1,2,4	31,36,24	253	139	0.000920699	0.0341159	0.114,0.079,0.216	0.017,0.03,0.084	0.093	9.3
32662	ENSG00000143420	ENSA	1	-	150627311	150627592	150627466	150627592	150626478	150626526	32662	337343275	38,51,29	324312355	51,78,71	294	139	0.00126122	0.0424605	0.807,0.761,0.818	0.75,0.654,0.703	0.093	9.3
25868	ENSG00000215908	CROCCP2	1	-	16644510	16644672	16644645	16644672	16643027	16643145	25868	3,2,5	8,17,7	0,0,2	18,11,4	274	139	0.00148629	0.0481056	0.16,0.056,0.266	0.0,0.0,0.202	0.093	9.3
28036	ENSG00000104907	TRMT1	19	-	13112895	13113011	13112908	13113011	13112704	13112817	28036	152142107	27,17,28	90113110	8,7,8	152	139	0.000238604	0.0135646	0.837,0.884,0.778	0.911,0.937,0.926	-0.092	9.2
29435	ENSG00000134186	PRPF38B	1	+	108695701	108695780	108695701	108695770	108696042	108696194	29435	39,29,26	122162134	17,3,16	114104133	149	139	0.000262898	0.014447	0.23,0.143,0.153	0.122,0.026,0.101	0.092	9.2
5427	ENSG00000127586	CHTF18	16	+	790524	792367	790524	792347	792438	792590	5427	11,14,7	74,46,46	1,6,10	88,80,83	159	139	0.000883693	0.0331628	0.115,0.21,0.117	0.01,0.062,0.095	0.092	9.2
6292	ENSG00000135473	PAN2	12	-	56323005	56323209	56323061	56323209	56322614	56322758	6292	70,44,28	121,121,72	20,14,22	79,98,65	195	139	0.000982089	0.0356303	0.292,0.206,0.217	0.153,0.092,0.194	0.092	9.2
33437	ENSG00000122565	CBX3	7	+	26201764	26202013	26201764	26201826	26202970	26203022	33437	124,119,75	310356223	47,44,41	474449412	326	139	0	0	0.146,0.125,0.125	0.041,0.04,0.041	0.091	9.1
26004	ENSG00000111652	COPS7A	12	+	6724305	6724388	6724305	6724378	6724613	6724755	26004	2,12,4	28,51,39	1,0,1	34,25,31	149	139	3.00689e-05	0.00307948	0.062,0.18,0.087	0.027,0.0,0.029	0.091	9.1
39047	ENSG00000168758	SEMA4C	2	-	96866275	96866431	96866282	96866431	96865866	96865929	39047	2,2,0	59,55,46	7,7,0	32,34,18	146	139	0.000131941	0.00895304	0.031,0.033,0.0	0.172,0.164,0.0	-0.091	9.1
5222	ENSG00000111196	MAGOHB	12	-	10613414	10613605	10613483	10613605	10610621	10610680	5222	32,28,19	0,0,0	30,54,15	0,8,1	208	139	0.000241135	0.0136475	1.0,1.0,1.0	1.0,0.819,0.909	0.091	9.1
39204	ENSG00000115084	SLC35F5	2	-	113755854	113756620	113756467	113756620	113755453	113755544	39204	394486273	6,2,1	297246258	15,6,3	752	139	0.000279396	0.01495	0.924,0.978,0.981	0.785,0.883,0.941	0.091	9.1
30517	ENSG00000067829	IDH3G	X	-	153790795	153791037	153790809	153791037	153790194	153790292	30517	33,42,25	4,3,2	47,53,48	0,0,0	153	139	0.000453333	0.0208157	0.882,0.927,0.919	1.0,1.0,1.0	-0.091	9.1
40461	ENSG00000144840	RABL3	3	-	120738526	120738667	120738549	120738667	120730695	120730787	40461	39,28,35	5,4,0	10,7,17	0,0,0	162	139	0.000828042	0.0317949	0.87,0.857,1.0	1.0,1.0,1.0	-0.091	9.1
10935	ENSG00000121940	CLCC1	1	-	108963342	108963450	108963360	108963450	108962308	108962469	10935	1,1,2	54,37,48	6,5,7	47,40,37	157	139	0.000153861	0.00997821	0.016,0.023,0.036	0.102,0.1,0.143	-0.09	9
23010	ENSG00000266074	BAHCC1	17	+	81458620	81458725	81458620	81458701	81458812	81458969	23010	67,51,28	7,0,7	47,50,50	0,3,0	163	139	0.000595501	0.0252777	0.891,1.0,0.773	1.0,0.934,1.0	-0.09	9
20201	ENSG00000130066	SAT1	X	+	23783799	23783927	23783799	23783883	23785327	23785429	20201	33,45,28	205260144	11,5,1	139143138	183	139	7.04297e-10	5.27574e-07	0.109,0.116,0.129	0.057,0.026,0.005	0.089	8.9
24999	ENSG00000075089	ACTR6	12	+	100205675	100205757	100205675	100205744	100207662	100207786	24999	29,50,21	84130101	26,26,17	141143132	152	139	0.0011661	0.0404988	0.24,0.26,0.16	0.144,0.143,0.105	0.089	8.9
3464	ENSG00000157693	C9orf91	9	+	114643266	114643399	114643266	114643326	114644066	114644704	3464	86,114,72	4,1,1	78,50,71	2,9,6	212	139	0.00138931	0.0458339	0.934,0.987,0.979	0.962,0.785,0.886	0.089	8.9
10388	ENSG00000161010	C5orf45	5	-	179853196	179853437	179853377	179853437	179847977	179848066	10388	35,21,26	79,59,63	7,15,6	77,69,41	320	139	2.07748e-05	0.0023481	0.161,0.134,0.152	0.038,0.086,0.06	0.088	8.8
3846	ENSG00000105865	DUS4L	7	+	107573703	107573883	107573703	107573821	107575187	107575310	3846	27,27,22	86,112,78	5,11,12	91,95,67	201	139	8.37899e-05	0.00640205	0.178,0.143,0.163	0.037,0.074,0.11	0.088	8.8
36040	ENSG00000136699	SMPD4	2	-	130173509	130173656	130173513	130173656	130173278	130173354	36040	23,12,13	106,104,62	9,6,10	121141124	143	139	0.000117652	0.00821695	0.174,0.101,0.169	0.067,0.04,0.073	0.088	8.8
33586	ENSG00000125458	NT5C	17	-	75130964	75131281	75131180	75131281	75130752	75130867	33586	120,149,97	14,1,5	47,75,64	2,0,0	355	139	0.000132921	0.0089876	0.77,0.983,0.884	0.902,1.0,1.0	-0.088	8.8
33578	ENSG00000125458	NT5C	17	-	75131052	75131281	75131180	75131281	75130752	75130867	33578	73,77,56	14,1,5	18,40,35	2,0,0	267	139	0.000275191	0.0148447	0.731,0.976,0.854	0.824,1.0,1.0	-0.088	8.8
37275	ENSG00000139631	CSAD	12	-	53171877	53172052	53171918	53172052	53171325	53171441	37275	29,30,23	2,5,2	15,20,12	0,0,1	180	139	0.000931752	0.0343618	0.918,0.822,0.899	1.0,1.0,0.903	-0.088	8.8
24188	ENSG00000130827	PLXNA3	X	+	154467231	154467471	154467231	154467313	154467544	154467688	24188	115,79,51	0,1,1	51,58,46	2,1,6	297	139	0.000946286	0.0347605	1.0,0.974,0.96	0.923,0.964,0.782	0.088	8.8
35631	ENSG00000221968	FADS3	11	-	61877410	61877587	61877510	61877587	61876865	61876963	35631	52,57,49	146179100	17,15,22	94,94,103	239	139	0.000111427	0.00789767	0.172,0.156,0.222	0.095,0.085,0.11	0.087	8.7
33585	ENSG00000125458	NT5C	17	-	75131056	75131281	75131180	75131281	75130752	75130867	33585	65,59,52	14,1,5	14,33,28	2,0,0	263	139	0.00039374	0.0189361	0.71,0.969,0.846	0.787,1.0,1.0	-0.087	8.7
20664	ENSG00000166295	ANAPC16	10	+	72215999	72216232	72215999	72216138	72230365	72230440	20664	28,28,25	166164114	5,5,1	140188124	233	139	7.54952e-14	1.80259e-10	0.091,0.092,0.116	0.021,0.016,0.005	0.086	8.6
4317	ENSG00000173193	PARP14	3	+	122720254	122721653	122720254	122720388	122727811	122727986	4317	76,46,44	35,32,29	13,24,10	35,20,29	1404	139	6.37569e-07	0.000158163	0.177,0.125,0.131	0.035,0.106,0.033	0.086	8.6
28459	ENSG00000172009	THOP1	19	+	2807571	2807812	2807571	2807780	2808242	2808444	28459	65,70,53	4,2,12	73,105,93	1,3,1	171	139	0.000162053	0.0103354	0.93,0.966,0.782	0.983,0.966,0.987	-0.086	8.6
26223	ENSG00000126456	IRF3	19	-	49664552	49664793	49664673	49664793	49663342	49663514	26223	77,111,59	132,172,93	74,58,46	153168164	260	139	0.000236025	0.0135185	0.238,0.257,0.253	0.205,0.156,0.13	0.086	8.6
27629	ENSG00000078061	ARAF	X	+	47564984	47565155	47564984	47565098	47565251	47565350	27629	74,66,40	1,2,7	66,70,68	0,0,0	196	139	0.000719638	0.0288179	0.981,0.959,0.802	1.0,1.0,1.0	-0.086	8.6
18283	ENSG00000196586	MYO6	6	+	75895230	75895362	75895230	75895260	75898372	75898411	18283	19,13,15	47,69,52	8,7,2	52,57,47	241	139	0.000787223	0.0307823	0.189,0.098,0.143	0.082,0.066,0.024	0.086	8.6
15401	ENSG00000148660	CAMK2G	10	-	73825278	73825347	73825320	73825347	73824039	73824084	15401	129,108,88	6,10,4	119122114	13,22,17	181	139	0.000813362	0.0313551	0.943,0.892,0.944	0.875,0.81,0.837	0.086	8.6
13320	ENSG00000143624	INTS3	1	+	153760826	153760930	153760826	153760918	153761569	153761676	13320	8,8,12	62,98,64	5,2,0	94,90,77	151	139	1.68897e-05	0.00203545	0.106,0.07,0.147	0.047,0.02,0.0	0.085	8.5
7874	ENSG00000132275	RRP8	11	-	6600925	6601602	6601148	6601602	6600668	6600775	7874	89,92,63	2,2,5	101,93,106	1,0,0	362	139	0.00104234	0.0371807	0.945,0.946,0.829	0.975,1.0,1.0	-0.085	8.5
33509	ENSG00000071462	WBSCR22	7	+	73683572	73683800	73683572	73683673	73686635	73686731	33509	2,5,2	10,16,23	0,0,1	24,24,23	266	139	0.00112511	0.0394697	0.095,0.14,0.043	0.0,0.0,0.022	0.085	8.5
22928	ENSG00000106009	BRAT1	7	-	2540829	2541044	2540978	2541044	2539785	2539888	22928	49,35,41	170183103	21,13,36	235293302	288	139	1.39995e-11	1.67132e-08	0.122,0.085,0.161	0.041,0.021,0.054	0.084	8.4
4307	ENSG00000182004	SNRPE	1	+	203861602	203861802	203861602	203861743	203862181	203862264	4307	15,27,28	153130100	11,10,3	147182123	198	139	2.88569e-07	8.04687e-05	0.064,0.127,0.164	0.05,0.037,0.017	0.084	8.4
39923	ENSG00000092841	MYL6	12	+	56159470	56159696	56159470	56159622	56159974	56159988	39923	16,12,18	71,86,71	5,8,10	98155170	213	139	1.03855e-06	0.000237292	0.128,0.083,0.142	0.032,0.033,0.037	0.084	8.4
37453	ENSG00000033030	ZCCHC8	12	-	122483428	122483563	122483459	122483563	122483278	122483344	37453	17,20,7	129,94,102	2,2,0	68,59,56	170	139	4.93994e-07	0.000129095	0.097,0.148,0.053	0.023,0.027,0.0	0.083	8.3
11776	ENSG00000022976	ZNF839	14	+	102339093	102339312	102339093	102339223	102341322	102342367	11776	15,14,13	72,81,77	1,4,0	40,66,46	228	139	1.08307e-06	0.000241969	0.113,0.095,0.093	0.015,0.036,0.0	0.083	8.3
17281	ENSG00000163389	POGLUT1	3	+	119486832	119487031	119486832	119486932	119488928	119488987	17281	8,7,11	77,65,31	1,4,0	63,76,44	238	139	1.03767e-05	0.00142086	0.057,0.059,0.172	0.009,0.03,0.0	0.083	8.3
1368	ENSG00000172482	AGXT	2	+	240875934	240876089	240875934	240876004	240877536	240877632	1368	36,33,20	108,80,89	15,25,11	132107114	224	139	9.52821e-05	0.00702715	0.171,0.204,0.122	0.066,0.127,0.056	0.083	8.3
34989	ENSG00000140939	NOL3	16	+	67174161	67174454	67174161	67174300	67174620	67174944	34989	200235211	17,23,19	267271232	18,8,6	293	139	0.000583387	0.0249297	0.848,0.829,0.84	0.876,0.941,0.948	-0.083	8.3
35671	ENSG00000163510	CWC22	2	-	180006932	180007113	180007069	180007113	179993314	179993454	35671	2,1,0	23,23,29	6,3,4	28,24,11	276	139	0.000633749	0.0266404	0.042,0.021,0.0	0.097,0.059,0.155	-0.083	8.3
7909	ENSG00000088451	TGDS	13	-	94596050	94596257	94596161	94596257	94593840	94593907	7909	71,53,42	1,0,0	75,54,39	1,6,2	250	139	0.0014157	0.0465839	0.975,1.0,1.0	0.977,0.833,0.916	0.083	8.3
39342	ENSG00000177646	ACAD9	3	+	128879628	128880017	128879628	128879841	128884652	128884746	39342	72,102,78	240210167	43,52,46	248243312	315	139	2.49563e-09	1.61594e-06	0.117,0.177,0.171	0.071,0.086,0.061	0.082	8.2
21737	ENSG00000198089	SFI1	22	+	31614788	31614869	31614788	31614860	31615047	31615279	21737	0,0,1	55,51,35	2,2,7	27,41,34	148	139	0.000170166	0.0106397	0.0,0.0,0.026	0.065,0.044,0.162	-0.082	8.2
10322	ENSG00000006634	DBF4	7	+	87878052	87878225	87878052	87878133	87884978	87885158	10322	167157146	13,18,18	144207198	3,12,10	231	139	0.000893869	0.0333355	0.885,0.84,0.83	0.967,0.912,0.923	-0.082	8.2
33786	ENSG00000175061	LRRC75A-AS1	17	+	16439326	16439703	16439326	16439414	16440184	16440253	33786	630969585249	451951983832	421347154111	536852973925	428	139	5.48038e-07	0.000139578	0.312,0.303,0.308	0.203,0.224,0.254	0.081	8.1
38056	ENSG00000114503	NCBP2	3	-	196939196	196939432	196939392	196939432	196937509	196937631	38056	668693495	30,15,34	597716598	52,59,59	335	139	5.48877e-06	0.000884757	0.902,0.95,0.858	0.826,0.834,0.808	0.081	8.1
8242	ENSG00000119929	CUTC	10	+	99732219	99732409	99732219	99732356	99736245	99736317	8242	63,87,59	5,6,5	75,92,69	1,2,0	192	139	7.93155e-05	0.00615872	0.901,0.913,0.895	0.982,0.971,1.0	-0.081	8.1
34336	ENSG00000187244	BCAM	19	+	44814151	44814288	44814151	44814207	44814603	44814760	34336	82,106,71	0,1,2	43,69,48	3,9,1	220	139	8.78056e-05	0.00661912	1.0,0.985,0.957	0.901,0.829,0.968	0.081	8.1
8497	ENSG00000129219	PLD2	17	+	4818296	4818385	4818296	4818344	4818493	4818607	8497	110,109,45	5,0,9	133136118	0,1,1	180	139	0.000121967	0.00841068	0.944,1.0,0.794	1.0,0.991,0.989	-0.081	8.1
41037	ENSG00000159363	ATP13A2	1	-	16995975	16996164	16995990	16996164	16993628	16993835	41037	130,141,78	11,17,16	155114136	6,8,4	154	139	0.000169073	0.0106061	0.914,0.882,0.815	0.959,0.928,0.968	-0.081	8.1
687	ENSG00000000457	SCYL3	1	-	169888663	169888890	169888675	169888890	169878633	169878819	687	3,7,2	43,31,19	0,1,0	23,11,6	151	139	0.000499369	0.0223164	0.06,0.172,0.088	0.0,0.077,0.0	0.081	8.1
6167	ENSG00000159314	ARHGAP27	17	-	45405675	45406083	45405846	45406083	45404923	45405106	6167	122,108,60	5,6,4	75133121	1,1,2	310	139	0.000802891	0.0310372	0.916,0.89,0.871	0.971,0.984,0.964	-0.081	8.1
5436	ENSG00000131788	PIAS3	1	-	145851019	145851153	145851050	145851153	145850770	145850939	5436	126,112,72	13,14,10	73,131,88	0,4,9	170	139	0.00118798	0.0409238	0.888,0.867,0.855	1.0,0.964,0.889	-0.081	8.1
31456	ENSG00000155066	PROM2	2	+	95277371	95277566	95277371	95277496	95277929	95278004	31456	183186111	20,19,20	255245260	28,10,8	209	139	0.00144985	0.0475032	0.859,0.867,0.787	0.858,0.942,0.956	-0.081	8.1
29834	ENSG00000130758	MAP3K10	19	+	40198374	40198590	40198374	40198555	40204484	40204657	29834	6,10,4	58,42,40	2,1,1	42,61,38	174	139	8.90338e-05	0.00668244	0.076,0.16,0.074	0.037,0.013,0.021	0.08	8
1254	ENSG00000184436	THAP7	22	-	21001522	21001742	21001563	21001742	21000646	21001411	1254	50,68,40	8,2,1	56,53,37	0,0,0	180	139	0.000172464	0.0107482	0.828,0.963,0.969	1.0,1.0,1.0	-0.08	8
23628	ENSG00000197530	MIB2	1	+	1627295	1627495	1627295	1627444	1627672	1627865	23628	11,24,8	83,81,59	5,4,1	59,65,44	190	139	0.000179751	0.0111117	0.088,0.178,0.09	0.058,0.043,0.016	0.08	8
20407	ENSG00000226232	RP11-419C5.2	16	-	69977931	69978112	69978076	69978112	69976387	69976732	20407	15,3,0	23,25,24	0,1,0	9,8,12	284	139	0.000259636	0.0143752	0.242,0.055,0.0	0.0,0.058,0.0	0.08	8
7705	ENSG00000196155	PLEKHG4	16	+	67280881	67281005	67280881	67280984	67281090	67281184	7705	77,80,71	0,0,0	55,57,37	2,0,8	160	139	0.000881003	0.0331269	1.0,1.0,1.0	0.96,1.0,0.801	0.08	8
17444	ENSG00000156113	KCNMA1	10	-	77027780	77027891	77027822	77027891	77019012	77019099	17444	7,3,1	25,33,18	0,2,2	50,91,52	181	139	0.000426533	0.0199811	0.177,0.065,0.041	0.0,0.017,0.029	0.079	7.9
24462	ENSG00000258890	CEP95	17	+	64530925	64531139	64530925	64531018	64531889	64532022	24462	4,16,11	43,51,29	2,4,1	33,27,27	260	139	0.00133456	0.04445	0.047,0.144,0.169	0.031,0.073,0.019	0.079	7.9
8998	ENSG00000129933	MAU2	19	+	19347279	19347370	19347279	19347366	19348888	19348938	8998	2,3,4	42,39,28	0,0,0	18,52,30	143	139	0.00149634	0.048281	0.044,0.07,0.122	0.0,0.0,0.0	0.079	7.9
34833	ENSG00000126226	PCID2	13	-	113208023	113208650	113208598	113208650	113200401	113200516	34833	192246170	253190143	91,81,106	145180201	714	139	3.65277e-08	1.42395e-05	0.129,0.201,0.188	0.109,0.081,0.093	0.078	7.8
29171	ENSG00000143761	ARF1	1	+	228082740	228082976	228082740	228082850	228097077	228097232	29171	10,13,10	58,84,48	3,0,0	66,40,25	265	139	9.28664e-07	0.000218998	0.083,0.075,0.099	0.023,0.0,0.0	0.078	7.8
38057	ENSG00000114503	NCBP2	3	-	196939211	196939432	196939392	196939432	196937509	196937631	38057	664693497	30,15,34	597716598	52,59,59	320	139	4.78939e-06	0.000795518	0.906,0.953,0.864	0.833,0.841,0.815	0.078	7.8
8359	ENSG00000064687	ABCA7	19	+	1049265	1049462	1049265	1049437	1050920	1051052	8359	7,4,2	46,39,42	0,0,0	33,40,29	164	139	8.65964e-05	0.00656397	0.114,0.08,0.039	0.0,0.0,0.0	0.078	7.8
3994	ENSG00000162576	MXRA8	1	-	1354311	1354474	1354353	1354474	1354192	1354232	3994	83,65,55	255205138	46,69,54	270326256	181	139	0.000134678	0.00902653	0.2,0.196,0.234	0.116,0.14,0.139	0.078	7.8
18817	ENSG00000197386	HTT	4	+	3213987	3214156	3213987	3214135	3215109	3215211	18817	9,9,2	59,49,32	4,1,0	56,53,40	160	139	0.000323871	0.0163446	0.117,0.138,0.052	0.058,0.016,0.0	0.078	7.8
12762	ENSG00000119596	YLPM1	14	+	74809909	74810019	74809909	74810002	74810224	74810420	12762	1,2,4	85,50,62	1,10,11	65,54,46	156	139	0.000793459	0.0308527	0.01,0.034,0.054	0.014,0.142,0.176	-0.078	7.8
12962	ENSG00000124357	NAGK	2	+	71068649	71068841	71068649	71068712	71070501	71070586	12962	15,22,8	65,97,55	2,5,2	91,92,71	268	139	2.72177e-08	1.09452e-05	0.107,0.105,0.07	0.011,0.027,0.014	0.077	7.7
171	ENSG00000177479	ARIH2	3	+	48924717	48924841	48924717	48924839	48927461	48927813	171	16,14,3	110,119,82	2,1,0	89,91,95	141	139	5.52982e-08	2.05102e-05	0.125,0.104,0.035	0.022,0.011,0.0	0.077	7.7
2765	ENSG00000147535	PLPP5	8	-	38268822	38268990	38268881	38268990	38268370	38268461	2765	56,56,52	233227170	42,15,24	223237199	198	139	3.36308e-06	0.000617691	0.144,0.148,0.177	0.117,0.043,0.078	0.077	7.7
27567	ENSG00000084636	COL16A1	1	-	31684108	31684231	31684116	31684231	31683949	31684003	27567	68,89,61	7,11,1	7,13,2	0,0,0	147	139	0.000280139	0.01495	0.902,0.884,0.983	1.0,1.0,1.0	-0.077	7.7
31938	ENSG00000135587	SMPD2	6	+	109442542	109442629	109442542	109442625	109442751	109442884	31938	20,14,10	97,102,71	4,7,7	73,95,112	143	139	0.000795452	0.0308527	0.167,0.118,0.12	0.051,0.067,0.057	0.077	7.7
12811	ENSG00000259024	TVP23C-CDRT4	17	-	15553684	15553829	15553764	15553829	15547058	15547148	12811	37,35,29	0,8,1	32,34,17	0,0,1	219	139	0.00109648	0.0386785	1.0,0.735,0.948	1.0,1.0,0.915	-0.077	7.7
30045	ENSG00000100083	GGA1	22	+	37609039	37609356	37609039	37609150	37614189	37614274	30045	143,172,56	2,11,4	109,129,90	3,0,1	345	139	0.00123004	0.0417998	0.966,0.863,0.849	0.936,1.0,0.973	-0.077	7.7
34899	ENSG00000012171	SEMA3B	3	+	50271087	50271181	50271087	50271177	50271360	50271480	34899	69,54,37	13,8,5	25,14,12	1,0,2	143	139	0.00147772	0.0480058	0.838,0.868,0.878	0.96,1.0,0.854	-0.077	7.7
18956	ENSG00000040531	CTNS	17	+	3658004	3658216	3658004	3658175	3659857	3659975	18956	8,12,2	61,66,32	1,0,2	60,57,79	180	139	1.07058e-06	0.000240585	0.092,0.123,0.046	0.013,0.0,0.019	0.076	7.6
33246	ENSG00000146085	MUT	6	-	49463102	49463191	49463167	49463191	49459081	49459505	33246	259309242	14,22,12	293296222	31,40,30	204	139	9.10332e-05	0.00679246	0.926,0.905,0.932	0.866,0.834,0.834	0.076	7.6
19765	ENSG00000102078	SLC25A14	X	+	130364627	130364844	130364627	130364752	130365540	130365676	19765	12,13,9	70,64,41	3,2,2	39,45,51	231	139	0.000114922	0.00810032	0.094,0.109,0.117	0.044,0.026,0.023	0.076	7.6
8699	ENSG00000163516	ANKZF1	2	+	219230227	219230405	219230227	219230350	219231927	219232040	8699	216222146	34,27,13	142170166	5,9,12	194	139	0.000225822	0.0131111	0.82,0.855,0.889	0.953,0.931,0.908	-0.076	7.6
16667	ENSG00000181045	SLC26A11	17	+	80220918	80221115	80220918	80220950	80221547	80221794	16667	167178108	6,0,0	86,191,98	4,7,7	304	139	0.00116453	0.0404809	0.927,1.0,1.0	0.908,0.926,0.865	0.076	7.6
19759	ENSG00000074356	NCBP3	17	-	3823792	3825050	3824941	3825050	3821952	3822052	19759	189174128	149,138,99	65,67,47	111172127	1288	139	6.43929e-15	2.23637e-11	0.12,0.12,0.122	0.059,0.04,0.038	0.075	7.5
15536	ENSG00000103091	WDR59	16	-	74909783	74909917	74909821	74909917	74909500	74909657	15536	14,5,3	61,43,36	2,1,3	72,73,56	177	139	3.38819e-05	0.00331895	0.153,0.084,0.061	0.021,0.011,0.04	0.075	7.5
14052	ENSG00000158201	ABHD3	18	-	21663677	21664230	21664117	21664230	21659169	21659343	14052	63,64,57	104,84,58	33,32,23	93,68,75	579	139	5.01815e-05	0.00451663	0.127,0.155,0.191	0.078,0.102,0.069	0.075	7.5
20663	ENSG00000166295	ANAPC16	10	+	72216028	72216232	72216028	72216072	72230365	72230440	20663	30,29,25	133,167,65	5,6,1	65,55,30	299	139	5.97724e-05	0.00501196	0.095,0.075,0.152	0.035,0.048,0.015	0.075	7.5
23304	ENSG00000140829	DHX38	16	+	72106004	72106117	72106004	72106104	72107339	72107548	23304	124118100	18,18,9	120,98,96	1,8,5	152	139	0.000144623	0.0095424	0.863,0.857,0.91	0.991,0.918,0.946	-0.075	7.5
28044	ENSG00000104907	TRMT1	19	-	13116135	13116340	13116145	13116340	13115996	13116052	28044	16,21,16	115141100	6,8,4	103,126,99	149	139	0.00015013	0.00983248	0.115,0.122,0.13	0.052,0.056,0.036	0.074	7.4
4943	ENSG00000135365	PHF21A	11	-	45971115	45971364	45971177	45971364	45969814	45969904	4943	77,92,51	7,5,4	86,77,85	0,2,2	201	139	0.000446544	0.0206031	0.884,0.927,0.898	1.0,0.964,0.967	-0.074	7.4
29093	ENSG00000117385	P3H1	1	-	42755072	42755209	42755164	42755209	42754868	42754990	29093	30,47,14	79,116,55	22,15,24	104118118	231	139	0.000478128	0.0217641	0.186,0.196,0.133	0.113,0.071,0.109	0.074	7.4
3021	ENSG00000163938	GNL3	3	+	52686015	52686202	52686015	52686059	52686768	52686827	3021	84,94,75	0,11,5	30,41,46	0,2,0	282	139	0.000735566	0.0292326	1.0,0.808,0.881	1.0,0.91,1.0	-0.074	7.4
37036	ENSG00000101844	ATG4A	X	+	108137803	108137991	108137803	108137884	108150151	108150297	37036	75,94,76	0,0,0	64,83,84	6,4,0	246	139	0.00082312	0.0316992	1.0,1.0,1.0	0.858,0.921,1.0	0.074	7.4
1662	ENSG00000066279	ASPM	1	-	197125028	197125191	197125045	197125191	197124869	197124955	1662	5,4,0	30,25,14	0,1,0	19,28,25	156	139	0.000882432	0.033148	0.129,0.125,0.0	0.0,0.031,0.0	0.074	7.4
17415	ENSG00000091157	WDR7	18	+	56672496	56672678	56672496	56672674	56679331	56679438	17415	0,0,2	43,28,23	0,5,4	19,31,20	143	139	0.00155846	0.0499059	0.0,0.0,0.078	0.0,0.136,0.163	-0.074	7.4
28599	ENSG00000115307	AUP1	2	-	74528247	74528321	74528252	74528321	74527936	74528006	28599	292232159	34,25,18	217213276	4,5,14	144	139	7.90913e-08	2.77204e-05	0.892,0.9,0.895	0.981,0.976,0.95	-0.073	7.3
14403	ENSG00000141582	CBX4	17	-	79836011	79836145	79836091	79836145	79835479	79835712	14403	149168122	15,4,7	76,97,70	0,1,1	219	139	1.04992e-05	0.0014274	0.863,0.964,0.917	1.0,0.984,0.978	-0.073	7.3
16909	ENSG00000146414	SHPRH	6	-	145910415	145910636	145910447	145910636	145894884	145894977	16909	9,1,2	34,50,34	0,1,0	28,39,32	171	139	0.000387295	0.0187764	0.177,0.016,0.046	0.0,0.02,0.0	0.073	7.3
40575	ENSG00000143224	PPOX	1	+	161167099	161167486	161167099	161167234	161167994	161168127	40575	133135105	5,3,4	114146112	0,2,0	391	139	0.000493207	0.0221932	0.904,0.941,0.903	1.0,0.963,1.0	-0.072	7.2
10760	ENSG00000101084	C20orf24	20	+	36605788	36606032	36605788	36606027	36607889	36608000	10760	27,29,17	1,0,0	31,33,25	1,9,0	144	139	0.000669738	0.0276008	0.963,1.0,1.0	0.968,0.78,1.0	0.072	7.2
29094	ENSG00000117385	P3H1	1	-	42755096	42755217	42755164	42755217	42754868	42754990	29094	27,40,10	79,116,55	16,12,22	104118118	207	139	0.000734784	0.0292326	0.187,0.188,0.109	0.094,0.064,0.111	0.072	7.2
40908	ENSG00000172830	SSH3	11	+	67304815	67305007	67304815	67304913	67306837	67306962	40908	195227163	24,13,19	210198187	6,12,8	233	139	0.00117131	0.040569	0.829,0.912,0.837	0.954,0.908,0.933	-0.072	7.2
23105	ENSG00000130713	EXOSC2	9	+	130695491	130695606	130695491	130695593	130697581	130697757	23105	41,28,20	299295197	7,8,9	379404281	152	139	6.75571e-13	1.12212e-09	0.111,0.08,0.085	0.017,0.018,0.028	0.071	7.1
31992	ENSG00000176393	RNPEP	1	+	201999901	202000072	201999901	202000015	202001375	202001488	31992	59,41,42	329322213	18,18,20	345435326	196	139	1.61074e-11	1.86471e-08	0.113,0.083,0.123	0.036,0.029,0.042	0.071	7.1
38806	ENSG00000001631	KRIT1	7	-	92235402	92235605	92235533	92235605	92234807	92234923	38806	325343220	14,20,6	216226232	0,1,1	270	139	2.78981e-09	1.76435e-06	0.923,0.898,0.95	1.0,0.991,0.992	-0.071	7.1
16365	ENSG00000165526	RPUSD4	11	-	126209490	126209722	126209520	126209722	126205687	126205781	16365	9,15,9	116,111,80	1,2,2	96129134	169	139	4.78186e-08	1.80873e-05	0.06,0.1,0.085	0.008,0.013,0.012	0.071	7.1
21797	ENSG00000135297	MTO1	6	+	73479935	73480367	73479935	73480126	73480674	73480805	21797	64,44,31	128,164,91	6,16,25	94,90,146	380	139	8.05654e-07	0.000196041	0.155,0.089,0.111	0.023,0.061,0.059	0.071	7.1
15818	ENSG00000131470	PSMC3IP	17	-	42573818	42574210	42574098	42574210	42573481	42573623	15818	24,17,18	80,78,35	6,21,9	111143113	419	139	1.68431e-06	0.000357477	0.091,0.067,0.146	0.018,0.046,0.026	0.071	7.1
11339	ENSG00000131778	CHD1L	1	+	147286297	147286496	147286297	147286432	147287634	147287733	11339	121,115,76	10,5,4	107,100,97	1,1,0	203	139	1.0355e-05	0.00142086	0.892,0.94,0.929	0.987,0.986,1.0	-0.071	7.1
7303	ENSG00000171453	POLR1C	6	+	43519762	43519905	43519762	43519838	43520065	43520185	7303	30,28,18	131,129,83	13,17,23	191190190	206	139	2.44718e-05	0.00267879	0.134,0.128,0.128	0.044,0.057,0.076	0.071	7.1
34092	ENSG00000140479	PCSK6	15	-	101398401	101398576	101398403	101398576	101393211	101393424	34092	7,1,4	60,57,38	0,0,0	49,73,34	141	139	0.000190383	0.0116	0.103,0.017,0.094	0.0,0.0,0.0	0.071	7.1
17855	ENSG00000217801	RP11-465B22.3	1	+	1063078	1063317	1063078	1063201	1065829	1066456	17855	8,4,4	25,33,22	3,0,0	17,19,27	255	139	0.000663844	0.0274943	0.149,0.062,0.09	0.088,0.0,0.0	0.071	7.1
7877	ENSG00000033100	CHPF2	7	+	151235450	151235628	151235450	151235612	151236407	151236590	7877	7,18,9	132,118,86	1,3,0	87,82,100	155	139	4.96739e-07	0.000129095	0.045,0.12,0.086	0.01,0.032,0.0	0.07	7
170	ENSG00000177479	ARIH2	3	+	48924717	48924971	48924717	48924839	48927461	48927813	170	29,22,21	110,119,82	4,13,4	89,91,95	271	139	5.69117e-06	0.000903736	0.119,0.087,0.116	0.023,0.068,0.021	0.07	7
16364	ENSG00000165526	RPUSD4	11	-	126209493	126209722	126209520	126209722	126205687	126205781	16364	12,16,11	116,111,80	3,2,7	96129134	166	139	1.11861e-05	0.00150473	0.08,0.108,0.103	0.025,0.013,0.042	0.07	7
31873	ENSG00000168612	ZSWIM1	20	+	45881240	45881411	45881240	45881261	45882532	45884398	31873	12,1,0	26,16,13	0,0,0	35,32,41	289	139	1.66752e-05	0.00202236	0.182,0.029,0.0	0.0,0.0,0.0	0.07	7
36731	ENSG00000117791	2002-03-01	1	+	220780017	220780079	220780017	220780062	220780167	220780239	36731	72,88,66	2,7,9	84,95,95	0,1,2	156	139	2.00973e-05	0.00231258	0.97,0.918,0.867	1.0,0.988,0.977	-0.07	7
17275	ENSG00000163389	POGLUT1	3	+	119486832	119487078	119486832	119486932	119488928	119488987	17275	9,10,11	77,65,31	2,4,2	63,76,44	285	139	7.5328e-05	0.00592131	0.054,0.07,0.148	0.015,0.025,0.022	0.07	7
26286	ENSG00000175387	SMAD2	18	-	47930744	47930842	47930799	47930842	47896520	47896809	26286	9,4,5	41,65,40	0,4,0	63,54,42	194	139	0.000165673	0.0104788	0.136,0.042,0.082	0.0,0.05,0.0	0.07	7
5766	ENSG00000137411	VARS2	6	+	30909931	30910063	30909931	30910059	30910664	30910761	5766	88,92,48	5,11,6	90,113,99	3,4,0	143	139	0.000188009	0.0115104	0.945,0.89,0.886	0.967,0.965,1.0	-0.07	7
2330	ENSG00000132323	ILKAP	2	-	238194654	238194870	238194781	238194870	238194274	238194331	2330	11,2,1	22,19,13	0,1,1	5,10,13	266	139	0.00120291	0.0413149	0.207,0.052,0.039	0.0,0.05,0.039	0.07	7
29170	ENSG00000143761	ARF1	1	+	228082740	228082972	228082740	228082850	228097077	228097232	29170	9,11,8	58,84,48	2,0,0	66,40,25	261	139	2.35124e-06	0.000465411	0.076,0.065,0.082	0.016,0.0,0.0	0.069	6.9
2877	ENSG00000107815	C10orf2	10	+	100990435	100990663	100990435	100990543	100990868	100991010	2877	0,15,10	54,52,43	0,3,1	36,51,76	259	139	6.02494e-06	0.000941574	0.0,0.134,0.111	0.0,0.031,0.007	0.069	6.9
25032	ENSG00000137103	TMEM8B	9	+	35845974	35846073	35845974	35846068	35846257	35846381	25032	5,3,10	84,75,56	0,1,1	83,71,49	144	139	3.0687e-05	0.00312622	0.054,0.037,0.147	0.0,0.013,0.019	0.069	6.9
40836	ENSG00000172432	GTPBP2	6	-	43627168	43627353	43627278	43627353	43626922	43626948	40836	21,18,14	93,90,71	2,4,3	45,42,53	249	139	9.96606e-05	0.00724909	0.112,0.1,0.099	0.024,0.05,0.031	0.069	6.9
32547	ENSG00000187605	TET3	2	+	74087829	74088038	74087829	74087996	74089896	74090047	32547	49,40,45	0,0,0	52,78,62	4,5,2	181	139	0.000554268	0.0240348	1.0,1.0,1.0	0.909,0.923,0.96	0.069	6.9
36821	ENSG00000129317	PUS7L	12	-	43754335	43755261	43755216	43755261	43748449	43748609	36821	472352281	0,0,2	323337329	7,6,0	1020	139	0.000151646	0.00990315	1.0,1.0,0.95	0.863,0.884,1.0	0.068	6.8
33917	ENSG00000115514	TXNDC9	2	-	99332983	99333242	99333021	99333242	99327534	99327653	33917	28,33,29	178173130	9,12,9	111112140	177	139	0.000156786	0.0101006	0.11,0.13,0.149	0.06,0.078,0.048	0.068	6.8
25711	ENSG00000184277	TM2D3	15	-	101651695	101652391	101652270	101652391	101650003	101650161	25711	71,69,54	81,68,44	58,42,50	107,81,76	714	139	0.000504885	0.0224542	0.146,0.165,0.193	0.095,0.092,0.114	0.068	6.8
9926	ENSG00000092094	OSGEP	14	-	20448901	20449013	20448963	20449013	20448732	20448811	9926	33,24,23	145,111,90	8,12,16	103110110	201	139	0.000719128	0.0288179	0.136,0.13,0.15	0.051,0.07,0.091	0.068	6.8
2678	ENSG00000171903	CYP4F11	19	-	15924684	15924882	15924760	15924882	15923811	15924082	2678	3,7,1	36,31,24	0,0,0	20,19,12	215	139	0.000720658	0.0288286	0.051,0.127,0.026	0.0,0.0,0.0	0.068	6.8
9482	ENSG00000160688	FLAD1	1	+	154990158	154990528	154990158	154990257	154992712	154992786	9482	175175135	0,0,2	109102129	4,4,2	410	139	0.000916489	0.0340259	1.0,1.0,0.958	0.902,0.896,0.956	0.068	6.8
1366	ENSG00000172482	AGXT	2	+	240875934	240876129	240875934	240876004	240877536	240877632	1366	46,35,24	108,80,89	20,36,15	132107114	264	139	0.00100349	0.0361322	0.183,0.187,0.124	0.074,0.15,0.065	0.068	6.8
39592	ENSG00000115275	MOGS	2	-	74463253	74463386	74463379	74463386	74461068	74463012	39592	73,82,69	1,0,2	93,72,72	4,2,7	265	139	0.00126133	0.0424605	0.975,1.0,0.948	0.924,0.95,0.844	0.068	6.8
34176	ENSG00000149260	CAPN5	11	+	77116225	77116303	77116225	77116293	77118156	77118352	34176	107,161,99	10,6,8	113119126	1,0,0	149	139	6.22156e-07	0.000155348	0.909,0.962,0.92	0.991,1.0,1.0	-0.067	6.7
11707	ENSG00000164180	TMEM161B	5	-	88220562	88220719	88220589	88220719	88207028	88207180	11707	62,77,64	2,6,6	56,54,50	0,0,1	166	139	0.000156353	0.0100898	0.963,0.915,0.899	1.0,1.0,0.977	-0.067	6.7
26612	ENSG00000168101	NUDT16L1	16	+	4693977	4694308	4693977	4694238	4694957	4695859	26612	91,87,65	247279156	55,66,80	333299283	209	139	0.000287675	0.0150989	0.197,0.172,0.217	0.099,0.128,0.158	0.067	6.7
3579	ENSG00000103365	GGA2	16	-	23495688	23495778	23495693	23495778	23494302	23494378	3579	15,7,19	127,129,95	6,3,3	96,119,84	144	139	0.000388785	0.0188248	0.102,0.05,0.162	0.057,0.024,0.033	0.067	6.7
4964	ENSG00000099817	POLR2E	19	-	1093903	1095375	1095258	1095375	1091791	1091907	4964	247425101677	30,35,17	247324252367	46,48,56	1494	139	0.000844441	0.0322507	0.885,0.87,0.902	0.833,0.825,0.797	0.067	6.7
9955	ENSG00000073536	NLE1	17	-	35139819	35140066	35139848	35140066	35139234	35139314	9955	14,15,12	87,88,62	14,10,8	127158143	168	139	0.0014357	0.0471204	0.117,0.124,0.138	0.084,0.05,0.044	0.067	6.7
1370	ENSG00000172482	AGXT	2	+	240875934	240876135	240875934	240876004	240877536	240877632	1370	46,36,24	108,80,89	19,39,15	132107114	270	139	0.0014862	0.0481056	0.18,0.188,0.122	0.069,0.158,0.063	0.067	6.7
16560	ENSG00000225648	SBDSP1	7	+	72830691	72830825	72830691	72830813	72831601	72831798	16560	10,7,2	70,65,62	2,1,0	69,76,78	151	139	1.71658e-05	0.00205851	0.116,0.09,0.029	0.026,0.012,0.0	0.066	6.6
23087	ENSG00000102901	CENPT	16	-	67832227	67832545	67832454	67832545	67832011	67832108	23087	228231152	15,4,6	145145167	3,2,0	366	139	0.000357442	0.0176198	0.852,0.956,0.906	0.948,0.965,1.0	-0.066	6.6
37283	ENSG00000139631	CSAD	12	-	53171176	53171394	53171325	53171394	53170416	53170502	37283	32,16,16	90,86,62	5,8,2	56,45,44	288	139	0.000375846	0.0183847	0.146,0.082,0.111	0.041,0.079,0.021	0.066	6.6
30534	ENSG00000170445	HARS	5	-	140679001	140679127	140679061	140679127	140677907	140678015	30534	658724449	11,22,12	494542483	51,40,26	199	139	8.28442e-10	5.9715e-07	0.977,0.958,0.963	0.871,0.904,0.928	0.065	6.5
16442	ENSG00000168397	ATG4B	2	+	241671311	241671551	241671311	241671405	241672190	241673849	16442	42,55,34	185180110	20,16,16	127160152	285	139	5.00689e-06	0.000824475	0.1,0.13,0.131	0.071,0.047,0.049	0.065	6.5
18763	ENSG00000012061	ERCC1	19	-	45423704	45423839	45423780	45423839	45423272	45423381	18763	2,10,3	42,51,19	0,1,0	9,15,13	215	139	0.000585903	0.0249936	0.03,0.113,0.093	0.0,0.041,0.0	0.065	6.5
13147	ENSG00000088179	PTPN4	2	+	119915178	119916690	119915178	119915242	119920068	119920241	13147	55,38,34	31,40,19	21,22,12	26,37,27	1587	139	0.00018944	0.011561	0.134,0.077,0.135	0.066,0.05,0.037	0.064	6.4
26887	ENSG00000148985	PGAP2	11	+	3823882	3824135	3823882	3824097	3824269	3824376	26887	255261166	1,0,0	215252214	10,20,8	177	139	3.56639e-10	3.02771e-07	0.995,1.0,1.0	0.944,0.908,0.955	0.063	6.3
27344	ENSG00000169251	NMD3	3	+	161224929	161225147	161224929	161225064	161227246	161227343	27344	31,22,19	246215195	29,39,42	147185146	222	139	3.55716e-05	0.00342646	0.073,0.06,0.057	0.11,0.117,0.153	-0.063	6.3
15128	ENSG00000151445	VIPAS39	14	-	77435165	77435393	77435258	77435393	77434261	77434303	15128	13,9,11	86,68,62	2,4,0	54,58,52	232	139	4.51855e-05	0.00413962	0.083,0.073,0.096	0.022,0.04,0.0	0.063	6.3
35928	ENSG00000204859	ZBTB48	1	+	6585918	6586050	6585918	6586030	6586694	6586787	35928	6,12,1	46,81,53	1,2,0	59,57,54	159	139	5.54513e-05	0.00477118	0.102,0.115,0.016	0.015,0.03,0.0	0.063	6.3
3956	ENSG00000125503	PPP1R12C	19	-	55094344	55094435	55094354	55094435	55093015	55093233	3956	109,81,59	7,6,3	50,50,55	0,0,0	149	139	8.03678e-05	0.00622629	0.936,0.926,0.948	1.0,1.0,1.0	-0.063	6.3
9267	ENSG00000189339	SLC35E2B	1	-	1670036	1670151	1670097	1670151	1669663	1669736	9267	32,21,14	106132109	14,9,11	123169126	200	139	0.000197249	0.0118297	0.173,0.1,0.082	0.073,0.036,0.057	0.063	6.3
25973	ENSG00000174365	SNHG11	20	+	38446709	38447012	38446709	38446948	38447465	38447623	25973	108104109	8,6,3	36,52,53	0,1,0	203	139	0.000212199	0.0125684	0.902,0.922,0.961	1.0,0.973,1.0	-0.063	6.3
3224	ENSG00000171813	PWWP2B	10	+	132397167	132397351	132397167	132397298	132404625	132405986	3224	258309244	16,18,11	360355225	44,30,29	192	139	0.000350688	0.0173092	0.921,0.926,0.941	0.856,0.895,0.849	0.063	6.3
32003	ENSG00000176393	RNPEP	1	+	201996146	201996409	201996146	201996263	201997318	201997554	32003	59,52,51	262241208	30,39,18	403332338	285	139	9.13302e-11	9.18181e-08	0.099,0.095,0.107	0.035,0.054,0.025	0.062	6.2
9259	ENSG00000119321	FKBP15	9	-	113183740	113183845	113183750	113183845	113182795	113182868	9259	6,4,5	57,83,50	1,0,1	59,61,62	149	139	0.000204019	0.0121594	0.089,0.043,0.085	0.016,0.0,0.015	0.062	6.2
39405	ENSG00000172663	TMEM134	11	-	67468016	67468092	67468027	67468092	67467500	67467590	39405	59,78,67	371477230	51,75,49	426581523	150	139	0.000239714	0.0135873	0.128,0.132,0.213	0.1,0.107,0.08	0.062	6.2
37175	ENSG00000005889	ZFX	X	+	24207711	24207859	24207711	24207855	24208217	24208370	37175	10,6,2	61,66,32	1,0,2	37,50,29	143	139	0.00029238	0.0152802	0.137,0.081,0.057	0.026,0.0,0.063	0.062	6.2
22807	ENSG00000101166	PRELID3B	20	-	59036471	59036573	59036500	59036573	59033144	59035126	22807	187216102	19,15,8	134167121	2,2,6	168	139	3.66483e-05	0.00349613	0.891,0.923,0.913	0.982,0.986,0.943	-0.061	6.1
34988	ENSG00000140939	NOL3	16	+	67174161	67174464	67174161	67174300	67174620	67174944	34988	300380332	17,23,19	417453407	18,8,6	303	139	0.000206399	0.012282	0.89,0.883,0.889	0.914,0.963,0.969	-0.061	6.1
10120	ENSG00000102871	TRADD	16	-	67159824	67159898	67159837	67159898	67156509	67156668	10120	0,0,2	63,81,67	4,2,7	79,71,39	152	139	0.000752299	0.0296902	0.0,0.0,0.027	0.044,0.025,0.141	-0.061	6.1
19259	ENSG00000103275	UBE2I	16	+	1312346	1312667	1312346	1312603	1314019	1314096	19259	11,7,3	54,55,32	3,1,1	41,45,39	203	139	0.000782336	0.0307169	0.122,0.08,0.06	0.048,0.015,0.017	0.061	6.1
24316	ENSG00000172053	QARS	3	-	49104324	49104471	49104372	49104471	49103862	49103972	24316	177172102	21,22,8	212221217	9,15,10	187	139	0.00137147	0.0453236	0.862,0.853,0.905	0.946,0.916,0.942	-0.061	6.1
11396	ENSG00000185728	YTHDF3	8	+	63168660	63168901	63168660	63168814	63169386	63169411	11396	365408280	34,18,15	335316298	13,5,3	226	139	1.0029e-05	0.0013959	0.868,0.933,0.92	0.941,0.975,0.984	-0.06	6
4001	ENSG00000140526	ABHD2	15	+	89102499	89102735	89102499	89102576	89103902	89104044	4001	8,8,6	62,63,39	0,0,0	18,28,21	298	139	4.3251e-05	0.00403005	0.057,0.056,0.067	0.0,0.0,0.0	0.06	6
10070	ENSG00000160087	UBE2J2	1	-	1273498	1273837	1273665	1273837	1267861	1267992	10070	244253139	386389314	256165112	530469373	306	139	0.000133752	0.008996	0.223,0.228,0.167	0.18,0.138,0.12	0.06	6
15160	ENSG00000155229	MMS19	10	-	97461495	97461896	97461827	97461896	97460906	97461007	15160	209189143	6,5,2	156145183	0,0,2	471	139	0.000527799	0.0231233	0.911,0.918,0.955	1.0,1.0,0.964	-0.06	6
33583	ENSG00000125458	NT5C	17	-	75130964	75131281	75131044	75131281	75130752	75130867	33583	75,104,60	285248176	47,63,50	256270236	219	139	0.000674183	0.0277444	0.143,0.21,0.178	0.104,0.129,0.119	0.06	6
27685	ENSG00000095485	CWF19L1	10	-	100267525	100267680	100267570	100267680	100261978	100262063	27685	1,4,7	40,58,30	1,0,0	18,36,29	184	139	0.00121202	0.0414527	0.019,0.05,0.15	0.04,0.0,0.0	0.06	6
4018	ENSG00000203666	EFCAB2	1	+	245082082	245082166	245082082	245082162	245083441	245083484	4018	3,2,6	61,63,51	0,0,0	46,31,50	143	139	0.00133446	0.04445	0.046,0.03,0.103	0.0,0.0,0.0	0.06	6
18965	ENSG00000187735	TCEA1	8	-	54021379	54021586	54021525	54021586	54010429	54010492	18965	6,6,6	23,45,29	0,3,1	29,19,31	285	139	0.00149581	0.048281	0.113,0.061,0.092	0.0,0.072,0.015	0.06	6
19997	ENSG00000116560	SFPQ	1	-	35186946	35187122	35187000	35187122	35182931	35184593	19997	128131105	650693499	85,105,73	9501019718	193	139	2.8172e-09	1.76435e-06	0.124,0.12,0.132	0.061,0.069,0.068	0.059	5.9
32864	ENSG00000063245	EPN1	19	+	55677549	55677734	55677549	55677581	55678526	55678855	32864	7,2,2	26,27,13	1,1,0	16,43,34	292	139	0.000840598	0.0321455	0.114,0.034,0.068	0.029,0.011,0.0	0.059	5.9
25918	ENSG00000106100	NOD1	7	-	30446957	30447148	30447014	30447148	30446140	30446224	25918	5,3,1	8,11,5	1,0,0	1,3,4	196	139	0.00111169	0.0390706	0.307,0.162,0.124	0.415,0.0,0.0	0.059	5.9
36763	ENSG00000111679	PTPN6	12	+	6956418	6956568	6956418	6956553	6957653	6957785	36763	200194136	12,22,2	151202154	0,3,0	154	139	1.797e-08	7.6547e-06	0.938,0.888,0.984	1.0,0.984,1.0	-0.058	5.8
7763	ENSG00000101158	NELFCD	20	+	58989857	58990232	58989857	58989988	58990909	58991075	7763	90,92,77	318303216	55,52,48	351442414	383	139	1.03087e-10	1.00981e-07	0.093,0.099,0.115	0.054,0.041,0.04	0.057	5.7
663	ENSG00000115942	ORC2	2	-	200913827	200913992	200913930	200913992	200913294	200913413	663	9,16,9	89,106,85	1,1,1	83,96,72	242	139	1.09615e-07	3.54883e-05	0.055,0.08,0.057	0.007,0.006,0.008	0.057	5.7
11791	ENSG00000167272	POP5	12	-	120580995	120581257	120581114	120581257	120579773	120579923	11791	113,95,81	353391275	71,66,59	438432399	258	139	2.52542e-06	0.000492238	0.147,0.116,0.137	0.08,0.076,0.074	0.057	5.7
36640	ENSG00000080823	MOK	14	-	102250755	102250990	102250811	102250990	102233686	102233789	36640	8,3,0	41,42,21	0,0,0	24,23,28	195	139	0.00071177	0.0286833	0.122,0.048,0.0	0.0,0.0,0.0	0.057	5.7
40310	ENSG00000157214	STEAP2	7	+	90211859	90211961	90211859	90211934	90225049	90225073	40310	132,164,65	4,6,3	147156132	18,14,9	166	139	0.00092862	0.0343096	0.965,0.958,0.948	0.872,0.903,0.925	0.057	5.7
28503	ENSG00000135720	DYNC1LI2	16	-	66751242	66751386	66751272	66751386	66749196	66749313	28503	54,43,25	364430255	20,10,7	330325269	169	139	3.59675e-08	1.41656e-05	0.109,0.076,0.075	0.047,0.025,0.021	0.056	5.6
24713	ENSG00000100889	PCK2	14	+	24094765	24094992	24094765	24094845	24096891	24097125	24713	46,32,10	156,118,85	7,4,7	62,71,67	286	139	5.83386e-05	0.00491989	0.125,0.116,0.054	0.052,0.027,0.048	0.056	5.6
37271	ENSG00000139631	CSAD	12	-	53171877	53171988	53171881	53171988	53171271	53171441	37271	10,5,7	92,102,76	0,1,2	48,53,46	143	139	0.000326948	0.0164781	0.096,0.045,0.082	0.0,0.018,0.041	0.055	5.5
29502	ENSG00000184575	XPOT	12	+	64425037	64425182	64425037	64425138	64425337	64425454	29502	11781257934	92,75,69	10301081970	25,30,21	183	139	2.43272e-12	3.20473e-09	0.907,0.927,0.911	0.969,0.965,0.972	-0.054	5.4
33556	ENSG00000105854	PON2	7	-	95416171	95416297	95416241	95416297	95412311	95412477	33556	75,68,71	460535350	38,28,41	506515519	209	139	7.89843e-09	4.13348e-06	0.098,0.078,0.119	0.048,0.035,0.05	0.054	5.4
8973	ENSG00000135845	PIGC	1	-	172443983	172444060	172443987	172444060	172441456	172442830	8973	2,3,2	161,166,84	8,7,14	95151129	143	139	1.84534e-05	0.00216081	0.012,0.017,0.023	0.076,0.043,0.095	-0.054	5.4
29413	ENSG00000004660	CAMKK1	17	-	3872444	3872627	3872553	3872627	3869800	3869888	29413	11,10,6	63,66,50	2,0,6	62,78,64	248	139	0.000167144	0.010545	0.089,0.078,0.063	0.018,0.0,0.05	0.054	5.4
7294	ENSG00000242802	AP5Z1	7	+	4783315	4783507	4783315	4783460	4783688	4783798	7294	12,13,1	74,82,47	2,1,1	48,55,29	186	139	0.000167282	0.010545	0.108,0.106,0.016	0.03,0.013,0.025	0.054	5.4
15584	ENSG00000123908	AGO2	8	-	140544091	140544303	140544212	140544303	140541163	140541358	15584	9,4,17	78,77,50	6,4,4	78107108	260	139	0.000678531	0.0278132	0.058,0.027,0.154	0.039,0.02,0.019	0.054	5.4
35682	ENSG00000132382	MYBBP1A	17	-	4542366	4542532	4542463	4542532	4541783	4541891	35682	49,35,23	199187166	19,16,14	181207200	236	139	1.19691e-05	0.00157739	0.127,0.099,0.075	0.058,0.044,0.04	0.053	5.3
38544	ENSG00000129484	PARP2	14	+	20344931	20345126	20344931	20345087	20345393	20345464	38544	24,23,12	165185151	8,6,6	167173170	178	139	1.31054e-05	0.00168009	0.102,0.088,0.058	0.036,0.026,0.027	0.053	5.3
10271	ENSG00000241058	NSUN6	10	-	18551812	18551971	18551822	18551971	18548111	18548237	10271	3,11,2	87,68,51	1,0,1	43,61,53	149	139	0.000274142	0.0148447	0.031,0.131,0.035	0.021,0.0,0.017	0.053	5.3
15756	ENSG00000128604	IRF5	7	+	128947022	128947115	128947022	128947056	128947229	128947535	15756	5,5,3	57,60,44	0,0,0	68,91,78	198	139	0.000305106	0.0156511	0.058,0.055,0.046	0.0,0.0,0.0	0.053	5.3
41069	ENSG00000196476	C20orf96	20	-	276779	276879	276792	276879	275967	276086	41069	7,8,7	105,110,67	0,3,1	64,81,61	152	139	0.000323082	0.0163263	0.057,0.062,0.087	0.0,0.033,0.015	0.053	5.3
20100	ENSG00000100038	TOP3B	22	-	21967563	21967716	21967602	21967716	21965284	21965375	20100	2,3,0	69,66,91	2,8,6	38,71,45	178	139	0.000413348	0.0196407	0.022,0.034,0.0	0.039,0.081,0.094	-0.053	5.3
21105	ENSG00000080822	CLDND1	3	-	98521045	98521283	98521132	98521283	98518884	98518995	21105	8,9,17	85,67,79	5,4,2	74,78,63	226	139	0.000807794	0.0311719	0.055,0.076,0.117	0.04,0.031,0.019	0.053	5.3
26455	ENSG00000138593	SECISBP2L	15	-	49028020	49028168	49028143	49028168	49027364	49027480	26455	7,4,12	76,96,45	3,2,1	90,101,53	262	139	0.000141681	0.00939693	0.047,0.022,0.124	0.017,0.01,0.01	0.052	5.2
16268	ENSG00000160439	RDH13	19	-	55047104	55047488	55047386	55047488	55044342	55045309	16268	25,24,15	80,69,52	14,21,3	71,118,81	421	139	0.000422542	0.0199288	0.094,0.103,0.087	0.061,0.055,0.012	0.052	5.2
7585	ENSG00000151116	UEVLD	11	-	18566346	18566482	18566383	18566482	18564891	18565010	7585	108,103,88	5,4,4	110,96,115	0,0,0	176	139	0.000427986	0.0199811	0.945,0.953,0.946	1.0,1.0,1.0	-0.052	5.2
14466	ENSG00000126522	ASL	7	+	66086584	66086825	66086584	66086786	66087333	66087386	14466	93,68,62	5,6,1	88,86,86	0,0,2	178	139	0.000787027	0.0307823	0.936,0.898,0.98	1.0,1.0,0.971	-0.052	5.2
26499	ENSG00000060138	YBX3	12	-	10709907	10713333	10713210	10713333	10704054	10704148	26499	134313731026	431474342	722734721	460489513	3442	139	1.14908e-13	2.58225e-10	0.112,0.105,0.108	0.06,0.057,0.054	0.051	5.1
20700	ENSG00000101361	NOP56	20	+	2656137	2656316	2656137	2656214	2656400	2656549	20700	37,37,23	220231154	35,23,21	472537355	241	139	1.80332e-08	7.6547e-06	0.088,0.085,0.079	0.041,0.024,0.033	0.051	5.1
23276	ENSG00000171311	EXOSC1	10	-	97438662	97438703	97438669	97438703	97437699	97437750	23276	47,39,31	391367286	12,15,23	320362314	146	139	1.22568e-05	0.00159811	0.103,0.092,0.094	0.034,0.038,0.065	0.051	5.1
4536	ENSG00000172943	PHF8	X	-	53985744	53985946	53985815	53985946	53984913	53985227	4536	11,18,9	128,108,76	10,2,1	104155133	210	139	1.75727e-05	0.00209532	0.054,0.099,0.073	0.06,0.008,0.005	0.051	5.1
27762	ENSG00000126581	BECN1	17	-	42819510	42819609	42819547	42819609	42818786	42818877	27762	28,37,35	326273209	13,15,17	244300270	176	139	2.64206e-05	0.00284391	0.064,0.097,0.117	0.04,0.038,0.047	0.051	5.1
37866	ENSG00000165219	GAPVD1	9	+	125331925	125332060	125331925	125332017	125332509	125332629	37866	155,106,76	6,4,5	131,96,102	2,0,0	182	139	0.000401185	0.0191821	0.952,0.953,0.921	0.98,1.0,1.0	-0.051	5.1
37365	ENSG00000105552	BCAT2	19	-	48810794	48811020	48810983	48811020	48806999	48807074	37365	17,27,10	146145100	3,0,1	136170202	328	139	1.10212e-12	1.75434e-09	0.047,0.073,0.041	0.009,0.0,0.002	0.05	5
27351	ENSG00000100485	SOS2	14	-	50153069	50153173	50153076	50153173	50150156	50150230	27351	67,68,43	4,7,1	52,34,45	0,1,0	146	139	0.000854877	0.0324432	0.941,0.902,0.976	1.0,0.97,1.0	-0.05	5
Significant skipped exon (SE) events
ID	GeneID	geneSymbol	chr	strand	exonStart_0base	exonEnd	upstreamES	upstreamEE	downstreamES	downstreamEE	ID	IC_SAMPLE_1	SC_SAMPLE_1	IC_SAMPLE_2	SC_SAMPLE_2	IncFormLen	SkipFormLen	PValue	FDR	IncLevel1	IncLevel2	IncLevelDifference	AbsdPSI
129877	ENSG00000198521	ZNF43	19	-	21851162	21851360	21845391	21845506	21851904	21852029	129877	0,0,0	1,5,4	2,4,1	0,0,0	337	139	8.43769e-15	1.33345e-11	0.0,0.0,0.0	1.0,1.0,1.0	-1	100
8055	ENSG00000034152	MAP2K3	17	+	21295674	21295769	21287990	21288091	21298412	21298479	8055	0,0,0	1,2,4	1,1,1	0,0,0	234	139	8.63198e-13	9.41627e-10	0.0,0.0,0.0	1.0,1.0,1.0	-1	100
45835	ENSG00000100731	PCNX	14	+	71011526	71011549	70995740	70995925	71012999	71013202	45835	1,0,0	3,2,2	1,1,1	0,0,0	162	139	9.60343e-14	1.23311e-10	0.222,0.0,0.0	1.0,1.0,1.0	-0.926	92.6
13635	ENSG00000136936	XPA	9	-	97682199	97682428	97675770	97675802	97684922	97685040	13635	4,11,4	0,0,0	1,0,0	1,2,2	368	139	4.64795e-12	4.21852e-09	1.0,1.0,1.0	0.274,0.0,0.0	0.909	90.9
115662	ENSG00000144741	SLC25A26	3	+	66369477	66369542	66346363	66346408	66377689	66378079	115662	2,2,4	0,0,0	2,0,0	3,6,1	204	139	1.11022e-15	2.01256e-12	1.0,1.0,1.0	0.312,0.0,0.0	0.896	89.6
17139	ENSG00000181090	EHMT1	9	+	137650859	137651037	137646335	137646438	137716625	137717045	17139	1,2,0	2,4,1	2,1,1	0,0,0	317	139	1.40254e-12	1.49041e-09	0.18,0.18,0.0	1.0,1.0,1.0	-0.88	88
15604	ENSG00000248101	AC002116.8	19	-	36013318	36013422	36013020	36013089	36014174	36014235	15604	1,3,2	0,1,0	0,0,0	3,1,3	243	139	1.25257e-09	6.35121e-07	1.0,0.632,1.0	0.0,0.0,0.0	0.877	87.7
40891	ENSG00000137807	KIF23	15	+	69446430	69446587	69446008	69446091	69446870	69446950	40891	3,0,1	3,1,5	2,4,4	0,0,0	296	139	8.38218e-14	1.0992e-10	0.32,0.0,0.086	1.0,1.0,1.0	-0.865	86.5
28394	ENSG00000110274	CEP164	11	+	117359431	117359560	117355978	117356617	117361834	117361993	28394	6,7,4	1,0,0	0,1,0	1,2,1	268	139	5.09739e-10	2.86913e-07	0.757,1.0,1.0	0.0,0.206,0.0	0.85	85
15333	ENSG00000180776	ZDHHC20	13	-	21400372	21400493	21387507	21387634	21413651	21413774	15333	1,0,3	2,1,4	4,1,1	0,0,0	260	139	1.31827e-10	8.73652e-08	0.211,0.0,0.286	1.0,1.0,1.0	-0.834	83.4
5116	ENSG00000256349	CTD-3074O7.11	11	+	66519620	66519748	66515860	66515933	66526122	66526192	5116	2,4,3	0,0,0	5,0,0	2,1,1	267	139	0.000150216	0.00835588	1.0,1.0,1.0	0.566,0.0,0.0	0.811	81.1
6725	ENSG00000072849	DERL2	17	-	5486116	5486313	5485150	5485216	5486668	5486811	6725	1,3,1	0,0,0	1,0,2	2,2,1	336	139	1.34753e-08	4.80076e-06	1.0,1.0,1.0	0.171,0.0,0.453	0.792	79.2
30670	ENSG00000123106	CCDC91	12	+	28259363	28259442	28190445	28190641	28484051	28484165	30670	0,2,1	2,4,1	1,2,1	0,0,0	218	139	6.46936e-11	4.71869e-08	0.0,0.242,0.389	1.0,1.0,1.0	-0.79	79
35158	ENSG00000255571	MIR9-3HG	15	+	89379047	89379269	89378115	89378165	89387816	89387881	35158	5,6,5	2,0,0	0,2,0	1,4,2	361	139	1.31094e-08	4.69755e-06	0.49,1.0,1.0	0.0,0.161,0.0	0.776	77.6
123861	ENSG00000059915	PSD	10	-	102418700	102418759	102416709	102417121	102420080	102420288	123861	0,1,0	1,1,2	1,4,1	0,1,0	198	139	3.08569e-08	9.93118e-06	0.0,0.412,0.0	1.0,0.737,1.0	-0.775	77.5
125815	ENSG00000145012	LPP	3	+	188335113	188335197	188153874	188154021	188406111	188406313	125815	0,0,0	3,7,2	2,1,2	3,0,0	223	139	0.000101233	0.00620213	0.0,0.0,0.0	0.294,1.0,1.0	-0.765	76.5
125524	ENSG00000198830	HMGN2	1	+	26473548	26473585	26472516	26472627	26473702	26473738	125524	1,1,2	0,0,0	1,0,3	4,4,2	176	139	8.86091e-12	7.74651e-09	1.0,1.0,1.0	0.165,0.0,0.542	0.764	76.4
137425	ENSG00000133466	C1QTNF6	22	-	37185870	37186046	37185217	37185455	37188162	37188476	137425	1,2,1	0,1,0	0,0,1	1,1,2	315	139	1.29263e-05	0.00130819	1.0,0.469,1.0	0.0,0.0,0.181	0.763	76.3
4020	ENSG00000009830	POMT2	14	-	77302834	77302961	77299523	77299561	77304691	77304800	4020	4,4,4	0,0,0	0,1,2	5,2,1	266	139	1.70552e-12	1.75196e-09	1.0,1.0,1.0	0.0,0.207,0.511	0.761	76.1
57330	ENSG00000144785	RP11-977G19.10	12	-	56309965	56310029	56300159	56300220	56310957	56311054	57330	1,0,2	1,3,3	1,2,2	0,0,0	203	139	1.14709e-10	7.64318e-08	0.406,0.0,0.313	1.0,1.0,1.0	-0.76	76
24362	ENSG00000130985	UBA1	X	+	47206247	47206330	47203540	47203696	47209622	47209687	24362	3,8,1	1,0,0	2,0,0	2,1,6	222	139	4.57079e-10	2.60846e-07	0.653,1.0,1.0	0.385,0.0,0.0	0.756	75.6
68140	ENSG00000128915	ICE2	15	-	60478567	60478650	60476062	60476167	60479002	60479107	68140	1,3,4	0,3,0	1,0,0	4,2,2	222	139	5.22234e-07	0.000104165	1.0,0.385,1.0	0.135,0.0,0.0	0.75	75
117152	ENSG00000233251	AC007743.1	2	-	56180043	56180162	56179602	56179670	56184623	56184913	117152	2,1,3	0,0,0	6,0,0	1,2,4	258	139	2.13837e-09	1.01772e-06	1.0,1.0,1.0	0.764,0.0,0.0	0.745	74.5
13566	ENSG00000124588	NQO2	6	+	2989527	2989710	2987986	2988031	2993930	2994053	13566	1,5,4	0,0,0	2,0,3	1,2,3	322	139	1.23193e-08	4.45325e-06	1.0,1.0,1.0	0.463,0.0,0.302	0.745	74.5
13625	ENSG00000136936	XPA	9	-	97682199	97682430	97675770	97675802	97684922	97685040	13625	9,19,5	0,0,0	2,0,3	1,2,2	370	139	4.69338e-07	9.61027e-05	1.0,1.0,1.0	0.429,0.0,0.36	0.737	73.7
128095	ENSG00000157881	PANK4	1	-	2521744	2521941	2521260	2521315	2526463	2526596	128095	3,1,1	2,0,0	1,0,0	2,2,1	336	139	0.000195697	0.0100891	0.383,1.0,1.0	0.171,0.0,0.0	0.737	73.7
40655	ENSG00000065882	TBC1D1	4	+	38051898	38052060	38049617	38049859	38054198	38054338	40655	2,2,2	1,4,6	2,2,2	0,0,0	301	139	1.14908e-13	1.46024e-10	0.48,0.188,0.133	1.0,1.0,1.0	-0.733	73.3
94653	ENSG00000175792	RUVBL1	3	-	128068635	128068913	128064777	128065220	128097299	128097496	94653	34,17,22	2,1,1	3,1,2	6,3,4	417	139	1.4846e-11	1.24491e-08	0.85,0.85,0.88	0.143,0.1,0.143	0.731	73.1
141585	ENSG00000198270	TMEM116	12	-	111950387	111950466	111943264	111943369	111978735	111978787	141585	0,1,1	2,5,5	4,2,2	0,0,2	218	139	4.06362e-07	8.50537e-05	0.0,0.113,0.113	1.0,1.0,0.389	-0.721	72.1
54156	ENSG00000148057	IDNK	9	+	83626430	83626578	83623165	83623221	83628006	83628211	54156	0,0,0	3,3,8	3,1,1	0,3,0	287	139	0.000879563	0.0299423	0.0,0.0,0.0	1.0,0.139,1.0	-0.713	71.3
84413	ENSG00000167699	GLOD4	17	-	770100	770224	769868	769955	770420	770507	84413	1,1,2	1,0,0	0,1,0	1,2,1	263	139	6.18011e-06	0.000746197	0.346,1.0,1.0	0.0,0.209,0.0	0.712	71.2
136947	ENSG00000115760	BIRC6	2	+	32603388	32603533	32602496	32603083	32611447	32611581	136947	3,3,1	0,1,0	0,2,1	1,2,3	284	139	4.52725e-07	9.31654e-05	1.0,0.595,1.0	0.0,0.329,0.14	0.709	70.9
89082	ENSG00000099622	CIRBP	19	+	1262039	1262190	1261341	1261641	1264252	1264472	89082	1,2,1	8,2,13	5,1,1	2,0,0	290	139	3.02799e-05	0.00252709	0.057,0.324,0.036	0.545,1.0,1.0	-0.709	70.9
40855	ENSG00000178761	FAM219B	15	-	74900508	74900599	74899992	74900137	74901949	74902063	40855	0,0,5	1,2,9	3,2,1	0,2,0	230	139	0.000240907	0.0117981	0.0,0.0,0.251	1.0,0.377,1.0	-0.709	70.9
40862	ENSG00000178761	FAM219B	15	-	74900495	74900599	74899991	74900137	74901949	74902063	40862	0,0,5	1,2,9	4,2,1	0,2,0	243	139	0.000170968	0.00911292	0.0,0.0,0.241	1.0,0.364,1.0	-0.708	70.8
19723	ENSG00000271949	RP11-302M6.4	1	+	89925280	89925335	89846516	89846658	89929807	89929878	19723	0,0,0	1,2,7	1,6,3	1,0,1	194	139	1.89285e-11	1.56595e-08	0.0,0.0,0.0	0.417,1.0,0.682	-0.7	70
92256	ENSG00000134779	TPGS2	18	-	36781798	36781922	36780023	36780188	36798448	36798565	92256	10,3,1	0,0,1	0,0,2	6,5,3	263	139	6.21944e-10	3.45339e-07	1.0,1.0,0.346	0.0,0.0,0.261	0.695	69.5
59187	ENSG00000162194	LBHD1	11	-	62669691	62669803	62667522	62667747	62671239	62671391	59187	1,1,4	1,0,0	2,0,0	3,5,2	251	139	1.74625e-07	4.28796e-05	0.356,1.0,1.0	0.27,0.0,0.0	0.695	69.5
71963	ENSG00000122085	MTERF4	2	-	241090261	241090449	241089979	241090044	241099395	241099894	71963	3,3,4	0,0,3	0,0,2	4,1,2	327	139	6.63739e-06	0.000790504	1.0,1.0,0.362	0.0,0.0,0.298	0.688	68.8
42656	ENSG00000254286	RP11-89K10.1	8	+	126707185	126707240	126589191	126589290	126713285	126713415	42656	1,3,5	0,1,6	0,0,0	2,5,17	194	139	3.77236e-07	7.98983e-05	1.0,0.682,0.374	0.0,0.0,0.0	0.685	68.5
15879	ENSG00000112659	CUL9	6	+	43213780	43213852	43213437	43213567	43215193	43215326	15879	1,1,3	0,3,0	1,0,0	4,1,1	211	139	0.000136055	0.0077429	1.0,0.18,1.0	0.141,0.0,0.0	0.68	68
106728	ENSG00000106608	URGCP	7	-	43919796	43919973	43887414	43887485	43926131	43926411	106728	8,12,1	3,3,0	2,1,0	14,5,4	316	139	3.92496e-07	8.27039e-05	0.54,0.638,1.0	0.059,0.081,0.0	0.679	67.9
64744	ENSG00000080815	PSEN1	14	+	73138111	73138152	73137124	73137223	73147794	73147876	64744	0,0,0	10,1,3	4,3,2	1,0,4	180	139	3.40143e-08	1.07464e-05	0.0,0.0,0.0	0.755,1.0,0.279	-0.678	67.8
8939	ENSG00000268230	CTD-2619J13.8	19	-	58359196	58359323	58358488	58358585	58362676	58362751	8939	1,9,2	4,9,1	2,8,6	0,0,0	266	139	1.08045e-11	9.37912e-09	0.116,0.343,0.511	1.0,1.0,1.0	-0.677	67.7
23797	ENSG00000132698	RAB25	1	+	156068286	156068396	156065910	156066106	156069670	156070106	23797	1,2,1	5,1,1	2,2,10	0,0,0	249	139	9.01989e-10	4.7313e-07	0.1,0.528,0.358	1.0,1.0,1.0	-0.671	67.1
105881	ENSG00000256950	RP11-87C12.2	12	+	121890492	121890610	121888808	121888994	121899633	121899845	105881	1,2,3	0,0,0	0,0,3	2,2,0	257	139	3.44436e-06	0.000469664	1.0,1.0,1.0	0.0,0.0,1.0	0.667	66.7
93333	ENSG00000123352	SPATS2	12	+	49454224	49454385	49366904	49367021	49460769	49461037	93333	0,5,4	4,0,0	0,0,0	2,1,3	300	139	2.09743e-05	0.00189271	0.0,1.0,1.0	0.0,0.0,0.0	0.667	66.7
68419	ENSG00000136854	STXBP1	9	+	127639427	127639617	127612276	127612440	127642468	127642563	68419	0,0,0	1,1,5	5,3,0	0,0,2	329	139	2.85818e-05	0.0024115	0.0,0.0,0.0	1.0,1.0,0.0	-0.667	66.7
77795	ENSG00000103353	UBFD1	16	+	23564549	23564732	23564038	23564109	23566986	23567069	77795	2,0,12	0,7,0	0,0,0	10,4,2	322	139	8.75486e-05	0.00555422	1.0,0.0,1.0	0.0,0.0,0.0	0.667	66.7
89368	ENSG00000140463	BBS4	15	+	72727950	72727994	72724527	72724655	72731304	72731457	89368	2,0,0	4,1,4	1,2,1	2,0,0	183	139	9.3176e-05	0.00583021	0.275,0.0,0.0	0.275,1.0,1.0	-0.667	66.7
131377	ENSG00000119328	FAM206A	9	+	108936307	108936416	108934539	108934565	108939195	108939272	131377	2,2,1	0,0,0	0,2,0	2,0,1	248	139	9.55259e-05	0.00592016	1.0,1.0,1.0	0.0,1.0,0.0	0.667	66.7
74441	ENSG00000180902	D2HGDH	2	+	241749096	241749298	241748989	241749008	241750150	241750294	74441	11,14,3	0,0,0	4,3,0	2,1,1	341	139	0.000999279	0.0324922	1.0,1.0,1.0	0.449,0.55,0.0	0.667	66.7
49629	ENSG00000240344	PPIL3	2	-	200888955	200889029	200887612	200887683	200889243	200889296	49629	2,2,2	0,0,0	5,0,0	0,2,1	213	139	0.00130917	0.0394953	1.0,1.0,1.0	1.0,0.0,0.0	0.667	66.7
18722	ENSG00000234741	GAS5	1	-	173865541	173865565	173864256	173865282	173865856	173866206	18722	3,2,1	0,0,0	0,0,1	1,1,0	163	139	0.00146172	0.0426138	1.0,1.0,1.0	0.0,0.0,1.0	0.667	66.7
82822	ENSG00000267855	NDUFA7	19	-	8319300	8319394	8311411	8311595	8320856	8320934	82822	14,12,4	0,3,0	5,2,1	6,7,2	233	139	1.55473e-07	3.89778e-05	1.0,0.705,1.0	0.332,0.146,0.23	0.666	66.6
93441	ENSG00000123329	ARHGAP9	12	-	57479729	57479788	57479090	57479424	57480777	57480834	93441	8,3,2	4,0,2	0,0,0	1,2,2	198	139	7.36071e-09	2.85325e-06	0.584,1.0,0.412	0.0,0.0,0.0	0.665	66.5
129581	ENSG00000158186	MRAS	3	+	138349246	138349379	138348849	138349032	138349683	138350422	129581	3,3,6	0,0,0	5,2,1	5,2,1	272	139	7.01886e-09	2.74665e-06	1.0,1.0,1.0	0.338,0.338,0.338	0.662	66.2
47236	ENSG00000241769	LINC00893	X	-	149536173	149536238	149534099	149534374	149538114	149538172	47236	4,4,3	0,2,3	0,0,0	1,1,3	204	139	6.5275e-09	2.57893e-06	1.0,0.577,0.405	0.0,0.0,0.0	0.661	66.1
104620	ENSG00000204580	DDR1	6	+	30895424	30895514	30894505	30894671	30896730	30896865	104620	4,4,2	3,0,0	1,1,1	3,4,3	229	139	0.000110239	0.00662224	0.447,1.0,1.0	0.168,0.132,0.168	0.66	66
48892	ENSG00000106701	FSD1L	9	+	105479353	105479376	105471903	105472005	105484380	105484502	48892	9,5,3	9,15,7	9,16,16	1,0,0	162	139	5.89528e-14	7.89885e-11	0.462,0.222,0.269	0.885,1.0,1.0	-0.644	64.4
42093	ENSG00000213619	NDUFS3	11	+	47578863	47579024	47565905	47565986	47579268	47579696	42093	9,3,8	0,1,0	0,4,0	1,1,1	300	139	0.00134414	0.0402449	1.0,0.582,1.0	0.0,0.65,0.0	0.644	64.4
143283	ENSG00000224186	C5orf66	5	+	135313430	135313662	135296494	135296589	135337930	135338013	143283	2,4,5	0,1,0	1,3,2	1,3,5	371	139	6.40641e-07	0.000123198	1.0,0.6,1.0	0.273,0.273,0.13	0.641	64.1
54669	ENSG00000146963	LUC7L2	7	+	139366217	139366311	139365208	139365326	139371386	139371463	54669	4,3,3	2,3,0	0,0,0	1,5,1	233	139	6.72727e-08	1.9466e-05	0.544,0.374,1.0	0.0,0.0,0.0	0.639	63.9
89365	ENSG00000140463	BBS4	15	+	72727923	72727994	72724527	72724655	72731304	72731457	89365	3,0,0	4,1,4	1,2,1	2,0,0	210	139	0.000472852	0.0191293	0.332,0.0,0.0	0.249,1.0,1.0	-0.639	63.9
37133	ENSG00000186020	ZNF529	19	-	36587401	36587457	36582397	36582704	36589614	36589701	37133	1,7,0	1,6,4	1,5,1	0,1,0	195	139	2.94537e-06	0.000411641	0.416,0.454,0.0	1.0,0.781,1.0	-0.637	63.7
21488	ENSG00000170954	ZNF415	19	-	53115209	53115307	53107897	53109908	53115703	53115811	21488	6,3,1	0,0,0	1,0,2	6,1,0	237	139	3.26803e-05	0.00266253	1.0,1.0,1.0	0.089,0.0,1.0	0.637	63.7
134656	ENSG00000172456	FGGY	1	+	59316145	59316329	59315591	59315736	59321535	59321750	134656	0,3,0	1,2,2	6,1,2	0,0,2	323	139	5.04756e-05	0.00367512	0.0,0.392,0.0	1.0,1.0,0.301	-0.636	63.6
125844	ENSG00000145012	LPP	3	+	188154188	188154252	188153874	188154021	188406111	188406313	125844	3,2,0	3,7,2	4,3,1	3,0,0	203	139	0.000848802	0.0291934	0.406,0.164,0.0	0.477,1.0,1.0	-0.636	63.6
143835	ENSG00000169379	ARL13B	3	+	93995877	93995944	93980213	93980482	94035330	94035436	143835	3,2,1	5,6,2	2,5,5	0,0,2	206	139	3.26694e-06	0.000447948	0.288,0.184,0.252	1.0,1.0,0.628	-0.635	63.5
58360	ENSG00000141293	SKAP1	17	-	48363788	48363814	48345904	48346006	48396679	48396785	58360	2,2,10	1,0,1	0,1,4	5,4,4	165	139	7.41982e-07	0.000139424	0.628,1.0,0.894	0.0,0.174,0.457	0.63	63
87742	ENSG00000196684	HSH2D	19	+	16156560	16156774	16155641	16155763	16157209	16158148	87742	2,4,1	0,0,7	0,1,0	4,2,1	353	139	0.000353511	0.0155574	1.0,1.0,0.053	0.0,0.164,0.0	0.63	63
120313	ENSG00000183844	FAM3B	21	+	41319457	41320978	41305088	41305157	41322922	41323066	120313	27,45,38	2,2,0	7,1,9	6,1,5	1660	139	5.69274e-07	0.000111523	0.531,0.653,1.0	0.089,0.077,0.131	0.629	62.9
18191	ENSG00000135365	PHF21A	11	-	46117921	46118145	46092182	46092223	46118741	46118800	18191	2,10,6	1,0,0	5,0,2	3,1,4	363	139	8.53208e-07	0.000155351	0.434,1.0,1.0	0.39,0.0,0.161	0.628	62.8
43329	ENSG00000163344	PMVK	1	-	154932347	154932463	154929023	154929176	154936590	154936991	43329	0,2,0	16,8,3	0,3,1	1,0,0	255	139	0.000121537	0.00712387	0.0,0.12,0.0	0.0,1.0,1.0	-0.627	62.7
118674	ENSG00000165125	TRPV6	7	-	142876418	142876551	142875757	142875904	142876738	142876837	118674	2,3,3	3,2,2	1,7,2	0,0,0	272	139	1.06045e-08	3.90205e-06	0.254,0.434,0.434	1.0,1.0,1.0	-0.626	62.6
90143	ENSG00000174371	EXO1	1	+	241852388	241852411	241850408	241850586	241853357	241853481	90143	4,3,0	2,6,1	5,5,2	1,0,0	162	139	4.08516e-06	0.000535708	0.632,0.3,0.0	0.811,1.0,1.0	-0.626	62.6
84041	ENSG00000122678	POLM	7	-	44074397	44074468	44073782	44074025	44078739	44078811	84041	4,1,10	0,0,1	5,4,0	3,3,1	210	139	8.93402e-06	0.000995724	1.0,1.0,0.869	0.525,0.469,0.0	0.625	62.5
15584	ENSG00000248101	AC002116.8	19	-	36013327	36013422	36013020	36013089	36014174	36014235	15584	1,1,2	0,1,0	0,0,5	3,1,3	234	139	3.02027e-05	0.00252236	1.0,0.373,1.0	0.0,0.0,0.497	0.625	62.5
18186	ENSG00000135365	PHF21A	11	-	46117921	46118114	46092182	46092223	46118741	46118800	18186	2,9,7	1,0,0	5,0,2	3,1,4	332	139	8.30433e-07	0.000152329	0.456,1.0,1.0	0.411,0.0,0.173	0.624	62.4
99512	ENSG00000132837	DMGDH	5	-	79063612	79063787	79055809	79055908	79078060	79078261	99512	10,20,14	2,1,2	5,4,0	6,7,1	314	139	2.51368e-06	0.000364534	0.689,0.899,0.756	0.269,0.202,0.0	0.624	62.4
94652	ENSG00000175792	RUVBL1	3	-	128068635	128068913	128064777	128065220	128082482	128082574	94652	34,15,22	3,2,0	4,1,2	3,4,2	417	139	1.03651e-06	0.000181231	0.791,0.714,1.0	0.308,0.077,0.25	0.623	62.3
8556	ENSG00000132323	ILKAP	2	-	238188130	238188257	238184019	238184113	238194274	238194870	8556	3,2,3	0,2,0	0,7,0	4,4,2	266	139	0.000157462	0.00858842	1.0,0.343,1.0	0.0,0.478,0.0	0.622	62.2
29143	ENSG00000197989	SNHG12	1	-	28579941	28579981	28579532	28579587	28581589	28581818	29143	0,4,6	3,4,2	1,2,5	0,0,0	179	139	3.41796e-08	1.07471e-05	0.0,0.437,0.7	1.0,1.0,1.0	-0.621	62.1
69335	ENSG00000169057	MECP2	X	-	154058472	154058522	154039791	154039903	154092183	154092307	69335	2,6,1	0,3,2	0,0,0	8,2,4	189	139	1.0655e-06	0.000185248	1.0,0.595,0.269	0.0,0.0,0.0	0.621	62.1
6932	ENSG00000068400	GRIPAP1	X	-	49000565	49000689	48999437	48999504	49000860	49000959	6932	5,4,0	2,5,2	5,7,1	1,0,0	263	139	1.90524e-06	0.000293338	0.569,0.297,0.0	0.725,1.0,1.0	-0.62	62
88521	ENSG00000274840	RP11-320G10.1	3	+	18027396	18027537	18016617	18016711	18041448	18041541	88521	1,0,0	3,2,1	2,1,2	1,0,1	280	139	3.71862e-05	0.00292267	0.142,0.0,0.0	0.498,1.0,0.498	-0.618	61.8
22162	ENSG00000092978	GPATCH2	1	-	217492671	217492693	217491505	217491750	217495014	217495075	22162	3,4,3	0,2,0	3,1,1	6,2,4	161	139	5.27027e-06	0.000660803	1.0,0.633,1.0	0.302,0.302,0.178	0.617	61.7
81230	ENSG00000228106	RP11-452F19.3	1	+	222836971	222837066	222835118	222835215	222837218	222837229	81230	0,0,2	3,1,4	2,4,2	2,1,0	234	139	3.0069e-05	0.00251459	0.0,0.0,0.229	0.373,0.704,1.0	-0.616	61.6
128506	ENSG00000103852	TTC23	15	-	99249170	99249219	99245388	99245510	99249416	99249518	128506	3,6,1	1,1,1	0,1,0	6,8,5	188	139	5.34313e-09	2.21246e-06	0.689,0.816,0.425	0.0,0.085,0.0	0.615	61.5
79522	ENSG00000197647	ZNF433	19	-	12034827	12034874	12030139	12030198	12035536	12035688	79522	2,2,7	0,0,1	4,0,0	0,2,4	186	139	5.00078e-06	0.000631589	1.0,1.0,0.84	1.0,0.0,0.0	0.613	61.3
81971	ENSG00000107281	NPDC1	9	-	137040670	137040737	137040356	137040436	137041061	137041187	81971	0,3,0	3,1,1	2,3,4	0,2,0	206	139	1.33313e-05	0.00133919	0.0,0.669,0.0	1.0,0.503,1.0	-0.611	61.1
134084	ENSG00000169660	HEXDC	17	+	82440472	82440613	82439999	82440334	82440996	82441075	134084	5,15,4	10,5,9	5,2,8	0,0,1	280	139	3.49858e-07	7.48714e-05	0.199,0.598,0.181	1.0,1.0,0.799	-0.607	60.7
36351	ENSG00000162910	MRPL55	1	-	228108436	228108508	228107667	228107869	228108954	228109016	36351	0,0,1	1,2,3	0,4,1	1,0,0	211	139	2.29318e-05	0.00202488	0.0,0.0,0.18	0.0,1.0,1.0	-0.607	60.7
54723	ENSG00000146963	LUC7L2	7	+	139375508	139375583	139363175	139363259	139376061	139376156	54723	13,10,17	8,1,1	2,6,4	28,9,17	214	139	3.51617e-08	1.09729e-05	0.513,0.867,0.917	0.044,0.302,0.133	0.606	60.6
138662	ENSG00000136933	RABEPK	9	+	125220326	125220397	125203007	125203066	125220538	125220700	138662	5,2,3	0,0,0	2,0,1	0,8,3	210	139	5.15465e-08	1.53108e-05	1.0,1.0,1.0	1.0,0.0,0.181	0.606	60.6
6931	ENSG00000068400	GRIPAP1	X	-	49000565	49000685	48999437	48999504	49000860	49000959	6931	5,5,0	2,5,2	5,7,1	1,0,0	259	139	2.98373e-06	0.000415589	0.573,0.349,0.0	0.729,1.0,1.0	-0.602	60.2
56755	ENSG00000224189	HAGLR	2	-	176177710	176177856	176177331	176177494	176179028	176179098	56755	0,2,1	2,4,1	4,1,1	0,1,0	285	139	3.19744e-06	0.000439396	0.0,0.196,0.328	1.0,0.328,1.0	-0.601	60.1
93443	ENSG00000123329	ARHGAP9	12	-	57483894	57484033	57480777	57480834	57488611	57488726	93443	14,7,13	6,3,1	0,0,1	1,3,3	278	139	7.71981e-08	2.19579e-05	0.538,0.538,0.867	0.0,0.0,0.143	0.6	60
94319	ENSG00000120963	ZNF706	8	-	101204645	101204693	101202332	101202447	101205434	101205682	94319	0,2,0	3,8,11	3,6,3	3,0,2	187	139	5.86187e-07	0.000113612	0.0,0.157,0.0	0.426,1.0,0.527	-0.599	59.9
90742	ENSG00000167658	EEF2	19	-	3977881	3978007	3977427	3977610	3979328	3979436	90742	1,0,3	2,3,0	3,3,4	0,0,0	265	139	8.54159e-06	0.000962428	0.208,0.0,1.0	1.0,1.0,1.0	-0.597	59.7
50565	ENSG00000142541	RPL13A	19	+	49490474	49490600	49489849	49489922	49490778	49490833	50565	4,0,2	0,1,4	3,2,5	0,0,0	265	139	0.00133587	0.0400947	1.0,0.0,0.208	1.0,1.0,1.0	-0.597	59.7
36202	ENSG00000246273	SBF2-AS1	11	+	9780375	9780575	9758295	9758503	9807847	9808038	36202	6,7,1	2,3,2	4,1,1	0,0,0	339	139	6.0245e-08	1.76815e-05	0.552,0.489,0.17	1.0,1.0,1.0	-0.596	59.6
115941	ENSG00000063978	RNF4	4	+	2497006	2497121	2469103	2469258	2511955	2511965	115941	1,0,1	2,4,0	2,4,1	0,0,0	254	139	8.19008e-08	2.29447e-05	0.215,0.0,1.0	1.0,1.0,1.0	-0.595	59.5
25710	ENSG00000119950	MXI1	10	+	110245742	110245818	110244827	110244857	110260998	110261145	25710	4,5,2	0,5,2	0,0,0	8,2,1	215	139	1.04657e-07	2.78633e-05	1.0,0.393,0.393	0.0,0.0,0.0	0.595	59.5
11204	ENSG00000234719	RP11-166B2.1	16	-	11956143	11956237	11937539	11937668	11976567	11976643	11204	7,3,0	3,1,2	2,1,3	0,0,0	233	139	1.34643e-05	0.00135045	0.582,0.642,0.0	1.0,1.0,1.0	-0.592	59.2
34098	ENSG00000109111	SUPT6H	17	+	28668981	28669070	28668532	28668630	28670571	28670673	34098	0,3,2	1,4,3	1,1,2	0,1,0	228	139	4.22979e-05	0.00323044	0.0,0.314,0.289	1.0,0.379,1.0	-0.592	59.2
133280	ENSG00000124177	CHD6	20	-	41564010	41564113	41551304	41551360	41567499	41567601	133280	3,1,1	0,0,0	1,2,0	2,0,2	242	139	7.12811e-05	0.00474439	1.0,1.0,1.0	0.223,1.0,0.0	0.592	59.2
112198	ENSG00000134900	TPP2	13	+	102667757	102667883	102664794	102664936	102674282	102674411	112198	4,3,8	14,11,6	4,6,3	0,4,0	265	139	0.00101976	0.0329865	0.13,0.125,0.412	1.0,0.44,1.0	-0.591	59.1
129580	ENSG00000158186	MRAS	3	+	138349211	138349379	138348849	138349032	138349683	138350422	129580	4,1,9	0,0,0	7,5,1	5,2,1	307	139	6.43283e-09	2.5497e-06	1.0,1.0,1.0	0.388,0.531,0.312	0.59	59
42062	ENSG00000278610	RP11-455P21.3	1	+	222899780	222899865	222823883	222823945	222942806	222942970	42062	1,4,1	0,0,1	0,2,1	2,2,2	224	139	2.26927e-06	0.000338242	1.0,1.0,0.383	0.0,0.383,0.237	0.588	58.8
128110	ENSG00000258457	RP11-298I3.4	14	+	22990055	22990206	22989748	22989956	22997173	22997224	128110	4,0,3	0,4,0	0,0,2	2,2,3	290	139	0.000351423	0.0155209	1.0,0.0,1.0	0.0,0.0,0.242	0.586	58.6
112805	ENSG00000076685	NT5C2	10	-	103111744	103111805	103105705	103105801	103139405	103139479	112805	17,14,8	3,1,4	0,2,6	6,10,6	200	139	3.60572e-06	0.000486819	0.798,0.907,0.582	0.0,0.122,0.41	0.585	58.5
136855	ENSG00000272146	ARF4-AS1	3	+	57600058	57600169	57597795	57598051	57600742	57600920	136855	11,15,3	2,2,0	0,3,2	2,1,5	250	139	0.00023339	0.0114985	0.754,0.807,1.0	0.0,0.625,0.182	0.585	58.5
96736	ENSG00000140632	GLYR1	16	-	4813904	4813955	4812085	4812248	4814536	4814629	96736	4,3,3	6,3,0	0,0,0	6,3,5	190	139	2.89358e-07	6.40689e-05	0.328,0.422,1.0	0.0,0.0,0.0	0.583	58.3
127129	ENSG00000197121	PGAP1	2	-	196870940	196870979	196864986	196865080	196872440	196872549	127129	12,5,8	1,6,1	0,1,2	9,3,6	178	139	9.44836e-07	0.000168305	0.904,0.394,0.862	0.0,0.207,0.207	0.582	58.2
117010	ENSG00000230798	FOXD3-AS1	1	-	63323047	63323160	63321362	63321463	63323490	63323582	117010	3,3,1	4,2,0	0,0,0	2,5,2	252	139	0.000192232	0.00996043	0.293,0.453,1.0	0.0,0.0,0.0	0.582	58.2
145475	ENSG00000136518	ACTL6A	3	+	179575431	179575504	179574380	179574501	179576216	179576311	145475	1,3,5	11,5,1	2,8,4	0,1,0	212	139	5.16307e-07	0.000103812	0.056,0.282,0.766	1.0,0.84,1.0	-0.579	57.9
136298	ENSG00000179262	RAD23A	19	+	12949277	12949333	12948685	12948813	12952688	12952853	136298	0,3,1	2,0,2	2,2,1	0,0,0	195	139	0.000686937	0.0251043	0.0,1.0,0.263	1.0,1.0,1.0	-0.579	57.9
129013	ENSG00000136536	2007-03-01	2	+	159715532	159715766	159714556	159714598	159743060	159743253	129013	3,1,4	0,0,0	0,1,1	3,0,1	373	139	2.40213e-06	0.000353345	1.0,1.0,1.0	0.0,1.0,0.271	0.576	57.6
104327	ENSG00000136938	ANP32B	9	+	98002275	98002387	97998555	97998678	98004934	98005135	104327	7,5,4	3,0,1	0,0,4	3,1,2	251	139	0.000748629	0.0266555	0.564,1.0,0.689	0.0,0.0,0.526	0.576	57.6
107133	ENSG00000134686	PHC2	1	-	33368535	33368688	33367115	33367428	33370420	33370585	107133	8,12,10	0,0,0	3,4,10	2,2,8	292	139	9.98226e-11	6.83602e-08	1.0,1.0,1.0	0.417,0.488,0.373	0.574	57.4
11954	ENSG00000145014	TMEM44	3	-	194615568	194615670	194610915	194611020	194623223	194623310	11954	12,4,7	0,0,0	2,4,0	3,0,3	241	139	8.36456e-06	0.000946303	1.0,1.0,1.0	0.278,1.0,0.0	0.574	57.4
137178	ENSG00000037749	MFAP3	5	+	154219473	154219691	154218028	154218149	154220057	154220478	137178	17,10,2	0,0,1	0,5,3	2,2,4	357	139	5.18642e-07	0.000103812	1.0,1.0,0.438	0.0,0.493,0.226	0.573	57.3
127311	ENSG00000137522	RNF121	11	+	71987003	71987111	71960749	71960891	71994718	71994777	127311	8,2,1	1,0,0	7,3,4	3,8,4	247	139	1.78951e-06	0.000281361	0.818,1.0,1.0	0.568,0.174,0.36	0.572	57.2
94322	ENSG00000120963	ZNF706	8	-	101204649	101204693	101202332	101202447	101205434	101205682	94322	0,3,0	3,8,11	2,5,4	3,0,2	183	139	2.49269e-05	0.00216996	0.0,0.222,0.0	0.336,1.0,0.603	-0.572	57.2
143082	ENSG00000267213	AC007773.2	19	-	32391115	32391293	32390049	32390333	32399750	32399868	143082	7,4,3	0,0,0	2,3,9	3,2,2	317	139	7.74878e-08	2.19579e-05	1.0,1.0,1.0	0.226,0.397,0.664	0.571	57.1
143267	ENSG00000224186	C5orf66	5	+	135332697	135332793	135328709	135328825	135337930	135338013	143267	3,2,3	0,1,0	9,2,6	8,7,9	235	139	3.65074e-06	0.000489485	1.0,0.542,1.0	0.4,0.145,0.283	0.571	57.1
89783	ENSG00000162572	SCNN1D	1	+	1281201	1281297	1280471	1280666	1281410	1281610	89783	5,0,2	3,3,1	2,5,3	0,1,0	235	139	4.92084e-06	0.000623409	0.496,0.0,0.542	1.0,0.747,1.0	-0.57	57
100064	ENSG00000165115	KIF27	9	-	83859175	83859371	83853628	83853835	83870518	83870632	100064	1,5,6	0,0,0	5,0,2	0,2,2	335	139	0.000259054	0.0123963	1.0,1.0,1.0	1.0,0.0,0.293	0.569	56.9
38869	ENSG00000162804	SNED1	2	+	241040098	241040188	241037239	241037353	241048314	241048541	38869	1,1,3	0,0,0	2,1,1	0,4,3	229	139	1.4308e-06	0.000236422	1.0,1.0,1.0	1.0,0.132,0.168	0.567	56.7
137068	ENSG00000116852	KIF21B	1	-	200983055	200983094	200980959	200981096	200984858	200984972	137068	1,3,1	1,1,0	0,1,0	3,1,3	178	139	2.85576e-06	0.00040231	0.438,0.701,1.0	0.0,0.438,0.0	0.567	56.7
106301	ENSG00000078902	TOLLIP	11	-	1299877	1300017	1298148	1298564	1309465	1309583	106301	4,8,8	0,1,4	0,2,4	11,4,3	279	139	9.87019e-05	0.00607423	1.0,0.799,0.499	0.0,0.199,0.399	0.567	56.7
94666	ENSG00000175792	RUVBL1	3	-	128152611	128152810	128147228	128147364	128153202	128153914	94666	0,1,4	2,5,2	4,9,10	0,2,3	338	139	0.000504385	0.0200756	0.0,0.076,0.451	1.0,0.649,0.578	-0.567	56.7
21386	ENSG00000178971	CTC1	17	-	8243058	8243148	8238391	8238629	8248003	8248044	21386	1,0,0	2,1,2	4,2,2	2,0,2	229	139	1.26341e-05	0.00128496	0.233,0.0,0.0	0.548,1.0,0.378	-0.564	56.4
101621	ENSG00000241015	TPM3P9	19	+	53433592	53433750	53431983	53432028	53439827	53439933	101621	1,7,5	5,0,0	3,0,1	4,6,3	297	139	0.000531825	0.0208182	0.086,1.0,1.0	0.26,0.0,0.135	0.564	56.4
72002	ENSG00000122085	MTERF4	2	-	241090277	241090449	241089979	241090044	241091894	241091992	72002	2,4,2	0,3,2	0,0,0	1,2,4	311	139	3.24666e-05	0.00265213	1.0,0.373,0.309	0.0,0.0,0.0	0.561	56.1
118385	ENSG00000137098	SPAG8	9	-	35811181	35811399	35810882	35811057	35811923	35812001	118385	2,1,1	0,8,1	7,6,2	0,0,0	357	139	4.54678e-06	0.000586263	1.0,0.046,0.28	1.0,1.0,1.0	-0.558	55.8
10587	ENSG00000106290	TAF6	7	-	100115845	100115943	100114228	100114268	100119231	100119348	10587	2,5,3	2,1,0	0,1,1	2,2,2	237	139	2.01057e-05	0.00183176	0.37,0.746,1.0	0.0,0.227,0.227	0.554	55.4
15572	ENSG00000248101	AC002116.8	19	-	36013309	36013422	36013020	36013089	36014174	36014235	15572	3,1,2	0,1,0	4,0,2	3,1,3	252	139	2.55595e-05	0.00221253	1.0,0.355,1.0	0.424,0.0,0.269	0.554	55.4
90161	ENSG00000186010	NDUFA13	19	+	19526024	19526250	19515735	19516332	19527280	19527431	90161	13,21,13	1,8,1	0,4,3	4,9,2	365	139	2.33557e-05	0.00205496	0.832,0.5,0.832	0.0,0.145,0.364	0.552	55.2
41643	ENSG00000054282	SDCCAG8	1	+	243286271	243286397	243256055	243256240	243330539	243330692	41643	3,1,3	0,0,0	5,1,0	0,1,3	265	139	0.00130287	0.0393726	1.0,1.0,1.0	1.0,0.344,0.0	0.552	55.2
83898	ENSG00000166262	FAM227B	15	-	49577171	49577305	49576760	49576845	49588015	49588083	83898	3,5,2	4,5,2	3,1,12	1,0,0	273	139	6.00314e-07	0.000115986	0.276,0.337,0.337	0.604,1.0,1.0	-0.551	55.1
57378	ENSG00000136521	NDUFB5	3	+	179615982	179616049	179604808	179604939	179623919	179624376	57378	12,6,4	4,0,0	3,4,9	8,6,6	206	139	0.000193007	0.00999641	0.669,1.0,1.0	0.202,0.31,0.503	0.551	55.1
52634	ENSG00000110675	ELMOD1	11	+	107650884	107650908	107650334	107650403	107654171	107654222	52634	7,5,1	2,7,3	3,1,2	0,0,0	163	139	1.47325e-08	5.15919e-06	0.749,0.379,0.221	1.0,1.0,1.0	-0.55	55
9161	ENSG00000174796	THAP6	4	+	75527429	75527598	75521735	75521861	75539858	75539959	9161	5,8,7	3,8,2	1,9,8	0,0,0	308	139	1.08977e-10	7.30071e-08	0.429,0.311,0.612	1.0,1.0,1.0	-0.549	54.9
60888	ENSG00000174165	ZDHHC24	11	-	66524154	66524252	66520636	66521466	66526935	66527006	60888	3,12,5	0,0,0	1,1,2	2,4,0	237	139	1.27926e-05	0.00129573	1.0,1.0,1.0	0.227,0.128,1.0	0.548	54.8
9527	ENSG00000057593	F7	13	+	113113751	113113776	113105790	113105905	113113846	113113960	9527	2,1,6	3,0,0	3,0,0	1,3,2	164	139	0.000180932	0.00951489	0.361,1.0,1.0	0.718,0.0,0.0	0.548	54.8
76524	ENSG00000138617	PARP16	15	-	65248116	65248228	65234459	65234823	65259463	65259542	76524	0,1,2	3,1,0	2,1,1	0,0,0	251	139	0.000300072	0.0138122	0.0,0.356,1.0	1.0,1.0,1.0	-0.548	54.8
143088	ENSG00000136883	KIF12	9	-	114097300	114097436	114096386	114096478	114097606	114097757	143088	7,8,3	9,2,5	7,3,9	0,0,1	275	139	4.57719e-07	9.39815e-05	0.282,0.669,0.233	1.0,1.0,0.82	-0.545	54.5
83441	ENSG00000197530	MIB2	1	+	1625527	1625653	1625285	1625428	1626836	1626999	83441	4,3,2	3,2,1	1,2,7	0,0,0	265	139	1.23836e-06	0.000209683	0.412,0.44,0.512	1.0,1.0,1.0	-0.545	54.5
28154	ENSG00000101474	APMAP	20	-	24978766	24978882	24970196	24970371	24992593	24992979	28154	2,3,0	3,1,1	1,2,2	0,0,1	255	139	2.75119e-05	0.00234588	0.267,0.621,0.0	1.0,1.0,0.522	-0.545	54.5
128625	ENSG00000131966	ACTR10	14	+	58223600	58223701	58219693	58219729	58230398	58230480	128625	2,2,6	4,2,1	4,5,2	0,0,0	240	139	2.8278e-07	6.30333e-05	0.225,0.367,0.777	1.0,1.0,1.0	-0.544	54.4
5873	ENSG00000106723	SPIN1	9	+	88415606	88415699	88402011	88402135	88426381	88426591	5873	3,3,1	2,4,4	2,5,1	1,0,0	232	139	4.97872e-06	0.000630095	0.473,0.31,0.13	0.545,1.0,1.0	-0.544	54.4
48331	ENSG00000161040	FBXL13	7	-	102832839	102832974	102822039	102822203	102854776	102854860	48331	1,1,1	1,0,0	0,1,2	1,2,1	274	139	0.000341336	0.0151952	0.337,1.0,1.0	0.0,0.202,0.504	0.544	54.4
145532	ENSG00000196923	PDLIM7	5	-	177491403	177491420	177491009	177491146	177492404	177492435	145532	2,3,0	1,1,3	7,5,5	0,0,0	156	139	0.000343597	0.0152599	0.641,0.728,0.0	1.0,1.0,1.0	-0.544	54.4
133964	ENSG00000138794	CASP6	4	-	109697621	109697748	109694580	109694700	109698299	109698342	133964	2,6,4	0,0,0	3,2,1	0,3,4	266	139	2.00855e-06	0.000306801	1.0,1.0,1.0	1.0,0.258,0.116	0.542	54.2
78123	ENSG00000164889	SLC4A2	7	+	151074006	151074099	151071941	151072136	151074674	151074841	78123	1,4,2	0,0,0	0,4,2	2,0,2	232	139	0.00144342	0.0422528	1.0,1.0,1.0	0.0,1.0,0.375	0.542	54.2
108522	ENSG00000188917	TRMT2B	X	-	101051250	101051366	101041316	101041371	101051643	101051733	108522	13,8,4	2,7,8	4,7,2	0,0,0	255	139	5.09954e-09	2.13086e-06	0.78,0.384,0.214	1.0,1.0,1.0	-0.541	54.1
119001	ENSG00000072135	PTPN18	2	+	130370874	130370964	130370556	130370623	130372256	130372483	119001	8,1,1	0,0,0	5,0,2	0,3,2	229	139	0.000131494	0.00754601	1.0,1.0,1.0	1.0,0.0,0.378	0.541	54.1
62818	ENSG00000188566	NDOR1	9	+	137213942	137214068	137213779	137213878	137214369	137214444	62818	2,2,1	5,0,2	2,4,1	0,0,0	265	139	6.00576e-06	0.000732257	0.173,1.0,0.208	1.0,1.0,1.0	-0.54	54
58972	ENSG00000127720	METTL25	12	+	82369386	82369560	82358528	82358916	82386802	82386967	58972	1,5,9	0,0,0	1,7,5	4,1,2	313	139	2.04237e-07	4.86017e-05	1.0,1.0,1.0	0.1,0.757,0.526	0.539	53.9
143261	ENSG00000224186	C5orf66	5	+	135074416	135074528	135052453	135052522	135174041	135174172	143261	3,4,2	1,1,0	8,1,4	8,4,8	251	139	0.000111792	0.00668945	0.624,0.689,1.0	0.356,0.122,0.217	0.539	53.9
37767	ENSG00000129925	TMEM8A	16	-	372614	372748	370772	372283	374004	374151	37767	8,12,0	5,11,2	1,6,4	0,1,1	273	139	0.000236491	0.0116141	0.449,0.357,0.0	1.0,0.753,0.671	-0.539	53.9
13131	ENSG00000182986	ZNF320	19	-	52893778	52893856	52890240	52890328	52897519	52897649	13131	4,5,13	0,0,0	3,0,3	3,2,0	217	139	0.000347063	0.0153724	1.0,1.0,1.0	0.39,0.0,1.0	0.537	53.7
123372	ENSG00000132423	COQ3	6	-	99380286	99380341	99377385	99377485	99394073	99394204	123372	4,2,2	1,1,0	3,1,1	3,4,4	194	139	3.91087e-05	0.00304729	0.741,0.589,1.0	0.417,0.152,0.152	0.536	53.6
120086	ENSG00000250802	ZBED3-AS1	5	+	77100325	77100391	77098654	77098747	77118319	77118456	120086	1,2,0	9,5,4	2,4,4	0,6,2	205	139	0.00051579	0.0203847	0.07,0.213,0.0	1.0,0.311,0.576	-0.535	53.5
3973	ENSG00000254518	RP11-347H15.4	11	+	50303138	50303262	50298617	50298917	50304580	50304656	3973	2,1,4	1,5,2	5,5,2	0,1,0	263	139	2.23697e-06	0.000335048	0.514,0.096,0.514	1.0,0.725,1.0	-0.534	53.4
20556	ENSG00000096070	BRPF3	6	+	36225270	36225364	36217916	36218010	36230425	36232590	20556	0,1,0	1,2,2	5,4,1	2,0,2	233	139	1.17389e-05	0.00122008	0.0,0.23,0.0	0.599,1.0,0.23	-0.533	53.3
37260	ENSG00000241058	NSUN6	10	-	18658218	18658497	18654863	18655175	18659192	18659238	37260	9,4,6	2,3,2	2,5,2	0,0,0	418	139	7.2045e-08	2.0653e-05	0.599,0.307,0.499	1.0,1.0,1.0	-0.532	53.2
104211	ENSG00000236438	FAM157A	3	+	198162331	198162432	198157122	198157669	198167675	198167871	104211	0,1,0	3,13,3	4,3,0	0,1,2	240	139	0.000343927	0.0152607	0.0,0.043,0.0	1.0,0.635,0.0	-0.531	53.1
143706	ENSG00000149187	CELF1	11	-	47506857	47506897	47500860	47500932	47565273	47565520	143706	4,12,6	3,1,0	0,1,4	3,1,5	179	139	0.000411818	0.0173166	0.509,0.903,1.0	0.0,0.437,0.383	0.531	53.1
83360	ENSG00000259426	RP11-253M7.1	15	-	69400972	69401027	69396903	69397748	69414151	69415029	83360	2,2,3	0,1,0	0,2,0	1,0,3	194	139	5.37749e-05	0.00383604	1.0,0.589,1.0	0.0,1.0,0.0	0.53	53
142482	ENSG00000132676	DAP3	1	+	155727607	155727738	155721516	155721618	155731355	155731415	142482	3,4,2	0,4,1	0,0,2	1,4,3	270	139	0.000188282	0.00982599	1.0,0.34,0.507	0.0,0.0,0.256	0.53	53
99629	ENSG00000113712	CSNK1A1	5	-	149504680	149504735	149501014	149501222	149505482	149505595	99629	2,2,4	1,3,0	0,2,0	1,3,1	194	139	0.000298537	0.0137672	0.589,0.323,1.0	0.0,0.323,0.0	0.53	53
139810	ENSG00000160172	FAM86C2P	11	-	67799373	67799518	67798007	67798141	67803001	67803064	139810	2,13,11	1,0,1	6,4,0	4,4,2	284	139	9.66454e-06	0.00105895	0.495,1.0,0.843	0.423,0.329,0.0	0.529	52.9
120200	ENSG00000233452	STXBP5-AS1	6	-	147154493	147154665	147074804	147074847	147173592	147173647	120200	3,2,6	0,7,2	0,1,0	4,4,1	311	139	5.27052e-05	0.00377502	1.0,0.113,0.573	0.0,0.101,0.0	0.528	52.8
71962	ENSG00000122085	MTERF4	2	-	241090261	241090449	241089979	241090044	241091894	241091992	71962	4,3,4	0,3,2	0,0,2	1,2,4	327	139	0.000160344	0.00872245	1.0,0.298,0.46	0.0,0.0,0.175	0.528	52.8
36362	ENSG00000162910	MRPL55	1	-	228108436	228108474	228107666	228107869	228109148	228109306	36362	4,0,0	2,1,8	12,3,2	0,10,0	177	139	0.000892796	0.0302341	0.611,0.0,0.0	1.0,0.191,1.0	-0.527	52.7
124348	ENSG00000185267	CDNF	10	-	14836814	14836920	14836250	14836294	14837831	14838072	124348	2,1,1	7,10,10	3,6,3	7,0,1	245	139	0.000318105	0.0144267	0.139,0.054,0.054	0.196,1.0,0.63	-0.526	52.6
132845	ENSG00000248498	ASNSP1	8	-	46592057	46592209	46579212	46579551	46593463	46593631	132845	27,17,24	16,6,4	0,3,3	7,15,13	291	139	4.48143e-10	2.56936e-07	0.446,0.575,0.741	0.0,0.087,0.099	0.525	52.5
85624	ENSG00000254995	STX16-NPEPL1	20	+	58691033	58691227	58673630	58673711	58691404	58691562	85624	4,5,6	3,2,2	2,8,2	0,0,0	333	139	1.01565e-07	2.71576e-05	0.358,0.511,0.556	1.0,1.0,1.0	-0.525	52.5
11614	ENSG00000166762	CATSPER2	15	-	43649726	43649879	43647916	43648063	43664417	43664543	11614	10,3,3	7,3,6	5,4,11	0,1,1	292	139	4.89592e-06	0.000622171	0.405,0.323,0.192	1.0,0.656,0.84	-0.525	52.5
133266	ENSG00000238035	AC138035.2	5	+	181316344	181316486	181315855	181315953	181317330	181317395	133266	3,0,0	2,4,2	4,1,0	0,0,1	281	139	0.00028249	0.0132186	0.426,0.0,0.0	1.0,1.0,0.0	-0.525	52.5
66536	ENSG00000013306	SLC25A39	17	-	44324129	44324199	44323477	44323577	44324298	44324770	66536	4,2,2	0,1,0	0,0,1	6,3,0	209	139	2.3604e-08	7.80052e-06	1.0,0.571,1.0	0.0,0.0,1.0	0.524	52.4
135487	ENSG00000263072	ZNF213-AS1	16	-	3132849	3133069	3129247	3129653	3134629	3134873	135487	22,17,13	1,0,0	1,2,5	8,0,5	359	139	7.33033e-07	0.000137952	0.895,1.0,1.0	0.046,1.0,0.279	0.523	52.3
95419	ENSG00000234684	SDCBP2-AS1	20	+	1350334	1350481	1325420	1325529	1359698	1359820	95419	0,2,8	1,6,0	7,5,10	0,1,0	286	139	0.000579912	0.0221862	0.0,0.139,1.0	1.0,0.708,1.0	-0.523	52.3
80096	ENSG00000062485	CS	12	-	56298916	56299034	56298608	56298691	56299827	56299974	80096	0,0,0	4,6,4	4,5,6	5,0,9	257	139	5.4363e-07	0.000107219	0.0,0.0,0.0	0.302,1.0,0.265	-0.522	52.2
127584	ENSG00000166321	NUDT13	10	+	73125397	73125509	73125117	73125243	73126672	73126827	127584	4,8,5	0,0,0	5,4,8	2,2,9	251	139	1.93595e-10	1.22379e-07	1.0,1.0,1.0	0.581,0.526,0.33	0.521	52.1
105018	ENSG00000077458	FAM76B	11	-	95788868	95788992	95788498	95788563	95789682	95789816	105018	5,7,3	3,0,2	2,0,0	2,1,10	263	139	7.12193e-06	0.0008409	0.468,1.0,0.442	0.346,0.0,0.0	0.521	52.1
120240	ENSG00000198901	PRC1	15	-	90969078	90969117	90966464	90966648	90969446	90969623	120240	0,1,1	1,3,1	1,1,4	3,0,0	178	139	8.30257e-05	0.00533316	0.0,0.207,0.438	0.207,1.0,1.0	-0.521	52.1
104953	ENSG00000172890	NADSYN1	11	+	71460040	71460213	71458427	71458544	71460721	71460947	104953	6,1,0	1,2,3	7,2,4	0,1,0	312	139	4.78993e-06	0.000611721	0.728,0.182,0.0	1.0,0.471,1.0	-0.52	52
83949	ENSG00000136932	TRMO	9	-	97910917	97911070	97910167	97910616	97912872	97912975	83949	14,24,13	5,11,3	0,4,0	3,8,1	292	139	1.69287e-05	0.00161182	0.571,0.509,0.673	0.0,0.192,0.0	0.52	52
117012	ENSG00000230798	FOXD3-AS1	1	-	63322315	63322535	63321362	63321463	63323047	63323160	117012	6,3,3	2,2,1	6,2,2	0,0,0	359	139	8.21403e-05	0.0052956	0.537,0.367,0.537	1.0,1.0,1.0	-0.52	52
39240	ENSG00000223891	OSER1-AS1	20	+	44217366	44217682	44214887	44215003	44224820	44224978	39240	6,9,4	4,2,1	1,1,5	0,0,0	455	139	5.07736e-08	1.51911e-05	0.314,0.579,0.55	1.0,1.0,1.0	-0.519	51.9
57692	ENSG00000121310	ECHDC2	1	-	52911565	52911788	52899173	52899224	52921552	52921774	57692	6,7,4	1,0,0	8,6,0	2,2,2	362	139	2.10841e-06	0.000320071	0.697,1.0,1.0	0.606,0.535,0.0	0.519	51.9
104205	ENSG00000236438	FAM157A	3	+	198162331	198162436	198157122	198157669	198167675	198167871	104205	0,1,1	3,13,3	8,2,1	0,1,2	244	139	1.00111e-05	0.00108665	0.0,0.042,0.16	1.0,0.533,0.222	-0.518	51.8
99245	ENSG00000228436	RP5-864K19.4	1	+	38913539	38913628	38859999	38860239	38919173	38919396	99245	5,4,1	3,1,2	4,3,3	0,0,0	228	139	1.09851e-05	0.00116232	0.504,0.709,0.234	1.0,1.0,1.0	-0.518	51.8
108520	ENSG00000188917	TRMT2B	X	-	101042197	101042312	101041316	101041371	101051643	101051733	108520	7,10,8	2,7,8	7,12,12	0,0,0	254	139	1.9129e-10	1.21545e-07	0.657,0.439,0.354	1.0,1.0,1.0	-0.517	51.7
57534	ENSG00000214595	EML6	2	+	54966722	54966880	54964570	54964733	54966999	54967231	57534	5,0,7	0,2,4	2,8,4	0,0,0	297	139	0.000161286	0.00874672	1.0,0.0,0.45	1.0,1.0,1.0	-0.517	51.7
10589	ENSG00000106290	TAF6	7	-	100115845	100115943	100114228	100114268	100118395	100118649	10589	2,5,3	0,5,3	0,1,1	2,5,6	237	139	0.000154626	0.00849463	1.0,0.37,0.37	0.0,0.105,0.089	0.515	51.5
1184	ENSG00000233392	AC104809.4	2	-	240964399	240964571	240963263	240963746	240967326	240967451	1184	16,7,8	2,0,8	4,5,8	13,7,16	311	139	0.000794635	0.0278749	0.781,1.0,0.309	0.121,0.242,0.183	0.515	51.5
46265	ENSG00000259024	TVP23C-CDRT4	17	-	15506797	15506986	15503097	15503232	15516418	15516659	46265	11,10,6	1,0,1	0,6,0	2,0,2	328	139	2.79748e-05	0.00237491	0.823,1.0,0.718	0.0,1.0,0.0	0.514	51.4
135467	ENSG00000184319	RPL23AP82	22	+	50784624	50784686	50783253	50783294	50785172	50785293	135467	1,2,4	0,5,0	0,3,0	4,1,5	201	139	0.00127828	0.0387841	1.0,0.217,1.0	0.0,0.675,0.0	0.514	51.4
145527	ENSG00000196923	PDLIM7	5	-	177491806	177491995	177491403	177491420	177492404	177492435	145527	7,3,7	2,2,0	2,6,1	6,7,7	328	139	0.000904424	0.0304367	0.597,0.389,1.0	0.124,0.266,0.057	0.513	51.3
82151	ENSG00000158552	ZFAND2B	2	+	219207588	219207774	219207262	219207421	219207886	219208003	82151	3,6,1	0,5,3	4,3,5	0,0,0	325	139	1.48027e-06	0.000242001	1.0,0.339,0.125	1.0,1.0,1.0	-0.512	51.2
49567	ENSG00000132849	INADL	1	+	61991044	61991270	61990167	61990364	61991481	61991779	49567	3,2,2	1,0,0	1,0,0	0,3,3	365	139	1.61926e-07	4.02129e-05	0.533,1.0,1.0	1.0,0.0,0.0	0.511	51.1
90160	ENSG00000186010	NDUFA13	19	+	19526024	19526256	19515735	19516332	19527280	19527431	90160	12,21,12	1,8,1	0,5,4	4,9,2	371	139	0.000225284	0.0112112	0.818,0.496,0.818	0.0,0.172,0.428	0.511	51.1
135428	ENSG00000188342	GTF2F2	13	+	45149781	45149788	45136732	45136806	45151686	45151831	135428	1,0,1	8,4,3	2,5,2	3,0,2	146	139	1.82289e-05	0.00170876	0.106,0.0,0.241	0.388,1.0,0.488	-0.51	51
48583	ENSG00000175063	UBE2C	20	+	45815389	45815540	45813436	45813464	45815853	45815913	48583	3,7,3	0,2,1	3,4,4	7,4,8	290	139	0.000890278	0.0301737	1.0,0.627,0.59	0.17,0.324,0.193	0.51	51
69440	ENSG00000253540	FAM86HP	3	-	130105529	130105631	130104165	130104297	130111278	130111433	69440	15,9,10	1,0,2	10,7,0	5,3,1	241	139	0.00151982	0.0437515	0.896,1.0,0.743	0.536,0.574,0.0	0.51	51
108765	ENSG00000197302	ZNF720	16	+	31722625	31722752	31713244	31713448	31753765	31753900	108765	15,13,11	0,2,1	5,6,8	5,6,6	266	139	6.83451e-07	0.000129611	1.0,0.773,0.852	0.343,0.343,0.411	0.509	50.9
68629	ENSG00000173442	EHBP1L1	11	+	65581210	65581326	65580927	65581122	65584240	65584398	68629	4,9,1	4,0,4	8,3,4	0,0,0	255	139	3.89144e-06	0.000516347	0.353,1.0,0.12	1.0,1.0,1.0	-0.509	50.9
91395	ENSG00000197969	VPS13A	9	+	77391143	77391233	77390045	77390142	77403235	77403321	91395	0,0,0	12,10,3	2,2,2	2,7,0	229	139	0.0011906	0.0367455	0.0,0.0,0.0	0.378,0.148,1.0	-0.509	50.9
11489	ENSG00000129566	TEP1	14	-	20372732	20372798	20371488	20371632	20373010	20373147	11489	8,9,2	1,0,0	1,8,2	3,2,2	205	139	2.8156e-06	0.000397629	0.844,1.0,1.0	0.184,0.731,0.404	0.508	50.8
62011	ENSG00000166323	C11orf65	11	-	108406762	108406963	108393312	108393378	108461478	108461568	62011	21,24,33	4,1,2	15,6,2	7,5,5	340	139	1.86411e-05	0.00173422	0.682,0.908,0.871	0.467,0.329,0.141	0.508	50.8
25212	ENSG00000089682	RBM41	X	-	107070212	107070425	107069254	107069402	107088734	107088839	25212	8,9,8	3,0,3	1,2,0	6,1,2	352	139	5.25178e-05	0.00376831	0.513,1.0,0.513	0.062,0.441,0.0	0.508	50.8
71930	ENSG00000166471	TMEM41B	11	-	9295290	9295387	9287701	9287806	9314320	9314567	71930	1,1,2	1,5,0	1,1,4	0,0,0	236	139	0.000194288	0.0100332	0.371,0.105,1.0	1.0,1.0,1.0	-0.508	50.8
59723	ENSG00000182796	TMEM198B	12	+	55835463	55835615	55833446	55833541	55836125	55836246	59723	7,12,4	0,1,0	3,6,6	3,2,4	291	139	1.17425e-06	0.000200757	1.0,0.851,1.0	0.323,0.589,0.417	0.507	50.7
118226	ENSG00000168070	C11orf85	11	-	64954695	64954802	64947373	64947465	64971876	64972085	118226	7,8,5	1,5,0	0,3,1	3,1,4	246	139	0.00151055	0.0435436	0.798,0.475,1.0	0.0,0.629,0.124	0.507	50.7
5316	ENSG00000127952	STYXL1	7	-	76033635	76033706	76030420	76030527	76047661	76047963	5316	0,1,0	15,14,13	2,9,2	2,0,7	210	139	1.20158e-06	0.000204297	0.0,0.045,0.0	0.398,1.0,0.159	-0.504	50.4
12579	ENSG00000131368	MRPS25	3	-	15053375	15053521	15052410	15052633	15059368	15059475	12579	2,1,6	3,0,2	0,0,1	3,4,1	285	139	0.000244696	0.0119363	0.245,1.0,0.594	0.0,0.0,0.328	0.504	50.4
116220	ENSG00000111237	VPS29	12	-	110499456	110499546	110496011	110496094	110502048	110502111	116220	12,4,1	0,0,0	4,6,1	5,1,1	229	139	1.77207e-06	0.000278975	1.0,1.0,1.0	0.327,0.785,0.378	0.503	50.3
83695	ENSG00000119844	AFTPH	2	+	64579485	64581273	64572926	64573068	64585421	64585545	83695	107,117,72	5,6,12	41,68,40	0,0,0	1927	139	3.23892e-09	1.45922e-06	0.607,0.584,0.302	1.0,1.0,1.0	-0.502	50.2
51225	ENSG00000081870	HSPB11	1	-	53930038	53930137	53923906	53923947	53939984	53940097	51225	2,1,3	1,0,0	1,1,4	1,2,3	238	139	2.83062e-05	0.00239809	0.539,1.0,1.0	0.369,0.226,0.438	0.502	50.2
123901	ENSG00000100387	RBX1	22	+	40964037	40964234	40953463	40953633	40967798	40967888	123901	14,3,7	0,1,0	6,2,6	3,3,4	336	139	1.14077e-06	0.000196324	1.0,0.554,1.0	0.453,0.216,0.383	0.501	50.1
122295	ENSG00000136280	CCM2	7	+	45068442	45068579	45038252	45038426	45072725	45073288	122295	0,0,2	5,4,2	3,1,2	0,1,1	276	139	1.94598e-05	0.00178831	0.0,0.0,0.335	1.0,0.335,0.502	-0.501	50.1
138907	ENSG00000104529	EEF1D	8	-	143586218	143586316	143581078	143581154	143586728	143586849	138907	1,5,0	0,0,1	1,1,0	1,4,1	237	139	3.48652e-05	0.00279073	1.0,1.0,0.0	0.37,0.128,0.0	0.501	50.1
57019	ENSG00000221994	ZNF630	X	-	47988523	47988659	47983355	47983411	48002594	48002653	57019	5,6,2	2,7,6	4,2,3	0,1,0	275	139	7.59832e-06	0.000882773	0.558,0.302,0.144	1.0,0.503,1.0	-0.5	50
143601	ENSG00000143224	PPOX	1	+	161167994	161168127	161167099	161167234	161168992	161169183	143601	9,6,8	2,0,1	0,12,0	1,0,7	272	139	0.0011509	0.0359614	0.697,1.0,0.803	0.0,1.0,0.0	0.5	50
23854	ENSG00000173960	UBXN2A	2	+	23939539	23939676	23927311	23927615	23958300	23958355	23854	0,2,7	9,1,0	4,4,1	0,0,0	276	139	4.06082e-05	0.00312463	0.0,0.502,1.0	1.0,1.0,1.0	-0.499	49.9
35839	ENSG00000111271	ACAD10	12	+	111712099	111712193	111710278	111710437	111712497	111712657	35839	1,4,2	4,0,2	3,1,2	0,0,0	233	139	4.89743e-05	0.00359127	0.13,1.0,0.374	1.0,1.0,1.0	-0.499	49.9
15523	ENSG00000115525	ST3GAL5	2	-	85852859	85853000	85848020	85848084	85861180	85861292	15523	1,4,1	0,2,0	0,1,0	1,0,1	280	139	0.000253831	0.0122462	1.0,0.498,1.0	0.0,1.0,0.0	0.499	49.9
77491	ENSG00000106772	PRUNE2	9	-	76619339	76619387	76611480	76614600	76625022	76625058	77491	1,3,3	2,2,3	2,1,7	0,0,2	187	139	0.000290215	0.0134793	0.271,0.527,0.426	1.0,1.0,0.722	-0.499	49.9
127585	ENSG00000166321	NUDT13	10	+	73125397	73125509	73125117	73125243	73126634	73126827	127585	1,11,5	5,3,1	3,3,5	0,0,0	251	139	1.9107e-07	4.60914e-05	0.1,0.67,0.735	1.0,1.0,1.0	-0.498	49.8
97493	ENSG00000168528	SERINC2	1	+	31415872	31415907	31414908	31414974	31423692	31423854	97493	6,4,1	2,3,2	7,2,1	0,0,0	174	139	1.74418e-06	0.000275641	0.706,0.516,0.285	1.0,1.0,1.0	-0.498	49.8
90736	ENSG00000273184	RP11-212P7.3	7	+	128488144	128488161	128480646	128480696	128493803	128493859	90736	3,2,1	1,4,1	2,3,3	0,0,0	156	139	1.65542e-05	0.00158677	0.728,0.308,0.471	1.0,1.0,1.0	-0.498	49.8
49247	ENSG00000155621	C9orf85	9	+	71941804	71941934	71918424	71918555	71947005	71947112	49247	5,3,4	1,1,1	0,0,2	1,2,1	269	139	7.4148e-05	0.00490344	0.721,0.608,0.674	0.0,0.0,0.508	0.498	49.8
119010	ENSG00000072135	PTPN18	2	+	130370746	130370964	130370556	130370623	130372256	130372483	119010	9,6,1	0,0,0	5,4,1	0,3,2	357	139	0.00016325	0.00882336	1.0,1.0,1.0	1.0,0.342,0.163	0.498	49.8
108484	ENSG00000255036	RP11-23J9.4	9	+	97291370	97291487	97290853	97290902	97307735	97307806	108484	6,5,1	0,0,0	1,1,1	1,3,0	256	139	0.000444953	0.0182881	1.0,1.0,1.0	0.352,0.153,1.0	0.498	49.8
143270	ENSG00000224186	C5orf66	5	+	135328709	135328825	135174041	135174172	135337930	135338013	143270	3,4,3	3,10,4	7,9,12	0,6,1	255	139	0.000483917	0.0194747	0.353,0.179,0.29	1.0,0.45,0.867	-0.498	49.8
19937	ENSG00000044115	CTNNA1	5	+	138778017	138778167	138753096	138753171	138781922	138782029	19937	2,2,6	0,1,0	0,0,6	5,1,0	289	139	3.09913e-05	0.00257253	1.0,0.49,1.0	0.0,0.0,1.0	0.497	49.7
101836	ENSG00000166801	FAM111A	11	+	59144743	59144896	59143082	59143304	59148835	59148953	101836	6,21,12	1,2,1	1,8,1	2,2,5	292	139	0.000277354	0.0130441	0.741,0.833,0.851	0.192,0.656,0.087	0.497	49.7
143720	ENSG00000149187	CELF1	11	-	47536619	47536730	47500860	47500932	47565273	47565569	143720	13,8,2	3,1,0	1,3,3	3,1,5	250	139	0.00147072	0.0427775	0.707,0.816,1.0	0.156,0.625,0.25	0.497	49.7
9111	ENSG00000122008	POLK	5	+	75590352	75590440	75587025	75587058	75596221	75597178	9111	1,2,1	1,2,4	2,2,1	0,0,1	227	139	1.27216e-05	0.0012896	0.38,0.38,0.133	1.0,1.0,0.38	-0.496	49.6
17824	ENSG00000153140	CETN3	5	-	90396492	90396527	90393709	90394107	90399471	90399549	17824	4,2,6	1,0,3	1,1,0	1,1,4	174	139	4.7198e-05	0.00349847	0.762,1.0,0.615	0.444,0.444,0.0	0.496	49.6
32160	ENSG00000175471	MCTP1	5	-	94917895	94917973	94912805	94912976	94923961	94924021	32160	2,3,3	0,0,0	2,5,3	3,0,7	217	139	2.58161e-06	0.000372196	1.0,1.0,1.0	0.299,1.0,0.215	0.495	49.5
32127	ENSG00000196678	ERI2	16	-	20792557	20792704	20790777	20790932	20799262	20799351	32127	5,1,3	2,0,0	2,2,1	1,3,1	286	139	0.000557581	0.0215764	0.549,1.0,1.0	0.493,0.245,0.327	0.495	49.5
127497	ENSG00000166128	RAB8B	15	+	63223847	63223979	63223041	63223073	63244755	63244816	127497	6,4,2	2,5,2	1,5,4	0,1,0	271	139	1.1382e-05	0.00119103	0.606,0.291,0.339	1.0,0.719,1.0	-0.494	49.4
132858	ENSG00000248498	ASNSP1	8	-	46591336	46591508	46579212	46579551	46593454	46593586	132858	12,19,13	3,3,1	2,3,2	2,5,3	311	139	6.57506e-05	0.0044618	0.641,0.739,0.853	0.309,0.211,0.23	0.494	49.4
10845	ENSG00000251595	ABCA11P	4	-	435769	435879	425434	426973	437445	437511	10845	13,8,17	1,0,0	10,5,11	6,4,6	249	139	7.68108e-09	2.95882e-06	0.879,1.0,1.0	0.482,0.411,0.506	0.493	49.3
100358	ENSG00000243660	ZNF487	10	+	43476047	43476202	43475720	43475847	43481428	43483179	100358	2,5,4	0,0,0	2,3,1	0,2,4	294	139	1.65291e-05	0.00158677	1.0,1.0,1.0	1.0,0.415,0.106	0.493	49.3
6064	ENSG00000025423	HSD17B6	12	+	56763197	56763422	56752452	56752581	56773833	56774165	6064	9,11,2	0,2,0	5,5,3	3,5,1	364	139	4.21953e-05	0.0032246	1.0,0.677,1.0	0.389,0.276,0.534	0.493	49.3
133263	ENSG00000238035	AC138035.2	5	+	181316370	181316486	181315855	181315953	181317330	181317395	133263	4,0,0	2,4,2	2,1,0	0,0,1	255	139	0.00143286	0.0420634	0.522,0.0,0.0	1.0,1.0,0.0	-0.493	49.3
53494	ENSG00000118900	UBN1	16	+	4861058	4861198	4860663	4860953	4868832	4868903	53494	1,6,2	5,2,2	4,7,2	0,0,1	279	139	4.65103e-06	0.000598518	0.091,0.599,0.333	1.0,1.0,0.499	-0.492	49.2
81448	ENSG00000196873	CBWD3	9	+	68274881	68274938	68268933	68268978	68285988	68286040	81448	0,7,3	2,3,1	8,12,5	0,0,1	196	139	8.24672e-05	0.00531101	0.0,0.623,0.68	1.0,1.0,0.78	-0.492	49.2
110080	ENSG00000155957	TMBIM4	12	-	66138719	66138734	66137833	66138166	66145840	66145958	110080	2,2,1	0,0,1	0,1,0	1,0,3	154	139	8.33658e-06	0.000945377	1.0,1.0,0.474	0.0,1.0,0.0	0.491	49.1
91363	ENSG00000197601	FAR1	11	+	13714975	13715132	13712965	13713033	13721729	13721859	91363	3,7,2	1,2,2	1,1,3	0,0,0	296	139	0.000232313	0.0114638	0.585,0.622,0.32	1.0,1.0,1.0	-0.491	49.1
145175	ENSG00000247877	CTD-2001C12.1	5	-	100457056	100457124	100450934	100451097	100518529	100518611	145175	3,0,0	9,1,1	2,7,1	2,0,2	207	139	0.00164448	0.046228	0.183,0.0,0.0	0.402,1.0,0.251	-0.49	49
87885	ENSG00000157349	DDX19B	16	+	70289887	70290008	70289662	70289705	70314901	70314955	87885	2,1,5	0,0,0	2,3,5	1,2,2	260	139	5.53447e-05	0.00391954	1.0,1.0,1.0	0.517,0.445,0.572	0.489	48.9
50076	ENSG00000184517	ZFP1	16	+	75148900	75149079	75148509	75148662	75152908	75152966	50076	4,4,3	2,0,0	12,0,0	0,10,2	318	139	0.000158576	0.00863392	0.466,1.0,1.0	1.0,0.0,0.0	0.489	48.9
15878	ENSG00000112659	CUL9	6	+	43213702	43213852	43213437	43213567	43215193	43215326	15878	9,6,6	0,3,0	1,3,1	4,1,1	289	139	0.000570921	0.0219316	1.0,0.49,1.0	0.107,0.591,0.325	0.489	48.9
91626	ENSG00000160200	CBS	21	-	43068271	43068291	43066242	43066377	43068508	43068615	91626	0,0,0	2,2,4	3,0,2	0,1,2	159	139	0.000704007	0.0255538	0.0,0.0,0.0	1.0,0.0,0.466	-0.489	48.9
24213	ENSG00000204839	MROH6	8	-	143567397	143567465	143566210	143566517	143567610	143567676	24213	11,10,5	0,2,0	2,3,5	4,5,1	207	139	1.51954e-05	0.0014772	1.0,0.771,1.0	0.251,0.287,0.771	0.487	48.7
68884	ENSG00000072210	ALDH3A2	17	+	19652546	19652632	19648777	19649124	19661126	19661268	68884	0,6,7	3,4,1	5,6,2	1,0,0	225	139	1.75726e-05	0.00166241	0.0,0.481,0.812	0.755,1.0,1.0	-0.487	48.7
86244	ENSG00000111364	DDX55	12	+	123605864	123605981	123602127	123602256	123607431	123607523	86244	0,1,0	2,1,2	0,8,1	1,1,0	256	139	0.00030365	0.0139301	0.0,0.352,0.0	0.0,0.813,1.0	-0.487	48.7
54205	ENSG00000139218	SCAF11	12	-	45990705	45990820	45975543	45975734	45991884	45992120	54205	6,3,1	2,0,0	1,1,4	1,4,1	254	139	0.000405639	0.0171533	0.621,1.0,1.0	0.354,0.12,0.686	0.487	48.7
96746	ENSG00000140632	GLYR1	16	-	4813821	4813955	4812085	4812248	4814536	4814629	96746	5,2,4	6,3,0	0,0,1	6,3,5	273	139	2.10597e-05	0.00189903	0.298,0.253,1.0	0.0,0.0,0.092	0.486	48.6
72554	ENSG00000163633	C4orf36	4	-	86890047	86890158	86888159	86888271	86891455	86891593	72554	2,9,1	2,4,3	2,1,2	0,0,1	250	139	6.2269e-05	0.00427378	0.357,0.556,0.156	1.0,1.0,0.527	-0.486	48.6
92031	ENSG00000126456	IRF3	19	-	49664552	49664793	49663187	49663258	49665630	49665788	92031	21,23,20	2,4,3	12,11,2	8,9,11	380	139	2.6469e-06	0.000380275	0.793,0.678,0.709	0.354,0.309,0.062	0.485	48.5
8298	ENSG00000006118	TMEM132A	11	+	60926831	60926943	60926578	60926721	60927203	60927418	8298	1,0,0	1,4,1	2,3,3	2,0,2	251	139	2.52571e-05	0.00219251	0.356,0.0,0.0	0.356,1.0,0.454	-0.485	48.5
40666	ENSG00000065882	TBC1D1	4	+	38053105	38053225	38051898	38052060	38054198	38054338	40666	4,11,12	2,0,0	6,3,0	2,2,1	259	139	0.00117542	0.0364435	0.518,1.0,1.0	0.617,0.446,0.0	0.485	48.5
6070	ENSG00000025423	HSD17B6	12	+	56763197	56763414	56752456	56752581	56773833	56774078	6070	14,15,2	0,2,0	2,8,6	3,5,1	356	139	4.0657e-05	0.00312643	1.0,0.745,1.0	0.207,0.385,0.701	0.484	48.4
127547	ENSG00000219626	FAM228B	2	+	24167626	24167683	24164197	24164335	24169355	24169496	127547	8,16,4	0,2,1	2,7,2	3,5,3	196	139	3.56796e-05	0.00284777	1.0,0.85,0.739	0.321,0.498,0.321	0.483	48.3
101326	ENSG00000228340	MIR646HG	20	+	60284476	60284593	60180834	60180913	60318920	60319007	101326	4,1,0	4,7,1	1,2,2	1,1,0	256	139	0.00171284	0.0474357	0.352,0.072,0.0	0.352,0.521,1.0	-0.483	48.3
71888	ENSG00000101363	MANBAL	20	+	37297346	37297538	37289662	37289686	37298762	37298879	71888	41,33,44	1,3,7	9,30,11	19,9,11	331	139	2.93583e-06	0.000410773	0.945,0.822,0.725	0.166,0.583,0.296	0.482	48.2
56754	ENSG00000224189	HAGLR	2	-	176179028	176179098	176177331	176177494	176188418	176188479	56754	2,4,2	2,1,1	0,2,0	3,4,5	209	139	3.05527e-05	0.0025463	0.399,0.727,0.571	0.0,0.25,0.0	0.482	48.2
28613	ENSG00000259972	AC009120.6	16	-	74331586	74331703	74306254	74306421	74332566	74332613	28613	6,4,0	2,5,2	1,5,1	0,0,1	256	139	4.65007e-05	0.00346763	0.62,0.303,0.0	1.0,1.0,0.352	-0.476	47.6
54713	ENSG00000146963	LUC7L2	7	+	139371386	139371463	139363175	139363259	139376061	139376156	54713	8,4,8	8,1,1	4,7,3	28,9,17	216	139	0.000251637	0.0121957	0.392,0.72,0.837	0.084,0.334,0.102	0.476	47.6
132839	ENSG00000248498	ASNSP1	8	-	46592102	46592209	46579212	46579551	46593463	46593631	132839	14,13,16	16,6,4	0,2,2	7,15,13	246	139	2.23416e-08	7.46336e-06	0.331,0.55,0.693	0.0,0.07,0.08	0.475	47.5
88007	ENSG00000074219	TEAD2	19	-	49348956	49349059	49348702	49348845	49355147	49355206	88007	4,6,3	3,1,3	5,1,3	0,0,0	242	139	5.78448e-07	0.000112289	0.434,0.775,0.365	1.0,1.0,1.0	-0.475	47.5
10690	ENSG00000064489	BORCS8-MEF2B	19	-	19170204	19170439	19157215	19157283	19180685	19180761	10690	2,5,2	1,0,0	0,0,2	5,1,0	374	139	1.31266e-06	0.000219353	0.426,1.0,1.0	0.0,0.0,1.0	0.475	47.5
102597	ENSG00000106682	EIF4H	7	+	74189672	74189900	74174355	74174442	74194740	74194878	102597	5,5,3	7,0,2	3,8,1	0,0,0	367	139	2.81608e-06	0.000397629	0.213,1.0,0.362	1.0,1.0,1.0	-0.475	47.5
52442	ENSG00000143190	POU2F1	1	+	167241406	167241610	167220894	167220958	167303473	167303574	52442	3,1,1	3,2,3	2,0,2	0,1,0	343	139	0.00103239	0.0332792	0.288,0.168,0.119	1.0,0.0,1.0	-0.475	47.5
96394	ENSG00000257443	RP11-150C16.1	12	+	59002753	59002870	58921398	58921472	59056005	59056108	96394	1,5,2	0,6,3	1,4,2	0,0,0	256	139	8.89895e-07	0.000159905	1.0,0.312,0.266	1.0,1.0,1.0	-0.474	47.4
124393	ENSG00000151338	MIPOL1	14	+	37212229	37212356	37207143	37207244	37219552	37219645	124393	9,11,5	0,0,2	1,8,5	2,7,2	266	139	3.67345e-05	0.00290266	1.0,1.0,0.566	0.207,0.374,0.566	0.473	47.3
50356	ENSG00000204228	HSD17B8	6	+	33205800	33205912	33205639	33205725	33206374	33206449	50356	5,0,1	2,3,0	2,2,3	0,0,0	251	139	0.000122478	0.00716388	0.581,0.0,1.0	1.0,1.0,1.0	-0.473	47.3
129	ENSG00000135749	PCNXL2	1	-	233065444	233065661	233057231	233057290	233135012	233135190	129	6,2,3	1,0,0	2,0,1	0,2,1	356	139	0.000639784	0.0237901	0.701,1.0,1.0	1.0,0.0,0.281	0.473	47.3
100636	ENSG00000108666	C17orf75	17	-	32338343	32338351	32337896	32337961	32339812	32339962	100636	1,3,5	4,3,1	1,0,0	10,6,14	147	139	1.95907e-06	0.000300733	0.191,0.486,0.825	0.086,0.0,0.0	0.472	47.2
127391	ENSG00000116014	KISS1R	19	+	919873	920106	919489	919625	920289	921015	127391	12,0,2	1,9,3	4,2,2	2,0,0	372	139	0.00132537	0.0398572	0.818,0.0,0.199	0.428,1.0,1.0	-0.47	47
123840	ENSG00000237289	CKMT1B	15	+	43594878	43595170	43594026	43594367	43595373	43595469	123840	37,22,13	31,24,10	31,28,40	0,5,10	431	139	1.68888e-05	0.00161008	0.278,0.228,0.295	1.0,0.644,0.563	-0.469	46.9
104923	ENSG00000132478	UNK	17	+	75808947	75809039	75797280	75797397	75809759	75809930	104923	4,2,2	2,2,2	4,3,4	1,0,0	231	139	2.19988e-05	0.00196502	0.546,0.376,0.376	0.706,1.0,1.0	-0.469	46.9
53330	ENSG00000114302	PRKAR2A	3	-	48751588	48751718	48747514	48747940	48756378	48756444	53330	7,2,3	2,2,1	4,6,1	0,0,0	269	139	0.000369753	0.0160262	0.644,0.341,0.608	1.0,1.0,1.0	-0.469	46.9
17481	ENSG00000149657	LSM14B	20	+	62127589	62127701	62126225	62126439	62130529	62130691	17481	2,1,2	1,1,1	0,0,0	3,2,4	251	139	0.00133968	0.0401503	0.526,0.356,0.526	0.0,0.0,0.0	0.469	46.9
129296	ENSG00000159593	NAE1	16	-	66826522	66826583	66823528	66823600	66830846	66830955	129296	5,15,1	5,3,1	8,12,2	0,0,0	200	139	3.69098e-07	7.85617e-05	0.41,0.777,0.41	1.0,1.0,1.0	-0.468	46.8
103475	ENSG00000079332	SAR1A	10	-	70162689	70162876	70161857	70161927	70170412	70170512	103475	12,17,14	3,7,1	1,3,3	2,6,4	326	139	0.000235709	0.011585	0.63,0.509,0.857	0.176,0.176,0.242	0.467	46.7
90165	ENSG00000186010	NDUFA13	19	+	19526024	19526259	19515735	19516332	19527280	19527355	90165	12,21,12	1,8,1	0,6,6	4,9,2	374	139	0.00166554	0.0465969	0.817,0.494,0.817	0.0,0.199,0.527	0.467	46.7
34582	ENSG00000164024	METAP1	4	+	99037869	99037941	99035953	99036011	99039373	99039446	34582	8,6,2	3,3,2	5,4,1	0,0,0	211	139	1.04133e-07	2.77839e-05	0.637,0.569,0.397	1.0,1.0,1.0	-0.466	46.6
13559	ENSG00000124588	NQO2	6	+	2989527	2989733	2987986	2988031	2993930	2994053	13559	9,23,7	0,0,0	5,7,4	1,2,3	345	139	6.14918e-06	0.000746055	1.0,1.0,1.0	0.668,0.585,0.349	0.466	46.6
67454	ENSG00000040531	CTNS	17	+	3647443	3647522	3637106	3637316	3654997	3655101	67454	4,1,1	0,0,0	2,3,4	2,1,2	218	139	0.000341044	0.0151932	1.0,1.0,1.0	0.389,0.657,0.56	0.465	46.5
62015	ENSG00000166323	C11orf65	11	-	108431745	108431838	108393207	108393378	108461478	108461569	62015	11,7,4	4,1,2	4,4,0	7,5,5	232	139	0.000603103	0.0227557	0.622,0.807,0.545	0.255,0.324,0.0	0.465	46.5
80619	ENSG00000153303	FRMD1	6	-	168062670	168062739	168061806	168061981	168062893	168062959	80619	4,2,2	4,1,6	6,11,2	2,1,0	208	139	0.000226956	0.0112628	0.401,0.572,0.182	0.667,0.88,1.0	-0.464	46.4
73627	ENSG00000105997	HOXA3	7	-	27126885	27127070	27122558	27122642	27140082	27140219	73627	0,0,0	2,6,1	0,8,3	4,0,2	324	139	0.000315579	0.0143446	0.0,0.0,0.0	0.0,1.0,0.392	-0.464	46.4
92351	ENSG00000004700	RECQL	12	-	21501307	21501372	21501173	21501215	21501480	21501593	92351	1,0,1	1,2,5	2,3,3	1,0,4	204	139	0.000256577	0.012316	0.405,0.0,0.12	0.577,1.0,0.338	-0.463	46.3
144008	ENSG00000169193	CCDC126	7	+	23597971	23598051	23597415	23597605	23611170	23611553	144008	10,14,5	0,3,1	5,1,6	5,8,2	219	139	0.000352299	0.0155268	1.0,0.748,0.76	0.388,0.074,0.656	0.463	46.3
81711	ENSG00000177225	PDDC1	11	-	770313	770398	767221	767373	771332	771426	81711	0,3,0	4,6,3	3,5,1	2,1,1	224	139	0.000256557	0.012316	0.0,0.237,0.0	0.482,0.756,0.383	-0.461	46.1
53987	ENSG00000131374	TBC1D5	3	-	17586352	17586557	17562018	17562142	17742480	17742612	53987	17,16,7	7,2,5	13,15,12	0,0,0	344	139	3.04025e-09	1.3789e-06	0.495,0.764,0.361	1.0,1.0,1.0	-0.46	46
21724	ENSG00000160570	DEDD2	19	-	42217607	42217829	42216679	42217045	42220073	42220140	21724	3,2,6	1,2,0	2,0,0	1,1,5	361	139	0.000151076	0.00838869	0.536,0.278,1.0	0.435,0.0,0.0	0.46	46
126887	ENSG00000141568	FOXK2	17	+	82596826	82597012	82595781	82596191	82601302	82602405	126887	6,10,6	3,22,0	2,1,1	7,4,11	325	139	0.000939659	0.0312039	0.461,0.163,1.0	0.109,0.097,0.037	0.46	46
108922	ENSG00000130255	RPL36	19	+	5684992	5685119	5684854	5684905	5690030	5690327	108922	2,5,0	2,0,2	1,5,1	0,1,0	266	139	0.00101408	0.0328434	0.343,1.0,0.0	1.0,0.723,1.0	-0.46	46
3890	ENSG00000185686	PRAME	22	-	22553027	22553055	22552808	22552951	22556811	22556930	3890	0,0,2	1,1,1	1,0,5	0,2,0	167	139	0.000584391	0.0223149	0.0,0.0,0.625	1.0,0.0,1.0	-0.458	45.8
63672	ENSG00000076554	TPD52	8	-	80119814	80119884	80053281	80053430	80171424	80171471	63672	0,0,0	5,22,9	9,6,1	3,9,1	209	139	1.03554e-09	5.36336e-07	0.0,0.0,0.0	0.666,0.307,0.399	-0.457	45.7
130238	ENSG00000129317	PUS7L	12	-	43736565	43736661	43731704	43731758	43742456	43742555	130238	2,2,2	2,0,0	1,0,0	0,2,2	235	139	4.01159e-06	0.000528692	0.372,1.0,1.0	1.0,0.0,0.0	0.457	45.7
57531	ENSG00000124570	SERPINB6	6	-	2968778	2968913	2966399	2966590	2971532	2972165	57531	5,5,2	1,0,0	1,2,7	3,4,0	274	139	4.11799e-05	0.00315882	0.717,1.0,1.0	0.145,0.202,1.0	0.457	45.7
6076	ENSG00000025423	HSD17B6	12	+	56763203	56763414	56752452	56752581	56773833	56774165	6076	8,9,1	0,2,0	2,7,6	3,5,1	350	139	0.000282744	0.0132219	1.0,0.641,1.0	0.209,0.357,0.704	0.457	45.7
105021	ENSG00000077458	FAM76B	11	-	95788868	95789026	95788498	95788563	95789682	95789816	105021	12,6,7	3,0,2	2,3,0	2,1,10	297	139	0.000375832	0.0162243	0.652,1.0,0.621	0.319,0.584,0.0	0.457	45.7
143997	ENSG00000170113	NIPA1	15	+	22819287	22819379	22814082	22814153	22820312	22820473	143997	3,2,2	7,6,0	0,0,0	4,6,5	231	139	0.00118969	0.0367349	0.205,0.167,1.0	0.0,0.0,0.0	0.457	45.7
123838	ENSG00000237289	CKMT1B	15	+	43594971	43595170	43594018	43594367	43595373	43595469	123838	47,23,17	31,24,10	38,40,51	0,5,10	338	139	3.69651e-07	7.85617e-05	0.384,0.283,0.411	1.0,0.767,0.677	-0.455	45.5
110620	ENSG00000133678	TMEM254	10	+	80081639	80081734	80079593	80079692	80081840	80082026	110620	6,13,7	5,5,9	4,3,14	1,0,0	234	139	5.17714e-07	0.000103812	0.416,0.607,0.316	0.704,1.0,1.0	-0.455	45.5
38920	ENSG00000055950	MRPL43	10	-	100987089	100987192	100983754	100983817	100987312	100987515	38920	1,0,0	0,2,1	2,3,1	2,0,0	242	139	1.18186e-05	0.00122451	1.0,0.0,0.0	0.365,1.0,1.0	-0.455	45.5
40234	ENSG00000268895	A1BG-AS1	19	+	58352940	58353044	58347752	58347844	58353713	58353857	40234	2,3,2	0,3,0	0,0,1	1,4,0	243	139	4.87511e-05	0.00357703	1.0,0.364,1.0	0.0,0.0,1.0	0.455	45.5
40232	ENSG00000268895	A1BG-AS1	19	+	58352813	58353044	58347752	58347844	58353713	58353857	40232	10,14,14	0,3,0	1,0,2	1,4,0	370	139	0.000217186	0.0108961	1.0,0.637,1.0	0.273,0.0,1.0	0.455	45.5
22146	ENSG00000135549	PKIB	6	+	122481898	122481956	122477850	122477939	122482146	122482266	22146	7,2,5	1,0,0	2,1,2	0,4,3	197	139	3.37794e-05	0.002734	0.832,1.0,1.0	1.0,0.15,0.32	0.454	45.4
65634	ENSG00000101391	CDK5RAP1	20	-	33384776	33384961	33381983	33382179	33385649	33385770	65634	1,4,3	3,0,0	2,1,0	1,1,2	324	139	0.00179219	0.049071	0.125,1.0,1.0	0.462,0.3,0.0	0.454	45.4
83900	ENSG00000166262	FAM227B	15	-	49577628	49577697	49576135	49576845	49588015	49588083	83900	3,5,4	4,5,2	3,1,4	1,0,0	208	139	1.26732e-05	0.00128788	0.334,0.401,0.572	0.667,1.0,1.0	-0.453	45.3
116782	ENSG00000265681	RPL17	18	-	49490527	49490676	49489476	49489550	49490792	49490846	116782	1,5,1	2,3,0	1,1,1	0,0,0	288	139	0.000238244	0.0116909	0.194,0.446,1.0	1.0,1.0,1.0	-0.453	45.3
12484	ENSG00000114248	LRRC31	3	-	169851618	169851781	169839178	169840313	169854812	169854980	12484	6,9,6	0,1,0	7,9,10	3,5,5	302	139	1.27966e-06	0.000215786	1.0,0.806,1.0	0.518,0.453,0.479	0.452	45.2
90624	ENSG00000225470	JPX	X	+	73994863	73994961	73944366	73944465	73999354	73999503	90624	4,0,1	2,1,5	3,2,0	0,0,1	237	139	0.000251582	0.0121957	0.54,0.0,0.105	1.0,1.0,0.0	-0.452	45.2
117312	ENSG00000213918	DNASE1	16	+	3656963	3657000	3656637	3656753	3657186	3657341	117312	3,0,3	3,2,0	5,3,2	1,0,0	176	139	0.00135318	0.0404567	0.441,0.0,1.0	0.798,1.0,1.0	-0.452	45.2
30499	ENSG00000143416	SELENBP1	1	-	151369441	151369450	151368949	151369189	151369712	151369933	30499	34,20,15	76,85,50	20,28,18	15,5,9	148	139	5.34867e-09	2.21246e-06	0.296,0.181,0.22	0.556,0.84,0.653	-0.451	45.1
6861	ENSG00000143248	RGS5	1	-	163248529	163248706	163168257	163168368	163306232	163306329	6861	8,8,4	2,2,3	1,1,3	0,0,0	316	139	6.79634e-07	0.000129285	0.638,0.638,0.37	1.0,1.0,1.0	-0.451	45.1
32722	ENSG00000173065	FAM222B	17	-	28834292	28834326	28790377	28790425	28842681	28842790	32722	1,12,4	0,0,1	6,3,2	5,1,6	173	139	1.52523e-06	0.000248363	1.0,1.0,0.763	0.491,0.707,0.211	0.451	45.1
8941	ENSG00000268230	CTD-2619J13.8	19	-	58358488	58358585	58357584	58357649	58362676	58362751	8941	10,16,5	6,2,6	1,1,1	4,7,6	236	139	1.12656e-05	0.00118487	0.495,0.825,0.329	0.128,0.078,0.089	0.451	45.1
86880	ENSG00000090097	PCBP4	3	-	51961975	51962088	51961159	51961304	51962809	51962892	86880	1,1,0	9,24,2	3,2,6	6,4,0	252	139	4.03516e-05	0.0031146	0.058,0.022,0.0	0.216,0.216,1.0	-0.451	45.1
89544	ENSG00000281566	RP11-485F13.1	X	+	98811001	98811131	98644527	98644574	98864610	98864984	89544	4,3,1	5,0,8	0,0,0	1,3,1	269	139	0.000951496	0.0314238	0.292,1.0,0.061	0.0,0.0,0.0	0.451	45.1
99475	ENSG00000132837	DMGDH	5	-	79055809	79055904	79044303	79044552	79120340	79120453	99475	2,1,1	1,0,5	2,1,1	0,0,0	234	139	0.000189801	0.00988849	0.543,1.0,0.106	1.0,1.0,1.0	-0.45	45
145116	ENSG00000160551	TAOK1	17	+	29403729	29403847	29398227	29398348	29451454	29451680	145116	0,0,1	3,4,0	1,1,1	1,0,0	257	139	0.000230052	0.0113887	0.0,0.0,1.0	0.351,1.0,1.0	-0.45	45
65827	ENSG00000147475	ERLIN2	8	+	37737330	37737570	37737007	37737114	37737907	37738029	65827	9,1,5	1,0,0	0,3,4	4,0,2	379	139	1.66702e-05	0.00159293	0.767,1.0,1.0	0.0,1.0,0.423	0.448	44.8
40021	ENSG00000180747	SMG1P3	16	-	21484509	21484535	21479544	21479578	21519827	21520444	40021	3,2,1	1,1,0	1,0,0	0,2,1	165	139	3.32804e-05	0.00269893	0.716,0.628,1.0	1.0,0.0,0.0	0.448	44.8
71370	ENSG00000132204	LINC00470	18	-	1358725	1358894	1278567	1278633	1368484	1368597	71370	7,7,9	0,1,2	1,5,1	5,1,1	308	139	0.00115896	0.0361218	1.0,0.76,0.67	0.083,0.693,0.311	0.448	44.8
60667	ENSG00000165275	TRMT10B	9	+	37762588	37762685	37761902	37762117	37768086	37768228	60667	0,1,1	1,4,0	3,2,4	2,0,0	236	139	4.4392e-05	0.00334683	0.0,0.128,1.0	0.469,1.0,1.0	-0.447	44.7
92162	ENSG00000214022	REPIN1	7	+	150369670	150369697	150368271	150368318	150371227	150371655	92162	5,4,1	1,2,2	0,2,1	3,6,4	166	139	0.000494465	0.0197894	0.807,0.626,0.295	0.0,0.218,0.173	0.446	44.6
140688	ENSG00000072310	SREBF1	17	-	17818262	17818347	17817700	17817916	17819012	17819234	140688	3,1,0	4,2,3	6,8,6	1,3,4	224	139	0.00163709	0.0461045	0.318,0.237,0.0	0.788,0.623,0.482	-0.446	44.6
20387	ENSG00000174562	KLK15	19	-	50835576	50835775	50827661	50827815	50837114	50837213	20387	2,6,14	3,1,2	2,9,1	0,0,0	338	139	3.39422e-05	0.00274177	0.215,0.712,0.742	1.0,1.0,1.0	-0.444	44.4
80722	ENSG00000118307	CASC1	12	-	25158689	25158737	25158471	25158563	25161112	25161197	80722	0,0,0	7,16,7	0,4,3	6,6,0	187	139	0.00165401	0.0463841	0.0,0.0,0.0	0.0,0.331,1.0	-0.444	44.4
143246	ENSG00000224186	C5orf66	5	+	135313473	135313662	135296494	135296589	135337930	135338013	143246	2,7,1	0,1,0	3,9,5	1,3,5	328	139	2.73986e-05	0.00233888	1.0,0.748,1.0	0.56,0.56,0.298	0.443	44.3
96741	ENSG00000140632	GLYR1	16	-	4813733	4813955	4812085	4812248	4814536	4814629	96741	30,21,18	6,3,0	7,4,9	6,3,5	361	139	0.000510546	0.0202491	0.658,0.729,1.0	0.31,0.339,0.409	0.443	44.3
126394	ENSG00000136048	DRAM1	12	+	101914173	101914232	101901290	101901433	101921215	101923623	126394	1,4,1	2,1,2	5,4,6	1,0,1	198	139	0.000567833	0.0218526	0.26,0.737,0.26	0.778,1.0,0.808	-0.443	44.3
129044	ENSG00000103202	NME4	16	+	406833	406889	406684	406777	407424	407560	129044	0,0,1	8,12,10	2,1,5	1,2,3	195	139	1.37431e-06	0.000228619	0.0,0.0,0.067	0.588,0.263,0.543	-0.442	44.2
6071	ENSG00000025423	HSD17B6	12	+	56763203	56763422	56752452	56752581	56773833	56774165	6071	3,5,1	0,2,0	5,4,3	3,5,1	358	139	0.00157236	0.0447621	1.0,0.493,1.0	0.393,0.237,0.538	0.442	44.2
56935	ENSG00000139083	ETV6	12	+	11752452	11752585	11649943	11650160	11839139	11839304	56935	4,2,5	4,2,0	1,5,1	0,0,0	272	139	8.00672e-05	0.00518364	0.338,0.338,1.0	1.0,1.0,1.0	-0.441	44.1
31878	ENSG00000215190	LINC00680	6	-	57948917	57948966	57946073	57947177	57959027	57959111	31878	1,4,4	1,0,1	1,1,0	1,1,1	188	139	0.000491261	0.0196995	0.425,1.0,0.747	0.425,0.425,0.0	0.441	44.1
17825	ENSG00000153140	CETN3	5	-	90396492	90396564	90393858	90394107	90399471	90399552	17825	5,5,5	1,0,3	1,2,0	1,1,4	211	139	0.000927887	0.0309715	0.767,1.0,0.523	0.397,0.569,0.0	0.441	44.1
122851	ENSG00000197381	ADARB1	21	+	45116932	45117038	45074568	45074793	45118563	45118619	122851	7,11,8	1,0,0	8,1,9	3,3,2	245	139	8.87924e-06	0.00099248	0.799,1.0,1.0	0.602,0.159,0.719	0.44	44
40496	ENSG00000006704	GTF2IRD1	7	+	74515344	74515568	74512829	74512971	74518138	74518322	40496	3,8,3	0,1,1	0,8,3	14,2,2	363	139	6.30068e-05	0.00431721	1.0,0.754,0.535	0.0,0.605,0.365	0.44	44
144203	ENSG00000124831	LRRFIP1	2	+	237757455	237757548	237756094	237756187	237758728	237758821	144203	2,0,0	3,3,3	1,2,4	2,2,0	232	139	0.000538262	0.0210101	0.285,0.0,0.0	0.231,0.375,1.0	-0.44	44
88684	ENSG00000100526	CDKN3	14	+	54407111	54407272	54396994	54397077	54408744	54408789	88684	4,1,4	3,3,2	2,5,7	2,0,0	300	139	0.000595203	0.0225473	0.382,0.134,0.481	0.317,1.0,1.0	-0.44	44
101443	ENSG00000156273	BACH1	21	+	29305203	29305322	29299415	29299598	29321220	29321355	101443	5,5,0	6,4,1	3,1,4	0,1,1	258	139	0.00106845	0.0341351	0.31,0.402,0.0	1.0,0.35,0.683	-0.44	44
115934	ENSG00000063978	RNF4	4	+	2470986	2471109	2469180	2469258	2497006	2497103	115934	8,6,0	2,0,1	1,2,0	2,6,1	262	139	0.00123069	0.0376715	0.68,1.0,0.0	0.21,0.15,0.0	0.44	44
73914	ENSG00000131051	RBM39	20	-	35729461	35729551	35725123	35725155	35731940	35732135	73914	4,7,2	2,3,1	6,6,4	0,0,0	229	139	8.89044e-06	0.000992662	0.548,0.586,0.548	1.0,1.0,1.0	-0.439	43.9
118957	ENSG00000116874	WARS2	1	-	119076520	119076603	119045581	119045662	119140554	119140638	118957	7,4,2	1,0,1	6,1,3	7,1,4	222	139	3.61681e-05	0.00287281	0.814,1.0,0.556	0.349,0.385,0.32	0.439	43.9
103111	ENSG00000234665	RP11-262H14.3	9	-	62866966	62867110	62859071	62859193	62869189	62869300	103111	5,10,6	4,2,2	4,6,8	0,0,0	283	139	9.38911e-08	2.55489e-05	0.38,0.711,0.596	1.0,1.0,1.0	-0.438	43.8
56269	ENSG00000011347	SYT7	11	-	61542210	61542579	61532988	61533124	61547176	61547308	56269	23,23,6	0,1,1	2,6,6	5,1,2	508	139	7.57475e-06	0.000881696	1.0,0.863,0.621	0.099,0.621,0.451	0.438	43.8
125118	ENSG00000243069	ARHGEF26-AS1	3	-	154060013	154060062	154030273	154030376	154108668	154108785	125118	1,2,3	1,0,0	0,2,6	2,12,0	188	139	8.35661e-05	0.00535949	0.425,1.0,1.0	0.0,0.11,1.0	0.438	43.8
125834	ENSG00000145012	LPP	3	+	188341662	188341719	188153941	188154021	188406111	188406313	125834	14,5,1	3,7,2	9,12,12	3,0,0	196	139	0.000437616	0.0181069	0.768,0.336,0.262	0.68,1.0,1.0	-0.438	43.8
77060	ENSG00000167525	PROCA1	17	-	28706679	28706763	28704707	28704843	28710870	28711086	77060	1,6,8	11,3,0	2,0,0	3,4,1	223	139	0.00059218	0.0224702	0.054,0.555,1.0	0.294,0.0,0.0	0.438	43.8
46928	ENSG00000111247	RAD51AP1	12	+	4545218	4545312	4543762	4543904	4545781	4545832	46928	3,4,7	5,2,3	1,0,0	7,8,5	233	139	1.65448e-07	4.08702e-05	0.264,0.544,0.582	0.079,0.0,0.0	0.437	43.7
123295	ENSG00000088305	DNMT3B	20	+	32791459	32791708	32788853	32789012	32795408	32795534	123295	14,8,6	0,0,1	6,3,1	0,3,3	388	139	2.57665e-05	0.00222576	1.0,1.0,0.682	1.0,0.264,0.107	0.437	43.7
93449	ENSG00000123329	ARHGAP9	12	-	57483894	57484037	57480777	57480834	57488611	57488814	93449	14,6,7	6,3,1	2,0,0	1,3,3	282	139	3.20169e-05	0.00262933	0.535,0.496,0.775	0.496,0.0,0.0	0.437	43.7
76620	ENSG00000178773	CPNE7	16	+	89582409	89582493	89578856	89578996	89583443	89583528	76620	4,4,5	2,1,5	0,1,1	3,3,3	223	139	4.61401e-05	0.00345067	0.555,0.714,0.384	0.0,0.172,0.172	0.436	43.6
102469	ENSG00000114796	KLHL24	3	+	183636220	183636311	183635622	183635747	183650295	183650575	102469	2,12,3	0,2,0	1,0,3	0,2,2	230	139	0.0012182	0.0374193	1.0,0.784,1.0	1.0,0.0,0.475	0.436	43.6
132466	ENSG00000187118	CMC1	3	+	28263290	28263377	28241623	28241901	28316332	28319762	132466	2,0,11	4,2,3	1,5,5	2,0,0	226	139	0.00156686	0.0446839	0.235,0.0,0.693	0.235,1.0,1.0	-0.436	43.6
893	ENSG00000197958	RPL12	9	-	127450730	127450867	127449280	127449362	127451280	127451373	893	5,9,2	0,1,0	3,2,3	0,11,2	276	139	1.7771e-05	0.00167731	1.0,0.819,1.0	1.0,0.084,0.43	0.435	43.5
90422	ENSG00000168028	RPSA	3	+	39408577	39408691	39407640	39407786	39410753	39410999	90422	8,1,1	4,18,19	6,9,6	2,5,1	253	139	0.000166493	0.00893006	0.524,0.03,0.028	0.622,0.497,0.767	-0.435	43.5
114746	ENSG00000164587	RPS14	5	-	150447673	150447734	150446801	150446963	150449702	150449747	114746	11,4,9	0,0,1	2,1,1	0,1,4	200	139	0.00145165	0.042413	1.0,1.0,0.862	1.0,0.41,0.148	0.435	43.5
71893	ENSG00000101363	MANBAL	20	+	37297295	37297538	37289662	37289686	37298762	37298879	71893	67,45,48	1,3,7	16,46,15	19,9,11	382	139	1.18432e-05	0.00122575	0.961,0.845,0.714	0.235,0.65,0.332	0.434	43.4
107888	ENSG00000144182	LIPT1	2	+	99155481	99155544	99154984	99155051	99161956	99162711	107888	3,4,5	3,4,1	1,1,0	6,3,4	202	139	2.23345e-05	0.00198781	0.408,0.408,0.775	0.103,0.187,0.0	0.434	43.4
143242	ENSG00000224186	C5orf66	5	+	135332689	135332793	135328709	135328825	135337930	135338013	143242	4,5,1	0,1,0	15,11,13	8,7,9	243	139	1.09129e-05	0.00116154	1.0,0.741,1.0	0.517,0.473,0.452	0.433	43.3
114407	ENSG00000160766	GBAP1	1	-	155224876	155225087	155218847	155218923	155227381	155227422	114407	4,4,1	0,0,0	3,3,5	2,0,4	350	139	3.43398e-05	0.00276483	1.0,1.0,1.0	0.373,1.0,0.332	0.432	43.2
29654	ENSG00000119912	IDE	10	-	92480792	92480916	92478644	92478789	92483254	92483337	29654	12,22,14	8,8,1	3,6,4	3,19,14	263	139	4.94611e-05	0.0036205	0.442,0.592,0.881	0.346,0.143,0.131	0.432	43.2
123767	ENSG00000228801	RP11-110G21.1	8	+	51913056	51913180	51899324	51899846	51946435	51946605	123767	3,3,2	0,1,2	1,2,0	3,1,5	263	139	0.00153739	0.0440844	1.0,0.613,0.346	0.15,0.514,0.0	0.432	43.2
103622	ENSG00000105677	TMEM147	19	+	35546683	35546808	35546525	35546585	35547118	35547397	103622	10,6,1	0,2,5	13,5,6	0,0,0	264	139	7.5089e-05	0.00493653	1.0,0.612,0.095	1.0,1.0,1.0	-0.431	43.1
98484	ENSG00000129158	SERGEF	11	-	17999493	17999572	17992930	17992993	18000496	18000557	98484	4,4,3	2,5,3	0,0,0	3,3,7	218	139	4.89286e-08	1.47104e-05	0.56,0.338,0.389	0.0,0.0,0.0	0.429	42.9
2036	ENSG00000275778	PRH1-PRR4	12	-	10884153	10884275	10883060	10883096	11171421	11171598	2036	7,7,6	1,4,4	2,4,1	0,0,0	261	139	4.98075e-08	1.49383e-05	0.788,0.482,0.444	1.0,1.0,1.0	-0.429	42.9
95526	ENSG00000151687	ANKAR	2	+	189711048	189711153	189706937	189707146	189719571	189719813	95526	1,5,2	4,2,0	4,1,1	0,0,0	244	139	9.97008e-05	0.00612959	0.125,0.587,1.0	1.0,1.0,1.0	-0.429	42.9
105014	ENSG00000077458	FAM76B	11	-	95788858	95789026	95788498	95788563	95789682	95789816	105014	8,7,9	3,0,2	2,3,1	2,1,10	307	139	0.00108021	0.0343979	0.547,1.0,0.671	0.312,0.576,0.043	0.429	42.9
53472	ENSG00000248092	NNT-AS1	5	-	43578384	43578579	43575777	43575935	43602777	43602937	53472	1,2,4	0,1,0	1,0,2	2,3,0	334	139	6.00316e-06	0.000732257	1.0,0.454,1.0	0.172,0.0,1.0	0.427	42.7
44169	ENSG00000115318	LOXL3	2	-	74536290	74536535	74535995	74536150	74549368	74549583	44169	7,9,11	4,2,1	2,3,3	5,7,3	384	139	0.000487546	0.0195951	0.388,0.62,0.799	0.126,0.134,0.266	0.427	42.7
75000	ENSG00000102897	LYRM1	16	+	20920121	20920210	20900234	20900535	20923999	20925006	75000	2,3,3	0,0,0	1,6,4	3,0,2	228	139	0.000896453	0.0302899	1.0,1.0,1.0	0.169,1.0,0.549	0.427	42.7
12286	ENSG00000137312	FLOT1	6	-	30741613	30741799	30740508	30740591	30742146	30742203	12286	6,6,3	1,1,3	4,1,0	3,4,6	325	139	0.00152375	0.0438365	0.72,0.72,0.3	0.363,0.097,0.0	0.427	42.7
32532	ENSG00000164855	TMEM184A	7	-	1555713	1555773	1555265	1555484	1555956	1556120	32532	3,5,2	6,13,10	8,6,5	3,3,2	199	139	9.3939e-05	0.00585123	0.259,0.212,0.123	0.651,0.583,0.636	-0.425	42.5
45670	ENSG00000076864	RAP1GAP	1	-	21597699	21597728	21596220	21597264	21597960	21598077	45670	3,8,5	3,2,4	11,8,9	0,0,0	168	139	1.0854e-07	2.85885e-05	0.453,0.768,0.508	1.0,1.0,1.0	-0.424	42.4
121413	ENSG00000148840	PPRC1	10	+	102147359	102147392	102144249	102144307	102148371	102148521	121413	14,18,13	4,3,1	8,11,10	7,13,17	172	139	2.45848e-06	0.000359879	0.739,0.829,0.913	0.48,0.406,0.322	0.424	42.4
26675	ENSG00000137210	TMEM14B	6	+	10755141	10755232	10749201	10749268	10770076	10770204	26675	9,10,8	10,6,12	16,8,13	6,0,2	230	139	0.000891626	0.0302111	0.352,0.502,0.287	0.617,1.0,0.797	-0.424	42.4
107743	ENSG00000128928	IVD	15	+	40416289	40416362	40415400	40415482	40435416	40435765	107743	4,6,4	5,2,1	7,15,22	0,0,0	212	139	1.10438e-07	2.90263e-05	0.344,0.663,0.724	1.0,1.0,1.0	-0.423	42.3
82661	ENSG00000251503	APITD1-CORT	1	+	10433843	10433992	10430803	10431401	10434656	10434690	82661	1,1,4	1,0,0	0,9,1	7,0,8	288	139	3.63018e-05	0.0028811	0.326,1.0,1.0	0.0,1.0,0.057	0.423	42.3
123906	ENSG00000075239	ACAT1	11	+	108133823	108133933	108131906	108131954	108134220	108134316	123906	8,0,4	7,9,0	0,1,0	2,4,2	249	139	0.00122361	0.03752	0.389,0.0,1.0	0.0,0.122,0.0	0.422	42.2
28880	ENSG00000163462	TRIM46	1	+	155178808	155178846	155178491	155178613	155179631	155179934	28880	17,30,18	3,10,3	12,4,4	7,6,16	177	139	0.000166551	0.00893006	0.817,0.702,0.825	0.574,0.344,0.164	0.421	42.1
132844	ENSG00000248498	ASNSP1	8	-	46592057	46592209	46579212	46579551	46593454	46593586	132844	12,5,9	3,3,1	2,0,3	2,5,3	291	139	0.000790603	0.0278126	0.656,0.443,0.811	0.323,0.0,0.323	0.421	42.1
40211	ENSG00000267002	RP11-242D8.1	17	-	43159506	43159727	43148367	43148783	43166979	43167221	40211	27,22,12	2,4,1	7,3,5	3,3,4	360	139	0.000921978	0.0308746	0.839,0.68,0.822	0.474,0.279,0.326	0.421	42.1
127320	ENSG00000137522	RNF121	11	+	71962151	71962289	71960749	71960891	71994718	71994852	127320	12,4,10	1,0,0	5,12,20	3,8,4	277	139	1.90429e-06	0.000293338	0.858,1.0,1.0	0.455,0.429,0.715	0.42	42
104676	ENSG00000138028	CGREF1	2	-	27100415	27100491	27098888	27099840	27102096	27102221	104676	11,16,20	6,7,0	10,11,6	12,15,15	215	139	0.000350155	0.015476	0.542,0.596,1.0	0.35,0.322,0.205	0.42	42
9367	ENSG00000138101	DTNB	2	-	25451550	25451635	25433909	25433995	25482795	25482873	9367	5,3,3	2,1,2	2,1,5	0,0,0	224	139	0.000613324	0.0230285	0.608,0.651,0.482	1.0,1.0,1.0	-0.42	42
90632	ENSG00000225470	JPX	X	+	73962734	73962801	73944583	73944662	73998953	73999368	90632	2,3,5	1,10,1	0,0,2	1,1,4	206	139	0.00115466	0.0360425	0.574,0.168,0.771	0.0,0.0,0.252	0.42	42
44164	ENSG00000115318	LOXL3	2	-	74536290	74536471	74535947	74536150	74549368	74549663	44164	3,6,7	4,2,1	2,3,0	5,7,3	320	139	0.00175939	0.0484095	0.246,0.566,0.753	0.148,0.157,0.0	0.42	42
112039	ENSG00000104413	ESRP1	8	+	94649537	94649639	94646216	94646335	94662500	94662555	112039	7,6,4	3,6,5	0,0,0	2,4,1	241	139	6.58149e-08	1.9134e-05	0.574,0.366,0.316	0.0,0.0,0.0	0.419	41.9
114139	ENSG00000132481	TRIM47	17	-	75876717	75876881	75876261	75876492	75877873	75878575	114139	6,8,13	4,4,1	9,20,11	0,0,0	303	139	9.91955e-08	2.66977e-05	0.408,0.478,0.856	1.0,1.0,1.0	-0.419	41.9
78666	ENSG00000176261	ZBTB8OS	1	-	32633950	32634072	32621603	32621948	32650428	32650554	78666	4,9,12	2,4,3	2,2,7	0,0,0	261	139	1.49155e-07	3.79875e-05	0.516,0.545,0.681	1.0,1.0,1.0	-0.419	41.9
55913	ENSG00000120549	KIAA1217	10	+	24494499	24494604	24473227	24474060	24495146	24495196	55913	20,42,11	5,4,7	9,9,10	18,18,12	244	139	8.3043e-06	0.000944915	0.695,0.857,0.472	0.222,0.222,0.322	0.419	41.9
144564	ENSG00000188070	C11orf95	11	-	63764503	63764598	63763302	63763869	63764867	63764919	144564	9,10,1	1,0,0	5,4,1	3,0,6	234	139	5.09045e-05	0.00369139	0.842,1.0,1.0	0.497,1.0,0.09	0.418	41.8
90155	ENSG00000186010	NDUFA13	19	+	19526188	19526250	19515754	19516332	19527280	19527355	90155	3,5,1	1,8,1	0,2,0	4,9,2	201	139	0.000223635	0.0111464	0.675,0.302,0.409	0.0,0.133,0.0	0.418	41.8
76073	ENSG00000126453	BCL2L12	19	+	49668850	49668937	49666684	49666799	49673697	49673916	76073	10,17,4	7,5,3	15,11,9	0,0,1	226	139	2.19802e-07	5.14125e-05	0.468,0.676,0.451	1.0,1.0,0.847	-0.417	41.7
99537	ENSG00000132837	DMGDH	5	-	79223807	79223926	79183810	79183870	79235810	79236005	99537	20,20,24	23,14,14	16,15,16	4,2,0	258	139	3.30612e-05	0.00268645	0.319,0.435,0.48	0.683,0.802,1.0	-0.417	41.7
94394	ENSG00000258674	CTC-260F20.3	19	+	19532308	19532465	19529363	19529517	19532631	19532740	94394	2,8,7	2,5,0	1,1,3	0,0,0	296	139	4.56221e-05	0.00342074	0.32,0.429,1.0	1.0,1.0,1.0	-0.417	41.7
96075	ENSG00000175449	RFESD	5	+	95654332	95654367	95654060	95654236	95656045	95658082	96075	6,14,5	9,18,8	12,10,8	1,3,3	174	139	5.59164e-05	0.00394542	0.347,0.383,0.333	0.906,0.727,0.681	-0.417	41.7
35844	ENSG00000111271	ACAD10	12	+	111712046	111712193	111710278	111710437	111712497	111712657	35844	4,11,3	4,0,2	3,1,2	0,0,0	286	139	0.000125355	0.00728872	0.327,1.0,0.422	1.0,1.0,1.0	-0.417	41.7
116221	ENSG00000111237	VPS29	12	-	110499456	110499546	110496045	110496187	110502048	110502111	116221	11,8,4	2,0,1	4,6,1	2,3,4	229	139	0.000804247	0.028074	0.77,1.0,0.708	0.548,0.548,0.132	0.417	41.7
1409	ENSG00000011451	WIZ	19	-	15442675	15442748	15436805	15437129	15448102	15448367	1409	7,8,3	1,1,2	6,2,6	8,4,8	212	139	0.000870744	0.0297369	0.821,0.84,0.496	0.33,0.247,0.33	0.417	41.7
25350	ENSG00000085063	CD59	11	-	33702667	33702737	33698261	33698514	33710205	33710343	25350	2,6,0	4,0,3	0,0,0	4,4,3	209	139	0.00137854	0.0409251	0.25,1.0,0.0	0.0,0.0,0.0	0.417	41.7
82763	ENSG00000160752	FDPS	1	+	155318676	155318855	155318168	155318291	155319610	155319688	82763	4,7,4	1,5,1	2,1,1	3,4,5	318	139	0.000847196	0.0291544	0.636,0.38,0.636	0.226,0.099,0.08	0.416	41.6
89111	ENSG00000099622	CIRBP	19	+	1262039	1262143	1261341	1261641	1264252	1264698	89111	16,14,6	8,2,13	13,15,5	2,0,0	243	139	1.4822e-05	0.0014489	0.534,0.8,0.209	0.788,1.0,1.0	-0.415	41.5
100900	ENSG00000114867	EIF4G1	3	+	184316135	184316218	184315762	184315856	184317716	184317816	100900	2,2,2	1,5,0	2,2,3	0,0,0	222	139	0.000495907	0.0198162	0.556,0.2,1.0	1.0,1.0,1.0	-0.415	41.5
87415	ENSG00000145736	GTF2H2	5	-	71065124	71065222	71062707	71062796	71067295	71067638	87415	12,3,11	2,3,3	3,7,0	8,6,8	237	139	0.000962117	0.0316428	0.779,0.37,0.683	0.18,0.406,0.0	0.415	41.5
2043	ENSG00000275778	PRH1-PRR4	12	-	10973654	10973721	10883060	10883096	11171421	11171598	2043	5,11,3	1,4,4	5,8,6	0,0,0	206	139	2.2706e-07	5.271e-05	0.771,0.65,0.336	1.0,1.0,1.0	-0.414	41.4
710	ENSG00000223745	RP4-717I23.3	1	-	93273473	93273628	93264637	93264772	93305387	93305470	710	2,2,4	0,3,0	1,0,0	0,2,1	294	139	6.65866e-05	0.00449503	1.0,0.24,1.0	1.0,0.0,0.0	0.413	41.3
35427	ENSG00000100412	ACO2	22	+	41507445	41507606	41502629	41502771	41507790	41508049	35427	7,1,0	1,0,6	4,3,3	0,0,0	300	139	0.000275363	0.0129901	0.764,1.0,0.0	1.0,1.0,1.0	-0.412	41.2
29145	ENSG00000197989	SNHG12	1	-	28580621	28580646	28579911	28579981	28581589	28581853	29145	5,1,3	0,5,4	0,0,2	2,2,4	164	139	0.000938727	0.0311898	1.0,0.145,0.389	0.0,0.0,0.298	0.412	41.2
11952	ENSG00000145014	TMEM44	3	-	194615568	194615697	194610915	194611020	194623223	194623310	11952	13,8,12	0,0,0	2,4,6	3,0,3	268	139	6.59134e-05	0.0044618	1.0,1.0,1.0	0.257,1.0,0.509	0.411	41.1
80090	ENSG00000062485	CS	12	-	56298916	56299038	56298608	56298691	56299827	56299974	80090	0,0,0	4,6,4	2,6,1	5,0,9	261	139	0.00102951	0.0332081	0.0,0.0,0.0	0.176,1.0,0.056	-0.411	41.1
136300	ENSG00000179262	RAD23A	19	+	12948496	12948513	12948176	12948358	12948685	12948813	136300	24,37,21	27,33,14	27,29,29	3,2,2	156	139	3.71891e-12	3.49938e-09	0.442,0.5,0.572	0.889,0.928,0.928	-0.41	41
71788	ENSG00000140740	UQCRC2	16	+	21959338	21959555	21958460	21958599	21961327	21961465	71788	3,5,6	1,4,1	10,1,2	1,0,0	356	139	4.65153e-06	0.000598518	0.539,0.328,0.701	0.796,1.0,1.0	-0.409	40.9
129644	ENSG00000080823	MOK	14	-	102251443	102251610	102250894	102250987	102251755	102251804	129644	7,16,7	1,10,9	2,0,2	8,10,7	306	139	2.5496e-05	0.00220912	0.761,0.421,0.261	0.102,0.0,0.115	0.409	40.9
37345	ENSG00000176225	RTTN	18	-	70051340	70051548	70047970	70048188	70054130	70054284	37345	18,11,3	0,0,0	2,3,3	0,1,4	347	139	0.000710232	0.0257081	1.0,1.0,1.0	1.0,0.546,0.231	0.408	40.8
133906	ENSG00000152380	FAM151B	5	+	80495052	80495283	80488123	80488148	80513603	80513661	133906	5,8,1	1,0,0	0,4,2	3,0,1	370	139	0.000736772	0.0263704	0.653,1.0,1.0	0.0,1.0,0.429	0.408	40.8
80741	ENSG00000128039	SRD5A3	4	+	55359374	55359488	55346108	55346557	55367587	55367722	80741	3,7,3	3,2,2	4,4,9	1,0,0	253	139	2.23912e-05	0.00198998	0.355,0.658,0.452	0.687,1.0,1.0	-0.407	40.7
75450	ENSG00000124155	PIGT	20	+	45418771	45418979	45416543	45416694	45419503	45419588	75450	10,10,2	2,2,1	7,4,10	0,0,0	347	139	0.00112766	0.0353969	0.667,0.667,0.445	1.0,1.0,1.0	-0.407	40.7
145336	ENSG00000206530	CFAP44	3	-	113333405	113333583	113330167	113330668	113341743	113341918	145336	8,4,4	5,1,3	6,6,4	0,0,1	317	139	9.29746e-06	0.00102694	0.412,0.637,0.369	1.0,1.0,0.637	-0.406	40.6
7332	ENSG00000225855	RUSC1-AS1	1	-	155322242	155322437	155321624	155321695	155324077	155324168	7332	16,22,20	0,0,2	2,20,13	6,3,2	334	139	3.76687e-05	0.00295564	1.0,1.0,0.806	0.122,0.735,0.73	0.406	40.6
2582	ENSG00000101294	HM13	20	+	31549028	31549114	31547381	31547606	31550063	31550121	2582	1,3,3	1,2,2	4,9,2	1,1,0	225	139	0.000627164	0.023434	0.382,0.481,0.481	0.712,0.848,1.0	-0.405	40.5
14087	ENSG00000089057	SLC23A2	20	-	4869621	4869845	4867769	4867875	4873935	4874092	14087	9,9,11	0,0,0	1,6,2	4,1,0	363	139	0.00104498	0.0335883	1.0,1.0,1.0	0.087,0.697,1.0	0.405	40.5
137473	ENSG00000233593	RP4-665J23.1	1	-	90837549	90837765	90831868	90832196	90851540	90851618	137473	12,5,2	0,4,1	4,0,2	12,4,1	355	139	0.00180941	0.0493999	1.0,0.329,0.439	0.115,0.0,0.439	0.405	40.5
9521	ENSG00000057593	F7	13	+	113110689	113110850	113105790	113105905	113113846	113113960	9521	29,30,21	3,0,0	9,3,4	1,3,2	300	139	0.000315139	0.0143397	0.817,1.0,1.0	0.807,0.317,0.481	0.404	40.4
81302	ENSG00000141380	SS18	18	-	26079010	26079146	26078075	26078160	26082362	26082528	81302	8,5,3	2,1,2	1,2,2	7,2,4	275	139	0.000562941	0.0217326	0.669,0.716,0.431	0.067,0.336,0.202	0.404	40.4
64445	ENSG00000226471	CTA-292E10.6	22	+	28844126	28844199	28821971	28822179	28846317	28846512	64445	6,7,1	0,0,0	3,3,4	1,1,3	212	139	0.000581451	0.0222382	1.0,1.0,1.0	0.663,0.663,0.466	0.403	40.3
6956	ENSG00000010626	LRRC23	12	+	6909889	6910026	6906408	6906662	6913890	6914228	6956	31,18,12	0,0,0	13,11,15	12,7,0	276	139	2.15577e-07	5.07128e-05	1.0,1.0,1.0	0.353,0.442,1.0	0.402	40.2
120209	ENSG00000233452	STXBP5-AS1	6	-	147119416	147119477	147074804	147074847	147154493	147154665	120209	4,3,7	1,2,4	2,4,4	0,0,0	200	139	2.38033e-06	0.000350557	0.735,0.51,0.549	1.0,1.0,1.0	-0.402	40.2
21574	ENSG00000120662	MTRF1	13	-	41261582	41261825	41260492	41260915	41263484	41263538	21574	27,22,7	5,7,2	7,11,4	11,13,10	382	139	2.50304e-06	0.000363847	0.663,0.533,0.56	0.188,0.235,0.127	0.402	40.2
23741	ENSG00000121749	TBC1D15	12	+	71884859	71885017	71880468	71880607	71893221	71893324	23741	11,24,4	21,7,13	3,9,13	1,1,2	297	139	0.000755394	0.0268731	0.197,0.616,0.126	0.584,0.808,0.753	-0.402	40.2
59234	ENSG00000181045	SLC26A11	17	+	80220918	80220950	80220437	80220496	80221547	80221794	59234	1,0,0	1,2,1	2,7,0	0,3,4	171	139	0.00133808	0.0401316	0.448,0.0,0.0	1.0,0.655,0.0	-0.402	40.2
27639	ENSG00000196155	PLEKHG4	16	+	67280881	67280984	67277509	67280543	67281090	67281184	27639	0,0,4	8,2,1	2,1,7	1,1,0	242	139	3.34962e-05	0.00271286	0.0,0.0,0.697	0.535,0.365,1.0	-0.401	40.1
5948	ENSG00000139644	TMBIM6	12	+	49744473	49744542	49743416	49743565	49752463	49752549	5948	5,5,1	11,0,7	0,0,1	6,3,5	208	139	0.000225898	0.0112281	0.233,1.0,0.087	0.0,0.0,0.118	0.401	40.1
38552	ENSG00000160336	ZNF761	19	+	53434313	53434466	53433579	53433750	53439827	53439933	38552	6,6,3	1,4,4	7,4,6	2,0,0	292	139	0.000358418	0.0157117	0.741,0.417,0.263	0.625,1.0,1.0	-0.401	40.1
26659	ENSG00000137210	TMEM14B	6	+	10827696	10827824	10808276	10808342	10829006	10829186	26659	3,2,8	2,1,4	0,0,2	1,4,3	267	139	4.79111e-05	0.00353433	0.438,0.51,0.51	0.0,0.0,0.258	0.4	40
116201	ENSG00000111237	VPS29	12	-	110499534	110499546	110496011	110496187	110502048	110502099	116201	3,4,0	2,0,1	0,2,0	2,3,4	151	139	0.000283525	0.0132439	0.58,1.0,0.0	0.0,0.38,0.0	0.4	40
8934	ENSG00000170390	DCLK2	4	+	150253473	150253556	150249567	150249684	150256019	150257438	8934	2,13,13	14,3,4	0,1,2	4,5,6	222	139	0.000573062	0.0219719	0.082,0.731,0.671	0.0,0.111,0.173	0.4	40
116796	ENSG00000265681	RPL17	18	-	49491351	49491432	49490802	49490927	49491531	49491584	116796	20,9,14	52,49,24	4,9,14	6,3,2	220	139	0.000588478	0.0223869	0.195,0.104,0.269	0.296,0.655,0.816	-0.4	40
108301	ENSG00000114021	NIT2	3	+	100339814	100339935	100334700	100334798	100348802	100350011	108301	0,0,1	6,4,3	6,4,4	3,3,3	260	139	4.73224e-07	9.67378e-05	0.0,0.0,0.151	0.517,0.416,0.416	-0.399	39.9
107191	ENSG00000196793	ZNF239	10	-	43567894	43568021	43557528	43558171	43574470	43574597	107191	27,7,24	6,2,4	6,7,6	12,5,8	266	139	1.7858e-05	0.00168295	0.702,0.647,0.758	0.207,0.422,0.282	0.399	39.9
24599	ENSG00000082996	RNF13	3	+	149813924	149814026	149813264	149813486	149846010	149846140	24599	5,12,3	3,5,3	4,3,4	0,1,0	241	139	2.39238e-05	0.0020915	0.49,0.581,0.366	1.0,0.634,1.0	-0.399	39.9
62648	ENSG00000276087	RP11-507M3.1	2	+	24146929	24147086	24135118	24135187	24164197	24164335	62648	9,12,2	6,2,6	4,1,2	0,0,1	296	139	6.78544e-05	0.00456064	0.413,0.738,0.135	1.0,1.0,0.484	-0.399	39.9
21717	ENSG00000160570	DEDD2	19	-	42217631	42217829	42209699	42209840	42220073	42220140	21717	5,4,6	0,3,3	2,3,1	0,0,0	337	139	3.96366e-05	0.00307869	1.0,0.355,0.452	1.0,1.0,1.0	-0.398	39.8
115636	ENSG00000211460	TSN	2	+	121758709	121758806	121755684	121755845	121763004	121763057	115636	2,1,4	3,3,0	5,5,3	0,0,1	236	139	7.38453e-05	0.00488866	0.282,0.164,1.0	1.0,1.0,0.639	-0.398	39.8
137851	ENSG00000088727	KIF9	3	-	47280951	47281195	47277281	47277375	47282494	47282847	137851	40,35,12	1,5,2	17,8,11	6,12,5	383	139	8.61633e-05	0.00549072	0.936,0.718,0.685	0.507,0.195,0.444	0.398	39.8
137862	ENSG00000088727	KIF9	3	-	47282139	47282359	47280951	47281195	47282494	47282847	137862	12,14,3	17,9,4	16,9,11	5,1,2	359	139	0.000792932	0.0278389	0.215,0.376,0.225	0.553,0.777,0.68	-0.398	39.8
81289	ENSG00000141380	SS18	18	-	26082362	26082528	26080304	26080423	26087500	26087577	81289	7,3,2	4,6,0	3,10,6	0,1,0	305	139	2.55022e-05	0.00220912	0.444,0.186,1.0	1.0,0.82,1.0	-0.397	39.7
40210	ENSG00000267002	RP11-242D8.1	17	-	43159422	43159727	43148367	43148783	43166979	43167150	40210	35,36,15	2,4,1	12,5,6	3,3,4	444	139	0.00129861	0.0392727	0.846,0.738,0.824	0.556,0.343,0.32	0.396	39.6
141323	ENSG00000250903	GMDS-AS1	6	+	2263600	2263684	2248836	2248926	2397220	2397626	141323	3,18,11	4,0,7	13,8,1	0,0,0	223	139	5.74442e-06	0.000710229	0.319,1.0,0.495	1.0,1.0,1.0	-0.395	39.5
124382	ENSG00000151338	MIPOL1	14	+	37227725	37227838	37197949	37198104	37240432	37240569	124382	9,4,4	4,2,3	1,4,7	0,1,0	252	139	2.25885e-05	0.00200317	0.554,0.525,0.424	1.0,0.688,1.0	-0.395	39.5
117014	ENSG00000230798	FOXD3-AS1	1	-	63321664	63322080	63321362	63321463	63322315	63322535	117014	46,61,24	6,2,3	4,6,6	5,2,2	555	139	0.000672147	0.0246735	0.658,0.884,0.667	0.167,0.429,0.429	0.395	39.5
10398	ENSG00000167930	FAM234A	16	+	253832	253929	249548	249654	254328	254619	10398	1,4,2	1,3,2	0,0,0	2,2,5	236	139	1.16163e-05	0.00121142	0.371,0.44,0.371	0.0,0.0,0.0	0.394	39.4
27610	ENSG00000197323	TRIM33	1	-	114463411	114463427	114463103	114463236	114510550	114511160	27610	9,2,4	2,3,2	3,1,4	0,0,0	155	139	1.3029e-05	0.00131643	0.801,0.374,0.642	1.0,1.0,1.0	-0.394	39.4
1494	ENSG00000204576	PRR3	6	+	30561309	30561508	30556885	30557450	30561833	30562124	1494	73,55,53	8,17,17	25,37,33	34,28,72	338	139	2.18935e-08	7.33356e-06	0.79,0.571,0.562	0.232,0.352,0.159	0.393	39.3
54548	ENSG00000106077	ABHD11	7	-	73736937	73736990	73736535	73736691	73737561	73737735	54548	2,1,0	5,10,10	1,3,4	1,1,5	192	139	0.000484297	0.0194836	0.225,0.068,0.0	0.42,0.685,0.367	-0.393	39.3
10993	ENSG00000128791	TWSG1	18	+	9367487	9367630	9359971	9360071	9388039	9388140	10993	5,2,6	3,0,5	2,3,1	0,0,0	282	139	2.19084e-06	0.000330549	0.451,1.0,0.372	1.0,1.0,1.0	-0.392	39.2
38899	ENSG00000162804	SNED1	2	+	241062791	241062904	241053152	241053326	241063586	241063700	38899	19,25,15	6,9,2	14,11,27	18,28,23	252	139	2.95869e-05	0.00247933	0.636,0.605,0.805	0.3,0.178,0.393	0.392	39.2
23008	ENSG00000079150	FKBP7	2	-	178473028	178473142	178469651	178469785	178478278	178478553	23008	7,5,1	1,1,0	0,2,2	4,0,2	253	139	0.000163397	0.00882355	0.794,0.733,1.0	0.0,1.0,0.355	0.391	39.1
101329	ENSG00000228340	MIR646HG	20	+	60318920	60319007	60180834	60180913	60320632	60322256	101329	6,16,3	6,1,3	1,1,1	6,2,3	226	139	0.0002512	0.0121908	0.381,0.908,0.381	0.093,0.235,0.17	0.391	39.1
52112	ENSG00000223705	NSUN5P1	7	+	75411407	75411574	75410605	75410726	75411654	75411759	52112	7,8,1	1,0,6	6,1,4	0,0,0	306	139	0.000822176	0.0285324	0.761,1.0,0.07	1.0,1.0,1.0	-0.39	39
104049	ENSG00000197857	ZNF44	19	-	12292572	12292819	12291219	12291250	12293231	12293375	104049	5,8,6	3,2,1	4,3,0	4,4,7	386	139	0.00120164	0.037048	0.375,0.59,0.684	0.265,0.213,0.0	0.39	39
69903	ENSG00000124688	MAD2L1BP	6	+	43635486	43635578	43633193	43633315	43636380	43636646	69903	3,3,2	7,0,3	1,0,1	2,2,6	231	139	0.00155139	0.0443392	0.205,1.0,0.286	0.231,0.0,0.091	0.39	39
91221	ENSG00000144395	CCDC150	2	+	196672344	196672437	196669832	196669876	196674240	196674348	91221	6,12,5	2,5,2	4,2,2	0,0,0	232	139	8.27415e-07	0.000152001	0.643,0.59,0.6	1.0,1.0,1.0	-0.389	38.9
78671	ENSG00000176261	ZBTB8OS	1	-	32634732	32634792	32633950	32634072	32650428	32650550	78671	0,0,2	4,8,11	4,2,4	2,2,7	199	139	2.66192e-05	0.0022882	0.0,0.0,0.113	0.583,0.411,0.285	-0.389	38.9
125852	ENSG00000145012	LPP	3	+	188341655	188341719	188153874	188154021	188406111	188406313	125852	17,5,2	3,7,2	10,17,13	3,0,0	203	139	0.000362127	0.0158001	0.795,0.328,0.406	0.695,1.0,1.0	-0.389	38.9
115436	ENSG00000060762	MPC1	6	-	166368744	166368961	166366968	166367184	166370217	166370221	115436	20,24,21	5,9,1	4,2,2	1,5,7	356	139	0.00182839	0.0497639	0.61,0.51,0.891	0.61,0.135,0.1	0.389	38.9
90079	ENSG00000165795	NDRG2	14	-	21023985	21024096	21023240	21023321	21024848	21025033	90079	13,9,12	2,0,1	14,14,5	5,6,6	250	139	0.000148443	0.00828343	0.783,1.0,0.87	0.609,0.565,0.317	0.387	38.7
79938	ENSG00000167733	HSD11B1L	19	+	5684818	5684838	5681047	5681271	5684964	5685119	79938	2,6,3	6,11,4	6,8,11	4,2,3	159	139	0.000822867	0.0285484	0.226,0.323,0.396	0.567,0.778,0.762	-0.387	38.7
47163	ENSG00000277957	SENP3-EIF4A1	17	+	7574546	7574726	7574259	7574308	7575118	7575258	47163	8,13,8	3,0,0	4,6,6	2,5,2	319	139	0.00129908	0.0392772	0.537,1.0,1.0	0.466,0.343,0.567	0.387	38.7
140803	ENSG00000186951	PPARA	22	+	46176752	46176836	46151883	46151970	46188722	46188822	140803	8,8,5	0,0,0	14,4,4	3,1,4	223	139	5.77209e-07	0.000112225	1.0,1.0,1.0	0.744,0.714,0.384	0.386	38.6
60893	ENSG00000174165	ZDHHC24	11	-	66524154	66524276	66520636	66521466	66526935	66527006	60893	7,13,6	0,0,0	3,5,4	2,4,0	261	139	0.000103469	0.00631712	1.0,1.0,1.0	0.444,0.4,1.0	0.385	38.5
32376	ENSG00000110075	PPP6R3	11	+	68515027	68515166	68461626	68461700	68519500	68519651	32376	8,6,3	2,1,2	2,1,1	0,0,0	278	139	0.00111006	0.0350229	0.667,0.75,0.429	1.0,1.0,1.0	-0.385	38.5
83905	ENSG00000166262	FAM227B	15	-	49620133	49620190	49617943	49618141	49620699	49620818	83905	4,5,3	0,0,0	2,4,3	4,2,0	196	139	0.000190925	0.00991647	1.0,1.0,1.0	0.262,0.586,1.0	0.384	38.4
28149	ENSG00000101474	APMAP	20	-	24964481	24964589	24964220	24964398	24968891	24969084	28149	10,1,8	4,15,2	1,1,2	10,13,16	247	139	0.000498229	0.0198948	0.585,0.036,0.692	0.053,0.041,0.066	0.384	38.4
90891	ENSG00000215908	CROCCP2	1	-	16624272	16624467	16623869	16623997	16625774	16626005	90891	15,10,8	0,0,0	6,3,7	2,3,0	334	139	0.000746376	0.0266137	1.0,1.0,1.0	0.555,0.294,1.0	0.384	38.4
99525	ENSG00000132837	DMGDH	5	-	79078060	79078261	79044303	79044552	79120340	79120453	99525	6,11,2	1,0,5	2,4,2	0,0,0	340	139	0.000902986	0.0304115	0.71,1.0,0.141	1.0,1.0,1.0	-0.383	38.3
54241	ENSG00000056972	TRAF3IP2	6	-	111601195	111601306	111595702	111595820	111605775	111606278	54241	8,8,7	1,1,0	2,8,7	2,2,5	250	139	0.000118685	0.00700333	0.816,0.816,1.0	0.357,0.69,0.438	0.382	38.2
23004	ENSG00000079150	FKBP7	2	-	178469651	178469782	178465769	178465931	178477061	178477213	23004	9,21,13	1,2,1	6,7,10	6,5,3	270	139	0.000293604	0.0135855	0.822,0.844,0.87	0.34,0.419,0.632	0.382	38.2
132854	ENSG00000248498	ASNSP1	8	-	46591336	46591508	46580081	46580237	46593454	46593586	132854	17,32,24	10,3,8	3,5,6	5,9,7	311	139	0.000403833	0.0170951	0.432,0.827,0.573	0.211,0.199,0.277	0.382	38.2
65549	ENSG00000172243	CLEC7A	12	-	10123244	10123363	10118153	10118590	10125296	10125448	65549	2,2,3	0,0,0	4,9,8	1,5,2	258	139	1.95466e-07	4.69678e-05	1.0,1.0,1.0	0.683,0.492,0.683	0.381	38.1
12177	ENSG00000187239	FNBP1	9	-	129919871	129920043	129919158	129919242	129923843	129923939	12177	8,2,5	0,1,1	3,2,1	2,2,1	311	139	0.000247059	0.012023	1.0,0.472,0.691	0.401,0.309,0.309	0.381	38.1
61697	ENSG00000143322	ABL2	1	-	179133311	179133374	179131310	179131481	179229240	179229397	61697	22,13,15	8,3,16	6,2,3	10,9,7	202	139	0.000779375	0.0275276	0.654,0.749,0.392	0.292,0.133,0.228	0.381	38.1
138332	ENSG00000108312	UBTF	17	-	44208618	44209001	44207863	44207911	44209375	44209541	138332	43,45,40	0,3,1	19,16,17	3,4,6	522	139	2.78583e-05	0.00236991	1.0,0.8,0.914	0.628,0.516,0.43	0.38	38
64556	ENSG00000068305	MEF2A	15	+	99631082	99631187	99565416	99565669	99632977	99633173	64556	1,1,1	0,1,0	2,4,0	4,0,2	244	139	0.000198782	0.0102182	1.0,0.363,1.0	0.222,1.0,0.0	0.38	38
143083	ENSG00000267213	AC007773.2	19	-	32391115	32391186	32390049	32390333	32399750	32399868	143083	9,7,5	0,0,0	8,3,8	3,2,2	210	139	6.41281e-06	0.000769706	1.0,1.0,1.0	0.638,0.498,0.726	0.379	37.9
4911	ENSG00000079459	FDFT1	8	+	11803321	11803518	11802767	11802880	11808793	11808891	4911	14,4,21	0,0,0	10,10,4	0,4,3	336	139	1.50355e-05	0.00146396	1.0,1.0,1.0	1.0,0.508,0.355	0.379	37.9
38566	ENSG00000160336	ZNF761	19	+	53443217	53443432	53431992	53432028	53446226	53446337	38566	21,18,7	2,0,0	7,14,8	3,4,2	354	139	4.63298e-05	0.00346098	0.805,1.0,1.0	0.478,0.579,0.611	0.379	37.9
67674	ENSG00000158079	PTPDC1	9	+	94084536	94084768	94064733	94064821	94085250	94085422	67674	258250185	52,53,29	52,38,41	35,51,39	371	139	1.11022e-16	2.13834e-13	0.65,0.639,0.705	0.358,0.218,0.283	0.378	37.8
61106	ENSG00000153558	FBXL2	3	+	33297868	33297962	33297663	33297725	33358966	33359021	61106	2,8,2	7,3,2	0,0,0	2,2,2	233	139	9.61039e-07	0.000170944	0.146,0.614,0.374	0.0,0.0,0.0	0.378	37.8
138972	ENSG00000125814	NAPB	20	-	23397071	23397200	23395138	23395185	23402992	23403072	138972	14,17,9	2,1,1	6,12,14	9,9,3	268	139	0.000378243	0.016274	0.784,0.898,0.824	0.257,0.409,0.708	0.377	37.7
21901	ENSG00000036448	MYOM2	8	+	2142374	2142397	2141140	2141177	2143400	2143456	21901	0,1,1	3,6,3	2,8,1	5,0,3	162	139	0.000388506	0.0166175	0.0,0.125,0.222	0.256,1.0,0.222	-0.377	37.7
32520	ENSG00000164855	TMEM184A	7	-	1555713	1555776	1555265	1555484	1555956	1556120	32520	6,5,2	6,13,10	7,6,6	3,3,2	202	139	0.00118809	0.036712	0.408,0.209,0.121	0.616,0.579,0.674	-0.377	37.7
110760	ENSG00000164828	SUN1	7	+	849922	850096	848417	848615	851383	851482	110760	6,2,1	4,1,0	1,3,2	0,0,0	313	139	0.00120351	0.0370696	0.4,0.47,1.0	1.0,1.0,1.0	-0.377	37.7
138338	ENSG00000108312	UBTF	17	-	44208860	44209001	44208618	44208669	44209351	44209422	138338	7,4,4	0,1,0	3,2,7	2,2,1	280	139	0.000359058	0.0157229	1.0,0.665,1.0	0.427,0.332,0.777	0.376	37.6
118801	ENSG00000189144	ZNF573	19	-	37758475	37758596	37738301	37740194	37759046	37759139	118801	4,5,5	1,7,1	12,8,1	0,1,0	260	139	9.844e-06	0.00107289	0.681,0.276,0.728	1.0,0.81,1.0	-0.375	37.5
40494	ENSG00000006704	GTF2IRD1	7	+	74515344	74515577	74512829	74512971	74518138	74518322	40494	5,10,2	0,1,1	4,7,4	14,2,2	372	139	0.000137817	0.00782148	1.0,0.789,0.428	0.096,0.567,0.428	0.375	37.5
89016	ENSG00000156958	GALK2	15	+	49318110	49318192	49292326	49292537	49318888	49318934	89016	6,5,0	0,3,1	0,2,0	2,2,2	221	139	0.000978347	0.0319719	1.0,0.512,0.0	0.0,0.386,0.0	0.375	37.5
118597	ENSG00000160124	CCDC58	3	-	122366452	122366549	122365564	122365633	122368175	122368322	118597	2,5,0	1,1,4	0,0,1	2,1,3	236	139	0.00145379	0.0424656	0.541,0.747,0.0	0.0,0.0,0.164	0.375	37.5
38897	ENSG00000162804	SNED1	2	+	241062790	241062904	241053152	241053326	241063586	241063700	38897	41,63,25	6,9,2	27,25,52	18,28,23	253	139	3.04944e-07	6.68854e-05	0.79,0.794,0.873	0.452,0.329,0.554	0.374	37.4
74417	ENSG00000133460	SLC2A11	22	+	23857420	23857531	23856950	23856991	23862103	23862202	74417	8,7,10	0,0,1	4,2,3	0,3,2	250	139	0.000730134	0.0262013	1.0,1.0,0.848	1.0,0.27,0.455	0.374	37.4
137424	ENSG00000188833	ENTPD8	9	-	137435718	137435829	137435203	137435338	137436012	137436276	137424	11,17,8	5,1,6	3,2,4	0,0,0	250	139	2.65992e-07	5.98321e-05	0.55,0.904,0.426	1.0,1.0,1.0	-0.373	37.3
27889	ENSG00000154582	TCEB1	8	-	73964486	73964629	73955910	73956054	73972244	73972287	27889	5,9,1	0,1,0	3,4,9	1,5,1	282	139	1.54038e-05	0.0014951	1.0,0.816,1.0	0.597,0.283,0.816	0.373	37.3
27740	ENSG00000196724	ZNF418	19	-	57932432	57932663	57930427	57930554	57933816	57933902	27740	7,5,10	1,5,4	4,2,6	1,0,0	370	139	3.96697e-05	0.00307933	0.724,0.273,0.484	0.6,1.0,1.0	-0.373	37.3
38556	ENSG00000160336	ZNF761	19	+	53445000	53445219	53431992	53432028	53446226	53446337	38556	6,8,9	2,0,0	6,7,7	3,4,2	358	139	0.000325177	0.0146558	0.538,1.0,1.0	0.437,0.405,0.576	0.373	37.3
34648	ENSG00000197275	RAD54B	8	-	94418655	94418783	94411120	94411315	94436494	94436944	34648	8,8,8	7,0,4	1,5,6	0,0,0	267	139	1.45964e-06	0.000239581	0.373,1.0,0.51	1.0,1.0,1.0	-0.372	37.2
42593	ENSG00000022976	ZNF839	14	+	102322232	102322334	102317376	102317666	102325984	102326887	42593	4,6,3	2,3,6	1,1,1	11,7,10	241	139	3.41988e-05	0.00275709	0.536,0.536,0.224	0.05,0.076,0.055	0.372	37.2
67652	ENSG00000158079	PTPDC1	9	+	94084536	94084774	94064733	94064821	94085250	94085422	67652	212215179	52,53,29	52,39,28	35,51,39	377	139	1.22125e-13	1.5206e-10	0.601,0.599,0.695	0.354,0.22,0.209	0.371	37.1
515	ENSG00000178188	SH2B1	16	+	28861620	28861747	28846688	28846827	28863667	28863754	515	5,1,3	1,2,7	0,0,0	1,5,1	266	139	1.19745e-05	0.00123615	0.723,0.207,0.183	0.0,0.0,0.0	0.371	37.1
182	ENSG00000082898	XPO1	2	-	61525269	61525333	61522610	61522683	61525491	61526521	182	2,7,11	2,2,0	0,0,1	2,2,0	203	139	5.21343e-05	0.00375157	0.406,0.706,1.0	0.0,0.0,1.0	0.371	37.1
55864	ENSG00000087191	PSMC5	17	+	63830724	63830944	63830270	63830501	63831035	63831105	55864	8,4,6	2,4,0	1,3,4	0,0,0	359	139	9.2965e-05	0.00582589	0.608,0.279,1.0	1.0,1.0,1.0	-0.371	37.1
139608	ENSG00000107186	MPDZ	9	-	13250827	13250964	13250299	13250372	13279563	13279590	139608	17,21,12	6,7,9	14,5,8	3,0,0	276	139	0.000906971	0.0305047	0.588,0.602,0.402	0.702,1.0,1.0	-0.37	37
1851	ENSG00000273345	CTD-2410N18.4	5	-	134366358	134366541	134359896	134360091	134370997	134371044	1851	3,4,1	1,3,2	0,0,0	3,3,1	322	139	8.32767e-06	0.000945237	0.564,0.365,0.178	0.0,0.0,0.0	0.369	36.9
139538	ENSG00000148248	SURF4	9	-	133375194	133375388	133367258	133367543	133375921	133376166	139538	11,6,17	5,4,3	2,6,2	12,5,13	333	139	7.5524e-05	0.00495984	0.479,0.385,0.703	0.065,0.334,0.06	0.369	36.9
114418	ENSG00000160766	GBAP1	1	-	155224876	155225059	155218847	155218923	155227381	155227422	114418	13,10,1	0,0,0	4,6,7	2,0,4	322	139	0.000106412	0.00645596	1.0,1.0,1.0	0.463,1.0,0.43	0.369	36.9
26040	ENSG00000255284	AP006621.5	11	+	778116	778218	777581	777695	780242	780381	26040	0,5,3	3,2,0	4,2,5	1,0,0	241	139	0.000862367	0.0295446	0.0,0.59,1.0	0.698,1.0,1.0	-0.369	36.9
27995	ENSG00000164733	CTSB	8	-	11864375	11864483	11861405	11861479	11868000	11868070	27995	2,4,3	2,0,0	5,4,2	1,7,3	247	139	0.00135966	0.0405717	0.36,1.0,1.0	0.738,0.243,0.273	0.369	36.9
85019	ENSG00000092931	MFSD11	17	+	76737692	76737918	76736189	76737091	76738281	76738448	85019	42,37,19	20,29,30	64,66,61	13,8,12	365	139	2.74961e-07	6.16247e-05	0.444,0.327,0.194	0.652,0.759,0.659	-0.368	36.8
75486	ENSG00000007944	MYLIP	6	+	16143703	16143916	16143019	16143217	16144896	16145317	75486	13,15,9	0,10,5	21,19,15	1,0,0	352	139	8.08573e-06	0.000925444	1.0,0.372,0.415	0.892,1.0,1.0	-0.368	36.8
109884	ENSG00000090266	NDUFB2	7	+	140697295	140697516	140696987	140697074	140702865	140703004	109884	25,25,21	7,9,8	5,8,8	24,8,18	360	139	7.05591e-08	2.02741e-05	0.58,0.517,0.503	0.074,0.279,0.146	0.367	36.7
11488	ENSG00000129566	TEP1	14	-	20372732	20372857	20371488	20371632	20373010	20373147	11488	30,39,10	1,0,0	2,23,10	3,2,2	264	139	6.42283e-05	0.00437296	0.94,1.0,1.0	0.26,0.858,0.725	0.366	36.6
89629	ENSG00000167106	FAM102A	9	-	127962926	127963153	127953804	127953925	127963721	127963745	89629	3,1,4	3,6,0	2,2,2	1,0,0	366	139	8.49179e-05	0.00542924	0.275,0.06,1.0	0.432,1.0,1.0	-0.366	36.6
17028	ENSG00000055955	ITIH4	3	-	52818643	52818727	52818525	52818536	52819392	52819518	17028	2,0,0	4,12,7	1,1,4	1,2,1	223	139	0.00081203	0.0282679	0.238,0.0,0.0	0.384,0.238,0.714	-0.366	36.6
114140	ENSG00000132481	TRIM47	17	-	75876717	75876813	75876261	75876492	75877873	75878575	114140	7,7,14	4,4,1	13,17,17	0,0,0	235	139	4.20057e-07	8.74648e-05	0.509,0.509,0.892	1.0,1.0,1.0	-0.363	36.3
62005	ENSG00000166323	C11orf65	11	-	108406762	108406919	108393207	108393378	108461478	108461568	62005	1,2,6	4,1,2	0,0,1	7,5,5	296	139	3.45496e-05	0.00277448	0.105,0.484,0.585	0.0,0.0,0.086	0.363	36.3
120069	ENSG00000250802	ZBED3-AS1	5	+	77088744	77088799	77088376	77088472	77089345	77089403	120069	1,2,3	8,1,3	0,0,0	3,6,5	194	139	0.000958627	0.0315702	0.082,0.589,0.417	0.0,0.0,0.0	0.363	36.3
1849	ENSG00000273345	CTD-2410N18.4	5	-	134350212	134350427	134330589	134330711	134370997	134371044	1849	4,20,7	0,1,1	0,10,7	3,1,1	354	139	0.00110591	0.0349138	1.0,0.887,0.733	0.0,0.797,0.733	0.363	36.3
57145	ENSG00000161513	FDXR	17	-	74864479	74864492	74864275	74864347	74864823	74864931	57145	8,4,2	5,2,2	6,9,10	0,2,0	152	139	6.95457e-05	0.00465401	0.594,0.647,0.478	1.0,0.805,1.0	-0.362	36.2
118279	ENSG00000103051	COG4	16	-	70519676	70519727	70517625	70517740	70523372	70523558	118279	3,4,1	4,0,4	0,1,0	1,1,4	190	139	0.000273851	0.0129287	0.354,1.0,0.155	0.0,0.422,0.0	0.362	36.2
118593	ENSG00000160124	CCDC58	3	-	122366335	122366467	122365335	122365466	122368175	122368322	118593	4,2,2	1,4,2	0,0,2	1,4,7	271	139	0.000525152	0.0206488	0.672,0.204,0.339	0.0,0.0,0.128	0.362	36.2
26919	ENSG00000204650	CRHR1-IT1	17	+	45639392	45639520	45629903	45630158	45645900	45646008	26919	15,11,9	6,7,2	1,6,5	12,13,4	267	139	0.000549927	0.0213665	0.566,0.45,0.701	0.042,0.194,0.394	0.362	36.2
136586	ENSG00000063761	ADCK1	14	+	77827853	77827971	77822434	77822518	77830158	77830316	136586	15,9,2	4,2,2	3,5,8	0,0,1	257	139	4.36855e-05	0.0033118	0.67,0.709,0.351	1.0,1.0,0.812	-0.361	36.1
120033	ENSG00000242574	HLA-DMB	6	-	32935535	32935652	32935341	32935377	32937171	32937456	120033	4,7,5	1,2,2	7,4,7	0,0,0	256	139	0.000861417	0.0295202	0.685,0.655,0.576	1.0,1.0,1.0	-0.361	36.1
106909	ENSG00000164050	PLXNB1	3	-	48420223	48420257	48419604	48419674	48420664	48420773	106909	12,3,9	10,19,6	7,13,18	3,2,5	173	139	0.0010847	0.0345056	0.491,0.113,0.547	0.652,0.839,0.743	-0.361	36.1
59798	ENSG00000124782	RREB1	6	+	7240437	7240602	7228996	7231907	7248510	7250012	59798	28,13,10	1,0,0	3,11,19	1,6,2	304	139	5.32907e-06	0.000666226	0.928,1.0,1.0	0.578,0.456,0.813	0.36	36
125423	ENSG00000188690	UROS	10	-	125792578	125792744	125788724	125789005	125794021	125794388	125423	7,8,13	4,4,0	3,7,3	0,0,0	305	139	5.44429e-06	0.00067994	0.444,0.477,1.0	1.0,1.0,1.0	-0.36	36
922	ENSG00000197958	RPL12	9	-	127450730	127450802	127449280	127449362	127451280	127451373	922	3,8,2	0,1,0	3,4,4	0,11,2	211	139	7.88511e-05	0.00512645	1.0,0.841,1.0	1.0,0.193,0.569	0.36	36
55074	ENSG00000177694	NAALADL2	3	+	174540727	174540847	174536620	174536683	174550568	174550637	55074	7,2,4	2,6,2	0,0,3	4,6,5	259	139	0.000661288	0.0243911	0.653,0.152,0.518	0.0,0.0,0.244	0.36	36
128495	ENSG00000103852	TTC23	15	-	99245388	99245510	99228532	99228732	99249416	99249518	128495	1,2,1	7,1,6	13,8,4	11,2,1	261	139	0.00131399	0.0395935	0.071,0.516,0.082	0.386,0.681,0.681	-0.36	36
126763	ENSG00000156374	PCGF6	10	-	103347237	103347297	103345023	103345132	103348715	103348812	126763	14,9,13	3,5,6	14,19,10	0,0,0	199	139	7.87068e-09	3.02241e-06	0.765,0.557,0.602	1.0,1.0,1.0	-0.359	35.9
1495	ENSG00000204576	PRR3	6	+	30561309	30561508	30558149	30558212	30561833	30562124	1495	73,53,54	1,4,3	25,39,33	14,11,9	338	139	5.2782e-08	1.56026e-05	0.968,0.845,0.881	0.423,0.593,0.601	0.359	35.9
6945	ENSG00000010626	LRRC23	12	+	6907321	6907445	6906408	6906662	6913890	6913968	6945	18,15,10	0,0,0	22,10,8	12,7,0	263	139	1.76876e-07	4.32599e-05	1.0,1.0,1.0	0.492,0.43,1.0	0.359	35.9
62335	ENSG00000196118	CCDC189	16	-	30759011	30759101	30757466	30757654	30759177	30759247	62335	18,3,2	3,4,3	0,2,1	9,15,2	229	139	1.48102e-05	0.0014489	0.785,0.313,0.288	0.0,0.075,0.233	0.359	35.9
113374	ENSG00000169519	METTL15	11	+	28316756	28316905	28296752	28296931	28328094	28328165	113374	4,2,1	3,1,2	0,0,0	12,1,2	288	139	4.44525e-05	0.00334935	0.392,0.491,0.194	0.0,0.0,0.0	0.359	35.9
136348	ENSG00000171084	FAM86JP	3	+	125923663	125923796	125920663	125920905	125923878	125924140	136348	7,9,5	2,1,3	14,16,19	0,0,0	272	139	7.45511e-05	0.00491165	0.641,0.821,0.46	1.0,1.0,1.0	-0.359	35.9
114853	ENSG00000177989	ODF3B	22	-	50530687	50530828	50530425	50530560	50530936	50531058	114853	1,12,13	5,12,0	5,6,2	0,0,1	280	139	0.000103903	0.00634052	0.09,0.332,1.0	1.0,1.0,0.498	-0.359	35.9
100249	ENSG00000189190	ZNF600	19	-	52780580	52780725	52778825	52778907	52786594	52786700	100249	15,9,5	3,4,7	6,6,2	15,20,7	284	139	0.000591752	0.0224702	0.71,0.524,0.259	0.164,0.128,0.123	0.359	35.9
34894	ENSG00000258458	CTD-2555K7.2	14	-	22764461	22764653	22764122	22764242	22766423	22766530	34894	5,5,7	2,3,0	6,6,2	0,0,0	331	139	0.00100953	0.0327392	0.512,0.412,1.0	1.0,1.0,1.0	-0.359	35.9
137857	ENSG00000088727	KIF9	3	-	47280951	47281192	47277281	47277375	47282494	47282847	137857	23,26,6	1,5,2	12,7,9	6,12,5	380	139	0.00103883	0.0334256	0.894,0.655,0.523	0.422,0.176,0.397	0.359	35.9
107135	ENSG00000134686	PHC2	1	-	33368535	33368622	33367115	33367428	33370420	33370585	107135	17,7,17	0,0,0	15,12,6	2,2,8	226	139	3.40264e-07	7.32987e-05	1.0,1.0,1.0	0.822,0.787,0.316	0.358	35.8
103444	ENSG00000187860	CCDC157	22	+	30375523	30375663	30373850	30374091	30376258	30376347	103444	4,6,8	2,4,0	1,6,1	0,0,0	279	139	0.000168688	0.00901697	0.499,0.428,1.0	1.0,1.0,1.0	-0.358	35.8
19021	ENSG00000075413	MARK3	14	+	103500155	103500200	103498501	103498528	103502881	103503282	19021	10,13,0	0,6,6	7,4,3	0,0,1	184	139	0.000201878	0.010353	1.0,0.621,0.0	1.0,1.0,0.694	-0.358	35.8
130378	ENSG00000265843	LINC01029	18	-	77979494	77979637	77971503	77972513	77989818	77989912	130378	2,4,6	1,2,2	12,8,20	0,2,0	282	139	0.000996778	0.0324568	0.496,0.496,0.597	1.0,0.663,1.0	-0.358	35.8
67666	ENSG00000158079	PTPDC1	9	+	94084536	94084704	94064733	94064821	94085250	94085422	67666	129,128,82	52,53,29	26,16,17	35,51,39	307	139	1.33227e-15	2.34607e-12	0.529,0.522,0.561	0.252,0.124,0.165	0.357	35.7
111699	ENSG00000162585	FAAP20	1	-	2189712	2189876	2186837	2187206	2193638	2193910	111699	3,13,4	0,0,0	3,5,7	0,5,2	303	139	2.0338e-05	0.00185019	1.0,1.0,1.0	1.0,0.314,0.616	0.357	35.7
91047	ENSG00000106100	NOD1	7	-	30463608	30463698	30459900	30460041	30478605	30478742	91047	5,14,8	21,14,2	3,0,0	11,9,13	229	139	3.15761e-05	0.00260281	0.126,0.378,0.708	0.142,0.0,0.0	0.357	35.7
3974	ENSG00000254518	RP11-347H15.4	11	+	50303132	50303262	50298578	50298917	50304580	50304656	3974	8,3,6	1,5,2	7,5,4	0,1,0	269	139	3.22703e-05	0.0026431	0.805,0.237,0.608	1.0,0.721,1.0	-0.357	35.7
114409	ENSG00000160766	GBAP1	1	-	155224876	155225087	155217963	155218049	155227381	155227422	114409	7,9,1	1,2,2	3,2,8	0,0,2	350	139	0.000675357	0.0247397	0.735,0.641,0.166	1.0,1.0,0.614	-0.357	35.7
102949	ENSG00000004660	CAMKK1	17	-	3881498	3881648	3880345	3880434	3882256	3882370	102949	3,1,3	1,0,0	2,2,1	2,0,2	289	139	0.00155216	0.0443511	0.591,1.0,1.0	0.325,1.0,0.194	0.357	35.7
129238	ENSG00000283050	GTF2IP12	4	-	119450040	119450150	119448827	119448959	119454245	119454638	129238	11,12,12	5,3,3	7,7,1	0,0,0	249	139	1.14686e-07	3.00788e-05	0.551,0.691,0.691	1.0,1.0,1.0	-0.356	35.6
93445	ENSG00000123329	ARHGAP9	12	-	57483894	57483963	57480777	57480834	57488611	57488814	93445	6,0,3	6,3,1	0,0,0	1,3,3	208	139	5.68716e-05	0.00398771	0.401,0.0,0.667	0.0,0.0,0.0	0.356	35.6
144294	ENSG00000183963	SMTN	22	+	31081321	31081456	31080449	31080754	31082909	31083002	144294	5,5,9	5,3,2	0,2,2	5,11,2	274	139	0.000228977	0.0113446	0.337,0.458,0.695	0.0,0.084,0.337	0.356	35.6
1489	ENSG00000204576	PRR3	6	+	30561327	30561508	30557313	30557450	30561833	30562124	1489	95,68,63	8,17,17	39,55,50	34,28,72	320	139	8.12438e-07	0.000150212	0.838,0.635,0.617	0.333,0.46,0.232	0.355	35.5
116377	ENSG00000262468	LINC01569	16	-	4246988	4247061	4246373	4246860	4251321	4252034	116377	12,4,8	2,9,3	3,6,8	0,0,2	212	139	0.000365355	0.0158927	0.797,0.226,0.636	1.0,1.0,0.724	-0.355	35.5
143840	ENSG00000169379	ARL13B	3	+	93996562	93996684	93995873	93995944	94035330	94035436	143840	5,5,6	1,1,0	17,1,7	3,2,5	261	139	0.000710341	0.0257081	0.727,0.727,1.0	0.751,0.21,0.427	0.355	35.5
51184	ENSG00000197070	ARRDC1	9	+	137613422	137613536	137612895	137613006	137613614	137613664	51184	1,0,1	0,4,6	2,3,3	1,0,1	253	139	7.46566e-06	0.000872293	1.0,0.0,0.084	0.524,1.0,0.622	-0.354	35.4
76758	ENSG00000243554	AC004967.7	7	-	97970611	97970730	97970133	97970227	97972134	97972254	76758	17,18,8	4,10,5	1,4,8	11,9,8	258	139	0.000517605	0.0204172	0.696,0.492,0.463	0.047,0.193,0.35	0.354	35.4
117009	ENSG00000230798	FOXD3-AS1	1	-	63321850	63322080	63321366	63321463	63322315	63322436	117009	3,14,4	6,2,3	0,1,0	5,2,2	369	139	8.42009e-06	0.000950475	0.158,0.725,0.334	0.0,0.158,0.0	0.353	35.3
27514	ENSG00000232803	SLCO4A1-AS1	20	-	62664963	62665158	62663030	62663487	62666384	62666622	27514	11,8,8	4,8,7	0,0,2	2,2,8	334	139	5.10534e-06	0.000642819	0.534,0.294,0.322	0.0,0.0,0.094	0.352	35.2
6619	ENSG00000169683	LRRC45	17	+	82029526	82029748	82029092	82029185	82030064	82030238	6619	8,5,9	0,0,0	7,11,19	2,3,2	361	139	7.61693e-06	0.000884102	1.0,1.0,1.0	0.574,0.585,0.785	0.352	35.2
27306	ENSG00000232160	RAP2C-AS1	X	+	132316360	132316518	132218506	132218837	132429812	132432862	27306	0,0,2	2,6,2	1,5,2	2,1,1	297	139	0.000385077	0.016525	0.0,0.0,0.319	0.19,0.701,0.483	-0.352	35.2
103819	ENSG00000261127	RP11-17M15.2	16	-	32305022	32305189	32304069	32304159	32310311	32310555	103819	1,10,6	0,0,0	4,14,4	0,3,5	306	139	1.2457e-05	0.00127009	1.0,1.0,1.0	1.0,0.679,0.267	0.351	35.1
54710	ENSG00000146963	LUC7L2	7	+	139371386	139371463	139363365	139363452	139376061	139376156	54710	8,14,11	5,2,2	11,8,8	8,16,10	216	139	0.0016887	0.0469996	0.507,0.818,0.78	0.469,0.243,0.34	0.351	35.1
66889	ENSG00000122420	PTGFR	1	+	78497873	78497944	78492671	78493541	78532212	78532353	66889	7,12,8	2,5,3	9,9,6	0,0,0	210	139	2.21217e-07	5.16455e-05	0.698,0.614,0.638	1.0,1.0,1.0	-0.35	35
55020	ENSG00000113360	DROSHA	5	-	31531449	31531583	31530797	31530924	31531989	31532074	55020	62,62,34	4,11,2	56,33,29	25,24,13	273	139	2.71341e-07	6.09243e-05	0.888,0.742,0.896	0.533,0.412,0.532	0.35	35
108558	ENSG00000168488	ATXN2L	16	+	28836363	28836485	28835932	28836122	28836747	28837232	108558	2,3,2	1,1,0	1,2,0	6,0,5	261	139	0.000154454	0.00849199	0.516,0.615,1.0	0.082,1.0,0.0	0.35	35
136818	ENSG00000258388	PPT2-EGFL8	6	+	32164586	32164657	32162567	32162622	32166137	32166252	136818	7,4,2	5,2,3	0,2,0	1,3,3	210	139	0.000312079	0.0142267	0.481,0.57,0.306	0.0,0.306,0.0	0.35	35
118051	ENSG00000258472	RP11-192H23.4	17	-	28611142	28611253	28604275	28605215	28611566	28611656	118051	0,4,7	2,1,1	0,1,1	1,2,2	250	139	0.00103651	0.0333857	0.0,0.69,0.796	0.0,0.218,0.218	0.35	35
13123	ENSG00000182986	ZNF320	19	-	52893778	52893927	52890240	52890328	52897519	52897654	13123	4,2,6	0,0,0	2,10,2	3,2,0	288	139	0.00143451	0.0420872	1.0,1.0,1.0	0.243,0.707,1.0	0.35	35
97684	ENSG00000028310	BRD9	5	-	869244	869394	868748	868804	870472	870575	97684	13,4,3	3,5,0	1,5,4	0,0,0	289	139	1.17934e-05	0.00122368	0.676,0.278,1.0	1.0,1.0,1.0	-0.349	34.9
109915	ENSG00000090266	NDUFB2	7	+	140697295	140697471	140696987	140697074	140702865	140703010	109915	16,11,9	7,9,8	1,2,1	24,8,18	315	139	8.96474e-11	6.27873e-08	0.502,0.35,0.332	0.018,0.099,0.024	0.348	34.8
51701	ENSG00000158321	AUTS2	7	+	70768023	70768068	70766113	70766334	70771548	70771644	51701	9,20,2	0,7,4	10,20,21	0,0,0	184	139	1.72605e-05	0.00163665	1.0,0.683,0.274	1.0,1.0,1.0	-0.348	34.8
3657	ENSG00000175826	CTDNEP1	17	-	7251964	7252073	7251194	7251601	7252413	7252474	3657	6,5,4	3,0,3	2,9,2	0,0,0	248	139	0.000119435	0.00703749	0.529,1.0,0.428	1.0,1.0,1.0	-0.348	34.8
120207	ENSG00000233452	STXBP5-AS1	6	-	146911551	146911665	146851116	146851331	146972044	146972070	120207	8,4,0	2,2,2	1,1,0	6,6,3	253	139	0.000195111	0.0100631	0.687,0.524,0.0	0.084,0.084,0.0	0.348	34.8
56919	ENSG00000183647	ZNF530	19	+	57604276	57604406	57599884	57600134	57612502	57612722	56919	11,7,7	0,2,1	8,7,10	6,7,3	269	139	0.000814424	0.0283108	1.0,0.644,0.783	0.408,0.341,0.633	0.348	34.8
93	ENSG00000273018	CTD-2303H24.2	17	-	18532505	18532597	18528572	18528747	18542087	18542187	93	2,4,1	1,1,0	2,1,2	1,1,3	231	139	0.00125415	0.0382284	0.546,0.706,1.0	0.546,0.376,0.286	0.348	34.8
143099	ENSG00000171456	ASXL1	20	+	32371777	32371874	32369014	32369123	32372163	32372238	143099	10,9,7	4,17,9	1,4,0	27,25,10	236	139	8.14653e-07	0.000150212	0.596,0.238,0.314	0.021,0.086,0.0	0.347	34.7
107321	ENSG00000004779	NDUFAB1	16	-	23595428	23595638	23585335	23585423	23596122	23596303	107321	25,25,20	6,7,9	8,7,10	16,14,9	349	139	1.13425e-05	0.00118962	0.624,0.587,0.47	0.166,0.166,0.307	0.347	34.7
143539	ENSG00000079277	MKNK1	1	-	46585495	46585736	46583227	46583329	46585873	46585935	143539	10,5,8	3,1,0	1,0,1	2,2,0	380	139	0.000265391	0.0126065	0.549,0.647,1.0	0.155,0.0,1.0	0.347	34.7
134003	ENSG00000104901	DKKL1	19	+	49365792	49365885	49363593	49364008	49374716	49374961	134003	5,3,13	0,0,1	9,3,3	2,1,2	232	139	0.00113371	0.0355324	1.0,1.0,0.886	0.729,0.643,0.473	0.347	34.7
91712	ENSG00000204179	PTPN20	10	+	46946562	46946675	46911395	46911501	46984229	46984564	91712	3,1,1	4,1,0	2,2,4	0,0,1	252	139	0.00115445	0.0360425	0.293,0.355,1.0	1.0,1.0,0.688	-0.347	34.7
120167	ENSG00000023330	ALAS1	3	+	52198671	52198848	52198143	52198255	52199220	52199440	120167	64,65,36	15,7,5	46,44,61	27,42,35	316	139	8.94555e-08	2.46687e-05	0.652,0.803,0.76	0.428,0.315,0.434	0.346	34.6
138453	ENSG00000204852	TCTN1	12	+	110644991	110645143	110641048	110641149	110647210	110647262	138453	10,8,11	0,1,1	2,3,14	6,1,1	291	139	0.000455414	0.0185763	1.0,0.793,0.84	0.137,0.589,0.87	0.346	34.6
140509	ENSG00000111224	PARP11	12	-	3828909	3829030	3826157	3826233	3829889	3830018	140509	33,62,39	14,12,21	27,4,11	30,33,10	260	139	2.79433e-05	0.00237491	0.558,0.734,0.498	0.325,0.061,0.37	0.345	34.5
11785	ENSG00000132912	DCTN4	5	-	150757920	150757948	150756416	150756487	150758585	150758698	11785	3,5,5	4,3,0	8,3,5	0,0,0	167	139	4.06877e-05	0.00312684	0.384,0.581,1.0	1.0,1.0,1.0	-0.345	34.5
72698	ENSG00000137812	CASC5	15	+	40611483	40611511	40610244	40610297	40615340	40615378	72698	5,16,3	6,0,2	2,8,7	0,0,0	167	139	6.12745e-05	0.00422362	0.41,1.0,0.555	1.0,1.0,1.0	-0.345	34.5
126889	ENSG00000141568	FOXK2	17	+	82595781	82596191	82593421	82593954	82601302	82602392	126889	30,45,24	0,2,1	28,13,30	4,7,3	549	139	0.000115393	0.00686827	1.0,0.851,0.859	0.639,0.32,0.717	0.345	34.5
92941	ENSG00000055147	FAM114A2	5	-	154038292	154038434	154034875	154034946	154038856	154038921	92941	11,11,6	0,1,0	6,6,8	3,1,3	281	139	4.74648e-06	0.000608829	1.0,0.845,1.0	0.497,0.748,0.569	0.344	34.4
145211	ENSG00000138614	VWA9	15	-	65607301	65607370	65605128	65605236	65611097	65611258	145211	6,3,4	1,0,0	3,3,7	3,1,2	208	139	0.000173904	0.00922758	0.8,1.0,1.0	0.401,0.667,0.701	0.344	34.4
44627	ENSG00000106133	NSUN5P2	7	-	72950285	72950444	72950057	72950196	72953325	72953430	44627	4,7,1	2,0,3	4,4,3	1,0,0	298	139	0.000747571	0.0266409	0.483,1.0,0.135	0.651,1.0,1.0	-0.344	34.4
12449	ENSG00000235944	ZNF815P	7	+	5833526	5833568	5823215	5823526	5840689	5840856	12449	4,2,3	2,2,2	4,6,9	2,0,0	181	139	0.000818492	0.0284286	0.606,0.434,0.535	0.606,1.0,1.0	-0.344	34.4
145057	ENSG00000186272	ZNF17	19	+	57417911	57418034	57411178	57411406	57419634	57419745	145057	2,5,2	1,1,0	3,1,2	3,1,1	262	139	0.00109072	0.0346207	0.515,0.726,1.0	0.347,0.347,0.515	0.344	34.4
43673	ENSG00000197548	ATG7	3	+	11282192	11282438	11280993	11281102	11298685	11298855	43673	9,5,9	0,0,0	4,10,10	3,0,2	385	139	0.00135668	0.0405318	1.0,1.0,1.0	0.325,1.0,0.644	0.344	34.4
78770	ENSG00000143630	HCN3	1	+	155283973	155284135	155282410	155282840	155284538	155284757	78770	10,16,5	6,0,2	9,9,7	0,0,0	301	139	1.87478e-05	0.0017402	0.435,1.0,0.536	1.0,1.0,1.0	-0.343	34.3
21765	ENSG00000260238	PMF1-BGLAP	1	+	156233627	156233734	156213008	156213176	156236287	156236483	21765	9,19,6	1,3,1	1,1,0	0,1,4	246	139	0.00070653	0.0256228	0.836,0.782,0.772	1.0,0.361,0.0	0.343	34.3
45338	ENSG00000198408	MGEA5	10	-	101793685	101793744	101792838	101792943	101797979	101798017	45338	3,2,8	2,1,0	3,2,3	13,1,4	198	139	0.00104885	0.0336688	0.513,0.584,1.0	0.139,0.584,0.345	0.343	34.3
52024	ENSG00000147586	MRPS28	8	-	80028694	80028796	80002998	80003180	80029760	80029912	52024	6,7,4	10,16,12	8,9,10	6,2,6	241	139	0.00132271	0.0398062	0.257,0.201,0.161	0.435,0.722,0.49	-0.343	34.3
57929	ENSG00000152795	HNRNPDL	4	-	82425562	82425667	82424629	82424883	82426036	82426129	57929	424342335	108,143,90	172197119	224207186	244	139	0	0	0.691,0.577,0.68	0.304,0.352,0.267	0.342	34.2
50846	ENSG00000141582	CBX4	17	-	79835479	79835702	79833155	79835395	79835976	79836145	50846	14,22,25	7,5,4	6,6,5	10,6,5	362	139	0.000441949	0.0182322	0.434,0.628,0.706	0.187,0.277,0.277	0.342	34.2
68194	ENSG00000196295	AC005154.6	7	-	30551317	30551459	30550635	30550781	30552099	30552179	68194	10,7,5	6,7,11	4,2,2	0,1,1	281	139	0.0013654	0.0406739	0.452,0.331,0.184	1.0,0.497,0.497	-0.342	34.2
68467	ENSG00000197119	SLC25A29	14	-	100295625	100295993	100293293	100293377	100298841	100298885	68467	178193142	32,48,32	55,65,43	48,52,62	507	139	0	0	0.604,0.524,0.549	0.239,0.255,0.16	0.341	34.1
21932	ENSG00000188825	LINC00910	17	-	43379122	43379262	43375927	43377813	43381272	43381660	21932	9,17,14	2,0,0	2,3,8	1,1,3	279	139	0.00124318	0.0379596	0.692,1.0,1.0	0.499,0.599,0.571	0.341	34.1
134866	ENSG00000234062	RP11-308D16.2	X	+	136921243	136922776	136909394	136909780	136925246	136925379	134866	61,62,48	2,5,6	9,30,10	2,8,8	1672	139	0.000357753	0.015688	0.717,0.508,0.399	0.272,0.238,0.094	0.34	34
21586	ENSG00000120662	MTRF1	13	-	41262047	41262331	41260492	41260915	41263484	41263569	21586	19,26,27	5,7,2	14,26,8	11,13,10	423	139	0.0015277	0.0438759	0.555,0.55,0.816	0.295,0.397,0.208	0.34	34
6073	ENSG00000025423	HSD17B6	12	+	56763217	56763414	56752448	56752581	56773833	56774165	6073	10,7,1	0,2,0	5,10,6	3,5,1	336	139	0.000833667	0.0288258	1.0,0.591,1.0	0.408,0.453,0.713	0.339	33.9
111702	ENSG00000178038	ALS2CL	3	-	46683133	46683322	46682028	46682094	46683781	46683848	111702	15,12,23	2,6,3	7,10,13	0,0,0	328	139	1.23084e-07	3.19415e-05	0.761,0.459,0.765	1.0,1.0,1.0	-0.338	33.8
55031	ENSG00000113360	DROSHA	5	-	31531449	31531552	31530797	31530924	31531989	31532074	55031	62,62,34	4,11,2	56,33,28	25,24,13	242	139	1.56092e-07	3.89778e-05	0.899,0.764,0.907	0.563,0.441,0.553	0.338	33.8
55865	ENSG00000087191	PSMC5	17	+	63830724	63830913	63830270	63830501	63831035	63831105	55865	7,6,8	2,4,0	1,4,1	0,0,0	328	139	0.000147082	0.00822239	0.597,0.389,1.0	1.0,1.0,1.0	-0.338	33.8
85495	ENSG00000120860	CCDC53	12	-	102050188	102050291	102046053	102046119	102061911	102062034	85495	6,10,11	5,6,3	8,5,5	0,2,0	242	139	0.0002896	0.0134659	0.408,0.489,0.678	1.0,0.589,1.0	-0.338	33.8
113683	ENSG00000106070	GRB10	7	-	50757061	50757249	50755891	50756056	50779134	50779177	113683	1,16,9	3,6,2	1,3,3	11,8,9	327	139	0.000851317	0.0292636	0.124,0.531,0.657	0.037,0.137,0.124	0.338	33.8
25431	ENSG00000105518	TMEM205	19	-	11345539	11345558	11345251	11345415	11346126	11346248	25431	0,2,0	1,6,3	2,1,3	2,2,3	158	139	0.00161461	0.0456278	0.0,0.227,0.0	0.468,0.305,0.468	-0.338	33.8
100248	ENSG00000189190	ZNF600	19	-	52780580	52780735	52778825	52778907	52786594	52786700	100248	16,8,4	3,4,7	6,6,2	15,20,7	294	139	0.00176001	0.0484157	0.716,0.486,0.213	0.159,0.124,0.119	0.338	33.8
85025	ENSG00000092931	MFSD11	17	+	76737692	76737883	76736189	76737091	76738281	76738442	85025	28,36,25	20,29,30	54,42,55	13,8,12	330	139	3.36506e-08	1.06633e-05	0.371,0.343,0.26	0.636,0.689,0.659	-0.337	33.7
28429	ENSG00000073605	GSDMB	17	-	39908175	39908214	39906960	39906987	39908957	39909042	28429	4,9,9	3,3,2	2,5,2	0,0,0	178	139	1.64995e-06	0.000264479	0.51,0.701,0.778	1.0,1.0,1.0	-0.337	33.7
38281	ENSG00000161526	SAP30BP	17	+	75703137	75703371	75702479	75702571	75704755	75704814	38281	9,9,12	1,3,2	1,1,7	0,0,0	373	139	6.74191e-05	0.00453792	0.77,0.528,0.691	1.0,1.0,1.0	-0.337	33.7
33510	ENSG00000175455	CCDC14	3	-	123949383	123949487	123948895	123949132	123956045	123956115	33510	14,16,11	10,15,3	0,7,2	23,7,8	243	139	0.00021222	0.0107201	0.445,0.379,0.677	0.0,0.364,0.125	0.337	33.7
54656	ENSG00000162894	FCMR	1	-	206909461	206909520	206904524	206905147	206909724	206909945	54656	5,12,13	4,7,4	11,12,8	3,0,0	198	139	0.000352316	0.0155268	0.467,0.546,0.695	0.72,1.0,1.0	-0.337	33.7
138341	ENSG00000108312	UBTF	17	-	44208860	44209004	44208618	44208669	44209351	44209541	138341	6,0,7	0,1,0	2,0,4	2,2,1	283	139	0.000352429	0.0155268	1.0,0.0,1.0	0.329,0.0,0.663	0.336	33.6
81286	ENSG00000141380	SS18	18	-	26082362	26082528	26078075	26078160	26084051	26084175	81286	5,2,5	2,1,3	9,2,4	1,0,1	305	139	0.000726043	0.0260919	0.533,0.477,0.432	0.804,1.0,0.646	-0.336	33.6
55011	ENSG00000113360	DROSHA	5	-	31531449	31531521	31530797	31530924	31531989	31532074	55011	55,60,31	4,11,2	50,30,26	25,24,13	211	139	8.96974e-08	2.46802e-05	0.901,0.782,0.911	0.569,0.452,0.569	0.335	33.5
97587	ENSG00000151693	ASAP2	2	+	9391061	9391196	9388382	9388546	9393481	9393647	97587	30,37,24	17,15,6	7,7,21	24,28,13	274	139	0.000152587	0.00843204	0.472,0.556,0.67	0.129,0.113,0.45	0.335	33.5
143652	ENSG00000179950	PUF60	8	-	143825011	143825157	143824312	143824399	143828983	143829028	143652	2,5,0	1,2,1	1,0,0	12,5,7	285	139	0.000501879	0.0199887	0.494,0.549,0.0	0.039,0.0,0.0	0.335	33.5
131218	ENSG00000165629	ATP5C1	10	+	7796120	7796159	7788174	7788263	7797046	7797178	131218	10,13,11	50,71,66	24,34,15	20,22,22	178	139	3.30788e-10	1.98904e-07	0.135,0.125,0.115	0.484,0.547,0.347	-0.334	33.4
46270	ENSG00000259024	TVP23C-CDRT4	17	-	15503097	15503232	15440207	15440285	15540432	15540561	46270	12,21,21	6,10,6	7,3,3	7,8,8	274	139	0.000389908	0.0166595	0.504,0.516,0.64	0.337,0.16,0.16	0.334	33.4
21772	ENSG00000260238	PMF1-BGLAP	1	+	156225556	156225668	156212981	156213176	156233627	156233728	21772	16,14,17	11,13,5	10,11,12	1,1,2	251	139	0.000551123	0.0213902	0.446,0.374,0.653	0.847,0.859,0.769	-0.334	33.4
83611	ENSG00000263551	RP11-78F17.1	18	+	1133842	1133894	976589	976895	1159178	1159398	83611	1,1,4	0,2,0	1,1,0	0,2,3	191	139	7.26997e-05	0.00482318	1.0,0.267,1.0	1.0,0.267,0.0	0.333	33.3
19907	ENSG00000044115	CTNNA1	5	+	138759261	138759389	138758051	138758177	138781922	138782029	19907	0,0,1	2,2,0	0,2,2	1,0,0	267	139	9.07556e-05	0.00571649	0.0,0.0,1.0	0.0,1.0,1.0	-0.333	33.3
37591	ENSG00000120254	MTHFD1L	6	+	150867377	150867582	150866556	150866635	150876089	150876174	37591	4,2,1	2,1,2	1,0,0	6,7,2	344	139	0.000153629	0.00846553	0.447,0.447,0.168	0.063,0.0,0.0	0.333	33.3
119974	ENSG00000214922	HLA-F-AS1	6	-	29744949	29745008	29741687	29741855	29745472	29745727	119974	2,0,1	0,1,0	1,0,0	0,4,2	198	139	0.000285982	0.0133329	1.0,0.0,1.0	1.0,0.0,0.0	0.333	33.3
78891	ENSG00000181031	RPH3AL	17	-	281767	281850	219622	219736	319419	319549	78891	3,0,1	0,1,0	0,3,0	4,0,1	222	139	0.000377641	0.016261	1.0,0.0,1.0	0.0,1.0,0.0	0.333	33.3
54048	ENSG00000273432	RP5-1165K10.2	7	-	44014605	44014779	44013592	44013679	44016433	44016523	54048	45,28,26	3,3,0	13,24,10	2,7,9	313	139	0.000409692	0.0172596	0.869,0.806,1.0	0.743,0.604,0.33	0.333	33.3
135552	ENSG00000170802	FOXN2	2	+	48328560	48328702	48314709	48314814	48346200	48346751	135552	15,29,18	3,21,5	11,8,6	13,26,6	281	139	0.000585978	0.0223351	0.712,0.406,0.64	0.295,0.132,0.331	0.333	33.3
49728	ENSG00000182552	RWDD4	4	-	183646350	183646397	183640728	183641468	183646487	183646537	49728	7,3,1	0,1,0	6,2,0	2,0,5	186	139	0.000781008	0.027548	1.0,0.692,1.0	0.692,1.0,0.0	0.333	33.3
82948	ENSG00000172508	CARNS1	11	+	67416102	67416202	67415677	67415763	67418755	67419243	82948	2,0,2	0,2,0	0,0,1	1,1,0	239	139	0.00180279	0.0492625	1.0,0.0,1.0	0.0,0.0,1.0	0.333	33.3
81311	ENSG00000141380	SS18	18	-	26084051	26084175	26082362	26082528	26087500	26087577	81311	7,8,5	1,1,0	5,4,9	1,6,3	263	139	0.000227766	0.0112982	0.787,0.809,1.0	0.725,0.261,0.613	0.332	33.2
103808	ENSG00000233098	CCDC144NL-AS1	17	+	20887591	20887849	20868546	20868685	20892229	20892432	103808	17,13,19	3,11,11	0,2,2	3,3,4	397	139	0.000606756	0.0228585	0.665,0.293,0.377	0.0,0.189,0.149	0.332	33.2
75660	ENSG00000125319	C17orf53	17	+	44152636	44152777	44150960	44151044	44154555	44154664	75660	19,9,15	2,0,0	9,16,8	2,6,3	280	139	2.93078e-05	0.00246096	0.825,1.0,1.0	0.691,0.57,0.57	0.331	33.1
116202	ENSG00000111237	VPS29	12	-	110499534	110499546	110496011	110496094	110502048	110502099	116202	10,10,1	0,0,0	5,2,8	5,1,1	151	139	3.6133e-05	0.00287281	1.0,1.0,1.0	0.479,0.648,0.88	0.331	33.1
144209	ENSG00000177675	CD163L1	12	-	7367235	7367344	7357379	7357486	7368086	7368197	144209	13,21,11	6,2,4	7,15,7	0,0,0	248	139	1.34476e-07	3.46789e-05	0.548,0.855,0.607	1.0,1.0,1.0	-0.33	33
123599	ENSG00000229267	AC072062.1	2	+	214947824	214947947	214833988	214834105	214960392	214960590	123599	3,7,2	3,6,3	0,0,0	2,2,1	262	139	8.08703e-07	0.000149904	0.347,0.382,0.261	0.0,0.0,0.0	0.33	33
941	ENSG00000213185	FAM24B	10	-	122850388	122850550	122849077	122849439	122855644	122855786	941	39,49,30	5,11,8	16,18,12	17,9,12	301	139	5.21694e-05	0.00375191	0.783,0.673,0.634	0.303,0.48,0.316	0.33	33
34892	ENSG00000258458	CTD-2555K7.2	14	-	22764461	22764657	22764122	22764242	22766423	22766530	34892	6,6,3	2,3,0	4,6,4	0,0,0	335	139	0.000926269	0.030951	0.555,0.454,1.0	1.0,1.0,1.0	-0.33	33
94817	ENSG00000127540	UQCR11	19	-	1602293	1602426	1599987	1600098	1605359	1605443	94817	29,38,18	1,1,1	8,15,12	2,9,3	272	139	3.65326e-06	0.000489485	0.937,0.951,0.902	0.671,0.46,0.671	0.329	32.9
32455	ENSG00000262879	RP11-156P1.3	17	-	47072471	47072559	47056608	47056753	47099834	47100248	32455	42,27,20	15,19,4	15,28,9	25,25,24	227	139	0.000445348	0.0182881	0.632,0.465,0.754	0.269,0.407,0.187	0.329	32.9
26916	ENSG00000204650	CRHR1-IT1	17	+	45639371	45639520	45629903	45630158	45645900	45646008	26916	13,13,8	6,7,2	2,7,5	12,13,4	288	139	0.0010949	0.0347043	0.511,0.473,0.659	0.074,0.206,0.376	0.329	32.9
23678	ENSG00000148153	INIP	9	-	112701787	112701880	112700701	112700923	112716460	112716541	23678	5,3,4	1,5,0	5,2,1	0,0,0	232	139	0.00118554	0.0366478	0.75,0.264,1.0	1.0,1.0,1.0	-0.329	32.9
30260	ENSG00000115687	PASK	2	-	241124119	241124133	241122731	241122899	241126195	241127451	30260	4,9,4	6,5,3	21,16,17	3,4,2	153	139	0.00156469	0.0446423	0.377,0.621,0.548	0.864,0.784,0.885	-0.329	32.9
37409	ENSG00000088854	C20orf194	20	-	3307520	3307640	3304439	3304543	3315032	3315120	37409	6,3,7	9,2,10	0,0,0	5,3,4	259	139	3.36812e-07	7.27108e-05	0.264,0.446,0.273	0.0,0.0,0.0	0.328	32.8
132859	ENSG00000248498	ASNSP1	8	-	46591336	46591508	46579212	46579551	46593463	46593586	132859	18,13,8	16,6,4	2,3,4	7,15,13	311	139	1.16332e-05	0.00121216	0.335,0.492,0.472	0.113,0.082,0.121	0.328	32.8
141355	ENSG00000005379	BZRAP1	17	-	58324249	58324494	58323467	58323545	58324810	58325002	141355	0,3,3	6,5,0	2,8,10	1,1,0	384	139	0.000117707	0.00696564	0.0,0.178,1.0	0.42,0.743,1.0	-0.328	32.8
106545	ENSG00000179406	LINC00174	7	-	66382701	66382912	66382418	66382427	66390081	66390250	106545	32,26,26	0,0,0	13,9,6	0,4,2	350	139	0.00021134	0.0106916	1.0,1.0,1.0	1.0,0.472,0.544	0.328	32.8
54054	ENSG00000273432	RP5-1165K10.2	7	-	43969731	43969861	43966263	43966395	43972629	43972691	54054	23,28,15	17,22,11	3,0,1	8,10,6	269	139	5.73361e-07	0.00011183	0.411,0.397,0.413	0.162,0.0,0.079	0.327	32.7
93084	ENSG00000111879	FAM184A	6	-	118960768	118960863	118959921	118960184	118961760	118961963	93084	6,9,2	14,8,2	0,0,0	13,8,5	234	139	3.02633e-08	9.79125e-06	0.203,0.401,0.373	0.0,0.0,0.0	0.326	32.6
87394	ENSG00000198157	HMGN5	X	-	81118729	81118753	81118431	81118485	81121534	81121683	87394	12,8,4	0,1,0	7,15,8	4,4,6	163	139	2.89186e-06	0.000405784	1.0,0.872,1.0	0.599,0.762,0.532	0.326	32.6
128421	ENSG00000146909	NOM1	7	+	156952470	156952585	156949722	156950724	156954102	156954303	128421	4,2,7	4,0,5	5,3,6	0,0,1	254	139	4.17317e-05	0.00319909	0.354,1.0,0.434	1.0,1.0,0.767	-0.326	32.6
10807	ENSG00000101546	RBFA	18	+	80038529	80038617	80037329	80037506	80044211	80044285	10807	5,3,3	1,0,5	3,3,16	0,0,0	227	139	0.00114315	0.0357747	0.754,1.0,0.269	1.0,1.0,1.0	-0.326	32.6
145359	ENSG00000127129	EDN2	1	-	41481094	41481193	41479126	41479502	41482465	41482588	145359	4,8,3	0,0,0	14,13,6	4,3,2	238	139	3.16561e-06	0.000436482	1.0,1.0,1.0	0.671,0.717,0.637	0.325	32.5
127216	ENSG00000110768	GTF2H1	11	+	18324235	18324296	18322566	18322740	18325946	18326153	127216	1,4,3	4,6,2	0,0,0	7,3,2	200	139	6.2155e-06	0.000748941	0.148,0.317,0.51	0.0,0.0,0.0	0.325	32.5
101517	ENSG00000179818	PCBP1-AS1	2	-	70059642	70059680	70055713	70055910	70085546	70085624	101517	10,18,12	6,6,3	9,11,17	0,0,0	177	139	2.38628e-08	7.86495e-06	0.567,0.702,0.759	1.0,1.0,1.0	-0.324	32.4
79913	ENSG00000075826	SEC31B	10	-	100498704	100498804	100498028	100498207	100499159	100499258	79913	6,9,0	0,4,6	2,4,2	0,0,1	239	139	0.000163462	0.00882355	1.0,0.567,0.0	1.0,1.0,0.538	-0.324	32.4
129483	ENSG00000203485	INF2	14	+	104715280	104715340	104714202	104714856	104718794	104719603	129483	27,29,10	8,9,4	23,24,32	0,0,0	199	139	1.51053e-10	9.85177e-08	0.702,0.692,0.636	1.0,1.0,1.0	-0.323	32.3
83406	ENSG00000177842	ZNF620	3	+	40508655	40508774	40506303	40506376	40511469	40511596	83406	8,5,6	12,4,6	0,0,1	4,20,11	258	139	8.45049e-09	3.22498e-06	0.264,0.402,0.35	0.0,0.0,0.047	0.323	32.3
101611	ENSG00000179818	PCBP1-AS1	2	-	70053730	70053815	70051202	70051305	70055713	70055910	101611	3,2,4	2,5,4	0,1,0	2,6,4	224	139	3.46296e-05	0.00277729	0.482,0.199,0.383	0.0,0.094,0.0	0.323	32.3
54168	ENSG00000148057	IDNK	9	+	83628108	83628211	83623165	83623221	83641547	83641591	54168	4,0,4	2,6,3	0,0,0	1,5,3	242	139	6.62561e-05	0.00447763	0.535,0.0,0.434	0.0,0.0,0.0	0.323	32.3
85313	ENSG00000141959	PFKL	21	+	44305852	44305935	44304274	44304455	44306680	44306754	85313	4,6,3	0,0,0	6,12,15	2,6,2	222	139	4.51529e-07	9.30747e-05	1.0,1.0,1.0	0.653,0.556,0.824	0.322	32.2
87812	ENSG00000163354	DCST2	1	-	155031573	155031767	155026547	155026715	155032666	155032768	87812	18,18,15	0,0,1	5,6,4	4,2,0	333	139	0.000170996	0.00911292	1.0,1.0,0.862	0.343,0.556,1.0	0.321	32.1
143919	ENSG00000184207	PGP	16	-	2213013	2213091	2212261	2212847	2213580	2213899	143919	7,4,5	3,2,6	1,2,0	1,7,2	217	139	0.00131403	0.0395935	0.599,0.562,0.348	0.39,0.155,0.0	0.321	32.1
137580	ENSG00000001631	KRIT1	7	-	92245426	92245595	92244901	92245018	92245789	92245920	137580	18,19,19	0,0,0	10,11,12	3,2,2	308	139	1.12245e-05	0.00118257	1.0,1.0,1.0	0.601,0.713,0.73	0.319	31.9
27755	ENSG00000159753	RLTPR	16	+	67656833	67656881	67656423	67656645	67657238	67657316	27755	0,1,0	5,10,1	1,3,5	1,8,6	187	139	2.63116e-05	0.00226808	0.0,0.069,0.0	0.426,0.218,0.382	-0.319	31.9
61701	ENSG00000261971	MMP25-AS1	16	-	3058539	3058702	3055735	3055945	3058995	3059085	61701	30,42,19	2,0,1	15,30,5	0,12,6	302	139	0.000374048	0.0161793	0.873,1.0,0.897	1.0,0.535,0.277	0.319	31.9
14005	ENSG00000118193	KIF14	1	-	200619551	200619674	200617611	200618838	200620410	200620734	14005	24,33,11	7,6,7	17,7,9	11,12,19	262	139	0.00083065	0.0287456	0.645,0.745,0.455	0.451,0.236,0.201	0.319	31.9
81441	ENSG00000196873	CBWD3	9	+	68270301	68270518	68268933	68268978	68274881	68274938	81441	2,9,4	2,7,2	2,0,0	7,12,5	356	139	8.8329e-07	0.00015895	0.281,0.334,0.438	0.1,0.0,0.0	0.318	31.8
21591	ENSG00000120662	MTRF1	13	-	41261655	41261825	41260492	41260915	41263484	41263538	21591	9,8,2	5,7,2	1,2,1	11,13,10	309	139	1.69546e-06	0.000270718	0.447,0.34,0.31	0.039,0.065,0.043	0.317	31.7
68010	ENSG00000132182	NUP210	3	-	13345050	13345186	13344860	13344975	13347089	13347254	68010	2,11,10	4,1,2	3,7,5	0,0,1	275	139	6.6024e-05	0.00446439	0.202,0.848,0.716	1.0,1.0,0.716	-0.317	31.7
37856	ENSG00000186166	CCDC84	11	+	119001612	119001825	118999010	118999166	119010763	119010830	37856	41,24,35	2,2,0	10,10,6	6,2,1	352	139	0.000382375	0.0164288	0.89,0.826,1.0	0.397,0.664,0.703	0.317	31.7
16643	ENSG00000106479	ZNF862	7	+	149841515	149841711	149838374	149838461	149844624	149844736	16643	48,53,36	19,12,8	9,14,13	6,20,16	335	139	1.43376e-05	0.00142184	0.512,0.647,0.651	0.384,0.225,0.252	0.316	31.6
31154	ENSG00000087586	AURKA	20	-	56388686	56388784	56388155	56388202	56392153	56392215	31154	50,38,35	23,4,22	17,25,20	35,27,20	237	139	0.000594547	0.0225432	0.56,0.848,0.483	0.222,0.352,0.37	0.316	31.6
124107	ENSG00000164308	ERAP2	5	+	96909579	96909809	96908960	96909117	96912636	96912798	124107	1,5,3	0,1,0	3,7,4	3,0,2	369	139	0.000651148	0.0241109	1.0,0.653,1.0	0.274,1.0,0.43	0.316	31.6
51167	ENSG00000112984	KIF20A	5	+	138186301	138186516	138185960	138186052	138187095	138187243	51167	4,11,1	0,0,0	8,6,2	2,3,0	354	139	0.000951635	0.0314238	1.0,1.0,1.0	0.611,0.44,1.0	0.316	31.6
26011	ENSG00000181894	ZNF329	19	-	58143104	58143198	58142556	58142661	58150751	58150778	26011	14,14,16	0,0,1	10,15,26	8,1,9	233	139	1.96747e-06	0.000301646	1.0,1.0,0.905	0.427,0.899,0.633	0.315	31.5
720	ENSG00000177479	ARIH2	3	+	48944981	48945181	48922747	48922811	48961611	48961679	720	43,42,39	8,0,1	36,23,30	6,13,10	339	139	0.000454514	0.018558	0.688,1.0,0.941	0.711,0.42,0.552	0.315	31.5
75779	ENSG00000198794	SCAMP5	15	+	75016592	75016749	75012676	75012805	75017869	75017971	75779	18,25,25	11,16,5	13,5,2	8,15,20	296	139	0.000828161	0.0286917	0.435,0.423,0.701	0.433,0.135,0.045	0.315	31.5
89547	ENSG00000281566	RP11-485F13.1	X	+	98730518	98730568	98644527	98644574	98731530	98731577	89547	5,7,1	3,8,3	2,0,0	6,5,9	189	139	3.15883e-05	0.00260281	0.551,0.392,0.197	0.197,0.0,0.0	0.314	31.4
90593	ENSG00000225470	JPX	X	+	73998767	73998844	73944342	73944465	73999354	73999503	90593	11,8,2	2,1,5	8,14,5	0,0,1	216	139	5.83879e-05	0.00407184	0.78,0.837,0.205	1.0,1.0,0.763	-0.314	31.4
124280	ENSG00000105793	GTPBP10	7	+	90355172	90355230	90354457	90354549	90374301	90374354	124280	3,3,1	5,7,1	0,0,0	1,1,6	197	139	8.38544e-05	0.00536681	0.297,0.232,0.414	0.0,0.0,0.0	0.314	31.4
9126	ENSG00000122008	POLK	5	+	75568676	75568790	75552471	75552591	75569424	75569492	9126	6,11,6	2,3,1	2,2,3	0,0,0	253	139	0.00012251	0.00716388	0.622,0.668,0.767	1.0,1.0,1.0	-0.314	31.4
130190	ENSG00000197619	ZNF615	19	-	52004416	52004723	52003686	52003900	52008140	52008201	130190	6,11,12	5,6,3	1,4,0	6,5,4	446	139	0.000257431	0.0123378	0.272,0.364,0.555	0.049,0.2,0.0	0.314	31.4
141322	ENSG00000250903	GMDS-AS1	6	+	2263600	2263684	2248836	2248926	2283498	2283773	141322	5,21,14	0,3,0	16,10,6	3,3,5	223	139	0.00095118	0.0314238	1.0,0.814,1.0	0.769,0.675,0.428	0.314	31.4
103649	ENSG00000163535	SGOL2	2	+	200531775	200531901	200526135	200526252	200532302	200532355	103649	2,2,1	0,0,3	0,1,1	3,2,0	265	139	0.00112378	0.03532	1.0,1.0,0.149	0.0,0.208,1.0	0.314	31.4
16021	ENSG00000106080	FKBP14	7	-	30020212	30020304	30018995	30019123	30022664	30022816	16021	31,42,21	16,23,26	8,11,8	29,27,38	231	139	2.3529e-07	5.42122e-05	0.538,0.524,0.327	0.142,0.197,0.112	0.313	31.3
56658	ENSG00000160072	ATAD3B	1	+	1477750	1477939	1477273	1477350	1478643	1478745	56658	43,56,45	5,12,10	28,41,25	28,16,20	328	139	4.68977e-05	0.00348459	0.785,0.664,0.656	0.298,0.521,0.346	0.313	31.3
132846	ENSG00000248498	ASNSP1	8	-	46592057	46592209	46580081	46580237	46593454	46593586	132846	14,9,16	10,3,8	5,2,2	5,9,7	291	139	0.00106055	0.0339391	0.401,0.589,0.489	0.323,0.096,0.12	0.313	31.3
27997	ENSG00000065600	TMEM206	1	-	212385276	212385425	212379894	212380037	212410424	212410521	27997	8,13,6	3,2,1	5,5,3	0,0,0	288	139	0.000136839	0.00778031	0.563,0.758,0.743	1.0,1.0,1.0	-0.312	31.2
103855	ENSG00000162415	ZSWIM5	1	-	45034311	45034558	45020624	45020788	45035687	45035823	103855	8,10,6	0,3,2	6,7,6	0,0,0	386	139	0.00177022	0.048599	1.0,0.546,0.519	1.0,1.0,1.0	-0.312	31.2
83747	ENSG00000151914	DST	6	-	56468981	56468999	56466077	56466195	56469882	56469957	83747	17,17,18	13,3,7	15,17,21	0,0,0	157	139	2.30168e-09	1.0829e-06	0.537,0.834,0.695	1.0,1.0,1.0	-0.311	31.1
85297	ENSG00000141959	PFKL	21	+	44305187	44305417	44304274	44304455	44306680	44306754	85297	20,19,25	0,0,0	32,15,14	2,6,2	369	139	4.06408e-07	8.50537e-05	1.0,1.0,1.0	0.858,0.485,0.725	0.311	31.1
80129	ENSG00000183621	ZNF438	10	-	30923286	30923415	30908932	30909015	30941574	30941651	80129	3,3,4	5,2,6	0,0,0	9,5,13	268	139	7.66947e-07	0.000143459	0.237,0.438,0.257	0.0,0.0,0.0	0.311	31.1
58205	ENSG00000143393	PI4KB	1	-	151326171	151326328	151307573	151307801	151327270	151327715	58205	19,18,5	8,0,2	18,18,12	0,0,0	296	139	7.53927e-06	0.000878759	0.527,1.0,0.54	1.0,1.0,1.0	-0.311	31.1
28343	ENSG00000033100	CHPF2	7	+	151236407	151236510	151235450	151235628	151237373	151237593	28343	2,4,1	3,3,2	0,0,0	3,1,4	242	139	4.05769e-05	0.00312463	0.277,0.434,0.223	0.0,0.0,0.0	0.311	31.1
8309	ENSG00000138867	GUCD1	22	-	24543821	24543954	24542397	24543097	24546913	24547005	8309	7,4,3	0,0,1	7,2,5	1,5,1	272	139	5.50968e-05	0.00390956	1.0,1.0,0.605	0.782,0.17,0.719	0.311	31.1
120092	ENSG00000250802	ZBED3-AS1	5	+	77100235	77100391	77098654	77098747	77105655	77105808	120092	29,36,21	1,1,2	7,10,7	3,5,1	295	139	0.000439191	0.0181366	0.932,0.944,0.832	0.524,0.485,0.767	0.311	31.1
101458	ENSG00000145819	ARHGAP26	5	+	143208503	143208692	143207443	143207473	143213996	143214088	101458	7,4,8	6,7,5	0,0,0	2,10,2	328	139	7.30976e-08	2.09061e-05	0.331,0.195,0.404	0.0,0.0,0.0	0.31	31
90892	ENSG00000215908	CROCCP2	1	-	16642766	16642850	16633094	16633346	16643027	16643145	90892	21,9,13	7,5,1	6,6,8	0,0,0	223	139	3.22886e-07	7.00724e-05	0.652,0.529,0.89	1.0,1.0,1.0	-0.31	31
78276	ENSG00000187325	TAF9B	X	-	78137961	78138026	78137748	78137883	78138842	78138924	78276	49,57,41	24,43,42	39,34,34	3,7,9	204	139	4.79385e-06	0.000611721	0.582,0.475,0.399	0.899,0.768,0.72	-0.31	31
89785	ENSG00000162572	SCNN1D	1	+	1281225	1281297	1280435	1280666	1281410	1281610	89785	20,3,4	3,3,1	6,10,9	0,1,0	211	139	5.4071e-05	0.00385492	0.815,0.397,0.725	1.0,0.868,1.0	-0.31	31
120091	ENSG00000250802	ZBED3-AS1	5	+	77134304	77134585	77118319	77118521	77139260	77139511	120091	6,2,3	13,26,2	6,8,5	3,4,1	420	139	0.000367091	0.0159388	0.133,0.025,0.332	0.398,0.398,0.623	-0.31	31
126755	ENSG00000135409	AMHR2	12	+	53429830	53429978	53429452	53429645	53430145	53430282	126755	6,5,5	1,5,0	4,4,15	0,0,0	287	139	0.000717531	0.0259074	0.744,0.326,1.0	1.0,1.0,1.0	-0.31	31
89094	ENSG00000099622	CIRBP	19	+	1264252	1264463	1261381	1261641	1270927	1271029	89094	24,48,49	7,6,3	15,13,14	6,9,8	350	139	0.000799498	0.0279683	0.577,0.761,0.866	0.498,0.365,0.41	0.31	31
31156	ENSG00000087586	AURKA	20	-	56388686	56388784	56388155	56388202	56392167	56392196	31156	49,40,36	27,31,16	16,26,21	71,45,44	237	139	4.98449e-09	2.10419e-06	0.516,0.431,0.569	0.117,0.253,0.219	0.309	30.9
52142	ENSG00000119048	UBE2B	5	+	134388976	134389052	134388547	134388588	134390224	134390321	52142	4,8,5	2,5,0	4,10,6	0,0,0	215	139	4.7059e-05	0.00349149	0.564,0.508,1.0	1.0,1.0,1.0	-0.309	30.9
33452	ENSG00000236947	RP11-98G7.1	1	-	156455627	156455721	156446411	156446573	156456352	156456577	33452	25,18,6	2,0,0	5,13,5	1,5,2	233	139	7.10993e-05	0.00473484	0.882,1.0,1.0	0.749,0.608,0.599	0.309	30.9
92157	ENSG00000214022	REPIN1	7	+	150369670	150369697	150368799	150368941	150370759	150370884	92157	25,21,27	8,26,17	61,53,19	14,5,1	166	139	7.23448e-05	0.00480222	0.724,0.403,0.571	0.785,0.899,0.941	-0.309	30.9
140568	ENSG00000115998	C2orf42	2	-	70190475	70190715	70182794	70182935	70190972	70191002	140568	12,13,7	0,3,3	3,7,5	0,0,0	379	139	0.000198292	0.0101973	1.0,0.614,0.461	1.0,1.0,1.0	-0.308	30.8
25363	ENSG00000186866	POFUT2	21	-	45285268	45285328	45282348	45282459	45285677	45285928	25363	0,1,0	5,4,4	3,2,1	2,2,4	199	139	0.000547407	0.0212929	0.0,0.149,0.0	0.512,0.411,0.149	-0.308	30.8
92731	ENSG00000183018	SPNS2	17	+	4536262	4536426	4536075	4536174	4536899	4536946	92731	7,5,6	1,5,0	6,5,9	0,0,0	303	139	0.000815999	0.02835	0.763,0.314,1.0	1.0,1.0,1.0	-0.308	30.8
122832	ENSG00000197381	ADARB1	21	+	45116972	45117038	45073852	45073903	45118563	45118619	122832	5,12,5	0,10,2	2,1,6	0,0,0	205	139	4.24025e-06	0.000552518	1.0,0.449,0.629	1.0,1.0,1.0	-0.307	30.7
140522	ENSG00000150776	C11orf57	11	+	112074886	112074916	112074315	112074358	112075566	112075643	140522	32,36,29	23,29,9	17,12,27	41,36,37	169	139	6.26323e-05	0.00429633	0.534,0.505,0.726	0.254,0.215,0.375	0.307	30.7
3972	ENSG00000254518	RP11-347H15.4	11	+	50303132	50303242	50298578	50298917	50304580	50304656	3972	6,4,2	1,5,2	2,1,3	0,1,0	249	139	0.000147819	0.00825238	0.77,0.309,0.358	1.0,0.358,1.0	-0.307	30.7
1492	ENSG00000204576	PRR3	6	+	30561309	30561541	30558149	30558212	30561833	30562124	1492	21,29,27	1,4,3	31,34,22	14,11,9	371	139	0.000388708	0.0166182	0.887,0.731,0.771	0.453,0.537,0.478	0.307	30.7
97494	ENSG00000168528	SERINC2	1	+	31415085	31415280	31413812	31414777	31423692	31423854	97494	12,4,10	1,0,0	7,2,3	1,0,6	334	139	0.00085907	0.0294644	0.833,1.0,1.0	0.744,1.0,0.172	0.306	30.6
27566	ENSG00000119242	CCDC92	12	-	123944668	123944740	123944271	123944364	123945703	123945800	27566	4,13,6	1,0,7	5,6,2	0,0,0	211	139	0.000205738	0.0105013	0.725,1.0,0.361	1.0,1.0,1.0	-0.305	30.5
86214	ENSG00000162999	DUSP19	2	+	183087039	183087192	183083507	183083554	183095430	183100005	86214	10,24,14	4,1,4	14,15,11	0,0,0	292	139	1.90489e-06	0.000293338	0.543,0.92,0.625	1.0,1.0,1.0	-0.304	30.4
32809	ENSG00000155542	SETD9	5	+	56911168	56911502	56909623	56909743	56913010	56913116	32809	63,103,72	6,7,3	44,48,33	16,14,7	473	139	4.10161e-06	0.000537294	0.755,0.812,0.876	0.447,0.502,0.581	0.304	30.4
119975	ENSG00000214922	HLA-F-AS1	6	-	29747147	29747261	29726600	29727139	29748899	29748993	119975	1,4,3	5,7,1	0,1,0	11,11,8	253	139	0.000186953	0.00976998	0.099,0.239,0.622	0.0,0.048,0.0	0.304	30.4
118592	ENSG00000160124	CCDC58	3	-	122366335	122366467	122365578	122365633	122368175	122368322	118592	1,5,2	1,1,4	1,0,1	2,1,3	271	139	0.00118565	0.0366478	0.339,0.719,0.204	0.204,0.0,0.146	0.304	30.4
137856	ENSG00000088727	KIF9	3	-	47280951	47281192	47277281	47277375	47282139	47282198	137856	23,26,6	0,0,2	13,7,9	4,1,6	380	139	8.16289e-05	0.00527366	1.0,1.0,0.523	0.543,0.719,0.354	0.302	30.2
144058	ENSG00000137404	NRM	6	-	30689275	30689452	30688046	30688942	30690841	30690967	144058	22,21,18	3,1,0	40,47,46	11,11,21	316	139	0.000109254	0.00657586	0.763,0.902,1.0	0.615,0.653,0.491	0.302	30.2
18038	ENSG00000170919	TPT1-AS1	13	+	45344304	45344446	45341512	45341614	45369958	45370330	18038	13,6,6	1,0,10	5,8,3	0,0,0	281	139	0.000376195	0.0162243	0.865,1.0,0.229	1.0,1.0,1.0	-0.302	30.2
91361	ENSG00000197601	FAR1	11	+	13714975	13715145	13712965	13713033	13721729	13721859	91361	7,10,8	1,2,2	1,2,2	0,0,0	309	139	0.000996327	0.0324562	0.759,0.692,0.643	1.0,1.0,1.0	-0.302	30.2
129508	ENSG00000143486	EIF2D	1	-	206599462	206599476	206599002	206599092	206600262	206603501	129508	21,23,21	6,17,10	14,30,17	0,4,0	153	139	1.70951e-06	0.000271555	0.761,0.551,0.656	1.0,0.872,1.0	-0.301	30.1
59726	ENSG00000182796	TMEM198B	12	+	55831256	55831349	55830853	55831083	55832958	55833125	59726	13,6,8	5,3,5	6,2,6	0,1,0	232	139	2.67775e-05	0.00229891	0.609,0.545,0.489	1.0,0.545,1.0	-0.301	30.1
27737	ENSG00000196724	ZNF418	19	-	57932432	57932646	57930427	57930554	57933816	57933902	27737	10,9,10	1,5,4	4,3,7	1,0,0	353	139	6.37526e-05	0.0043562	0.797,0.415,0.496	0.612,1.0,1.0	-0.301	30.1
32512	ENSG00000164855	TMEM184A	7	-	1549819	1549885	1548518	1548688	1550122	1550198	32512	8,3,2	0,0,0	3,2,8	0,1,5	205	139	0.000717987	0.0259163	1.0,1.0,1.0	1.0,0.576,0.52	0.301	30.1
608	ENSG00000140374	ETFA	15	-	76243169	76243267	76215354	76216597	76274411	76274494	608	3,6,2	0,0,1	2,6,0	0,2,3	237	139	0.00150176	0.0433685	1.0,1.0,0.54	1.0,0.638,0.0	0.301	30.1
3105	ENSG00000196511	TPK1	7	-	144591422	144591569	144548490	144548602	144623165	144623261	3105	6,2,7	0,0,0	4,13,4	1,8,0	286	139	1.63337e-05	0.00157175	1.0,1.0,1.0	0.66,0.441,1.0	0.3	30
19719	ENSG00000125877	ITPA	20	+	3213318	3213426	3213168	3213226	3213984	3214126	19719	49,87,46	35,34,21	56,72,68	12,6,5	247	139	4.46102e-07	9.211e-05	0.441,0.59,0.552	0.724,0.871,0.884	-0.299	29.9
125936	ENSG00000139531	SUOX	12	+	55999332	55999458	55997295	55997339	56002211	56002271	125936	27,34,14	3,2,3	31,19,33	16,15,10	265	139	0.000140263	0.00793112	0.825,0.899,0.71	0.504,0.399,0.634	0.299	29.9
20120	ENSG00000108654	DDX5	17	-	64501260	64501374	64501056	64501143	64502009	64502069	20120	23,15,12	11,5,8	6,7,6	6,16,17	253	139	0.000252102	0.0121962	0.535,0.622,0.452	0.355,0.194,0.162	0.299	29.9
56660	ENSG00000160072	ATAD3B	1	+	1477750	1477848	1477273	1477350	1478643	1478745	56660	26,32,19	5,12,10	15,21,16	28,16,20	237	139	0.0003513	0.0155209	0.753,0.61,0.527	0.239,0.435,0.319	0.299	29.9
61823	ENSG00000152117	AC093838.4	2	+	131511714	131511896	131508536	131508608	131515601	131515747	61823	35,33,16	4,6,4	13,9,10	8,5,7	321	139	0.000913467	0.0306312	0.791,0.704,0.634	0.413,0.438,0.382	0.299	29.9
63237	ENSG00000185761	ADAMTSL5	19	-	1508442	1508570	1507997	1508109	1510149	1510258	63237	9,5,6	4,2,0	2,1,3	0,0,0	267	139	0.000263722	0.0125466	0.539,0.566,1.0	1.0,1.0,1.0	-0.298	29.8
112772	ENSG00000076685	NT5C2	10	-	103105357	103105381	103101044	103101102	103105705	103105801	112772	10,9,5	7,4,5	8,1,3	0,0,2	163	139	0.00056695	0.0218326	0.549,0.657,0.46	1.0,1.0,0.561	-0.298	29.8
26664	ENSG00000137210	TMEM14B	6	+	10827696	10827824	10751132	10751234	10829006	10829186	26664	3,1,9	3,7,1	0,0,2	4,9,2	267	139	0.000671082	0.0246491	0.342,0.069,0.824	0.0,0.0,0.342	0.298	29.8
25687	ENSG00000163393	SLC22A15	1	+	116027115	116027216	116026892	116027022	116031365	116031581	25687	5,6,1	4,6,5	0,0,0	3,1,1	240	139	1.38399e-06	0.00022992	0.42,0.367,0.104	0.0,0.0,0.0	0.297	29.7
55907	ENSG00000120549	KIAA1217	10	+	24542692	24542770	24536773	24536893	24544980	24545268	55907	15,18,13	1,0,0	12,8,9	0,4,7	217	139	1.84375e-05	0.00172282	0.906,1.0,1.0	1.0,0.562,0.452	0.297	29.7
79207	ENSG00000215386	MIR99AHG	21	+	16579727	16579909	16537378	16537439	16589352	16589540	79207	0,1,0	13,9,6	1,2,6	5,1,4	321	139	3.81292e-05	0.00298417	0.0,0.046,0.0	0.08,0.464,0.394	-0.297	29.7
37020	ENSG00000143575	HAX1	1	+	154273773	154273803	154272667	154272776	154274949	154275001	37020	1,5,1	5,3,4	0,0,0	4,7,1	169	139	0.000116166	0.00689762	0.141,0.578,0.171	0.0,0.0,0.0	0.297	29.7
87814	ENSG00000163354	DCST2	1	-	155031573	155031781	155026547	155026715	155032666	155032768	87814	21,18,14	0,0,1	7,6,6	4,2,0	347	139	0.000228121	0.0113112	1.0,1.0,0.849	0.412,0.546,1.0	0.297	29.7
47667	ENSG00000133816	MICAL2	11	+	12255642	12255750	12249940	12250273	12256784	12256968	47667	0,0,2	2,1,0	2,1,2	1,1,0	247	139	0.000428933	0.0178726	0.0,0.0,1.0	0.53,0.36,1.0	-0.297	29.7
85159	ENSG00000262728	RP11-1000B6.8	15	-	32597638	32597745	32586104	32586260	32603106	32603203	85159	4,1,2	2,1,7	2,0,0	7,2,1	246	139	0.00126156	0.0383878	0.531,0.361,0.139	0.139,0.0,0.0	0.297	29.7
141446	ENSG00000088367	EPB41L1	20	+	36121659	36121816	36112425	36112480	36173883	36173954	141446	3,14,5	0,2,0	17,17,5	1,4,5	296	139	0.0014243	0.041862	1.0,0.767,1.0	0.889,0.666,0.32	0.297	29.7
75181	ENSG00000167766	ZNF83	19	-	52616717	52616815	52614617	52614797	52618935	52619062	75181	41,47,35	20,14,14	22,19,12	22,35,16	237	139	3.1933e-06	0.000439318	0.546,0.663,0.595	0.37,0.241,0.305	0.296	29.6
17334	ENSG00000245958	RP11-33B1.1	4	+	119475081	119475185	119462895	119462979	119488644	119488717	17334	0,0,0	9,5,7	1,8,2	7,4,3	243	139	4.18935e-06	0.000547043	0.0,0.0,0.0	0.076,0.534,0.276	-0.295	29.5
80122	ENSG00000183621	ZNF438	10	-	30910359	30910440	30908932	30909015	30941574	30941651	80122	2,2,4	5,2,6	0,0,0	9,5,13	220	139	1.03361e-05	0.00111275	0.202,0.387,0.296	0.0,0.0,0.0	0.295	29.5
121420	ENSG00000148840	PPRC1	10	+	102145019	102145090	102144249	102144307	102148371	102148521	121420	21,30,21	4,3,1	24,23,22	7,13,17	210	139	9.82892e-05	0.00605185	0.777,0.869,0.933	0.694,0.539,0.461	0.295	29.5
36147	ENSG00000132424	PNISR	6	-	99403828	99403978	99402539	99402710	99404602	99404702	36147	69,87,56	12,15,6	15,29,19	14,9,11	289	139	0.000249664	0.0121306	0.734,0.736,0.818	0.34,0.608,0.454	0.295	29.5
81973	ENSG00000107281	NPDC1	9	-	137040511	137040737	137040356	137040436	137041061	137041134	81973	3,6,9	3,1,1	8,9,6	0,2,0	365	139	0.000804412	0.028074	0.276,0.696,0.774	1.0,0.631,1.0	-0.295	29.5
38886	ENSG00000162804	SNED1	2	+	241044419	241044530	241037239	241037353	241048314	241048440	38886	10,5,7	0,0,0	5,7,9	0,4,3	250	139	2.34765e-05	0.00206264	1.0,1.0,1.0	1.0,0.493,0.625	0.294	29.4
22666	ENSG00000165983	PTER	10	+	16467131	16467210	16437356	16437490	16484336	16484816	22666	26,29,26	27,19,6	18,18,10	25,41,27	218	139	0.000814134	0.0283091	0.38,0.493,0.734	0.315,0.219,0.191	0.294	29.4
83689	ENSG00000175322	ZNF519	18	-	14080188	14080266	14078199	14078298	14084876	14085076	83689	0,3,4	3,5,1	1,0,0	5,4,1	217	139	0.00153228	0.0439765	0.0,0.278,0.719	0.114,0.0,0.0	0.294	29.4
57714	ENSG00000121310	ECHDC2	1	-	52905033	52906611	52904645	52904833	52907867	52907954	57714	165515101196	15,12,14	405423327	23,22,17	1717	139	1.33227e-15	2.34607e-12	0.899,0.911,0.874	0.588,0.609,0.609	0.293	29.3
57917	ENSG00000152795	HNRNPDL	4	-	82425565	82425667	82422563	82424883	82426036	82426121	57917	223132170	108,143,90	84,95,55	224207186	241	139	1.42297e-12	1.49919e-09	0.544,0.347,0.521	0.178,0.209,0.146	0.293	29.3
8933	ENSG00000170390	DCLK2	4	+	150253473	150253666	150249564	150249684	150256019	150257438	8933	4,8,6	14,3,4	0,1,1	4,5,6	332	139	4.92479e-05	0.00360918	0.107,0.528,0.386	0.0,0.077,0.065	0.293	29.3
18045	ENSG00000170919	TPT1-AS1	13	+	45344328	45344446	45341512	45341614	45369958	45370507	18045	13,7,6	1,0,10	4,11,3	0,0,0	257	139	0.000434308	0.0180278	0.875,1.0,0.245	1.0,1.0,1.0	-0.293	29.3
5577	ENSG00000124635	HIST1H2BJ	6	-	27127263	27127401	27125896	27126462	27132366	27132750	5577	84,63,72	34,22,33	11,32,21	28,37,22	277	139	4.76209e-07	9.68662e-05	0.554,0.59,0.523	0.165,0.303,0.324	0.292	29.2
8832	ENSG00000167419	LPO	17	+	58243998	58244081	58242977	58243055	58247477	58247638	8832	14,4,4	8,9,5	0,0,4	9,16,10	222	139	3.34906e-05	0.00271286	0.523,0.218,0.334	0.0,0.0,0.2	0.292	29.2
62550	ENSG00000119640	ACYP1	14	-	75056446	75056560	75053220	75053659	75063953	75064049	62550	6,7,5	0,6,1	3,2,3	0,0,0	253	139	0.00020105	0.0103219	1.0,0.391,0.733	1.0,1.0,1.0	-0.292	29.2
75588	ENSG00000132471	WBP2	17	-	75852655	75852820	75849603	75849739	75855238	75855309	75588	3,6,5	4,4,2	2,0,4	4,16,12	304	139	0.000565885	0.021812	0.255,0.407,0.533	0.186,0.0,0.132	0.292	29.2
110508	ENSG00000214826	DDX12P	12	-	9431378	9431423	9430587	9430740	9432365	9432574	110508	0,0,0	10,9,8	3,2,1	2,5,6	184	139	0.000962573	0.0316494	0.0,0.0,0.0	0.531,0.232,0.112	-0.292	29.2
11361	ENSG00000163138	PACRGL	4	+	20709682	20709773	20704659	20704814	20712787	20712922	11361	17,22,7	9,10,6	18,29,14	4,3,2	230	139	0.00112279	0.0352978	0.533,0.571,0.414	0.731,0.854,0.809	-0.292	29.2
125030	ENSG00000266338	NBPF15	1	-	144448226	144448450	144440140	144440295	144448774	144448916	125030	36,24,25	14,20,17	8,8,4	28,21,20	363	139	3.30121e-08	1.04879e-05	0.496,0.315,0.36	0.099,0.127,0.071	0.291	29.1
12164	ENSG00000187239	FNBP1	9	-	129923843	129923939	129919018	129919242	129924959	129925157	12164	4,1,1	3,0,2	2,5,1	1,0,0	235	139	0.000875512	0.0298291	0.441,1.0,0.228	0.542,1.0,1.0	-0.291	29.1
45150	ENSG00000128739	SNRPN	15	+	24959372	24959465	24920472	24920547	24962113	24962209	45150	0,0,0	2,3,2	9,4,4	7,11,7	232	139	1.18942e-06	0.000202789	0.0,0.0,0.0	0.435,0.179,0.255	-0.29	29
8936	ENSG00000170390	DCLK2	4	+	150253473	150253664	150249567	150249684	150256019	150257457	8936	5,7,6	14,3,4	0,1,1	4,5,6	330	139	3.98757e-05	0.00308952	0.131,0.496,0.387	0.0,0.078,0.066	0.29	29
98418	ENSG00000178234	GALNT11	7	+	152079564	152079669	152079286	152079408	152094189	152094522	98418	3,8,5	4,4,6	2,4,2	16,19,9	244	139	0.000471624	0.0190984	0.299,0.533,0.322	0.066,0.107,0.112	0.29	29
116370	ENSG00000262468	LINC01569	16	-	4248251	4248483	4246988	4247061	4253646	4253789	116370	9,21,7	4,6,4	3,1,4	4,6,4	371	139	0.00150197	0.0433685	0.457,0.567,0.396	0.219,0.059,0.273	0.29	29
78471	ENSG00000269893	SNHG8	4	+	118279106	118279137	118278754	118278792	118279388	118279431	78471	257282179	77,73,81	94116100	139,114,96	170	139	5.82867e-14	7.89542e-11	0.732,0.76,0.644	0.356,0.454,0.46	0.289	28.9
97588	ENSG00000151693	ASAP2	2	+	9391066	9391196	9388293	9388546	9393481	9393647	97588	15,25,14	17,15,6	3,2,14	24,28,13	269	139	0.000135075	0.00769779	0.313,0.463,0.547	0.061,0.036,0.358	0.289	28.9
61984	ENSG00000145362	ANK2	4	+	113374763	113374946	113373316	113373449	113381456	113383732	61984	4,5,1	3,2,0	7,6,6	1,0,0	322	139	0.0005649	0.0217877	0.365,0.519,1.0	0.751,1.0,1.0	-0.289	28.9
12728	ENSG00000125648	SLC25A23	19	-	6438723	6438843	6438446	6438534	6444150	6444301	12728	9,6,1	6,2,2	2,4,0	17,4,11	259	139	0.00118996	0.0367349	0.446,0.617,0.212	0.059,0.349,0.0	0.289	28.9
5441	ENSG00000153006	SREK1IP1	5	-	64765044	64765121	64754577	64754770	64768504	64768627	5441	11,13,3	0,2,4	7,3,3	0,0,0	216	139	0.00134045	0.0401539	1.0,0.807,0.326	1.0,1.0,1.0	-0.289	28.9
71898	ENSG00000101363	MANBAL	20	+	37297346	37297534	37289662	37289686	37298762	37298879	71898	104,77,77	1,3,7	36,82,41	19,9,11	327	139	1.18711e-05	0.00122761	0.978,0.916,0.824	0.446,0.795,0.613	0.288	28.8
89097	ENSG00000099622	CIRBP	19	+	1264252	1264472	1261820	1262143	1270927	1271036	89097	27,46,43	2,1,0	26,27,12	9,1,5	359	139	5.15595e-05	0.00371889	0.839,0.947,1.0	0.528,0.913,0.482	0.288	28.8
56605	ENSG00000264538	SUZ12P1	17	+	30734864	30735097	30731885	30732123	30743300	30743369	56605	11,15,15	1,1,0	9,12,7	3,2,2	372	139	0.0004006	0.017022	0.804,0.849,1.0	0.529,0.692,0.567	0.288	28.8
36641	ENSG00000123473	STIL	1	-	47313846	47313929	47312947	47313021	47314035	47314147	36641	1,0,1	3,3,2	2,6,1	4,2,1	222	139	0.000516911	0.0204151	0.173,0.0,0.238	0.238,0.653,0.385	-0.288	28.8
120283	ENSG00000142765	SYTL1	1	+	27349971	27350192	27349397	27349765	27350388	27350485	120283	187,169,94	48,46,37	88,62,61	87,58,71	360	139	2.95763e-13	3.47218e-10	0.601,0.587,0.495	0.281,0.292,0.249	0.287	28.7
96537	ENSG00000138162	TACC2	10	+	122224231	122224430	122216626	122216921	122224725	122224787	96537	4,3,4	2,3,4	2,0,0	4,8,4	338	139	5.67355e-05	0.00398445	0.451,0.291,0.291	0.171,0.0,0.0	0.287	28.7
35813	ENSG00000111271	ACAD10	12	+	111710114	111710353	111709525	111709684	111715820	111715962	35813	8,9,2	2,7,13	0,0,1	1,2,3	378	139	0.000114774	0.00683801	0.595,0.321,0.054	0.0,0.0,0.109	0.287	28.7
100862	ENSG00000114867	EIF4G1	3	+	184316048	184316218	184315762	184315856	184317716	184317786	100862	5,9,5	1,5,0	5,16,7	0,0,0	309	139	0.000431729	0.0179427	0.692,0.447,1.0	1.0,1.0,1.0	-0.287	28.7
59606	ENSG00000185513	L3MBTL1	20	+	43530797	43530889	43530283	43530419	43532772	43532924	59606	1,0,6	1,4,1	3,6,1	1,0,1	231	139	0.000960567	0.0316003	0.376,0.0,0.783	0.644,1.0,0.376	-0.287	28.7
80041	ENSG00000164162	ANAPC10	4	-	145064571	145064654	144995454	144995603	145081659	145081750	80041	51,54,26	21,11,8	19,18,21	15,24,19	222	139	3.61702e-05	0.00287281	0.603,0.755,0.671	0.442,0.32,0.409	0.286	28.6
137850	ENSG00000088727	KIF9	3	-	47280951	47281195	47277281	47277375	47282139	47282359	137850	23,30,9	0,0,2	15,9,12	4,1,6	383	139	5.54798e-05	0.00392135	1.0,1.0,0.62	0.576,0.766,0.421	0.286	28.6
9175	ENSG00000173599	PC	11	-	66954248	66954436	66952429	66952468	66957868	66957996	9175	7,4,5	0,1,0	7,7,7	2,4,1	327	139	9.67153e-05	0.00597884	1.0,0.63,1.0	0.598,0.427,0.748	0.286	28.6
28091	ENSG00000167515	TRAPPC2L	16	+	88859361	88859443	88858618	88858789	88859572	88859750	28091	2,5,1	1,0,1	6,0,2	1,4,3	221	139	0.00127038	0.038599	0.557,1.0,0.386	0.791,0.0,0.295	0.286	28.6
90626	ENSG00000225470	JPX	X	+	73994863	73994961	73944583	73944662	73998953	73999368	90626	1,1,7	1,10,1	1,0,0	1,1,4	237	139	0.00146105	0.0426138	0.37,0.055,0.804	0.37,0.0,0.0	0.286	28.6
124105	ENSG00000164308	ERAP2	5	+	96909579	96909764	96908960	96909117	96912636	96912798	124105	1,6,5	0,1,0	3,8,6	3,0,2	324	139	0.00152285	0.0438284	1.0,0.72,1.0	0.3,1.0,0.563	0.286	28.6
57920	ENSG00000152795	HNRNPDL	4	-	82425562	82425794	82424628	82424883	82426036	82426129	57920	251275227	108,143,90	112123106	224207186	371	139	0	0	0.465,0.419,0.486	0.158,0.182,0.176	0.285	28.5
78277	ENSG00000187325	TAF9B	X	-	78137961	78138055	78137748	78137883	78138842	78138924	78277	81,99,66	24,43,42	57,66,68	3,7,9	233	139	8.40804e-08	2.33958e-05	0.668,0.579,0.484	0.919,0.849,0.818	-0.285	28.5
112362	ENSG00000164118	CEP44	4	+	174316529	174316567	174316165	174316290	174317334	174320331	112362	24,21,16	9,17,5	16,18,11	2,2,0	177	139	7.23359e-05	0.00480222	0.677,0.492,0.715	0.863,0.876,1.0	-0.285	28.5
78873	ENSG00000166153	DEPDC4	12	-	100263496	100263692	100262263	100262409	100266919	100267079	78873	41,37,19	1,2,0	17,45,36	11,2,7	335	139	0.000152778	0.00843371	0.944,0.885,1.0	0.391,0.903,0.681	0.285	28.5
74429	ENSG00000180902	D2HGDH	2	+	241749298	241749399	241748835	241748942	241750150	241750294	74429	9,9,8	16,13,3	2,1,2	9,20,7	240	139	0.000160745	0.00873655	0.246,0.286,0.607	0.114,0.028,0.142	0.285	28.5
43444	ENSG00000226002	GTF2IP14	7	+	65087114	65087246	65084102	65084257	65087752	65087825	43444	10,5,6	4,1,6	5,6,6	1,1,0	271	139	0.000375803	0.0162243	0.562,0.719,0.339	0.719,0.755,1.0	-0.285	28.5
35841	ENSG00000111271	ACAD10	12	+	111710272	111710437	111709525	111709684	111712497	111712657	35841	22,33,25	21,19,10	14,9,16	31,43,31	304	139	1.24052e-06	0.000209761	0.324,0.443,0.533	0.171,0.087,0.191	0.284	28.4
41048	ENSG00000269533	AC003002.6	19	+	57417911	57418034	57413595	57413636	57419634	57419994	41048	22,14,18	0,0,0	11,13,12	0,6,4	262	139	1.61894e-06	0.000260184	1.0,1.0,1.0	1.0,0.535,0.614	0.284	28.4
76372	ENSG00000214021	TTLL3	3	+	9818554	9818920	9817644	9817759	9820545	9820779	76372	54,32,27	1,12,2	15,11,7	0,0,0	505	139	2.60359e-06	0.000374927	0.937,0.423,0.788	1.0,1.0,1.0	-0.284	28.4
71908	ENSG00000101363	MANBAL	20	+	37297295	37297534	37289662	37289686	37298762	37298879	71908	130,89,81	1,3,7	43,98,45	19,9,11	378	139	1.36019e-05	0.00135982	0.98,0.916,0.81	0.454,0.8,0.601	0.284	28.4
43445	ENSG00000226002	GTF2IP14	7	+	65087118	65087246	65084102	65084257	65087752	65087825	43445	18,4,6	4,1,6	7,7,10	1,1,0	267	139	0.000253721	0.0122456	0.701,0.676,0.342	0.785,0.785,1.0	-0.284	28.4
138757	ENSG00000101452	DHX35	20	+	39025229	39025359	39021872	39021935	39030703	39030775	138757	2,2,1	2,0,3	1,2,2	1,0,0	269	139	0.000429992	0.0178946	0.341,1.0,0.147	0.341,1.0,1.0	-0.284	28.4
30669	ENSG00000123106	CCDC91	12	+	28259363	28259442	28190445	28190641	28450160	28450253	30669	0,1,1	2,0,1	1,2,3	2,0,0	218	139	0.00111544	0.0351295	0.0,1.0,0.389	0.242,1.0,1.0	-0.284	28.4
76082	ENSG00000126453	BCL2L12	19	+	49666996	49667161	49666684	49666799	49673697	49673915	76082	20,36,18	7,5,3	30,35,24	0,0,1	304	139	2.03176e-07	4.85367e-05	0.566,0.767,0.733	1.0,1.0,0.916	-0.283	28.3
73231	ENSG00000171045	TSNARE1	8	-	142274780	142274863	142271566	142271691	142279859	142279997	73231	6,11,9	1,2,4	11,5,8	0,0,0	222	139	2.19278e-05	0.0019601	0.79,0.775,0.585	1.0,1.0,1.0	-0.283	28.3
82148	ENSG00000254840	RP11-574M7.1	11	+	50320366	50320506	50315414	50315596	50320913	50320998	82148	4,3,8	5,5,2	0,0,1	1,2,1	279	139	8.32106e-05	0.00534225	0.285,0.23,0.666	0.0,0.0,0.333	0.283	28.3
90342	ENSG00000145041	VPRBP	3	-	51466798	51466876	51463113	51463227	51470928	51471005	90342	27,18,19	14,9,5	24,27,25	3,1,2	217	139	2.9076e-05	0.00244649	0.553,0.562,0.709	0.837,0.945,0.889	-0.282	28.2
141092	ENSG00000078687	TNRC6C	17	+	78009574	78009697	78005055	78005079	78012002	78012060	141092	0,0,0	6,17,7	1,2,6	6,6,2	262	139	5.8463e-05	0.00407381	0.0,0.0,0.0	0.081,0.15,0.614	-0.282	28.2
117474	ENSG00000142186	SCYL1	11	+	65538175	65538288	65537808	65537880	65538441	65538701	117474	2,0,2	0,1,0	1,0,1	0,2,3	252	139	8.98411e-05	0.00567532	1.0,0.0,1.0	1.0,0.0,0.155	0.282	28.2
28797	ENSG00000163870	TPRA1	3	-	127584315	127584445	127580021	127580163	127594799	127594933	28797	25,26,16	17,20,5	9,14,8	14,24,28	269	139	0.000222399	0.0111035	0.432,0.402,0.623	0.249,0.232,0.129	0.282	28.2
98871	ENSG00000197172	MAGEA6	X	-	152769218	152769277	152767795	152767861	152769653	152769677	98871	8,6,8	5,2,4	4,5,11	0,2,0	198	139	0.000289716	0.0134662	0.529,0.678,0.584	1.0,0.637,1.0	-0.282	28.2
106385	ENSG00000106462	EZH2	7	-	148826453	148826500	148819595	148819687	148827163	148827266	106385	5,3,4	1,3,4	2,11,2	0,1,1	186	139	0.000507594	0.0201513	0.789,0.428,0.428	1.0,0.892,0.599	-0.282	28.2
80761	ENSG00000187695	RP11-723O4.6	3	-	128970368	128970502	128969310	128969404	128971286	128971330	80761	1,2,13	3,9,3	0,0,1	2,3,5	273	139	0.000139999	0.00791979	0.145,0.102,0.688	0.0,0.0,0.092	0.281	28.1
140521	ENSG00000150776	C11orf57	11	+	112074853	112074916	112074315	112074358	112075566	112075684	140521	47,51,46	23,29,9	22,30,41	41,36,37	202	139	0.000154061	0.00847936	0.584,0.548,0.779	0.27,0.364,0.433	0.281	28.1
94290	ENSG00000148985	PGAP2	11	+	3823612	3823740	3811249	3811424	3824269	3824364	94290	4,0,0	12,16,8	1,13,7	5,4,10	267	139	0.000257306	0.0123366	0.148,0.0,0.0	0.094,0.629,0.267	-0.281	28.1
95169	ENSG00000138073	PREB	2	-	27133487	27133654	27133123	27133337	27134286	27134361	95169	6,9,5	5,1,0	1,7,4	0,0,0	306	139	0.00091149	0.0305982	0.353,0.803,1.0	1.0,1.0,1.0	-0.281	28.1
104881	ENSG00000177565	TBL1XR1	3	-	177131362	177131449	177053787	177053918	177197120	177197251	104881	4,15,7	1,2,0	10,10,6	3,7,3	226	139	0.00132472	0.039855	0.711,0.822,1.0	0.672,0.468,0.552	0.28	28
37849	ENSG00000204685	STARD7-AS1	2	+	96237904	96238099	96208415	96208979	96239712	96240688	37849	32,14,13	0,1,0	13,11,20	5,3,1	334	139	1.36289e-05	0.00136079	1.0,0.854,1.0	0.52,0.604,0.893	0.279	27.9
130203	ENSG00000197619	ZNF615	19	-	52004416	52004849	52003848	52003900	52008140	52008201	130203	9,14,12	5,6,3	1,6,1	6,5,4	572	139	0.000868118	0.0296756	0.304,0.362,0.493	0.039,0.226,0.057	0.279	27.9
95421	ENSG00000234684	SDCBP2-AS1	20	+	1350359	1350481	1325420	1325529	1359698	1359820	95421	2,4,7	1,6,0	9,3,8	0,1,0	261	139	0.000970386	0.0318129	0.516,0.262,1.0	1.0,0.615,1.0	-0.279	27.9
10590	ENSG00000106290	TAF6	7	-	100115845	100115943	100114228	100114268	100116513	100116612	10590	0,5,4	5,0,0	0,1,1	4,0,3	237	139	0.00101743	0.032926	0.0,1.0,1.0	0.0,1.0,0.164	0.279	27.9
68468	ENSG00000197119	SLC25A29	14	-	100295819	100296006	100293293	100293377	100298841	100298885	68468	62,66,41	32,48,32	18,11,20	48,52,62	326	139	6.35048e-14	8.41725e-11	0.452,0.37,0.353	0.138,0.083,0.121	0.278	27.8
24182	ENSG00000167751	KLK2	19	+	50874720	50874966	50873432	50873519	50876471	50876758	24182	66,50,33	26,18,9	16,25,22	29,21,24	385	139	2.68578e-06	0.000384516	0.478,0.501,0.57	0.166,0.301,0.249	0.278	27.8
116544	ENSG00000168259	DNAJC7	17	-	42003358	42003557	42000481	42000570	42018437	42018518	116544	20,22,5	4,2,1	2,2,13	0,0,0	338	139	4.29729e-05	0.00327186	0.673,0.819,0.673	1.0,1.0,1.0	-0.278	27.8
133385	ENSG00000088448	ANKRD10	13	-	110900529	110900694	110893196	110893263	110906032	110906124	133385	34,41,33	8,30,21	10,16,16	23,22,27	304	139	0.000242593	0.0118524	0.66,0.385,0.418	0.166,0.25,0.213	0.278	27.8
66885	ENSG00000122420	PTGFR	1	+	78532212	78532353	78497873	78497944	78536405	78537010	66885	9,10,12	9,14,5	0,0,7	9,17,8	280	139	0.000326903	0.0147067	0.332,0.262,0.544	0.0,0.0,0.303	0.278	27.8
11483	ENSG00000129566	TEP1	14	-	20389641	20389740	20389237	20389297	20390680	20390758	11483	5,10,12	4,2,0	11,11,6	0,0,0	238	139	0.000734247	0.0263029	0.422,0.745,1.0	1.0,1.0,1.0	-0.278	27.8
35864	ENSG00000111271	ACAD10	12	+	111710272	111710353	111709525	111709684	111712497	111712657	35864	22,23,21	21,19,10	11,16,12	31,43,31	220	139	1.17272e-05	0.0012199	0.398,0.433,0.57	0.183,0.19,0.197	0.277	27.7
97528	ENSG00000165458	INPPL1	11	+	72228657	72228847	72228347	72228498	72229464	72229584	97528	29,32,11	0,0,0	10,19,12	1,2,4	329	139	2.24598e-05	0.00199464	1.0,1.0,1.0	0.809,0.801,0.559	0.277	27.7
87621	ENSG00000164548	TRA2A	7	-	23522120	23522432	23521706	23521840	23531788	23531980	87621	294235170	114110115	78,92,53	184183205	451	139	0	0	0.443,0.397,0.313	0.116,0.134,0.074	0.276	27.6
79476	ENSG00000205581	HMGN1	21	-	39345829	39347292	39345145	39345274	39347378	39347483	79476	11031128883	55,72,40	300325253	49,45,49	1602	139	3.65263e-14	5.11647e-11	0.635,0.576,0.657	0.347,0.385,0.309	0.276	27.6
112513	ENSG00000073169	SELO	22	+	50204918	50205024	50200978	50201590	50206316	50206520	112513	56,66,55	30,24,16	29,36,36	39,48,36	245	139	5.19619e-07	0.000103812	0.514,0.609,0.661	0.297,0.298,0.362	0.276	27.6
84537	ENSG00000163681	SLMAP	3	+	57864806	57864857	57864547	57864716	57890045	57890098	84537	10,18,8	3,2,4	10,23,16	0,0,0	190	139	1.94271e-06	0.000298594	0.709,0.868,0.594	1.0,1.0,1.0	-0.276	27.6
80031	ENSG00000164162	ANAPC10	4	-	145064571	145064689	144995454	144995603	145081659	145081750	80031	79,80,50	21,11,8	27,35,32	15,24,19	257	139	5.28052e-06	0.000660826	0.67,0.797,0.772	0.493,0.441,0.477	0.276	27.6
48596	ENSG00000175063	UBE2C	20	+	45815540	45815655	45813436	45813464	45815853	45815913	48596	16,14,12	0,2,1	22,18,14	7,4,8	254	139	0.000221508	0.0110679	1.0,0.793,0.868	0.632,0.711,0.489	0.276	27.6
12777	ENSG00000146463	ZMYM4	1	+	35295926	35295988	35269032	35269094	35325359	35325405	12777	14,14,12	2,6,10	14,13,6	1,2,0	201	139	0.000638857	0.02377	0.829,0.617,0.454	0.906,0.818,1.0	-0.275	27.5
48036	ENSG00000154710	RABGEF1	7	+	66796775	66796892	66775226	66775393	66797373	66797506	48036	2,2,2	1,0,0	10,5,1	0,2,4	256	139	0.00110336	0.0348828	0.521,1.0,1.0	1.0,0.576,0.12	0.275	27.5
124395	ENSG00000151338	MIPOL1	14	+	37212229	37212356	37198027	37198104	37219552	37219645	124395	12,9,11	14,4,9	2,10,7	13,20,24	266	139	0.0011483	0.0358893	0.309,0.54,0.39	0.074,0.207,0.132	0.275	27.5
96776	ENSG00000273611	ZNHIT3	17	+	36492817	36492899	36486934	36486966	36495222	36495822	96776	4,5,3	1,0,0	2,4,5	1,5,0	221	139	0.00158137	0.044918	0.716,1.0,1.0	0.557,0.335,1.0	0.275	27.5
12971	ENSG00000157693	C9orf91	9	+	114622302	114622500	114617117	114617301	114624135	114624459	12971	9,12,8	10,9,8	1,5,0	24,24,16	337	139	6.30258e-09	2.51204e-06	0.271,0.355,0.292	0.017,0.079,0.0	0.274	27.4
90346	ENSG00000145041	VPRBP	3	-	51466805	51466876	51463113	51463227	51470928	51471005	90346	29,18,17	14,9,5	22,21,27	3,1,2	210	139	4.85629e-05	0.00356746	0.578,0.57,0.692	0.829,0.933,0.899	-0.274	27.4
144562	ENSG00000188070	C11orf95	11	-	63764037	63764598	63759891	63763869	63764867	63765254	144562	42,26,12	1,0,0	28,28,22	3,0,6	700	139	6.66707e-05	0.00449825	0.893,1.0,1.0	0.65,1.0,0.421	0.274	27.4
19995	ENSG00000198690	FAN1	15	+	30905740	30905906	30904509	30904590	30908117	30908258	19995	22,31,18	5,4,7	20,25,18	16,19,11	305	139	0.00116957	0.0363514	0.667,0.779,0.54	0.363,0.375,0.427	0.274	27.4
75169	ENSG00000167766	ZNF83	19	-	52616717	52616841	52614689	52614797	52618935	52619062	75169	50,65,44	20,14,14	32,27,17	22,35,16	263	139	2.00657e-05	0.00182947	0.569,0.71,0.624	0.435,0.29,0.36	0.273	27.3
105824	ENSG00000230189	GS1-124K5.2	7	-	66427948	66428040	66411614	66411702	66450070	66450236	105824	13,7,9	2,2,6	10,11,2	0,2,0	231	139	0.000517401	0.0204156	0.796,0.678,0.474	1.0,0.768,1.0	-0.273	27.3
69056	ENSG00000099251	HSD17B7P2	10	+	38365909	38366011	38365433	38365629	38369952	38370009	69056	14,16,16	21,15,8	1,2,1	6,6,4	241	139	0.000797666	0.0279511	0.278,0.381,0.536	0.088,0.161,0.126	0.273	27.3
25688	ENSG00000163393	SLC22A15	1	+	116027115	116027216	116026892	116027022	116031402	116031890	25688	7,1,2	4,4,5	0,0,0	1,1,1	240	139	9.18647e-06	0.00101651	0.503,0.126,0.188	0.0,0.0,0.0	0.272	27.2
107964	ENSG00000239523	MYLK-AS1	3	+	123612238	123612318	123611234	123611355	123629490	123629681	107964	5,9,7	4,2,1	7,13,2	1,0,0	219	139	1.59138e-05	0.00153614	0.442,0.741,0.816	0.816,1.0,1.0	-0.272	27.2
138976	ENSG00000125814	NAPB	20	-	23397071	23397188	23395138	23395185	23402992	23403072	138976	44,26,31	2,1,1	19,27,27	9,9,3	256	139	2.28645e-05	0.00202183	0.923,0.934,0.944	0.534,0.62,0.83	0.272	27.2
63599	ENSG00000183431	SF3A3	1	-	37978719	37978827	37969570	37969735	37979464	37979533	63599	1,6,1	8,3,2	0,0,0	4,10,15	247	139	0.000123141	0.00719397	0.066,0.53,0.22	0.0,0.0,0.0	0.272	27.2
123836	ENSG00000138380	CARF	2	+	202941859	202941980	202917876	202918043	202952558	202952679	123836	21,7,9	1,1,0	11,4,9	4,1,3	260	139	0.000161644	0.00876224	0.918,0.789,1.0	0.595,0.681,0.616	0.272	27.2
113578	ENSG00000106070	GRB10	7	-	50757061	50757209	50755891	50756056	50779134	50779162	113578	2,12,2	3,6,2	0,2,3	11,8,9	287	139	0.00026244	0.0125001	0.244,0.492,0.326	0.0,0.108,0.139	0.272	27.2
103451	ENSG00000187860	CCDC157	22	+	30375485	30375663	30373850	30374091	30376258	30376347	103451	17,6,8	2,4,0	6,9,4	0,0,0	317	139	0.000572131	0.0219567	0.788,0.397,1.0	1.0,1.0,1.0	-0.272	27.2
131937	ENSG00000152127	MGAT5	2	+	134190106	134190248	134120181	134120291	134254264	134254606	131937	8,4,1	3,6,4	1,0,1	20,24,5	281	139	3.61494e-06	0.000487531	0.569,0.248,0.11	0.024,0.0,0.09	0.271	27.1
120054	ENSG00000250802	ZBED3-AS1	5	+	77098654	77098747	77092491	77092533	77105655	77105689	120054	12,7,11	4,3,2	7,10,1	1,0,0	232	139	6.85068e-05	0.00459947	0.643,0.583,0.767	0.807,1.0,1.0	-0.271	27.1
98599	ENSG00000101104	PABPC1L	20	+	44932341	44932432	44930459	44930726	44933056	44933185	98599	35,35,16	30,24,10	8,2,1	9,6,13	230	139	0.00115735	0.0360826	0.414,0.468,0.492	0.349,0.168,0.044	0.271	27.1
93565	ENSG00000197555	SIPA1L1	14	+	71650289	71650508	71624047	71624236	71658332	71658436	93565	39,23,18	5,1,6	13,28,18	0,0,0	358	139	4.76209e-07	9.68662e-05	0.752,0.899,0.538	1.0,1.0,1.0	-0.27	27
117158	ENSG00000176595	KBTBD11	8	+	1998800	1998946	1973877	1973935	2000284	2006936	117158	2,3,3	2,8,3	0,0,0	5,3,3	285	139	4.56071e-05	0.00342074	0.328,0.155,0.328	0.0,0.0,0.0	0.27	27
28204	ENSG00000162591	MEGF6	1	-	3499137	3499266	3498697	3498826	3499587	3499716	28204	1,15,7	1,1,0	2,3,10	3,2,2	268	139	0.000924625	0.0309381	0.342,0.886,1.0	0.257,0.438,0.722	0.27	27
12931	ENSG00000141446	ESCO1	18	-	21539919	21540025	21536041	21536185	21560858	21560990	12931	41,40,25	5,3,2	22,22,19	11,3,14	245	139	0.000935854	0.0311195	0.823,0.883,0.876	0.532,0.806,0.435	0.27	27
64784	ENSG00000186153	WWOX	16	+	78117213	78117414	78114975	78115154	78118954	78119076	64784	1,2,6	9,3,2	0,0,0	5,8,6	340	139	0.000100755	0.0061759	0.043,0.214,0.551	0.0,0.0,0.0	0.269	26.9
111317	ENSG00000171302	CANT1	17	-	79000099	79000265	78998147	78998286	79009663	79009817	111317	51,48,29	22,21,5	24,23,16	16,27,21	305	139	0.00103377	0.0333149	0.514,0.51,0.726	0.406,0.28,0.258	0.269	26.9
47454	ENSG00000010318	PHF7	3	+	52422759	52422881	52421647	52421754	52423090	52423640	47454	11,17,11	4,2,4	12,12,8	0,0,1	261	139	1.88236e-05	0.00174524	0.594,0.819,0.594	1.0,1.0,0.81	-0.268	26.8
105010	ENSG00000138942	RNF185	22	+	31196935	31197157	31160182	31160303	31201497	31201615	105010	15,3,12	5,1,1	3,6,4	0,1,0	361	139	2.4037e-05	0.00209991	0.536,0.536,0.822	1.0,0.698,1.0	-0.268	26.8
87817	ENSG00000163354	DCST2	1	-	155031573	155031745	155026547	155026715	155032666	155032768	87817	11,13,13	0,0,1	5,10,3	4,2,0	311	139	0.000394466	0.0168251	1.0,1.0,0.853	0.358,0.691,1.0	0.268	26.8
34583	ENSG00000164024	METAP1	4	+	99037869	99037941	99036042	99036089	99039373	99039446	34583	6,2,0	1,2,2	5,5,0	0,0,1	211	139	0.000943485	0.0312552	0.798,0.397,0.0	1.0,1.0,0.0	-0.268	26.8
46108	ENSG00000142733	MAP3K6	1	-	27364660	27364684	27364203	27364394	27364772	27364912	46108	3,4,4	39,28,16	13,20,19	18,31,23	163	139	2.8556e-07	6.35381e-05	0.062,0.109,0.176	0.381,0.355,0.413	-0.267	26.7
72953	ENSG00000118412	CASP8AP2	6	+	89846561	89846644	89829899	89830067	89853165	89853234	72953	12,18,18	3,3,5	5,8,4	0,0,0	222	139	2.75831e-06	0.000391264	0.715,0.79,0.693	1.0,1.0,1.0	-0.267	26.7
143001	ENSG00000138835	RGS3	9	+	113582169	113582242	113536795	113536918	113583449	113584427	143001	27,18,13	35,11,31	5,4,8	31,40,42	212	139	5.17595e-06	0.000651045	0.336,0.518,0.216	0.096,0.062,0.111	0.267	26.7
66232	ENSG00000117362	APH1A	1	-	150267956	150267991	150267355	150267478	150268697	150269015	66232	10,5,5	1,3,4	8,15,4	0,0,1	174	139	2.507e-05	0.00218088	0.889,0.571,0.5	1.0,1.0,0.762	-0.267	26.7
84935	ENSG00000161249	DMKN	19	-	35509910	35509961	35505717	35505765	35510183	35510252	84935	33,38,20	20,17,19	38,55,29	9,6,6	190	139	3.98091e-05	0.0030882	0.547,0.621,0.435	0.755,0.87,0.78	-0.267	26.7
34652	ENSG00000197275	RAD54B	8	-	94432610	94432656	94411120	94411315	94458267	94458436	34652	12,8,12	27,8,14	5,9,1	42,36,24	185	139	3.98831e-05	0.00308952	0.25,0.429,0.392	0.082,0.158,0.03	0.267	26.7
51042	ENSG00000126522	ASL	7	+	66086584	66086786	66075883	66076093	66088806	66088921	51042	12,8,8	2,7,0	3,12,5	0,1,0	341	139	0.000166091	0.00891317	0.71,0.318,1.0	1.0,0.83,1.0	-0.267	26.7
62575	ENSG00000169375	SIN3A	15	-	75436345	75436443	75430186	75430408	75455787	75455840	62575	2,2,7	0,1,0	2,4,4	2,4,0	237	139	0.000570369	0.0219275	1.0,0.54,1.0	0.37,0.37,1.0	0.267	26.7
12926	ENSG00000141446	ESCO1	18	-	21539919	21540021	21536041	21536185	21560858	21560990	12926	41,39,25	5,3,2	22,22,19	11,3,14	241	139	0.00098589	0.0321816	0.825,0.882,0.878	0.536,0.809,0.439	0.267	26.7
130368	ENSG00000265843	LINC01029	18	-	77989818	77989914	77982519	77982713	77993634	77993698	130368	23,26,30	0,0,0	25,23,25	10,4,3	235	139	1.59499e-08	5.51523e-06	1.0,1.0,1.0	0.597,0.773,0.831	0.266	26.6
94953	ENSG00000106603	COA1	7	-	43637489	43637657	43631567	43631782	43639448	43639655	94953	3,4,5	6,5,3	2,0,0	10,16,11	307	139	3.99579e-06	0.000527354	0.185,0.266,0.43	0.083,0.0,0.0	0.266	26.6
35835	ENSG00000111271	ACAD10	12	+	111710272	111710365	111709525	111709684	111712497	111712657	35835	25,27,28	21,19,10	14,22,18	31,43,31	232	139	8.49682e-05	0.00542964	0.416,0.46,0.627	0.213,0.235,0.258	0.266	26.6
100658	ENSG00000124356	STAMBP	2	+	73829404	73829510	73828966	73828996	73830844	73831059	100658	49,40,18	14,9,12	20,17,11	21,18,12	245	139	0.000717027	0.0259074	0.665,0.716,0.46	0.351,0.349,0.342	0.266	26.6
126527	ENSG00000143774	GUK1	1	+	228146757	228146938	228146025	228146067	228147614	228147754	126527	18,11,11	0,0,0	6,5,14	5,0,1	320	139	0.00149009	0.0431474	1.0,1.0,1.0	0.343,1.0,0.859	0.266	26.6
61663	ENSG00000139436	GIT2	12	-	109951166	109951346	109939164	109939247	109953091	109953234	61663	6,9,3	2,0,0	7,4,8	7,0,4	319	139	0.00173085	0.0478592	0.567,1.0,1.0	0.303,1.0,0.466	0.266	26.6
75175	ENSG00000167766	ZNF83	19	-	52616717	52616875	52614664	52614797	52618935	52619062	75175	56,72,51	20,14,14	38,35,18	22,35,16	297	139	2.94187e-05	0.00246859	0.567,0.706,0.63	0.447,0.319,0.345	0.264	26.4
32952	ENSG00000198837	DENND4B	1	-	153942186	153942356	153941373	153941440	153942877	153943130	32952	19,12,9	2,2,2	19,10,12	0,0,0	309	139	0.000326525	0.014695	0.81,0.73,0.669	1.0,1.0,1.0	-0.264	26.4
47978	ENSG00000142676	RPL11	1	+	23694630	23694788	23693810	23693913	23695797	23696128	47978	5,3,2	4,2,0	4,9,7	0,1,1	297	139	0.000386459	0.0165587	0.369,0.412,1.0	1.0,0.808,0.766	-0.264	26.4
123600	ENSG00000229267	AC072062.1	2	+	214947824	214947947	214833988	214834105	214961809	214963274	123600	3,7,2	5,9,2	1,1,0	9,14,10	262	139	6.53084e-06	0.00077932	0.241,0.292,0.347	0.056,0.037,0.0	0.262	26.2
57694	ENSG00000121310	ECHDC2	1	-	52912753	52912951	52911722	52912021	52913894	52914095	57694	32,34,27	16,20,10	22,13,5	19,23,20	337	139	0.000174261	0.00923896	0.452,0.412,0.527	0.323,0.189,0.093	0.262	26.2
52914	ENSG00000100263	RHBDD3	22	-	29261199	29261425	29260325	29260613	29265478	29265668	52914	29,26,12	1,2,0	20,15,9	4,5,1	365	139	0.000806607	0.0281267	0.917,0.832,1.0	0.656,0.533,0.774	0.262	26.2
142879	ENSG00000171421	MRPL36	5	-	1799770	1800019	1798386	1798947	1801237	1801366	142879	30,21,14	2,2,0	48,50,55	11,18,7	388	139	0.0012019	0.037048	0.843,0.79,1.0	0.61,0.499,0.738	0.262	26.2
32806	ENSG00000155542	SETD9	5	+	56911168	56911536	56909351	56909743	56913010	56913134	32806	114154107	6,7,3	71,68,60	16,14,7	507	139	3.49599e-06	0.000474604	0.839,0.858,0.907	0.549,0.571,0.701	0.261	26.1
90083	ENSG00000165795	NDRG2	14	-	21018456	21018471	21018203	21018239	21018762	21018814	90083	10,14,7	8,2,2	7,12,16	0,0,1	154	139	6.18668e-06	0.000746197	0.53,0.863,0.76	1.0,1.0,0.935	-0.261	26.1
105757	ENSG00000165948	IFI27L1	14	+	94100742	94100771	94096855	94096965	94101813	94102059	105757	24,17,20	6,12,6	18,19,16	2,1,0	168	139	1.09277e-05	0.00116154	0.768,0.54,0.734	0.882,0.94,1.0	-0.26	26
31474	ENSG00000184381	PLA2G6	22	-	38125638	38125691	38123094	38123258	38126370	38126755	31474	44,71,41	32,40,34	5,15,15	21,31,21	192	139	4.4214e-05	0.00334011	0.499,0.562,0.466	0.147,0.259,0.341	0.26	26
47343	ENSG00000234456	MAGI2-AS3	7	+	79454885	79455007	79453959	79454244	79458846	79458999	47343	9,13,15	4,1,2	1,5,1	0,0,0	261	139	5.22081e-05	0.0037525	0.545,0.874,0.8	1.0,1.0,1.0	-0.26	26
50924	ENSG00000163374	YY1AP1	1	-	155688070	155688241	155679408	155679512	155688658	155688757	50924	10,13,11	7,0,1	9,13,15	0,0,0	310	139	0.000174785	0.00925483	0.39,1.0,0.831	1.0,1.0,1.0	-0.26	26
142761	ENSG00000095794	CREM	10	+	35179133	35179276	35127161	35127193	35188199	35188375	142761	14,14,9	0,0,0	10,9,16	3,3,0	282	139	0.000589531	0.0224013	1.0,1.0,1.0	0.622,0.597,1.0	0.26	26
141611	ENSG00000198270	TMEM116	12	-	111965594	111965759	111943264	111943369	111978735	111978787	141611	26,14,11	2,5,5	18,20,10	0,0,2	304	139	0.000171803	0.00913961	0.856,0.561,0.501	1.0,1.0,0.696	-0.259	25.9
39239	ENSG00000223891	OSER1-AS1	20	+	44214887	44215003	44210959	44211077	44224820	44226027	39239	4,2,1	2,7,4	0,0,0	4,5,6	255	139	0.000444021	0.0182809	0.522,0.135,0.12	0.0,0.0,0.0	0.259	25.9
78312	ENSG00000136161	RCBTB2	13	-	48522307	48522403	48515585	48515741	48524658	48524757	78312	22,20,11	2,0,0	3,7,6	0,2,5	235	139	0.000490133	0.0196671	0.867,1.0,1.0	1.0,0.674,0.415	0.259	25.9
143862	ENSG00000122417	ODF2L	1	-	86385457	86385590	86384675	86384801	86386914	86387079	143862	68,78,79	16,13,23	31,30,34	23,24,17	272	139	1.95254e-05	0.00179213	0.685,0.754,0.637	0.408,0.39,0.505	0.258	25.8
135643	ENSG00000132141	CCT6B	17	-	34942795	34942906	34942483	34942643	34951949	34952053	135643	36,25,24	0,0,0	11,6,21	0,3,5	250	139	2.41547e-05	0.0021087	1.0,1.0,1.0	1.0,0.527,0.7	0.258	25.8
84149	ENSG00000267254	ZNF790-AS1	19	+	36825379	36825522	36823730	36823821	36827649	36828101	84149	5,6,1	3,5,2	0,0,2	4,1,3	282	139	0.000349528	0.0154594	0.451,0.372,0.198	0.0,0.0,0.247	0.258	25.8
136930	ENSG00000105136	ZNF419	19	+	57490130	57490185	57487717	57487983	57491467	57491597	136930	4,3,3	17,8,2	0,0,2	5,6,13	194	139	0.000662873	0.0244179	0.144,0.212,0.518	0.0,0.0,0.099	0.258	25.8
87625	ENSG00000164548	TRA2A	7	-	23522131	23522432	23521706	23521840	23531788	23532041	87625	245198145	114110115	68,69,48	184183205	440	139	0	0	0.404,0.363,0.285	0.105,0.106,0.069	0.257	25.7
20835	ENSG00000137770	CTDSPL2	15	+	44484227	44484334	44459002	44459200	44486550	44486700	20835	3,1,1	1,1,0	1,1,0	2,0,6	246	139	0.000251847	0.0121957	0.629,0.361,1.0	0.22,1.0,0.0	0.257	25.7
87813	ENSG00000163354	DCST2	1	-	155031559	155031767	155026547	155026715	155032666	155032768	87813	21,26,17	0,0,1	7,11,2	4,2,0	347	139	0.000256954	0.0123245	1.0,1.0,0.872	0.412,0.688,1.0	0.257	25.7
141245	ENSG00000187608	ISG15	1	+	1002206	1002302	1001144	1001263	1008193	1008279	141245	0,6,1	3,3,2	0,0,0	1,2,1	235	139	0.00109381	0.0346876	0.0,0.542,0.228	0.0,0.0,0.0	0.257	25.7
16934	ENSG00000135541	AHI1	6	-	135290422	135290525	135283985	135285647	135300499	135300558	16934	45,30,22	7,12,6	8,8,20	1,0,0	242	139	2.3547e-06	0.000348499	0.787,0.589,0.678	0.821,1.0,1.0	-0.256	25.6
24456	ENSG00000256061	DYX1C1	15	-	55432496	55432602	55430307	55430779	55439471	55439581	24456	8,10,12	3,0,4	3,5,7	0,0,0	245	139	6.15733e-05	0.00423783	0.602,1.0,0.63	1.0,1.0,1.0	-0.256	25.6
113999	ENSG00000204054	LINC00963	9	+	129490843	129491128	129488911	129489299	129503322	129503430	113999	133,117,66	18,21,25	29,28,25	15,22,14	424	139	0.000241946	0.0118255	0.708,0.646,0.464	0.388,0.294,0.369	0.256	25.6
21466	ENSG00000153560	UBP1	3	-	33396444	33396516	33396161	33396280	33396744	33396878	21466	1,1,5	2,9,4	0,0,0	10,1,4	211	139	0.000331468	0.0148686	0.248,0.068,0.452	0.0,0.0,0.0	0.256	25.6
91656	ENSG00000089847	ANKRD24	19	+	4184643	4184727	4183353	4183477	4186389	4186461	91656	5,2,0	5,2,5	0,0,0	4,1,3	223	139	0.000408135	0.017214	0.384,0.384,0.0	0.0,0.0,0.0	0.256	25.6
22668	ENSG00000165983	PTER	10	+	16467131	16467210	16436983	16437047	16484336	16484816	22668	19,18,13	8,9,7	11,13,14	14,24,17	218	139	0.000601123	0.0227088	0.602,0.56,0.542	0.334,0.257,0.344	0.256	25.6
77644	ENSG00000205664	RP11-706O15.1	X	-	3822373	3822580	3818656	3818703	3828505	3828597	77644	15,19,13	0,2,0	9,16,17	7,3,0	346	139	0.000944255	0.0312639	1.0,0.792,1.0	0.341,0.682,1.0	0.256	25.6
88503	ENSG00000119698	PPP4R4	14	+	94227274	94227378	94208463	94208566	94230586	94230714	88503	5,2,4	3,1,10	0,1,1	1,1,7	243	139	0.00111597	0.0351372	0.488,0.534,0.186	0.0,0.364,0.076	0.256	25.6
9582	ENSG00000171428	NAT1	8	+	18217640	18217693	18216876	18216994	18219410	18219489	9582	0,0,0	14,12,13	6,6,0	7,7,4	192	139	7.25848e-07	0.000136809	0.0,0.0,0.0	0.383,0.383,0.0	-0.255	25.5
78870	ENSG00000166153	DEPDC4	12	-	100263496	100263893	100262263	100262409	100266919	100267079	78870	95,120,67	1,2,0	45,100,61	11,2,7	536	139	7.16402e-06	0.000843237	0.961,0.94,1.0	0.515,0.928,0.693	0.255	25.5
54853	ENSG00000250420	AACSP1	5	-	178768469	178768664	178767129	178767335	178772428	178772631	54853	94,97,70	10,13,8	31,28,29	8,12,14	334	139	0.000108348	0.00655107	0.796,0.756,0.785	0.617,0.493,0.463	0.255	25.5
25097	ENSG00000121957	GPSM2	1	+	108882475	108882625	108876980	108877228	108885506	108885578	25097	0,1,0	1,4,2	6,5,0	6,2,1	289	139	0.000132841	0.00760442	0.0,0.107,0.0	0.325,0.546,0.0	-0.255	25.5
100355	ENSG00000243660	ZNF487	10	+	43476106	43476202	43475720	43475847	43481428	43481678	100355	7,13,5	0,0,0	4,9,7	0,2,4	235	139	0.000401975	0.0170546	1.0,1.0,1.0	1.0,0.727,0.509	0.255	25.5
84059	ENSG00000167535	CACNB3	12	+	48816872	48816995	48815601	48815728	48823343	48823466	84059	23,32,20	17,15,6	37,28,37	43,60,43	262	139	0.000465573	0.018928	0.418,0.531,0.639	0.313,0.198,0.313	0.255	25.5
48440	ENSG00000126460	PRRG2	19	+	49583544	49583785	49583185	49583304	49583912	49583952	48440	38,37,23	1,1,0	5,27,17	2,6,0	380	139	0.000777435	0.0274748	0.933,0.931,1.0	0.478,0.622,1.0	0.255	25.5
78605	ENSG00000257337	RP11-983P16.4	12	-	53045064	53045186	53042704	53043147	53045599	53045653	78605	5,3,4	0,0,1	4,9,2	0,2,4	261	139	0.0010719	0.0342123	1.0,1.0,0.681	1.0,0.706,0.21	0.255	25.5
91671	ENSG00000204179	PTPN20	10	+	46911725	46911842	46911437	46911501	46946562	46946675	91671	2,1,4	2,2,4	0,2,0	3,6,5	256	139	0.00113858	0.0356572	0.352,0.214,0.352	0.0,0.153,0.0	0.255	25.5
45813	ENSG00000100731	PCNX	14	+	70995740	70995843	70988569	70988699	71009633	71009724	45813	17,23,9	2,10,1	16,23,15	0,0,0	242	139	1.83326e-07	4.45721e-05	0.83,0.569,0.838	1.0,1.0,1.0	-0.254	25.4
24185	ENSG00000167751	KLK2	19	+	50874720	50874880	50873457	50873519	50876471	50876758	24185	127,82,71	26,18,9	46,49,43	29,21,24	299	139	5.91182e-06	0.000725829	0.694,0.679,0.786	0.424,0.52,0.454	0.254	25.4
132358	ENSG00000139631	CSAD	12	-	53171325	53171394	53170422	53170502	53171881	53171988	132358	44,45,32	29,21,13	30,21,31	0,6,6	208	139	0.000585585	0.0223348	0.503,0.589,0.622	1.0,0.701,0.775	-0.254	25.4
88585	ENSG00000228794	LINC01128	1	+	841199	841373	829002	829104	851926	851998	88585	43,29,12	6,8,3	22,24,22	13,14,15	313	139	0.000834139	0.0288258	0.761,0.617,0.64	0.429,0.432,0.394	0.254	25.4
99528	ENSG00000132837	DMGDH	5	-	79078060	79078261	79055853	79055908	79104163	79104278	99528	8,13,3	5,1,0	8,11,3	0,0,0	340	139	0.000894236	0.0302525	0.395,0.842,1.0	1.0,1.0,1.0	-0.254	25.4
97858	ENSG00000104907	TRMT1	19	-	13112661	13112817	13110157	13110306	13112908	13113011	97858	22,16,24	0,0,0	9,8,7	1,5,0	295	139	0.000932305	0.0310517	1.0,1.0,1.0	0.809,0.43,1.0	0.254	25.4
4226	ENSG00000163864	NMNAT3	3	-	139575582	139575994	139573597	139573680	139578871	139579055	4226	11,19,17	7,15,7	4,3,0	12,10,8	551	139	1.31305e-06	0.000219353	0.284,0.242,0.38	0.078,0.07,0.0	0.253	25.3
18707	ENSG00000145088	EAF2	3	+	121854686	121854823	121844452	121844547	121857010	121857156	18707	40,49,23	3,22,8	26,34,25	1,2,1	276	139	0.000155473	0.00852232	0.87,0.529,0.591	0.929,0.895,0.926	-0.253	25.3
120189	ENSG00000233452	STXBP5-AS1	6	-	146860627	146860743	146851262	146851331	146972044	146972070	120189	5,3,0	2,2,2	0,0,2	6,6,3	255	139	0.000873689	0.0297917	0.577,0.45,0.0	0.0,0.0,0.267	0.253	25.3
62829	ENSG00000204599	TRIM39	6	+	30327651	30327696	30327341	30327455	30328888	30329041	62829	1,0,0	2,2,3	4,0,2	2,1,2	184	139	0.00110405	0.0348955	0.274,0.0,0.0	0.602,0.0,0.43	-0.253	25.3
73955	ENSG00000258984	UBE2F-SCLY	2	+	238073782	238073847	238068068	238068165	238081708	238081836	73955	4,4,1	1,5,0	4,8,3	0,1,0	204	139	0.00125854	0.0383147	0.732,0.353,1.0	1.0,0.845,1.0	-0.253	25.3
27698	ENSG00000068097	HEATR6	17	-	60073961	60074159	60073845	60073886	60076129	60076237	27698	44,36,19	27,21,22	10,3,10	28,38,21	337	139	3.9063e-08	1.2038e-05	0.402,0.414,0.263	0.128,0.032,0.164	0.252	25.2
12375	ENSG00000148842	CNNM2	10	+	102925597	102925685	102918316	102920101	102927344	102927618	12375	0,2,2	11,13,10	8,2,3	6,4,5	227	139	0.000281479	0.0131928	0.0,0.086,0.109	0.449,0.234,0.269	-0.252	25.2
89075	ENSG00000106336	FBXO24	7	+	100590173	100590315	100589976	100590075	100591666	100591902	89075	11,13,23	4,4,6	13,24,26	3,1,0	281	139	0.00144734	0.0423173	0.576,0.617,0.655	0.682,0.922,1.0	-0.252	25.2
1485	ENSG00000204576	PRR3	6	+	30561327	30561541	30557978	30558212	30561833	30562124	1485	74,72,59	1,4,3	60,65,42	14,11,9	353	139	1.81129e-06	0.000282981	0.967,0.876,0.886	0.628,0.699,0.648	0.251	25.1
123166	ENSG00000269556	TMEM185A	X	-	149603986	149604066	149600302	149600479	149608626	149608829	123166	13,25,14	0,0,0	22,19,10	2,2,6	219	139	3.7924e-06	0.000505381	1.0,1.0,1.0	0.875,0.858,0.514	0.251	25.1
140230	ENSG00000124562	SNRPC	6	+	34758029	34758189	34757405	34757551	34762594	34762703	140230	3,4,4	8,4,3	0,2,0	4,9,9	299	139	8.36966e-05	0.00536228	0.148,0.317,0.383	0.0,0.094,0.0	0.251	25.1
142253	ENSG00000160961	ZNF333	19	+	14701583	14701897	14699198	14699281	14705053	14705170	142253	11,10,10	11,3,5	2,2,1	2,5,12	453	139	0.000154639	0.00849463	0.235,0.506,0.38	0.235,0.109,0.025	0.251	25.1
89023	ENSG00000156958	GALK2	15	+	49318888	49319116	49318110	49318192	49319603	49319810	89023	9,8,7	8,2,0	3,5,4	0,1,0	367	139	0.000157028	0.00857233	0.299,0.602,1.0	1.0,0.654,1.0	-0.251	25.1
108626	ENSG00000196998	WDR45	X	-	49079855	49080095	49078040	49078112	49100204	49100554	108626	11,5,3	2,1,2	2,8,4	1,0,0	379	139	0.000944168	0.0312639	0.669,0.647,0.355	0.423,1.0,1.0	-0.251	25.1
125055	ENSG00000266338	NBPF15	1	-	144442669	144442920	144440140	144440295	144448774	144448916	125055	40,33,26	14,20,17	22,9,8	28,21,20	390	139	1.61228e-05	0.00155452	0.505,0.37,0.353	0.219,0.133,0.125	0.25	25
80167	ENSG00000065717	TLE2	19	-	3019282	3019460	3015652	3015760	3019698	3019767	80167	7,13,10	1,1,6	8,6,10	1,0,0	317	139	5.71824e-05	0.00400267	0.754,0.851,0.422	0.778,1.0,1.0	-0.25	25
38845	ENSG00000160799	CCDC12	3	-	46965983	46966129	46940997	46941065	46976352	46976483	38845	3,4,0	2,4,4	0,0,0	4,3,8	285	139	0.000455978	0.0185932	0.422,0.328,0.0	0.0,0.0,0.0	0.25	25
52129	ENSG00000049323	LTBP1	2	+	33273655	33273781	33263296	33263392	33274964	33275090	52129	23,31,13	1,0,2	6,14,28	3,4,4	265	139	0.000618226	0.0231561	0.923,1.0,0.773	0.512,0.647,0.786	0.25	25
12507	ENSG00000114062	UBE3A	15	-	25415714	25415842	25411907	25411971	25420655	25420752	12507	6,1,2	0,0,1	3,6,5	2,1,2	267	139	0.00109847	0.0347727	1.0,1.0,0.51	0.438,0.757,0.566	0.25	25
47476	ENSG00000213047	DENND1B	1	-	197658299	197658319	197652234	197652315	197672036	197672156	47476	5,3,3	5,8,2	1,1,0	3,2,2	159	139	0.00143362	0.0420756	0.466,0.247,0.567	0.226,0.304,0.0	0.25	25
57918	ENSG00000152795	HNRNPDL	4	-	82425562	82425650	82424628	82424883	82426036	82426121	57918	147134102	108,143,90	65,74,54	224207186	227	139	0	0	0.455,0.365,0.41	0.151,0.18,0.151	0.249	24.9
30443	ENSG00000143416	SELENBP1	1	-	151369110	151369189	151368198	151368319	151369712	151369794	30443	39,43,28	52,87,20	12,5,6	37,55,57	218	139	1.52337e-07	3.86381e-05	0.324,0.24,0.472	0.171,0.055,0.063	0.249	24.9
137833	ENSG00000282826	FRG1CP	20	-	28601656	28601756	28600391	28600461	28602608	28602664	137833	133,169,90	67,69,22	90,71,67	77,80,77	239	139	3.69471e-07	7.85617e-05	0.536,0.588,0.704	0.405,0.34,0.336	0.249	24.9
102847	ENSG00000119946	CNNM1	10	+	99388155	99388301	99387819	99388003	99390305	99390407	102847	32,35,43	1,1,1	17,33,46	7,8,3	285	139	3.67189e-05	0.00290266	0.94,0.945,0.954	0.542,0.668,0.882	0.249	24.9
60591	ENSG00000111596	CNOT2	12	+	70294810	70294883	70294236	70294294	70297758	70297879	60591	3,1,3	4,7,4	0,0,0	2,1,6	212	139	0.000182277	0.0095734	0.33,0.086,0.33	0.0,0.0,0.0	0.249	24.9
145182	ENSG00000173926	2003-03-01	5	-	126912096	126912191	126898872	126899266	126914929	126914990	145182	1,2,1	1,0,1	0,1,0	2,0,2	234	139	0.000789346	0.0277842	0.373,1.0,0.373	0.0,1.0,0.0	0.249	24.9
35565	ENSG00000007392	LUC7L	16	-	228332	228402	227241	227336	229278	229450	35565	92,86,77	38,29,38	34,35,34	32,46,40	209	139	1.59548e-07	3.97313e-05	0.617,0.664,0.574	0.414,0.336,0.361	0.248	24.8
8873	ENSG00000010361	FUZ	19	-	49812446	49812736	49812250	49812335	49812995	49813299	8873	23,21,14	1,2,3	2,8,6	0,0,0	429	139	0.000505468	0.0201108	0.882,0.773,0.602	1.0,1.0,1.0	-0.248	24.8
92978	ENSG00000185043	CIB1	15	-	90232216	90232427	90231356	90231507	90233668	90233703	92978	65,61,30	12,6,10	33,26,27	17,17,12	350	139	0.00115741	0.0360826	0.683,0.801,0.544	0.435,0.378,0.472	0.248	24.8
71121	ENSG00000125826	RBCK1	20	+	420906	421153	419557	419731	422126	422238	71121	75,94,57	8,18,20	22,43,28	14,21,15	386	139	0.00133925	0.0401471	0.771,0.653,0.506	0.361,0.424,0.402	0.248	24.8
38112	ENSG00000073921	PICALM	11	-	85990249	85990378	85983865	85983973	85996825	85996929	38112	220235170	124127108	196214252	31,65,41	268	139	8.90236e-10	4.70973e-07	0.479,0.49,0.449	0.766,0.631,0.761	-0.247	24.7
1488	ENSG00000204576	PRR3	6	+	30561327	30561508	30557978	30558212	30561833	30562124	1488	126,96,86	1,4,3	54,70,53	14,11,9	320	139	9.6677e-09	3.61124e-06	0.982,0.912,0.926	0.626,0.734,0.719	0.247	24.7
109407	ENSG00000120725	SIL1	5	-	139187910	139188057	139127738	139127853	139196440	139196528	109407	2,7,14	14,8,8	0,0,2	24,6,11	286	139	1.03214e-06	0.00018089	0.065,0.298,0.46	0.0,0.0,0.081	0.247	24.7
78686	ENSG00000176261	ZBTB8OS	1	-	32633950	32634110	32621857	32621948	32650428	32650550	78686	24,17,19	2,4,3	24,10,25	0,0,0	299	139	2.41496e-06	0.000354809	0.848,0.664,0.746	1.0,1.0,1.0	-0.247	24.7
130913	ENSG00000140543	DET1	15	-	88536311	88536381	88530622	88531715	88546241	88546337	130913	9,11,10	0,1,0	3,6,8	0,4,3	209	139	0.000113909	0.00679304	1.0,0.88,1.0	1.0,0.499,0.639	0.247	24.7
15225	ENSG00000214176	PLEKHM1P	17	-	64824825	64824872	64822253	64822393	64829160	64829208	15225	16,15,4	1,4,2	6,9,2	0,0,0	186	139	0.000216031	0.010867	0.923,0.737,0.599	1.0,1.0,1.0	-0.247	24.7
98592	ENSG00000101104	PABPC1L	20	+	44952642	44952704	44938060	44938191	44958336	44959035	98592	13,5,8	13,11,3	1,0,1	4,2,1	201	139	0.000540815	0.0210897	0.409,0.239,0.648	0.147,0.0,0.409	0.247	24.7
28411	ENSG00000110274	CEP164	11	+	117382795	117382942	117381700	117381868	117387202	117387412	28411	79,91,80	26,30,12	27,26,28	28,22,12	286	139	0.000654128	0.0241787	0.596,0.596,0.764	0.319,0.365,0.531	0.247	24.7
27630	ENSG00000196155	PLEKHG4	16	+	67280710	67280806	67279875	67280543	67281090	67281184	27630	9,4,4	8,2,1	5,3,4	1,1,0	235	139	0.000691851	0.0252464	0.4,0.542,0.703	0.747,0.64,1.0	-0.247	24.7
81165	ENSG00000228409	CCT6P1	7	+	65752163	65752310	65751143	65751278	65755779	65755952	81165	3,10,6	31,22,41	5,4,15	10,6,5	286	139	0.00170102	0.0472216	0.045,0.181,0.066	0.195,0.245,0.593	-0.247	24.7
94307	ENSG00000160993	ALKBH4	7	-	102459607	102459710	102456833	102457981	102464713	102464863	94307	22,18,7	0,0,0	24,12,27	1,6,4	242	139	2.95921e-06	0.000412659	1.0,1.0,1.0	0.932,0.535,0.795	0.246	24.6
890	ENSG00000197958	RPL12	9	-	127449474	127449708	127449280	127449362	127451280	127451405	890	23,22,31	0,1,0	27,21,15	0,11,2	373	139	5.95654e-05	0.00413193	1.0,0.891,1.0	1.0,0.416,0.736	0.246	24.6
34650	ENSG00000197275	RAD54B	8	-	94418655	94418783	94411120	94411315	94432610	94432656	34650	9,9,7	7,1,6	1,5,8	1,0,0	267	139	8.99397e-05	0.0056767	0.401,0.824,0.378	0.342,1.0,1.0	-0.246	24.6
7180	ENSG00000259768	RP5-991G20.1	16	+	72777566	72777720	72747120	72747182	72781727	72781819	7180	4,0,3	4,2,2	0,0,0	1,1,1	293	139	0.000325971	0.0146755	0.322,0.0,0.416	0.0,0.0,0.0	0.246	24.6
104633	ENSG00000204580	DDR1	6	+	30883080	30883326	30882954	30882983	30884537	30884710	104633	24,32,20	27,16,6	15,9,15	25,27,24	385	139	0.000669757	0.0246151	0.243,0.419,0.546	0.178,0.107,0.184	0.246	24.6
137823	ENSG00000282826	FRG1CP	20	-	28601660	28601756	28600391	28600461	28602608	28602664	137823	72,93,48	67,69,22	45,31,36	77,80,77	235	139	3.32564e-07	7.19196e-05	0.389,0.444,0.563	0.257,0.186,0.217	0.245	24.5
133947	ENSG00000215252	GOLGA8B	15	-	34552894	34553045	34551190	34551276	34553744	34553956	133947	117,115,98	9,5,12	30,27,32	7,10,10	290	139	3.85089e-05	0.00300435	0.862,0.917,0.797	0.673,0.564,0.605	0.245	24.5
41719	ENSG00000164081	TEX264	3	+	51672209	51672301	51671626	51671672	51674270	51674562	41719	17,15,8	0,2,6	10,23,7	0,0,0	231	139	9.42193e-05	0.00586572	1.0,0.819,0.445	1.0,1.0,1.0	-0.245	24.5
26479	ENSG00000169992	NLGN2	17	+	7408579	7408712	7404873	7405610	7412156	7412207	26479	15,25,18	8,2,5	28,16,34	1,2,0	272	139	0.000108143	0.0065474	0.489,0.865,0.648	0.935,0.803,1.0	-0.245	24.5
129156	ENSG00000233184	RP11-421L21.3	1	+	101077362	101077508	101025877	101026061	101083460	101083574	129156	23,37,27	3,15,4	9,42,28	0,4,0	285	139	0.000433106	0.0179938	0.789,0.546,0.767	1.0,0.837,1.0	-0.245	24.5
54174	ENSG00000148057	IDNK	9	+	83628180	83628211	83623167	83623221	83641547	83641591	54174	0,2,4	2,6,3	0,0,0	1,5,3	170	139	0.00131269	0.0395821	0.0,0.214,0.522	0.0,0.0,0.0	0.245	24.5
28468	ENSG00000023697	DERA	12	+	15958187	15958239	15956935	15957033	15959828	15959924	28468	72,96,58	16,7,1	47,61,51	18,23,24	191	139	1.86842e-06	0.000290434	0.766,0.909,0.977	0.655,0.659,0.607	0.244	24.4
113715	ENSG00000106070	GRB10	7	-	50780626	50780736	50755886	50756056	50792460	50792537	113715	36,31,30	15,19,14	48,53,57	7,7,12	249	139	7.35096e-05	0.00487167	0.573,0.477,0.545	0.793,0.809,0.726	-0.244	24.4
8355	ENSG00000130779	CLIP1	12	-	122417345	122417457	122400131	122400243	122422520	122422612	8355	1,5,1	1,6,2	1,0,0	3,4,1	251	139	0.000403646	0.0170951	0.356,0.316,0.217	0.156,0.0,0.0	0.244	24.4
98562	ENSG00000101104	PABPC1L	20	+	44933056	44933189	44930520	44930726	44935390	44935497	98562	30,25,10	7,5,3	9,6,13	0,0,2	272	139	0.000431205	0.017933	0.687,0.719,0.63	1.0,1.0,0.769	-0.244	24.4
125443	ENSG00000153774	CFDP1	16	-	75394859	75395010	75391397	75391508	75395089	75395209	125443	0,2,0	13,11,16	1,8,0	1,4,4	290	139	0.000715896	0.0258787	0.0,0.08,0.0	0.324,0.489,0.0	-0.244	24.4
122765	ENSG00000149182	ARFGAP2	11	-	47173758	47173915	47172281	47172333	47175014	47175098	122765	3,4,6	0,3,2	6,4,5	0,0,1	296	139	0.00150612	0.0434383	1.0,0.385,0.585	1.0,1.0,0.701	-0.244	24.4
90640	ENSG00000198625	MDM4	1	+	204537458	204537497	204532190	204532246	204538208	204538308	90640	16,14,8	6,4,1	6,14,6	0,0,0	178	139	8.14782e-07	0.000150212	0.676,0.732,0.862	1.0,1.0,1.0	-0.243	24.3
3886	ENSG00000143669	LYST	1	-	235747169	235747331	235746467	235746527	235751209	235751378	3886	6,1,4	5,8,4	0,0,0	5,2,6	301	139	7.5863e-06	0.000882208	0.357,0.055,0.316	0.0,0.0,0.0	0.243	24.3
73685	ENSG00000183077	AFMID	17	+	78197134	78197363	78190969	78191060	78206910	78207187	73685	27,40,38	38,31,13	16,29,19	54,64,73	368	139	1.00485e-05	0.00108696	0.212,0.328,0.525	0.101,0.146,0.09	0.243	24.3
80903	ENSG00000121766	ZCCHC17	1	+	31363847	31363940	31338926	31339048	31364031	31364953	80903	0,5,5	6,7,4	0,0,0	8,2,5	232	139	1.57768e-05	0.00152555	0.0,0.3,0.428	0.0,0.0,0.0	0.243	24.3
94921	ENSG00000225733	FGD5-AS1	3	-	14947109	14947209	14945023	14946154	14947738	14947893	94921	21,9,5	3,2,1	10,12,18	0,0,0	239	139	0.00031962	0.0144688	0.803,0.724,0.744	1.0,1.0,1.0	-0.243	24.3
84193	ENSG00000089053	ANAPC5	12	-	121331226	121331439	121330582	121330672	121335532	121335723	84193	14,16,16	3,2,1	2,10,2	0,0,0	352	139	0.00044537	0.0182881	0.648,0.76,0.863	1.0,1.0,1.0	-0.243	24.3
92177	ENSG00000214022	REPIN1	7	+	150370759	150370884	150369670	150369697	150371230	150371632	92177	9,14,11	3,0,3	10,10,9	0,0,0	264	139	0.000731318	0.0262241	0.612,1.0,0.659	1.0,1.0,1.0	-0.243	24.3
118087	ENSG00000125458	NT5C	17	-	75130964	75131081	75130752	75130867	75131180	75131281	118087	28,41,16	14,1,5	19,23,16	2,0,0	256	139	8.20719e-05	0.00529396	0.521,0.957,0.635	0.838,1.0,1.0	-0.242	24.2
119159	ENSG00000109180	OCIAD1	4	+	48831226	48831433	48831062	48831141	48832619	48832679	119159	65,41,41	2,1,3	33,17,21	3,4,7	346	139	0.000969474	0.0317999	0.929,0.943,0.846	0.815,0.631,0.547	0.242	24.2
16024	ENSG00000106080	FKBP14	7	-	30020212	30020296	30018995	30019123	30022664	30022816	16024	17,22,12	16,23,26	4,3,9	29,27,38	223	139	3.57091e-06	0.000483343	0.398,0.374,0.223	0.079,0.065,0.129	0.241	24.1
16310	ENSG00000134815	DHX34	19	+	47376972	47376989	47376442	47376560	47377099	47377206	16310	9,5,0	7,19,18	0,0,0	3,5,9	156	139	2.4747e-05	0.00215582	0.534,0.19,0.0	0.0,0.0,0.0	0.241	24.1
45824	ENSG00000100731	PCNX	14	+	71009633	71009724	70995740	70995925	71012999	71013202	45824	13,11,12	3,2,2	10,6,11	0,0,0	230	139	8.25595e-05	0.00531152	0.724,0.769,0.784	1.0,1.0,1.0	-0.241	24.1
114505	ENSG00000141447	OSBPL1A	18	-	24287647	24287764	24280841	24280948	24303636	24303718	114505	0,0,0	16,19,10	4,4,0	5,3,13	256	139	0.000201909	0.010353	0.0,0.0,0.0	0.303,0.42,0.0	-0.241	24.1
92020	ENSG00000126456	IRF3	19	-	49664442	49664673	49663187	49663258	49665630	49665705	92020	33,43,21	2,4,3	25,34,34	8,9,11	370	139	0.00132903	0.0399381	0.861,0.802,0.724	0.54,0.587,0.537	0.241	24.1
38093	ENSG00000073921	PICALM	11	-	85990249	85990408	85983865	85983973	85996825	85996929	38093	247252185	124127108	209233254	31,65,41	298	139	1.28346e-09	6.45746e-07	0.482,0.481,0.444	0.759,0.626,0.743	-0.24	24
110535	ENSG00000137073	UBAP2	9	-	33960825	33960878	33953284	33953474	33971650	33971754	110535	7,16,10	1,2,5	7,8,2	0,0,0	192	139	1.08091e-05	0.0011546	0.835,0.853,0.591	1.0,1.0,1.0	-0.24	24
125066	ENSG00000266338	NBPF15	1	-	144442669	144442917	144440140	144440295	144448774	144448916	125066	38,34,23	14,20,17	22,8,9	28,21,20	387	139	3.69673e-05	0.00291545	0.494,0.379,0.327	0.22,0.12,0.139	0.24	24
944	ENSG00000213185	FAM24B	10	-	122850423	122850550	122849077	122849439	122855644	122855786	944	84,100,60	5,11,8	29,39,40	17,9,12	266	139	0.000113146	0.0067638	0.898,0.826,0.797	0.471,0.694,0.635	0.24	24
60077	ENSG00000186472	PCLO	7	-	82840604	82840755	82838217	82838342	82841458	82841509	60077	8,5,6	9,9,4	0,2,1	3,13,3	290	139	0.00015206	0.00842048	0.299,0.21,0.418	0.0,0.069,0.138	0.24	24
59627	ENSG00000135315	CEP162	6	-	84226336	84226452	84221056	84221171	84227579	84227617	59627	10,20,13	3,1,5	24,4,25	2,0,0	255	139	0.000305961	0.0140165	0.645,0.916,0.586	0.867,1.0,1.0	-0.24	24
140523	ENSG00000150776	C11orf57	11	+	112074808	112074916	112074315	112074358	112075566	112075684	140523	67,79,68	23,29,9	40,62,58	41,36,37	247	139	0.000377553	0.016261	0.621,0.605,0.81	0.354,0.492,0.469	0.24	24
104724	ENSG00000123268	ATF1	12	+	50767076	50767153	50764291	50764404	50780139	50780238	104724	0,1,0	15,6,2	5,0,2	3,3,3	216	139	0.000585907	0.0223351	0.0,0.097,0.0	0.517,0.0,0.3	-0.24	24
123602	ENSG00000229267	AC072062.1	2	+	214960392	214960590	214833988	214834105	214961809	214962062	123602	4,14,3	5,9,2	4,4,1	9,14,10	337	139	0.000974843	0.0318997	0.248,0.391,0.382	0.155,0.105,0.04	0.24	24
72996	ENSG00000229043	AC091729.9	7	+	1163451	1163495	1160373	1160623	1164160	1165267	72996	21,39,16	0,0,2	8,20,10	4,2,4	183	139	2.97116e-05	0.00248808	1.0,1.0,0.859	0.603,0.884,0.655	0.239	23.9
50126	ENSG00000096063	SRPK1	6	-	35902071	35902228	35890894	35891013	35904878	35904974	50126	2,2,3	3,5,3	0,0,0	9,1,4	296	139	0.000252718	0.0122164	0.238,0.158,0.32	0.0,0.0,0.0	0.239	23.9
133377	ENSG00000088448	ANKRD10	13	-	110900529	110900661	110892956	110893263	110906032	110906124	133377	17,27,22	8,30,21	8,11,7	23,22,27	271	139	0.000261559	0.0124792	0.522,0.316,0.35	0.151,0.204,0.117	0.239	23.9
87822	ENSG00000163354	DCST2	1	-	155031559	155031781	155026547	155026715	155032666	155032768	87822	24,26,16	0,0,1	9,11,4	4,2,0	361	139	0.00030946	0.0141385	1.0,1.0,0.86	0.464,0.679,1.0	0.239	23.9
81434	ENSG00000196873	CBWD3	9	+	68269599	68269722	68268933	68268978	68270301	68270385	81434	12,13,11	0,9,4	11,15,12	2,0,0	262	139	0.000462484	0.0188211	1.0,0.434,0.593	0.745,1.0,1.0	-0.239	23.9
123673	ENSG00000130489	SCO2	22	-	50525747	50525918	50523567	50524424	50526245	50526439	123673	93,88,39	23,22,8	62,23,25	24,30,13	310	139	0.00155315	0.0443588	0.645,0.642,0.686	0.537,0.256,0.463	0.239	23.9
29594	ENSG00000119929	CUTC	10	+	99750368	99750396	99747256	99747390	99754528	99754550	29594	14,15,9	30,28,27	18,23,30	16,16,26	167	139	0.000152611	0.00843204	0.28,0.308,0.217	0.484,0.545,0.49	-0.238	23.8
108528	ENSG00000188917	TRMT2B	X	-	101051250	101051366	101035612	101035683	101051816	101052054	108528	3,7,2	1,0,0	7,4,5	4,1,1	255	139	0.000274066	0.0129339	0.621,1.0,1.0	0.488,0.686,0.732	0.238	23.8
63884	ENSG00000147202	DIAPH2	X	+	97469693	97469780	97429649	97429745	97599252	97600598	63884	14,17,10	33,40,23	13,11,17	9,11,11	226	139	0.000342052	0.0152161	0.207,0.207,0.211	0.47,0.381,0.487	-0.238	23.8
66194	ENSG00000258830	RP11-123K3.4	12	-	57289008	57289040	57283823	57284056	57295398	57295507	66194	37,43,53	41,28,17	27,49,41	6,10,7	171	139	0.000388519	0.0166175	0.423,0.555,0.717	0.785,0.799,0.826	-0.238	23.8
88392	ENSG00000214725	CDIPT-AS1	16	+	29865355	29865442	29865159	29865193	29867863	29868047	88392	20,17,6	2,0,5	14,4,2	0,0,0	226	139	0.00059792	0.0226224	0.86,1.0,0.425	1.0,1.0,1.0	-0.238	23.8
12162	ENSG00000187239	FNBP1	9	-	129923843	129923996	129908889	129908999	129924959	129925157	12162	66,72,40	19,17,9	20,51,32	28,23,16	292	139	0.00153782	0.0440844	0.623,0.668,0.679	0.254,0.514,0.488	0.238	23.8
137820	ENSG00000282826	FRG1CP	20	-	28601602	28601756	28600391	28600461	28602608	28602664	137820	95,118,64	67,69,22	60,49,47	77,80,77	293	139	8.68963e-07	0.000157059	0.402,0.448,0.58	0.27,0.225,0.225	0.237	23.7
90974	ENSG00000179454	KLHL28	14	-	44960886	44961087	44934114	44934558	44961845	44961965	90974	0,1,1	2,1,0	2,0,1	0,1,0	340	139	1.44102e-05	0.00142486	0.0,0.29,1.0	1.0,0.0,1.0	-0.237	23.7
34649	ENSG00000197275	RAD54B	8	-	94418655	94418783	94411120	94411315	94458267	94458436	34649	13,15,13	27,8,14	7,9,6	42,36,24	267	139	0.000154086	0.00847936	0.2,0.494,0.326	0.08,0.115,0.115	0.237	23.7
13954	ENSG00000224078	SNHG14	15	+	25087466	25087599	25083395	25083527	25091589	25091719	13954	7,4,6	0,1,0	14,6,8	1,3,3	272	139	0.00029333	0.013583	1.0,0.671,1.0	0.877,0.505,0.577	0.237	23.7
102093	ENSG00000204231	RXRB	6	-	33195569	33195810	33194944	33195050	33195906	33196036	102093	37,18,34	0,0,1	18,8,12	4,2,0	380	139	0.000628797	0.0234665	1.0,1.0,0.926	0.622,0.594,1.0	0.237	23.7
88522	ENSG00000175309	PHYKPL	5	-	178224654	178224729	178224447	178224564	178229939	178230073	88522	1,11,1	1,3,3	0,2,0	3,1,5	214	139	0.00117153	0.0363939	0.394,0.704,0.178	0.0,0.565,0.0	0.237	23.7
45040	ENSG00000213930	GALT	9	+	34647656	34647705	34646667	34647258	34647831	34647961	45040	22,24,14	29,18,15	38,31,27	10,19,9	188	139	0.00168582	0.0469709	0.359,0.496,0.408	0.738,0.547,0.689	-0.237	23.7
5576	ENSG00000124635	HIST1H2BJ	6	-	27127263	27127401	27125896	27126462	27132524	27132548	5576	101,87,85	52,42,45	31,57,38	49,62,65	277	139	1.12556e-08	4.10487e-06	0.494,0.51,0.487	0.241,0.316,0.227	0.236	23.6
121395	ENSG00000145730	PAM	5	+	102974115	102974436	102961157	102961229	102990271	102990401	121395	83,108,75	23,40,34	90,91,87	13,13,10	460	139	1.20346e-05	0.00123675	0.522,0.449,0.4	0.677,0.679,0.724	-0.236	23.6
9186	ENSG00000198945	L3MBTL3	6	+	130049650	130049830	130049281	130049393	130051248	130051343	9186	8,8,4	7,9,6	0,0,1	1,2,3	319	139	3.31226e-05	0.00268901	0.332,0.279,0.225	0.0,0.0,0.127	0.236	23.6
56917	ENSG00000183647	ZNF530	19	+	57605685	57607827	57599884	57600134	57612502	57612722	56917	228207157	0,2,1	176213164	6,7,3	2281	139	4.4669e-05	0.00336154	1.0,0.863,0.905	0.641,0.65,0.769	0.236	23.6
1247	ENSG00000163660	CCNL1	3	-	157151761	157151930	157150281	157150381	157152176	157152241	1247	102,86,84	49,71,28	16,25,16	23,33,27	308	139	6.39989e-05	0.00436819	0.484,0.353,0.575	0.239,0.255,0.211	0.236	23.6
1486	ENSG00000204576	PRR3	6	+	30561327	30561541	30557313	30557450	30561833	30562124	1486	43,44,36	8,17,17	45,50,39	34,28,72	353	139	0.001618	0.0456922	0.679,0.505,0.455	0.343,0.413,0.176	0.236	23.6
4748	ENSG00000065526	SPEN	1	+	15938825	15938876	15937811	15938006	15939295	15940460	4748	10,13,11	5,6,0	14,17,8	1,0,0	190	139	2.72886e-05	0.00233272	0.594,0.613,1.0	0.911,1.0,1.0	-0.235	23.5
116628	ENSG00000172869	DMXL1	5	+	119238856	119239080	119237321	119237414	119240418	119240471	116628	52,49,45	1,2,1	26,28,17	6,7,1	363	139	0.000117124	0.00693778	0.952,0.904,0.945	0.624,0.605,0.867	0.235	23.5
[truncated: 5,457 more rows]
