# Supplementary material for: Clinical and molecular significance of the RNA m6A methyltransferase complex in prostate cancer
Source: Frontiers journal article supplement (doi:10.3389/fgene.2022.1096071), 2023-01-12
Supplement: Data_Sheet_2.zip [file Supplementary_table_6.xlsx]

## Sheet: Sheet1
Supplementary Table 6. Significantly (fold change ±1.5 and FDR-corrected p-value <0.05) differentially expressed AR-regulated genes in shSCR vs shMETTL3 in LNCaP:C4-2 cells.
A) Genes significantly upregulated with shMETTL3
Ensembl ID	log2FoldChange	pvalue	Gene Symbol
ENSG00000121858	-3.73285	0.00866685	TNFSF10
ENSG00000148735	-3.18177	9.17e-12	PLEKHS1
ENSG00000164379	-2.92823	1.3e-20	FOXQ1
ENSG00000136999	-2.65376	0.118942	CCN3
ENSG00000196196	-2.60462	0.183336	HRCT1
ENSG00000169908	-2.59194	1.63e-21	TM4SF1
ENSG00000174469	-2.50162	7.68e-62	CNTNAP2
ENSG00000124126	-2.36027	1.57e-172	PREX1
ENSG00000115590	-2.27238	0.000394019	IL1R2
ENSG00000188037	-2.04552	0.0123615	CLCN1
ENSG00000143502	-2.00765	2.73e-10	SUSD4
ENSG00000080493	-1.98591	2.75e-49	SLC4A4
ENSG00000197635	-1.86128	1.81e-81	DPP4
ENSG00000164362	-1.82586	7.21e-13	TERT
ENSG00000184408	-1.73214	0.250834	KCND2
ENSG00000183780	-1.71451	0.020711	SLC35F3
ENSG00000124935	-1.71209	0.0964268	SCGB1D2
ENSG00000240184	-1.70108	1.24e-13	PCDHGC3
ENSG00000185942	-1.64001	5.17e-06	NKAIN3
ENSG00000198947	-1.55241	5.4e-26	DMD
ENSG00000175832	-1.50184	0.00376713	ETV4
ENSG00000111846	-1.48284	6.53e-17	GCNT2
ENSG00000186480	-1.4641	3.28e-46	INSIG1
ENSG00000169252	-1.44014	7.31e-09	ADRB2
ENSG00000075223	-1.42438	1.39e-75	SEMA3C
ENSG00000114790	-1.37358	2.96e-97	ARHGEF26
ENSG00000114805	-1.36169	1.08e-41	PLCH1
ENSG00000134240	-1.28877	4.14e-54	HMGCS2
ENSG00000158125	-1.2881	0.146515	XDH
ENSG00000169860	-1.27997	8.9e-18	P2RY1
ENSG00000148700	-1.27507	1.52e-170	ADD3
ENSG00000189221	-1.26992	2.55e-181	MAOA
ENSG00000075651	-1.26409	1.48e-08	PLD1
ENSG00000010270	-1.26404	2.5e-60	STARD3NL
ENSG00000041515	-1.25629	0.142527	MYO16
ENSG00000134215	-1.23603	1.33e-08	VAV3
ENSG00000164326	-1.23456	0.604723	CARTPT
ENSG00000081277	-1.23456	0.646348	PKP1
ENSG00000156218	-1.20646	7.71e-11	ADAMTSL3
ENSG00000071575	-1.20147	3.06e-07	TRIB2
ENSG00000164742	-1.19818	3.48e-39	ADCY1
ENSG00000139988	-1.19263	0.00493972	RDH12
ENSG00000198033	-1.19119	0.211529	TUBA3C
ENSG00000185274	-1.17718	0.015268	GALNT17
ENSG00000153162	-1.17158	2.3e-05	BMP6
ENSG00000124939	-1.17077	0.176157	SCGB2A1
ENSG00000106128	-1.15668	0.60425	GHRHR
ENSG00000131389	-1.15321	6.35e-11	SLC6A6
ENSG00000169710	-1.10463	3.27e-16	FASN
ENSG00000170312	-1.09409	8.86e-62	CDK1
ENSG00000160753	-1.08786	3.34e-52	RUSC1
ENSG00000155368	-1.08766	9.98e-74	DBI
ENSG00000090530	-1.08734	0.00718585	P3H2
ENSG00000164442	-1.08595	1.8e-39	CITED2
ENSG00000073111	-1.06473	2.91e-77	MCM2
ENSG00000049541	-1.05018	2.8e-72	RFC2
ENSG00000166902	-1.0434	2.64e-90	MRPL16
ENSG00000106785	-1.03074	5.61e-59	TRIM14
ENSG00000127954	-1.02075	0.465376	STEAP4
ENSG00000154328	-1.00644	1.63e-60	NEIL2
ENSG00000197142	-1.00589	0.0120801	ACSL5
ENSG00000073536	-1.00168	1.07e-37	NLE1
ENSG00000143603	-0.992781	0.100721	KCNN3
ENSG00000173212	-0.990662	0.112808	MAB21L3
ENSG00000102547	-0.953699	6.03e-39	CAB39L
ENSG00000116133	-0.937535	3.76e-63	DHCR24
ENSG00000144331	-0.934509	9.74e-19	ZNF385B
ENSG00000167191	-0.930649	6.29e-13	GPRC5B
ENSG00000034152	-0.927871	6.77e-45	MAP2K3
ENSG00000183048	-0.925058	1.19e-25	SLC25A10
ENSG00000106852	-0.909206	2.49e-15	LHX6
ENSG00000134369	-0.909012	8.63e-22	NAV1
ENSG00000207181	-0.896258	0.224529	SNORA14B
ENSG00000050344	-0.889085	2.79e-21	NFE2L3
ENSG00000114631	-0.889076	2.85e-77	PODXL2
ENSG00000072422	-0.885726	1.18e-07	RHOBTB1
ENSG00000078124	-0.884801	7.11e-48	ACER3
ENSG00000113048	-0.881721	3.5e-62	MRPS27
ENSG00000130768	-0.881309	4.48e-19	SMPDL3B
ENSG00000156113	-0.879331	5.63e-66	KCNMA1
ENSG00000196335	-0.872723	0.641398	STK31
ENSG00000154447	-0.861879	1.91e-50	SH3RF1
ENSG00000010278	-0.845059	3.49e-74	CD9
ENSG00000172159	-0.840589	0.000170015	FRMD3
ENSG00000131473	-0.834816	3.04e-49	ACLY
ENSG00000160767	-0.817641	6.93e-27	FAM189B
ENSG00000100558	-0.795403	6.62e-06	PLEK2
ENSG00000189319	-0.777495	1.44e-19	FAM53B
ENSG00000156802	-0.770419	1.91e-42	ATAD2
ENSG00000144736	-0.765041	5.58e-15	SHQ1
ENSG00000116237	-0.759727	2.14e-61	ICMT
ENSG00000167183	-0.735659	3.37e-32	PRR15L
ENSG00000066032	-0.730742	0.57156	CTNNA2
ENSG00000146918	-0.726163	2.57e-39	NCAPG2
ENSG00000163545	-0.722893	2.89e-10	NUAK2
ENSG00000121440	-0.722306	5.63e-05	PDZRN3
ENSG00000129422	-0.721327	1.02e-28	MTUS1
ENSG00000111684	-0.719696	3.91e-21	LPCAT3
ENSG00000100228	-0.71745	1.53e-06	RAB36
ENSG00000116833	-0.717385	0.417716	NR5A2
ENSG00000266094	-0.716219	6.89e-12	RASSF5
ENSG00000145945	-0.715713	2.15e-13	FAM50B
ENSG00000119471	-0.705893	1.87e-44	HSDL2
ENSG00000141905	-0.704017	3.91e-21	NFIC
ENSG00000175471	-0.698431	0.000441219	MCTP1
ENSG00000169756	-0.694794	1.3e-33	LIMS1
ENSG00000079459	-0.691794	1.35e-42	FDFT1
ENSG00000122565	-0.690769	2.94e-25	CBX3
ENSG00000167034	-0.683202	4.4e-19	NKX3-1
ENSG00000103811	-0.679135	4.11e-40	CTSH
ENSG00000137876	-0.677729	5.98e-25	RSL24D1
ENSG00000145982	-0.676077	1.63e-15	FARS2
ENSG00000108439	-0.67573	8.24e-37	PNPO
ENSG00000125505	-0.671589	2.81e-23	MBOAT7
ENSG00000072042	-0.670507	6.18e-45	RDH11
ENSG00000130669	-0.669456	6.51e-24	PAK4
ENSG00000087299	-0.663246	7.26e-34	L2HGDH
ENSG00000184185	-0.660236	0.0035204	KCNJ12
ENSG00000172164	-0.653579	0.00209685	SNTB1
ENSG00000166743	-0.642242	0.560967	ACSM1
ENSG00000175792	-0.641004	2.44e-55	RUVBL1
ENSG00000174705	-0.638723	4.11e-14	SH3PXD2B
ENSG00000176087	-0.637549	1.3e-20	SLC35A4
ENSG00000136267	-0.626496	4.28e-08	DGKB
ENSG00000165271	-0.626417	2.32e-32	NOL6
ENSG00000196950	-0.61889	7.4e-19	SLC39A10
ENSG00000006468	-0.61389	0.699787	ETV1
ENSG00000109654	-0.611336	2.07e-24	TRIM2
ENSG00000240891	-0.609577	0.0254823	PLCXD2
ENSG00000196167	-0.609492	5.2e-11	COLCA1
ENSG00000108423	-0.598204	1.5e-09	TUBD1
ENSG00000164494	-0.595231	3.25e-26	PDSS2
ENSG00000065485	-0.591727	1.96e-30	PDIA5
ENSG00000123643	-0.588796	6.67e-14	SLC36A1
