# Supplementary material for: Clinical and molecular significance of the RNA m6A methyltransferase complex in prostate cancer
Source: Frontiers journal article supplement (doi:10.3389/fgene.2022.1096071), 2023-01-12
Supplement: Data_Sheet_2.zip [file Supplementary_table_7.xlsx]

## Sheet: Sheet1
Supplementary Table 7. Significantly (fold change ±1.5 and FDR-corrected p-value <0.05) differentially expressed genes in shSCR vs shMETTL3 (shMETTL3 guide 1 DEGs not reported in manuscript) in LNCaP:C4-2 prostate cancer cells.
A) Genes significantly upregulated with shMETTL3									B) Genes significantly downregulated with shMETTL3
Ensembl ID	baseMean	log2FoldChange	lfcSE	stat	pvalue	padj	Gene Symbol		Ensembl ID	baseMean	log2FoldChange	lfcSE	stat	pvalue	padj	Gene Symbol
ENSG00000163421	11.0641	-7.76069	1.24767	-6.22015	4.97e-10	2.42e-09	PROK2		ENSG00000085719	5188.37	0.585108	0.039063	14.9785	1.01e-50	2.48e-49	CPNE3
ENSG00000256802	8.73693	-7.12705	1.2882	-5.53258	3.16e-08	1.35e-07	AC022613.1		ENSG00000276248	43.532	0.585169	0.23499	2.49018	0.0127677	0.029044	AL442125.1
ENSG00000198846	15.2608	-7.07136	1.23004	-5.7489	8.98e-09	3.99e-08	TOX		ENSG00000176340	3947.05	0.585181	0.0880339	6.64722	2.99e-11	1.59e-10	COX8A
ENSG00000196335	20.9387	-6.72756	1.06816	-6.29826	3.01e-10	1.49e-09	STK31		ENSG00000204792	253.001	0.585248	0.119739	4.8877	1.02e-06	3.84e-06	LINC01291
ENSG00000143184	5.25802	-6.58014	1.3453	-4.8912	1e-06	3.78e-06	XCL1		ENSG00000244968	73.4186	0.585592	0.218747	2.67703	0.00742789	0.0176659	LIFR-AS1
ENSG00000172137	43.8883	-6.50222	0.67812	-9.5886	8.93e-22	8.22e-21	CALB2		ENSG00000148341	6352.03	0.585607	0.0457505	12.8	1.64e-37	2.73e-36	SH3GLB2
ENSG00000253554	6.02185	-6.40509	1.34205	-4.77264	1.82e-06	6.68e-06	LINC01414		ENSG00000139974	244.015	0.585877	0.117361	4.99211	5.97e-07	2.3e-06	SLC38A6
ENSG00000124249	7.88713	-6.40306	1.27182	-5.03457	4.79e-07	1.86e-06	KCNK15		ENSG00000174080	1309.45	0.585891	0.0607645	9.642	5.31e-22	4.95e-21	CTSF
ENSG00000101746	8.80362	-6.38833	1.26388	-5.05456	4.31e-07	1.68e-06	NOL4		ENSG00000114626	269.856	0.585903	0.144174	4.06387	4.83e-05	0.00015454	ABTB1
ENSG00000231424	4.55195	-6.34131	1.37075	-4.62616	3.73e-06	1.33e-05	BX284613.2		ENSG00000111261	817.547	0.586024	0.0680271	8.61457	7.02e-18	5.4e-17	MANSC1
ENSG00000236548	4.75952	-6.32228	1.3948	-4.53274	5.82e-06	2.04e-05	RNF217-AS1		ENSG00000188997	349.922	0.586212	0.1101	5.32438	1.01e-07	4.16e-07	KCTD21
ENSG00000154645	4.35664	-6.28809	1.38051	-4.55489	5.24e-06	1.85e-05	CHODL		ENSG00000272092	66.503	0.586474	0.205419	2.85502	0.00430344	0.0106688	AC087623.2
ENSG00000231165	3.84006	-6.15996	1.40348	-4.38906	1.14e-05	3.87e-05	TRBV26OR9-2		ENSG00000101474	7997.1	0.586499	0.0462694	12.6757	8.06e-37	1.3e-35	APMAP
ENSG00000205054	3.62385	-6.15005	1.4762	-4.16614	3.1e-05	0.000101005	LINC01121		ENSG00000169228	720.018	0.586789	0.0666525	8.80371	1.32e-18	1.06e-17	RAB24
ENSG00000239511	4.97527	-6.11123	1.34839	-4.53224	5.84e-06	2.04e-05	POM121L7P		ENSG00000108352	418.572	0.586949	0.0863536	6.79704	1.07e-11	5.85e-11	RAPGEFL1
ENSG00000002745	3.29588	-6.03955	1.42243	-4.24595	2.18e-05	7.21e-05	WNT16		ENSG00000114423	581.206	0.586954	0.0774686	7.57667	3.55e-14	2.25e-13	CBLB
ENSG00000171794	17.9245	-6.03746	0.904314	-6.67629	2.45e-11	1.31e-10	UTF1		ENSG00000118680	3669.81	0.587087	0.0441702	13.2915	2.59e-40	4.72e-39	MYL12B
ENSG00000184856	18.489	-5.87149	0.900566	-6.51978	7.04e-11	3.65e-10	LINC00308		ENSG00000119383	9141.93	0.587186	0.0392521	14.9593	1.35e-50	3.3e-49	PTPA
ENSG00000164176	7.1506	-5.87009	1.28503	-4.56805	4.92e-06	1.74e-05	EDIL3		ENSG00000139505	2597.36	0.587234	0.0456534	12.8629	7.28e-38	1.23e-36	MTMR6
ENSG00000206538	22.9891	-5.86477	0.775047	-7.56699	3.82e-14	2.41e-13	VGLL3		ENSG00000280187	485.969	0.587272	0.0811808	7.23413	4.69e-13	2.78e-12	AC022107.1
ENSG00000253181	2.5885	-5.78648	1.60424	-3.607	0.000309762	0.000897708	AC138356.3		ENSG00000159842	4074.41	0.587905	0.0485648	12.1056	9.87e-34	1.46e-32	ABR
ENSG00000227012	5.45576	-5.7443	1.33176	-4.31331	1.61e-05	5.4e-05	LINC02527		ENSG00000134824	22417.2	0.588121	0.069739	8.43317	3.36e-17	2.51e-16	FADS2
ENSG00000163331	3.31929	-5.7362	1.42826	-4.01621	5.91e-05	0.000187098	DAPL1		ENSG00000162804	966.386	0.588122	0.0735829	7.99264	1.32e-15	9.04e-15	SNED1
ENSG00000151322	14.7686	-5.73545	0.915205	-6.26685	3.68e-10	1.81e-09	NPAS3		ENSG00000214022	14122	0.588324	0.0418802	14.0478	7.95e-45	1.63e-43	REPIN1
ENSG00000150471	75.8056	-5.73328	0.416938	-13.7509	5.03e-43	9.84e-42	ADGRL3		ENSG00000105819	5269.09	0.588429	0.0481782	12.2136	2.63e-34	3.94e-33	PMPCB
ENSG00000047597	46.5942	-5.72434	0.527104	-10.86	1.79e-27	2.12e-26	XK		ENSG00000130675	1072.89	0.588871	0.0773011	7.61788	2.58e-14	1.65e-13	MNX1
ENSG00000135604	2.5554	-5.69201	1.57796	-3.60721	0.000309512	0.00089708	STX11		ENSG00000116133	30519.5	0.589477	0.0555024	10.6208	2.39e-26	2.7e-25	DHCR24
ENSG00000215162	2.65196	-5.68532	1.53454	-3.7049	0.000211474	0.000625055	LINC00269		ENSG00000179044	126.501	0.589485	0.168471	3.49902	0.000466969	0.00132331	EXOC3L1
ENSG00000275591	36.6714	-5.65977	0.635991	-8.89913	5.63e-19	4.56e-18	XKR5		ENSG00000137806	829.706	0.589533	0.0918296	6.41986	1.36e-10	6.92e-10	NDUFAF1
ENSG00000112333	15.6578	-5.64328	0.909777	-6.20292	5.54e-10	2.69e-09	NR2E1		ENSG00000246575	63.1313	0.589691	0.23206	2.54112	0.01105	0.0254353	AC093162.2
ENSG00000271133	3.32248	-5.63549	1.48179	-3.80318	0.000142852	0.000432219	AC004130.2		ENSG00000175806	230.353	0.590234	0.128191	4.60435	4.14e-06	1.47e-05	MSRA
ENSG00000269416	2.7369	-5.58597	1.55689	-3.58791	0.000333341	0.000963403	LINC01224		ENSG00000260806	101.239	0.590317	0.196377	3.00604	0.00264675	0.00675597	AL163051.1
ENSG00000175868	94.117	-5.5857	0.399134	-13.9946	1.68e-44	3.42e-43	CALCB		ENSG00000239305	878.446	0.590696	0.0659603	8.95533	3.39e-19	2.77e-18	RNF103
ENSG00000218896	2.11613	-5.57685	1.84752	-3.01857	0.00253972	0.00649966	TUBB8P2		ENSG00000146833	2636.71	0.590779	0.0444584	13.2884	2.7e-40	4.91e-39	TRIM4
ENSG00000217447	2.51004	-5.53706	1.55727	-3.55561	0.000377096	0.00108201	AL021331.1		ENSG00000110628	985.446	0.59086	0.111745	5.28759	1.24e-07	5.05e-07	SLC22A18
ENSG00000253414	120.365	-5.53358	0.346147	-15.9862	1.59e-57	4.62e-56	AC124067.2		ENSG00000105270	92.3664	0.590916	0.170706	3.4616	0.000536976	0.00150756	CLIP3
ENSG00000247416	4.70924	-5.52231	1.36023	-4.05984	4.91e-05	0.000157069	AP000802.1		ENSG00000255517	131.109	0.590956	0.15163	3.89735	9.73e-05	0.000300328	AP002748.4
ENSG00000168743	23.7476	-5.50658	0.779659	-7.06281	1.63e-12	9.42e-12	NPNT		ENSG00000226137	1540.31	0.591165	0.0672323	8.79287	1.46e-18	1.16e-17	BAIAP2-DT
ENSG00000183784	2.49056	-5.50298	1.50788	-3.64948	0.000262767	0.000767991	DOCK8-AS1		ENSG00000267649	52.9786	0.591301	0.215956	2.73806	0.00618023	0.0149049	AC010327.5
ENSG00000082482	11.6277	-5.43374	0.95507	-5.68936	1.28e-08	5.61e-08	KCNK2		ENSG00000174804	946.417	0.59157	0.0675708	8.75482	2.04e-18	1.61e-17	FZD4
ENSG00000196104	3.73714	-5.41076	1.4806	-3.65442	0.00025776	0.000754158	SPOCK3		ENSG00000257261	123.479	0.591598	0.176687	3.34827	0.000813167	0.00223302	AC008014.1
ENSG00000140937	2.56862	-5.40309	1.64253	-3.28948	0.00100372	0.00272363	CDH11		ENSG00000064042	18867.3	0.59174	0.041447	14.277	3.04e-46	6.58e-45	LIMCH1
ENSG00000169432	4.3986	-5.39646	1.3762	-3.92128	8.81e-05	0.000273511	SCN9A		ENSG00000177076	187.261	0.592115	0.134546	4.40085	1.08e-05	3.68e-05	ACER2
ENSG00000267723	2.08874	-5.3601	1.53896	-3.48294	0.000495941	0.00140079	AC011509.2		ENSG00000164062	5634.37	0.592309	0.0335024	17.6796	6.02e-70	2.32e-68	APEH
ENSG00000213543	2.16482	-5.3587	1.57853	-3.39474	0.000686946	0.0019041	RARRES2P2		ENSG00000109971	36453.5	0.59233	0.0618324	9.5796	9.74e-22	8.96e-21	HSPA8
ENSG00000241978	2.60624	-5.34431	1.54487	-3.45939	0.000541395	0.00151919	#N/A		ENSG00000187642	105.08	0.59246	0.187729	3.15593	0.00159986	0.00421805	PERM1
ENSG00000267034	4.36607	-5.32497	1.35432	-3.93184	8.43e-05	0.000262505	AC010980.1		ENSG00000176428	631.357	0.592546	0.077634	7.63255	2.3e-14	1.47e-13	VPS37D
ENSG00000251359	4.78486	-5.31541	1.40458	-3.78434	0.000154117	0.000463598	WWC2-AS2		ENSG00000008513	6930.76	0.592775	0.0378969	15.6418	3.78e-55	1.04e-53	ST3GAL1
ENSG00000134762	480.534	-5.299	0.154872	-34.2154	1.43e-256	8.19e-254	DSC3		ENSG00000101333	1096.73	0.592847	0.0628615	9.431	4.06e-21	3.63e-20	PLCB4
ENSG00000269068	2.4836	-5.29049	1.61452	-3.27683	0.00104981	0.00284057	AC009955.4		ENSG00000158715	7225.52	0.592881	0.0762553	7.77495	7.55e-15	4.96e-14	SLC45A3
ENSG00000277214	2.09667	-5.2864	1.5939	-3.31665	0.000911049	0.00248617	AC009159.2		ENSG00000137496	206.963	0.593185	0.13306	4.45804	8.27e-06	2.85e-05	IL18BP
ENSG00000145242	3.18859	-5.27887	1.50637	-3.50437	0.000457684	0.00129941	EPHA5		ENSG00000104093	1991.71	0.593457	0.0480913	12.3402	5.5e-35	8.46e-34	DMXL2
ENSG00000261172	3.88414	-5.2787	1.40057	-3.76898	0.000163918	0.000491576	AC133919.2		ENSG00000135250	3982.43	0.593608	0.0353225	16.8054	2.23e-63	7.39e-62	SRPK2
ENSG00000241313	1.55149	-5.27288	1.88858	-2.79198	0.00523873	0.012805	WWTR1-AS1		ENSG00000265749	83.9449	0.593864	0.169605	3.50146	0.000462713	0.0013122	AC135178.4
ENSG00000172817	7.59932	-5.23657	1.15699	-4.52604	6.01e-06	2.1e-05	CYP7B1		ENSG00000113558	4054.96	0.593926	0.051256	11.5874	4.77e-31	6.42e-30	SKP1
ENSG00000171243	3.92665	-5.23454	1.42049	-3.68502	0.000228686	0.00067296	SOSTDC1		ENSG00000136950	4613.09	0.594081	0.0404924	14.6714	9.83e-49	2.29e-47	ARPC5L
ENSG00000281333	2.58298	-5.21928	1.55681	-3.35256	0.000800688	0.00220095	AC024941.2		ENSG00000089163	54.3669	0.594085	0.251596	2.36127	0.0182126	0.0399269	SIRT4
ENSG00000155011	1.86533	-5.21688	1.56756	-3.32802	0.00087467	0.00239164	DKK2		ENSG00000131408	2014.51	0.594167	0.054881	10.8265	2.58e-27	3.04e-26	NR1H2
ENSG00000104722	391.449	-5.15898	0.164936	-31.2787	9.09e-215	3.16e-212	NEFM		ENSG00000111325	58.2716	0.594309	0.234653	2.53272	0.0113182	0.0260028	OGFOD2
ENSG00000224817	1.56184	-5.15648	1.86148	-2.7701	0.00560394	0.0136262	AC010789.1		ENSG00000131069	2112.43	0.594354	0.0649466	9.15143	5.62e-20	4.75e-19	ACSS2
ENSG00000143452	34.6868	-5.14551	0.562331	-9.15031	5.68e-20	4.79e-19	HORMAD1		ENSG00000148842	1222	0.594681	0.0721012	8.24787	1.61e-16	1.16e-15	CNNM2
ENSG00000235990	2.17878	-5.14094	1.51624	-3.39059	0.000697423	0.001931	RPL23AP20		ENSG00000197180	229.98	0.594797	0.133201	4.46541	7.99e-06	2.76e-05	AC244090.1
ENSG00000123096	38.6379	-5.14085	0.49336	-10.4201	2.01e-25	2.17e-24	SSPN		ENSG00000106245	2746.29	0.594865	0.0575673	10.3334	4.98e-25	5.3e-24	BUD31
ENSG00000280061	10.5826	-5.13467	0.978313	-5.2485	1.53e-07	6.2e-07	AC011504.1		ENSG00000228146	88.8455	0.595203	0.169424	3.51309	0.000442925	0.00125972	CASP16P
ENSG00000277764	1.81806	-5.13464	1.7876	-2.87237	0.00407407	0.0101376	AC007040.3		ENSG00000133937	118.259	0.595206	0.166069	3.58409	0.000338254	0.000976984	GSC
ENSG00000183722	59.3402	-5.09968	0.413954	-12.3194	7.12e-35	1.09e-33	LHFPL6		ENSG00000116209	4796.6	0.59533	0.0566055	10.5172	7.2e-26	7.98e-25	TMEM59
ENSG00000196668	17.8296	-5.0928	0.788787	-6.4565	1.07e-10	5.48e-10	LINC00173		ENSG00000178971	1122.01	0.595531	0.0680879	8.74651	2.2e-18	1.73e-17	CTC1
ENSG00000174015	7.14528	-5.08786	1.13433	-4.48535	7.28e-06	2.53e-05	SPERT		ENSG00000161642	697.12	0.595615	0.0876852	6.79265	1.1e-11	6.03e-11	ZNF385A
ENSG00000081041	1.09026	-5.08413	2.04655	-2.48425	0.0129826	0.0294743	CXCL2		ENSG00000108785	240.643	0.595666	0.135078	4.4098	1.03e-05	3.54e-05	HSD17B1P1
ENSG00000228952	2.6337	-5.07396	1.52084	-3.33629	0.000849056	0.00232461	LINC02041		ENSG00000177548	977.664	0.595694	0.0895093	6.65511	2.83e-11	1.51e-10	RABEP2
ENSG00000233080	2.194	-5.06825	1.50664	-3.36395	0.00076836	0.00211823	LINC01399		ENSG00000001629	2694.9	0.595827	0.0437023	13.6338	2.52e-42	4.86e-41	ANKIB1
ENSG00000163734	1.47956	-5.06673	1.77213	-2.85911	0.00424828	0.0105406	CXCL3		ENSG00000168610	4481.33	0.595945	0.0430972	13.8279	1.73e-43	3.41e-42	STAT3
ENSG00000232363	3.9045	-5.05168	1.42371	-3.54824	0.000387809	0.00111078	AL021391.1		ENSG00000154358	2316.38	0.595963	0.0796816	7.4793	7.47e-14	4.66e-13	OBSCN
ENSG00000157542	4.16931	-5.0354	1.35998	-3.70256	0.000213438	0.000630588	KCNJ6		ENSG00000260329	96.4493	0.595969	0.199285	2.99055	0.0027848	0.00708729	AC007541.1
ENSG00000186479	3.43234	-5.03472	1.438	-3.50119	0.000463183	0.00131339	RGS7BP		ENSG00000186792	442.625	0.595996	0.0926391	6.43352	1.25e-10	6.35e-10	HYAL3
ENSG00000231738	1.88892	-5.00873	1.76401	-2.8394	0.0045198	0.0111719	TSPAN19		ENSG00000196935	456.457	0.596022	0.0892407	6.67882	2.41e-11	1.29e-10	SRGAP1
ENSG00000169744	5.72257	-4.95811	1.18524	-4.1832	2.87e-05	9.4e-05	LDB2		ENSG00000205771	208.879	0.596236	0.139446	4.27576	1.9e-05	6.35e-05	CATSPER2P1
ENSG00000123689	62.6457	-4.95435	0.389466	-12.7209	4.53e-37	7.42e-36	G0S2		ENSG00000256043	179.609	0.596325	0.140491	4.24457	2.19e-05	7.25e-05	CTSO
ENSG00000079102	11.7245	-4.95099	0.835582	-5.9252	3.12e-09	1.43e-08	RUNX1T1		ENSG00000125347	223.933	0.596332	0.139003	4.29007	1.79e-05	5.97e-05	IRF1
ENSG00000234373	8.90088	-4.9424	0.964866	-5.12237	3.02e-07	1.19e-06	SNX18P7		ENSG00000167535	742.345	0.596439	0.0827185	7.21047	5.58e-13	3.3e-12	CACNB3
ENSG00000102678	30.9922	-4.94089	0.555823	-8.88933	6.15e-19	4.97e-18	FGF9		ENSG00000204514	295.366	0.596818	0.0989618	6.0308	1.63e-09	7.64e-09	ZNF814
ENSG00000281809	4.0463	-4.93793	1.41623	-3.48668	0.000489051	0.00138233	LINC01394		ENSG00000079691	1175.11	0.596968	0.0636424	9.38003	6.6e-21	5.82e-20	CARMIL1
ENSG00000101463	4.85935	-4.93545	1.21712	-4.05502	5.01e-05	0.000160175	SYNDIG1		ENSG00000087448	2688.18	0.597126	0.0384519	15.5292	2.2e-54	5.94e-53	KLHL42
ENSG00000261433	1.15736	-4.92083	2.09967	-2.34362	0.0190974	0.041654	AC002347.1		ENSG00000236829	69.296	0.597261	0.251917	2.37086	0.0177467	0.0390238	Z97634.1
ENSG00000249849	1.16222	-4.92054	1.84151	-2.672	0.00753996	0.0179138	AC138819.1		ENSG00000257108	169.666	0.597463	0.156687	3.81311	0.00013723	0.000416124	NHLRC4
ENSG00000170423	1.57552	-4.91805	1.69448	-2.90238	0.00370333	0.00926288	KRT78		ENSG00000183889	54.7096	0.597587	0.219219	2.72598	0.00641106	0.0154277	AC138969.1
ENSG00000214842	1.63015	-4.91417	1.66859	-2.9451	0.00322855	0.00813829	RAD51AP2		ENSG00000120913	268.367	0.597632	0.117878	5.06991	3.98e-07	1.56e-06	PDLIM2
ENSG00000204482	4.1416	-4.91071	1.462	-3.3589	0.000782542	0.0021543	LST1		ENSG00000074657	2244.51	0.598138	0.0661349	9.04421	1.51e-19	1.26e-18	ZNF532
ENSG00000151650	1.57149	-4.90424	1.79029	-2.73936	0.00615593	0.0148515	VENTX		ENSG00000114790	3696.43	0.598853	0.066142	9.05406	1.38e-19	1.15e-18	ARHGEF26
ENSG00000259954	1.56061	-4.88842	1.79642	-2.7212	0.00650457	0.0156288	IL21R-AS1		ENSG00000259429	221.012	0.59891	0.107946	5.54825	2.89e-08	1.24e-07	UBE2Q2P2
ENSG00000184005	52.7673	-4.86977	0.389767	-12.494	8.05e-36	1.27e-34	ST6GALNAC3		ENSG00000132326	765.811	0.59894	0.0970247	6.17307	6.7e-10	3.23e-09	PER2
ENSG00000136010	1737.93	-4.85358	0.0776071	-62.5404	0	0	ALDH1L2		ENSG00000196502	779.973	0.59916	0.0680016	8.81097	1.24e-18	9.91e-18	SULT1A1
ENSG00000164532	36.7129	-4.85104	0.465706	-10.4165	2.08e-25	2.25e-24	TBX20		ENSG00000058063	2986.87	0.599195	0.0400492	14.9615	1.31e-50	3.2e-49	ATP11B
ENSG00000226435	7.59612	-4.84868	1.18322	-4.09788	4.17e-05	0.000134411	ANKRD18DP		ENSG00000164197	44.0139	0.59939	0.244342	2.45308	0.0141639	0.0318928	RNF180
ENSG00000140873	3.2658	-4.84593	1.47618	-3.28274	0.00102804	0.00278633	ADAMTS18		ENSG00000237978	84.6991	0.599514	0.184697	3.24594	0.00117063	0.00315044	KCNMB2-AS1
ENSG00000162843	5.55894	-4.83851	1.20354	-4.02024	5.81e-05	0.000184089	WDR64		ENSG00000119943	250.186	0.599643	0.119741	5.00784	5.5e-07	2.13e-06	PYROXD2
ENSG00000238099	1.46488	-4.83792	1.84542	-2.62159	0.00875213	0.0205277	LINC01625		ENSG00000163462	181.956	0.599653	0.132655	4.52039	6.17e-06	2.16e-05	TRIM46
ENSG00000262619	1.48571	-4.83293	1.75816	-2.74886	0.00598033	0.0144647	LINC00621		ENSG00000106089	229.93	0.599913	0.116935	5.1303	2.89e-07	1.15e-06	STX1A
ENSG00000120645	1.5055	-4.82238	1.98351	-2.43123	0.0150475	0.033684	IQSEC3		ENSG00000270170	1180.06	0.600045	0.0827061	7.25515	4.01e-13	2.39e-12	NCBP2AS2
ENSG00000228546	1.74665	-4.80792	1.64278	-2.92669	0.00342585	0.00860878	AC091390.2		ENSG00000164404	90.4514	0.600123	0.169757	3.53518	0.000407499	0.00116451	GDF9
ENSG00000182674	14.4621	-4.7954	0.747334	-6.41668	1.39e-10	7.06e-10	KCNB2		ENSG00000171202	730.063	0.600174	0.0855836	7.01272	2.34e-12	1.34e-11	TMEM126A
ENSG00000161992	11.1088	-4.76805	0.824243	-5.78476	7.26e-09	3.25e-08	PRR35		ENSG00000204604	535.671	0.600357	0.0839764	7.14911	8.73e-13	5.11e-12	ZNF468
ENSG00000164619	7.72022	-4.7678	1.00384	-4.74958	2.04e-06	7.45e-06	BMPER		ENSG00000115425	532.912	0.600402	0.089529	6.70623	2e-11	1.08e-10	PECR
ENSG00000126950	3.50026	-4.76719	1.50627	-3.1649	0.00155135	0.00410222	TMEM35A		ENSG00000204618	63.2515	0.600797	0.204836	2.93306	0.00335642	0.00844358	RNF39
ENSG00000277586	402.816	-4.76562	0.145665	-32.7164	9.13e-235	4.12e-232	NEFL		ENSG00000183597	628.066	0.600881	0.0748836	8.02421	1.02e-15	7.04e-15	TANGO2
ENSG00000175161	14.2242	-4.75602	0.801697	-5.93244	2.98e-09	1.37e-08	CADM2		ENSG00000125966	176.487	0.600995	0.161277	3.72648	0.00019417	0.00057645	MMP24
ENSG00000196092	4.93394	-4.75414	1.18451	-4.01358	5.98e-05	0.000189103	PAX5		ENSG00000138376	1973.76	0.601004	0.0565724	10.6236	2.31e-26	2.62e-25	BARD1
ENSG00000155966	88.7947	-4.75118	0.296934	-16.0008	1.26e-57	3.66e-56	AFF2		ENSG00000135677	3517.89	0.601175	0.0559407	10.7467	6.14e-27	7.12e-26	GNS
ENSG00000134917	23.7233	-4.74428	0.589166	-8.05253	8.11e-16	5.62e-15	ADAMTS8		ENSG00000122026	28244.6	0.601264	0.0613122	9.80659	1.05e-22	1.02e-21	RPL21
ENSG00000279609	1.40934	-4.74004	1.87028	-2.53441	0.0112637	0.0258906	AL158070.2		ENSG00000131471	49.3987	0.601358	0.246291	2.44166	0.0146201	0.0328232	AOC3
ENSG00000267662	1.5886	-4.73792	1.75757	-2.69572	0.00702358	0.0167754	AC025809.1		ENSG00000268364	41.3283	0.601581	0.260942	2.30542	0.021143	0.0456845	SMC5-AS1
ENSG00000157445	77.222	-4.73375	0.326914	-14.4801	1.62e-47	3.64e-46	CACNA2D3		ENSG00000126821	2261.55	0.601624	0.0454995	13.2227	6.49e-40	1.16e-38	SGPP1
ENSG00000272138	6.55039	-4.73032	1.15942	-4.07991	4.51e-05	0.000144744	LINC01607		ENSG00000161921	1637.22	0.601664	0.0548172	10.9758	4.99e-28	6.03e-27	CXCL16
ENSG00000250838	3.48767	-4.72926	1.43236	-3.30173	0.00096092	0.00261447	AC091133.3		ENSG00000139899	64.8416	0.602009	0.234967	2.5621	0.010404	0.0240532	CBLN3
ENSG00000280304	1.84088	-4.72784	1.82046	-2.59706	0.00940247	0.0219128	AC104260.2		ENSG00000260121	130.957	0.602248	0.154561	3.8965	9.76e-05	0.00030128	AC138028.4
ENSG00000165349	183.574	-4.72454	0.213732	-22.1049	2.83e-108	2.28e-106	SLC7A3		ENSG00000114395	562.238	0.602449	0.098714	6.10298	1.04e-09	4.96e-09	CYB561D2
ENSG00000138075	3.9794	-4.72411	1.40042	-3.37336	0.000742563	0.00204999	ABCG5		ENSG00000186806	289.133	0.602548	0.1707	3.52986	0.000415784	0.00118695	VSIG10L
ENSG00000272502	2.59723	-4.72252	1.48604	-3.17791	0.00148341	0.00393557	AC104958.2		ENSG00000235314	157.699	0.602555	0.158561	3.80016	0.000144604	0.000437233	LINC00957
ENSG00000104321	2.76282	-4.72173	1.4644	-3.22435	0.0012626	0.0033814	TRPA1		ENSG00000100890	165.249	0.602702	0.14654	4.11288	3.91e-05	0.000126336	PRORP
ENSG00000232320	3.66814	-4.71935	1.49316	-3.16065	0.00157416	0.0041563	AC009299.2		ENSG00000140280	506.838	0.60312	0.0926659	6.50854	7.59e-11	3.92e-10	LYSMD2
ENSG00000280294	3.61054	-4.71731	1.43582	-3.28543	0.00101825	0.00276145	AC011008.2		ENSG00000224597	396.033	0.603384	0.0887203	6.80098	1.04e-11	5.7e-11	SVIL-AS1
ENSG00000253821	1.53738	-4.71695	1.89787	-2.48538	0.0129412	0.02939	AC090796.1		ENSG00000138119	141.285	0.603542	0.171375	3.52177	0.000428677	0.00122185	MYOF
ENSG00000088386	1.4543	-4.71195	1.84806	-2.54967	0.0107824	0.024859	SLC15A1		ENSG00000197815	71.3633	0.603574	0.226431	2.6656	0.00768509	0.0182366	AC122129.1
ENSG00000280107	18.0676	-4.7092	0.692497	-6.80032	1.04e-11	5.73e-11	AL022393.1		ENSG00000171109	2691.86	0.603919	0.0472149	12.7909	1.84e-37	3.07e-36	MFN1
ENSG00000267383	3.58748	-4.70765	1.42883	-3.29475	0.000985098	0.00267624	AC011447.3		ENSG00000111424	1110.87	0.604023	0.0689828	8.75614	2.02e-18	1.6e-17	VDR
ENSG00000108830	74.7591	-4.70056	0.325223	-14.4533	2.39e-47	5.34e-46	RND2		ENSG00000261474	72.1617	0.604037	0.188184	3.20983	0.00132815	0.00354755	AC026471.4
ENSG00000280310	14.5045	-4.7004	0.75103	-6.25861	3.88e-10	1.91e-09	AC092437.1		ENSG00000160326	779.812	0.604614	0.0721051	8.38518	5.06e-17	3.74e-16	SLC2A6
ENSG00000237452	22.8443	-4.69087	0.572023	-8.20049	2.39e-16	1.7e-15	BHMG1		ENSG00000076864	743.722	0.604843	0.0882287	6.8554	7.11e-12	3.95e-11	RAP1GAP
ENSG00000244256	2.52663	-4.68445	1.49601	-3.13129	0.00174043	0.00456067	RN7SL130P		ENSG00000242086	522.571	0.605235	0.0902474	6.7064	1.99e-11	1.07e-10	MUC20-OT1
ENSG00000274642	2.66217	-4.68349	1.55607	-3.00983	0.00261398	0.00667914	AC244669.2		ENSG00000105612	2351.74	0.60549	0.0508151	11.9156	9.82e-33	1.4e-31	DNASE2
ENSG00000261488	8.15249	-4.68081	0.991353	-4.72163	2.34e-06	8.51e-06	TBILA		ENSG00000170759	11208.4	0.605591	0.0332347	18.2216	3.48e-74	1.48e-72	KIF5B
ENSG00000166292	17.8087	-4.6757	0.720662	-6.48807	8.69e-11	4.48e-10	TMEM100		ENSG00000170004	7662.16	0.605656	0.0474831	12.7552	2.92e-37	4.82e-36	CHD3
ENSG00000236073	6.68233	-4.65781	1.01538	-4.58727	4.49e-06	1.59e-05	AL627311.1		ENSG00000141665	44.9185	0.605699	0.242927	2.49333	0.012655	0.0288139	FBXO15
ENSG00000266446	1.8567	-4.64344	1.65223	-2.81041	0.00494789	0.0121459	AL449423.1		ENSG00000160963	627.032	0.605934	0.0927656	6.53188	6.49e-11	3.38e-10	COL26A1
ENSG00000271830	1.23079	-4.64037	1.79347	-2.58737	0.00967124	0.0224972	AC012213.4		ENSG00000169083	4691.97	0.607081	0.0455187	13.3369	1.41e-40	2.59e-39	AR
ENSG00000187773	1.73844	-4.63933	1.63321	-2.84062	0.00450256	0.0111343	DIPK1C		ENSG00000135406	112.493	0.60732	0.165213	3.67597	0.000236948	0.000696528	PRPH
ENSG00000125533	1.38046	-4.63687	2.01512	-2.30104	0.0213895	0.0461626	BHLHE23		ENSG00000258708	124.218	0.607399	0.173398	3.50293	0.000460171	0.00130566	SLC25A21-AS1
ENSG00000051523	298.689	-4.63214	0.185813	-24.9291	3.6e-137	4.54e-135	CYBA		ENSG00000278704	70.2049	0.607402	0.227169	2.67379	0.00749989	0.0178264	BX004987.1
ENSG00000254639	1.71348	-4.62563	1.60904	-2.87477	0.00404316	0.0100689	AC116021.1		ENSG00000226950	2783.99	0.607685	0.0600382	10.1216	4.43e-24	4.53e-23	DANCR
ENSG00000259362	1.86498	-4.6235	1.73366	-2.66689	0.00765556	0.0181717	AC046168.1		ENSG00000124172	5299.3	0.607975	0.0835993	7.2725	3.53e-13	2.11e-12	ATP5F1E
ENSG00000154678	4.03835	-4.61972	1.42191	-3.24895	0.00115833	0.00311857	PDE1C		ENSG00000111678	874.396	0.608032	0.0985883	6.16738	6.94e-10	3.34e-09	C12orf57
ENSG00000166869	2.84584	-4.61822	1.43487	-3.21857	0.00128831	0.00344555	CHP2		ENSG00000147592	1039.82	0.608171	0.0978266	6.21682	5.07e-10	2.47e-09	LACTB2
ENSG00000269514	3.14725	-4.61519	1.47934	-3.11975	0.00181003	0.00473223	AC024257.3		ENSG00000163738	492.186	0.608226	0.0940121	6.46966	9.82e-11	5.04e-10	MTHFD2L
ENSG00000138449	25.0578	-4.5918	0.538752	-8.52303	1.55e-17	1.18e-16	SLC40A1		ENSG00000165424	1354.86	0.6083	0.0524279	11.6026	4e-31	5.4e-30	ZCCHC24
ENSG00000196569	8.62618	-4.58256	0.98571	-4.649	3.34e-06	1.2e-05	LAMA2		ENSG00000035664	167.07	0.608315	0.13633	4.46206	8.12e-06	2.8e-05	DAPK2
ENSG00000115828	51.9324	-4.57664	0.383386	-11.9374	7.55e-33	1.08e-31	QPCT		ENSG00000233901	44.2646	0.608613	0.254145	2.39475	0.0166317	0.036846	LINC01503
ENSG00000124212	17.1514	-4.56972	0.60829	-7.5124	5.81e-14	3.64e-13	PTGIS		ENSG00000169738	5305.44	0.60912	0.0552511	11.0246	2.91e-28	3.54e-27	DCXR
ENSG00000102195	47.7637	-4.5696	0.39386	-11.6021	4.02e-31	5.43e-30	GPR50		ENSG00000178449	1229.4	0.6092	0.0840798	7.24549	4.31e-13	2.57e-12	COX14
ENSG00000169594	27.3481	-4.56666	0.524131	-8.71281	2.96e-18	2.32e-17	BNC1		ENSG00000225313	36.241	0.609556	0.248848	2.44951	0.0143052	0.0321821	AL513327.1
ENSG00000219392	2.47645	-4.56511	1.50853	-3.0262	0.00247647	0.00634844	ZNF602P		ENSG00000274290	95.4278	0.610371	0.189965	3.21307	0.00131323	0.00350948	HIST1H2BE
ENSG00000199906	2.79374	-4.56436	1.4797	-3.08464	0.00203795	0.00528841	RNU5B-2P		ENSG00000136783	1381.59	0.610407	0.0657472	9.28415	1.63e-20	1.41e-19	NIPSNAP3A
ENSG00000180828	2.65431	-4.56369	1.51299	-3.01634	0.00255847	0.00654704	BHLHE22		ENSG00000165548	703.468	0.610876	0.076744	7.95993	1.72e-15	1.17e-14	TMEM63C
ENSG00000136014	80.2413	-4.55047	0.317484	-14.3329	1.36e-46	2.97e-45	USP44		ENSG00000105520	1540.97	0.611068	0.0813414	7.51238	5.81e-14	3.64e-13	PLPPR2
ENSG00000133636	1.55558	-4.54698	1.80036	-2.52559	0.0115504	0.0264941	NTS		ENSG00000114107	1183.21	0.611405	0.0558491	10.9474	6.84e-28	8.21e-27	CEP70
ENSG00000164691	3.74228	-4.53519	1.346	-3.36939	0.000753348	0.0020783	TAGAP		ENSG00000130147	2347.78	0.611493	0.0527235	11.5981	4.21e-31	5.68e-30	SH3BP4
ENSG00000189127	27.9436	-4.53167	0.492086	-9.20911	3.29e-20	2.81e-19	ANKRD34B		ENSG00000214253	5230.07	0.611603	0.0407772	14.9987	7.49e-51	1.85e-49	FIS1
ENSG00000134873	1.43169	-4.53155	1.71283	-2.64564	0.00815356	0.0192453	CLDN10		ENSG00000222020	59.4963	0.611803	0.252853	2.4196	0.0155377	0.0346682	HDAC4-AS1
ENSG00000170419	7.4631	-4.52908	1.16437	-3.88972	0.000100359	0.000309267	VSTM2A		ENSG00000070214	3086.82	0.612021	0.0581473	10.5253	6.6e-26	7.32e-25	SLC44A1
ENSG00000263515	2.1671	-4.52011	1.5882	-2.84606	0.00442635	0.0109586	MIR548AN		ENSG00000162542	1012.93	0.612139	0.0609433	10.0444	9.72e-24	9.82e-23	TMCO4
ENSG00000243429	1.86484	-4.51804	1.82942	-2.46966	0.0135242	0.0305676	OR7E29P		ENSG00000011198	508.367	0.61219	0.0804399	7.61053	2.73e-14	1.74e-13	ABHD5
ENSG00000271825	1.77784	-4.51696	1.59469	-2.8325	0.00461849	0.0114001	AC019080.4		ENSG00000197302	465.808	0.612391	0.100299	6.10565	1.02e-09	4.88e-09	ZNF720
ENSG00000140090	60.7	-4.51418	0.365849	-12.3389	5.59e-35	8.6e-34	SLC24A4		ENSG00000197822	1064	0.612939	0.0562082	10.9048	1.09e-27	1.3e-26	OCLN
ENSG00000231991	1.41852	-4.50722	1.81594	-2.48204	0.0130633	0.0296307	ANXA2P2		ENSG00000274561	45.7104	0.613067	0.261917	2.34069	0.0192481	0.0419693	AC005332.3
ENSG00000253477	2.81095	-4.50722	1.46233	-3.08222	0.00205466	0.00532823	AC012213.1		ENSG00000198874	1473.64	0.613168	0.0481152	12.7437	3.38e-37	5.56e-36	TYW1
ENSG00000225554	2.42428	-4.50425	1.51883	-2.9656	0.00302095	0.00764863	#N/A		ENSG00000127184	11516.4	0.613272	0.132231	4.6379	3.52e-06	1.26e-05	COX7C
ENSG00000254944	2.81273	-4.50234	1.48502	-3.03184	0.0024307	0.00623517	ATP5PBP5		ENSG00000110057	1145.8	0.613275	0.0751061	8.16545	3.2e-16	2.26e-15	UNC93B1
ENSG00000237125	2.4183	-4.50222	1.66809	-2.69902	0.00695439	0.0166275	HAND2-AS1		ENSG00000083642	2657.51	0.613407	0.0452528	13.5551	7.39e-42	1.4e-40	PDS5B
ENSG00000116176	8.40477	-4.50153	0.965053	-4.66454	3.09e-06	1.11e-05	TPSG1		ENSG00000102390	629.232	0.614218	0.0702565	8.74251	2.28e-18	1.79e-17	PBDC1
ENSG00000135547	105.857	-4.49712	0.258161	-17.4198	5.84e-68	2.15e-66	HEY2		ENSG00000184672	81.4477	0.614252	0.21862	2.80968	0.00495911	0.0121724	RALYL
ENSG00000277103	4.55077	-4.49399	1.43801	-3.12515	0.00177714	0.00465112	AL445670.1		ENSG00000182117	2500.31	0.614273	0.0702638	8.74239	2.28e-18	1.8e-17	NOP10
ENSG00000233608	33.9361	-4.49211	0.462724	-9.70798	2.79e-22	2.63e-21	TWIST2		ENSG00000135211	373.315	0.614406	0.114615	5.36061	8.29e-08	3.43e-07	TMEM60
ENSG00000175567	237.001	-4.48668	0.191499	-23.4293	2.15e-121	2.16e-119	UCP2		ENSG00000188064	592.506	0.614709	0.0893567	6.87927	6.02e-12	3.35e-11	WNT7B
ENSG00000237732	9.27678	-4.4808	0.854354	-5.24466	1.57e-07	6.33e-07	CT75		ENSG00000128891	398.861	0.614849	0.0963383	6.38219	1.75e-10	8.8e-10	CCDC32
ENSG00000279929	7.02967	-4.47655	1.04478	-4.2847	1.83e-05	6.11e-05	AL354796.1		ENSG00000243819	46.6047	0.614991	0.26841	2.29123	0.0219499	0.047257	RN7SL832P
ENSG00000107014	7.27615	-4.46883	0.98748	-4.52549	6.03e-06	2.11e-05	RLN2		ENSG00000260597	193.755	0.615028	0.142273	4.32288	1.54e-05	5.18e-05	AC012531.1
ENSG00000150551	21.7339	-4.46738	0.51963	-8.59724	8.17e-18	6.27e-17	LYPD1		ENSG00000129235	1511.04	0.615319	0.135204	4.55105	5.34e-06	1.88e-05	TXNDC17
ENSG00000100433	7.67456	-4.45752	0.996088	-4.47503	7.64e-06	2.64e-05	KCNK10		ENSG00000198807	459.272	0.615364	0.0835932	7.36142	1.82e-13	1.11e-12	PAX9
ENSG00000170542	15.6922	-4.45572	0.661086	-6.73999	1.58e-11	8.58e-11	SERPINB9		ENSG00000156050	384.472	0.615808	0.0957917	6.42861	1.29e-10	6.55e-10	FAM161B
ENSG00000269694	2.96359	-4.45287	1.54644	-2.87944	0.00398381	0.00992738	AC005197.1		ENSG00000231721	186.19	0.615873	0.152758	4.03169	5.54e-05	0.000175933	LINC-PINT
ENSG00000183246	2.90634	-4.45143	1.41917	-3.13665	0.00170888	0.00448315	RIMBP3C		ENSG00000120549	516.537	0.615902	0.0777294	7.92367	2.31e-15	1.56e-14	KIAA1217
ENSG00000128918	269.818	-4.4459	0.161288	-27.565	2.92e-167	5.54e-165	ALDH1A2		ENSG00000041802	1892.5	0.615943	0.0467739	13.1685	1.33e-39	2.36e-38	LSG1
ENSG00000242675	19.1464	-4.44477	0.593806	-7.48523	7.14e-14	4.46e-13	RPS16P9		ENSG00000182272	1902.3	0.616046	0.0600816	10.2535	1.14e-24	1.19e-23	B4GALNT4
ENSG00000176049	85.7463	-4.44137	0.295522	-15.0289	4.75e-51	1.18e-49	JAKMIP2		ENSG00000197279	147.458	0.616117	0.132647	4.6448	3.4e-06	1.22e-05	ZNF165
ENSG00000261375	1.83216	-4.43895	1.57427	-2.81969	0.004807	0.0118297	AC135983.4		ENSG00000185909	562.646	0.616269	0.0837264	7.36051	1.83e-13	1.11e-12	KLHDC8B
ENSG00000132429	180.718	-4.4385	0.203087	-21.8552	6.94e-106	5.4e-104	POPDC3		ENSG00000279233	159.309	0.616568	0.161912	3.80804	0.000140072	0.000424042	AC122688.3
ENSG00000117152	2.19618	-4.4292	1.52362	-2.90702	0.00364895	0.00913683	RGS4		ENSG00000231345	142.162	0.616633	0.14783	4.17121	3.03e-05	9.89e-05	BEND3P1
ENSG00000234405	4.61454	-4.42622	1.19146	-3.71497	0.000203232	0.000601857	Z69733.1		ENSG00000105550	314.937	0.616874	0.112906	5.46362	4.67e-08	1.97e-07	FGF21
ENSG00000228414	4.07025	-4.42372	1.2082	-3.66142	0.000250825	0.000735434	LINC01185		ENSG00000243660	105.979	0.616883	0.180758	3.41275	0.000643104	0.00178979	ZNF487
ENSG00000184368	329.034	-4.42298	0.148753	-29.7336	2.82e-194	7.92e-192	MAP7D2		ENSG00000188483	235.377	0.616936	0.116675	5.28764	1.24e-07	5.05e-07	IER5L
ENSG00000146151	5.46625	-4.41705	1.195	-3.69629	0.000218773	0.00064531	HMGCLL1		ENSG00000228340	67.8448	0.617035	0.209035	2.95183	0.00315895	0.00797628	MIR646HG
ENSG00000276298	1.34009	-4.41469	1.65699	-2.66428	0.00771533	0.018302	AC234782.4		ENSG00000027001	1765.09	0.617466	0.0670282	9.21203	3.2e-20	2.74e-19	MIPEP
ENSG00000136732	251.674	-4.40707	0.187527	-23.501	3.98e-122	4.04e-120	GYPC		ENSG00000110911	2864.14	0.617689	0.042958	14.3789	7.02e-47	1.54e-45	SLC11A2
ENSG00000152092	31.311	-4.40645	0.463987	-9.49692	2.16e-21	1.95e-20	ASTN1		ENSG00000185485	460.091	0.61777	0.0853348	7.23936	4.51e-13	2.68e-12	SDHAP1
ENSG00000255394	2.93212	-4.40131	1.46415	-3.00605	0.00264666	0.00675597	C8orf49		ENSG00000228526	159.952	0.61781	0.130809	4.723	2.32e-06	8.46e-06	MIR34AHG
ENSG00000268889	1.86223	-4.39243	1.57875	-2.78222	0.00539878	0.0131681	AC008750.7		ENSG00000076685	1643.97	0.617953	0.0462314	13.3665	9.49e-41	1.75e-39	NT5C2
ENSG00000106278	10.9764	-4.39232	0.835936	-5.25437	1.49e-07	6.02e-07	PTPRZ1		ENSG00000281357	134.749	0.618178	0.160587	3.84948	0.000118367	0.000361922	ARRDC3-AS1
ENSG00000151892	46.3226	-4.38005	0.377265	-11.61	3.67e-31	4.96e-30	GFRA1		ENSG00000277283	133.365	0.618312	0.164351	3.76216	0.000168455	0.000504577	AC004812.2
ENSG00000164236	96.4047	-4.37829	0.258189	-16.9577	1.69e-64	5.83e-63	ANKRD33B		ENSG00000237094	50.6447	0.618382	0.24659	2.50773	0.0121509	0.0277489	AL732372.2
ENSG00000229536	4.20329	-4.35786	1.22511	-3.55713	0.000374931	0.00107625	LINC02572		ENSG00000126522	882.151	0.618475	0.0706391	8.75542	2.03e-18	1.6e-17	ASL
ENSG00000172020	4.09208	-4.35704	1.22351	-3.56109	0.000369313	0.00106101	GAP43		ENSG00000260097	75.7172	0.618479	0.214538	2.88284	0.00394106	0.00982797	SPDYE6
ENSG00000196711	48.6531	-4.35206	0.386757	-11.2527	2.25e-29	2.85e-28	ALKAL1		ENSG00000151729	2557.85	0.618848	0.0535235	11.5622	6.41e-31	8.59e-30	SLC25A4
ENSG00000122574	80.2136	-4.34969	0.301562	-14.4238	3.66e-47	8.15e-46	WIPF3		ENSG00000196177	2764.05	0.61894	0.0492394	12.57	3.09e-36	4.92e-35	ACADSB
ENSG00000053328	6.95449	-4.3413	0.98849	-4.39185	1.12e-05	3.83e-05	METTL24		ENSG00000187624	104.675	0.619386	0.173817	3.56345	0.000366019	0.00105242	C17orf97
ENSG00000145642	7.58179	-4.33976	0.955251	-4.54306	5.54e-06	1.95e-05	SHISAL2B		ENSG00000175894	84.2748	0.619425	0.174475	3.55023	0.000384897	0.00110313	TSPEAR
ENSG00000171246	210.605	-4.33326	0.187765	-23.0781	7.69e-118	7.37e-116	NPTX1		ENSG00000197162	146.554	0.619439	0.178657	3.46721	0.0005259	0.00147873	ZNF785
ENSG00000237505	15.9226	-4.32989	0.625616	-6.92101	4.48e-12	2.52e-11	PKN2-AS1		ENSG00000113758	6416.13	0.61954	0.0390998	15.8451	1.52e-56	4.32e-55	DBN1
ENSG00000117598	2.07957	-4.32482	1.55027	-2.78972	0.00527531	0.0128841	PLPPR5		ENSG00000157916	3646.98	0.619885	0.041138	15.0684	2.61e-51	6.52e-50	RER1
ENSG00000123999	10.9951	-4.3246	0.860996	-5.02279	5.09e-07	1.97e-06	INHA		ENSG00000144455	592.122	0.619995	0.0802226	7.72843	1.09e-14	7.09e-14	SUMF1
ENSG00000121236	43.7907	-4.32167	0.383211	-11.2775	1.69e-29	2.16e-28	TRIM6		ENSG00000126107	1368.49	0.620241	0.0564029	10.9966	3.97e-28	4.8e-27	HECTD3
ENSG00000142494	163.855	-4.32016	0.203347	-21.2452	3.65e-100	2.59e-98	SLC47A1		ENSG00000104835	65.8157	0.620466	0.220684	2.81156	0.00493016	0.0121046	SARS2
ENSG00000077943	110.165	-4.31968	0.256662	-16.8302	1.47e-63	4.91e-62	ITGA8		ENSG00000272899	112.545	0.620574	0.165065	3.75958	0.000170199	0.000509356	ATP6V1FNB
ENSG00000182533	20.2104	-4.31428	0.582151	-7.41092	1.25e-13	7.71e-13	CAV3		ENSG00000173327	2953.12	0.620766	0.0487838	12.7248	4.3e-37	7.07e-36	MAP3K11
ENSG00000198400	6.33485	-4.31397	1.02029	-4.22817	2.36e-05	7.77e-05	NTRK1		ENSG00000143344	154.901	0.620825	0.149104	4.1637	3.13e-05	0.000102029	RGL1
ENSG00000277010	1.50123	-4.30999	1.89863	-2.27005	0.0232047	0.0497133	AC120498.10		ENSG00000185187	1852.52	0.620852	0.0548099	11.3274	9.61e-30	1.23e-28	SIGIRR
ENSG00000173404	77.6781	-4.30511	0.303222	-14.1979	9.45e-46	2e-44	INSM1		ENSG00000254531	347.31	0.620877	0.114331	5.43054	5.62e-08	2.36e-07	AP001816.1
ENSG00000139174	40.9521	-4.30352	0.375948	-11.4471	2.43e-30	3.2e-29	PRICKLE1		ENSG00000186056	107.688	0.621018	0.15445	4.02084	5.8e-05	0.000183684	MATN1-AS1
ENSG00000249509	9.19667	-4.30342	0.878753	-4.89718	9.72e-07	3.67e-06	AC023886.1		ENSG00000151116	962.743	0.621117	0.0643304	9.65512	4.68e-22	4.37e-21	UEVLD
ENSG00000229407	1.78971	-4.29351	1.74215	-2.46449	0.0137209	0.0309766	AL359853.1		ENSG00000165171	509.997	0.62131	0.0865765	7.17643	7.16e-13	4.21e-12	METTL27
ENSG00000186912	1.77997	-4.28899	1.68263	-2.54898	0.010804	0.0249067	P2RY4		ENSG00000226738	51.8129	0.621366	0.222598	2.79142	0.00524768	0.0128246	#N/A
ENSG00000183287	21.1122	-4.28303	0.589757	-7.26238	3.8e-13	2.27e-12	CCBE1		ENSG00000215158	277.681	0.621472	0.122717	5.06427	4.1e-07	1.6e-06	AC138409.2
ENSG00000131080	38.9893	-4.28001	0.455645	-9.39329	5.82e-21	5.15e-20	EDA2R		ENSG00000134627	140.881	0.621505	0.14497	4.28714	1.81e-05	6.04e-05	PIWIL4
ENSG00000234080	1.38187	-4.27561	1.66537	-2.56737	0.0102473	0.0237188	AL596275.1		ENSG00000118369	600.337	0.621774	0.0864084	7.19576	6.21e-13	3.67e-12	USP35
ENSG00000104267	324.778	-4.2738	0.145807	-29.3114	7.43e-189	1.93e-186	CA2		ENSG00000204580	4132.82	0.621861	0.0569819	10.9133	9.96e-28	1.19e-26	DDR1
ENSG00000119866	164.615	-4.27267	0.198693	-21.5039	1.43e-102	1.06e-100	BCL11A		ENSG00000214176	471.116	0.621865	0.0950887	6.53984	6.16e-11	3.21e-10	PLEKHM1P1
ENSG00000266145	2.04914	-4.27181	1.62258	-2.63272	0.00847031	0.0199313	RHOT1P1		ENSG00000197063	2595.93	0.621912	0.0375849	16.5469	1.69e-61	5.35e-60	MAFG
ENSG00000241418	6.22969	-4.27051	0.982245	-4.34771	1.38e-05	4.64e-05	MCRIP2P1		ENSG00000135315	239.181	0.622642	0.110743	5.62242	1.88e-08	8.17e-08	CEP162
ENSG00000255690	1.87109	-4.26918	1.62475	-2.6276	0.00859907	0.0201997	TRIL		ENSG00000104081	200.483	0.622685	0.1332	4.6748	2.94e-06	1.06e-05	BMF
ENSG00000266385	2.60911	-4.26858	1.53163	-2.78695	0.00532072	0.0129892	AC005899.5		ENSG00000157881	1799.43	0.622863	0.0543866	11.4525	2.28e-30	3.01e-29	PANK4
ENSG00000126733	18.696	-4.2671	0.660692	-6.45853	1.06e-10	5.41e-10	DACH2		ENSG00000104763	2505.91	0.62294	0.0545473	11.4202	3.32e-30	4.35e-29	ASAH1
ENSG00000281091	13.3952	-4.26477	0.666678	-6.39705	1.58e-10	8e-10	AL117327.1		ENSG00000273329	344.766	0.623049	0.11401	5.46484	4.63e-08	1.96e-07	AC078846.1
ENSG00000157927	113.805	-4.2643	0.24076	-17.7119	3.4e-70	1.33e-68	RADIL		ENSG00000254614	75.3539	0.623282	0.245903	2.53466	0.0112555	0.0258738	AP003068.2
ENSG00000254293	2.18786	-4.26098	1.5714	-2.71158	0.0066964	0.0160582	AC026688.2		ENSG00000120686	5282.65	0.623441	0.0383554	16.2543	2.08e-59	6.27e-58	UFM1
ENSG00000281106	2.09576	-4.25575	1.57825	-2.6965	0.00700718	0.0167392	TMEM272		ENSG00000127561	1177.19	0.623493	0.0731452	8.52404	1.54e-17	1.17e-16	SYNGR3
ENSG00000227542	2.07949	-4.25546	1.68132	-2.53103	0.0113729	0.0261154	AC092614.1		ENSG00000277149	108.882	0.623554	0.165625	3.76485	0.000166649	0.000499328	TYW1B
ENSG00000174370	37.1735	-4.25127	0.414949	-10.2453	1.24e-24	1.3e-23	C11orf45		ENSG00000165215	2648.66	0.62358	0.0664192	9.38855	6.08e-21	5.38e-20	CLDN3
ENSG00000113196	146.259	-4.24937	0.215508	-19.718	1.51e-86	8.36e-85	HAND1		ENSG00000221926	817.329	0.623815	0.0634689	9.82867	8.47e-23	8.23e-22	TRIM16
ENSG00000259495	61.8037	-4.2439	0.331379	-12.8068	1.5e-37	2.51e-36	AC016705.2		ENSG00000006576	1421.04	0.623871	0.0558081	11.1789	5.17e-29	6.49e-28	PHTF2
ENSG00000129596	53.3762	-4.24335	0.341499	-12.4257	1.9e-35	2.96e-34	CDO1		ENSG00000137942	2107.53	0.624292	0.0536951	11.6266	3.02e-31	4.1e-30	FNBP1L
ENSG00000224243	2.87981	-4.24047	1.30153	-3.25808	0.00112169	0.00302495	SOX1-OT		ENSG00000105136	398.834	0.624418	0.0839558	7.43745	1.03e-13	6.35e-13	ZNF419
ENSG00000228214	6.41577	-4.23436	1.05144	-4.02721	5.64e-05	0.000179157	#N/A		ENSG00000221968	930.791	0.624865	0.0681969	9.16266	5.06e-20	4.29e-19	FADS3
ENSG00000013588	16.5848	-4.2264	0.636928	-6.6356	3.23e-11	1.71e-10	GPRC5A		ENSG00000137198	291.907	0.625048	0.119399	5.23494	1.65e-07	6.66e-07	GMPR
ENSG00000168702	152.262	-4.22507	0.210143	-20.1057	6.57e-90	3.87e-88	LRP1B		ENSG00000171867	3083.98	0.625349	0.0526471	11.8781	1.54e-32	2.18e-31	PRNP
ENSG00000078399	241.191	-4.22483	0.175904	-24.0178	1.81e-127	1.96e-125	HOXA9		ENSG00000210082	319154	0.625808	0.0563555	11.1046	1.19e-28	1.47e-27	MT-RNR2
ENSG00000120262	31.9975	-4.22218	0.437079	-9.66	4.46e-22	4.17e-21	CCDC170		ENSG00000258704	39.0166	0.625975	0.274584	2.27972	0.0226242	0.0485756	SRP54-AS1
ENSG00000264176	4.44296	-4.20991	1.20748	-3.48651	0.000489358	0.00138305	MAGOH2P		ENSG00000133256	72.3291	0.626275	0.212421	2.94828	0.0031955	0.00806013	PDE6B
ENSG00000106013	15.4951	-4.20798	0.688447	-6.11228	9.82e-10	4.68e-09	ANKRD7		ENSG00000186187	743.949	0.626919	0.0791503	7.92062	2.36e-15	1.59e-14	ZNRF1
ENSG00000100979	413.279	-4.20744	0.152802	-27.5351	6.67e-167	1.26e-164	PLTP		ENSG00000064547	288.433	0.627011	0.125466	4.99744	5.81e-07	2.24e-06	LPAR2
ENSG00000272583	1.98398	-4.19579	1.63388	-2.56799	0.0102289	0.0236823	AL592494.2		ENSG00000165630	284.6	0.62716	0.108854	5.76148	8.34e-09	3.72e-08	PRPF18
ENSG00000186960	13.1263	-4.19437	0.727636	-5.76437	8.2e-09	3.66e-08	LINC01551		ENSG00000135587	522.286	0.627423	0.0950549	6.60064	4.09e-11	2.16e-10	SMPD2
ENSG00000238078	6.43357	-4.19409	1.17129	-3.58074	0.000342621	0.000988664	LINC01352		ENSG00000269825	84.338	0.627824	0.179218	3.50313	0.000459825	0.00130481	AC022150.4
ENSG00000232006	14.5607	-4.19335	0.681416	-6.15387	7.56e-10	3.63e-09	AC005537.1		ENSG00000271933	68.1994	0.627984	0.203488	3.0861	0.00202802	0.00526562	AL603756.1
ENSG00000170500	439.489	-4.18974	0.123286	-33.9839	3.85e-253	2.16e-250	LONRF2		ENSG00000196132	169.872	0.628104	0.129765	4.84031	1.3e-06	4.83e-06	MYT1
ENSG00000249421	2.65242	-4.18343	1.47495	-2.83632	0.0045637	0.0112733	ADAMTS19-AS1		ENSG00000260916	740.887	0.628133	0.0750889	8.36519	6e-17	4.41e-16	CCPG1
ENSG00000177873	103.085	-4.1834	0.255007	-16.405	1.76e-60	5.43e-59	ZNF619		ENSG00000179743	244.296	0.628409	0.133501	4.70714	2.51e-06	9.12e-06	AL450998.2
ENSG00000241532	2.17404	-4.18323	1.57018	-2.66418	0.00771763	0.0183043	AGGF1P3		ENSG00000092439	2800.24	0.628426	0.0443873	14.1578	1.67e-45	3.51e-44	TRPM7
ENSG00000066382	28.6595	-4.18264	0.454114	-9.21055	3.24e-20	2.77e-19	MPPED2		ENSG00000234500	35.8892	0.628609	0.273525	2.29818	0.0215518	0.04648	AC008267.3
ENSG00000226668	4.26268	-4.17604	1.25041	-3.33974	0.000838565	0.0022984	AL136981.1		ENSG00000170473	1497.48	0.628786	0.056786	11.0729	1.7e-28	2.09e-27	PYM1
ENSG00000080166	15.7913	-4.17271	0.635044	-6.57074	5.01e-11	2.62e-10	DCT		ENSG00000125967	1656.88	0.628817	0.0709879	8.85809	8.14e-19	6.54e-18	NECAB3
ENSG00000145451	1.8514	-4.17161	1.53883	-2.71089	0.00671021	0.0160885	GLRA3		ENSG00000164307	691.706	0.628877	0.0859593	7.31598	2.56e-13	1.54e-12	ERAP1
ENSG00000103647	13.9342	-4.17056	0.712886	-5.85025	4.91e-09	2.23e-08	CORO2B		ENSG00000132003	186.261	0.628979	0.136663	4.60242	4.18e-06	1.49e-05	ZSWIM4
ENSG00000231808	4.68236	-4.16631	1.20745	-3.45051	0.000559534	0.00156753	LINC01388		ENSG00000197774	810.052	0.629005	0.0809678	7.76858	7.94e-15	5.22e-14	EME2
ENSG00000259240	4.61096	-4.16626	1.2192	-3.4172	0.00063268	0.00176203	MIR4713HG		ENSG00000178026	718.977	0.629117	0.0817776	7.69302	1.44e-14	9.28e-14	LRRC75B
ENSG00000131435	37.7076	-4.1654	0.412499	-10.098	5.64e-24	5.74e-23	PDLIM4		ENSG00000180776	4562.16	0.629668	0.0370135	17.0118	6.71e-65	2.33e-63	ZDHHC20
ENSG00000204252	12.3266	-4.15451	0.712596	-5.83011	5.54e-09	2.51e-08	HLA-DOA		ENSG00000158315	55.9937	0.630058	0.247383	2.54689	0.0108687	0.0250496	RHBDL2
ENSG00000175287	301.356	-4.15267	0.157337	-26.3935	1.63e-153	2.71e-151	PHYHD1		ENSG00000115657	122.183	0.63011	0.156072	4.0373	5.41e-05	0.000171981	ABCB6
ENSG00000139793	192.349	-4.14925	0.179549	-23.1093	3.73e-118	3.59e-116	MBNL2		ENSG00000064687	1177.49	0.630455	0.0680764	9.26099	2.03e-20	1.75e-19	ABCA7
ENSG00000156466	16.2719	-4.14781	0.621206	-6.67702	2.44e-11	1.31e-10	GDF6		ENSG00000135111	8840.59	0.630607	0.0514969	12.2455	1.78e-34	2.67e-33	TBX3
ENSG00000261247	4.44521	-4.14713	1.22092	-3.39672	0.000681985	0.00189263	GOLGA8T		ENSG00000171811	54.6503	0.630724	0.241172	2.61525	0.00891619	0.0208804	CFAP46
ENSG00000275506	1.45188	-4.14063	1.59305	-2.59919	0.00934443	0.0217923	AC010378.1		ENSG00000005884	539.88	0.63089	0.0922554	6.83852	8e-12	4.43e-11	ITGA3
ENSG00000258745	1.64227	-4.13281	1.75741	-2.35166	0.0186901	0.0408531	AL358334.3		ENSG00000256806	170.453	0.631237	0.153878	4.10219	4.09e-05	0.000132053	C17orf100
ENSG00000122691	62.1778	-4.13162	0.309934	-13.3306	1.54e-40	2.81e-39	TWIST1		ENSG00000139910	516.936	0.631845	0.086866	7.27379	3.5e-13	2.09e-12	NOVA1
ENSG00000278875	5.68255	-4.12793	1.0266	-4.02096	5.8e-05	0.000183618	AC025809.2		ENSG00000242485	3615.16	0.632144	0.0671995	9.40696	5.11e-21	4.53e-20	MRPL20
ENSG00000116106	162.557	-4.12086	0.201503	-20.4507	5.93e-93	3.69e-91	EPHA4		ENSG00000152217	438.284	0.632271	0.0943957	6.6981	2.11e-11	1.13e-10	SETBP1
ENSG00000101958	2.64328	-4.11881	1.53116	-2.68998	0.00714555	0.0170445	GLRA2		ENSG00000272476	58.1403	0.632442	0.21946	2.88181	0.00395401	0.0098567	AL024507.2
ENSG00000129455	2.53246	-4.11326	1.49639	-2.74879	0.00598159	0.0144652	KLK8		ENSG00000186166	607.981	0.63276	0.0816037	7.75405	8.9e-15	5.83e-14	CCDC84
ENSG00000146243	107.159	-4.10365	0.246653	-16.6373	3.74e-62	1.21e-60	IRAK1BP1		ENSG00000183666	466.513	0.632831	0.083843	7.5478	4.43e-14	2.79e-13	GUSBP1
ENSG00000266524	2.01015	-4.10199	1.52479	-2.6902	0.00714089	0.0170349	GDF10		ENSG00000130779	4237.53	0.632903	0.0357808	17.6883	5.16e-70	1.99e-68	CLIP1
ENSG00000187955	940.602	-4.10184	0.0854649	-47.9945	0	0	COL14A1		ENSG00000198417	178.657	0.633292	0.132435	4.7819	1.74e-06	6.39e-06	MT1F
ENSG00000254349	5.83294	-4.10164	1.03635	-3.95778	7.56e-05	0.000236461	MIR2052HG		ENSG00000179523	439.461	0.633396	0.108588	5.83301	5.44e-09	2.46e-08	EIF3J-DT
ENSG00000147606	13.3589	-4.10113	0.714949	-5.73625	9.68e-09	4.29e-08	SLC26A7		ENSG00000054179	419.53	0.633608	0.106876	5.92846	3.06e-09	1.41e-08	ENTPD2
ENSG00000095777	41.1307	-4.09691	0.390381	-10.4946	9.14e-26	1.01e-24	MYO3A		ENSG00000189043	5740.56	0.633646	0.0758457	8.35441	6.58e-17	4.82e-16	NDUFA4
ENSG00000186197	25.2677	-4.09263	0.502006	-8.15256	3.56e-16	2.5e-15	EDARADD		ENSG00000108984	464.862	0.633711	0.0880122	7.20027	6.01e-13	3.56e-12	MAP2K6
ENSG00000079739	484.007	-4.0924	0.119138	-34.3502	1.4e-258	8.35e-256	PGM1		ENSG00000172366	3051.56	0.633734	0.0465615	13.6107	3.46e-42	6.64e-41	MCRIP2
ENSG00000214960	19.3711	-4.0919	0.538043	-7.60515	2.85e-14	1.81e-13	CRPPA		ENSG00000163346	671.857	0.634061	0.0757023	8.37571	5.49e-17	4.04e-16	PBXIP1
ENSG00000198597	78.3882	-4.09087	0.276867	-14.7756	2.11e-49	4.99e-48	ZNF536		ENSG00000179918	6365.11	0.634466	0.0487565	13.013	1.03e-38	1.79e-37	SEPHS2
ENSG00000125931	87.0295	-4.08919	0.278227	-14.6973	6.71e-49	1.57e-47	CITED1		ENSG00000127922	2991.85	0.634543	0.141212	4.49355	7e-06	2.44e-05	SEM1
ENSG00000249069	32.2991	-4.08258	0.43832	-9.31416	1.23e-20	1.07e-19	LINC01033		ENSG00000187531	976.385	0.634628	0.0640856	9.90281	4.05e-23	3.98e-22	SIRT7
ENSG00000123700	3.34165	-4.08215	1.26599	-3.22448	0.00126202	0.00338019	KCNJ2		ENSG00000104611	807.109	0.635591	0.0632045	10.0561	8.64e-24	8.74e-23	SH2D4A
ENSG00000271584	1.81428	-4.08063	1.73499	-2.35196	0.0186748	0.0408295	LINC02550		ENSG00000183049	976.515	0.635743	0.0732759	8.67602	4.1e-18	3.19e-17	CAMK1D
ENSG00000168356	9.69249	-4.07976	0.788661	-5.17303	2.3e-07	9.2e-07	SCN11A		ENSG00000145016	988.231	0.63575	0.0755291	8.41728	3.85e-17	2.86e-16	RUBCN
ENSG00000137573	231.094	-4.07278	0.157202	-25.9079	5.42e-148	8.32e-146	SULF1		ENSG00000064651	1574.32	0.635845	0.0496438	12.8081	1.48e-37	2.47e-36	SLC12A2
ENSG00000178403	9.65478	-4.0696	0.802511	-5.07108	3.96e-07	1.55e-06	NEUROG2		ENSG00000260081	58.9912	0.636023	0.265731	2.39349	0.0166891	0.0369494	AF274858.1
ENSG00000178695	226.579	-4.06754	0.19549	-20.8069	3.75e-96	2.47e-94	KCTD12		ENSG00000183648	1572.86	0.636242	0.138786	4.58435	4.55e-06	1.61e-05	NDUFB1
ENSG00000064655	121.892	-4.06575	0.232253	-17.5057	1.3e-68	4.86e-67	EYA2		ENSG00000135535	8570.29	0.636403	0.0412878	15.4139	1.32e-53	3.51e-52	CD164
ENSG00000139629	93.6236	-4.05912	0.246584	-16.4614	6.95e-61	2.17e-59	GALNT6		ENSG00000198168	1499.01	0.636455	0.0771653	8.24794	1.61e-16	1.16e-15	SVIP
ENSG00000102313	7.10194	-4.05153	0.988652	-4.09803	4.17e-05	0.000134336	ITIH6		ENSG00000279253	43.8275	0.636684	0.252902	2.51751	0.0118188	0.0270397	AL121753.2
ENSG00000101134	2.61536	-4.05104	1.565	-2.58852	0.00963895	0.0224278	DOK5		ENSG00000173163	490.392	0.636704	0.0946122	6.72962	1.7e-11	9.19e-11	COMMD1
ENSG00000173068	36.4513	-4.04932	0.406144	-9.97017	2.06e-23	2.05e-22	BNC2		ENSG00000169242	2230.8	0.636767	0.0781028	8.15294	3.55e-16	2.5e-15	EFNA1
ENSG00000135298	7.01207	-4.04918	0.888806	-4.55576	5.22e-06	1.84e-05	ADGRB3		ENSG00000173264	1774.54	0.637493	0.0753571	8.45963	2.68e-17	2.01e-16	GPR137
ENSG00000145808	19.3249	-4.0474	0.546009	-7.41271	1.24e-13	7.61e-13	ADAMTS19		ENSG00000052344	1078.4	0.63793	0.0866685	7.36058	1.83e-13	1.11e-12	PRSS8
ENSG00000233611	1.83862	-4.04691	1.75426	-2.30691	0.02106	0.0455229	AC019068.1		ENSG00000140332	4998.46	0.638478	0.0575454	11.0952	1.32e-28	1.63e-27	TLE3
ENSG00000138131	54.1856	-4.04622	0.359097	-11.2678	1.89e-29	2.4e-28	LOXL4		ENSG00000185043	4048.76	0.638561	0.0597485	10.6875	1.17e-26	1.34e-25	CIB1
ENSG00000170370	33.7077	-4.04479	0.413146	-9.79021	1.24e-22	1.19e-21	EMX2		ENSG00000235453	47.0297	0.638869	0.259349	2.46336	0.0137642	0.0310692	SMIM27
ENSG00000164904	644.267	-4.04412	0.0967094	-41.8172	0	0	ALDH7A1		ENSG00000172478	2476.68	0.639224	0.0829901	7.7024	1.34e-14	8.65e-14	MAB21L4
ENSG00000279464	4.54269	-4.04015	1.38383	-2.91955	0.00350536	0.00879813	AC096720.2		ENSG00000231925	2224.93	0.639358	0.0653878	9.77794	1.4e-22	1.34e-21	TAPBP
ENSG00000135917	9.98362	-4.03727	0.722231	-5.59	2.27e-08	9.81e-08	SLC19A3		ENSG00000175348	1617.01	0.63941	0.0635381	10.0634	8.02e-24	8.14e-23	TMEM9B
ENSG00000142538	2.16473	-4.03693	1.52067	-2.65471	0.00793778	0.0187779	PTH2		ENSG00000070081	10067.1	0.639453	0.0488999	13.0768	4.47e-39	7.81e-38	NUCB2
ENSG00000184271	60.7387	-4.0365	0.301344	-13.395	6.47e-41	1.2e-39	POU6F1		ENSG00000147050	5916.55	0.639535	0.0423227	15.1109	1.37e-51	3.47e-50	KDM6A
ENSG00000144891	5.98096	-4.03607	0.926029	-4.35848	1.31e-05	4.43e-05	AGTR1		ENSG00000125637	1259.8	0.639668	0.0834656	7.66385	1.8e-14	1.16e-13	PSD4
ENSG00000272905	2.54548	-4.03573	1.49429	-2.70076	0.00691805	0.0165449	AC018648.1		ENSG00000099326	1154.11	0.639778	0.0604234	10.5882	3.38e-26	3.79e-25	MZF1
ENSG00000256164	2.40562	-4.03428	1.48857	-2.71016	0.00672498	0.0161155	#N/A		ENSG00000274712	156.998	0.639887	0.150669	4.24696	2.17e-05	7.17e-05	AC005332.4
ENSG00000107443	268.518	-4.03415	0.154882	-26.0465	1.47e-149	2.31e-147	CCNJ		ENSG00000150756	670.368	0.640125	0.0919463	6.96194	3.36e-12	1.9e-11	ATPSCKMT
ENSG00000119715	15.6778	-4.03382	0.681197	-5.92167	3.19e-09	1.47e-08	ESRRB		ENSG00000179403	2106.31	0.641018	0.0711622	9.00784	2.1e-19	1.74e-18	VWA1
ENSG00000228444	1.94197	-4.03355	1.55536	-2.59333	0.00950521	0.0221353	AL137244.1		ENSG00000226124	298.96	0.641068	0.105976	6.0492	1.46e-09	6.85e-09	FTCDNL1
ENSG00000268379	2.22656	-4.03355	1.56146	-2.58318	0.00978929	0.0227449	AC025588.1		ENSG00000170412	1383.55	0.641074	0.0595058	10.7733	4.6e-27	5.35e-26	GPRC5C
ENSG00000110195	3.172	-4.03053	1.37919	-2.9224	0.00347346	0.00872283	FOLR1		ENSG00000008853	529.192	0.6418	0.0872822	7.35316	1.94e-13	1.17e-12	RHOBTB2
ENSG00000188004	2.02492	-4.02852	1.53611	-2.62255	0.0087275	0.0204751	SNHG28		ENSG00000117676	1977.16	0.642147	0.051152	12.5537	3.79e-36	6.03e-35	RPS6KA1
ENSG00000273450	1.22547	-4.00569	1.76186	-2.27356	0.0229924	0.0492802	AL139124.1		ENSG00000279041	44.2904	0.64216	0.22903	2.80382	0.00505013	0.0123792	AC102945.2
ENSG00000260838	5.28646	-4.0005	1.05967	-3.77525	0.000159846	0.000479888	AC022893.2		ENSG00000145632	111.676	0.64231	0.165128	3.88977	0.000100339	0.000309239	PLK2
ENSG00000253161	108.354	-3.99976	0.248149	-16.1184	1.9e-58	5.57e-57	LINC01605		ENSG00000214194	2448.33	0.643131	0.083024	7.74634	9.46e-15	6.19e-14	SMIM30
ENSG00000108231	6.74386	-3.9986	0.952292	-4.19892	2.68e-05	8.79e-05	LGI1		ENSG00000184307	866.872	0.643896	0.0640692	10.05	9.19e-24	9.28e-23	ZDHHC23
ENSG00000131969	18.6965	-3.9911	0.55666	-7.16972	7.52e-13	4.42e-12	ABHD12B		ENSG00000213699	1544.5	0.644023	0.0683313	9.425	4.3e-21	3.84e-20	SLC35F6
ENSG00000106066	256.694	-3.98679	0.168082	-23.7193	2.28e-124	2.41e-122	CPVL		ENSG00000184702	1348.87	0.644318	0.0685199	9.40337	5.28e-21	4.69e-20	SEPTIN5
ENSG00000121361	86.9055	-3.9854	0.256035	-15.5658	1.24e-54	3.38e-53	KCNJ8		ENSG00000183793	124.398	0.644345	0.161118	3.99921	6.36e-05	0.000200316	NPIPA5
ENSG00000111249	53.086	-3.97958	0.343698	-11.5787	5.28e-31	7.1e-30	CUX2		ENSG00000271664	47.5225	0.645104	0.237635	2.71468	0.00663396	0.0159181	AC004890.3
ENSG00000277400	3.15763	-3.97294	1.27725	-3.11055	0.00186741	0.00487207	AC145212.1		ENSG00000162522	10118.6	0.645423	0.073647	8.76374	1.89e-18	1.49e-17	KIAA1522
ENSG00000120057	7.34138	-3.96717	0.902038	-4.398	1.09e-05	3.72e-05	SFRP5		ENSG00000272849	67.1572	0.645464	0.261636	2.46703	0.0136239	0.0307701	AC084018.1
ENSG00000261787	40.635	-3.96585	0.380434	-10.4245	1.92e-25	2.08e-24	TCF24		ENSG00000141294	81.8262	0.645619	0.20024	3.22423	0.00126311	0.00338245	LRRC46
ENSG00000100234	165.907	-3.96325	0.180537	-21.9526	8.18e-107	6.48e-105	TIMP3		ENSG00000272150	78.3986	0.645748	0.227526	2.83813	0.00453787	0.0112145	NBPF25P
ENSG00000123119	43.7056	-3.95984	0.372224	-10.6383	1.98e-26	2.24e-25	NECAB1		ENSG00000237188	41.4936	0.645978	0.256264	2.52075	0.0117105	0.0268253	AC242426.2
ENSG00000116132	36.3421	-3.95874	0.393647	-10.0566	8.59e-24	8.71e-23	PRRX1		ENSG00000121900	1940.5	0.646126	0.0522316	12.3704	3.78e-35	5.86e-34	TMEM54
ENSG00000146910	118.104	-3.95685	0.214777	-18.4231	8.58e-76	3.78e-74	CNPY1		ENSG00000142235	406.297	0.646222	0.0958527	6.74183	1.56e-11	8.47e-11	LMTK3
ENSG00000206187	1.77592	-3.9561	1.61935	-2.44302	0.0145649	0.0327128	LINC02346		ENSG00000278600	260.854	0.646287	0.117037	5.52206	3.35e-08	1.43e-07	AC015871.4
ENSG00000121743	81.2365	-3.95529	0.254718	-15.5281	2.24e-54	6.04e-53	GJA3		ENSG00000197324	3706.81	0.646291	0.0690978	9.35327	8.5e-21	7.45e-20	LRP10
ENSG00000269954	1.73158	-3.954	1.63845	-2.41325	0.0158108	0.0352061	AC022239.1		ENSG00000163959	298.086	0.646589	0.0962537	6.71756	1.85e-11	9.97e-11	SLC51A
ENSG00000278492	1.50073	-3.95317	1.61513	-2.44758	0.0143821	0.032339	AC006213.5		ENSG00000169019	608.426	0.647054	0.0932944	6.93562	4.04e-12	2.28e-11	COMMD8
ENSG00000254561	2.21769	-3.95071	1.64992	-2.39448	0.0166438	0.0368639	AP003393.1		ENSG00000273061	57.2272	0.647195	0.249576	2.59318	0.00950921	0.0221428	CDC37L1-DT
ENSG00000232650	1.89401	-3.94737	1.58294	-2.4937	0.0126419	0.0287863	LINC01780		ENSG00000172594	240.075	0.647257	0.123019	5.26142	1.43e-07	5.8e-07	SMPDL3A
ENSG00000259404	3.70682	-3.946	1.29332	-3.05107	0.00228029	0.00587347	EFL1P1		ENSG00000251003	125.783	0.647298	0.180078	3.59453	0.000324975	0.000940484	ZFPM2-AS1
ENSG00000143921	3.54485	-3.94509	1.29712	-3.04143	0.0023546	0.00605182	ABCG8		ENSG00000162585	2211.18	0.64756	0.0488225	13.2635	3.77e-40	6.8e-39	FAAP20
ENSG00000236668	9.68062	-3.93915	0.827748	-4.75888	1.95e-06	7.13e-06	AC006450.3		ENSG00000166477	2046.67	0.64764	0.0483752	13.3879	7.12e-41	1.32e-39	LEO1
ENSG00000150893	63.3833	-3.93397	0.317048	-12.4081	2.36e-35	3.67e-34	FREM2		ENSG00000122644	542.073	0.647667	0.103541	6.25515	3.97e-10	1.95e-09	ARL4A
ENSG00000177103	1.51157	-3.93268	1.63618	-2.40357	0.016236	0.0360507	DSCAML1		ENSG00000183048	964.107	0.647876	0.0895268	7.23667	4.6e-13	2.73e-12	SLC25A10
ENSG00000180938	60.2558	-3.92909	0.310966	-12.6351	1.35e-36	2.17e-35	ZNF572		ENSG00000166689	914.323	0.647953	0.0638871	10.1422	3.59e-24	3.68e-23	PLEKHA7
ENSG00000164853	4.1576	-3.92569	1.12757	-3.48156	0.000498499	0.00140729	UNCX		ENSG00000090266	3834.03	0.648337	0.0800366	8.10051	5.47e-16	3.82e-15	NDUFB2
ENSG00000233639	31.8859	-3.92496	0.397264	-9.87997	5.08e-23	4.99e-22	PANTR1		ENSG00000103150	660.919	0.64838	0.076118	8.51809	1.62e-17	1.23e-16	MLYCD
ENSG00000148600	88.2239	-3.92204	0.260341	-15.065	2.75e-51	6.86e-50	CDHR1		ENSG00000137628	80.1881	0.648424	0.195969	3.3088	0.000936957	0.00255383	DDX60
ENSG00000152672	11.1679	-3.92116	0.695261	-5.63984	1.7e-08	7.41e-08	CLEC4F		ENSG00000233822	385.985	0.648497	0.0977942	6.63124	3.33e-11	1.76e-10	HIST1H2BN
ENSG00000135272	168.909	-3.92015	0.186597	-21.0087	5.46e-98	3.68e-96	MDFIC		ENSG00000100439	1905.82	0.648971	0.0610678	10.6271	2.23e-26	2.53e-25	ABHD4
ENSG00000239445	3.34348	-3.91761	1.30878	-2.99334	0.00275947	0.00702672	ST3GAL6-AS1		ENSG00000147813	1350.05	0.649056	0.0584055	11.1129	1.09e-28	1.34e-27	NAPRT
ENSG00000267313	24.939	-3.9148	0.454947	-8.60496	7.63e-18	5.86e-17	AC021504.1		ENSG00000257337	745.759	0.649185	0.0755944	8.58773	8.87e-18	6.79e-17	AC068888.1
ENSG00000164411	41.7066	-3.91324	0.36663	-10.6735	1.35e-26	1.55e-25	GJB7		ENSG00000126709	325.288	0.649939	0.120525	5.39255	6.95e-08	2.89e-07	IFI6
ENSG00000125384	14.5345	-3.91289	0.641813	-6.09662	1.08e-09	5.15e-09	PTGER2		ENSG00000073803	1529.22	0.649953	0.0523256	12.4213	2e-35	3.12e-34	MAP3K13
ENSG00000119919	8.25868	-3.9123	0.793569	-4.93001	8.22e-07	3.12e-06	NKX2-3		ENSG00000167608	1555.34	0.649979	0.0796231	8.1632	3.26e-16	2.3e-15	TMC4
ENSG00000183346	7.42132	-3.90878	0.881075	-4.43638	9.15e-06	3.14e-05	CABCOCO1		ENSG00000275437	189.126	0.650181	0.12002	5.41727	6.05e-08	2.53e-07	AL121832.3
ENSG00000177459	23.857	-3.90652	0.558807	-6.99082	2.73e-12	1.55e-11	ERICH5		ENSG00000175193	1500.6	0.650281	0.0670036	9.70517	2.87e-22	2.7e-21	PARL
ENSG00000112837	312.44	-3.90505	0.130672	-29.8843	3.15e-196	9.02e-194	TBX18		ENSG00000173153	4968.88	0.650309	0.0458013	14.1985	9.36e-46	1.98e-44	ESRRA
ENSG00000116035	46.1137	-3.90474	0.350157	-11.1514	7.05e-29	8.81e-28	VAX2		ENSG00000188869	68.1341	0.650575	0.232898	2.79338	0.00521599	0.0127528	TMC3
ENSG00000154655	19.3246	-3.90459	0.543264	-7.18728	6.61e-13	3.9e-12	L3MBTL4		ENSG00000154065	901.219	0.650622	0.0697252	9.33124	1.05e-20	9.14e-20	ANKRD29
ENSG00000250366	14.2108	-3.89947	0.637304	-6.1187	9.43e-10	4.5e-09	TUNAR		ENSG00000089820	298.981	0.651055	0.0986307	6.60094	4.09e-11	2.15e-10	ARHGAP4
ENSG00000270020	9.49255	-3.89385	0.780918	-4.98625	6.16e-07	2.37e-06	AC009108.3		ENSG00000141556	3640.32	0.651273	0.046179	14.1032	3.63e-45	7.53e-44	TBCD
ENSG00000172572	5.00509	-3.89383	1.0479	-3.71584	0.000202531	0.000599848	PDE3A		ENSG00000239213	127.001	0.651313	0.167821	3.881	0.000104028	0.000319964	NCK1-DT
ENSG00000139292	32.1662	-3.89119	0.406653	-9.56883	1.08e-21	9.92e-21	LGR5		ENSG00000260231	437.832	0.651848	0.100011	6.51777	7.14e-11	3.7e-10	KDM7A-DT
ENSG00000229847	78.7762	-3.88981	0.273357	-14.2298	5.98e-46	1.28e-44	EMX2OS		ENSG00000072201	229.51	0.652173	0.110373	5.90883	3.45e-09	1.58e-08	LNX1
ENSG00000138685	176.576	-3.88826	0.178276	-21.8104	1.85e-105	1.44e-103	FGF2		ENSG00000196812	176.65	0.652636	0.141155	4.62355	3.77e-06	1.35e-05	ZSCAN16
ENSG00000159921	300.725	-3.88799	0.138232	-28.1266	4.64e-174	9.73e-172	GNE		ENSG00000230163	76.7273	0.653011	0.22095	2.95546	0.00312198	0.00788991	AL122010.1
ENSG00000127507	4.98555	-3.88764	1.09453	-3.55188	0.000382487	0.00109657	ADGRE2		ENSG00000205791	112.581	0.653207	0.170121	3.83967	0.000123201	0.000375865	LOH12CR2
ENSG00000196748	4.9073	-3.88707	1.05843	-3.67247	0.000240216	0.000705608	CLPSL2		ENSG00000119673	2133.97	0.65348	0.0444157	14.7128	5.33e-49	1.25e-47	ACOT2
ENSG00000168671	25.218	-3.88596	0.472656	-8.22155	2.01e-16	1.44e-15	UGT3A2		ENSG00000158571	35.7582	0.653617	0.272195	2.40128	0.0163376	0.0362471	PFKFB1
ENSG00000158458	34.0211	-3.88351	0.405773	-9.57064	1.06e-21	9.75e-21	NRG2		ENSG00000124145	2151.55	0.653732	0.0532017	12.2878	1.05e-34	1.6e-33	SDC4
ENSG00000269707	8.25147	-3.87976	0.779983	-4.97415	6.55e-07	2.51e-06	AC018730.1		ENSG00000101844	694.317	0.653971	0.0791931	8.25792	1.48e-16	1.07e-15	ATG4A
ENSG00000230910	1.82784	-3.87529	1.63749	-2.3666	0.0179522	0.0394219	AL391807.1		ENSG00000279759	225.997	0.654457	0.132805	4.92794	8.31e-07	3.15e-06	AC118344.2
ENSG00000122824	79.0855	-3.87396	0.252598	-15.3365	4.36e-53	1.15e-51	NUDT10		ENSG00000167105	84.101	0.654477	0.268236	2.43993	0.0146901	0.0329615	TMEM92
ENSG00000125816	56.6091	-3.87348	0.33746	-11.4783	1.7e-30	2.24e-29	NKX2-4		ENSG00000141741	1336.54	0.654577	0.0637143	10.2736	9.27e-25	9.75e-24	MIEN1
ENSG00000135903	153.788	-3.87213	0.184159	-21.026	3.79e-98	2.56e-96	PAX3		ENSG00000186193	2297.2	0.654911	0.0583112	11.2313	2.86e-29	3.62e-28	SAPCD2
ENSG00000188383	13.0214	-3.87077	0.670334	-5.7744	7.72e-09	3.45e-08	GPAT2P2		ENSG00000072778	13830.5	0.654998	0.0344644	19.0051	1.55e-80	7.51e-79	ACADVL
ENSG00000125285	39.1983	-3.8699	0.38466	-10.0606	8.25e-24	8.37e-23	SOX21		ENSG00000105357	2768.08	0.655012	0.070065	9.34864	8.88e-21	7.78e-20	MYH14
ENSG00000185477	82.1421	-3.8699	0.259823	-14.8944	3.59e-50	8.67e-49	GPRIN3		ENSG00000198373	1758.32	0.655357	0.0629978	10.4028	2.41e-25	2.59e-24	WWP2
ENSG00000232046	2.38132	-3.86952	1.52801	-2.53239	0.0113287	0.0260224	LINC01798		ENSG00000067113	3799.85	0.655388	0.0625817	10.4725	1.16e-25	1.27e-24	PLPP1
ENSG00000250645	10.3329	-3.86753	0.767334	-5.04022	4.65e-07	1.81e-06	AC010442.3		ENSG00000112144	2178.32	0.65558	0.0534726	12.2601	1.48e-34	2.24e-33	ICK
ENSG00000257718	2.83012	-3.86696	1.31068	-2.95035	0.00317413	0.00801139	CPNE8-AS1		ENSG00000099875	9524.2	0.655967	0.0585354	11.2063	3.8e-29	4.78e-28	MKNK2
ENSG00000240668	1.44417	-3.86602	1.68851	-2.2896	0.0220446	0.0474423	KRT8P36		ENSG00000156711	1310.46	0.655971	0.0547572	11.9796	4.54e-33	6.57e-32	MAPK13
ENSG00000078549	82.1513	-3.86473	0.265311	-14.5668	4.57e-48	1.04e-46	ADCYAP1R1		ENSG00000163520	389.442	0.656071	0.131704	4.98141	6.31e-07	2.43e-06	FBLN2
ENSG00000177409	1.97434	-3.86253	1.48374	-2.60323	0.00923487	0.0215624	SAMD9L		ENSG00000165194	160.803	0.656176	0.145141	4.52095	6.16e-06	2.15e-05	PCDH19
ENSG00000204136	5.99638	-3.8625	0.908334	-4.25229	2.12e-05	7.01e-05	GGTA1P		ENSG00000170296	115.778	0.656681	0.25433	2.582	0.00982294	0.0228096	GABARAP
ENSG00000185436	69.1632	-3.86202	0.279781	-13.8037	2.42e-43	4.75e-42	IFNLR1		ENSG00000104823	5573.9	0.657045	0.0638203	10.2952	7.4e-25	7.83e-24	ECH1
ENSG00000121005	175.326	-3.85885	0.177032	-21.7975	2.45e-105	1.9e-103	CRISPLD1		ENSG00000140157	2234.87	0.657418	0.0486747	13.5063	1.43e-41	2.72e-40	NIPA2
ENSG00000227355	4.75389	-3.85394	1.27771	-3.01628	0.00255895	0.00654765	AL359644.1		ENSG00000061938	2805.85	0.657573	0.0689084	9.5427	1.39e-21	1.27e-20	TNK2
ENSG00000154277	916.671	-3.85199	0.0914767	-42.1089	0	0	UCHL1		ENSG00000162913	68.2351	0.657658	0.239325	2.74797	0.00599657	0.0144976	OBSCN-AS1
ENSG00000188176	13.9719	-3.85092	0.662281	-5.81464	6.08e-09	2.74e-08	SMTNL2		ENSG00000044115	12674.3	0.657949	0.0457498	14.3815	6.76e-47	1.49e-45	CTNNA1
ENSG00000249894	2.08274	-3.85081	1.62142	-2.37496	0.0175511	0.0386553	AC024581.1		ENSG00000117407	94.2416	0.658007	0.215691	3.05069	0.00228317	0.00587979	ARTN
ENSG00000236609	145.539	-3.85015	0.190021	-20.2617	2.8e-91	1.7e-89	ZNF853		ENSG00000114378	269.63	0.658408	0.121975	5.39791	6.74e-08	2.81e-07	HYAL1
ENSG00000128573	178.29	-3.8456	0.17926	-21.4527	4.31e-102	3.18e-100	FOXP2		ENSG00000178821	684.023	0.658414	0.0992884	6.63132	3.33e-11	1.76e-10	TMEM52
ENSG00000185352	41.1487	-3.8388	0.346829	-11.0683	1.79e-28	2.2e-27	HS6ST3		ENSG00000170835	77.3303	0.658575	0.194512	3.38578	0.000709756	0.00196415	CEL
ENSG00000168765	38.0681	-3.83711	0.386733	-9.92186	3.34e-23	3.31e-22	GSTM4		ENSG00000251615	74.8826	0.658598	0.213455	3.08542	0.00203266	0.00527575	AC104825.1
ENSG00000151136	88.6892	-3.83689	0.246513	-15.5646	1.27e-54	3.44e-53	BTBD11		ENSG00000166925	3554.94	0.658625	0.0533218	12.3519	4.76e-35	7.34e-34	TSC22D4
ENSG00000176692	11.7399	-3.83669	0.715847	-5.35966	8.34e-08	3.44e-07	FOXC2		ENSG00000128581	1714.31	0.658638	0.0536441	12.2779	1.19e-34	1.8e-33	IFT22
ENSG00000171714	150.142	-3.83441	0.192239	-19.946	1.62e-88	9.29e-87	ANO5		ENSG00000205560	42.1647	0.65875	0.260908	2.52484	0.0115751	0.0265398	CPT1B
ENSG00000082684	5.71125	-3.8296	1.03802	-3.68933	0.000224842	0.000662358	SEMA5B		ENSG00000261556	189.999	0.659019	0.131444	5.0137	5.34e-07	2.07e-06	SMG1P7
ENSG00000269190	302.769	-3.82706	0.138507	-27.6307	4.76e-168	9.21e-166	FBXO17		ENSG00000188157	5358.77	0.65921	0.070108	9.40277	5.31e-21	4.71e-20	AGRN
ENSG00000116704	320.38	-3.82662	0.131746	-29.0454	1.76e-185	4.32e-183	SLC35D1		ENSG00000156958	1108.94	0.659263	0.0870111	7.57677	3.54e-14	2.24e-13	GALK2
ENSG00000135457	314.078	-3.82133	0.13408	-28.5004	1.16e-178	2.65e-176	TFCP2		ENSG00000080947	152.493	0.659318	0.135945	4.8499	1.24e-06	4.62e-06	CROCCP3
ENSG00000170558	317.954	-3.8204	0.137023	-27.8816	4.46e-171	9.09e-169	CDH2		ENSG00000150712	2350.74	0.659351	0.0537896	12.258	1.52e-34	2.3e-33	MTMR12
ENSG00000100505	130.693	-3.81529	0.230658	-16.5409	1.86e-61	5.89e-60	TRIM9		ENSG00000162426	116.728	0.659428	0.219441	3.00504	0.00265548	0.00677637	SLC45A1
ENSG00000183134	2.16619	-3.81386	1.55214	-2.45717	0.0140038	0.0315633	PTGDR2		ENSG00000146700	139.157	0.65952	0.174722	3.77468	0.000160212	0.000480882	SSC4D
ENSG00000172014	5.48817	-3.81376	0.906809	-4.20569	2.6e-05	8.55e-05	ANKRD20A4		ENSG00000160087	2427.14	0.659787	0.0398832	16.543	1.8e-61	5.7e-60	UBE2J2
ENSG00000269993	9.75148	-3.8117	0.770767	-4.94533	7.6e-07	2.9e-06	KC877982.1		ENSG00000179406	997.63	0.659966	0.0749057	8.81063	1.24e-18	9.93e-18	LINC00174
ENSG00000127990	149.257	-3.8072	0.198098	-19.2187	2.58e-82	1.31e-80	SGCE		ENSG00000005187	867.021	0.659998	0.0693094	9.52249	1.69e-21	1.54e-20	ACSM3
ENSG00000216866	947.356	-3.80717	0.328458	-11.591	4.58e-31	6.16e-30	RPS2P55		ENSG00000113504	3654.09	0.660125	0.0586849	11.2486	2.35e-29	2.98e-28	SLC12A7
ENSG00000170577	333.398	-3.8069	0.161403	-23.5863	5.33e-123	5.46e-121	SIX2		ENSG00000162817	1326.73	0.660312	0.0704201	9.37675	6.8e-21	6e-20	C1orf115
ENSG00000242265	12.2126	-3.80291	0.750334	-5.06829	4.01e-07	1.57e-06	PEG10		ENSG00000158373	682.375	0.660546	0.0851313	7.75915	8.55e-15	5.61e-14	HIST1H2BD
ENSG00000240694	165.833	-3.80289	0.175606	-21.6558	5.36e-104	4.05e-102	PNMA2		ENSG00000237940	34.8513	0.660864	0.28835	2.29188	0.0219124	0.0471836	LINC01238
ENSG00000175352	169.795	-3.79503	0.189861	-19.9885	6.94e-89	4e-87	NRIP3		ENSG00000005469	1015.66	0.661167	0.0755183	8.75506	2.04e-18	1.61e-17	CROT
ENSG00000185811	16.0863	-3.79443	0.613941	-6.18044	6.39e-10	3.08e-09	IKZF1		ENSG00000168404	180.6	0.661195	0.143211	4.61692	3.89e-06	1.39e-05	MLKL
ENSG00000138650	23.7021	-3.79409	0.475051	-7.9867	1.39e-15	9.47e-15	PCDH10		ENSG00000166734	3891.93	0.661904	0.04938	13.4043	5.71e-41	1.06e-39	CASC4
ENSG00000151490	4.32268	-3.79274	1.13376	-3.34528	0.000821989	0.00225612	PTPRO		ENSG00000157343	112.887	0.661929	0.218748	3.02599	0.0024782	0.00635227	ARMC12
ENSG00000235726	8.37656	-3.79014	0.70182	-5.40044	6.65e-08	2.77e-07	AC010148.1		ENSG00000091490	3635	0.661936	0.0468207	14.1377	2.22e-45	4.66e-44	SEL1L3
ENSG00000153976	156.662	-3.77992	0.183304	-20.6211	1.78e-94	1.13e-92	HS3ST3A1		ENSG00000080845	1868.7	0.662164	0.074659	8.86918	7.37e-19	5.93e-18	DLGAP4
ENSG00000125355	38.004	-3.77526	0.395793	-9.53848	1.45e-21	1.32e-20	TMEM255A		ENSG00000183735	1670.11	0.662242	0.0512986	12.9095	3.98e-38	6.75e-37	TBK1
ENSG00000259424	2.26062	-3.77195	1.51838	-2.48419	0.0129847	0.0294766	IRAIN		ENSG00000128849	696.899	0.662968	0.0873605	7.58888	3.23e-14	2.05e-13	CGNL1
ENSG00000167641	99.2059	-3.7692	0.230607	-16.3447	4.75e-60	1.45e-58	PPP1R14A		ENSG00000253669	55.8783	0.663047	0.248025	2.67331	0.00751071	0.0178505	GASAL1
ENSG00000072041	446.536	-3.76714	0.106294	-35.4409	4.01e-275	3.15e-272	SLC6A15		ENSG00000241468	4598.92	0.663116	0.0851562	7.78706	6.86e-15	4.52e-14	ATP5MF
ENSG00000185973	151.938	-3.76626	0.195242	-19.2902	6.49e-83	3.34e-81	TMLHE		ENSG00000274627	314.702	0.663136	0.109335	6.06518	1.32e-09	6.22e-09	#N/A
ENSG00000234424	6.17511	-3.76532	0.950279	-3.96234	7.42e-05	0.000232284	AL353743.4		ENSG00000181031	1126.73	0.663344	0.0591445	11.2156	3.42e-29	4.31e-28	RPH3AL
ENSG00000154548	124.676	-3.76369	0.224982	-16.7288	8.08e-63	2.65e-61	SRSF12		ENSG00000276728	101.033	0.663637	0.198628	3.3411	0.000834479	0.0022882	AC142472.1
ENSG00000205002	16.0321	-3.76253	0.552633	-6.80838	9.87e-12	5.43e-11	AARD		ENSG00000272721	50.4984	0.663681	0.240709	2.75719	0.00583011	0.0141262	AC131235.2
ENSG00000270182	2.35092	-3.76	1.44161	-2.60819	0.00910215	0.0212778	AC004080.4		ENSG00000107077	457.395	0.664113	0.0909862	7.29905	2.9e-13	1.74e-12	KDM4C
ENSG00000182568	117.841	-3.7537	0.202347	-18.5508	8.03e-77	3.61e-75	SATB1		ENSG00000267750	363.764	0.664209	0.0995681	6.67089	2.54e-11	1.36e-10	RUNDC3A-AS1
ENSG00000120162	71.2935	-3.75099	0.265752	-14.1146	3.09e-45	6.42e-44	MOB3B		ENSG00000250616	67.4945	0.66436	0.215007	3.08994	0.00200196	0.00520187	AC012645.1
ENSG00000277867	8.81469	-3.75092	0.759062	-4.94152	7.75e-07	2.95e-06	AC138649.4		ENSG00000161920	368.746	0.664437	0.0875759	7.58698	3.27e-14	2.08e-13	MED11
ENSG00000164112	3.81318	-3.74827	1.26391	-2.96563	0.00302065	0.00764859	TMEM155		ENSG00000099785	653.801	0.664485	0.0845977	7.85464	4.01e-15	2.68e-14	37316
ENSG00000165084	37.8972	-3.74728	0.404904	-9.25475	2.15e-20	1.85e-19	C8orf34		ENSG00000278356	76.5974	0.664532	0.181668	3.65796	0.000254235	0.00074464	AC005911.1
ENSG00000176788	134.314	-3.74492	0.206303	-18.1525	1.23e-73	5.16e-72	BASP1		ENSG00000272933	294.084	0.66487	0.125538	5.29618	1.18e-07	4.83e-07	AL391121.1
ENSG00000249242	32.9705	-3.74218	0.400165	-9.35161	8.63e-21	7.57e-20	TMEM150C		ENSG00000171813	1782.41	0.665012	0.0588513	11.2999	1.31e-29	1.68e-28	PWWP2B
ENSG00000137285	202.363	-3.74115	0.174721	-21.4121	1.03e-101	7.55e-100	TUBB2B		ENSG00000277232	74.0965	0.665032	0.206361	3.22266	0.00127006	0.00339974	GTSE1-DT
ENSG00000157404	62.577	-3.73908	0.278669	-13.4176	4.77e-41	8.9e-40	KIT		ENSG00000082438	1872.31	0.665069	0.0538073	12.3602	4.29e-35	6.63e-34	COBLL1
ENSG00000156925	204.331	-3.73892	0.182379	-20.5008	2.12e-93	1.33e-91	ZIC3		ENSG00000187164	2452.41	0.665252	0.0449761	14.7912	1.67e-49	3.97e-48	SHTN1
ENSG00000178150	23.5766	-3.73852	0.450657	-8.29569	1.08e-16	7.82e-16	ZNF114		ENSG00000149577	1750.18	0.66535	0.0675125	9.85522	6.51e-23	6.35e-22	SIDT2
ENSG00000112769	203.99	-3.73454	0.164176	-22.7471	1.53e-114	1.39e-112	LAMA4		ENSG00000149357	2377.86	0.665691	0.0558768	11.9135	1.01e-32	1.44e-31	LAMTOR1
ENSG00000227403	17.3026	-3.73121	0.553325	-6.74325	1.55e-11	8.39e-11	LINC01806		ENSG00000270872	86.7262	0.665726	0.17986	3.70136	0.000214444	0.000633493	SRGAP2D
ENSG00000182901	20.0713	-3.72992	0.503643	-7.40589	1.3e-13	8e-13	RGS7		ENSG00000244716	291.276	0.665783	0.282111	2.36001	0.0182746	0.0400436	BX679664.3
ENSG00000099256	183.306	-3.72927	0.194041	-19.219	2.57e-82	1.3e-80	PRTFDC1		ENSG00000149527	191.132	0.665877	0.154628	4.30631	1.66e-05	5.56e-05	PLCH2
ENSG00000226314	49.2198	-3.72766	0.340025	-10.9629	5.76e-28	6.94e-27	ZNF192P1		ENSG00000205710	163.025	0.666036	0.164413	4.05099	5.1e-05	0.000162752	C17orf107
ENSG00000155816	99.7314	-3.72716	0.220013	-16.9406	2.26e-64	7.76e-63	FMN2		ENSG00000139083	503.308	0.666731	0.0931416	7.15825	8.17e-13	4.79e-12	ETV6
ENSG00000262655	219.609	-3.72625	0.157796	-23.6144	2.74e-123	2.85e-121	SPON1		ENSG00000076944	1285.13	0.667303	0.0563026	11.8521	2.1e-32	2.97e-31	STXBP2
ENSG00000245651	3.33294	-3.72217	1.37359	-2.70981	0.00673225	0.0161301	AC083805.1		ENSG00000126500	188.583	0.667381	0.120856	5.52212	3.35e-08	1.43e-07	FLRT1
ENSG00000106031	124.75	-3.72133	0.228086	-16.3155	7.66e-60	2.33e-58	HOXA13		ENSG00000145743	2650.03	0.667402	0.0507827	13.1423	1.88e-39	3.32e-38	FBXL17
ENSG00000164318	22.78	-3.72016	0.597553	-6.22567	4.8e-10	2.34e-09	EGFLAM		ENSG00000064601	964.778	0.667544	0.0800407	8.34005	7.43e-17	5.42e-16	CTSA
ENSG00000146592	481.893	-3.71997	0.11019	-33.7595	7.75e-250	4.18e-247	CREB5		ENSG00000242474	58.9286	0.667655	0.205695	3.24584	0.00117103	0.00315122	AC093627.5
ENSG00000082497	214.788	-3.71819	0.164807	-22.5609	1.05e-112	9.07e-111	SERTAD4		ENSG00000170122	162.407	0.667702	0.145202	4.59843	4.26e-06	1.51e-05	FOXD4
ENSG00000169181	5.08265	-3.70543	1.03636	-3.57544	0.000349644	0.00100819	GSG1L		ENSG00000150527	258.421	0.668072	0.110701	6.03491	1.59e-09	7.46e-09	MIA2
ENSG00000213846	18.3025	-3.70397	0.510232	-7.25939	3.89e-13	2.32e-12	#N/A		ENSG00000135605	113.688	0.66822	0.189936	3.51814	0.000434588	0.00123742	TEC
ENSG00000254535	43.9676	-3.70138	0.342691	-10.8009	3.41e-27	3.99e-26	PABPC4L		ENSG00000113719	15911.3	0.668459	0.055431	12.0593	1.73e-33	2.53e-32	ERGIC1
ENSG00000166501	180.221	-3.70133	0.204145	-18.1309	1.82e-73	7.62e-72	PRKCB		ENSG00000185386	887.73	0.668502	0.080963	8.25688	1.5e-16	1.07e-15	MAPK11
ENSG00000081479	60.917	-3.7013	0.312696	-11.8368	2.52e-32	3.55e-31	LRP2		ENSG00000161381	49.3917	0.66877	0.240585	2.77976	0.00543989	0.013259	PLXDC1
ENSG00000170537	37.8972	-3.69643	0.381045	-9.70078	2.99e-22	2.82e-21	TMC7		ENSG00000214756	197.773	0.669485	0.15609	4.28908	1.79e-05	5.99e-05	CSKMT
ENSG00000231764	41.3146	-3.69541	0.33102	-11.1637	6.14e-29	7.69e-28	DLX6-AS1		ENSG00000233922	699.206	0.669511	0.072528	9.23107	2.68e-20	2.3e-19	LINC01694
ENSG00000006377	43.0848	-3.69507	0.377393	-9.79106	1.23e-22	1.18e-21	DLX6		ENSG00000138448	2397.38	0.66959	0.038844	17.2379	1.38e-66	4.99e-65	ITGAV
ENSG00000149295	6.58582	-3.69331	0.902474	-4.09243	4.27e-05	0.000137461	DRD2		ENSG00000265778	236.982	0.669888	0.113235	5.9159	3.3e-09	1.52e-08	AC018413.1
ENSG00000143032	21.8134	-3.69245	0.474119	-7.78803	6.81e-15	4.49e-14	BARHL2		ENSG00000139625	401.775	0.670081	0.0947916	7.06899	1.56e-12	9.02e-12	MAP3K12
ENSG00000165323	141.338	-3.69011	0.194056	-19.0157	1.26e-80	6.16e-79	FAT3		ENSG00000161955	433.287	0.67017	0.0878991	7.62431	2.45e-14	1.57e-13	TNFSF13
ENSG00000234456	415.714	-3.68972	0.118968	-31.0144	3.45e-211	1.14e-208	MAGI2-AS3		ENSG00000150093	7498.71	0.6702	0.0345765	19.3831	1.07e-83	5.63e-82	ITGB1
ENSG00000163710	127.437	-3.68816	0.204144	-18.0664	5.86e-73	2.44e-71	PCOLCE2		ENSG00000203724	169.567	0.670487	0.178997	3.7458	0.000179817	0.000536212	C1orf53
ENSG00000270036	2.93666	-3.68786	1.50045	-2.45784	0.0139774	0.0315117	AC027243.2		ENSG00000085117	595.601	0.670504	0.0885038	7.576	3.56e-14	2.26e-13	CD82
ENSG00000247157	5.25187	-3.68606	1.08224	-3.40594	0.000659357	0.00183299	LINC01252		ENSG00000278385	121.202	0.670654	0.165638	4.04891	5.15e-05	0.000164051	AC121338.2
ENSG00000069188	159.764	-3.68591	0.203241	-18.1356	1.67e-73	7e-72	SDK2		ENSG00000196782	630.99	0.67121	0.0904683	7.41929	1.18e-13	7.26e-13	MAML3
ENSG00000248124	82.3802	-3.67993	0.244945	-15.0235	5.15e-51	1.27e-49	RRN3P1		ENSG00000155158	1577.94	0.671302	0.0684329	9.80964	1.02e-22	9.91e-22	TTC39B
ENSG00000228158	2.61667	-3.6775	1.42649	-2.578	0.00993737	0.0230539	TLE1P1		ENSG00000078699	2073.27	0.671442	0.0610238	11.003	3.7e-28	4.48e-27	CBFA2T2
ENSG00000128652	3.94621	-3.6773	1.16512	-3.15614	0.0015987	0.00421541	HOXD3		ENSG00000108309	102.345	0.671741	0.165606	4.05625	4.99e-05	0.000159369	RUNDC3A
ENSG00000236532	3.55196	-3.67557	1.0909	-3.36931	0.00075357	0.00207871	LINC01695		ENSG00000256417	80.0811	0.672395	0.194147	3.46332	0.000533547	0.00149885	AC006206.2
ENSG00000125864	52.4715	-3.67234	0.305876	-12.006	3.31e-33	4.79e-32	BFSP1		ENSG00000240370	83.6292	0.672414	0.221243	3.03926	0.00237161	0.00609228	RPL13P5
ENSG00000230453	52.7746	-3.66888	0.322219	-11.3863	4.89e-30	6.37e-29	ANKRD18B		ENSG00000160588	931.53	0.672847	0.0655226	10.2689	9.73e-25	1.02e-23	MPZL3
ENSG00000174469	368.706	-3.66753	0.141159	-25.9816	8e-149	1.24e-146	CNTNAP2		ENSG00000125148	2201.79	0.672868	0.138946	4.84266	1.28e-06	4.78e-06	MT2A
ENSG00000117322	19.239	-3.6665	0.522034	-7.0235	2.16e-12	1.24e-11	CR2		ENSG00000171612	5127.18	0.673035	0.0437975	15.367	2.73e-53	7.2e-52	SLC25A33
ENSG00000261797	3.38519	-3.65771	1.30928	-2.79368	0.00521118	0.0127445	AC073878.2		ENSG00000032742	842.358	0.673125	0.0660684	10.1883	2.24e-24	2.32e-23	IFT88
ENSG00000176678	19.0206	-3.65726	0.527657	-6.93113	4.17e-12	2.35e-11	FOXL1		ENSG00000135241	2298.9	0.673406	0.0469142	14.354	1.01e-46	2.2e-45	PNPLA8
ENSG00000152229	182.679	-3.65513	0.159561	-22.9074	3.92e-116	3.63e-114	PSTPIP2		ENSG00000239467	675.747	0.673541	0.0822116	8.19277	2.55e-16	1.81e-15	AC007405.3
ENSG00000143891	130.613	-3.65509	0.203699	-17.9436	5.38e-72	2.2e-70	GALM		ENSG00000110723	536.336	0.6744	0.099572	6.77299	1.26e-11	6.88e-11	EXPH5
ENSG00000159640	33.8894	-3.65492	0.409633	-8.92242	4.56e-19	3.71e-18	ACE		ENSG00000130517	1896.8	0.674794	0.0603484	11.1816	5.02e-29	6.3e-28	PGPEP1
ENSG00000128710	267.673	-3.65218	0.142059	-25.709	9.28e-146	1.39e-143	HOXD10		ENSG00000188554	5516.13	0.674879	0.0382614	17.6386	1.24e-69	4.76e-68	NBR1
ENSG00000102755	124.051	-3.64887	0.19903	-18.3332	4.49e-75	1.95e-73	FLT1		ENSG00000140993	137.638	0.675007	0.159412	4.23437	2.29e-05	7.57e-05	TIGD7
ENSG00000123243	9.32173	-3.64855	0.796969	-4.57803	4.69e-06	1.66e-05	ITIH5		ENSG00000279207	462.09	0.675299	0.0929657	7.26396	3.76e-13	2.25e-12	AC015813.6
ENSG00000165512	204.927	-3.64823	0.171948	-21.2171	6.64e-100	4.65e-98	ZNF22		ENSG00000080031	28.9697	0.675612	0.272624	2.47819	0.0132052	0.0299204	PTPRH
ENSG00000021355	98.8724	-3.64579	0.228557	-15.9513	2.79e-57	8.07e-56	SERPINB1		ENSG00000275202	52.473	0.675818	0.292269	2.31232	0.0207603	0.0449244	AL161421.1
ENSG00000235501	16.2377	-3.64541	0.537264	-6.78515	1.16e-11	6.34e-11	AC105942.1		ENSG00000161204	2283.15	0.676129	0.0432862	15.62	5.32e-55	1.46e-53	ABCF3
ENSG00000128656	144.802	-3.64476	0.194778	-18.7124	3.92e-78	1.81e-76	CHN1		ENSG00000261505	118.991	0.676335	0.147732	4.57813	4.69e-06	1.66e-05	AL031714.1
ENSG00000144451	182.989	-3.6441	0.18368	-19.8394	1.36e-87	7.67e-86	SPAG16		ENSG00000003147	1636.48	0.676381	0.0587169	11.5193	1.05e-30	1.4e-29	ICA1
ENSG00000112319	240.982	-3.64356	0.147208	-24.7511	3.02e-135	3.72e-133	EYA4		ENSG00000119048	1138.1	0.676444	0.0781545	8.65521	4.92e-18	3.81e-17	UBE2B
ENSG00000135324	16.1394	-3.64289	0.572699	-6.36091	2.01e-10	1.01e-09	MRAP2		ENSG00000172432	5032.69	0.677168	0.0435331	15.5552	1.47e-54	3.98e-53	GTPBP2
ENSG00000166173	321.271	-3.64047	0.157382	-23.1315	2.23e-118	2.17e-116	LARP6		ENSG00000185010	307.91	0.677246	0.112453	6.0225	1.72e-09	8.04e-09	F8
ENSG00000228577	2.51234	-3.63911	1.36882	-2.65857	0.00784731	0.018583	AC010731.2		ENSG00000170092	62.3243	0.677413	0.261164	2.59383	0.00949145	0.0221052	SPDYE5
ENSG00000197343	502.975	-3.63604	0.113052	-32.1624	5.93e-227	2.43e-224	ZNF655		ENSG00000253982	467.267	0.677688	0.106971	6.33528	2.37e-10	1.18e-09	AC100810.1
ENSG00000157168	2.18842	-3.63568	1.43205	-2.53878	0.0111239	0.0255969	NRG1		ENSG00000146950	1048.71	0.677814	0.0842034	8.04972	8.3e-16	5.75e-15	SHROOM2
ENSG00000225492	14.6068	-3.63538	0.603859	-6.02025	1.74e-09	8.14e-09	GBP1P1		ENSG00000147041	51.9532	0.677967	0.234034	2.89687	0.00376909	0.0094205	SYTL5
ENSG00000170961	7.69224	-3.63251	0.815177	-4.4561	8.35e-06	2.88e-05	HAS2		ENSG00000196366	81.3311	0.677991	0.185445	3.65602	0.00025616	0.000749878	C9orf163
ENSG00000150625	40.3269	-3.62929	0.33542	-10.8201	2.76e-27	3.25e-26	GPM6A		ENSG00000273472	95.8581	0.67839	0.1734	3.91228	9.14e-05	0.000283275	AC096733.2
ENSG00000164161	40.0188	-3.62613	0.363836	-9.96638	2.14e-23	2.13e-22	HHIP		ENSG00000272079	51.0919	0.678408	0.245202	2.76673	0.0056621	0.0137482	AC004233.2
ENSG00000103485	301.005	-3.6209	0.12822	-28.2397	1.9e-175	4.05e-173	QPRT		ENSG00000185432	1265.43	0.678505	0.0646173	10.5004	8.6e-26	9.48e-25	METTL7A
ENSG00000151689	60.2794	-3.61934	0.287229	-12.6009	2.09e-36	3.34e-35	INPP1		ENSG00000177570	373.825	0.678671	0.10077	6.73482	1.64e-11	8.88e-11	SAMD12
ENSG00000138136	42.1234	-3.61587	0.325057	-11.1238	9.61e-29	1.19e-27	LBX1		ENSG00000128564	437.077	0.678727	0.0965593	7.02912	2.08e-12	1.19e-11	VGF
ENSG00000235774	9.12404	-3.61369	0.769627	-4.69538	2.66e-06	9.63e-06	AC023347.1		ENSG00000117984	5721.79	0.678758	0.109036	6.22506	4.81e-10	2.35e-09	CTSD
ENSG00000171533	31.3002	-3.61129	0.387624	-9.31646	1.2e-20	1.05e-19	MAP6		ENSG00000122547	607.564	0.678913	0.0954209	7.11493	1.12e-12	6.51e-12	EEPD1
ENSG00000173376	15.2074	-3.61059	0.577523	-6.25185	4.06e-10	1.99e-09	NDNF		ENSG00000143507	130.937	0.679361	0.160891	4.22249	2.42e-05	7.96e-05	DUSP10
ENSG00000136960	13.3653	-3.6062	0.626073	-5.76004	8.41e-09	3.75e-08	ENPP2		ENSG00000157240	982.696	0.679613	0.068772	9.88212	4.98e-23	4.88e-22	FZD1
ENSG00000168124	1.95269	-3.60187	1.52321	-2.36466	0.0180468	0.0396075	OR1F1		ENSG00000124496	930.958	0.679812	0.0913041	7.44558	9.65e-14	5.99e-13	TRERF1
ENSG00000197496	90.2408	-3.60113	0.242131	-14.8727	4.96e-50	1.19e-48	SLC2A10		ENSG00000150672	37.6497	0.679816	0.273693	2.48386	0.0129967	0.0294991	DLG2
ENSG00000103449	225.38	-3.60057	0.149821	-24.0324	1.28e-127	1.39e-125	SALL1		ENSG00000272288	145.848	0.679833	0.181145	3.75297	0.000174753	0.000521906	AL451165.2
ENSG00000162881	4.00635	-3.60002	1.10697	-3.25213	0.00114543	0.00308504	OXER1		ENSG00000078070	2165.07	0.679972	0.0485233	14.0133	1.29e-44	2.64e-43	MCCC1
ENSG00000146555	112.442	-3.59979	0.22106	-16.2842	1.28e-59	3.87e-58	SDK1		ENSG00000132356	4524.77	0.680063	0.0407306	16.6966	1.39e-62	4.51e-61	PRKAA1
ENSG00000255326	4.1389	-3.59859	1.06669	-3.3736	0.000741918	0.00204846	AP001922.5		ENSG00000239382	73.904	0.680188	0.221074	3.07674	0.00209276	0.00542296	ALKBH6
ENSG00000152661	177.59	-3.59666	0.17689	-20.3327	6.6e-92	4.04e-90	GJA1		ENSG00000273314	226.642	0.680505	0.143545	4.74072	2.13e-06	7.77e-06	AC005229.4
ENSG00000171804	1.81701	-3.59609	1.55678	-2.30996	0.0208906	0.0451815	WDR87		ENSG00000172780	219.958	0.680724	0.125699	5.41551	6.11e-08	2.56e-07	RAB43
ENSG00000010361	398.326	-3.59447	0.11519	-31.2046	9.23e-214	3.17e-211	FUZ		ENSG00000145819	1090.67	0.681117	0.0663668	10.2629	1.04e-24	1.09e-23	ARHGAP26
ENSG00000147613	9.04322	-3.59222	0.801001	-4.48466	7.3e-06	2.53e-05	PSKH2		ENSG00000113552	2374.24	0.681135	0.0651331	10.4576	1.35e-25	1.47e-24	GNPDA1
ENSG00000261115	254.476	-3.5888	0.141275	-25.403	2.34e-142	3.3e-140	TMEM178B		ENSG00000076604	4640.11	0.681555	0.047456	14.3618	8.98e-47	1.97e-45	TRAF4
ENSG00000185008	78.5979	-3.58746	0.251475	-14.2657	3.58e-46	7.72e-45	ROBO2		ENSG00000135750	1221.05	0.681753	0.0535913	12.7213	4.5e-37	7.38e-36	KCNK1
ENSG00000253187	26.3328	-3.58659	0.431086	-8.3199	8.8e-17	6.41e-16	HOXA10-AS		ENSG00000261824	1001.44	0.681884	0.0580537	11.7457	7.43e-32	1.03e-30	LINC00662
ENSG00000165973	43.7626	-3.58057	0.332301	-10.7751	4.51e-27	5.25e-26	NELL1		ENSG00000136003	2933.38	0.681975	0.0683912	9.97167	2.03e-23	2.02e-22	ISCU
ENSG00000188906	23.5044	-3.58051	0.428493	-8.35605	6.49e-17	4.76e-16	LRRK2		ENSG00000141736	4902.5	0.682168	0.0630357	10.8219	2.71e-27	3.19e-26	ERBB2
ENSG00000225930	7.8015	-3.5795	0.762777	-4.69273	2.7e-06	9.75e-06	LINC02249		ENSG00000260588	73.046	0.6824	0.251039	2.7183	0.0065619	0.0157549	AC027702.1
ENSG00000183023	38.9809	-3.57931	0.368428	-9.71509	2.6e-22	2.46e-21	SLC8A1		ENSG00000168067	1519.8	0.682576	0.0742845	9.18866	3.98e-20	3.38e-19	MAP4K2
ENSG00000101115	23.3147	-3.57875	0.501247	-7.1397	9.35e-13	5.46e-12	SALL4		ENSG00000259673	335.79	0.682589	0.0996611	6.8491	7.43e-12	4.12e-11	IQCH-AS1
ENSG00000259439	1.97206	-3.57063	1.53672	-2.32354	0.0201502	0.0437387	LINC01833		ENSG00000206190	279.364	0.682602	0.12034	5.67228	1.41e-08	6.17e-08	ATP10A
ENSG00000149294	496.554	-3.56758	0.107013	-33.3379	1.09e-243	5.45e-241	NCAM1		ENSG00000091140	11357	0.682682	0.0429563	15.8925	7.14e-57	2.05e-55	DLD
ENSG00000233215	25.8521	-3.56713	0.436202	-8.17771	2.89e-16	2.04e-15	LINC01687		ENSG00000184709	1258.7	0.682701	0.146808	4.65029	3.31e-06	1.19e-05	LRRC26
ENSG00000134198	41.518	-3.56338	0.346288	-10.2902	7.8e-25	8.25e-24	TSPAN2		ENSG00000088002	277.637	0.683511	0.131157	5.2114	1.87e-07	7.54e-07	SULT2B1
ENSG00000205879	4.74839	-3.56032	1.47794	-2.40898	0.0159974	0.035564	FAM90A2P		ENSG00000220842	287.864	0.683805	0.151045	4.52717	5.98e-06	2.09e-05	RPL21P16
ENSG00000282933	5.752	-3.55922	1.03943	-3.42421	0.000616588	0.00172018	RHOXF1P3		ENSG00000103253	1491.67	0.68409	0.0554162	12.3446	5.21e-35	8.02e-34	HAGHL
ENSG00000229807	30514.6	-3.55904	0.131288	-27.1086	7.8e-162	1.41e-159	XIST		ENSG00000066926	5560.35	0.684182	0.0411295	16.6348	3.9e-62	1.26e-60	FECH
ENSG00000279170	2.43524	-3.55898	1.54518	-2.30327	0.0212635	0.0459086	TSTD3		ENSG00000145687	526.369	0.684344	0.0852958	8.02318	1.03e-15	7.1e-15	SSBP2
ENSG00000138738	109.263	-3.55841	0.210138	-16.9337	2.54e-64	8.7e-63	PRDM5		ENSG00000189077	1511.57	0.684361	0.0574875	11.9045	1.12e-32	1.6e-31	TMEM120A
ENSG00000106128	7.81408	-3.55822	1.32712	-2.68116	0.00733675	0.0174612	GHRHR		ENSG00000232434	1293.68	0.684916	0.0750787	9.12264	7.33e-20	6.17e-19	AJM1
ENSG00000128714	459.737	-3.55808	0.120077	-29.6315	5.87e-193	1.6e-190	HOXD13		ENSG00000167183	1554.8	0.685105	0.0649255	10.5522	4.96e-26	5.53e-25	PRR15L
ENSG00000178202	918.213	-3.55804	0.0783087	-45.4361	0	0	POGLUT3		ENSG00000160200	3081.52	0.685243	0.0510477	13.4236	4.4e-41	8.22e-40	CBS
ENSG00000165152	259.824	-3.55686	0.13517	-26.314	1.33e-152	2.17e-150	TMEM246		ENSG00000258366	49.6483	0.685281	0.249783	2.7435	0.00607871	0.0146832	RTEL1
ENSG00000112238	51.9613	-3.55684	0.300664	-11.8299	2.73e-32	3.85e-31	PRDM13		ENSG00000143590	347.877	0.68541	0.0974003	7.03703	1.96e-12	1.13e-11	EFNA3
ENSG00000170801	70.1536	-3.55641	0.282759	-12.5775	2.81e-36	4.48e-35	HTRA3		ENSG00000166750	1364.5	0.685451	0.0772223	8.87634	6.91e-19	5.57e-18	SLFN5
ENSG00000270885	106.463	-3.55509	0.217232	-16.3654	3.38e-60	1.04e-58	RASL10B		ENSG00000067836	1674.67	0.685487	0.0605719	11.3169	1.08e-29	1.39e-28	ROGDI
ENSG00000084628	63.88	-3.55291	0.356226	-9.97376	1.99e-23	1.98e-22	NKAIN1		ENSG00000059378	987.972	0.685568	0.0712859	9.61715	6.77e-22	6.28e-21	PARP12
ENSG00000182013	536.566	-3.55178	0.101284	-35.0674	2.12e-269	1.42e-266	PNMA8A		ENSG00000157870	2049.76	0.68588	0.0612572	11.1967	4.23e-29	5.32e-28	PRXL2B
ENSG00000276354	6.48877	-3.55114	0.963918	-3.68406	0.000229544	0.000675271	#N/A		ENSG00000176532	93.6775	0.685901	0.215041	3.18963	0.00142455	0.00378928	PRR15
ENSG00000165556	179.736	-3.55073	0.160246	-22.1579	8.75e-109	7.11e-107	CDX2		ENSG00000261652	169.554	0.685973	0.153122	4.47991	7.47e-06	2.59e-05	C15orf65
ENSG00000196376	107.093	-3.55037	0.216961	-16.3641	3.45e-60	1.06e-58	SLC35F1		ENSG00000062282	807.315	0.686015	0.0664109	10.3299	5.16e-25	5.49e-24	DGAT2
ENSG00000184867	17.3324	-3.54936	0.616107	-5.76094	8.36e-09	3.73e-08	ARMCX2		ENSG00000167702	1274.23	0.686033	0.0652991	10.506	8.11e-26	8.95e-25	KIFC2
ENSG00000196440	80.5993	-3.54632	0.237507	-14.9314	2.06e-50	5e-49	ARMCX4		ENSG00000176046	13176.6	0.686033	0.0475765	14.4196	3.9e-47	8.65e-46	NUPR1
ENSG00000203877	5.50438	-3.5459	0.960661	-3.6911	0.000223289	0.000658065	RIPPLY2		ENSG00000012171	487.383	0.686135	0.0836855	8.19898	2.42e-16	1.72e-15	SEMA3B
ENSG00000102452	2.85868	-3.53926	1.23543	-2.86481	0.00417261	0.0103659	NALCN		ENSG00000185507	1953.08	0.686138	0.058754	11.6782	1.65e-31	2.26e-30	IRF7
ENSG00000173917	76.8706	-3.53883	0.253803	-13.9432	3.46e-44	6.95e-43	HOXB2		ENSG00000146955	183.68	0.686376	0.150742	4.5533	5.28e-06	1.86e-05	RAB19
ENSG00000161940	139.198	-3.53851	0.208687	-16.956	1.74e-64	5.99e-63	BCL6B		ENSG00000125826	4583.03	0.686545	0.0443914	15.4657	5.91e-54	1.58e-52	RBCK1
ENSG00000130433	9.49369	-3.53775	0.691765	-5.11409	3.15e-07	1.25e-06	CACNG6		ENSG00000162852	1406.55	0.686768	0.0504428	13.6148	3.27e-42	6.29e-41	CNST
ENSG00000174460	31.9716	-3.53724	0.36575	-9.67121	4e-22	3.74e-21	ZCCHC12		ENSG00000111490	1154.16	0.6874	0.0727215	9.45251	3.31e-21	2.97e-20	TBC1D30
ENSG00000276538	2.38337	-3.53649	1.42721	-2.4779	0.0132159	0.0299398	AC092666.2		ENSG00000267278	110.257	0.687624	0.169686	4.05234	5.07e-05	0.000161852	MAP3K14-AS1
ENSG00000175414	592.713	-3.53081	0.105431	-33.4893	6.89e-246	3.51e-243	ARL10		ENSG00000243810	45.4844	0.687856	0.248508	2.76795	0.00564109	0.0137093	AL121721.1
ENSG00000184347	65.7483	-3.52972	0.266458	-13.2468	4.71e-40	8.47e-39	SLIT3		ENSG00000266714	633.474	0.688056	0.105542	6.51924	7.07e-11	3.66e-10	MYO15B
ENSG00000175183	341.054	-3.52943	0.127923	-27.5903	1.45e-167	2.78e-165	CSRP2		ENSG00000138496	641.091	0.68813	0.0774525	8.88455	6.42e-19	5.18e-18	PARP9
ENSG00000139117	114.183	-3.5267	0.210427	-16.7597	4.81e-63	1.58e-61	CPNE8		ENSG00000253200	35.0553	0.688267	0.26267	2.62027	0.00878591	0.0205981	AC037459.2
ENSG00000223561	11.0068	-3.52279	0.703132	-5.01015	5.44e-07	2.1e-06	AC005165.1		ENSG00000181826	102.49	0.688345	0.176147	3.90778	9.31e-05	0.000288406	RELL1
ENSG00000186469	18.2403	-3.52147	0.50401	-6.98691	2.81e-12	1.6e-11	GNG2		ENSG00000043093	1538.78	0.688392	0.0630304	10.9216	9.09e-28	1.09e-26	DCUN1D1
ENSG00000250654	16.1891	-3.52084	0.532355	-6.61371	3.75e-11	1.98e-10	AC023794.4		ENSG00000164308	66.7162	0.688905	0.197855	3.48187	0.000497917	0.0014058	ERAP2
ENSG00000228223	94.9975	-3.52024	0.245281	-14.3518	1.04e-46	2.27e-45	HCG11		ENSG00000250159	40.2137	0.689357	0.258654	2.66517	0.00769499	0.0182585	AC106791.1
ENSG00000280079	3.44029	-3.52022	1.27195	-2.76757	0.00564763	0.0137203	AC011447.7		ENSG00000124664	4159.6	0.689483	0.07478	9.22015	2.97e-20	2.54e-19	SPDEF
ENSG00000137273	237.247	-3.51941	0.156049	-22.5532	1.25e-112	1.07e-110	FOXF2		ENSG00000165813	2138.74	0.690184	0.0470721	14.6623	1.12e-48	2.62e-47	CCDC186
ENSG00000164687	87.0153	-3.51876	0.247058	-14.2426	4.98e-46	1.07e-44	FABP5		ENSG00000075643	2788.19	0.690447	0.0511814	13.4902	1.79e-41	3.37e-40	MOCOS
ENSG00000116833	17.9737	-3.51847	0.583969	-6.0251	1.69e-09	7.92e-09	NR5A2		ENSG00000234028	168.733	0.690765	0.148596	4.64861	3.34e-06	1.2e-05	EIF2AK3-DT
ENSG00000253123	119.093	-3.51532	0.212671	-16.5294	2.25e-61	7.12e-60	AC091182.1		ENSG00000176884	266.888	0.690803	0.138119	5.00151	5.69e-07	2.19e-06	GRIN1
ENSG00000213366	161.69	-3.5124	0.18723	-18.7598	1.61e-78	7.54e-77	GSTM2		ENSG00000131711	5684.58	0.691157	0.0558965	12.3649	4.04e-35	6.25e-34	MAP1B
ENSG00000155970	54.1943	-3.51222	0.324595	-10.8203	2.76e-27	3.24e-26	MICU3		ENSG00000133019	408.277	0.691863	0.0904971	7.64514	2.09e-14	1.34e-13	CHRM3
ENSG00000197291	23.1584	-3.50828	0.473486	-7.40946	1.27e-13	7.8e-13	RAMP2-AS1		ENSG00000083807	588.491	0.692343	0.105501	6.56243	5.29e-11	2.77e-10	SLC27A5
ENSG00000101680	446.166	-3.50613	0.167155	-20.9753	1.1e-97	7.4e-96	LAMA1		ENSG00000080709	364.901	0.692367	0.128045	5.40723	6.4e-08	2.67e-07	KCNN2
ENSG00000137817	355.41	-3.50584	0.124335	-28.1967	6.42e-175	1.36e-172	PARP6		ENSG00000067601	113.137	0.69245	0.171027	4.04876	5.15e-05	0.000164134	PMS2P4
ENSG00000146281	450.496	-3.50176	0.114483	-30.5875	1.79e-205	5.54e-203	PM20D2		ENSG00000229729	92.4841	0.692469	0.172333	4.01821	5.86e-05	0.000185624	#N/A
ENSG00000105877	46.4076	-3.50119	0.322908	-10.8427	2.16e-27	2.55e-26	DNAH11		ENSG00000250539	47.6696	0.6925	0.237625	2.91425	0.00356544	0.00893912	KRT8P33
ENSG00000180815	59.1881	-3.5009	0.283082	-12.3671	3.94e-35	6.09e-34	MAP3K15		ENSG00000173915	3751.15	0.692561	0.115005	6.02199	1.72e-09	8.06e-09	ATP5MD
ENSG00000259660	54.4281	-3.49865	0.285182	-12.2681	1.34e-34	2.03e-33	DNM1P47		ENSG00000184381	757.521	0.692616	0.0755993	9.16168	5.11e-20	4.32e-19	PLA2G6
ENSG00000147180	746.835	-3.49857	0.0966958	-36.1812	1.2e-286	1.07e-283	ZNF711		ENSG00000219200	107.567	0.692718	0.179164	3.8664	0.000110454	0.000338742	RNASEK
ENSG00000114948	123.812	-3.49678	0.191499	-18.26	1.72e-74	7.41e-73	ADAM23		ENSG00000188603	64.611	0.692839	0.254535	2.72198	0.00648927	0.0156009	CLN3
ENSG00000162676	120.08	-3.49135	0.208705	-16.7287	8.1e-63	2.65e-61	GFI1		ENSG00000188372	1504.92	0.692981	0.0779071	8.89496	5.84e-19	4.73e-18	ZP3
ENSG00000067445	262.398	-3.48959	0.154433	-22.5962	4.72e-113	4.12e-111	TRO		ENSG00000160325	1100.39	0.693086	0.0711553	9.74046	2.03e-22	1.93e-21	CACFD1
ENSG00000101298	49.0084	-3.48913	0.304736	-11.4497	2.36e-30	3.11e-29	SNPH		ENSG00000170745	232.605	0.693178	0.121532	5.70369	1.17e-08	5.17e-08	KCNS3
ENSG00000206052	4.28713	-3.4832	1.10213	-3.16041	0.00157545	0.00415886	DOK6		ENSG00000165678	18959	0.693239	0.0480364	14.4315	3.28e-47	7.29e-46	GHITM
ENSG00000271967	2.09744	-3.48024	1.40161	-2.48303	0.0130271	0.0295608	AL583856.2		ENSG00000165125	788.259	0.693619	0.0704853	9.84061	7.53e-23	7.32e-22	TRPV6
ENSG00000118257	139.252	-3.47595	0.203556	-17.0762	2.23e-65	7.89e-64	NRP2		ENSG00000106526	138.979	0.69365	0.178848	3.87843	0.000105135	0.000323222	ACTR3C
ENSG00000223652	18.9969	-3.4751	0.48402	-7.17968	6.99e-13	4.12e-12	AC106786.1		ENSG00000235280	243.766	0.693771	0.121893	5.69166	1.26e-08	5.54e-08	MCF2L-AS1
ENSG00000170837	326.41	-3.47458	0.140895	-24.6607	2.83e-134	3.41e-132	GPR27		ENSG00000150459	6201.5	0.69445	0.0765819	9.06807	1.21e-19	1.01e-18	SAP18
ENSG00000128709	111.186	-3.47419	0.218442	-15.9044	5.91e-57	1.7e-55	HOXD9		ENSG00000162004	803.554	0.694665	0.100602	6.9051	5.02e-12	2.81e-11	CCDC78
ENSG00000134853	2.85716	-3.4706	1.30097	-2.66769	0.00763746	0.0181361	PDGFRA		ENSG00000221843	105.482	0.694858	0.166474	4.17398	2.99e-05	9.77e-05	C2orf16
ENSG00000183072	347.557	-3.47012	0.116908	-29.6825	1.29e-193	3.59e-191	NKX2-5		ENSG00000188095	123.612	0.695052	0.185274	3.75149	0.000175786	0.000524763	MESP2
ENSG00000163064	83.1953	-3.46865	0.264598	-13.1091	2.92e-39	5.11e-38	EN1		ENSG00000082196	49.2621	0.695152	0.261048	2.66292	0.00774652	0.0183681	C1QTNF3
ENSG00000149305	4.6347	-3.46853	1.14858	-3.01985	0.00252897	0.00647396	HTR3B		ENSG00000168159	19453.9	0.695175	0.0629712	11.0396	2.46e-28	3.01e-27	RNF187
ENSG00000067842	19.843	-3.46561	0.484041	-7.15975	8.08e-13	4.74e-12	ATP2B3		ENSG00000261335	50.3089	0.6952	0.264792	2.62546	0.0086533	0.0203167	AC005837.1
ENSG00000151617	31.4566	-3.46462	0.387893	-8.93189	4.19e-19	3.41e-18	EDNRA		ENSG00000100592	1263.89	0.696693	0.0631095	11.0394	2.47e-28	3.01e-27	DAAM1
ENSG00000002746	12.9776	-3.46322	0.576837	-6.00382	1.93e-09	8.98e-09	HECW1		ENSG00000224152	52.0221	0.696696	0.219387	3.17564	0.00149504	0.00396146	AC009506.1
ENSG00000225177	239.011	-3.46123	0.150074	-23.0635	1.08e-117	1.03e-115	AL590617.2		ENSG00000249348	133.25	0.697093	0.13661	5.10281	3.35e-07	1.32e-06	UGDH-AS1
ENSG00000274341	18.0873	-3.45856	0.564193	-6.1301	8.78e-10	4.2e-09	AC005899.6		ENSG00000186174	3055.93	0.697266	0.0726289	9.6004	7.96e-22	7.36e-21	BCL9L
ENSG00000179314	150.941	-3.45782	0.191439	-18.0622	6.32e-73	2.63e-71	WSCD1		ENSG00000261220	88.1743	0.697322	0.184439	3.78078	0.000156336	0.000469861	AC103706.1
ENSG00000137338	78.5059	-3.45711	0.246093	-14.048	7.92e-45	1.63e-43	PGBD1		ENSG00000188549	1078.41	0.697953	0.0730657	9.55241	1.27e-21	1.16e-20	CCDC9B
ENSG00000253250	45.7073	-3.45651	0.31271	-11.0534	2.11e-28	2.59e-27	C8orf88		ENSG00000130529	1432.95	0.69804	0.0715993	9.74926	1.86e-22	1.77e-21	TRPM4
ENSG00000145826	7.28031	-3.45546	0.815846	-4.23543	2.28e-05	7.54e-05	LECT2		ENSG00000234753	102.077	0.698147	0.182781	3.81959	0.000133674	0.000405745	FOXP4-AS1
ENSG00000138675	6.76405	-3.45526	0.887315	-3.89406	9.86e-05	0.000304027	FGF5		ENSG00000224546	50.2551	0.698154	0.280755	2.48671	0.0128932	0.0292859	EIF4BP3
ENSG00000147251	387.95	-3.45502	0.123738	-27.922	1.44e-171	2.96e-169	DOCK11		ENSG00000138495	1524.71	0.698166	0.137482	5.07823	3.81e-07	1.5e-06	COX17
ENSG00000143171	8.82827	-3.45492	0.762025	-4.53386	5.79e-06	2.03e-05	RXRG		ENSG00000127666	493.409	0.698204	0.110363	6.32646	2.51e-10	1.25e-09	TICAM1
ENSG00000157851	530.94	-3.4524	0.0952423	-36.2486	1.04e-287	9.57e-285	DPYSL5		ENSG00000131495	1113.23	0.698333	0.11382	6.1354	8.49e-10	4.07e-09	NDUFA2
ENSG00000162367	11.9134	-3.45129	0.61378	-5.62302	1.88e-08	8.15e-08	TAL1		ENSG00000271254	1101.36	0.698529	0.0686271	10.1786	2.47e-24	2.55e-23	AC240274.1
ENSG00000136404	7.21687	-3.45025	0.752915	-4.58252	4.59e-06	1.63e-05	TM6SF1		ENSG00000232888	36.165	0.698801	0.280649	2.48995	0.0127763	0.0290587	RPS11P5
ENSG00000093144	466.288	-3.44992	0.112589	-30.6416	3.42e-206	1.07e-203	ECHDC1		ENSG00000146802	1818.28	0.699144	0.0549802	12.7163	4.8e-37	7.85e-36	TMEM168
ENSG00000171056	30.6557	-3.44978	0.38777	-8.89644	5.77e-19	4.67e-18	SOX7		ENSG00000127084	78.5559	0.699733	0.224967	3.11038	0.00186845	0.00487432	FGD3
ENSG00000122378	349.916	-3.44974	0.124363	-27.7392	2.35e-169	4.65e-167	PRXL2A		ENSG00000256196	45.7808	0.699743	0.243416	2.87468	0.00404438	0.010071	AP003721.1
ENSG00000170915	151.079	-3.44743	0.185681	-18.5664	6.01e-77	2.71e-75	PAQR8		ENSG00000217648	53.86	0.699848	0.21174	3.30523	0.000948999	0.0025846	AL136116.3
ENSG00000136574	123.546	-3.44508	0.197777	-17.419	5.92e-68	2.17e-66	GATA4		ENSG00000146826	824.393	0.699908	0.0782114	8.94892	3.59e-19	2.93e-18	MAP11
ENSG00000237594	38.168	-3.44341	0.340055	-10.126	4.24e-24	4.34e-23	AP000251.1		ENSG00000183828	805.695	0.700293	0.0835557	8.38115	5.24e-17	3.86e-16	NUDT14
ENSG00000121297	236.692	-3.44298	0.159941	-21.5266	8.78e-103	6.54e-101	TSHZ3		ENSG00000254986	2001.78	0.700311	0.0572383	12.235	2.02e-34	3.04e-33	DPP3
ENSG00000170989	10.3806	-3.44265	0.701815	-4.90536	9.33e-07	3.52e-06	S1PR1		ENSG00000072210	8048.5	0.700363	0.0311998	22.4476	1.35e-111	1.14e-109	ALDH3A2
ENSG00000198885	135.535	-3.44067	0.184919	-18.6063	2.85e-77	1.3e-75	ITPRIPL1		ENSG00000205133	1013.75	0.70041	0.0785769	8.91368	4.94e-19	4.01e-18	TRIQK
ENSG00000237943	49.4264	-3.43928	0.313733	-10.9625	5.79e-28	6.97e-27	PRKCQ-AS1		ENSG00000149218	6496.89	0.700719	0.0582243	12.0348	2.33e-33	3.39e-32	ENDOD1
ENSG00000084207	888.522	-3.43621	0.0851626	-40.3488	0	0	GSTP1		ENSG00000129646	949.735	0.701194	0.0642614	10.9116	1.01e-27	1.21e-26	QRICH2
ENSG00000137872	40.4008	-3.43258	0.341152	-10.0617	8.16e-24	8.28e-23	SEMA6D		ENSG00000248445	52.3228	0.70137	0.248989	2.81687	0.00484946	0.0119213	SEMA6A-AS1
ENSG00000061455	108.946	-3.42862	0.207599	-16.5155	2.84e-61	8.9e-60	PRDM6		ENSG00000149115	7295.43	0.701431	0.050366	13.9267	4.36e-44	8.75e-43	TNKS1BP1
ENSG00000007264	226.424	-3.42826	0.167684	-20.4448	6.69e-93	4.14e-91	MATK		ENSG00000007384	743.917	0.701891	0.072455	9.68727	3.42e-22	3.2e-21	RHBDF1
ENSG00000113083	110.818	-3.42764	0.235954	-14.5267	8.21e-48	1.86e-46	LOX		ENSG00000143819	11302.9	0.702161	0.0687006	10.2206	1.6e-24	1.67e-23	EPHX1
ENSG00000171551	47.596	-3.42119	0.316574	-10.8069	3.19e-27	3.74e-26	ECEL1		ENSG00000213047	923.971	0.702497	0.0542585	12.9472	2.44e-38	4.16e-37	DENND1B
ENSG00000214336	57.8613	-3.42005	0.282118	-12.1228	8e-34	1.18e-32	FOXI3		ENSG00000153721	828.555	0.702664	0.075	9.36886	7.33e-21	6.46e-20	CNKSR3
ENSG00000171956	38.6934	-3.41553	0.332041	-10.2865	8.11e-25	8.56e-24	FOXB1		ENSG00000111269	2378.69	0.702931	0.0542496	12.9573	2.14e-38	3.67e-37	CREBL2
ENSG00000165588	35.6734	-3.41485	0.3507	-9.73723	2.09e-22	1.99e-21	OTX2		ENSG00000281501	28.5304	0.703237	0.308273	2.28122	0.0225356	0.0484004	SEPSECS-AS1
ENSG00000227640	81.8476	-3.41431	0.240566	-14.1928	1.01e-45	2.14e-44	SOX21-AS1		ENSG00000119979	1331.56	0.703241	0.0619457	11.3525	7.2e-30	9.29e-29	DENND10
ENSG00000261567	4.8489	-3.41371	1.00365	-3.40129	0.00067069	0.00186298	#N/A		ENSG00000278709	257.99	0.703568	0.128718	5.46598	4.6e-08	1.95e-07	NKILA
ENSG00000075340	347.219	-3.41089	0.127533	-26.7451	1.41e-157	2.45e-155	ADD2		ENSG00000214182	135.412	0.703583	0.221638	3.17446	0.00150113	0.00397646	PTMAP5
ENSG00000107719	255.445	-3.4108	0.147545	-23.1169	3.13e-118	3.02e-116	PALD1		ENSG00000280927	264.005	0.703624	0.152529	4.61304	3.97e-06	1.42e-05	CTBP1-AS
ENSG00000129152	5.60066	-3.40982	0.901338	-3.78306	0.000154911	0.000465885	MYOD1		ENSG00000138587	167.857	0.70372	0.136194	5.16706	2.38e-07	9.49e-07	MNS1
ENSG00000131477	10.2424	-3.40392	0.700185	-4.86145	1.17e-06	4.36e-06	RAMP2		ENSG00000127720	198.716	0.704287	0.137942	5.10566	3.3e-07	1.3e-06	METTL25
ENSG00000164741	167.021	-3.40355	0.171698	-19.8229	1.89e-87	1.06e-85	DLC1		ENSG00000247982	29.4443	0.704302	0.302775	2.32616	0.0200101	0.0434653	LINC00926
ENSG00000136573	8.14416	-3.40285	0.715862	-4.7535	2e-06	7.31e-06	BLK		ENSG00000040608	332.578	0.704706	0.119641	5.89016	3.86e-09	1.76e-08	RTN4R
ENSG00000270641	36.6219	-3.39901	0.358377	-9.48445	2.44e-21	2.2e-20	TSIX		ENSG00000163072	194.968	0.704886	0.151858	4.64174	3.45e-06	1.24e-05	NOSTRIN
ENSG00000270926	3.30086	-3.39631	1.21574	-2.79361	0.00521226	0.012746	AC008013.3		ENSG00000198898	4926.19	0.70513	0.0485147	14.5344	7.34e-48	1.66e-46	CAPZA2
ENSG00000181449	61.0017	-3.39466	0.282449	-12.0187	2.84e-33	4.12e-32	SOX2		ENSG00000254996	65.6563	0.705162	0.230013	3.06575	0.00217126	0.00560721	ANKHD1-EIF4EBP3
ENSG00000224854	2.96292	-3.39438	1.39913	-2.42607	0.0152635	0.0341173	CDKN2A-DT		ENSG00000243742	48.4114	0.705317	0.260207	2.7106	0.00671619	0.0160986	RPLP0P2
ENSG00000109944	59.1637	-3.39186	0.276306	-12.2757	1.22e-34	1.85e-33	JHY		ENSG00000175279	96.6352	0.705399	0.216571	3.25713	0.00112544	0.00303477	CENPS
ENSG00000138741	20.1665	-3.39148	0.516991	-6.56003	5.38e-11	2.81e-10	TRPC3		ENSG00000127220	1064.84	0.705437	0.0592835	11.8994	1.19e-32	1.69e-31	ABHD8
ENSG00000135638	50.2263	-3.38456	0.289359	-11.6968	1.32e-31	1.82e-30	EMX1		ENSG00000138311	193.743	0.705483	0.125734	5.61093	2.01e-08	8.72e-08	ZNF365
ENSG00000250682	34.8074	-3.38393	0.360089	-9.39749	5.59e-21	4.95e-20	LINC00491		ENSG00000167419	130.428	0.705945	0.153088	4.61136	4e-06	1.43e-05	LPO
ENSG00000198797	4.09592	-3.38336	1.01085	-3.34705	0.00081676	0.00224222	BRINP2		ENSG00000168306	566.734	0.706085	0.088661	7.96388	1.67e-15	1.13e-14	ACOX2
ENSG00000118231	48.5917	-3.38221	0.305911	-11.0562	2.05e-28	2.51e-27	CRYGD		ENSG00000120451	3371.93	0.706115	0.062702	11.2614	2.03e-29	2.58e-28	SNX19
ENSG00000229151	13.077	-3.37943	0.595526	-5.6747	1.39e-08	6.09e-08	AC233976.1		ENSG00000244560	164.764	0.706354	0.145978	4.83876	1.31e-06	4.86e-06	AC004890.2
ENSG00000182397	16.3761	-3.37498	0.558994	-6.03759	1.56e-09	7.34e-09	DNM1P46		ENSG00000260233	133.615	0.70637	0.143177	4.93355	8.07e-07	3.07e-06	SSSCA1-AS1
ENSG00000163909	56.953	-3.37396	0.2799	-12.0542	1.84e-33	2.7e-32	HEYL		ENSG00000204219	411.407	0.706934	0.0901832	7.83887	4.55e-15	3.03e-14	TCEA3
ENSG00000271447	3.52914	-3.36961	1.23556	-2.7272	0.00638738	0.0153761	MMP28		ENSG00000273478	54.7002	0.707349	0.207741	3.40496	0.000661744	0.00183888	#N/A
ENSG00000204381	77.1715	-3.36571	0.258004	-13.0452	6.77e-39	1.18e-37	LAYN		ENSG00000281005	47.3881	0.707712	0.245787	2.87937	0.00398476	0.00992885	LINC00921
ENSG00000143340	10.5688	-3.36488	0.606249	-5.55032	2.85e-08	1.22e-07	FAM163A		ENSG00000185220	411.6	0.707756	0.0862388	8.20693	2.27e-16	1.62e-15	PGBD2
ENSG00000226416	13.1295	-3.36361	0.597857	-5.62611	1.84e-08	8.01e-08	MRPL23-AS1		ENSG00000213563	3350.56	0.707872	0.0625925	11.3092	1.18e-29	1.51e-28	C8orf82
ENSG00000104313	71.2624	-3.36332	0.264759	-12.7033	5.67e-37	9.24e-36	EYA1		ENSG00000234546	40.7442	0.708587	0.248981	2.84594	0.00442799	0.0109617	LNCTAM34A
ENSG00000138759	289.434	-3.36321	0.133887	-25.1199	3.02e-139	3.95e-137	FRAS1		ENSG00000140416	2116.19	0.708592	0.0507015	13.9758	2.19e-44	4.44e-43	TPM1
ENSG00000268388	98.8482	-3.36232	0.207222	-16.2257	3.32e-59	9.95e-58	FENDRR		ENSG00000092068	1689.28	0.708838	0.102525	6.91384	4.72e-12	2.64e-11	SLC7A8
ENSG00000131016	809.811	-3.36176	0.104128	-32.2849	1.14e-228	4.75e-226	AKAP12		ENSG00000079335	801.335	0.708926	0.0707628	10.0184	1.27e-23	1.27e-22	CDC14A
ENSG00000184305	23.4717	-3.36066	0.436488	-7.69931	1.37e-14	8.86e-14	CCSER1		ENSG00000263089	32.8488	0.709282	0.298742	2.37423	0.0175857	0.0387206	AC007114.2
ENSG00000167311	23.5394	-3.35856	0.472666	-7.10557	1.2e-12	6.95e-12	ART5		ENSG00000242612	667.632	0.709701	0.078508	9.03985	1.57e-19	1.3e-18	DECR2
ENSG00000102038	359.213	-3.35802	0.115356	-29.1101	2.67e-186	6.68e-184	SMARCA1		ENSG00000132963	5194.54	0.710226	0.0714525	9.93984	2.79e-23	2.77e-22	POMP
ENSG00000165863	7.52223	-3.35789	0.738574	-4.54646	5.46e-06	1.92e-05	C10orf82		ENSG00000217128	1282.77	0.710322	0.0696543	10.1978	2.03e-24	2.11e-23	FNIP1
ENSG00000069535	12.5211	-3.35774	0.639444	-5.25103	1.51e-07	6.12e-07	MAOB		ENSG00000180353	42.664	0.710546	0.278118	2.55484	0.0106238	0.0245283	HCLS1
ENSG00000276644	199.295	-3.35595	0.168592	-19.9058	3.62e-88	2.06e-86	DACH1		ENSG00000237857	160.28	0.710663	0.16395	4.33463	1.46e-05	4.92e-05	#N/A
ENSG00000188729	14.5215	-3.35516	0.597764	-5.61284	1.99e-08	8.63e-08	OSTN		ENSG00000146830	3764.12	0.710717	0.0503207	14.1238	2.71e-45	5.66e-44	GIGYF1
ENSG00000151917	39.52	-3.35045	0.326357	-10.2662	1e-24	1.05e-23	BEND6		ENSG00000227268	103.685	0.710759	0.212534	3.34422	0.000825151	0.00226435	KLLN
ENSG00000154175	27.392	-3.34829	0.496145	-6.74862	1.49e-11	8.09e-11	ABI3BP		ENSG00000278828	616.577	0.710877	0.0834233	8.52132	1.58e-17	1.2e-16	HIST1H3H
ENSG00000166796	85.5091	-3.34753	0.239336	-13.9867	1.88e-44	3.81e-43	LDHC		ENSG00000140939	1059.26	0.710893	0.0637349	11.1539	6.85e-29	8.57e-28	NOL3
ENSG00000187984	252.376	-3.34541	0.141065	-23.7154	2.5e-124	2.63e-122	ANKRD19P		ENSG00000226287	235.133	0.711143	0.146739	4.84632	1.26e-06	4.69e-06	TMEM191A
ENSG00000272523	8.40974	-3.3425	0.733298	-4.55817	5.16e-06	1.82e-05	LINC01023		ENSG00000225969	64.7118	0.71117	0.252208	2.81978	0.00480571	0.0118286	ABHD11-AS1
ENSG00000114115	52.7333	-3.34194	0.324062	-10.3127	6.18e-25	6.55e-24	RBP1		ENSG00000092841	5770.17	0.711265	0.0735091	9.67588	3.82e-22	3.58e-21	MYL6
ENSG00000136999	2.36604	-3.33916	1.38253	-2.41525	0.0157245	0.0350395	CCN3		ENSG00000173801	7286.24	0.711566	0.0811735	8.76599	1.85e-18	1.47e-17	JUP
ENSG00000254667	12.7014	-3.33785	0.604115	-5.52519	3.29e-08	1.41e-07	#N/A		ENSG00000092929	58.1032	0.712089	0.218547	3.25828	0.0011209	0.00302311	UNC13D
ENSG00000197210	5.15957	-3.33341	0.891722	-3.73817	0.000185361	0.000551728	AP000550.1		ENSG00000197635	626.668	0.712722	0.113198	6.29625	3.05e-10	1.51e-09	DPP4
ENSG00000148516	194.601	-3.33217	0.16138	-20.648	1.02e-94	6.47e-93	ZEB1		ENSG00000100994	9542.72	0.713026	0.0623128	11.4427	2.56e-30	3.37e-29	PYGB
ENSG00000166033	189.034	-3.33167	0.162748	-20.4714	3.87e-93	2.43e-91	HTRA1		ENSG00000231856	104.532	0.713067	0.160345	4.44707	8.7e-06	2.99e-05	AL162377.1
ENSG00000146373	212.497	-3.32912	0.148713	-22.3863	5.36e-111	4.46e-109	RNF217		ENSG00000111670	3524.44	0.713124	0.0401314	17.7697	1.21e-70	4.78e-69	GNPTAB
ENSG00000100427	28.2424	-3.32904	0.402047	-8.28023	1.23e-16	8.88e-16	MLC1		ENSG00000099377	295.459	0.713347	0.111053	6.4235	1.33e-10	6.76e-10	HSD3B7
ENSG00000260123	12.5308	-3.32612	0.619623	-5.36798	7.96e-08	3.29e-07	AC013565.1		ENSG00000161513	1174.89	0.713763	0.0542515	13.1566	1.56e-39	2.76e-38	FDXR
ENSG00000186684	25.7546	-3.32568	0.415907	-7.99621	1.28e-15	8.79e-15	CYP27C1		ENSG00000007516	584.509	0.713847	0.111181	6.42061	1.36e-10	6.89e-10	BAIAP3
ENSG00000115232	21.8511	-3.3243	0.494642	-6.72061	1.81e-11	9.77e-11	ITGA4		ENSG00000087510	761.508	0.713973	0.0720572	9.90842	3.83e-23	3.77e-22	TFAP2C
ENSG00000116729	833.435	-3.32278	0.0716729	-46.3603	0	0	WLS		ENSG00000279794	34.9608	0.714003	0.284077	2.51341	0.011957	0.0273355	AC024580.1
ENSG00000162669	22.2089	-3.32226	0.418927	-7.93041	2.18e-15	1.48e-14	HFM1		ENSG00000189221	10109.5	0.714058	0.0454509	15.7106	1.28e-55	3.57e-54	MAOA
ENSG00000138829	435.443	-3.32088	0.107234	-30.9685	1.43e-210	4.69e-208	FBN2		ENSG00000198369	533.203	0.714224	0.0915981	7.79737	6.32e-15	4.17e-14	SPRED2
ENSG00000144712	171.675	-3.31949	0.165155	-20.0992	7.5e-90	4.39e-88	CAND2		ENSG00000058799	939.8	0.714494	0.0735487	9.71456	2.61e-22	2.47e-21	YIPF1
ENSG00000168143	5.65825	-3.31566	0.91343	-3.6299	0.000283536	0.000825707	FAM83B		ENSG00000212694	227.773	0.714569	0.12251	5.83275	5.45e-09	2.47e-08	LINC01089
ENSG00000152495	59.9573	-3.3144	0.294352	-11.26	2.07e-29	2.62e-28	CAMK4		ENSG00000104140	830.21	0.71495	0.0892711	8.00875	1.16e-15	7.96e-15	RHOV
ENSG00000169515	231.777	-3.31144	0.144515	-22.9142	3.35e-116	3.12e-114	CCDC8		ENSG00000247092	349.81	0.715516	0.101983	7.01601	2.28e-12	1.31e-11	SNHG10
ENSG00000149131	8.99442	-3.30741	0.697402	-4.74247	2.11e-06	7.7e-06	SERPING1		ENSG00000090674	440.08	0.71558	0.0861197	8.30914	9.64e-17	7e-16	MCOLN1
ENSG00000167552	373.409	-3.30733	0.11549	-28.6375	2.29e-180	5.39e-178	TUBA1A		ENSG00000179627	1519.38	0.716485	0.0629778	11.3768	5.46e-30	7.08e-29	ZBTB42
ENSG00000256463	85.0293	-3.30729	0.232718	-14.2116	7.76e-46	1.66e-44	SALL3		ENSG00000109814	2845.87	0.716605	0.0528139	13.5685	6.16e-42	1.17e-40	UGDH
ENSG00000178081	15.4172	-3.30687	0.51898	-6.37186	1.87e-10	9.39e-10	ULK4P3		ENSG00000226007	36.9162	0.716985	0.263269	2.72339	0.00646159	0.0155398	BX005266.2
ENSG00000164438	15.2053	-3.30671	0.640433	-5.16324	2.43e-07	9.68e-07	TLX3		ENSG00000123407	494.995	0.717035	0.0993993	7.21369	5.45e-13	3.23e-12	HOXC12
ENSG00000188452	11.5508	-3.30646	0.608281	-5.43574	5.46e-08	2.29e-07	CERKL		ENSG00000179477	47.7501	0.717201	0.243741	2.94247	0.00325601	0.00820224	ALOX12B
ENSG00000206384	3.20626	-3.30612	1.17415	-2.81574	0.00486643	0.0119577	COL6A6		ENSG00000256683	182.6	0.717722	0.122327	5.86725	4.43e-09	2.02e-08	ZNF350
ENSG00000256596	3.15595	-3.30498	1.22022	-2.70852	0.00675843	0.0161829	AC026358.1		ENSG00000272196	113.467	0.717726	0.21583	3.32543	0.000882833	0.00241252	HIST2H2AA4
ENSG00000197977	172.401	-3.30365	0.152619	-21.6464	6.58e-104	4.95e-102	ELOVL2		ENSG00000175198	1236.67	0.718089	0.061371	11.7008	1.26e-31	1.74e-30	PCCA
ENSG00000022267	1016.03	-3.30301	0.0671824	-49.1648	0	0	FHL1		ENSG00000198673	50.8371	0.718172	0.221521	3.24201	0.0011869	0.00319141	TAFA2
ENSG00000108018	75.7114	-3.30263	0.254945	-12.9543	2.22e-38	3.81e-37	SORCS1		ENSG00000273812	61.8807	0.718465	0.203137	3.53685	0.000404927	0.0011574	BX640514.2
ENSG00000059804	77.6292	-3.3022	0.377101	-8.75681	2.01e-18	1.59e-17	SLC2A3		ENSG00000198832	2191.6	0.718655	0.0545658	13.1704	1.3e-39	2.31e-38	SELENOM
ENSG00000205359	7.24638	-3.29859	0.831867	-3.96529	7.33e-05	0.000229586	SLCO6A1		ENSG00000169926	2601.95	0.719006	0.0547515	13.1322	2.15e-39	3.79e-38	KLF13
ENSG00000189212	14.0368	-3.29565	0.611865	-5.38624	7.19e-08	2.99e-07	DPY19L2P1		ENSG00000145860	2564.49	0.719089	0.0491719	14.624	1.97e-48	4.57e-47	RNF145
ENSG00000188185	43.1031	-3.29529	0.349461	-9.42963	4.12e-21	3.67e-20	LINC00265		ENSG00000169871	3865.45	0.719163	0.0401619	17.9066	1.05e-71	4.24e-70	TRIM56
ENSG00000183463	2.84551	-3.29474	1.285	-2.56399	0.0103475	0.0239347	URAD		ENSG00000180190	837.303	0.71918	0.0734625	9.78976	1.25e-22	1.2e-21	TDRP
ENSG00000250208	82.5607	-3.29403	0.223558	-14.7346	3.87e-49	9.12e-48	FZD10-AS1		ENSG00000184903	822.829	0.719697	0.0818564	8.79219	1.47e-18	1.17e-17	IMMP2L
ENSG00000177272	15.2629	-3.29288	0.504414	-6.52812	6.66e-11	3.46e-10	KCNA3		ENSG00000128000	792.822	0.719814	0.0569021	12.6501	1.12e-36	1.8e-35	ZNF780B
ENSG00000134138	121.992	-3.2907	0.259805	-12.666	9.12e-37	1.47e-35	MEIS2		ENSG00000277459	40.9831	0.719886	0.278034	2.5892	0.00961983	0.0223852	AP001527.2
ENSG00000162687	4.77669	-3.2905	0.973197	-3.38112	0.000721907	0.00199677	KCNT2		ENSG00000258655	51.9478	0.720275	0.272505	2.64316	0.00821353	0.0193735	ARHGAP5-AS1
ENSG00000112246	49.4427	-3.2901	0.29481	-11.1601	6.4e-29	8.01e-28	SIM1		ENSG00000151327	2811.02	0.720492	0.0570361	12.6322	1.4e-36	2.25e-35	FAM177A1
ENSG00000138769	40.6085	-3.28942	0.334233	-9.84171	7.44e-23	7.25e-22	CDKL2		ENSG00000174721	170.639	0.720853	0.126875	5.68159	1.33e-08	5.86e-08	FGFBP3
ENSG00000255441	3.52856	-3.28674	1.20514	-2.72728	0.00638595	0.015374	AC008750.2		ENSG00000078804	1689.91	0.721109	0.095523	7.54906	4.38e-14	2.77e-13	TP53INP2
ENSG00000157510	120.482	-3.2849	0.232182	-14.1479	1.92e-45	4.04e-44	AFAP1L1		ENSG00000110711	1334.42	0.721186	0.0763559	9.44505	3.55e-21	3.18e-20	AIP
ENSG00000145246	45.1379	-3.28355	0.305478	-10.7489	6e-27	6.95e-26	ATP10D		ENSG00000167306	1004.39	0.721234	0.062409	11.5566	6.84e-31	9.17e-30	MYO5B
ENSG00000249395	49.7428	-3.27974	0.302134	-10.8553	1.88e-27	2.23e-26	CASC9		ENSG00000126603	623.7	0.721384	0.105297	6.85092	7.34e-12	4.07e-11	GLIS2
ENSG00000260947	31.0034	-3.27948	0.370381	-8.85433	8.42e-19	6.77e-18	AL356489.2		ENSG00000279833	40.7977	0.721913	0.28837	2.50343	0.0122996	0.0280539	AL031846.2
ENSG00000135116	234.164	-3.27872	0.169916	-19.2961	5.79e-83	2.99e-81	HRK		ENSG00000198948	616.636	0.722498	0.0725515	9.95842	2.32e-23	2.3e-22	MFAP3L
ENSG00000117020	440.427	-3.27833	0.103541	-31.6621	5.17e-220	1.92e-217	AKT3		ENSG00000157593	2387.48	0.72259	0.0478546	15.0997	1.63e-51	4.1e-50	SLC35B2
ENSG00000138378	8.07922	-3.27832	0.74841	-4.38038	1.18e-05	4.02e-05	STAT4		ENSG00000187796	176.19	0.722807	0.133133	5.42921	5.66e-08	2.37e-07	CARD9
ENSG00000118495	633.116	-3.27753	0.0975382	-33.6026	1.54e-247	7.98e-245	PLAGL1		ENSG00000092295	245.977	0.723007	0.134223	5.38663	7.18e-08	2.98e-07	TGM1
ENSG00000179598	129.764	-3.27554	0.213944	-15.3103	6.53e-53	1.71e-51	PLD6		ENSG00000105856	1447.97	0.723028	0.0604509	11.9606	5.72e-33	8.23e-32	HBP1
ENSG00000056487	179.456	-3.27305	0.151897	-21.5478	5.55e-103	4.14e-101	PHF21B		ENSG00000032444	2038.65	0.723601	0.0657429	11.0065	3.55e-28	4.31e-27	PNPLA6
ENSG00000123201	50.1756	-3.27242	0.278132	-11.7657	5.86e-32	8.19e-31	GUCY1B2		ENSG00000176485	1612.22	0.723633	0.0556232	13.0095	1.08e-38	1.87e-37	PLAAT3
ENSG00000229544	14.235	-3.27233	0.509493	-6.42271	1.34e-10	6.8e-10	NKX1-2		ENSG00000119632	126.029	0.723665	0.203429	3.55734	0.000374636	0.00107551	IFI27L2
ENSG00000100473	201.436	-3.27165	0.15412	-21.2279	5.27e-100	3.72e-98	COCH		ENSG00000119725	56.4825	0.723695	0.233876	3.09436	0.00197241	0.00513139	ZNF410
ENSG00000234969	4.33437	-3.27109	0.988704	-3.30847	0.000938088	0.0025564	AL627389.1		ENSG00000185864	226.972	0.723908	0.131918	5.48758	4.07e-08	1.73e-07	NPIPB4
ENSG00000230707	23.6811	-3.26685	0.447066	-7.30732	2.73e-13	1.64e-12	AL589987.1		ENSG00000248593	145.307	0.724194	0.155341	4.66197	3.13e-06	1.13e-05	DSTNP2
ENSG00000038427	216.212	-3.26545	0.173183	-18.8554	2.65e-79	1.27e-77	VCAN		ENSG00000150403	3333.26	0.724395	0.0530079	13.6658	1.63e-42	3.14e-41	TMCO3
ENSG00000147872	300.281	-3.26224	0.123649	-26.383	2.15e-153	3.56e-151	PLIN2		ENSG00000176973	126.128	0.724397	0.196425	3.68791	0.0002261	0.000665852	FAM89B
ENSG00000242715	7.63946	-3.26017	0.98965	-3.29427	0.000986788	0.00268008	CCDC169		ENSG00000078902	2923.79	0.724599	0.0408198	17.7512	1.69e-70	6.64e-69	TOLLIP
ENSG00000164616	40.4969	-3.2589	0.322368	-10.1093	5.03e-24	5.13e-23	FBXL21P		ENSG00000131669	2758.59	0.725026	0.0636113	11.3978	4.29e-30	5.6e-29	NINJ1
ENSG00000165259	37.3986	-3.25865	0.351795	-9.26292	1.99e-20	1.72e-19	HDX		ENSG00000008441	17394.6	0.725309	0.0660622	10.9792	4.81e-28	5.81e-27	NFIX
ENSG00000130830	324.248	-3.25819	0.12784	-25.4865	2.78e-143	3.94e-141	MPP1		ENSG00000087842	1077.94	0.725353	0.0592534	12.2415	1.86e-34	2.8e-33	PIR
ENSG00000133069	104.892	-3.25375	0.214669	-15.1571	6.81e-52	1.74e-50	TMCC2		ENSG00000163683	3042.75	0.7256	0.0540496	13.4247	4.33e-41	8.1e-40	SMIM14
ENSG00000172201	1123.62	-3.25006	0.151021	-21.5206	9.99e-103	7.42e-101	ID4		ENSG00000171222	2217.4	0.725679	0.0788002	9.2091	3.29e-20	2.81e-19	SCAND1
ENSG00000149557	107.973	-3.24827	0.221048	-14.6948	6.96e-49	1.63e-47	FEZ1		ENSG00000159423	615.653	0.725822	0.0993815	7.30339	2.81e-13	1.69e-12	ALDH4A1
ENSG00000007171	27.3806	-3.2447	0.411749	-7.88028	3.27e-15	2.19e-14	NOS2		ENSG00000082701	4183.14	0.725889	0.0410692	17.6748	6.56e-70	2.52e-68	GSK3B
ENSG00000175445	25.1702	-3.24115	0.413949	-7.82982	4.89e-15	3.24e-14	LPL		ENSG00000197712	1808.81	0.726161	0.0571204	12.7128	5.02e-37	8.2e-36	FAM114A1
ENSG00000118922	430.863	-3.23876	0.104286	-31.0567	9.27e-212	3.11e-209	KLF12		ENSG00000171608	1847.39	0.726205	0.0693627	10.4697	1.19e-25	1.3e-24	PIK3CD
ENSG00000148798	394.141	-3.23726	0.119076	-27.1866	9.35e-163	1.7e-160	INA		ENSG00000215440	423.68	0.72634	0.0904622	8.02921	9.81e-16	6.77e-15	NPEPL1
ENSG00000106829	764.079	-3.23696	0.0978777	-33.0714	7.65e-240	3.63e-237	TLE4		ENSG00000224023	39.682	0.726361	0.308918	2.35131	0.0187075	0.0408846	EDRF1-DT
ENSG00000069509	152.213	-3.2358	0.183845	-17.6007	2.43e-69	9.24e-68	FUNDC1		ENSG00000166971	1421.06	0.726612	0.0600552	12.0991	1.07e-33	1.57e-32	AKTIP
ENSG00000165566	5.07984	-3.23558	0.908161	-3.56278	0.000366947	0.00105487	AMER2		ENSG00000188833	53.5385	0.726679	0.224524	3.23653	0.00120994	0.00324893	ENTPD8
ENSG00000237380	61.1353	-3.23464	0.259453	-12.4672	1.13e-35	1.77e-34	HOXD-AS2		ENSG00000116663	166.03	0.727115	0.139847	5.19936	2e-07	8.02e-07	FBXO6
ENSG00000133878	7.30534	-3.2344	0.857617	-3.77139	0.000162343	0.000487064	DUSP26		ENSG00000166575	2069.09	0.727191	0.0488563	14.8843	4.17e-50	1.01e-48	TMEM135
ENSG00000185818	617.775	-3.23274	0.0883996	-36.5697	8.68e-293	8.53e-290	NAT8L		ENSG00000133313	7103.88	0.727231	0.0403798	18.0098	1.63e-72	6.74e-71	CNDP2
ENSG00000230461	10.3587	-3.2323	0.672218	-4.80841	1.52e-06	5.63e-06	PROX1-AS1		ENSG00000162105	619.249	0.7274	0.0939093	7.74577	9.5e-15	6.21e-14	SHANK2
ENSG00000144354	1129.15	-3.23175	0.0701151	-46.0921	0	0	CDCA7		ENSG00000176834	1825.81	0.727478	0.0559257	13.0079	1.1e-38	1.91e-37	VSIG10
ENSG00000127920	24.5972	-3.23028	0.433267	-7.45563	8.94e-14	5.56e-13	GNG11		ENSG00000237330	74.2316	0.727849	0.205466	3.54243	0.000396454	0.00113418	RNF223
ENSG00000139973	41.2416	-3.22512	0.405255	-7.95825	1.74e-15	1.19e-14	SYT16		ENSG00000184731	168.647	0.728083	0.20294	3.58767	0.000333645	0.000964076	FAM110C
ENSG00000259511	4.55695	-3.225	1.07384	-3.00326	0.00267108	0.00681428	UBE2Q2L		ENSG00000177989	600.442	0.728475	0.0864607	8.4255	3.59e-17	2.67e-16	ODF3B
ENSG00000109113	289.986	-3.22465	0.120256	-26.8149	2.16e-158	3.81e-156	RAB34		ENSG00000174562	285.233	0.728751	0.125266	5.81762	5.97e-09	2.69e-08	KLK15
ENSG00000163219	8.53115	-3.2231	0.670189	-4.80924	1.52e-06	5.61e-06	ARHGAP25		ENSG00000235027	46.0145	0.728815	0.252442	2.88706	0.0038886	0.00970598	AC068580.3
ENSG00000179528	45.0148	-3.22249	0.310652	-10.3733	3.28e-25	3.51e-24	LBX2		ENSG00000152086	304.434	0.729014	0.139099	5.24095	1.6e-07	6.45e-07	TUBA3E
ENSG00000206557	54.9668	-3.221	0.279462	-11.5257	9.79e-31	1.31e-29	TRIM71		ENSG00000277363	647.805	0.729188	0.0786457	9.2718	1.83e-20	1.58e-19	SRCIN1
ENSG00000213468	98.4329	-3.22036	0.202902	-15.8715	9.98e-57	2.85e-55	FIRRE		ENSG00000092096	632.332	0.729298	0.104776	6.96055	3.39e-12	1.92e-11	SLC22A17
ENSG00000150630	14.8345	-3.21909	0.534513	-6.02247	1.72e-09	8.04e-09	VEGFC		ENSG00000176058	1876.98	0.729655	0.0730308	9.99106	1.67e-23	1.67e-22	TPRN
ENSG00000115306	1080.96	-3.21871	0.0740091	-43.4907	0	0	SPTBN1		ENSG00000170561	72.4124	0.730072	0.223372	3.26841	0.00108152	0.00292121	IRX2
ENSG00000107562	64.6375	-3.21717	0.246354	-13.0591	5.64e-39	9.84e-38	CXCL12		ENSG00000219481	2171.29	0.730182	0.0486917	14.996	7.79e-51	1.92e-49	NBPF1
ENSG00000184029	9.44251	-3.21234	0.683674	-4.69864	2.62e-06	9.49e-06	DSCR4		ENSG00000205808	1110.37	0.731159	0.0684561	10.6807	1.25e-26	1.43e-25	PLPP6
ENSG00000129951	79.4453	-3.21105	0.236363	-13.5852	4.9e-42	9.35e-41	PLPPR3		ENSG00000184470	2894.11	0.73116	0.0441934	16.5446	1.75e-61	5.56e-60	TXNRD2
ENSG00000147889	1711.01	-3.20905	0.153939	-20.8463	1.65e-96	1.09e-94	CDKN2A		ENSG00000220785	69.7413	0.731212	0.198786	3.6784	0.000234706	0.000690159	MTMR9LP
ENSG00000202474	7.90463	-3.20723	0.752603	-4.26152	2.03e-05	6.74e-05	RNA5SP283		ENSG00000166387	1072.77	0.731484	0.0705945	10.3618	3.7e-25	3.96e-24	PPFIBP2
ENSG00000162745	9.50459	-3.20723	0.734018	-4.36942	1.25e-05	4.22e-05	OLFML2B		ENSG00000008282	3850.42	0.731811	0.0469483	15.5876	8.84e-55	2.41e-53	SYPL1
ENSG00000159217	1293.55	-3.2072	0.0926078	-34.6321	8.32e-263	5.2e-260	IGF2BP1		ENSG00000104067	9636.48	0.732268	0.0491951	14.885	4.13e-50	9.97e-49	TJP1
ENSG00000172164	160.339	-3.20453	0.165257	-19.3913	9.15e-84	4.82e-82	SNTB1		ENSG00000183283	4312.64	0.733331	0.0474157	15.466	5.88e-54	1.58e-52	DAZAP2
ENSG00000143869	233.48	-3.20394	0.143982	-22.2524	1.07e-109	8.75e-108	GDF7		ENSG00000169169	867.571	0.733404	0.0691981	10.5986	3.02e-26	3.4e-25	CPT1C
ENSG00000164694	19.525	-3.2026	0.463553	-6.90882	4.89e-12	2.73e-11	FNDC1		ENSG00000166347	3408.18	0.73363	0.0565084	12.9827	1.53e-38	2.64e-37	CYB5A
ENSG00000244588	2.64155	-3.20142	1.3263	-2.41379	0.0157874	0.0351682	RAD21L1		ENSG00000135454	603.01	0.733673	0.0863306	8.49841	1.92e-17	1.45e-16	B4GALNT1
ENSG00000224905	25.3343	-3.1967	0.442115	-7.23047	4.81e-13	2.86e-12	AP001347.1		ENSG00000242802	974.595	0.733725	0.065245	11.2457	2.43e-29	3.08e-28	AP5Z1
ENSG00000198795	81.6504	-3.19444	0.255612	-12.4973	7.73e-36	1.22e-34	ZNF521		ENSG00000123870	67.3196	0.733833	0.214639	3.41892	0.000628709	0.0017515	ZNF137P
ENSG00000232139	2.12462	-3.19403	1.39885	-2.28333	0.0224108	0.0481702	LINC00867		ENSG00000258056	495.036	0.734	0.10363	7.08286	1.41e-12	8.17e-12	AC009779.2
ENSG00000006468	5.61151	-3.19336	0.950146	-3.36092	0.000776834	0.00213991	ETV1		ENSG00000125652	1540.95	0.734195	0.0704477	10.4218	1.97e-25	2.13e-24	ALKBH7
ENSG00000196557	608.866	-3.19331	0.108919	-29.3181	6.09e-189	1.59e-186	CACNA1H		ENSG00000177565	7899.23	0.734634	0.0403465	18.2081	4.45e-74	1.89e-72	TBL1XR1
ENSG00000171873	3.46272	-3.19309	1.1282	-2.83025	0.00465111	0.0114758	ADRA1D		ENSG00000156453	1281.35	0.734685	0.0795538	9.23507	2.58e-20	2.22e-19	PCDH1
ENSG00000128040	3.93528	-3.19263	1.02575	-3.11248	0.0018552	0.00484298	SPINK2		ENSG00000144452	72.2261	0.734721	0.196904	3.73137	0.00019044	0.000565988	ABCA12
ENSG00000128394	24.0892	-3.1905	0.453623	-7.03338	2.02e-12	1.16e-11	APOBEC3F		ENSG00000279716	46.3513	0.734829	0.296749	2.47626	0.0132765	0.0300647	AC006128.1
ENSG00000133124	1670.69	-3.18641	0.0906729	-35.1418	1.55e-270	1.06e-267	IRS4		ENSG00000168491	118.197	0.73488	0.162292	4.52814	5.95e-06	2.08e-05	CCDC110
ENSG00000267372	5.7667	-3.18552	0.853163	-3.73377	0.000188631	0.000560951	AC005330.1		ENSG00000225377	302.266	0.7352	0.11817	6.22153	4.92e-10	2.4e-09	NRSN2-AS1
ENSG00000168079	3.31394	-3.18491	1.11667	-2.85214	0.00434259	0.010761	SCARA5		ENSG00000163874	274.216	0.735415	0.112656	6.52797	6.67e-11	3.46e-10	ZC3H12A
ENSG00000116962	990.292	-3.18466	0.0860747	-36.9988	1.2e-299	1.27e-296	NID1		ENSG00000231439	180.486	0.735637	0.138693	5.30407	1.13e-07	4.63e-07	WASIR2
ENSG00000116039	19.7192	-3.1832	0.46321	-6.87206	6.33e-12	3.52e-11	ATP6V1B1		ENSG00000135926	3338.21	0.735744	0.0530615	13.8659	1.02e-43	2.03e-42	TMBIM1
ENSG00000186314	27.5974	-3.18279	0.400696	-7.94315	1.97e-15	1.34e-14	PRELID2		ENSG00000120899	1179.97	0.735753	0.0624074	11.7895	4.42e-32	6.19e-31	PTK2B
ENSG00000131773	552.406	-3.18181	0.116333	-27.3508	1.06e-164	1.96e-162	KHDRBS3		ENSG00000185686	2703.19	0.73646	0.068735	10.7145	8.7e-27	1e-25	PRAME
ENSG00000183145	37.7712	-3.18156	0.344227	-9.24261	2.41e-20	2.07e-19	RIPPLY3		ENSG00000176720	1051.43	0.736622	0.0954769	7.71519	1.21e-14	7.85e-14	BOK
ENSG00000115844	623.694	-3.18103	0.0980661	-32.4376	8.1e-231	3.59e-228	DLX2		ENSG00000172725	4872.79	0.737165	0.0441672	16.6903	1.54e-62	5.01e-61	CORO1B
ENSG00000164120	242.772	-3.17928	0.356393	-8.92071	4.63e-19	3.77e-18	HPGD		ENSG00000203999	345.769	0.737585	0.109974	6.7069	1.99e-11	1.07e-10	LINC01270
ENSG00000228630	95.5624	-3.17804	0.199635	-15.9192	4.66e-57	1.34e-55	HOTAIR		ENSG00000273117	370.46	0.73799	0.100378	7.35207	1.95e-13	1.18e-12	AC144652.1
ENSG00000151967	4.25876	-3.17774	1.24085	-2.56093	0.0104391	0.0241284	SCHIP1		ENSG00000139547	37.9462	0.738027	0.299142	2.46715	0.0136193	0.0307624	RDH16
ENSG00000266306	8.79505	-3.1763	0.679527	-4.67428	2.95e-06	1.06e-05	AC061975.5		ENSG00000182957	1575.02	0.738287	0.0484303	15.2443	1.8e-52	4.67e-51	SPATA13
ENSG00000177108	25.6653	-3.17186	0.447123	-7.09394	1.3e-12	7.55e-12	ZDHHC22		ENSG00000122042	3181.28	0.738329	0.0480329	15.3713	2.55e-53	6.74e-52	UBL3
ENSG00000153250	365.17	-3.17147	0.131348	-24.1455	8.32e-129	9.19e-127	RBMS1		ENSG00000128609	4110.61	0.738426	0.0573387	12.8783	5.96e-38	1.01e-36	NDUFA5
ENSG00000241697	33.6861	-3.17124	0.376934	-8.41325	3.99e-17	2.95e-16	TMEFF1		ENSG00000167562	185.418	0.73852	0.128158	5.76255	8.29e-09	3.69e-08	ZNF701
ENSG00000164093	107.279	-3.17098	0.227337	-13.9483	3.22e-44	6.48e-43	PITX2		ENSG00000198964	987.335	0.73853	0.0673879	10.9594	5.99e-28	7.2e-27	SGMS1
ENSG00000054598	1114.37	-3.17087	0.0940918	-33.6998	5.83e-249	3.08e-246	FOXC1		ENSG00000095066	2338.07	0.738549	0.0557971	13.2363	5.41e-40	9.72e-39	HOOK2
ENSG00000055732	163.685	-3.16816	0.157369	-20.1321	3.86e-90	2.29e-88	MCOLN3		ENSG00000185896	3604.74	0.738736	0.0653352	11.3069	1.21e-29	1.55e-28	LAMP1
ENSG00000163623	83.0581	-3.16776	0.256976	-12.3271	6.48e-35	9.94e-34	NKX6-1		ENSG00000186891	405.599	0.739331	0.0843003	8.77021	1.78e-18	1.41e-17	TNFRSF18
ENSG00000166025	706.003	-3.16768	0.0886347	-35.7386	9.96e-280	8.29e-277	AMOTL1		ENSG00000112796	225.1	0.739375	0.127623	5.79341	6.9e-09	3.1e-08	ENPP5
ENSG00000076706	192.377	-3.16723	0.144872	-21.8622	5.95e-106	4.65e-104	MCAM		ENSG00000167703	1568.39	0.739855	0.0573861	12.8926	4.96e-38	8.38e-37	SLC43A2
ENSG00000165621	2.45607	-3.16716	1.358	-2.33223	0.0196886	0.042838	OXGR1		ENSG00000140853	94.5961	0.739898	0.163639	4.52152	6.14e-06	2.15e-05	NLRC5
ENSG00000130224	343.287	-3.16632	0.12998	-24.36	4.55e-131	5.25e-129	LRCH2		ENSG00000171223	828.527	0.740468	0.084677	8.74462	2.24e-18	1.76e-17	JUNB
ENSG00000132563	273.484	-3.16301	0.148832	-21.2522	3.15e-100	2.24e-98	REEP2		ENSG00000225556	55.4298	0.740786	0.23439	3.16048	0.0015751	0.00415835	C2CD4D
ENSG00000100626	184.383	-3.16279	0.168683	-18.7499	1.94e-78	9.07e-77	GALNT16		ENSG00000173442	859.282	0.741193	0.0764401	9.69638	3.12e-22	2.94e-21	EHBP1L1
ENSG00000011028	175.485	-3.16275	0.157555	-20.074	1.25e-89	7.26e-88	MRC2		ENSG00000180921	5112.9	0.741391	0.0612472	12.1049	9.95e-34	1.47e-32	FAM83H
ENSG00000250979	4.52759	-3.16105	1.02025	-3.0983	0.00194637	0.00506799	AC022905.1		ENSG00000262877	89.3799	0.741469	0.181479	4.08571	4.39e-05	0.000141305	AC110285.2
ENSG00000231672	11.1821	-3.16026	0.614348	-5.14409	2.69e-07	1.07e-06	DIRC3		ENSG00000008283	12769.3	0.741553	0.0316487	23.4307	2.08e-121	2.09e-119	CYB561
ENSG00000180447	189.285	-3.159	0.147774	-21.3772	2.18e-101	1.58e-99	GAS1		ENSG00000182327	138.547	0.741772	0.151193	4.90612	9.29e-07	3.51e-06	GLTPD2
ENSG00000085662	818.752	-3.15549	0.0861231	-36.6393	6.77e-294	6.9e-291	AKR1B1		ENSG00000139517	2477.34	0.742071	0.041914	17.7046	3.86e-70	1.5e-68	LNX2
ENSG00000068615	79.6824	-3.155	0.237471	-13.2858	2.8e-40	5.08e-39	REEP1		ENSG00000143450	104.624	0.7425	0.161052	4.61032	4.02e-06	1.43e-05	OAZ3
ENSG00000115363	11.3122	-3.15474	0.591029	-5.33771	9.41e-08	3.87e-07	EVA1A		ENSG00000169213	2903.07	0.742639	0.0620234	11.9735	4.89e-33	7.06e-32	RAB3B
ENSG00000105137	255.244	-3.15449	0.127512	-24.7388	4.1e-135	5.03e-133	SYDE1		ENSG00000241764	156.479	0.743903	0.141204	5.26829	1.38e-07	5.6e-07	AC002467.1
ENSG00000139187	21.5423	-3.15423	0.448251	-7.03674	1.97e-12	1.13e-11	KLRG1		ENSG00000272768	28.9547	0.74394	0.325457	2.28583	0.0222641	0.0478921	AC004854.2
ENSG00000225434	14.2894	-3.15172	0.553135	-5.69793	1.21e-08	5.34e-08	LINC01504		ENSG00000138166	65.7735	0.744096	0.227249	3.27437	0.00105898	0.00286427	DUSP5
ENSG00000132321	2.46542	-3.15114	1.26267	-2.49561	0.0125742	0.0286417	IQCA1		ENSG00000099889	1722.13	0.744129	0.0517193	14.3878	6.17e-47	1.36e-45	ARVCF
ENSG00000071967	55.3506	-3.15062	0.277593	-11.3498	7.44e-30	9.58e-29	CYBRD1		ENSG00000110092	4526.22	0.744193	0.0663839	11.2104	3.62e-29	4.57e-28	CCND1
ENSG00000244509	129.417	-3.15053	0.175785	-17.9226	7.85e-72	3.19e-70	APOBEC3C		ENSG00000075223	996.626	0.744384	0.0804936	9.24774	2.29e-20	1.97e-19	SEMA3C
ENSG00000169126	122.177	-3.15005	0.194361	-16.2072	4.49e-59	1.34e-57	ARMC4		ENSG00000213967	89.8343	0.74441	0.199361	3.73399	0.000188474	0.000560673	ZNF726
ENSG00000124006	631.101	-3.14949	0.203684	-15.4626	6.2e-54	1.66e-52	OBSL1		ENSG00000141526	4409.69	0.744561	0.0546314	13.6288	2.7e-42	5.2e-41	SLC16A3
ENSG00000151702	39.778	-3.14884	0.316165	-9.95947	2.29e-23	2.28e-22	FLI1		ENSG00000159184	6874.4	0.744717	0.0531981	13.9989	1.58e-44	3.22e-43	HOXB13
ENSG00000182389	80.9066	-3.14805	0.234762	-13.4095	5.32e-41	9.92e-40	CACNB4		ENSG00000149489	119.042	0.744743	0.175211	4.25055	2.13e-05	7.06e-05	ROM1
ENSG00000198914	113.716	-3.14594	0.189301	-16.6187	5.1e-62	1.64e-60	POU3F3		ENSG00000184602	1451.03	0.744878	0.064498	11.5489	7.48e-31	1e-29	SNN
ENSG00000164683	1408.76	-3.14496	0.0643135	-48.9004	0	0	HEY1		ENSG00000181444	2092.6	0.745697	0.0718798	10.3742	3.25e-25	3.48e-24	ZNF467
ENSG00000164946	4.29782	-3.14466	0.985269	-3.19168	0.00141449	0.00376472	FREM1		ENSG00000254109	45.7673	0.745997	0.24136	3.09081	0.00199615	0.00518824	RBPMS-AS1
ENSG00000203867	310.823	-3.14455	0.121113	-25.9638	1.27e-148	1.96e-146	RBM20		ENSG00000174950	49.6389	0.746098	0.251653	2.96478	0.00302897	0.00766613	CD164L2
ENSG00000283122	4.40106	-3.14453	0.960801	-3.27282	0.00106479	0.00287942	HYMAI		ENSG00000156869	522.4	0.746357	0.0889606	8.38975	4.87e-17	3.6e-16	FRRS1
ENSG00000171540	3.3021	-3.14439	1.148	-2.73901	0.00616237	0.0148649	OTP		ENSG00000229891	82.7627	0.746438	0.204146	3.65639	0.000255787	0.000748946	LINC01315
ENSG00000110427	91.757	-3.14049	0.235277	-13.348	1.22e-40	2.24e-39	KIAA1549L		ENSG00000203499	1812.65	0.746602	0.0712792	10.4743	1.13e-25	1.24e-24	IQANK1
ENSG00000091428	58.9604	-3.13873	0.264099	-11.8846	1.42e-32	2.02e-31	RAPGEF4		ENSG00000115993	3219.34	0.74665	0.0456695	16.349	4.42e-60	1.36e-58	TRAK2
ENSG00000114405	162.383	-3.13821	0.18956	-16.5552	1.47e-61	4.67e-60	C3orf14		ENSG00000162576	2824.06	0.74665	0.0544548	13.7114	8.68e-43	1.69e-41	MXRA8
ENSG00000085276	148.849	-3.13635	0.178971	-17.5244	9.34e-69	3.51e-67	MECOM		ENSG00000168273	537.493	0.746667	0.120691	6.18661	6.15e-10	2.97e-09	SMIM4
ENSG00000280322	316.591	-3.13604	0.153383	-20.4458	6.55e-93	4.06e-91	AL035425.4		ENSG00000114923	405.485	0.747432	0.0887851	8.41844	3.82e-17	2.83e-16	SLC4A3
ENSG00000117069	4.5296	-3.13567	0.935851	-3.35061	0.000806332	0.00221536	ST6GALNAC5		ENSG00000165389	1658.39	0.747525	0.0654807	11.416	3.48e-30	4.56e-29	SPTSSA
ENSG00000259425	6.86838	-3.13331	0.849796	-3.68713	0.000226797	0.000667761	AC011767.1		ENSG00000270964	128.399	0.747531	0.15196	4.91926	8.69e-07	3.29e-06	AC016355.1
ENSG00000163364	6.7647	-3.13309	0.732845	-4.27524	1.91e-05	6.36e-05	LINC01116		ENSG00000230069	49.5095	0.747642	0.286195	2.61235	0.00899226	0.0210406	LRRC37A15P
ENSG00000198796	10.3541	-3.13205	0.659878	-4.7464	2.07e-06	7.56e-06	ALPK2		ENSG00000240859	132.52	0.74812	0.142824	5.23806	1.62e-07	6.55e-07	AC093627.4
ENSG00000271776	6.51164	-3.13111	0.789111	-3.96789	7.25e-05	0.000227225	AL445209.1		ENSG00000172830	1454.62	0.748613	0.0646393	11.5814	5.12e-31	6.89e-30	SSH3
ENSG00000121966	15.3136	-3.13108	0.632084	-4.95358	7.29e-07	2.78e-06	CXCR4		ENSG00000247934	94.4162	0.748747	0.166651	4.4929	7.03e-06	2.44e-05	AC022364.1
ENSG00000272576	2.95551	-3.12941	1.1406	-2.74366	0.00607592	0.0146778	AC027271.1		ENSG00000180155	648.145	0.748773	0.101337	7.38891	1.48e-13	9.05e-13	LYNX1
ENSG00000231652	2.70699	-3.12919	1.18144	-2.64862	0.00808207	0.0190913	AL590428.1		ENSG00000165475	1725.75	0.748817	0.0546348	13.7059	9.36e-43	1.82e-41	CRYL1
ENSG00000102230	42.1986	-3.12849	0.313594	-9.97624	1.94e-23	1.93e-22	PCYT1B		ENSG00000235513	28.1415	0.750053	0.279914	2.67959	0.00737134	0.017542	AL035681.1
ENSG00000018236	39.5614	-3.12732	0.329512	-9.49075	2.29e-21	2.07e-20	CNTN1		ENSG00000268516	111.315	0.750841	0.190556	3.94027	8.14e-05	0.000253741	AC020915.2
ENSG00000037280	487.342	-3.12372	0.0982963	-31.7786	1.28e-221	5.02e-219	FLT4		ENSG00000068137	3149.62	0.751041	0.051489	14.5864	3.43e-48	7.86e-47	PLEKHH3
ENSG00000197062	97.0289	-3.12308	0.223519	-13.9723	2.3e-44	4.65e-43	ZSCAN26		ENSG00000262587	55.3001	0.751202	0.237063	3.16879	0.00153077	0.00405067	AC133552.2
ENSG00000184486	180.682	-3.12256	0.173296	-18.0186	1.39e-72	5.75e-71	POU3F2		ENSG00000101276	166.73	0.75162	0.135634	5.54153	3e-08	1.28e-07	SLC52A3
ENSG00000184828	23.0059	-3.12187	0.512077	-6.0965	1.08e-09	5.15e-09	ZBTB7C		ENSG00000227252	32.8052	0.751664	0.324003	2.31993	0.0203447	0.0441329	AC012063.1
ENSG00000178919	70.2208	-3.11997	0.263044	-11.861	1.89e-32	2.67e-31	FOXE1		ENSG00000197879	11320.9	0.752449	0.0414324	18.1609	1.05e-73	4.44e-72	MYO1C
ENSG00000204176	53.778	-3.11954	0.347931	-8.96597	3.08e-19	2.52e-18	SYT15		ENSG00000238123	235.883	0.753012	0.153569	4.90342	9.42e-07	3.56e-06	MID1IP1-AS1
ENSG00000261730	10.4022	-3.119	0.716863	-4.35091	1.36e-05	4.58e-05	AL034346.1		ENSG00000155366	2848.56	0.753541	0.0477756	15.7725	4.81e-56	1.35e-54	RHOC
ENSG00000188517	77.7764	-3.11833	0.238884	-13.0537	6.05e-39	1.05e-37	COL25A1		ENSG00000099338	106.256	0.753701	0.176786	4.26334	2.01e-05	6.69e-05	CATSPERG
ENSG00000172733	16.9719	-3.11799	0.489734	-6.3667	1.93e-10	9.71e-10	PURG		ENSG00000242516	362.884	0.754162	0.117407	6.42346	1.33e-10	6.76e-10	LINC00960
ENSG00000203883	30.7676	-3.11785	0.37731	-8.26336	1.42e-16	1.02e-15	SOX18		ENSG00000138434	8451.02	0.754941	0.0420284	17.9626	3.82e-72	1.57e-70	ITPRID2
ENSG00000173930	8.26244	-3.11609	0.652053	-4.77889	1.76e-06	6.48e-06	SLCO4C1		ENSG00000261659	300.079	0.75525	0.126228	5.98322	2.19e-09	1.02e-08	Z92544.2
ENSG00000185339	7.82733	-3.11198	0.695392	-4.47514	7.64e-06	2.64e-05	TCN2		ENSG00000116977	1163.79	0.755283	0.0535918	14.0933	4.18e-45	8.67e-44	LGALS8
ENSG00000109854	145.478	-3.11028	0.197852	-15.7202	1.1e-55	3.07e-54	HTATIP2		ENSG00000274525	39.5941	0.755357	0.318402	2.37234	0.0176758	0.0388958	AC008443.7
ENSG00000187867	15.6159	-3.10825	0.548731	-5.66444	1.48e-08	6.45e-08	PALM3		ENSG00000129214	45.6454	0.755367	0.303289	2.49059	0.0127532	0.0290159	SHBG
ENSG00000177822	18.1816	-3.10606	0.533032	-5.82717	5.64e-09	2.55e-08	TENM3-AS1		ENSG00000171124	185.688	0.755642	0.157132	4.80897	1.52e-06	5.61e-06	FUT3
ENSG00000196990	3.92082	-3.10343	0.99599	-3.11592	0.00183369	0.0047891	FAM163B		ENSG00000149573	531.855	0.755717	0.0854151	8.84758	8.94e-19	7.18e-18	MPZL2
ENSG00000162493	134.769	-3.103	0.175227	-17.7084	3.61e-70	1.4e-68	PDPN		ENSG00000205583	70.0022	0.756057	0.225479	3.35312	0.000799053	0.00219733	STAG3L1
ENSG00000124253	2.69093	-3.10268	1.3219	-2.34714	0.0189183	0.041306	PCK1		ENSG00000151239	4686.42	0.756499	0.0421494	17.9481	4.97e-72	2.03e-70	TWF1
ENSG00000180318	23.9751	-3.10206	0.441973	-7.01865	2.24e-12	1.28e-11	ALX1		ENSG00000166492	119.211	0.756524	0.180744	4.1856	2.84e-05	9.3e-05	FAM86GP
ENSG00000184838	4.6259	-3.1001	1.00117	-3.09646	0.00195844	0.00509722	PRR16		ENSG00000185201	664.632	0.756585	0.0873495	8.66158	4.65e-18	3.61e-17	IFITM2
ENSG00000250081	4.06946	-3.09897	1.07258	-2.88928	0.0038613	0.00964045	AC025176.1		ENSG00000273344	1379.01	0.756764	0.068256	11.0871	1.45e-28	1.79e-27	PAXIP1-AS1
ENSG00000140092	49.1536	-3.09808	0.361249	-8.57601	9.82e-18	7.5e-17	FBLN5		ENSG00000014914	122.926	0.757585	0.155856	4.86081	1.17e-06	4.38e-06	MTMR11
ENSG00000073792	429.323	-3.09803	0.0993939	-31.1693	2.78e-213	9.44e-211	IGF2BP2		ENSG00000234042	39.5913	0.757611	0.281753	2.68892	0.00716845	0.0170932	AL591438.2
ENSG00000158747	303.696	-3.09796	0.298286	-10.3859	2.88e-25	3.09e-24	NBL1		ENSG00000139132	699.284	0.757823	0.0843746	8.98165	2.67e-19	2.19e-18	FGD4
ENSG00000105997	148.338	-3.09617	0.19463	-15.908	5.58e-57	1.6e-55	HOXA3		ENSG00000172936	486.363	0.758279	0.0929574	8.15727	3.43e-16	2.41e-15	MYD88
ENSG00000141314	79.5821	-3.09464	0.221055	-13.9994	1.57e-44	3.2e-43	RHBDL3		ENSG00000181467	2613.74	0.758415	0.04564	16.6173	5.22e-62	1.68e-60	RAP2B
ENSG00000064225	46.9762	-3.09454	0.316821	-9.76746	1.55e-22	1.49e-21	ST3GAL6		ENSG00000128165	3693.12	0.758585	0.0659858	11.4962	1.38e-30	1.83e-29	ADM2
ENSG00000143333	304.683	-3.09281	0.130902	-23.627	2.04e-123	2.12e-121	RGS16		ENSG00000132329	3771.77	0.758631	0.0523364	14.4953	1.3e-47	2.92e-46	RAMP1
ENSG00000188338	56.8966	-3.0926	0.27349	-11.3079	1.2e-29	1.54e-28	SLC38A3		ENSG00000092421	1846.98	0.758755	0.0652916	11.621	3.22e-31	4.37e-30	SEMA6A
ENSG00000279072	6.22155	-3.09237	0.763359	-4.051	5.1e-05	0.000162752	AC118758.3		ENSG00000228288	120.4	0.759321	0.174913	4.34113	1.42e-05	4.78e-05	PCAT6
ENSG00000117525	14.103	-3.09172	0.706487	-4.37619	1.21e-05	4.1e-05	F3		ENSG00000277972	3504.99	0.759669	0.0532572	14.2642	3.66e-46	7.88e-45	CISD3
ENSG00000278058	12.2952	-3.09016	0.956913	-3.2293	0.00124095	0.003327	AC009159.3		ENSG00000141582	10958.6	0.759869	0.044607	17.0348	4.54e-65	1.59e-63	CBX4
ENSG00000117600	11.3506	-3.08952	0.671768	-4.59908	4.24e-06	1.51e-05	PLPPR4		ENSG00000165322	945.075	0.760025	0.0687661	11.0523	2.14e-28	2.62e-27	ARHGAP12
ENSG00000228065	80.7177	-3.08869	0.241215	-12.8047	1.54e-37	2.57e-36	LINC01515		ENSG00000225285	159.394	0.76047	0.179758	4.23053	2.33e-05	7.7e-05	LINC01770
ENSG00000182771	69.4213	-3.08857	0.262979	-11.7446	7.53e-32	1.05e-30	GRID1		ENSG00000204175	33.8823	0.760655	0.310627	2.44877	0.0143345	0.0322347	GPRIN2
ENSG00000197776	8.9995	-3.08849	0.650369	-4.74883	2.05e-06	7.48e-06	KLHDC1		ENSG00000078814	71.7189	0.760956	0.215344	3.53367	0.000409825	0.00117091	MYH7B
ENSG00000147655	2.87209	-3.087	1.24642	-2.47669	0.0132608	0.0300339	RSPO2		ENSG00000236552	550.867	0.760986	0.151114	5.03585	4.76e-07	1.85e-06	RPL13AP5
ENSG00000212747	86.2408	-3.0853	0.231067	-13.3524	1.15e-40	2.11e-39	RTL8B		ENSG00000283013	377.466	0.761113	0.119098	6.39064	1.65e-10	8.34e-10	#N/A
ENSG00000250588	52.9631	-3.08515	0.264143	-11.6798	1.62e-31	2.22e-30	#N/A		ENSG00000179832	1486.43	0.761143	0.0745499	10.2099	1.79e-24	1.86e-23	MROH1
ENSG00000148942	36.0499	-3.08201	0.380752	-8.09454	5.75e-16	4.01e-15	SLC5A12		ENSG00000233030	50.1409	0.761259	0.248093	3.06845	0.00215175	0.00556263	AC243772.2
ENSG00000176165	330	-3.07745	0.127239	-24.1865	3.09e-129	3.48e-127	FOXG1		ENSG00000170430	1273.61	0.76129	0.069116	11.0147	3.25e-28	3.95e-27	MGMT
ENSG00000091592	67.0569	-3.07735	0.254875	-12.074	1.45e-33	2.13e-32	NLRP1		ENSG00000141854	47.7849	0.761394	0.298303	2.55242	0.0106977	0.0246782	MISP3
ENSG00000138336	251.103	-3.07621	0.14806	-20.7767	7.03e-96	4.6e-94	TET1		ENSG00000176422	1103.26	0.76168	0.0813234	9.36606	7.53e-21	6.62e-20	SPRYD4
ENSG00000177301	19.2831	-3.07417	0.451957	-6.8019	1.03e-11	5.67e-11	KCNA2		ENSG00000233175	24.4228	0.761868	0.332272	2.2929	0.0218535	0.0470753	AC008105.1
ENSG00000172476	31.3196	-3.07415	0.34703	-8.85844	8.11e-19	6.53e-18	RAB40A		ENSG00000134996	1496.48	0.762051	0.0658159	11.5785	5.29e-31	7.11e-30	OSTF1
ENSG00000269486	26.1694	-3.07349	0.407564	-7.54112	4.66e-14	2.94e-13	ERVK9-11		ENSG00000166311	1499.98	0.762313	0.0777942	9.7991	1.14e-22	1.09e-21	SMPD1
ENSG00000255434	2.54494	-3.07181	1.32593	-2.31672	0.0205191	0.0444762	AP001922.6		ENSG00000272405	238.957	0.762389	0.146334	5.20992	1.89e-07	7.59e-07	AL365181.3
ENSG00000237863	79.6152	-3.07149	0.260594	-11.7865	4.58e-32	6.41e-31	AL035425.1		ENSG00000262772	68.7103	0.762888	0.183085	4.16684	3.09e-05	0.000100707	LINC01977
ENSG00000117519	681.211	-3.07071	0.0931738	-32.9567	3.39e-238	1.58e-235	CNN3		ENSG00000113916	1456.9	0.763199	0.0795924	9.58885	8.91e-22	8.21e-21	BCL6
ENSG00000107018	5.3357	-3.06533	0.965211	-3.17581	0.00149417	0.00395953	RLN1		ENSG00000217442	67.7129	0.763504	0.279803	2.72872	0.00635804	0.0153082	SYCE3
ENSG00000169554	183.496	-3.06472	0.143937	-21.2921	1.34e-100	9.56e-99	ZEB2		ENSG00000187210	911.598	0.763555	0.0713357	10.7037	9.78e-27	1.13e-25	GCNT1
ENSG00000170153	195.3	-3.06453	0.141432	-21.6678	4.13e-104	3.13e-102	RNF150		ENSG00000232352	63.4315	0.763575	0.209628	3.64253	0.000269973	0.000787461	SEMA3B-AS1
ENSG00000165186	3.36105	-3.06443	1.10955	-2.76187	0.00574708	0.013941	PTCHD1		ENSG00000260261	130.021	0.763889	0.15405	4.95871	7.1e-07	2.71e-06	AC124944.2
ENSG00000165655	2734.58	-3.06341	0.0718321	-42.6468	0	0	ZNF503		ENSG00000112379	9226.52	0.76426	0.0506359	15.0933	1.79e-51	4.5e-50	ARFGEF3
ENSG00000280374	17.1908	-3.06243	0.497048	-6.16124	7.22e-10	3.47e-09	AC019080.6		ENSG00000102996	5777.83	0.764382	0.0680248	11.2368	2.69e-29	3.4e-28	MMP15
ENSG00000165617	38.5753	-3.06101	0.30181	-10.1422	3.59e-24	3.68e-23	DACT1		ENSG00000141497	175.425	0.764685	0.133135	5.7437	9.26e-09	4.12e-08	ZMYND15
ENSG00000151468	88.9589	-3.05959	0.210114	-14.5616	4.93e-48	1.12e-46	CCDC3		ENSG00000166762	195.207	0.764705	0.158825	4.81476	1.47e-06	5.46e-06	CATSPER2
ENSG00000112182	87.5434	-3.05821	0.206089	-14.8393	8.16e-50	1.96e-48	BACH2		ENSG00000172771	366.785	0.764982	0.132219	5.78573	7.22e-09	3.24e-08	EFCAB12
ENSG00000270923	4.24667	-3.05817	1.19228	-2.56498	0.0103181	0.0238746	TAS2R6P		ENSG00000161677	814.59	0.76569	0.0787106	9.72792	2.29e-22	2.17e-21	JOSD2
ENSG00000175874	17.8036	-3.05737	0.536455	-5.69921	1.2e-08	5.3e-08	CREG2		ENSG00000182557	33.1388	0.765994	0.273513	2.80057	0.00510118	0.0124966	SPNS3
ENSG00000118402	100.036	-3.05686	0.205143	-14.9011	3.24e-50	7.85e-49	ELOVL4		ENSG00000174028	202.871	0.766229	0.129804	5.90299	3.57e-09	1.63e-08	FAM3C2
ENSG00000256248	2.60196	-3.0567	1.29781	-2.35527	0.0185093	0.0405031	#N/A		ENSG00000065518	5691.31	0.767198	0.0431223	17.7912	8.27e-71	3.27e-69	NDUFB4
ENSG00000136099	5.78221	-3.05546	0.75865	-4.0275	5.64e-05	0.000178958	PCDH8		ENSG00000273382	153.423	0.767723	0.159148	4.82396	1.41e-06	5.23e-06	AL356488.3
ENSG00000128408	38.5298	-3.05541	0.329644	-9.26881	1.88e-20	1.63e-19	RIBC2		ENSG00000277182	82.2705	0.768049	0.200868	3.82365	0.000131489	0.000399555	AC006449.5
ENSG00000175093	64.5268	-3.05352	0.25735	-11.8653	1.79e-32	2.54e-31	SPSB4		ENSG00000142347	31.9924	0.768285	0.307063	2.50204	0.012348	0.0281475	MYO1F
ENSG00000147231	1080.77	-3.05163	0.0951755	-32.0631	1.44e-225	5.74e-223	RADX		ENSG00000102886	54.1629	0.76867	0.243103	3.1619	0.00156741	0.00413965	GDPD3
ENSG00000099864	235.87	-3.05077	0.135318	-22.5451	1.5e-112	1.28e-110	PALM		ENSG00000257122	94.3488	0.769281	0.161018	4.77762	1.77e-06	6.52e-06	RRN3P3
ENSG00000253746	14.1275	-3.05074	0.595602	-5.12211	3.02e-07	1.2e-06	AC091182.2		ENSG00000113721	48.9008	0.76942	0.322688	2.38441	0.0171067	0.0377674	PDGFRB
ENSG00000205730	185.713	-3.0497	0.160146	-19.0432	7.48e-81	3.67e-79	ITPRIPL2		ENSG00000272009	66.5095	0.769637	0.217497	3.53861	0.000402238	0.00114995	AL121944.1
ENSG00000141431	27.8832	-3.04878	0.411968	-7.40053	1.36e-13	8.32e-13	ASXL3		ENSG00000213462	184.733	0.769733	0.132317	5.81734	5.98e-09	2.7e-08	ERV3-1
ENSG00000228140	2.20696	-3.04776	1.25743	-2.4238	0.015359	0.0343112	AL031283.1		ENSG00000138028	906.86	0.770183	0.0747649	10.3014	6.94e-25	7.35e-24	CGREF1
ENSG00000198915	101.267	-3.04741	0.241191	-12.6348	1.36e-36	2.18e-35	RASGEF1A		ENSG00000229320	242.193	0.770232	0.12689	6.0701	1.28e-09	6.04e-09	KRT8P12
ENSG00000182747	6.57409	-3.04655	0.751374	-4.05464	5.02e-05	0.000160399	SLC35D3		ENSG00000175197	2740.1	0.770542	0.06867	11.2209	3.22e-29	4.07e-28	DDIT3
ENSG00000149269	276.92	-3.04558	0.146921	-20.7293	1.89e-95	1.22e-93	PAK1		ENSG00000132376	1339.41	0.770785	0.0673862	11.4383	2.69e-30	3.54e-29	INPP5K
ENSG00000273007	4.54332	-3.04543	0.971262	-3.13554	0.00171537	0.00449802	AC021205.3		ENSG00000120049	46.6044	0.770968	0.267451	2.88265	0.00394342	0.00983209	KCNIP2
ENSG00000266850	2.50184	-3.04506	1.3161	-2.3137	0.0206841	0.0447807	AC090912.2		ENSG00000090661	830.262	0.770999	0.0934249	8.25261	1.55e-16	1.11e-15	CERS4
ENSG00000143320	106.454	-3.04463	0.208718	-14.5873	3.38e-48	7.77e-47	CRABP2		ENSG00000261068	43.4094	0.77125	0.275243	2.80207	0.00507764	0.0124433	AL512274.1
ENSG00000274943	30.7161	-3.03906	0.377394	-8.05275	8.1e-16	5.62e-15	AC079684.1		ENSG00000187720	261.117	0.771324	0.103279	7.46835	8.12e-14	5.05e-13	THSD4
ENSG00000265203	22.4077	-3.0383	1.30591	-2.32658	0.0199877	0.0434237	RBP3		ENSG00000274605	1042.63	0.772148	0.0663115	11.6443	2.45e-31	3.34e-30	PCCA-DT
ENSG00000282511	3.08684	-3.03776	1.25686	-2.41695	0.015651	0.0348927	CLUHP10		ENSG00000166415	330.044	0.772262	0.104888	7.36272	1.8e-13	1.1e-12	WDR72
ENSG00000169071	34.0134	-3.0373	0.36072	-8.42011	3.76e-17	2.79e-16	ROR2		ENSG00000166900	2171.67	0.772558	0.0416492	18.5492	8.28e-77	3.72e-75	STX3
ENSG00000198121	51.9374	-3.03718	0.283973	-10.6953	1.07e-26	1.23e-25	LPAR1		ENSG00000263847	28.1181	0.77278	0.292184	2.64484	0.00817296	0.0192877	AP005899.1
ENSG00000141753	116.953	-3.03704	0.19437	-15.6251	4.91e-55	1.35e-53	IGFBP4		ENSG00000102871	658.528	0.772862	0.108021	7.15475	8.38e-13	4.91e-12	TRADD
ENSG00000152932	14.6227	-3.03703	0.52557	-5.77855	7.53e-09	3.37e-08	RAB3C		ENSG00000103642	893.679	0.772994	0.0685219	11.281	1.63e-29	2.07e-28	LACTB
ENSG00000107984	2.99924	-3.03637	1.12032	-2.71027	0.0067229	0.0161119	DKK1		ENSG00000117461	1273.9	0.773097	0.050802	15.2179	2.69e-52	6.96e-51	PIK3R3
ENSG00000087303	149.207	-3.03316	0.169328	-17.913	9.34e-72	3.79e-70	NID2		ENSG00000167676	220.496	0.773101	0.116474	6.63752	3.19e-11	1.69e-10	PLIN4
ENSG00000121207	6.48745	-3.03277	0.839642	-3.61198	0.000303865	0.00088192	LRAT		ENSG00000168071	356.266	0.773123	0.10163	7.60723	2.8e-14	1.78e-13	CCDC88B
ENSG00000182963	327.385	-3.03256	0.132785	-22.8382	1.92e-115	1.74e-113	GJC1		ENSG00000108242	62.1243	0.773209	0.243062	3.18112	0.00146707	0.00389337	CYP2C18
ENSG00000267327	11.6459	-3.03211	0.567152	-5.34621	8.98e-08	3.7e-07	AC009271.1		ENSG00000147862	1546.28	0.773282	0.0629483	12.2844	1.1e-34	1.67e-33	NFIB
ENSG00000261409	1707.73	-3.03207	0.0735384	-41.231	0	0	AL035425.3		ENSG00000142669	869.055	0.773801	0.115922	6.67519	2.47e-11	1.32e-10	SH3BGRL3
ENSG00000226562	22.9728	-3.03194	0.414618	-7.31261	2.62e-13	1.58e-12	CYP4F26P		ENSG00000125813	310.708	0.774339	0.111568	6.94049	3.91e-12	2.2e-11	PAX1
ENSG00000164292	594.543	-3.02993	0.093812	-32.2979	7.47e-229	3.16e-226	RHOBTB3		ENSG00000254941	35.3201	0.77445	0.285382	2.71373	0.00665295	0.0159595	AP000866.4
ENSG00000128713	108.599	-3.02812	0.18736	-16.162	9.35e-59	2.77e-57	HOXD11		ENSG00000242028	99.1301	0.774675	0.171215	4.52457	6.05e-06	2.12e-05	HYPK
ENSG00000104332	203.052	-3.02779	0.157202	-19.2605	1.15e-82	5.89e-81	SFRP1		ENSG00000168890	290.973	0.774705	0.100591	7.70156	1.34e-14	8.71e-14	TMEM150A
ENSG00000145431	83.7747	-3.02724	0.218354	-13.8639	1.05e-43	2.08e-42	PDGFC		ENSG00000069943	422.266	0.774956	0.0966878	8.01504	1.1e-15	7.57e-15	PIGB
ENSG00000244219	4.63261	-3.02616	0.959281	-3.15461	0.00160714	0.00423563	TMEM225B		ENSG00000115350	1510.49	0.77527	0.0866779	8.94427	3.74e-19	3.05e-18	POLE4
ENSG00000168243	267.567	-3.02522	0.120471	-25.1116	3.71e-139	4.84e-137	GNG4		ENSG00000267809	218.141	0.77528	0.170239	4.55407	5.26e-06	1.85e-05	NDUFV2P1
ENSG00000279347	17.6899	-3.02516	0.513577	-5.89037	3.85e-09	1.76e-08	AC021945.1		ENSG00000130513	8895.81	0.77543	0.127097	6.1011	1.05e-09	5.01e-09	GDF15
ENSG00000162733	1645.97	-3.0248	0.077588	-38.9855	0	0	DDR2		ENSG00000160188	87.9709	0.775723	0.204516	3.79297	0.000148857	0.000448864	RSPH1
ENSG00000224114	10.8804	-3.02273	0.633305	-4.77295	1.82e-06	6.67e-06	AL591846.1		ENSG00000102878	409.631	0.776024	0.133784	5.80056	6.61e-09	2.97e-08	HSF4
ENSG00000134769	243.99	-3.02255	0.122655	-24.6427	4.41e-134	5.29e-132	DTNA		ENSG00000276488	43.7911	0.776315	0.253987	3.05651	0.00223931	0.00577331	AC008735.4
ENSG00000103202	955.031	-3.01669	0.0729156	-41.3724	0	0	NME4		ENSG00000174607	1032.67	0.776448	0.0685276	11.3304	9.27e-30	1.19e-28	UGT8
ENSG00000239528	18.2141	-3.01249	0.474213	-6.3526	2.12e-10	1.06e-09	RPS14P8		ENSG00000165487	4063.66	0.776747	0.0516023	15.0526	3.32e-51	8.26e-50	MICU2
ENSG00000157613	14.1977	-3.01243	0.558327	-5.39546	6.83e-08	2.84e-07	CREB3L1		ENSG00000118855	1610.14	0.7768	0.0576549	13.4733	2.25e-41	4.23e-40	MFSD1
ENSG00000166105	86.0694	-3.01141	0.249275	-12.0807	1.34e-33	1.96e-32	GLB1L3		ENSG00000163545	271.858	0.776843	0.11747	6.61311	3.76e-11	1.99e-10	NUAK2
ENSG00000095713	11.9166	-3.01118	0.650183	-4.63128	3.63e-06	1.3e-05	CRTAC1		ENSG00000229980	119.576	0.777304	0.18619	4.17479	2.98e-05	9.74e-05	TOB1-AS1
ENSG00000142512	21.3512	-3.00852	0.401861	-7.48647	7.08e-14	4.42e-13	SIGLEC10		ENSG00000274813	34.3398	0.777353	0.295533	2.63035	0.00852982	0.0200559	AC126915.2
ENSG00000271474	7.23909	-3.00665	0.775525	-3.87693	0.000105785	0.000325003	AC106881.1		ENSG00000164850	220.726	0.777432	0.141226	5.50488	3.69e-08	1.57e-07	GPER1
ENSG00000122641	7.55787	-3.00609	0.803755	-3.74006	0.000183975	0.00054784	INHBA		ENSG00000232926	36.8337	0.777623	0.302854	2.56765	0.010239	0.0237036	AC000078.1
ENSG00000130775	18.1687	-3.00523	0.548935	-5.47466	4.38e-08	1.86e-07	THEMIS2		ENSG00000140264	6962.99	0.777639	0.0797221	9.75437	1.77e-22	1.69e-21	SERF2
ENSG00000145335	73.0302	-3.00347	0.24647	-12.186	3.69e-34	5.52e-33	SNCA		ENSG00000185561	1199.51	0.777714	0.0628363	12.3768	3.49e-35	5.42e-34	TLCD2
ENSG00000019102	5.72045	-3.00338	0.915798	-3.27953	0.00103981	0.00281601	VSIG2		ENSG00000159314	733.913	0.778124	0.0811381	9.59012	8.8e-22	8.11e-21	ARHGAP27
ENSG00000107859	6.6382	-3.00337	0.937535	-3.20347	0.00135781	0.00362229	PITX3		ENSG00000152939	1389.74	0.778452	0.0624799	12.4593	1.25e-35	1.95e-34	MARVELD2
ENSG00000133083	41.1639	-3.00313	0.315692	-9.51284	1.86e-21	1.68e-20	DCLK1		ENSG00000039068	16671.8	0.778959	0.049484	15.7416	7.84e-56	2.2e-54	CDH1
ENSG00000188042	352.353	-3.00272	0.142773	-21.0314	3.39e-98	2.29e-96	ARL4C		ENSG00000166128	1031.55	0.779476	0.0586229	13.2964	2.43e-40	4.42e-39	RAB8B
ENSG00000147117	7.95967	-3.00073	0.756077	-3.96881	7.22e-05	0.000226372	ZNF157		ENSG00000161328	257.198	0.779644	0.100786	7.73561	1.03e-14	6.71e-14	LRRC56
ENSG00000178573	821.795	-3.00057	0.105379	-28.4741	2.45e-178	5.53e-176	MAF		ENSG00000248103	71.0645	0.779782	0.250053	3.11847	0.0018179	0.00475193	AC008443.3
ENSG00000137558	42.4841	-3.00024	0.292116	-10.2707	9.55e-25	1e-23	PI15		ENSG00000262580	254.128	0.779881	0.151721	5.14023	2.74e-07	1.09e-06	AC087741.1
ENSG00000118971	436.072	-2.99772	0.110643	-27.0935	1.17e-161	2.11e-159	CCND2		ENSG00000110697	1594.2	0.779909	0.0765225	10.1919	2.16e-24	2.24e-23	PITPNM1
ENSG00000074317	55.5272	-2.99706	0.324806	-9.22724	2.78e-20	2.38e-19	SNCB		ENSG00000151726	17409.3	0.780048	0.0569836	13.689	1.18e-42	2.29e-41	ACSL1
ENSG00000165996	62.8537	-2.99583	0.24939	-12.0126	3.05e-33	4.43e-32	HACD1		ENSG00000196189	1395.31	0.780223	0.0970716	8.0376	9.16e-16	6.34e-15	SEMA4A
ENSG00000154928	36.7147	-2.99203	0.344599	-8.68265	3.87e-18	3.01e-17	EPHB1		ENSG00000280213	44.7029	0.780383	0.294155	2.65296	0.00797882	0.0188636	UCKL1-AS1
ENSG00000102924	10.9833	-2.99196	0.653733	-4.57673	4.72e-06	1.67e-05	CBLN1		ENSG00000249641	203.791	0.78039	0.11157	6.99465	2.66e-12	1.51e-11	HOXC13-AS
ENSG00000117154	8.46612	-2.99045	0.828812	-3.60811	0.000308432	0.000894325	IGSF21		ENSG00000233223	748.214	0.780398	0.0723229	10.7905	3.82e-27	4.46e-26	AC016876.1
ENSG00000117245	103.487	-2.98966	0.199195	-15.0087	6.44e-51	1.59e-49	KIF17		ENSG00000168350	231.61	0.780911	0.135332	5.77036	7.91e-09	3.53e-08	DEGS2
ENSG00000163638	31.6567	-2.98879	0.772607	-3.86845	0.00010953	0.000336059	ADAMTS9		ENSG00000118508	371.786	0.781016	0.106872	7.30795	2.71e-13	1.63e-12	RAB32
ENSG00000253549	3.21815	-2.98783	1.09798	-2.7212	0.00650454	0.0156288	CA3-AS1		ENSG00000198892	527.827	0.781168	0.0828854	9.42468	4.31e-21	3.85e-20	SHISA4
ENSG00000010295	181.937	-2.98486	0.149605	-19.9515	1.45e-88	8.34e-87	IFFO1		ENSG00000280254	200.399	0.781282	0.125252	6.23769	4.44e-10	2.17e-09	AC233723.2
ENSG00000103742	139.727	-2.98371	0.175024	-17.0475	3.65e-65	1.28e-63	IGDCC4		ENSG00000164506	4622.2	0.781438	0.0475931	16.4191	1.4e-60	4.33e-59	STXBP5
ENSG00000168135	12.3823	-2.98359	0.553747	-5.388	7.12e-08	2.96e-07	KCNJ4		ENSG00000176978	5003.05	0.781506	0.04018	19.4501	2.91e-84	1.54e-82	DPP7
ENSG00000157827	310.933	-2.98278	0.117474	-25.3911	3.16e-142	4.44e-140	FMNL2		ENSG00000163898	35.4088	0.781647	0.342453	2.2825	0.02246	0.0482457	LIPH
ENSG00000135643	59.461	-2.98196	0.27293	-10.9257	8.69e-28	1.04e-26	KCNMB4		ENSG00000130182	42.7981	0.782127	0.240239	3.25563	0.00113142	0.0030497	ZSCAN10
ENSG00000188343	494.595	-2.98178	0.104859	-28.4362	7.21e-178	1.6e-175	FAM92A		ENSG00000101986	2174.98	0.782145	0.0799383	9.78435	1.31e-22	1.26e-21	ABCD1
ENSG00000109339	55.6886	-2.98123	0.297368	-10.0254	1.18e-23	1.19e-22	MAPK10		ENSG00000254909	32.9405	0.782449	0.320349	2.44249	0.0145864	0.0327529	AP003392.2
ENSG00000273107	2.59174	-2.98011	1.23719	-2.40877	0.0160066	0.0355815	AL512598.1		ENSG00000187695	165.187	0.782981	0.155994	5.01929	5.19e-07	2.01e-06	#N/A
ENSG00000157227	28.2827	-2.97753	0.373051	-7.98156	1.44e-15	9.86e-15	MMP14		ENSG00000196083	320.535	0.783092	0.104177	7.51696	5.61e-14	3.52e-13	IL1RAP
ENSG00000110455	65.2349	-2.9775	0.248157	-11.9985	3.62e-33	5.24e-32	ACCS		ENSG00000142606	275.519	0.78317	0.126102	6.21059	5.28e-10	2.56e-09	MMEL1
ENSG00000135063	28.6228	-2.97721	0.408583	-7.28667	3.18e-13	1.91e-12	FAM189A2		ENSG00000168528	3604.72	0.783477	0.0798496	9.81191	1e-22	9.7e-22	SERINC2
ENSG00000162344	8.38812	-2.97643	0.706477	-4.21306	2.52e-05	8.29e-05	FGF19		ENSG00000255320	46.6581	0.783665	0.276567	2.83354	0.00460354	0.0113666	AP000759.1
ENSG00000128591	626.638	-2.97558	0.116007	-25.65	4.23e-145	6.22e-143	FLNC		ENSG00000279044	40.0397	0.78386	0.296047	2.64776	0.00810281	0.0191353	AC007787.2
ENSG00000168917	106.324	-2.97513	0.208407	-14.2756	3.11e-46	6.7e-45	SLC35G2		ENSG00000180867	135.778	0.783952	0.160914	4.87187	1.11e-06	4.15e-06	PDIA3P1
ENSG00000226953	3.47467	-2.97468	1.06455	-2.79432	0.00520098	0.0127229	NCKAP5-AS2		ENSG00000232237	66.2737	0.783999	0.206247	3.80127	0.000143959	0.000435425	ASCL5
ENSG00000157111	32.2556	-2.97042	0.374044	-7.94137	2e-15	1.36e-14	TMEM171		ENSG00000140455	1472.6	0.784196	0.0688202	11.3949	4.44e-30	5.78e-29	USP3
ENSG00000132639	13.3674	-2.96959	0.523588	-5.67163	1.41e-08	6.19e-08	SNAP25		ENSG00000235590	42.0727	0.784322	0.247953	3.16319	0.0015605	0.00412377	GNAS-AS1
ENSG00000187772	270.762	-2.96889	0.121423	-24.4507	4.95e-132	5.81e-130	LIN28B		ENSG00000231908	143.377	0.784697	0.18973	4.13586	3.54e-05	0.000114681	IDH1-AS1
ENSG00000114529	63.0432	-2.96718	0.268563	-11.0484	2.23e-28	2.73e-27	C3orf52		ENSG00000203326	325.047	0.784878	0.10515	7.46434	8.37e-14	5.21e-13	ZNF525
ENSG00000156299	377.166	-2.96672	0.101948	-29.1002	3.57e-186	8.84e-184	TIAM1		ENSG00000268362	52.1228	0.784931	0.232823	3.37137	0.000747967	0.00206429	AC092279.1
ENSG00000131668	594.055	-2.96638	0.107331	-27.6376	3.93e-168	7.66e-166	BARX1		ENSG00000198431	11990.4	0.785307	0.0394372	19.9128	3.15e-88	1.8e-86	TXNRD1
ENSG00000130540	114.306	-2.96632	0.190539	-15.568	1.2e-54	3.26e-53	SULT4A1		ENSG00000178127	66.1975	0.785343	0.239989	3.27241	0.00106636	0.00288281	NDUFV2
ENSG00000104368	117.996	-2.96471	0.20356	-14.5643	4.74e-48	1.08e-46	PLAT		ENSG00000279382	194.642	0.785852	0.127009	6.18737	6.12e-10	2.95e-09	AC018665.1
ENSG00000166707	33.6367	-2.96467	0.355181	-8.34691	7.01e-17	5.13e-16	ZCCHC18		ENSG00000106617	735.998	0.786051	0.0734754	10.6982	1.04e-26	1.19e-25	PRKAG2
ENSG00000161243	50.5962	-2.96352	0.276483	-10.7186	8.32e-27	9.61e-26	FBXO27		ENSG00000223473	112.733	0.786529	0.166076	4.73596	2.18e-06	7.95e-06	#N/A
ENSG00000233384	7.13097	-2.96277	0.749856	-3.95113	7.78e-05	0.00024283	AC096537.1		ENSG00000178814	731.832	0.787094	0.0959525	8.20296	2.35e-16	1.67e-15	OPLAH
ENSG00000231327	14.9411	-2.96253	0.502725	-5.89294	3.79e-09	1.73e-08	LINC01816		ENSG00000265399	29.8914	0.787559	0.294346	2.67562	0.00745906	0.0177354	AP005329.2
ENSG00000170166	8.53408	-2.96151	0.73616	-4.02291	5.75e-05	0.000182201	HOXD4		ENSG00000276931	42.4302	0.788109	0.280213	2.81253	0.00491529	0.0120713	AC009041.4
ENSG00000196542	2.93697	-2.96032	1.29519	-2.28562	0.0222766	0.0479079	SPTSSB		ENSG00000265692	41.496	0.788323	0.297229	2.65224	0.00799587	0.018899	LINC01970
ENSG00000118777	20.3723	-2.95851	0.451143	-6.55781	5.46e-11	2.85e-10	ABCG2		ENSG00000277013	96.8433	0.788525	0.185089	4.26026	2.04e-05	6.77e-05	AC008556.1
ENSG00000229068	6.76961	-2.95733	0.785404	-3.76536	0.00016631	0.000498369	TMPOP1		ENSG00000115963	4333.06	0.788555	0.0521927	15.1085	1.42e-51	3.59e-50	RND3
ENSG00000147509	43.6884	-2.95595	0.302479	-9.77241	1.48e-22	1.42e-21	RGS20		ENSG00000231806	101.652	0.789265	0.187691	4.20514	2.61e-05	8.57e-05	PCAT7
ENSG00000246273	33.1063	-2.9531	0.383042	-7.7096	1.26e-14	8.19e-14	SBF2-AS1		ENSG00000221838	974.454	0.789445	0.070028	11.2733	1.78e-29	2.26e-28	AP4M1
ENSG00000159164	92.9337	-2.95061	0.231883	-12.7246	4.32e-37	7.09e-36	SV2A		ENSG00000183914	61.9989	0.789578	0.230195	3.43004	0.000603493	0.00168535	DNAH2
ENSG00000027869	143.569	-2.9504	0.172831	-17.071	2.44e-65	8.61e-64	SH2D2A		ENSG00000106459	1263.43	0.789723	0.0541822	14.5753	4.03e-48	9.22e-47	NRF1
ENSG00000019549	301.282	-2.94862	0.127048	-23.2087	3.72e-119	3.65e-117	SNAI2		ENSG00000197599	30.6066	0.790145	0.327977	2.40915	0.0159897	0.0355527	CCDC154
ENSG00000262601	20.5587	-2.94855	0.422016	-6.98684	2.81e-12	1.6e-11	#N/A		ENSG00000106211	17420.3	0.79016	0.0641602	12.3154	7.48e-35	1.14e-33	HSPB1
ENSG00000214575	40.6655	-2.94765	0.306539	-9.61591	6.85e-22	6.35e-21	CPEB1		ENSG00000107537	1745.32	0.790695	0.0742036	10.6557	1.64e-26	1.87e-25	PHYH
ENSG00000144488	102.48	-2.94565	0.20691	-14.2364	5.45e-46	1.17e-44	ESPNL		ENSG00000215374	86.7061	0.790783	0.194183	4.07236	4.65e-05	0.00014936	FAM66B
ENSG00000185404	58.4889	-2.9452	0.270936	-10.8704	1.59e-27	1.89e-26	SP140L		ENSG00000225302	281.105	0.790811	0.102031	7.75069	9.14e-15	5.99e-14	#N/A
ENSG00000026652	190.745	-2.94419	0.147284	-19.9899	6.74e-89	3.89e-87	AGPAT4		ENSG00000111057	4551.22	0.790952	0.0730643	10.8254	2.61e-27	3.07e-26	KRT18
ENSG00000187479	52.1957	-2.94318	0.281969	-10.438	1.66e-25	1.81e-24	C11orf96		ENSG00000215788	99.3081	0.791369	0.165768	4.77396	1.81e-06	6.64e-06	TNFRSF25
ENSG00000148541	25.8064	-2.94156	0.395023	-7.44654	9.58e-14	5.95e-13	FAM13C		ENSG00000145214	2254.6	0.791472	0.0518922	15.2522	1.59e-52	4.15e-51	DGKQ
ENSG00000163923	92.8914	-2.94125	0.242861	-12.1108	9.26e-34	1.37e-32	RPL39L		ENSG00000267868	99.4372	0.791497	0.171972	4.60247	4.18e-06	1.49e-05	AL356740.1
ENSG00000106483	3.21665	-2.93811	1.13753	-2.58289	0.00979778	0.0227588	SFRP4		ENSG00000140563	1689.66	0.791543	0.0566982	13.9606	2.71e-44	5.47e-43	MCTP2
ENSG00000185532	158.621	-2.93773	0.15916	-18.4577	4.52e-76	2.01e-74	PRKG1		ENSG00000266777	33.6884	0.791643	0.290351	2.7265	0.00640093	0.015406	SH3GL1P1
ENSG00000138772	9.44384	-2.93721	0.633836	-4.63402	3.59e-06	1.28e-05	ANXA3		ENSG00000129195	754.399	0.792117	0.0846729	9.35502	8.36e-21	7.34e-20	PIMREG
ENSG00000266265	7.05526	-2.93492	0.715121	-4.10409	4.06e-05	0.000131018	KLF14		ENSG00000204930	37.6054	0.79217	0.24352	3.253	0.00114195	0.00307626	FAM221B
ENSG00000092969	7.00627	-2.93434	0.753496	-3.8943	9.85e-05	0.000303794	TGFB2		ENSG00000099282	2856.55	0.792467	0.0469073	16.8943	4.95e-64	1.68e-62	TSPAN15
ENSG00000184785	67.974	-2.93418	0.255859	-11.468	1.91e-30	2.52e-29	SMIM10		ENSG00000180539	26.8914	0.792512	0.316941	2.50051	0.0124016	0.0282649	C9orf139
ENSG00000105810	645.905	-2.93303	0.0949285	-30.8973	1.3e-209	4.2e-207	CDK6		ENSG00000127870	4400.31	0.792913	0.0440793	17.9883	2.41e-72	9.9e-71	RNF6
ENSG00000138670	33.0447	-2.93289	0.370127	-7.92401	2.3e-15	1.55e-14	RASGEF1B		ENSG00000273136	210.443	0.793038	0.132461	5.98695	2.14e-09	9.94e-09	NBPF26
ENSG00000213626	22.9139	-2.93231	0.407605	-7.194	6.29e-13	3.72e-12	LBH		ENSG00000253327	29.9916	0.793198	0.320752	2.47293	0.0134011	0.0303142	RAD21-AS1
ENSG00000100599	91.2147	-2.93155	0.200946	-14.5887	3.31e-48	7.62e-47	RIN3		ENSG00000271851	105.488	0.793215	0.183885	4.31364	1.61e-05	5.39e-05	AC087501.4
ENSG00000079931	234.956	-2.93115	0.127645	-22.9632	1.09e-116	1.02e-114	MOXD1		ENSG00000259479	484.491	0.79329	0.108517	7.31025	2.67e-13	1.61e-12	SORD2P
ENSG00000112599	21.4015	-2.93073	0.460759	-6.36066	2.01e-10	1.01e-09	GUCA1B		ENSG00000077454	687.531	0.793467	0.0946146	8.38631	5.02e-17	3.7e-16	LRCH4
ENSG00000137463	38.1805	-2.92894	0.377549	-7.75778	8.64e-15	5.67e-14	MGARP		ENSG00000156564	26.8668	0.793958	0.3145	2.52451	0.0115859	0.0265578	LRFN2
ENSG00000218336	166.64	-2.92833	0.165107	-17.736	2.21e-70	8.67e-69	TENM3		ENSG00000197978	341.419	0.794742	0.10133	7.84311	4.4e-15	2.93e-14	GOLGA6L9
ENSG00000134569	148.776	-2.92819	0.172962	-16.9296	2.72e-64	9.31e-63	LRP4		ENSG00000173530	717.556	0.794977	0.0758937	10.4749	1.13e-25	1.24e-24	TNFRSF10D
ENSG00000245857	16.5417	-2.92451	0.514274	-5.68667	1.3e-08	5.69e-08	AF233439.1		ENSG00000249437	27.4992	0.795129	0.310865	2.5578	0.0105338	0.0243368	NAIP
ENSG00000163081	3.92009	-2.92324	0.983248	-2.97304	0.00294865	0.00748006	CCDC140		ENSG00000130844	492.358	0.795154	0.0818349	9.71657	2.56e-22	2.42e-21	ZNF331
ENSG00000157152	45.1044	-2.9222	0.334767	-8.72905	2.57e-18	2.01e-17	SYN2		ENSG00000263427	67.4396	0.795262	0.296068	2.68608	0.00722951	0.0172284	AC129492.2
ENSG00000101417	28.9228	-2.92198	0.390508	-7.4825	7.29e-14	4.55e-13	PXMP4		ENSG00000179841	765.538	0.795374	0.0997786	7.97139	1.57e-15	1.07e-14	AKAP5
ENSG00000063438	397.24	-2.92052	0.105703	-27.6295	4.93e-168	9.47e-166	AHRR		ENSG00000121691	3454.86	0.795415	0.0550679	14.4443	2.72e-47	6.08e-46	CAT
ENSG00000258623	6.32566	-2.91814	0.774996	-3.76536	0.000166307	0.000498369	AL121820.1		ENSG00000272602	1286.8	0.795856	0.0586379	13.5724	5.84e-42	1.11e-40	ZNF595
ENSG00000115295	167.107	-2.91796	0.161445	-18.074	5.11e-73	2.13e-71	CLIP4		ENSG00000092010	2363.2	0.795857	0.0630322	12.6262	1.51e-36	2.43e-35	PSME1
ENSG00000278668	5.58681	-2.91772	0.848937	-3.43691	0.000588401	0.00164482	AC005899.7		ENSG00000249637	85.9218	0.796076	0.185079	4.30128	1.7e-05	5.69e-05	AC008438.1
ENSG00000105559	49.0581	-2.91762	0.269686	-10.8186	2.81e-27	3.3e-26	PLEKHA4		ENSG00000167705	1003.19	0.796153	0.0683194	11.6534	2.21e-31	3.01e-30	RILP
ENSG00000269934	2.40443	-2.91664	1.15214	-2.53149	0.0113578	0.026085	AL353593.1		ENSG00000167103	217.946	0.796364	0.138466	5.75132	8.85e-09	3.94e-08	PIP5KL1
ENSG00000152785	2.93353	-2.9161	1.23069	-2.36949	0.0178126	0.0391498	BMP3		ENSG00000229089	41.3885	0.79684	0.335622	2.37421	0.0175863	0.0387206	ANKRD20A8P
ENSG00000196562	245.228	-2.91575	0.135911	-21.4534	4.25e-102	3.14e-100	SULF2		ENSG00000262188	33.4116	0.797033	0.316459	2.5186	0.0117824	0.0269699	LINC01978
ENSG00000077782	530.96	-2.91523	0.0930337	-31.3352	1.55e-215	5.45e-213	FGFR1		ENSG00000121380	73.4773	0.797376	0.204117	3.90647	9.37e-05	0.000289874	BCL2L14
ENSG00000132932	20.8351	-2.91311	0.53396	-5.45567	4.88e-08	2.06e-07	ATP8A2		ENSG00000100429	113.344	0.79749	0.158408	5.0344	4.79e-07	1.86e-06	HDAC10
ENSG00000225882	8.42225	-2.91097	0.661808	-4.39852	1.09e-05	3.72e-05	LINC01456		ENSG00000247400	333.728	0.797494	0.100329	7.94878	1.88e-15	1.28e-14	DNAJC3-DT
ENSG00000241472	47.9985	-2.91092	0.274167	-10.6173	2.48e-26	2.8e-25	PTPRG-AS1		ENSG00000119669	5873.24	0.797738	0.0664451	12.006	3.31e-33	4.79e-32	IRF2BPL
ENSG00000142700	18.3619	-2.90941	0.441989	-6.58254	4.62e-11	2.43e-10	DMRTA2		ENSG00000135253	129.175	0.79777	0.183823	4.33988	1.43e-05	4.81e-05	KCP
ENSG00000182718	393.341	-2.90807	0.116276	-25.0101	4.75e-138	6.02e-136	ANXA2		ENSG00000111907	1615.8	0.797808	0.0544148	14.6616	1.14e-48	2.64e-47	TPD52L1
ENSG00000260128	3.8443	-2.90766	1.17054	-2.48404	0.0129902	0.0294867	ULK4P2		ENSG00000167363	398.143	0.798477	0.107008	7.46188	8.53e-14	5.3e-13	FN3K
ENSG00000263400	7.49467	-2.90644	0.749579	-3.87743	0.000105567	0.000324444	TMEM220-AS1		ENSG00000215845	1275.93	0.798738	0.0849376	9.40382	5.26e-21	4.67e-20	TSTD1
ENSG00000227128	60.2058	-2.90466	0.255601	-11.364	6.32e-30	8.16e-29	LBX1-AS1		ENSG00000096092	1049.77	0.799628	0.0743372	10.7568	5.51e-27	6.39e-26	TMEM14A
ENSG00000143845	168.061	-2.90414	0.148777	-19.52	7.42e-85	3.96e-83	ETNK2		ENSG00000277224	66.6468	0.80005	0.223279	3.58319	0.000339428	0.000980273	HIST1H2BF
ENSG00000103489	59.5047	-2.90237	0.245348	-11.8296	2.74e-32	3.87e-31	XYLT1		ENSG00000281912	117.241	0.801215	0.176783	4.53219	5.84e-06	2.05e-05	LINC01144
ENSG00000164045	1858.55	-2.90216	0.0560533	-51.775	0	0	CDC25A		ENSG00000227107	23.7582	0.801615	0.312678	2.56371	0.0103559	0.0239522	AC104667.1
ENSG00000136928	69.7813	-2.90188	0.248964	-11.6558	2.14e-31	2.93e-30	GABBR2		ENSG00000224358	50.6358	0.801616	0.220015	3.64347	0.00026899	0.000784844	TMCO1-AS1
ENSG00000166448	17.9246	-2.90159	0.471653	-6.15197	7.65e-10	3.67e-09	TMEM130		ENSG00000157992	815.042	0.802064	0.0689229	11.6371	2.67e-31	3.63e-30	KRTCAP3
ENSG00000235531	17.8177	-2.90148	0.456651	-6.35383	2.1e-10	1.05e-09	MSC-AS1		ENSG00000158109	1644.14	0.802111	0.0595788	13.463	2.58e-41	4.85e-40	TPRG1L
ENSG00000050438	21.72	-2.90114	0.426318	-6.8051	1.01e-11	5.55e-11	SLC4A8		ENSG00000161405	233.426	0.80213	0.133499	6.00852	1.87e-09	8.74e-09	IKZF3
ENSG00000166813	401.864	-2.90061	0.118893	-24.3969	1.84e-131	2.14e-129	KIF7		ENSG00000127824	1805.04	0.80301	0.0555607	14.4529	2.41e-47	5.38e-46	TUBA4A
ENSG00000113580	213.807	-2.90055	0.130244	-22.2702	7.18e-110	5.91e-108	NR3C1		ENSG00000273888	47.8094	0.803166	0.255918	3.13837	0.00169889	0.00446034	FRMD6-AS1
ENSG00000123453	34.8441	-2.9005	0.362021	-8.01196	1.13e-15	7.76e-15	SARDH		ENSG00000140832	346.288	0.803483	0.102779	7.81758	5.38e-15	3.57e-14	MARVELD3
ENSG00000004399	230.587	-2.89987	0.139084	-20.8497	1.53e-96	1.01e-94	PLXND1		ENSG00000251580	59.0003	0.803774	0.219564	3.66077	0.000251455	0.000737197	LINC02482
ENSG00000137869	2.21095	-2.89942	1.2317	-2.35399	0.0185733	0.0406268	CYP19A1		ENSG00000185088	2117.71	0.803854	0.0887107	9.06153	1.29e-19	1.07e-18	RPS27L
ENSG00000179331	36.1677	-2.89939	0.322853	-8.98053	2.69e-19	2.21e-18	RAB39A		ENSG00000110844	733.382	0.803867	0.0709594	11.3286	9.48e-30	1.22e-28	PRPF40B
ENSG00000107105	98.1627	-2.89907	0.204111	-14.2034	8.72e-46	1.85e-44	ELAVL2		ENSG00000255302	8669	0.803937	0.0446822	17.9923	2.24e-72	9.22e-71	EID1
ENSG00000101098	393.981	-2.89799	0.114231	-25.3695	5.47e-142	7.64e-140	RIMS4		ENSG00000144045	155.248	0.804282	0.146325	5.49654	3.87e-08	1.65e-07	DQX1
ENSG00000158748	15.8963	-2.89767	0.63529	-4.56117	5.09e-06	1.8e-05	HTR6		ENSG00000229214	59.6877	0.804288	0.214762	3.74502	0.000180381	0.000537779	LINC00242
ENSG00000152208	4.13872	-2.89581	0.965847	-2.9982	0.00271577	0.0069225	GRID2		ENSG00000269038	34.5309	0.804835	0.317131	2.53787	0.011153	0.0256554	AP001462.1
ENSG00000232164	3.77193	-2.89254	1.07833	-2.68242	0.00730918	0.0173986	LINC01873		ENSG00000157214	19624.9	0.804893	0.038099	21.1263	4.55e-99	3.14e-97	STEAP2
ENSG00000163661	9.73554	-2.89171	0.600222	-4.81773	1.45e-06	5.38e-06	PTX3		ENSG00000168026	155.745	0.805326	0.154287	5.21965	1.79e-07	7.21e-07	TTC21A
ENSG00000109072	5.38764	-2.88962	0.989537	-2.92018	0.00349835	0.00878132	VTN		ENSG00000155368	4964.32	0.80564	0.0611789	13.1686	1.33e-39	2.36e-38	DBI
ENSG00000135144	11.6602	-2.8893	0.592525	-4.87625	1.08e-06	4.06e-06	DTX1		ENSG00000196890	141.336	0.805718	0.168919	4.76985	1.84e-06	6.76e-06	HIST3H2BB
ENSG00000158258	28.1118	-2.88621	0.383859	-7.51892	5.52e-14	3.46e-13	CLSTN2		ENSG00000264769	27.6424	0.805825	0.329	2.44932	0.0143127	0.0321962	AC145207.8
ENSG00000105971	81.3574	-2.88401	0.21762	-13.2525	4.37e-40	7.86e-39	CAV2		ENSG00000138835	2354.83	0.80593	0.0460617	17.4968	1.52e-68	5.67e-67	RGS3
ENSG00000153707	70.6222	-2.88399	0.272466	-10.5848	3.51e-26	3.93e-25	PTPRD		ENSG00000173825	92.4772	0.806256	0.191938	4.2006	2.66e-05	8.73e-05	TIGD3
ENSG00000095596	21.8008	-2.88398	0.405783	-7.10721	1.18e-12	6.87e-12	CYP26A1		ENSG00000167861	4578.57	0.807063	0.0557597	14.4739	1.77e-47	3.97e-46	HID1
ENSG00000079257	28.5599	-2.88229	0.358353	-8.04316	8.76e-16	6.06e-15	LXN		ENSG00000111319	1757.91	0.807838	0.0529322	15.2617	1.38e-52	3.59e-51	SCNN1A
ENSG00000160219	5.02255	-2.88217	0.943996	-3.05316	0.00226443	0.00583533	GAB3		ENSG00000270362	94.7669	0.80788	0.176853	4.56808	4.92e-06	1.74e-05	HMGN3-AS1
ENSG00000165633	64.1171	-2.8815	0.245697	-11.7279	9.18e-32	1.27e-30	VSTM4		ENSG00000273619	138.164	0.807992	0.189394	4.2662	1.99e-05	6.61e-05	AL121832.2
ENSG00000261462	3.90211	-2.88083	1.05334	-2.73495	0.00623899	0.0150347	AC004023.1		ENSG00000105707	2105.62	0.808222	0.0758508	10.6554	1.65e-26	1.87e-25	HPN
ENSG00000077935	22.485	-2.87875	0.411622	-6.99366	2.68e-12	1.52e-11	SMC1B		ENSG00000104964	4371.25	0.808253	0.0466398	17.3297	2.81e-67	1.02e-65	TLE5
ENSG00000111432	28.4619	-2.87858	0.338944	-8.49281	2.02e-17	1.52e-16	FZD10		ENSG00000160602	398.288	0.808293	0.119156	6.7835	1.17e-11	6.41e-11	NEK8
ENSG00000187498	298.928	-2.87593	0.12647	-22.74	1.8e-114	1.63e-112	COL4A1		ENSG00000274922	100.682	0.809087	0.164025	4.93271	8.11e-07	3.08e-06	AL139384.1
ENSG00000138622	34.7404	-2.87571	0.3168	-9.07736	1.11e-19	9.3e-19	HCN4		ENSG00000165929	1908.07	0.8093	0.0478701	16.9062	4.05e-64	1.38e-62	TC2N
ENSG00000206129	7.10212	-2.87502	0.716003	-4.01537	5.94e-05	0.00018774	AC006305.1		ENSG00000261186	27.9976	0.809569	0.326255	2.4814	0.0130869	0.029672	LINC01238
ENSG00000221994	23.9169	-2.87448	0.415116	-6.92453	4.37e-12	2.46e-11	ZNF630		ENSG00000141668	832.337	0.809802	0.0870133	9.30665	1.32e-20	1.15e-19	CBLN2
ENSG00000229676	4.56825	-2.87402	1.00114	-2.87075	0.00409497	0.0101878	ZNF492		ENSG00000135269	6868.48	0.810017	0.0331539	24.432	7.82e-132	9.15e-130	TES
ENSG00000120440	8.51503	-2.872	0.658736	-4.35987	1.3e-05	4.4e-05	TTLL2		ENSG00000128335	494.055	0.810241	0.084555	9.58242	9.48e-22	8.72e-21	APOL2
ENSG00000038295	6.40164	-2.87084	0.79902	-3.59296	0.000326949	0.000945922	TLL1		ENSG00000101210	14611.2	0.810776	0.0747189	10.851	1.97e-27	2.33e-26	EEF1A2
ENSG00000226530	13.2943	-2.86932	0.584165	-4.91184	9.02e-07	3.41e-06	AL158055.1		ENSG00000136883	104.361	0.81095	0.198045	4.09478	4.23e-05	0.000136138	KIF12
ENSG00000163032	5.49357	-2.8681	0.825532	-3.47424	0.000512305	0.00144316	VSNL1		ENSG00000164877	486.687	0.811107	0.0923799	8.78012	1.63e-18	1.29e-17	MICALL2
ENSG00000250821	3.02475	-2.86562	1.18013	-2.42822	0.015173	0.0339344	EXOC1L		ENSG00000118898	453.15	0.811527	0.0865585	9.37547	6.89e-21	6.07e-20	PPL
ENSG00000254560	26.8887	-2.86503	0.372484	-7.69167	1.45e-14	9.37e-14	BBOX1-AS1		ENSG00000198363	10729.5	0.811567	0.0393639	20.6171	1.93e-94	1.22e-92	ASPH
ENSG00000183798	162.61	-2.86418	0.216564	-13.2256	6.25e-40	1.12e-38	EMILIN3		ENSG00000111077	2161.22	0.811644	0.0769099	10.5532	4.91e-26	5.47e-25	TNS2
ENSG00000138639	12.3344	-2.86312	0.575213	-4.97748	6.44e-07	2.47e-06	ARHGAP24		ENSG00000135374	487.971	0.811686	0.0871382	9.31493	1.22e-20	1.06e-19	ELF5
ENSG00000122870	60.3994	-2.86275	0.270497	-10.5833	3.56e-26	3.99e-25	BICC1		ENSG00000113732	2776.91	0.811823	0.087081	9.32262	1.14e-20	9.9e-20	ATP6V0E1
ENSG00000101445	38.2366	-2.86184	0.329518	-8.68493	3.79e-18	2.95e-17	PPP1R16B		ENSG00000187961	1716.07	0.811864	0.0738712	10.9903	4.26e-28	5.15e-27	KLHL17
ENSG00000126583	9.0088	-2.86026	0.656243	-4.35853	1.31e-05	4.43e-05	PRKCG		ENSG00000177674	2706.24	0.812039	0.0587943	13.8115	2.17e-43	4.27e-42	AGTRAP
ENSG00000250546	13.5979	-2.8595	0.50932	-5.61434	1.97e-08	8.56e-08	AC079160.1		ENSG00000124762	2759.15	0.812683	0.0455397	17.8456	3.13e-71	1.25e-69	CDKN1A
ENSG00000137727	63.2557	-2.85778	0.272635	-10.4821	1.04e-25	1.15e-24	ARHGAP20		ENSG00000249082	46.9263	0.812814	0.260365	3.12182	0.00179735	0.00470176	C5orf66-AS1
ENSG00000171757	92.2689	-2.85648	0.201094	-14.2047	8.57e-46	1.82e-44	LRRC34		ENSG00000279741	37.2353	0.812906	0.295226	2.75351	0.00589604	0.0142746	AC007342.8
ENSG00000226237	2.79862	-2.85489	1.22792	-2.32497	0.0200733	0.0435889	GAS1RR		ENSG00000180066	112.844	0.813139	0.189331	4.29481	1.75e-05	5.84e-05	C10orf91
ENSG00000125726	48.5216	-2.85314	0.270812	-10.5355	5.93e-26	6.58e-25	CD70		ENSG00000187608	967.577	0.814031	0.0960372	8.47621	2.33e-17	1.75e-16	ISG15
ENSG00000135097	179.282	-2.85136	0.143323	-19.8946	4.53e-88	2.56e-86	MSI1		ENSG00000241316	45.475	0.815487	0.265768	3.06842	0.00215192	0.00556263	SUCLG2-AS1
ENSG00000087495	18.5762	-2.85101	0.496666	-5.7403	9.45e-09	4.2e-08	PHACTR3		ENSG00000117308	1512.59	0.815534	0.0549273	14.8475	7.22e-50	1.73e-48	GALE
ENSG00000100504	2057.91	-2.84982	0.0507917	-56.1079	0	0	PYGL		ENSG00000260912	140.112	0.815684	0.173316	4.70635	2.52e-06	9.15e-06	AL158206.1
ENSG00000234224	3.39637	-2.84923	1.07913	-2.64031	0.00828309	0.0195258	TMEM229A		ENSG00000101096	119.747	0.815833	0.15014	5.43381	5.52e-08	2.32e-07	NFATC2
ENSG00000205795	10.9606	-2.84839	0.597697	-4.7656	1.88e-06	6.9e-06	CYS1		ENSG00000270533	113.264	0.815955	0.176883	4.61297	3.97e-06	1.42e-05	CR382285.1
ENSG00000078053	33.2421	-2.84795	0.33672	-8.45793	2.72e-17	2.04e-16	AMPH		ENSG00000137845	4189.55	0.816057	0.043201	18.8898	1.38e-79	6.66e-78	ADAM10
ENSG00000197705	11.7962	-2.84564	0.559765	-5.08363	3.7e-07	1.46e-06	KLHL14		ENSG00000242599	23.4081	0.816389	0.348903	2.33987	0.0192903	0.0420413	CSAG4
ENSG00000281706	22.5326	-2.84528	0.443597	-6.41411	1.42e-10	7.18e-10	AL009179.1		ENSG00000185880	887.51	0.816611	0.0734049	11.1247	9.51e-29	1.18e-27	TRIM69
ENSG00000170439	12.7887	-2.84499	0.625639	-4.54733	5.43e-06	1.91e-05	METTL7B		ENSG00000124507	769.155	0.81697	0.0990074	8.25161	1.56e-16	1.12e-15	PACSIN1
ENSG00000108813	39.4047	-2.84411	0.342335	-8.30799	9.73e-17	7.06e-16	DLX4		ENSG00000260244	666.257	0.817112	0.0871086	9.38038	6.57e-21	5.8e-20	AC104083.1
ENSG00000166669	41.7975	-2.84324	0.32515	-8.74441	2.24e-18	1.76e-17	ATF7IP2		ENSG00000189398	58.644	0.817126	0.228993	3.56835	0.00035924	0.00103412	OR7E12P
ENSG00000183691	21.0857	-2.839	0.409558	-6.93186	4.15e-12	2.34e-11	NOG		ENSG00000189143	7522.05	0.817487	0.0487606	16.7653	4.37e-63	1.44e-61	CLDN4
ENSG00000139508	37.1891	-2.83723	0.346072	-8.19838	2.44e-16	1.73e-15	SLC46A3		ENSG00000261324	65.9504	0.817551	0.231465	3.53208	0.000412312	0.00117753	AC010168.2
ENSG00000223960	148.445	-2.83279	0.158635	-17.8572	2.54e-71	1.02e-69	CHROMR		ENSG00000263069	43.2915	0.817859	0.317499	2.57594	0.00999672	0.0231818	RNF213-AS1
ENSG00000234352	8.41596	-2.83274	0.826649	-3.42678	0.000610792	0.0017047	AC009264.1		ENSG00000171428	369.457	0.817953	0.103582	7.8967	2.86e-15	1.92e-14	NAT1
ENSG00000135074	69.5759	-2.83159	0.23193	-12.2088	2.79e-34	4.18e-33	ADAM19		ENSG00000276791	185.258	0.818069	0.134959	6.0616	1.35e-09	6.36e-09	AC092117.1
ENSG00000101871	827.036	-2.82867	0.0700502	-40.3806	0	0	MID1		ENSG00000167716	1487.22	0.818129	0.0771344	10.6065	2.78e-26	3.13e-25	WDR81
ENSG00000166582	375.15	-2.8282	0.106781	-26.4861	1.4e-154	2.36e-152	CENPV		ENSG00000162066	449.501	0.818164	0.0970458	8.4307	3.44e-17	2.56e-16	AMDHD2
ENSG00000137968	240.616	-2.82652	0.12624	-22.3901	4.92e-111	4.11e-109	SLC44A5		ENSG00000002079	44.5171	0.818212	0.252948	3.23471	0.00121766	0.00326868	MYH16
ENSG00000261613	4.79472	-2.82487	0.886021	-3.18827	0.00143129	0.00380575	AC093525.6		ENSG00000271643	50.3222	0.818313	0.268493	3.0478	0.00230526	0.00593112	AC112220.2
ENSG00000154080	4.09404	-2.82413	1.01249	-2.7893	0.00528221	0.0128998	CHST9		ENSG00000213722	888.63	0.818813	0.0777315	10.5339	6.03e-26	6.69e-25	DDAH2
ENSG00000005108	6.90598	-2.82365	0.763892	-3.6964	0.000218675	0.00064509	THSD7A		ENSG00000281189	75.1381	0.819278	0.205554	3.98571	6.73e-05	0.000211519	GHET1
ENSG00000162551	33.6738	-2.82162	0.321097	-8.78744	1.53e-18	1.22e-17	ALPL		ENSG00000131401	50.3893	0.819287	0.244346	3.35297	0.000799482	0.00219807	NAPSB
ENSG00000081189	75.507	-2.82046	0.214929	-13.1228	2.44e-39	4.28e-38	MEF2C		ENSG00000221821	411.089	0.819451	0.11875	6.90067	5.18e-12	2.89e-11	C6orf226
ENSG00000147614	12.3782	-2.82036	0.542748	-5.19643	2.03e-07	8.15e-07	ATP6V0D2		ENSG00000078114	3009.97	0.81954	0.0507244	16.1567	1.02e-58	3.01e-57	NEBL
ENSG00000142408	84.7882	-2.81821	0.209948	-13.4234	4.41e-41	8.24e-40	CACNG8		ENSG00000070985	31.4579	0.81954	0.332527	2.46458	0.0137174	0.0309713	TRPM5
ENSG00000235084	3.11233	-2.81561	1.1364	-2.47765	0.0132252	0.0299583	CHCHD2P6		ENSG00000172818	129.982	0.820029	0.167945	4.88274	1.05e-06	3.94e-06	OVOL1
ENSG00000173208	3.65222	-2.81533	1.12518	-2.50213	0.0123449	0.0281427	ABCD2		ENSG00000151164	77.7322	0.820093	0.206444	3.97247	7.11e-05	0.000223025	RAD9B
ENSG00000157782	25.0898	-2.81317	0.388447	-7.2421	4.42e-13	2.63e-12	CABP1		ENSG00000137393	382.914	0.82043	0.0927928	8.84153	9.44e-19	7.57e-18	RNF144B
ENSG00000189292	10.9146	-2.81299	0.628953	-4.47249	7.73e-06	2.67e-05	ALKAL2		ENSG00000141524	4771.36	0.820865	0.0583591	14.0657	6.17e-45	1.27e-43	TMC6
ENSG00000185291	30.9423	-2.81233	0.351257	-8.00649	1.18e-15	8.11e-15	IL3RA		ENSG00000241685	8970.91	0.8212	0.0482511	17.0193	5.9e-65	2.06e-63	ARPC1A
ENSG00000148680	9.15092	-2.8117	0.661499	-4.25049	2.13e-05	7.06e-05	HTR7		ENSG00000173727	145.4	0.821293	0.170273	4.8234	1.41e-06	5.24e-06	AP000769.1
ENSG00000259834	18.4354	-2.80463	0.464611	-6.03651	1.57e-09	7.38e-09	AL365361.1		ENSG00000136048	587.108	0.821433	0.07747	10.6032	2.88e-26	3.24e-25	DRAM1
ENSG00000189229	3.63876	-2.80244	1.00992	-2.77492	0.00552153	0.0134413	AC069277.1		ENSG00000093072	59.5525	0.821553	0.22234	3.69503	0.000219858	0.000648372	ADA2
ENSG00000134532	9.13132	-2.80239	0.634895	-4.41395	1.01e-05	3.47e-05	SOX5		ENSG00000228549	21.7083	0.821626	0.353108	2.32684	0.0199737	0.0433999	BX284668.2
ENSG00000188897	133.388	-2.80061	0.189069	-14.8127	1.21e-49	2.89e-48	AC099489.1		ENSG00000210196	914.547	0.82174	0.0965148	8.51414	1.68e-17	1.27e-16	MT-TP
ENSG00000099139	96.5466	-2.8	0.213198	-13.1333	2.12e-39	3.74e-38	PCSK5		ENSG00000262768	113.637	0.822064	0.158178	5.19708	2.02e-07	8.12e-07	AC100791.2
ENSG00000261353	5.06248	-2.79903	0.844186	-3.31565	0.000914301	0.00249479	#N/A		ENSG00000130702	6534.86	0.822123	0.0749538	10.9684	5.42e-28	6.54e-27	LAMA5
ENSG00000250742	223.123	-2.79869	0.134078	-20.8737	9.29e-97	6.17e-95	LINC02381		ENSG00000215386	905.632	0.822183	0.0844485	9.73591	2.12e-22	2.01e-21	MIR99AHG
ENSG00000180287	3.28798	-2.79857	1.071	-2.61304	0.00897404	0.0210051	PLD5		ENSG00000267281	21.4881	0.822568	0.341951	2.40552	0.0161497	0.0358822	ATF7-NPFF
ENSG00000122592	36.995	-2.79766	0.311401	-8.98411	2.61e-19	2.14e-18	HOXA7		ENSG00000213185	55.2017	0.823151	0.214804	3.8321	0.000127054	0.000386931	FAM24B
ENSG00000155974	98.5843	-2.79745	0.212483	-13.1655	1.39e-39	2.45e-38	GRIP1		ENSG00000187556	170.838	0.823293	0.139949	5.88279	4.03e-09	1.84e-08	NANOS3
ENSG00000127252	30.2151	-2.79571	0.360578	-7.75341	8.95e-15	5.86e-14	PLAAT1		ENSG00000258590	583.57	0.823491	0.0971912	8.4729	2.39e-17	1.8e-16	NBEAP1
ENSG00000259953	21.0705	-2.79549	0.434242	-6.43764	1.21e-10	6.19e-10	AL138756.1		ENSG00000099337	110.164	0.823686	0.180351	4.56712	4.94e-06	1.75e-05	KCNK6
ENSG00000178726	5.64289	-2.79456	0.943987	-2.96038	0.00307264	0.00776948	THBD		ENSG00000069974	620.98	0.824253	0.095591	8.62271	6.54e-18	5.04e-17	RAB27A
ENSG00000171488	130.787	-2.7918	0.175657	-15.8935	7.03e-57	2.02e-55	LRRC8C		ENSG00000230953	60.3896	0.824349	0.20355	4.04986	5.12e-05	0.000163406	AC099677.1
ENSG00000082397	446.896	-2.79175	0.103931	-26.8615	6.19e-159	1.1e-156	EPB41L3		ENSG00000273565	18.9864	0.824351	0.360004	2.28984	0.0220305	0.0474194	AL691403.2
ENSG00000183196	20.6175	-2.78978	0.447501	-6.23412	4.54e-10	2.22e-09	CHST6		ENSG00000173141	5398.95	0.824379	0.056151	14.6815	8.47e-49	1.97e-47	MRPL57
ENSG00000169851	138.747	-2.78919	0.16448	-16.9577	1.69e-64	5.83e-63	PCDH7		ENSG00000221923	93.328	0.824404	0.213985	3.85263	0.000116855	0.000357497	ZNF880
ENSG00000196368	216.383	-2.78746	0.145457	-19.1635	7.47e-82	3.74e-80	NUDT11		ENSG00000183598	83.4593	0.824467	0.182036	4.52915	5.92e-06	2.07e-05	HIST2H3D
ENSG00000068366	363.925	-2.78583	0.123062	-22.6376	1.85e-113	1.63e-111	ACSL4		ENSG00000272829	39.796	0.825126	0.255527	3.22912	0.00124174	0.00332845	AC002470.1
ENSG00000071575	103.584	-2.78485	0.203285	-13.6993	1.03e-42	1.99e-41	TRIB2		ENSG00000108375	122.856	0.825358	0.184106	4.48307	7.36e-06	2.55e-05	RNF43
ENSG00000150627	104.381	-2.78453	0.211269	-13.18	1.14e-39	2.04e-38	WDR17		ENSG00000160179	456.925	0.825375	0.0984474	8.38391	5.12e-17	3.78e-16	ABCG1
ENSG00000253552	51.5698	-2.78373	0.307291	-9.05893	1.32e-19	1.1e-18	HOXA-AS2		ENSG00000127241	27.3226	0.825524	0.324647	2.54284	0.0109957	0.0253189	MASP1
ENSG00000226786	9.43177	-2.78098	0.622173	-4.46979	7.83e-06	2.71e-05	#N/A		ENSG00000172482	473.552	0.825607	0.10117	8.16062	3.33e-16	2.35e-15	AGXT
ENSG00000265763	24.8376	-2.7802	0.393253	-7.06976	1.55e-12	8.97e-12	ZNF488		ENSG00000104154	3767.61	0.825633	0.054318	15.2	3.54e-52	9.11e-51	SLC30A4
ENSG00000133789	234.405	-2.78003	0.138059	-20.1365	3.53e-90	2.1e-88	SWAP70		ENSG00000108448	974.61	0.826355	0.0730083	11.3186	1.06e-29	1.36e-28	TRIM16L
ENSG00000258789	6.81007	-2.77982	0.789364	-3.52159	0.000428968	0.00122256	AL162171.1		ENSG00000242798	28.0824	0.827074	0.327631	2.5244	0.0115895	0.0265638	AC073842.2
ENSG00000248309	6.08105	-2.77786	0.792942	-3.50324	0.000459643	0.00130443	MEF2C-AS1		ENSG00000250999	34.6235	0.827782	0.340083	2.43406	0.0149305	0.033441	AC136604.3
ENSG00000125430	178.979	-2.7777	0.152868	-18.1705	8.84e-74	3.73e-72	HS3ST3B1		ENSG00000162552	48.7046	0.828313	0.229144	3.61482	0.000300559	0.000872785	WNT4
ENSG00000138193	217.479	-2.77742	0.137311	-20.2272	5.64e-91	3.39e-89	PLCE1		ENSG00000181016	74.4743	0.828422	0.191315	4.33014	1.49e-05	5.01e-05	LSMEM1
ENSG00000117707	64.779	-2.77469	0.236137	-11.7503	7.04e-32	9.8e-31	PROX1		ENSG00000243364	453.103	0.828631	0.0894554	9.26306	1.99e-20	1.71e-19	EFNA4
ENSG00000115935	173.658	-2.77418	0.156809	-17.6914	4.88e-70	1.89e-68	WIPF1		ENSG00000109610	52.7442	0.828919	0.304749	2.72001	0.00652805	0.0156804	SOD3
ENSG00000184515	139.222	-2.77309	0.235917	-11.7545	6.69e-32	9.34e-31	BEX5		ENSG00000259129	153.849	0.829917	0.135987	6.10292	1.04e-09	4.96e-09	LINC00648
ENSG00000251493	176.255	-2.77158	0.166852	-16.6111	5.8e-62	1.86e-60	FOXD1		ENSG00000182648	1612.41	0.830533	0.057207	14.518	9.31e-48	2.1e-46	LINC01006
ENSG00000245648	14.4416	-2.77112	0.523848	-5.28994	1.22e-07	4.99e-07	AC022075.1		ENSG00000126217	1270.3	0.830777	0.0574358	14.4644	2.03e-47	4.56e-46	MCF2L
ENSG00000134595	6.34202	-2.77075	0.795217	-3.48426	0.000493491	0.00139416	SOX3		ENSG00000283078	35.126	0.831616	0.336058	2.47462	0.0133379	0.0301887	AL137077.2
ENSG00000105255	185.157	-2.77061	0.144361	-19.1922	4.3e-82	2.17e-80	FSD1		ENSG00000226887	336.799	0.832566	0.13166	6.32363	2.55e-10	1.27e-09	ERVMER34-1
ENSG00000186300	58.7962	-2.7702	0.262299	-10.5612	4.51e-26	5.03e-25	ZNF555		ENSG00000277559	58.1676	0.832686	0.240889	3.45672	0.000546795	0.00153293	AC018553.1
ENSG00000174640	28.2147	-2.76871	0.379742	-7.29103	3.08e-13	1.85e-12	SLCO2A1		ENSG00000142273	274.802	0.833376	0.109888	7.58383	3.35e-14	2.13e-13	CBLC
ENSG00000179855	54.3101	-2.76854	0.307158	-9.01342	2e-19	1.65e-18	GIPC3		ENSG00000102032	135.73	0.833443	0.15163	5.49656	3.87e-08	1.65e-07	RENBP
ENSG00000164330	9.97606	-2.7682	0.625037	-4.42885	9.47e-06	3.25e-05	EBF1		ENSG00000272599	21.6647	0.833642	0.336399	2.47814	0.0132071	0.0299222	AC016394.2
ENSG00000279873	27.463	-2.76768	0.379989	-7.2836	3.25e-13	1.95e-12	LINC01126		ENSG00000123091	4050.66	0.833816	0.0394339	21.1446	3.09e-99	2.15e-97	RNF11
ENSG00000126970	187.566	-2.76677	0.144909	-19.0932	2.88e-81	1.43e-79	ZC4H2		ENSG00000197536	113.252	0.834005	0.165234	5.04742	4.48e-07	1.75e-06	C5orf56
ENSG00000175879	83.6199	-2.76583	0.220093	-12.5666	3.22e-36	5.13e-35	HOXD8		ENSG00000115183	4653.75	0.834646	0.0445938	18.7166	3.62e-78	1.68e-76	TANC1
ENSG00000158486	8.2032	-2.76572	0.785054	-3.52297	0.000426747	0.00121698	DNAH3		ENSG00000153237	54.9677	0.834891	0.272233	3.06683	0.00216345	0.00558874	CCDC148
ENSG00000172379	431.677	-2.76542	0.101023	-27.3742	5.57e-165	1.04e-162	ARNT2		ENSG00000247516	329.401	0.834951	0.122085	6.8391	7.97e-12	4.41e-11	MIR4458HG
ENSG00000082175	17.1036	-2.76524	0.436991	-6.3279	2.49e-10	1.24e-09	PGR		ENSG00000258884	35.1624	0.835839	0.265211	3.1516	0.00162378	0.00427662	LINC02321
ENSG00000125895	91.5324	-2.76395	0.216858	-12.7455	3.3e-37	5.45e-36	TMEM74B		ENSG00000110719	908.971	0.836443	0.0751727	11.127	9.28e-29	1.15e-27	TCIRG1
ENSG00000282381	9.53534	-2.76257	0.61723	-4.47575	7.61e-06	2.64e-05	AC104073.4		ENSG00000203814	493.779	0.836631	0.0795693	10.5145	7.41e-26	8.2e-25	HIST2H2BF
ENSG00000144857	175.291	-2.762	0.142661	-19.3606	1.66e-83	8.67e-82	BOC		ENSG00000237357	39.1455	0.836863	0.282133	2.9662	0.00301505	0.00763652	BX088651.4
ENSG00000074047	115.03	-2.7614	0.196952	-14.0207	1.17e-44	2.39e-43	GLI2		ENSG00000198046	37.8959	0.837503	0.27132	3.08677	0.00202342	0.00525466	ZNF667
ENSG00000048052	10.7802	-2.7589	0.655592	-4.20826	2.57e-05	8.46e-05	HDAC9		ENSG00000008517	775.175	0.837589	0.0877043	9.55015	1.3e-21	1.18e-20	IL32
ENSG00000018408	207.832	-2.75528	0.140285	-19.6406	6.95e-86	3.76e-84	WWTR1		ENSG00000147697	38.7984	0.83787	0.252536	3.31782	0.000907233	0.00247625	GSDMC
ENSG00000184156	51.5698	-2.75491	0.262097	-10.511	7.69e-26	8.5e-25	KCNQ3		ENSG00000235029	46.3561	0.83811	0.258242	3.24544	0.00117268	0.00315535	MNX1-AS2
ENSG00000145284	100.675	-2.75424	0.186152	-14.7956	1.56e-49	3.72e-48	SCD5		ENSG00000108786	382.788	0.838243	0.0930111	9.01229	2.02e-19	1.67e-18	HSD17B1
ENSG00000157570	90.4397	-2.75385	0.206561	-13.3319	1.51e-40	2.76e-39	TSPAN18		ENSG00000271430	148.449	0.838321	0.138665	6.04566	1.49e-09	7e-09	#N/A
ENSG00000170689	1973.41	-2.75343	0.055465	-49.6427	0	0	HOXB9		ENSG00000106003	287.451	0.838786	0.0959883	8.73842	2.36e-18	1.86e-17	LFNG
ENSG00000148053	7.52666	-2.75295	0.72082	-3.81919	0.000133893	0.000406366	NTRK2		ENSG00000166839	356.291	0.839144	0.0968117	8.66779	4.41e-18	3.42e-17	ANKDD1A
ENSG00000225280	4.40177	-2.75118	0.996	-2.76223	0.00574086	0.0139283	AL158013.1		ENSG00000241990	116.511	0.840038	0.182995	4.59049	4.42e-06	1.57e-05	PRR34-AS1
ENSG00000180660	9.36164	-2.75083	0.587946	-4.67871	2.89e-06	1.04e-05	MAB21L1		ENSG00000261150	900.15	0.840294	0.0783908	10.7193	8.26e-27	9.54e-26	EPPK1
ENSG00000280202	22.1722	-2.75017	0.442065	-6.2212	4.93e-10	2.4e-09	AC005831.1		ENSG00000242622	140.511	0.840498	0.14802	5.67825	1.36e-08	5.97e-08	AC092910.3
ENSG00000116031	8.22227	-2.74981	0.705587	-3.8972	9.73e-05	0.000300481	CD207		ENSG00000174939	903.55	0.840702	0.0875626	9.60115	7.91e-22	7.31e-21	ASPHD1
ENSG00000207697	2.94148	-2.74827	1.17908	-2.33086	0.0197605	0.0429708	MIR573		ENSG00000182195	1857.36	0.840963	0.0857282	9.80964	1.02e-22	9.91e-22	LDOC1
ENSG00000089558	7.55994	-2.74802	0.705262	-3.89645	9.76e-05	0.000301314	KCNH4		ENSG00000174428	673.879	0.84104	0.107123	7.85117	4.12e-15	2.75e-14	GTF2IRD2B
ENSG00000198075	10.9032	-2.74622	0.66209	-4.14781	3.36e-05	0.000109066	SULT1C4		ENSG00000258940	116.389	0.841325	0.171918	4.89375	9.89e-07	3.73e-06	AL132639.2
ENSG00000187690	2.99266	-2.7453	1.16984	-2.34674	0.0189387	0.0413438	EZHIP		ENSG00000091986	235.378	0.841422	0.118401	7.10655	1.19e-12	6.9e-12	CCDC80
ENSG00000099284	910.581	-2.74231	0.0801265	-34.2247	1.04e-256	6.06e-254	H2AFY2		ENSG00000147174	64.4596	0.841717	0.248155	3.39191	0.000694079	0.00192193	GCNA
ENSG00000126016	2513.13	-2.74198	0.0587576	-46.666	0	0	AMOT		ENSG00000268584	90.5024	0.841919	0.183197	4.59572	4.31e-06	1.53e-05	AC073389.1
ENSG00000149575	15.0081	-2.74117	0.493407	-5.5556	2.77e-08	1.19e-07	SCN2B		ENSG00000006282	5082.46	0.841943	0.0458347	18.3691	2.32e-75	1.01e-73	SPATA20
ENSG00000279355	8.19145	-2.74092	0.655032	-4.1844	2.86e-05	9.35e-05	#N/A		ENSG00000135596	2003.26	0.842213	0.0773744	10.8849	1.36e-27	1.62e-26	MICAL1
ENSG00000050030	27.7688	-2.74023	0.373255	-7.34144	2.11e-13	1.28e-12	NEXMIF		ENSG00000049759	5399.22	0.842315	0.0481786	17.4832	1.93e-68	7.18e-67	NEDD4L
ENSG00000179399	9.14395	-2.7398	0.751225	-3.64711	0.000265205	0.000774622	GPC5		ENSG00000253598	71.1271	0.842373	0.207993	4.05001	5.12e-05	0.00016334	SLC10A5
ENSG00000134207	22.803	-2.7385	0.402736	-6.79974	1.05e-11	5.75e-11	SYT6		ENSG00000153132	5010.67	0.842719	0.0849913	9.91536	3.57e-23	3.53e-22	CLGN
ENSG00000160161	96.2932	-2.73721	0.219718	-12.4578	1.27e-35	1.99e-34	CILP2		ENSG00000025708	1367.4	0.843122	0.0647318	13.0249	8.84e-39	1.53e-37	TYMP
ENSG00000184384	27.858	-2.73709	0.349198	-7.83824	4.57e-15	3.04e-14	MAML2		ENSG00000146707	221.731	0.84372	0.113293	7.44727	9.53e-14	5.91e-13	POMZP3
ENSG00000184226	435.608	-2.73453	0.0950211	-28.7781	4.03e-182	9.72e-180	PCDH9		ENSG00000275234	443.872	0.843914	0.0948053	8.90155	5.51e-19	4.46e-18	AC010503.4
ENSG00000152315	5.59245	-2.73079	0.81419	-3.35399	0.000796542	0.00219087	KCNK13		ENSG00000113494	73.9173	0.844464	0.231746	3.64393	0.000268511	0.000783697	PRLR
ENSG00000151388	26.0572	-2.73054	0.393878	-6.93246	4.14e-12	2.33e-11	ADAMTS12		ENSG00000230882	194.205	0.844473	0.209931	4.02262	5.76e-05	0.000182389	AC005077.4
ENSG00000270030	12.961	-2.72886	0.565147	-4.82859	1.38e-06	5.11e-06	AC136475.7		ENSG00000126460	335.246	0.845394	0.117586	7.18956	6.5e-13	3.84e-12	PRRG2
ENSG00000172985	139.619	-2.72818	0.169493	-16.0961	2.71e-58	7.95e-57	SH3RF3		ENSG00000217801	364.62	0.845576	0.118719	7.1225	1.06e-12	6.17e-12	AL390719.1
ENSG00000123388	85.0648	-2.72813	0.228978	-11.9143	9.96e-33	1.42e-31	HOXC11		ENSG00000105854	2402.21	0.846188	0.0413382	20.4699	4e-93	2.5e-91	PON2
ENSG00000261377	21.3158	-2.72755	0.424879	-6.41958	1.37e-10	6.93e-10	PDCD6IPP2		ENSG00000233221	93.0356	0.846219	0.190486	4.44242	8.9e-06	3.06e-05	AC133785.1
ENSG00000182985	431.076	-2.72751	0.0986569	-27.6464	3.08e-168	6.05e-166	CADM1		ENSG00000167614	84.6979	0.846329	0.209381	4.04205	5.3e-05	0.000168632	TTYH1
ENSG00000189410	29.471	-2.72276	0.354332	-7.68419	1.54e-14	9.92e-14	SH2D5		ENSG00000154803	1231.86	0.846909	0.0557148	15.2008	3.49e-52	9.01e-51	FLCN
ENSG00000259863	18.9727	-2.72182	0.422803	-6.43754	1.21e-10	6.19e-10	SH3RF3-AS1		ENSG00000139865	2174.72	0.847419	0.089517	9.46656	2.89e-21	2.6e-20	TTC6
ENSG00000153993	41.9298	-2.71892	0.284848	-9.54516	1.36e-21	1.24e-20	SEMA3D		ENSG00000179082	48.3368	0.848109	0.223983	3.78648	0.000152797	0.000459879	C9orf106
ENSG00000145029	147.186	-2.71711	0.171603	-15.8337	1.82e-56	5.17e-55	NICN1		ENSG00000233392	539.152	0.848328	0.104794	8.09523	5.72e-16	3.99e-15	AC104809.2
ENSG00000136425	66.4681	-2.71665	0.239163	-11.359	6.69e-30	8.64e-29	CIB2		ENSG00000277938	55.7524	0.848614	0.229782	3.69313	0.000221513	0.000653113	AL035252.3
ENSG00000174371	899.788	-2.71658	0.0767799	-35.3814	3.3e-274	2.45e-271	EXO1		ENSG00000152620	3949.12	0.849345	0.0415344	20.4492	6.11e-93	3.8e-91	NADK2
ENSG00000026025	1493.01	-2.71557	0.0779499	-34.8373	6.62e-266	4.23e-263	VIM		ENSG00000166394	146.774	0.849617	0.149536	5.6817	1.33e-08	5.86e-08	CYB5R2
ENSG00000170454	4.0185	-2.71487	0.948759	-2.86149	0.0042165	0.0104674	KRT75		ENSG00000049246	594.009	0.849633	0.0975625	8.7086	3.08e-18	2.4e-17	PER3
ENSG00000137331	15.991	-2.71334	0.461638	-5.87763	4.16e-09	1.9e-08	IER3		ENSG00000230658	68.1175	0.849749	0.234841	3.61841	0.000296423	0.000861323	KLHL7-DT
ENSG00000182168	116.188	-2.7123	0.17692	-15.3307	4.77e-53	1.25e-51	UNC5C		ENSG00000135378	1670.32	0.850015	0.0544336	15.6156	5.7e-55	1.56e-53	PRRG4
ENSG00000137959	2.79228	-2.71076	1.12582	-2.4078	0.0160489	0.0356699	IFI44L		ENSG00000011677	225.492	0.850727	0.121991	6.97369	3.09e-12	1.75e-11	GABRA3
ENSG00000106648	3.44262	-2.71056	1.06794	-2.53811	0.0111453	0.0256397	GALNTL5		ENSG00000138413	20815	0.851195	0.0461725	18.4351	6.87e-76	3.04e-74	IDH1
ENSG00000138792	12.5003	-2.71044	0.544216	-4.98046	6.34e-07	2.44e-06	ENPEP		ENSG00000206077	165.937	0.851252	0.133758	6.36413	1.96e-10	9.87e-10	ZDHHC11B
ENSG00000119508	21.5099	-2.70644	0.436326	-6.20279	5.55e-10	2.69e-09	NR4A3		ENSG00000213279	221.368	0.851529	0.129147	6.59347	4.3e-11	2.26e-10	Z97192.2
ENSG00000167779	7.78999	-2.70209	0.738125	-3.66075	0.00025148	0.000737197	IGFBP6		ENSG00000272853	126.386	0.85196	0.17033	5.00183	5.68e-07	2.19e-06	AC069544.1
ENSG00000151778	19.4267	-2.69903	0.407261	-6.62727	3.42e-11	1.81e-10	SERP2		ENSG00000165476	3327.16	0.853053	0.0444345	19.198	3.85e-82	1.95e-80	REEP3
ENSG00000176406	14.0506	-2.69903	0.544065	-4.96086	7.02e-07	2.68e-06	RIMS2		ENSG00000162241	1009.06	0.853117	0.0619593	13.769	3.92e-43	7.67e-42	SLC25A45
ENSG00000156535	167.792	-2.69737	0.163261	-16.5218	2.56e-61	8.06e-60	CD109		ENSG00000214433	32.419	0.853382	0.315624	2.70379	0.0068553	0.016402	GOLGA2P8
ENSG00000255010	2.26314	-2.69721	1.17229	-2.30081	0.0214025	0.046187	AP001767.2		ENSG00000258920	276.601	0.853491	0.143079	5.96518	2.44e-09	1.13e-08	FOXN3-AS1
ENSG00000157833	151.1	-2.69689	0.158896	-16.9727	1.31e-64	4.53e-63	GAREM2		ENSG00000168000	187.422	0.853829	0.131765	6.47993	9.18e-11	4.72e-10	BSCL2
ENSG00000159714	110.386	-2.69552	0.176234	-15.2951	8.24e-53	2.16e-51	ZDHHC1		ENSG00000257660	43.3998	0.854452	0.312286	2.73612	0.00621686	0.0149867	ADCY6-DT
ENSG00000176597	78.6436	-2.69531	0.208016	-12.9572	2.14e-38	3.67e-37	B3GNT5		ENSG00000215014	73.0509	0.854659	0.236264	3.61739	0.000297586	0.000864518	AL645728.1
ENSG00000116678	190.843	-2.69425	0.156501	-17.2155	2.03e-66	7.32e-65	LEPR		ENSG00000090339	430.38	0.855531	0.119759	7.14379	9.08e-13	5.3e-12	ICAM1
ENSG00000261051	4.80349	-2.69141	0.906744	-2.96822	0.00299534	0.00759149	AC107021.2		ENSG00000183734	286.294	0.855873	0.100182	8.54317	1.31e-17	9.93e-17	ASCL2
ENSG00000279092	9.49502	-2.68814	0.622496	-4.31833	1.57e-05	5.28e-05	AC025678.3		ENSG00000228451	79.4261	0.855878	0.200575	4.26712	1.98e-05	6.59e-05	SDAD1P1
ENSG00000255328	9.93847	-2.6859	0.664676	-4.04092	5.32e-05	0.000169407	AC136475.5		ENSG00000106327	562.647	0.856015	0.0851048	10.0584	8.44e-24	8.55e-23	TFR2
ENSG00000109738	40.6033	-2.68569	0.31031	-8.65486	4.94e-18	3.82e-17	GLRB		ENSG00000281566	28.0184	0.856067	0.360565	2.37424	0.0175853	0.0387206	AL157778.1
ENSG00000196628	186.45	-2.68272	0.139997	-19.1628	7.57e-82	3.79e-80	TCF4		ENSG00000080224	480.739	0.856139	0.0824633	10.3821	2.99e-25	3.21e-24	EPHA6
ENSG00000237523	21.4672	-2.68217	0.396302	-6.76799	1.31e-11	7.11e-11	LINC00857		ENSG00000119655	1041.87	0.856401	0.0873081	9.80895	1.03e-22	9.97e-22	NPC2
ENSG00000115641	88.4894	-2.68072	0.197655	-13.5626	6.67e-42	1.27e-40	FHL2		ENSG00000166145	5403.22	0.856425	0.0801699	10.6826	1.23e-26	1.41e-25	SPINT1
ENSG00000125337	14.8375	-2.6753	0.636849	-4.20083	2.66e-05	8.72e-05	KIF25		ENSG00000265660	118.349	0.856513	0.165436	5.17732	2.25e-07	9e-07	MIR4664
ENSG00000177551	39.8147	-2.67425	0.326798	-8.1832	2.76e-16	1.95e-15	NHLH2		ENSG00000215067	69.0355	0.856648	0.198335	4.31919	1.57e-05	5.26e-05	ALOX12-AS1
ENSG00000262999	3.50488	-2.67425	1.02074	-2.61991	0.00879532	0.0206184	AC099489.3		ENSG00000090013	3998.85	0.856894	0.0551776	15.5297	2.18e-54	5.89e-53	BLVRB
ENSG00000162520	9.24811	-2.67357	0.737512	-3.62512	0.000288823	0.000840483	SYNC		ENSG00000204659	58.5545	0.857032	0.256677	3.33895	0.000840955	0.0023045	CBY3
ENSG00000183778	38.4907	-2.67036	0.311192	-8.58109	9.4e-18	7.18e-17	B3GALT5		ENSG00000277693	73.641	0.857651	0.203039	4.22407	2.4e-05	7.91e-05	AP003900.1
ENSG00000148655	10.5595	-2.66979	0.618459	-4.31684	1.58e-05	5.31e-05	LRMDA		ENSG00000004848	100.911	0.857907	0.181638	4.72316	2.32e-06	8.45e-06	ARX
ENSG00000128606	5.47536	-2.66959	0.803966	-3.32053	0.000898462	0.00245352	LRRC17		ENSG00000234817	24.8003	0.858189	0.335616	2.55706	0.0105562	0.0243805	AL136309.2
ENSG00000110786	6.53878	-2.66787	0.776577	-3.43542	0.000591626	0.00165322	PTPN5		ENSG00000175893	1146.01	0.858604	0.0603868	14.2184	7.04e-46	1.5e-44	ZDHHC21
ENSG00000142149	162.385	-2.6665	0.157798	-16.8982	4.64e-64	1.57e-62	HUNK		ENSG00000233006	211.912	0.858704	0.111859	7.67668	1.63e-14	1.05e-13	MIR3936HG
ENSG00000254427	8.21077	-2.66506	0.66184	-4.02674	5.66e-05	0.000179476	LINC02696		ENSG00000159214	403.659	0.860019	0.101872	8.44216	3.12e-17	2.32e-16	CCDC24
ENSG00000169855	746.955	-2.66436	0.0839522	-31.7366	4.86e-221	1.83e-218	ROBO1		ENSG00000010438	66.7311	0.860582	0.2019	4.26242	2.02e-05	6.71e-05	PRSS3
ENSG00000111886	2.45639	-2.66303	1.1212	-2.37516	0.0175413	0.0386402	GABRR2		ENSG00000229056	87.3871	0.86074	0.315796	2.72562	0.00641809	0.0154433	HECW2-AS1
ENSG00000050767	57.0066	-2.66273	0.263288	-10.1134	4.82e-24	4.93e-23	COL23A1		ENSG00000261069	133.32	0.86094	0.152564	5.64315	1.67e-08	7.28e-08	AC124312.3
ENSG00000123685	57.5245	-2.66028	0.306028	-8.69291	3.53e-18	2.76e-17	BATF3		ENSG00000166816	2409.9	0.860945	0.05884	14.632	1.76e-48	4.07e-47	LDHD
ENSG00000104044	21.5476	-2.66008	0.407692	-6.52473	6.81e-11	3.53e-10	OCA2		ENSG00000049283	1783.5	0.86131	0.0800912	10.7541	5.67e-27	6.57e-26	EPN3
ENSG00000104870	121.236	-2.6595	0.20383	-13.0476	6.55e-39	1.14e-37	FCGRT		ENSG00000215105	227.171	0.861893	0.150487	5.72735	1.02e-08	4.52e-08	TTC3P1
ENSG00000056558	78.4892	-2.65859	0.20976	-12.6744	8.2e-37	1.33e-35	TRAF1		ENSG00000231982	149.868	0.862085	0.151759	5.68063	1.34e-08	5.89e-08	AC112907.2
ENSG00000204653	17.4647	-2.65808	0.470273	-5.65221	1.58e-08	6.91e-08	ASPDH		ENSG00000269313	415.477	0.862318	0.0973449	8.85838	8.12e-19	6.53e-18	MAGIX
ENSG00000116396	96.0394	-2.65564	0.197784	-13.427	4.2e-41	7.87e-40	KCNC4		ENSG00000102890	1601.45	0.864158	0.0595598	14.5091	1.06e-47	2.39e-46	ELMO3
ENSG00000103241	73.3683	-2.65547	0.21634	-12.2745	1.24e-34	1.88e-33	FOXF1		ENSG00000153064	94.8089	0.864171	0.187431	4.6106	4.02e-06	1.43e-05	BANK1
ENSG00000143248	131.617	-2.65286	0.183647	-14.4454	2.68e-47	5.98e-46	RGS5		ENSG00000159208	164.521	0.864457	0.151234	5.71601	1.09e-08	4.82e-08	CIART
ENSG00000154721	54.4932	-2.65219	0.268256	-9.88679	4.75e-23	4.66e-22	JAM2		ENSG00000175463	252.54	0.865076	0.115511	7.48912	6.93e-14	4.33e-13	TBC1D10C
ENSG00000102109	275.01	-2.65103	0.14467	-18.3247	5.26e-75	2.28e-73	PCSK1N		ENSG00000272277	40.2885	0.865876	0.313655	2.7606	0.00576954	0.013988	AL031963.3
ENSG00000107099	116.159	-2.65004	0.26005	-10.1905	2.19e-24	2.27e-23	DOCK8		ENSG00000227543	45.2571	0.866735	0.290727	2.98127	0.0028706	0.00729282	SPAG5-AS1
ENSG00000015520	5.61629	-2.64861	0.762634	-3.47298	0.000514716	0.0014495	NPC1L1		ENSG00000240970	49.0213	0.866809	0.23693	3.65851	0.000253688	0.000743196	RPL23AP64
ENSG00000174498	37.4417	-2.64542	0.400764	-6.60093	4.09e-11	2.15e-10	IGDCC3		ENSG00000255337	22.1263	0.866842	0.334358	2.59255	0.00952661	0.0221798	AP001830.1
ENSG00000277954	3.21828	-2.6452	1.05508	-2.50711	0.0121723	0.0277908	AC092376.2		ENSG00000223756	490.24	0.86686	0.103248	8.39589	4.62e-17	3.42e-16	TSSC2
ENSG00000164076	75.4156	-2.64452	0.241228	-10.9627	5.77e-28	6.95e-27	CAMKV		ENSG00000136147	271.628	0.866917	0.0993507	8.72582	2.64e-18	2.07e-17	PHF11
ENSG00000181690	135.486	-2.64399	0.166712	-15.8597	1.21e-56	3.43e-55	PLAG1		ENSG00000130940	1793.45	0.866994	0.0668189	12.9753	1.69e-38	2.91e-37	CASZ1
ENSG00000180626	175.085	-2.64308	0.160195	-16.4992	3.72e-61	1.16e-59	ZNF594		ENSG00000196091	322.507	0.867011	0.281839	3.07626	0.00209615	0.00543071	MYBPC1
ENSG00000121318	3.87752	-2.6426	1.0417	-2.53681	0.0111867	0.0257286	TAS2R10		ENSG00000274272	97.4017	0.867102	0.18165	4.77348	1.81e-06	6.65e-06	AC069281.2
ENSG00000281103	11.4541	-2.64251	0.653283	-4.04498	5.23e-05	0.000166654	TRG-AS1		ENSG00000167895	60.6146	0.867124	0.22972	3.77471	0.000160195	0.000480882	TMC8
ENSG00000178860	5.25556	-2.64077	0.935513	-2.82281	0.00476055	0.0117238	MSC		ENSG00000204282	588.113	0.868007	0.0804117	10.7945	3.65e-27	4.27e-26	TNRC6C-AS1
ENSG00000198732	186.319	-2.64065	0.141342	-18.6827	6.85e-78	3.16e-76	SMOC1		ENSG00000172508	419.205	0.868045	0.0914025	9.49695	2.16e-21	1.95e-20	CARNS1
ENSG00000144057	8.97246	-2.63971	0.68048	-3.87919	0.000104805	0.000322247	ST6GAL2		ENSG00000163235	85.1807	0.868263	0.223409	3.88644	0.000101726	0.000313163	TGFA
ENSG00000183775	10.0803	-2.63872	0.646016	-4.08461	4.42e-05	0.000141946	KCTD16		ENSG00000211459	42579.5	0.868856	0.0672812	12.9138	3.76e-38	6.39e-37	MT-RNR1
ENSG00000179071	14.2657	-2.63752	0.579543	-4.55103	5.34e-06	1.88e-05	CCDC89		ENSG00000100842	768.616	0.869162	0.0889719	9.76895	1.53e-22	1.47e-21	EFS
ENSG00000169116	72.2367	-2.6358	0.259188	-10.1695	2.71e-24	2.8e-23	PARM1		ENSG00000163814	1318.71	0.869981	0.0729292	11.9291	8.35e-33	1.19e-31	CDCP1
ENSG00000100206	149.612	-2.63537	0.161823	-16.2854	1.25e-59	3.8e-58	DMC1		ENSG00000124215	598.681	0.870259	0.0846341	10.2826	8.44e-25	8.9e-24	CDH26
ENSG00000164107	17.7729	-2.6345	0.416911	-6.31911	2.63e-10	1.31e-09	HAND2		ENSG00000131584	2905.38	0.870424	0.0615758	14.1358	2.28e-45	4.78e-44	ACAP3
ENSG00000269226	5.39186	-2.63239	1.01075	-2.60438	0.00920407	0.0214978	TMSB15B		ENSG00000134962	49.6344	0.870494	0.249578	3.48787	0.000486888	0.00137635	KLB
ENSG00000105880	17.5223	-2.63165	0.422048	-6.23542	4.51e-10	2.2e-09	DLX5		ENSG00000132938	34.484	0.870624	0.296497	2.93636	0.00332086	0.00836023	MTUS2
ENSG00000144369	112.031	-2.63141	0.174528	-15.0773	2.29e-51	5.72e-50	FAM171B		ENSG00000167470	3103.01	0.870668	0.0589613	14.7668	2.4e-49	5.69e-48	MIDN
ENSG00000244056	3.22727	-2.6287	1.15029	-2.28525	0.0222982	0.0479467	RN7SL417P		ENSG00000259826	63.7017	0.8707	0.221722	3.927	8.6e-05	0.000267454	AC072061.1
ENSG00000140859	155.992	-2.62745	0.154096	-17.0507	3.45e-65	1.21e-63	KIFC3		ENSG00000099866	64.1059	0.870852	0.2035	4.27938	1.87e-05	6.25e-05	MADCAM1
ENSG00000203650	4.1929	-2.62661	0.939362	-2.79617	0.00517129	0.0126548	LINC01285		ENSG00000244300	1902.69	0.871026	0.0468299	18.5998	3.23e-77	1.47e-75	GATA2-AS1
ENSG00000152804	49.9573	-2.62616	0.269099	-9.75908	1.69e-22	1.61e-21	HHEX		ENSG00000267244	57.9332	0.872058	0.214422	4.06702	4.76e-05	0.000152607	AC012615.6
ENSG00000183484	4.27314	-2.6254	0.932678	-2.81491	0.00487914	0.0119879	GPR132		ENSG00000165091	29.0128	0.87283	0.35049	2.49031	0.012763	0.0290358	TMC1
ENSG00000205763	42.0108	-2.62351	0.318999	-8.2242	1.97e-16	1.41e-15	RP9P		ENSG00000270761	50.786	0.872858	0.252203	3.46094	0.000538292	0.0015111	AL355353.1
ENSG00000273274	57.3806	-2.622	0.243083	-10.7864	3.99e-27	4.65e-26	ZBTB8B		ENSG00000262454	54.8678	0.87338	0.280892	3.10931	0.00187527	0.00489165	MIR193BHG
ENSG00000182175	143.816	-2.62062	0.160118	-16.3668	3.3e-60	1.02e-58	RGMA		ENSG00000083454	40.4118	0.873601	0.303063	2.88257	0.00394439	0.00983362	P2RX5
ENSG00000058085	24.3701	-2.62011	0.461899	-5.67246	1.41e-08	6.17e-08	LAMC2		ENSG00000267508	135.017	0.874052	0.151722	5.76086	8.37e-09	3.73e-08	ZNF285
ENSG00000240498	16.5143	-2.61925	0.483162	-5.42107	5.92e-08	2.48e-07	CDKN2B-AS1		ENSG00000197852	390.304	0.87406	0.0965756	9.05052	1.42e-19	1.19e-18	INKA2
ENSG00000242173	118.768	-2.61566	0.192854	-13.5629	6.64e-42	1.26e-40	ARHGDIG		ENSG00000273391	177.218	0.874283	0.160303	5.45394	4.93e-08	2.08e-07	AC083880.1
ENSG00000225889	7.25894	-2.61383	0.678939	-3.84987	0.000118181	0.000361431	AC012368.1		ENSG00000256073	970.47	0.874421	0.0911735	9.59074	8.75e-22	8.07e-21	URB1-AS1
ENSG00000163431	42.2153	-2.61228	0.337368	-7.74311	9.7e-15	6.34e-14	LMOD1		ENSG00000272931	33.8198	0.874633	0.312698	2.79705	0.00515711	0.0126235	AC099568.2
ENSG00000189350	6.5498	-2.61157	0.834748	-3.12858	0.00175653	0.00460068	TOGARAM2		ENSG00000159176	2540.34	0.874674	0.0493869	17.7106	3.47e-70	1.35e-68	CSRP1
ENSG00000187672	39.0431	-2.61136	0.31855	-8.19764	2.45e-16	1.74e-15	ERC2		ENSG00000268949	27.3576	0.87491	0.367192	2.38271	0.0171859	0.037921	MRPS17P1
ENSG00000124194	44.5279	-2.6097	0.309883	-8.42158	3.71e-17	2.76e-16	GDAP1L1		ENSG00000268883	83.6178	0.875187	0.236124	3.70648	0.000210163	0.000621447	PNMA6B
ENSG00000108001	276.32	-2.60898	0.132587	-19.6776	3.36e-86	1.84e-84	EBF3		ENSG00000143429	150.21	0.876749	0.149426	5.86745	4.43e-09	2.01e-08	LSP1P4
ENSG00000091129	114.172	-2.6078	0.183103	-14.2423	5.01e-46	1.07e-44	NRCAM		ENSG00000262410	22.3436	0.876879	0.345359	2.53903	0.011116	0.0255851	AC024361.1
ENSG00000124302	27.1074	-2.60756	0.429667	-6.06879	1.29e-09	6.09e-09	CHST8		ENSG00000187266	521.939	0.877373	0.0848474	10.3406	4.62e-25	4.93e-24	EPOR
ENSG00000260230	47.4597	-2.60661	0.293786	-8.8725	7.15e-19	5.76e-18	FRRS1L		ENSG00000245685	20.8839	0.877524	0.356366	2.46242	0.0138001	0.03114	FRG1-DT
ENSG00000125730	14.9694	-2.60571	0.50679	-5.1416	2.72e-07	1.08e-06	C3		ENSG00000162949	108.164	0.878074	0.17912	4.90215	9.48e-07	3.58e-06	CAPN13
ENSG00000268785	16.9524	-2.60506	0.457436	-5.69491	1.23e-08	5.43e-08	RPL7P50		ENSG00000065361	4918.62	0.878199	0.0476124	18.4447	5.75e-76	2.55e-74	ERBB3
ENSG00000234215	2.87281	-2.59881	1.13381	-2.2921	0.0218998	0.0471601	CT66		ENSG00000231443	25.9703	0.878235	0.336771	2.60781	0.00911234	0.021298	AC124944.1
ENSG00000234936	8.33744	-2.59848	0.692878	-3.75028	0.000176641	0.000527085	AC010883.1		ENSG00000160111	55.2731	0.878398	0.208919	4.20449	2.62e-05	8.59e-05	CPAMD8
ENSG00000165309	7.72749	-2.59742	0.687067	-3.78045	0.000156544	0.000470436	ARMC3		ENSG00000224287	41.4234	0.878738	0.301312	2.91638	0.00354123	0.00888249	MSL3P1
ENSG00000020633	52.7491	-2.59727	0.340658	-7.62429	2.45e-14	1.57e-13	RUNX3		ENSG00000047648	2002.79	0.878806	0.0660592	13.3033	2.21e-40	4.04e-39	ARHGAP6
ENSG00000226419	308.289	-2.59631	0.129145	-20.1038	6.84e-90	4.02e-88	SLC16A1-AS1		ENSG00000167642	6178.11	0.878821	0.0445334	19.734	1.1e-86	6.12e-85	SPINT2
ENSG00000043039	90.0403	-2.59609	0.196399	-13.2184	6.87e-40	1.23e-38	BARX2		ENSG00000223776	37.1197	0.878918	0.316622	2.77593	0.00550448	0.0134033	LGALS8-AS1
ENSG00000177614	115.57	-2.59607	0.174665	-14.8632	5.72e-50	1.37e-48	PGBD5		ENSG00000105427	143.267	0.879099	0.185346	4.74301	2.11e-06	7.69e-06	CNFN
ENSG00000144596	34.1823	-2.59556	0.322929	-8.03754	9.17e-16	6.34e-15	GRIP2		ENSG00000272347	20.6035	0.879491	0.381189	2.30723	0.0210421	0.0454914	AC116351.2
ENSG00000178031	4.30434	-2.59465	1.03254	-2.51288	0.011975	0.0273744	ADAMTSL1		ENSG00000167995	1100.93	0.880311	0.0564006	15.6082	6.4e-55	1.75e-53	BEST1
ENSG00000133863	103.485	-2.59418	0.21906	-11.8424	2.36e-32	3.33e-31	TEX15		ENSG00000265982	18.8264	0.880513	0.357666	2.46183	0.0138229	0.0311864	AC103810.3
ENSG00000168461	199.649	-2.59151	0.131131	-19.7628	6.22e-87	3.48e-85	RAB31		ENSG00000271781	44.5158	0.882069	0.273851	3.22098	0.00127753	0.00341839	AC026740.1
ENSG00000168329	6.42751	-2.59055	0.792898	-3.26719	0.00108621	0.00293329	CX3CR1		ENSG00000119411	968.802	0.882237	0.0737248	11.9666	5.32e-33	7.66e-32	BSPRY
ENSG00000259764	11.6178	-2.58955	0.664883	-3.89474	9.83e-05	0.000303277	PCSK6-AS1		ENSG00000268670	35.1712	0.88271	0.302219	2.92076	0.00349176	0.00876559	AC016586.1
ENSG00000249780	18.0942	-2.58834	0.469389	-5.51428	3.5e-08	1.49e-07	AC093809.1		ENSG00000170775	406.513	0.883885	0.0884309	9.99521	1.6e-23	1.6e-22	GPR37
ENSG00000187068	26.432	-2.58807	0.421881	-6.1346	8.54e-10	4.09e-09	C3orf70		ENSG00000265972	8977.61	0.884379	0.0636184	13.9013	6.22e-44	1.24e-42	TXNIP
ENSG00000105143	15.8846	-2.58461	0.463783	-5.57289	2.51e-08	1.08e-07	SLC1A6		ENSG00000278266	65.6805	0.884837	0.215793	4.10039	4.12e-05	0.000133052	AC079949.2
ENSG00000109063	35.1885	-2.58346	0.334657	-7.71972	1.17e-14	7.58e-14	MYH3		ENSG00000138162	3902.08	0.884859	0.0635922	13.9146	5.17e-44	1.03e-42	TACC2
ENSG00000116785	6.3881	-2.58331	0.759832	-3.39984	0.000674246	0.00187229	CFHR3		ENSG00000260874	58.0288	0.885151	0.229696	3.85357	0.000116407	0.000356204	AC106820.5
ENSG00000142279	74.404	-2.58214	0.240218	-10.7491	5.98e-27	6.94e-26	WTIP		ENSG00000006047	440.36	0.885187	0.0929284	9.52547	1.64e-21	1.49e-20	YBX2
ENSG00000095002	858.179	-2.58165	0.0747082	-34.5565	1.14e-261	6.96e-259	MSH2		ENSG00000107968	177.842	0.885625	0.121845	7.26847	3.64e-13	2.17e-12	MAP3K8
ENSG00000277758	59.8905	-2.58147	0.251224	-10.2756	9.08e-25	9.56e-24	FO681492.1		ENSG00000210191	48.6454	0.885669	0.270078	3.2793	0.00104064	0.002818	MT-TL2
ENSG00000233577	22.8534	-2.57974	0.407301	-6.33375	2.39e-10	1.19e-09	AL022332.1		ENSG00000182165	388.186	0.886785	0.114244	7.76222	8.35e-15	5.48e-14	TP53TG1
ENSG00000107736	56.5315	-2.57834	0.247488	-10.418	2.05e-25	2.22e-24	CDH23		ENSG00000166272	1363.93	0.887177	0.0624746	14.2006	9.08e-46	1.93e-44	WBP1L
ENSG00000258314	5.41304	-2.57589	0.963796	-2.67266	0.00752535	0.0178838	AL589182.1		ENSG00000247271	297.767	0.887184	0.105081	8.44282	3.1e-17	2.31e-16	ZBED5-AS1
ENSG00000266709	17.7409	-2.57584	0.479615	-5.37064	7.85e-08	3.25e-07	AC005224.3		ENSG00000142089	1569.1	0.887409	0.0830335	10.6874	1.17e-26	1.34e-25	IFITM3
ENSG00000123454	3.996	-2.57429	0.840556	-3.0626	0.00219424	0.00566349	DBH		ENSG00000198496	1004.93	0.887421	0.0623449	14.2341	5.63e-46	1.2e-44	NBR2
ENSG00000185666	13.7678	-2.57362	0.50986	-5.0477	4.47e-07	1.74e-06	SYN3		ENSG00000161267	2129.96	0.887722	0.0568143	15.625	4.92e-55	1.35e-53	BDH1
ENSG00000234147	64.187	-2.57176	0.246322	-10.4407	1.62e-25	1.76e-24	AL035446.1		ENSG00000147408	79.4496	0.887883	0.202268	4.38963	1.14e-05	3.86e-05	CSGALNACT1
ENSG00000186481	18.9672	-2.571	0.434527	-5.91678	3.28e-09	1.51e-08	ANKRD20A5P		ENSG00000261211	169.951	0.88812	0.143736	6.17882	6.46e-10	3.11e-09	AL031123.2
ENSG00000149948	261.39	-2.57036	0.129463	-19.854	1.02e-87	5.74e-86	HMGA2		ENSG00000253846	33.0348	0.888498	0.313158	2.83722	0.0045508	0.0112445	PCDHGA10
ENSG00000143341	35.7954	-2.56907	0.377803	-6.80002	1.05e-11	5.74e-11	HMCN1		ENSG00000167555	409.374	0.888519	0.0894051	9.93812	2.84e-23	2.81e-22	ZNF528
ENSG00000117477	85.5366	-2.56825	0.222979	-11.5179	1.07e-30	1.43e-29	CCDC181		ENSG00000249684	21.0397	0.88861	0.339541	2.61709	0.0088682	0.0207769	AC106795.2
ENSG00000271601	459.898	-2.56785	0.102265	-25.1096	3.9e-139	5.06e-137	LIX1L		ENSG00000168140	646.712	0.888647	0.108576	8.18459	2.73e-16	1.93e-15	VASN
ENSG00000226468	2.83624	-2.56775	1.09267	-2.34997	0.0187747	0.0410185	AC018641.1		ENSG00000106038	23.2894	0.888653	0.376379	2.36106	0.018223	0.0399432	EVX1
ENSG00000155849	22.9848	-2.56619	0.464618	-5.52323	3.33e-08	1.42e-07	ELMO1		ENSG00000198753	1249.26	0.888757	0.0835955	10.6316	2.12e-26	2.41e-25	PLXNB3
ENSG00000180764	10.2616	-2.56479	0.564578	-4.54285	5.55e-06	1.95e-05	PIPSL		ENSG00000232803	20.7164	0.888769	0.334666	2.65569	0.00791474	0.0187298	SLCO4A1-AS1
ENSG00000061337	24.903	-2.56168	0.386515	-6.62765	3.41e-11	1.81e-10	LZTS1		ENSG00000158985	2492.04	0.888858	0.0421707	21.0776	1.28e-98	8.68e-97	CDC42SE2
ENSG00000182240	329.736	-2.56146	0.112503	-22.768	9.52e-115	8.63e-113	BACE2		ENSG00000246174	127.164	0.889434	0.153945	5.77762	7.58e-09	3.39e-08	KCTD21-AS1
ENSG00000072422	193.42	-2.56109	0.14397	-17.7891	8.58e-71	3.39e-69	RHOBTB1		ENSG00000217862	33.5997	0.890078	0.352282	2.5266	0.0115171	0.0264244	HIST1H4PS1
ENSG00000104059	82.4752	-2.56033	0.214239	-11.9508	6.43e-33	9.25e-32	FAM189A1		ENSG00000139178	361.478	0.890318	0.0959158	9.28228	1.66e-20	1.44e-19	C1RL
ENSG00000228906	5.5669	-2.55979	0.759422	-3.37071	0.000749758	0.00206881	AL353804.1		ENSG00000274828	285.534	0.890907	0.120622	7.38592	1.51e-13	9.25e-13	AC068473.5
ENSG00000102265	255.14	-2.55878	0.15642	-16.3584	3.79e-60	1.16e-58	TIMP1		ENSG00000146674	626.76	0.891194	0.0780703	11.4153	3.51e-30	4.59e-29	IGFBP3
ENSG00000197565	144.392	-2.55797	0.19997	-12.7918	1.82e-37	3.03e-36	COL4A6		ENSG00000227908	27.4337	0.89124	0.355417	2.50759	0.0121558	0.0277577	AC016596.1
ENSG00000227365	3.35368	-2.55452	1.01681	-2.51228	0.0119953	0.0274153	AC008060.2		ENSG00000164116	2481.34	0.891265	0.050245	17.7384	2.12e-70	8.31e-69	GUCY1A1
ENSG00000137726	20.8436	-2.55236	0.394501	-6.46986	9.81e-11	5.04e-10	FXYD6		ENSG00000213977	43.7519	0.891848	0.276803	3.22195	0.00127319	0.00340746	TAX1BP3
ENSG00000186867	11.1526	-2.55102	0.615906	-4.14189	3.44e-05	0.000111825	QRFPR		ENSG00000253210	61.1181	0.892422	0.215749	4.13639	3.53e-05	0.000114445	AC040970.1
ENSG00000167123	433.533	-2.55049	0.101039	-25.2425	1.37e-140	1.85e-138	CERCAM		ENSG00000228714	109.522	0.892497	0.179504	4.97203	6.63e-07	2.54e-06	AL691420.1
ENSG00000178538	113.953	-2.55041	0.182099	-14.0057	1.44e-44	2.94e-43	CA8		ENSG00000232682	18.0391	0.892651	0.389124	2.294	0.0217904	0.0469541	AL592430.1
ENSG00000185668	20.4523	-2.54922	0.464332	-5.49008	4.02e-08	1.71e-07	POU3F1		ENSG00000231784	57.1016	0.892795	0.228702	3.90375	9.47e-05	0.000293055	DBIL5P
ENSG00000151612	115.354	-2.54612	0.258273	-9.85826	6.31e-23	6.17e-22	ZNF827		ENSG00000183837	206.085	0.893312	0.127781	6.99094	2.73e-12	1.55e-11	PNMA3
ENSG00000167281	66.8563	-2.54215	0.28156	-9.0288	1.74e-19	1.44e-18	RBFOX3		ENSG00000230061	366.721	0.893811	0.125759	7.10732	1.18e-12	6.87e-12	TRPM2-AS
ENSG00000228956	12.8139	-2.54206	0.610954	-4.1608	3.17e-05	0.000103263	SATB1-AS1		ENSG00000224271	35.9538	0.893875	0.273276	3.27096	0.00107182	0.00289642	AL117329.1
ENSG00000115423	72.2987	-2.54142	0.239243	-10.6228	2.34e-26	2.64e-25	DNAH6		ENSG00000162997	98.5839	0.894035	0.185617	4.81656	1.46e-06	5.41e-06	PRORSD1P
ENSG00000166974	613.238	-2.54084	0.0863431	-29.4272	2.46e-190	6.51e-188	MAPRE2		ENSG00000165092	1673.95	0.894099	0.0713581	12.5298	5.13e-36	8.14e-35	ALDH1A1
ENSG00000159784	17.3154	-2.54076	0.443986	-5.72261	1.05e-08	4.64e-08	FAM131B		ENSG00000120669	146.507	0.894281	0.152836	5.85126	4.88e-09	2.21e-08	SOHLH2
ENSG00000158163	84.606	-2.54067	0.214817	-11.8271	2.83e-32	3.98e-31	DZIP1L		ENSG00000260063	73.3113	0.894283	0.21866	4.08983	4.32e-05	0.000138917	AL512408.1
ENSG00000131981	24.7885	-2.54028	0.381636	-6.6563	2.81e-11	1.5e-10	LGALS3		ENSG00000184678	3771.09	0.894286	0.0647979	13.8011	2.51e-43	4.92e-42	HIST2H2BE
ENSG00000230183	19.1013	-2.53966	0.430363	-5.90121	3.61e-09	1.65e-08	CNOT6LP1		ENSG00000273679	43.6515	0.894634	0.326491	2.74015	0.00614104	0.0148168	AC100757.1
ENSG00000256008	7.92008	-2.53715	0.749583	-3.38475	0.000712424	0.00197114	AC125616.1		ENSG00000197888	367.511	0.89483	0.148152	6.03993	1.54e-09	7.24e-09	UGT2B17
ENSG00000136274	10.6144	-2.53645	0.552132	-4.59392	4.35e-06	1.55e-05	NACAD		ENSG00000160685	6212.1	0.895487	0.040165	22.2952	4.11e-110	3.42e-108	ZBTB7B
ENSG00000182103	12.1673	-2.53346	0.498211	-5.08511	3.67e-07	1.44e-06	FAM181B		ENSG00000249413	24.6948	0.895503	0.354462	2.52637	0.0115248	0.0264395	AC116049.2
ENSG00000174500	11.6485	-2.53341	0.496772	-5.09974	3.4e-07	1.34e-06	GCSAM		ENSG00000231993	95.8185	0.895677	0.208795	4.28974	1.79e-05	5.98e-05	EP300-AS1
ENSG00000154783	14.3153	-2.53288	0.470215	-5.38664	7.18e-08	2.98e-07	FGD5		ENSG00000177788	181.81	0.895877	0.138391	6.47354	9.57e-11	4.92e-10	AL162595.1
ENSG00000162614	84.6456	-2.53205	0.22534	-11.2365	2.7e-29	3.41e-28	NEXN		ENSG00000165591	369.416	0.895885	0.100973	8.87256	7.15e-19	5.76e-18	FAAH2
ENSG00000065320	246.28	-2.53169	0.125859	-20.1153	5.42e-90	3.21e-88	NTN1		ENSG00000111321	3940.27	0.896212	0.0629387	14.2394	5.21e-46	1.12e-44	LTBR
ENSG00000259917	15.2411	-2.53144	0.513852	-4.92639	8.38e-07	3.18e-06	HNRNPLP2		ENSG00000164300	6097.86	0.896559	0.0436125	20.5574	6.61e-94	4.16e-92	SERINC5
ENSG00000068078	322.114	-2.53015	0.128166	-19.7412	9.55e-87	5.32e-85	FGFR3		ENSG00000280156	24.2902	0.897219	0.333616	2.68938	0.00715859	0.0170727	#N/A
ENSG00000123360	19.5744	-2.52945	0.396165	-6.38484	1.72e-10	8.66e-10	PDE1B		ENSG00000008394	4930.46	0.897358	0.0597447	15.0199	5.44e-51	1.35e-49	MGST1
ENSG00000183853	457.365	-2.52923	0.0992293	-25.4887	2.63e-143	3.75e-141	KIRREL1		ENSG00000275074	416.133	0.898093	0.101156	8.87826	6.79e-19	5.48e-18	NUDT18
ENSG00000143028	46.7378	-2.52847	0.318775	-7.93183	2.16e-15	1.46e-14	SYPL2		ENSG00000217275	32.198	0.898429	0.353096	2.54444	0.0109454	0.0252137	AL031777.1
ENSG00000129675	313.814	-2.52768	0.112159	-22.5365	1.82e-112	1.56e-110	ARHGEF6		ENSG00000151150	7393.16	0.898445	0.0456083	19.6991	2.19e-86	1.21e-84	ANK3
ENSG00000243811	5.00569	-2.52519	0.810136	-3.11699	0.00182707	0.00477362	APOBEC3D		ENSG00000125508	79.4121	0.898505	0.211661	4.24501	2.19e-05	7.23e-05	SRMS
ENSG00000180592	31.1733	-2.52357	0.364137	-6.93029	4.2e-12	2.36e-11	SKIDA1		ENSG00000180638	26.6523	0.898933	0.312684	2.87489	0.00404171	0.0100662	SLC47A2
ENSG00000239218	3.77389	-2.52307	1.00706	-2.50538	0.0122321	0.0279203	RPS20P22		ENSG00000261408	47.131	0.89909	0.274785	3.27197	0.001068	0.00288668	TEN1-CDK3
ENSG00000152284	55.2721	-2.51918	0.242721	-10.3789	3.09e-25	3.32e-24	TCF7L1		ENSG00000213937	19.864	0.899224	0.385066	2.33524	0.0195307	0.0425215	CLDN9
ENSG00000240024	36.5677	-2.51844	0.30224	-8.33257	7.91e-17	5.77e-16	LINC00888		ENSG00000231010	22.4645	0.899851	0.350471	2.56755	0.0102421	0.0237088	AL121672.1
ENSG00000082293	12.441	-2.51468	0.528073	-4.76199	1.92e-06	7.02e-06	COL19A1		ENSG00000167046	49.1083	0.900084	0.274852	3.2748	0.00105737	0.0028602	AL357033.1
ENSG00000243587	79.1321	-2.5128	0.210095	-11.9603	5.74e-33	8.26e-32	#N/A		ENSG00000095383	249.806	0.900641	0.111232	8.097	5.63e-16	3.93e-15	TBC1D2
ENSG00000140931	132.752	-2.51193	0.183642	-13.6784	1.37e-42	2.64e-41	CMTM3		ENSG00000126561	94.8668	0.901212	0.21124	4.2663	1.99e-05	6.61e-05	STAT5A
ENSG00000104324	14.3537	-2.51107	0.523934	-4.79273	1.65e-06	6.07e-06	CPQ		ENSG00000260518	109.748	0.901296	0.156124	5.77294	7.79e-09	3.48e-08	BMS1P8
ENSG00000158966	381.808	-2.5093	0.111002	-22.6058	3.8e-113	3.32e-111	CACHD1		ENSG00000268204	48.9993	0.90145	0.315234	2.85962	0.00424144	0.0105255	AC008763.1
ENSG00000159712	24.1505	-2.5083	0.375112	-6.68681	2.28e-11	1.22e-10	ANKRD18CP		ENSG00000233672	24.5503	0.901768	0.324102	2.78236	0.00539649	0.0131637	RNASEH2B-AS1
ENSG00000168785	176.898	-2.50434	0.137188	-18.2548	1.9e-74	8.14e-73	TSPAN5		ENSG00000197653	251.229	0.901844	0.110206	8.18322	2.76e-16	1.95e-15	DNAH10
ENSG00000260296	4.32884	-2.50069	1.00474	-2.48889	0.0128143	0.0291336	AC095057.3		ENSG00000178826	25.3385	0.901997	0.362511	2.48819	0.0128395	0.0291808	TMEM139
ENSG00000140675	14.64	-2.50045	0.476485	-5.2477	1.54e-07	6.23e-07	SLC5A2		ENSG00000198482	278.059	0.902003	0.129021	6.99115	2.73e-12	1.55e-11	ZNF808
ENSG00000119865	85.1103	-2.50032	0.193359	-12.931	3.01e-38	5.13e-37	CNRIP1		ENSG00000166049	831.112	0.902133	0.0637721	14.1462	1.97e-45	4.13e-44	PASD1
ENSG00000147119	64.3222	-2.49879	0.270902	-9.22396	2.86e-20	2.45e-19	CHST7		ENSG00000187994	44.0939	0.90258	0.269513	3.34894	0.000811223	0.00222835	RINL
ENSG00000007372	328.905	-2.49628	0.120257	-20.7579	1.04e-95	6.77e-94	PAX6		ENSG00000177685	3054.63	0.902937	0.0572468	15.7727	4.79e-56	1.35e-54	CRACR2B
ENSG00000134874	463.934	-2.49627	0.0883658	-28.2492	1.45e-175	3.12e-173	DZIP1		ENSG00000214357	592.218	0.902937	0.105478	8.56044	1.12e-17	8.56e-17	NEURL1B
ENSG00000188051	6.51269	-2.49525	0.700421	-3.5625	0.000367347	0.00105591	TMEM221		ENSG00000271646	208.978	0.90309	0.133321	6.7738	1.25e-11	6.84e-11	AC099343.3
ENSG00000141639	23.317	-2.49392	0.445866	-5.59343	2.23e-08	9.62e-08	MAPK4		ENSG00000145321	72.019	0.90329	0.234767	3.8476	0.000119281	0.000364592	GC
ENSG00000275325	23.5288	-2.49388	0.583529	-4.2738	1.92e-05	6.4e-05	PDCD6IPP1		ENSG00000278626	32.7764	0.90367	0.386159	2.34015	0.0192759	0.04202	AC023310.4
ENSG00000145147	678.175	-2.49371	0.078822	-31.6372	1.14e-219	4.16e-217	SLIT2		ENSG00000101160	3348.55	0.903759	0.0486134	18.5907	3.82e-77	1.74e-75	CTSZ
ENSG00000198353	384.075	-2.49328	0.114761	-21.7258	1.17e-104	9.01e-103	HOXC4		ENSG00000248405	25.9237	0.904016	0.344017	2.62782	0.00859329	0.0201878	PRR5-ARHGAP8
ENSG00000108576	39.9006	-2.49323	0.302509	-8.24184	1.7e-16	1.22e-15	SLC6A4		ENSG00000172794	131.833	0.904162	0.166133	5.44239	5.26e-08	2.21e-07	RAB37
ENSG00000135447	14.5735	-2.49257	0.481655	-5.17502	2.28e-07	9.11e-07	PPP1R1A		ENSG00000198087	5693.38	0.904952	0.0395081	22.9055	4.1e-116	3.78e-114	CD2AP
ENSG00000274253	11.6463	-2.49089	0.57819	-4.30808	1.65e-05	5.52e-05	AC138649.1		ENSG00000143816	165.643	0.905274	0.144669	6.25754	3.91e-10	1.92e-09	WNT9A
ENSG00000077274	8.69914	-2.48944	0.717157	-3.47127	0.000518004	0.00145816	CAPN6		ENSG00000267321	460.752	0.905423	0.0956519	9.46581	2.91e-21	2.62e-20	SNHG30
ENSG00000180818	152.329	-2.48919	0.164069	-15.1716	5.45e-52	1.39e-50	HOXC10		ENSG00000107742	407.495	0.905489	0.102516	8.83268	1.02e-18	8.18e-18	SPOCK2
ENSG00000118004	16.6345	-2.48789	0.450987	-5.51655	3.46e-08	1.47e-07	COLEC11		ENSG00000167748	206.402	0.905889	0.152836	5.92718	3.08e-09	1.42e-08	KLK1
ENSG00000188582	9.75712	-2.48775	0.634266	-3.92225	8.77e-05	0.000272476	PAQR9		ENSG00000230280	20.1224	0.905905	0.374469	2.41917	0.015556	0.0347061	HNRNPA1P59
ENSG00000234965	53.3037	-2.48558	0.244422	-10.1692	2.72e-24	2.81e-23	SHISA8		ENSG00000280193	94.1435	0.906001	0.192915	4.69638	2.65e-06	9.59e-06	AC132219.2
ENSG00000165300	110.196	-2.48551	0.18438	-13.4804	2.04e-41	3.85e-40	SLITRK5		ENSG00000121310	2317.35	0.906106	0.063784	14.2058	8.43e-46	1.79e-44	ECHDC2
ENSG00000165495	189.035	-2.48509	0.142247	-17.4702	2.42e-68	9e-67	PKNOX2		ENSG00000134317	424.412	0.906837	0.0986875	9.18898	3.97e-20	3.37e-19	GRHL1
ENSG00000085563	24.8316	-2.48497	0.353558	-7.02848	2.09e-12	1.2e-11	ABCB1		ENSG00000273253	202.344	0.90694	0.136348	6.65167	2.9e-11	1.54e-10	AL022328.4
ENSG00000213943	4.32153	-2.48485	0.952262	-2.60942	0.00906966	0.0212091	KRT18P17		ENSG00000178078	1452.15	0.907054	0.0651833	13.9154	5.1e-44	1.02e-42	STAP2
ENSG00000244274	13.4824	-2.48323	0.528509	-4.69857	2.62e-06	9.49e-06	DBNDD2		ENSG00000021300	4442.01	0.907181	0.0573016	15.8317	1.88e-56	5.34e-55	PLEKHB1
ENSG00000250133	44.1845	-2.48281	0.266898	-9.30247	1.37e-20	1.19e-19	HOXC-AS2		ENSG00000180525	27.208	0.908204	0.3207	2.83195	0.00462657	0.0114184	PRR26
ENSG00000130038	94.273	-2.48194	0.204261	-12.1509	5.68e-34	8.44e-33	CRACR2A		ENSG00000184363	4083.12	0.908227	0.0515588	17.6154	1.88e-69	7.15e-68	PKP3
ENSG00000142303	74.1162	-2.48126	0.286806	-8.65137	5.09e-18	3.94e-17	ADAMTS10		ENSG00000253958	175.011	0.908277	0.133214	6.81817	9.22e-12	5.08e-11	CLDN23
ENSG00000179546	4.06397	-2.4811	0.96914	-2.56011	0.0104639	0.0241836	HTR1D		ENSG00000127329	98.3922	0.908321	0.167006	5.43886	5.36e-08	2.26e-07	PTPRB
ENSG00000203706	16.9306	-2.48091	0.432873	-5.73126	9.97e-09	4.42e-08	SERTAD4-AS1		ENSG00000197093	35.375	0.908345	0.295309	3.07592	0.00209856	0.00543594	GAL3ST4
ENSG00000253426	9.68031	-2.47848	0.702083	-3.53018	0.000415282	0.00118564	#N/A		ENSG00000263063	20.7951	0.908841	0.388399	2.33997	0.0192855	0.0420375	AC024361.2
ENSG00000278500	9.56999	-2.47714	0.566762	-4.37069	1.24e-05	4.2e-05	#N/A		ENSG00000262172	70.8212	0.909064	0.185817	4.89225	9.97e-07	3.76e-06	AC116025.2
ENSG00000146070	9.34763	-2.47682	0.674902	-3.6699	0.000242645	0.000712437	PLA2G7		ENSG00000214530	2538.3	0.909322	0.074711	12.1712	4.43e-34	6.59e-33	STARD10
ENSG00000249307	4.74439	-2.47605	0.914153	-2.70857	0.00675745	0.016182	LINC01088		ENSG00000180573	2046.83	0.909448	0.0589812	15.4193	1.21e-53	3.23e-52	HIST1H2AC
ENSG00000225756	7.14178	-2.47593	0.747644	-3.31164	0.000927513	0.00252984	DBH-AS1		ENSG00000103089	122.038	0.909835	0.173198	5.25316	1.5e-07	6.06e-07	FA2H
ENSG00000162624	13.2314	-2.47452	0.496992	-4.97899	6.39e-07	2.45e-06	LHX8		ENSG00000159166	2965.78	0.909903	0.0520836	17.47	2.42e-68	9.01e-67	LAD1
ENSG00000185567	113.933	-2.47372	0.207108	-11.9441	6.97e-33	1e-31	AHNAK2		ENSG00000275410	313.105	0.909942	0.106509	8.54334	1.3e-17	9.91e-17	HNF1B
ENSG00000120068	144.723	-2.47202	0.154063	-16.0456	6.14e-58	1.78e-56	HOXB8		ENSG00000279495	162.058	0.910291	0.156655	5.81082	6.22e-09	2.8e-08	AL928654.4
ENSG00000172403	7.86485	-2.46958	0.652243	-3.78629	0.000152915	0.000460185	SYNPO2		ENSG00000229375	50.6415	0.910371	0.223424	4.07464	4.61e-05	0.000147935	USP24P1
ENSG00000198682	97.325	-2.46923	0.211104	-11.6968	1.32e-31	1.82e-30	PAPSS2		ENSG00000090020	2327.89	0.910479	0.0993994	9.1598	5.2e-20	4.4e-19	SLC9A1
ENSG00000159186	11.3516	-2.46846	0.560266	-4.40588	1.05e-05	3.6e-05	AC007383.1		ENSG00000149781	30.2389	0.910543	0.341971	2.66263	0.00775318	0.0183807	FERMT3
ENSG00000143476	1089.45	-2.46691	0.0806604	-30.5839	2e-205	6.12e-203	DTL		ENSG00000261804	95.5102	0.911429	0.191215	4.76653	1.87e-06	6.87e-06	AC007342.4
ENSG00000215218	20.928	-2.46669	0.469457	-5.25435	1.49e-07	6.02e-07	UBE2QL1		ENSG00000043143	2028.19	0.911648	0.0649084	14.0451	8.25e-45	1.69e-43	JADE2
ENSG00000121270	24.3969	-2.46653	0.371743	-6.63503	3.24e-11	1.72e-10	ABCC11		ENSG00000229491	21.9148	0.912055	0.370463	2.46193	0.013819	0.0311802	AC136489.1
ENSG00000162373	10.4818	-2.46652	0.573244	-4.30274	1.69e-05	5.65e-05	BEND5		ENSG00000115339	688.679	0.912084	0.0708044	12.8817	5.7e-38	9.63e-37	GALNT3
ENSG00000121068	128.466	-2.46504	0.169204	-14.5684	4.46e-48	1.02e-46	TBX2		ENSG00000153179	17968	0.912448	0.0378922	24.0801	4.04e-128	4.42e-126	RASSF3
ENSG00000104804	15.4979	-2.46384	0.445007	-5.53662	3.08e-08	1.32e-07	TULP2		ENSG00000162069	1111.17	0.912466	0.0649498	14.0488	7.83e-45	1.61e-43	BICDL2
ENSG00000170873	87.0289	-2.46317	0.204038	-12.0721	1.48e-33	2.17e-32	MTSS1		ENSG00000244161	127.186	0.912596	0.153623	5.9405	2.84e-09	1.31e-08	FLNB-AS1
ENSG00000162882	11.6549	-2.46278	0.585285	-4.20782	2.58e-05	8.47e-05	HAAO		ENSG00000214401	74.8908	0.91272	0.23948	3.81126	0.000138259	0.000419013	KANSL1-AS1
ENSG00000168675	42.4546	-2.46066	0.285011	-8.63355	5.95e-18	4.59e-17	LDLRAD4		ENSG00000101104	4373.51	0.91281	0.0587462	15.5382	1.91e-54	5.17e-53	PABPC1L
ENSG00000102935	42.0625	-2.45949	0.276018	-8.91061	5.08e-19	4.12e-18	ZNF423		ENSG00000215039	683.537	0.912908	0.0783927	11.6453	2.42e-31	3.31e-30	CD27-AS1
ENSG00000130508	498.301	-2.45946	0.0883097	-27.8504	1.06e-170	2.15e-168	PXDN		ENSG00000138613	1075.45	0.913341	0.0698997	13.0664	5.12e-39	8.94e-38	APH1B
ENSG00000248441	6.81322	-2.45901	0.68735	-3.57753	0.000346857	0.00100047	LINC01197		ENSG00000254101	101.292	0.91368	0.174882	5.22456	1.75e-07	7.03e-07	LINC02055
ENSG00000260548	3.44538	-2.45456	1.05845	-2.31902	0.0203939	0.0442327	AL035425.2		ENSG00000168907	914.786	0.91386	0.0717214	12.7418	3.46e-37	5.7e-36	PLA2G4F
ENSG00000105974	28.2321	-2.45282	0.343648	-7.13759	9.5e-13	5.54e-12	CAV1		ENSG00000255145	40.7809	0.913912	0.299131	3.05522	0.00224893	0.00579702	STX17-AS1
ENSG00000135362	25.7818	-2.4516	0.388075	-6.31734	2.66e-10	1.32e-09	PRR5L		ENSG00000180229	453.415	0.914068	0.0819587	11.1528	6.94e-29	8.68e-28	HERC2P3
ENSG00000165972	6.82201	-2.45113	0.785181	-3.12173	0.00179791	0.0047028	CCDC38		ENSG00000250420	421.509	0.914141	0.095004	9.62213	6.45e-22	5.99e-21	AACSP1
ENSG00000186998	110.015	-2.45029	0.201752	-12.145	6.09e-34	9.05e-33	EMID1		ENSG00000162390	280.249	0.914443	0.101485	9.01063	2.05e-19	1.69e-18	ACOT11
ENSG00000133710	18.3697	-2.44916	0.460955	-5.31323	1.08e-07	4.41e-07	SPINK5		ENSG00000139194	52.079	0.914845	0.248163	3.68647	0.000227382	0.000669268	RBP5
ENSG00000154822	109.469	-2.44909	0.202888	-12.0711	1.5e-33	2.2e-32	PLCL2		ENSG00000139714	107.21	0.91491	0.16786	5.45045	5.02e-08	2.12e-07	MORN3
ENSG00000120820	87.2798	-2.44859	0.213391	-11.4746	1.77e-30	2.34e-29	GLT8D2		ENSG00000197355	1238.69	0.915346	0.0768454	11.9115	1.03e-32	1.47e-31	UAP1L1
ENSG00000223802	39.4132	-2.44838	0.344471	-7.10764	1.18e-12	6.86e-12	CERS1		ENSG00000240207	27.1616	0.915422	0.386182	2.37044	0.0177669	0.0390619	AC080013.1
ENSG00000054392	54.1027	-2.44549	0.323556	-7.55816	4.09e-14	2.58e-13	HHAT		ENSG00000260563	108.408	0.915436	0.191908	4.77018	1.84e-06	6.75e-06	AC132872.1
ENSG00000279058	7.10162	-2.44358	0.78659	-3.10655	0.00189284	0.00493468	AGAP14P		ENSG00000115109	2386.91	0.915593	0.0457617	20.0079	4.7e-89	2.72e-87	EPB41L5
ENSG00000101812	5.35324	-2.4419	0.798475	-3.05821	0.00222666	0.00574353	H2BFM		ENSG00000246082	750.143	0.915599	0.0728187	12.5737	2.95e-36	4.71e-35	NUDT16P1
ENSG00000115380	18.4934	-2.43901	0.5064	-4.81637	1.46e-06	5.42e-06	EFEMP1		ENSG00000170629	73.1653	0.915865	0.234018	3.91366	9.09e-05	0.000281782	DPY19L2P2
ENSG00000198944	38.8511	-2.43883	0.306389	-7.95991	1.72e-15	1.17e-14	SOWAHA		ENSG00000185070	93.8003	0.91588	0.180927	5.06214	4.15e-07	1.62e-06	FLRT2
ENSG00000115461	159.236	-2.4371	0.182261	-13.3715	8.88e-41	1.64e-39	IGFBP5		ENSG00000224413	95.7337	0.916008	0.192987	4.74649	2.07e-06	7.56e-06	AP001476.1
ENSG00000213131	3.93147	-2.43653	1.01928	-2.39043	0.0168285	0.0372249	YWHAZP4		ENSG00000164266	39.6698	0.916025	0.288544	3.17465	0.00150017	0.00397429	SPINK1
ENSG00000145362	415.203	-2.43423	0.101695	-23.9366	1.27e-126	1.37e-124	ANK2		ENSG00000171219	1671.44	0.91622	0.0581338	15.7605	5.81e-56	1.63e-54	CDC42BPG
ENSG00000130234	15.7455	-2.43116	0.425732	-5.71054	1.13e-08	4.97e-08	ACE2		ENSG00000267060	28.9732	0.916412	0.327196	2.80081	0.0050975	0.0124887	PTGES3L
ENSG00000146233	47.3035	-2.42972	0.291191	-8.34408	7.18e-17	5.25e-16	CYP39A1		ENSG00000100311	426.905	0.916958	0.087952	10.4257	1.89e-25	2.05e-24	PDGFB
ENSG00000089199	7.74817	-2.42473	0.597143	-4.06055	4.9e-05	0.000156643	CHGB		ENSG00000131187	1320.08	0.917084	0.0637581	14.3838	6.54e-47	1.44e-45	F12
ENSG00000144843	7.41661	-2.42286	0.666201	-3.63682	0.00027602	0.000804331	ADPRH		ENSG00000168070	328.362	0.917284	0.104659	8.76446	1.88e-18	1.48e-17	MAJIN
ENSG00000173227	43.3486	-2.42126	0.305352	-7.92943	2.2e-15	1.49e-14	SYT12		ENSG00000276073	43.6764	0.91758	0.32477	2.82532	0.0047233	0.0116414	#N/A
ENSG00000250337	161.306	-2.41867	0.174369	-13.8709	9.5e-44	1.89e-42	PURPL		ENSG00000277969	272.284	0.917712	0.118724	7.72979	1.08e-14	7.02e-14	AC006449.6
ENSG00000121690	48.0224	-2.41866	0.257516	-9.39228	5.87e-21	5.19e-20	DEPDC7		ENSG00000182791	87.4951	0.918178	0.203212	4.51832	6.23e-06	2.18e-05	CCDC87
ENSG00000272942	13.7477	-2.41866	0.600592	-4.02712	5.65e-05	0.000179205	AL022324.3		ENSG00000116661	852.136	0.9183	0.0819381	11.2072	3.76e-29	4.73e-28	FBXO2
ENSG00000066735	374.738	-2.4184	0.118823	-20.3529	4.37e-92	2.68e-90	KIF26A		ENSG00000174132	830.079	0.918596	0.0782384	11.741	7.86e-32	1.09e-30	FAM174A
ENSG00000110076	82.1229	-2.41829	0.204616	-11.8187	3.13e-32	4.4e-31	NRXN2		ENSG00000101850	25.9118	0.918962	0.352752	2.60512	0.00918409	0.021456	GPR143
ENSG00000166831	70.3737	-2.41761	0.229228	-10.5468	5.26e-26	5.85e-25	RBPMS2		ENSG00000278341	37.0922	0.919422	0.322903	2.84737	0.00440826	0.0109148	AC138028.6
ENSG00000167889	37.6724	-2.41686	0.3628	-6.66168	2.71e-11	1.44e-10	MGAT5B		ENSG00000259823	184.478	0.91951	0.141774	6.48575	8.83e-11	4.55e-10	LYPD8
ENSG00000176399	5.55284	-2.41678	0.740411	-3.2641	0.00109811	0.0029631	DMRTA1		ENSG00000277287	81.1323	0.919666	0.185518	4.95729	7.15e-07	2.73e-06	AL109976.1
ENSG00000249550	132.277	-2.41674	0.170205	-14.199	9.29e-46	1.97e-44	LINC01234		ENSG00000260996	24.1438	0.919764	0.325518	2.82554	0.00472006	0.0116345	BX255925.1
ENSG00000248890	10.1551	-2.41666	0.568921	-4.2478	2.16e-05	7.15e-05	HHIP-AS1		ENSG00000196549	11240	0.920166	0.0606443	15.1732	5.32e-52	1.36e-50	MME
ENSG00000273706	21.9456	-2.41525	0.42219	-5.72076	1.06e-08	4.69e-08	LHX1		ENSG00000267259	127.196	0.920346	0.202279	4.54989	5.37e-06	1.89e-05	ERVE-1
ENSG00000230524	16.7751	-2.41376	0.443676	-5.44036	5.32e-08	2.24e-07	COL6A4P1		ENSG00000278952	32.3166	0.920878	0.373037	2.46859	0.0135645	0.0306511	AP003068.4
ENSG00000259363	13.8086	-2.41369	0.561347	-4.29983	1.71e-05	5.72e-05	AC090825.1		ENSG00000170006	244.944	0.92095	0.13298	6.92545	4.35e-12	2.44e-11	TMEM154
ENSG00000119121	10.3759	-2.41348	0.579462	-4.16503	3.11e-05	0.000101462	TRPM6		ENSG00000165816	146.241	0.921135	0.143332	6.42657	1.31e-10	6.64e-10	VWA2
ENSG00000172986	138.408	-2.41148	0.161144	-14.9648	1.25e-50	3.05e-49	GXYLT2		ENSG00000176092	88.1494	0.92137	0.216085	4.26392	2.01e-05	6.67e-05	CRYBG2
ENSG00000077942	317.648	-2.41121	0.111616	-21.6027	1.69e-103	1.27e-101	FBLN1		ENSG00000133477	1612.22	0.921504	0.0831209	11.0863	1.46e-28	1.8e-27	FAM83F
ENSG00000276649	5.49638	-2.40854	0.962333	-2.50281	0.0123212	0.0280981	AL117335.1		ENSG00000113430	1876.24	0.921874	0.0544082	16.9436	2.14e-64	7.39e-63	IRX4
ENSG00000182534	731.607	-2.40696	0.0865263	-27.8177	2.65e-170	5.32e-168	MXRA7		ENSG00000254428	64.3853	0.921934	0.248728	3.7066	0.000210064	0.000621221	AP003392.1
ENSG00000240520	3.7953	-2.40477	0.951113	-2.52837	0.0114594	0.0263051	UOX		ENSG00000160862	707.509	0.922127	0.163695	5.6332	1.77e-08	7.7e-08	AZGP1
ENSG00000153071	53.4741	-2.40447	0.293532	-8.19151	2.58e-16	1.83e-15	DAB2		ENSG00000261716	1025.34	0.922185	0.0575066	16.0362	7.14e-58	2.07e-56	HIST2H2BC
ENSG00000156052	612.032	-2.40421	0.0838402	-28.6762	7.56e-181	1.79e-178	GNAQ		ENSG00000247373	151.606	0.922209	0.138265	6.66988	2.56e-11	1.37e-10	TMED2-DT
ENSG00000230606	23.8323	-2.40404	0.411806	-5.8378	5.29e-09	2.39e-08	AC092683.1		ENSG00000274698	32.9582	0.923082	0.349847	2.63853	0.00832656	0.0196182	AC099521.1
ENSG00000105664	37.9974	-2.4029	0.293285	-8.19307	2.55e-16	1.81e-15	COMP		ENSG00000153303	134.795	0.923865	0.173487	5.32528	1.01e-07	4.14e-07	FRMD1
ENSG00000186854	5.54657	-2.40256	0.774955	-3.10026	0.00193349	0.00503539	TRABD2A		ENSG00000161509	1636.94	0.924504	0.0632581	14.6148	2.26e-48	5.22e-47	GRIN2C
ENSG00000012779	7.7215	-2.40109	0.707113	-3.39563	0.00068472	0.00189965	ALOX5		ENSG00000150667	103.875	0.924506	0.164446	5.62194	1.89e-08	8.19e-08	FSIP1
ENSG00000154310	774.618	-2.401	0.0688082	-34.894	9.15e-267	5.99e-264	TNIK		ENSG00000170421	9301.63	0.924669	0.0425981	21.7068	1.77e-104	1.35e-102	KRT8
ENSG00000072182	6.25247	-2.39471	0.70849	-3.38002	0.000724807	0.00200359	ASIC4		ENSG00000171236	427.673	0.925571	0.111674	8.28817	1.15e-16	8.31e-16	LRG1
ENSG00000006071	47.1325	-2.3939	0.260359	-9.19465	3.76e-20	3.21e-19	ABCC8		ENSG00000265298	67.0607	0.925673	0.220204	4.20371	2.63e-05	8.62e-05	AC132812.1
ENSG00000255362	6.88026	-2.39381	0.695346	-3.44262	0.000576109	0.00161265	LINC02761		ENSG00000248866	124.58	0.926167	0.156584	5.91484	3.32e-09	1.53e-08	USP46-AS1
ENSG00000118557	23.3615	-2.39373	0.360678	-6.63675	3.21e-11	1.7e-10	PMFBP1		ENSG00000141574	565.338	0.926302	0.095151	9.73508	2.14e-22	2.03e-21	SECTM1
ENSG00000224940	72.2402	-2.39323	0.227952	-10.4988	8.75e-26	9.63e-25	PRRT4		ENSG00000010278	8422.56	0.926322	0.0469858	19.715	1.6e-86	8.86e-85	CD9
ENSG00000024422	23.1534	-2.39317	0.437881	-5.46533	4.62e-08	1.95e-07	EHD2		ENSG00000205336	1908.44	0.926411	0.0840648	11.0202	3.05e-28	3.72e-27	ADGRG1
ENSG00000083535	417.337	-2.39225	0.100362	-23.8363	1.41e-125	1.5e-123	PIBF1		ENSG00000242828	44.6667	0.926938	0.246687	3.75754	0.000171591	0.000513243	AC068756.1
ENSG00000256546	80.1647	-2.39033	0.211773	-11.2872	1.52e-29	1.94e-28	AC156455.1		ENSG00000115616	869.653	0.927091	0.0727159	12.7495	3.14e-37	5.17e-36	SLC9A2
ENSG00000145428	6.04004	-2.38485	0.701577	-3.39927	0.000675667	0.00187605	RNF175		ENSG00000204860	400.847	0.927409	0.0946983	9.7933	1.2e-22	1.16e-21	FAM201A
ENSG00000225439	94.7946	-2.38457	0.193838	-12.3019	8.85e-35	1.35e-33	BOLA3-AS1		ENSG00000230359	131.119	0.927613	0.164023	5.65538	1.56e-08	6.78e-08	TPI1P2
ENSG00000184500	115.07	-2.38423	0.179994	-13.2462	4.75e-40	8.54e-39	PROS1		ENSG00000055813	125.271	0.927775	0.198748	4.66809	3.04e-06	1.09e-05	CCDC85A
ENSG00000137101	33.2283	-2.38398	0.340202	-7.00753	2.43e-12	1.38e-11	CD72		ENSG00000110090	4576.85	0.929113	0.0393794	23.5939	4.46e-123	4.59e-121	CPT1A
ENSG00000231187	8.83461	-2.38354	0.607577	-3.92303	8.74e-05	0.00027166	AL356056.2		ENSG00000162366	619.344	0.929757	0.0999064	9.30628	1.32e-20	1.15e-19	PDZK1IP1
ENSG00000162738	295.896	-2.37975	0.118677	-20.0524	1.93e-89	1.12e-87	VANGL2		ENSG00000166348	3633.22	0.929856	0.055288	16.8184	1.79e-63	5.97e-62	USP54
ENSG00000077092	240.671	-2.37848	0.124704	-19.073	4.23e-81	2.1e-79	RARB		ENSG00000124788	1601.64	0.930508	0.0472093	19.7103	1.76e-86	9.69e-85	ATXN1
ENSG00000197747	259.774	-2.37649	0.14493	-16.3976	1.99e-60	6.13e-59	S100A10		ENSG00000135373	10714.2	0.930639	0.0368571	25.2499	1.13e-140	1.54e-138	EHF
ENSG00000075826	196.068	-2.37618	0.167547	-14.1822	1.18e-45	2.49e-44	SEC31B		ENSG00000263597	39.9244	0.930742	0.27672	3.36348	0.000769668	0.00212141	MIR3936
ENSG00000140968	59.298	-2.37568	0.306917	-7.74048	9.9e-15	6.47e-14	IRF8		ENSG00000164690	16.0619	0.931048	0.357964	2.60095	0.00929651	0.0216953	SHH
ENSG00000005059	282.904	-2.37476	0.139945	-16.9692	1.39e-64	4.8e-63	MCUB		ENSG00000224616	175.536	0.931127	0.134883	6.90323	5.08e-12	2.84e-11	RTCA-AS1
ENSG00000169184	38.5812	-2.37467	0.289696	-8.1971	2.46e-16	1.75e-15	MN1		ENSG00000275880	22.5912	0.931232	0.389107	2.39325	0.0166997	0.0369668	AL139385.1
ENSG00000270223	70.4505	-2.37236	0.220469	-10.7605	5.29e-27	6.14e-26	#N/A		ENSG00000253773	28.7075	0.931348	0.382631	2.43407	0.0149302	0.033441	C8orf37-AS1
ENSG00000153157	34.8462	-2.37151	0.33433	-7.09331	1.31e-12	7.59e-12	SYCP2L		ENSG00000125850	391.805	0.931471	0.106821	8.71993	2.78e-18	2.18e-17	OVOL2
ENSG00000138795	164.3	-2.37042	0.145244	-16.3203	7.08e-60	2.16e-58	LEF1		ENSG00000196275	224.801	0.932083	0.133797	6.96642	3.25e-12	1.84e-11	GTF2IRD2
ENSG00000204516	66.7539	-2.3682	0.255364	-9.27381	1.8e-20	1.55e-19	MICB		ENSG00000266680	35.957	0.932656	0.304803	3.05986	0.00221438	0.00571385	AL135905.1
ENSG00000116329	31.7596	-2.36702	0.40193	-5.88913	3.88e-09	1.77e-08	OPRD1		ENSG00000023445	107.277	0.932681	0.181312	5.14405	2.69e-07	1.07e-06	BIRC3
ENSG00000256235	58.9742	-2.3659	0.251342	-9.41304	4.82e-21	4.28e-20	SMIM3		ENSG00000245105	28.5259	0.932696	0.311723	2.99206	0.00277097	0.00705406	A2M-AS1
ENSG00000196437	195.189	-2.36401	0.135332	-17.4682	2.5e-68	9.3e-67	ZNF569		ENSG00000261526	109.582	0.933131	0.173374	5.38219	7.36e-08	3.05e-07	AC012615.1
ENSG00000110693	76.3897	-2.36107	0.208504	-11.3238	1e-29	1.28e-28	SOX6		ENSG00000136052	463.51	0.93345	0.0969742	9.62576	6.22e-22	5.78e-21	SLC41A2
ENSG00000279838	4.15489	-2.36027	0.878404	-2.68699	0.00720984	0.017183	AL356273.3		ENSG00000130701	325.274	0.933705	0.104612	8.92542	4.44e-19	3.61e-18	RBBP8NL
ENSG00000197106	34.8682	-2.35918	0.328289	-7.18628	6.66e-13	3.93e-12	SLC6A17		ENSG00000176871	5635.46	0.933796	0.0535953	17.4231	5.51e-68	2.03e-66	WSB2
ENSG00000133135	150.376	-2.35885	0.176881	-13.3358	1.43e-40	2.63e-39	RNF128		ENSG00000057593	92.0305	0.933871	0.182914	5.10552	3.3e-07	1.3e-06	F7
ENSG00000158473	8.22947	-2.35841	0.647243	-3.64378	0.000268661	0.000783967	CD1D		ENSG00000135423	124.295	0.933946	0.165263	5.65128	1.59e-08	6.94e-08	GLS2
ENSG00000066405	5.67381	-2.35807	0.758868	-3.10735	0.00188773	0.00492227	CLDN18		ENSG00000175497	167.473	0.933957	0.149029	6.26694	3.68e-10	1.81e-09	DPP10
ENSG00000146267	157.686	-2.35712	0.142806	-16.5058	3.34e-61	1.04e-59	FAXC		ENSG00000102699	5672.2	0.934134	0.0481254	19.4104	6.3e-84	3.33e-82	PARP4
ENSG00000111186	48.6491	-2.35367	0.281492	-8.3614	6.2e-17	4.55e-16	WNT5B		ENSG00000225234	25.6533	0.93474	0.382953	2.44087	0.0146517	0.0328835	TRAPPC12-AS1
ENSG00000234899	4.71527	-2.35297	0.857498	-2.744	0.00606964	0.0146644	SOX9-AS1		ENSG00000125089	440.739	0.934766	0.0847723	11.0268	2.84e-28	3.46e-27	SH3TC1
ENSG00000266865	36.3851	-2.3524	0.308436	-7.62688	2.41e-14	1.54e-13	AC138207.8		ENSG00000257815	59.9877	0.934815	0.233439	4.00454	6.21e-05	0.000196077	AC025159.1
ENSG00000178498	189.152	-2.34975	0.14915	-15.7542	6.42e-56	1.8e-54	DTX3		ENSG00000231234	34.4432	0.934832	0.284707	3.28348	0.00102533	0.00277954	SKP1P1
ENSG00000259683	20.8897	-2.34872	0.416312	-5.64173	1.68e-08	7.33e-08	AC243562.2		ENSG00000171368	477.794	0.935727	0.0938102	9.97469	1.97e-23	1.96e-22	TPPP
ENSG00000164362	99.8407	-2.34779	0.238607	-9.83957	7.6e-23	7.39e-22	TERT		ENSG00000161905	3017.67	0.935853	0.050941	18.3713	2.23e-75	9.75e-74	ALOX15
ENSG00000260430	5.48663	-2.34728	0.731795	-3.20757	0.00133862	0.00357387	AC099518.1		ENSG00000137747	379.348	0.936088	0.0881953	10.6138	2.57e-26	2.9e-25	TMPRSS13
ENSG00000263146	13.516	-2.34578	0.488135	-4.80559	1.54e-06	5.7e-06	LINC01896		ENSG00000250387	209.237	0.936282	0.160984	5.81598	6.03e-09	2.72e-08	LINC02197
ENSG00000105409	419.286	-2.34303	0.12593	-18.6058	2.88e-77	1.31e-75	ATP1A3		ENSG00000229715	41.6959	0.936355	0.312004	3.0011	0.00269006	0.00685951	EEF1DP3
ENSG00000128602	515.812	-2.34106	0.0966618	-24.219	1.4e-129	1.59e-127	SMO		ENSG00000205220	76.1639	0.936615	0.194547	4.81434	1.48e-06	5.47e-06	PSMB10
ENSG00000172318	4.11615	-2.34096	0.913606	-2.56233	0.0103972	0.0240394	B3GALT1		ENSG00000224906	22.4081	0.93672	0.381682	2.45419	0.0141204	0.0318	SRP14P1
ENSG00000122861	5.60241	-2.33927	0.790459	-2.95938	0.00308263	0.00779189	PLAU		ENSG00000106330	1113.69	0.936767	0.0841781	11.1284	9.13e-29	1.13e-27	MOSPD3
ENSG00000077522	34.3439	-2.33835	0.324499	-7.20603	5.76e-13	3.41e-12	ACTN2		ENSG00000171940	6269.86	0.937795	0.0525014	17.8623	2.32e-71	9.31e-70	ZNF217
ENSG00000184985	15.997	-2.33533	0.460723	-5.06885	4e-07	1.57e-06	SORCS2		ENSG00000272264	28.295	0.937813	0.384746	2.43749	0.0147897	0.033158	AC009686.2
ENSG00000105963	58.2125	-2.33286	0.23387	-9.97503	1.96e-23	1.95e-22	ADAP1		ENSG00000224141	212.997	0.938002	0.115947	8.08993	5.97e-16	4.16e-15	MIR548XHG
ENSG00000128268	102.109	-2.33229	0.221463	-10.5313	6.2e-26	6.88e-25	MGAT3		ENSG00000167799	1356.49	0.938737	0.0672798	13.9527	3.03e-44	6.09e-43	NUDT8
ENSG00000154553	78.7391	-2.32659	0.217888	-10.6779	1.29e-26	1.48e-25	PDLIM3		ENSG00000178773	1666.62	0.938893	0.0682908	13.7485	5.2e-43	1.02e-41	CPNE7
ENSG00000092853	569.913	-2.32626	0.110809	-20.9935	7.52e-98	5.06e-96	CLSPN		ENSG00000151224	546.169	0.938965	0.0727999	12.8979	4.63e-38	7.83e-37	MAT1A
ENSG00000158427	17.6613	-2.32593	0.461789	-5.03678	4.73e-07	1.84e-06	TMSB15B		ENSG00000221990	478.054	0.940053	0.097821	9.60993	7.26e-22	6.72e-21	EXOC3-AS1
ENSG00000129204	7.26307	-2.32472	0.655389	-3.54708	0.000389529	0.00111559	USP6		ENSG00000206344	25.3025	0.940518	0.354231	2.6551	0.0079286	0.0187594	HCG27
ENSG00000259485	19.7504	-2.32295	0.405725	-5.72544	1.03e-08	4.57e-08	LINC02253		ENSG00000234177	173.685	0.940547	0.135376	6.94765	3.71e-12	2.1e-11	LINC01114
ENSG00000264204	7.14454	-2.3189	0.709101	-3.2702	0.00107473	0.00290343	AGAP7P		ENSG00000172183	351.795	0.940633	0.120025	7.83696	4.62e-15	3.07e-14	ISG20
ENSG00000187140	73.802	-2.31746	0.224444	-10.3253	5.41e-25	5.75e-24	FOXD3		ENSG00000187566	69.6947	0.940641	0.223647	4.20592	2.6e-05	8.54e-05	NHLRC1
ENSG00000153790	94.9654	-2.31648	0.183157	-12.6475	1.16e-36	1.86e-35	C7orf31		ENSG00000178467	1423.62	0.941584	0.0532538	17.6811	5.87e-70	2.26e-68	P4HTM
ENSG00000114698	10.6622	-2.31574	0.571796	-4.04995	5.12e-05	0.000163361	PLSCR4		ENSG00000139832	535.606	0.941799	0.0881576	10.6831	1.22e-26	1.4e-25	RAB20
ENSG00000280219	5.33615	-2.31401	0.802242	-2.88443	0.00392124	0.00978298	AC093908.1		ENSG00000225083	40.5175	0.941819	0.315876	2.98161	0.00286736	0.00728528	GRTP1-AS1
ENSG00000163453	15.3574	-2.31374	0.469055	-4.93277	8.11e-07	3.08e-06	IGFBP7		ENSG00000278970	685.395	0.941892	0.0805161	11.6982	1.3e-31	1.79e-30	HEIH
ENSG00000237686	119.342	-2.31297	0.300943	-7.68574	1.52e-14	9.8e-14	AL109615.3		ENSG00000233765	16.1209	0.942325	0.414184	2.27514	0.0228976	0.0490974	AL591479.1
ENSG00000271109	15.9332	-2.31122	0.525409	-4.39889	1.09e-05	3.71e-05	AC008555.4		ENSG00000246876	28.757	0.942423	0.319839	2.94656	0.00321334	0.00810347	LINC02466
ENSG00000171954	6.50069	-2.31091	0.727549	-3.17629	0.0014917	0.00395451	CYP4F22		ENSG00000136149	72.0605	0.942543	0.252703	3.72984	0.000191599	0.000569187	RPL13AP25
ENSG00000257869	7.86009	-2.3101	0.712718	-3.24125	0.00119008	0.00319965	AL139023.1		ENSG00000253930	38.4157	0.94311	0.298419	3.16035	0.00157578	0.00415897	TNFRSF10A-AS1
ENSG00000065675	30.5639	-2.30883	0.363752	-6.34725	2.19e-10	1.1e-09	PRKCQ		ENSG00000164379	34.4118	0.943251	0.37665	2.50432	0.0122689	0.0279973	FOXQ1
ENSG00000153162	69.3713	-2.30862	0.239561	-9.63687	5.59e-22	5.2e-21	BMP6		ENSG00000183161	991.53	0.943291	0.0648655	14.5423	6.54e-48	1.49e-46	FANCF
ENSG00000180113	11.2381	-2.30658	0.599628	-3.84669	0.000119724	0.000365868	TDRD6		ENSG00000255346	138.256	0.943532	0.196698	4.79685	1.61e-06	5.95e-06	NOX5
ENSG00000138411	83.5929	-2.30619	0.196559	-11.7328	8.66e-32	1.2e-30	HECW2		ENSG00000130518	108.071	0.943648	0.192723	4.89639	9.76e-07	3.68e-06	IQCN
ENSG00000138944	86.502	-2.305	0.193639	-11.9036	1.13e-32	1.61e-31	SHISAL1		ENSG00000244998	16.4241	0.943745	0.414729	2.27557	0.0228716	0.0490455	AC100803.2
ENSG00000213199	89.9631	-2.30019	0.244155	-9.42101	4.47e-21	3.98e-20	ASIC3		ENSG00000135048	1143.99	0.944246	0.0598793	15.7691	5.07e-56	1.43e-54	CEMIP2
ENSG00000204789	178.987	-2.3	0.164585	-13.9746	2.23e-44	4.51e-43	ZNF204P		ENSG00000096968	469.364	0.94453	0.0912522	10.3508	4.15e-25	4.43e-24	JAK2
ENSG00000144395	182.322	-2.29834	0.134354	-17.1066	1.33e-65	4.71e-64	CCDC150		ENSG00000181392	961.843	0.945015	0.0735016	12.8571	7.85e-38	1.32e-36	SYNE4
ENSG00000187815	97.4411	-2.29833	0.187556	-12.2541	1.6e-34	2.41e-33	ZFP69		ENSG00000184524	28.0988	0.945039	0.323921	2.91749	0.00352856	0.00885473	CEND1
ENSG00000140876	28.9588	-2.29816	0.350177	-6.56285	5.28e-11	2.76e-10	NUDT7		ENSG00000253404	66.3859	0.945116	0.237218	3.98417	6.77e-05	0.000212806	AC034243.1
ENSG00000180044	44.9985	-2.29627	0.261241	-8.78985	1.5e-18	1.19e-17	C3orf80		ENSG00000186088	441.503	0.945877	0.0861383	10.9809	4.72e-28	5.71e-27	GSAP
ENSG00000205363	63.1142	-2.2958	0.219626	-10.4532	1.42e-25	1.54e-24	INSYN1		ENSG00000279306	23.2229	0.946321	0.366893	2.57928	0.00990062	0.0229725	AL139288.2
ENSG00000243244	49.5698	-2.29555	0.267638	-8.57709	9.73e-18	7.43e-17	STON1		ENSG00000257084	50.0809	0.94643	0.266659	3.54921	0.000386383	0.00110692	MIR200CHG
ENSG00000132718	17.7856	-2.29373	0.439505	-5.2189	1.8e-07	7.24e-07	SYT11		ENSG00000210194	43.6035	0.94677	0.317356	2.98331	0.00285149	0.00724696	MT-TE
ENSG00000140470	61.6719	-2.29301	0.252443	-9.08329	1.05e-19	8.82e-19	ADAMTS17		ENSG00000167106	2633.62	0.946863	0.0612421	15.461	6.36e-54	1.7e-52	FAM102A
ENSG00000161249	1069.36	-2.29283	0.07559	-30.3324	4.28e-202	1.28e-199	DMKN		ENSG00000278919	50.2284	0.946957	0.23494	4.03063	5.56e-05	0.000176711	#N/A
ENSG00000145248	9.71	-2.29264	0.597531	-3.83686	0.000124617	0.000379973	SLC10A4		ENSG00000130429	8028.96	0.946967	0.052277	18.1144	2.45e-73	1.02e-71	ARPC1B
ENSG00000144152	10.6509	-2.29264	0.536492	-4.27339	1.93e-05	6.41e-05	FBLN7		ENSG00000196684	144.492	0.947523	0.16944	5.59208	2.24e-08	9.69e-08	HSH2D
ENSG00000131378	69.1999	-2.29208	0.232688	-9.85045	6.82e-23	6.66e-22	RFTN1		ENSG00000261514	95.4201	0.947564	0.21091	4.49274	7.03e-06	2.44e-05	LINC01976
ENSG00000046889	55.7635	-2.29172	0.268496	-8.53538	1.4e-17	1.06e-16	PREX2		ENSG00000223564	288.846	0.948236	0.125905	7.53138	5.02e-14	3.16e-13	CYP4F32P
ENSG00000125848	51.5259	-2.29021	0.28969	-7.90573	2.66e-15	1.79e-14	FLRT3		ENSG00000228798	151.542	0.948764	0.143171	6.62679	3.43e-11	1.82e-10	#N/A
ENSG00000187824	27.6892	-2.2877	0.39835	-5.74295	9.3e-09	4.13e-08	TMEM220		ENSG00000280649	80.9387	0.949106	0.213895	4.43725	9.11e-06	3.13e-05	AC245100.7
ENSG00000233435	7.31946	-2.2869	0.729001	-3.13703	0.00170667	0.00447863	AGGF1P2		ENSG00000139192	273.284	0.949133	0.123349	7.69468	1.42e-14	9.16e-14	TAPBPL
ENSG00000156463	10.7996	-2.2853	0.587971	-3.88676	0.000101591	0.000312782	SH3RF2		ENSG00000129194	53.732	0.949182	0.234474	4.04814	5.16e-05	0.000164534	SOX15
ENSG00000020181	250.501	-2.28456	0.108179	-21.1183	5.39e-99	3.7e-97	ADGRA2		ENSG00000155066	2346.91	0.94934	0.0660205	14.3795	6.96e-47	1.53e-45	PROM2
ENSG00000169783	209.828	-2.28021	0.135962	-16.771	3.98e-63	1.32e-61	LINGO1		ENSG00000260018	133.426	0.949628	0.18359	5.17255	2.31e-07	9.22e-07	AC040169.1
ENSG00000230319	4.06719	-2.27938	0.979965	-2.32598	0.0200196	0.0434826	AL022476.1		ENSG00000219693	24.9234	0.949629	0.362621	2.61879	0.00882422	0.0206809	FGF7P8
ENSG00000168916	164.031	-2.27827	0.153144	-14.8767	4.67e-50	1.13e-48	ZNF608		ENSG00000164713	3638.44	0.949809	0.150605	6.30662	2.85e-10	1.41e-09	BRI3
ENSG00000107485	108.157	-2.27625	0.196478	-11.5853	4.89e-31	6.58e-30	GATA3		ENSG00000157617	1155.24	0.94982	0.0660833	14.3731	7.64e-47	1.67e-45	C2CD2
ENSG00000270460	4.46087	-2.27495	0.931239	-2.44293	0.0145685	0.0327182	AC106900.1		ENSG00000110680	24.9668	0.950368	0.31223	3.04381	0.00233602	0.00600687	CALCA
ENSG00000164099	88.5669	-2.2742	0.188031	-12.0948	1.13e-33	1.66e-32	PRSS12		ENSG00000273080	59.7642	0.950394	0.273715	3.47221	0.000516195	0.00145337	AC009309.1
ENSG00000234695	4.10669	-2.27354	0.914208	-2.48689	0.0128864	0.0292752	AC002076.1		ENSG00000127415	755.102	0.950416	0.0960719	9.89276	4.48e-23	4.4e-22	IDUA
ENSG00000259658	7.49042	-2.26658	0.709007	-3.19684	0.00138943	0.00370267	AC027559.1		ENSG00000170381	1793.34	0.950529	0.0544502	17.4569	3.05e-68	1.13e-66	SEMA3E
ENSG00000105641	10.8574	-2.2648	0.605314	-3.74152	0.000182909	0.000544841	SLC5A5		ENSG00000147689	21.4447	0.951335	0.381608	2.49296	0.0126682	0.0288391	FAM83A
ENSG00000143469	66.2891	-2.26367	0.214003	-10.5778	3.78e-26	4.22e-25	SYT14		ENSG00000138600	2931.81	0.951407	0.0423131	22.4849	5.83e-112	4.94e-110	SPPL2A
ENSG00000171357	4.67049	-2.26042	0.830538	-2.72164	0.00649594	0.0156142	LURAP1		ENSG00000189334	18.4373	0.951445	0.349426	2.72288	0.0064716	0.0155598	S100A14
ENSG00000139219	122.393	-2.26016	0.178106	-12.69	6.72e-37	1.09e-35	COL2A1		ENSG00000177943	711.172	0.951591	0.0686662	13.8582	1.13e-43	2.25e-42	MAMDC4
ENSG00000167549	42.4272	-2.25983	0.321616	-7.02648	2.12e-12	1.21e-11	CORO6		ENSG00000203280	99.3154	0.951741	0.228123	4.17205	3.02e-05	9.85e-05	AL022323.1
ENSG00000144649	50.6603	-2.25838	0.26396	-8.55578	1.17e-17	8.92e-17	GASK1A		ENSG00000181218	616.137	0.951939	0.0995641	9.56107	1.17e-21	1.07e-20	HIST3H2A
ENSG00000138395	3.2531	-2.25728	0.98992	-2.28026	0.0225921	0.0485105	CDK15		ENSG00000163694	3693.89	0.952292	0.0451735	21.0808	1.19e-98	8.15e-97	RBM47
ENSG00000214578	4.66455	-2.25568	0.90685	-2.48738	0.0128688	0.0292432	HMGN2P15		ENSG00000112706	39.1451	0.952482	0.298295	3.19308	0.00140762	0.00374752	IMPG1
ENSG00000250982	7.10183	-2.25412	0.709322	-3.17785	0.00148373	0.00393604	GAPDHP35		ENSG00000251562	6392.27	0.952741	0.116924	8.1484	3.69e-16	2.59e-15	MALAT1
ENSG00000260777	8.021	-2.25386	0.666234	-3.38298	0.00071704	0.00198371	AC061975.1		ENSG00000237441	2471.7	0.953494	0.0560033	17.0257	5.3e-65	1.85e-63	RGL2
ENSG00000206120	7.41139	-2.25223	0.683645	-3.29444	0.000986188	0.00267872	EGFEM1P		ENSG00000100583	160.859	0.954034	0.131708	7.24357	4.37e-13	2.6e-12	SAMD15
ENSG00000080644	25.5561	-2.25178	0.370652	-6.07518	1.24e-09	5.87e-09	CHRNA3		ENSG00000095627	51.3964	0.954233	0.274223	3.47978	0.000501832	0.00141612	TDRD1
ENSG00000112118	3119.36	-2.25017	0.0455334	-49.418	0	0	MCM3		ENSG00000174292	433.692	0.95451	0.101858	9.37101	7.18e-21	6.33e-20	TNK1
ENSG00000133067	36.7848	-2.25013	0.29305	-7.67832	1.61e-14	1.04e-13	LGR6		ENSG00000272106	627.521	0.95467	0.0717662	13.3025	2.24e-40	4.08e-39	AL691432.2
ENSG00000161082	36.5931	-2.24808	0.29911	-7.51589	5.65e-14	3.54e-13	CELF5		ENSG00000119888	2926.44	0.955231	0.0506455	18.8611	2.38e-79	1.14e-77	EPCAM
ENSG00000212237	6.75068	-2.24745	0.771055	-2.91477	0.00355949	0.00892665	RNA5SP18		ENSG00000273015	1081.73	0.95631	0.06221	15.3723	2.51e-53	6.64e-52	AC008124.1
ENSG00000213963	39.5029	-2.24631	0.341111	-6.58527	4.54e-11	2.38e-10	AC019080.1		ENSG00000183671	168.919	0.956386	0.129278	7.3979	1.38e-13	8.47e-13	GPR1
ENSG00000241106	5.95719	-2.24612	0.836544	-2.68499	0.00725314	0.0172787	HLA-DOB		ENSG00000253692	164.088	0.956592	0.180644	5.29546	1.19e-07	4.85e-07	IGHEP1
ENSG00000140835	4.59702	-2.24306	0.764262	-2.93493	0.00333621	0.00839579	CHST4		ENSG00000016402	131.1	0.956617	0.182199	5.25038	1.52e-07	6.14e-07	IL20RA
ENSG00000004799	14.5604	-2.24154	0.466723	-4.80272	1.57e-06	5.78e-06	PDK4		ENSG00000187583	257.904	0.956895	0.124137	7.70838	1.27e-14	8.26e-14	PLEKHN1
ENSG00000227507	4.48166	-2.24017	0.822173	-2.72469	0.00643614	0.0154827	LTB		ENSG00000229097	28.5937	0.957027	0.317796	3.01145	0.00260005	0.00664542	CALM2P2
ENSG00000232712	6.72959	-2.23551	0.670025	-3.33645	0.000848552	0.00232369	KIZ-AS1		ENSG00000157601	74.6412	0.957043	0.203326	4.70694	2.51e-06	9.13e-06	MX1
ENSG00000167460	1237.64	-2.23527	0.0632052	-35.3654	5.82e-274	4.21e-271	TPM4		ENSG00000265055	32.0638	0.957131	0.347759	2.75228	0.00591811	0.0143231	AC145343.1
ENSG00000163430	1097.42	-2.23512	0.0786602	-28.4149	1.32e-177	2.91e-175	FSTL1		ENSG00000235863	343.139	0.957239	0.123642	7.74205	9.78e-15	6.39e-14	B3GALT4
ENSG00000104738	3701.08	-2.23414	0.0561242	-39.807	0	0	MCM4		ENSG00000260464	67.0059	0.957332	0.199749	4.79267	1.65e-06	6.07e-06	AL049796.1
ENSG00000154118	150.035	-2.23227	0.154854	-14.4153	4.15e-47	9.17e-46	JPH3		ENSG00000260260	625.413	0.95756	0.265321	3.60906	0.000307309	0.000891259	SNHG19
ENSG00000106004	627.478	-2.22941	0.0773784	-28.8117	1.53e-182	3.72e-180	HOXA5		ENSG00000145012	2535	0.957613	0.0710925	13.47	2.35e-41	4.42e-40	LPP
ENSG00000146216	7.97901	-2.22939	0.701911	-3.17617	0.00149234	0.00395582	TTBK1		ENSG00000276600	75.6973	0.958051	0.203889	4.69887	2.62e-06	9.48e-06	RAB7B
ENSG00000197299	518.223	-2.2223	0.0912848	-24.3447	6.6e-131	7.57e-129	BLM		ENSG00000005238	754.731	0.958182	0.0728077	13.1604	1.48e-39	2.62e-38	FAM214B
ENSG00000184224	7.75572	-2.2202	0.609942	-3.64002	0.000272613	0.000794573	C11orf72		ENSG00000205744	1303.69	0.959371	0.0829514	11.5655	6.17e-31	8.28e-30	DENND1C
ENSG00000185272	58.7042	-2.22019	0.237668	-9.34156	9.49e-21	8.31e-20	RBM11		ENSG00000164855	2956.4	0.959798	0.0612701	15.665	2.62e-55	7.26e-54	TMEM184A
ENSG00000196436	17.1061	-2.21713	0.437675	-5.0657	4.07e-07	1.59e-06	NPIPB15		ENSG00000106484	1405.99	0.960052	0.0532198	18.0394	9.56e-73	3.96e-71	MEST
ENSG00000244349	8.44476	-2.21275	0.720841	-3.06967	0.00214293	0.00554251	AL662791.1		ENSG00000223991	19.417	0.960087	0.361121	2.65863	0.00784595	0.0185814	AC104809.1
ENSG00000112139	54.1645	-2.21056	0.267618	-8.26014	1.46e-16	1.05e-15	MDGA1		ENSG00000175985	406.86	0.960246	0.117692	8.15896	3.38e-16	2.38e-15	PLEKHD1
ENSG00000156427	8.48509	-2.20778	0.676278	-3.26461	0.00109617	0.00295816	FGF18		ENSG00000279692	277.21	0.960299	0.10108	9.50036	2.09e-21	1.89e-20	AC110285.6
ENSG00000116793	134.143	-2.206	0.15069	-14.6393	1.58e-48	3.66e-47	PHTF1		ENSG00000253369	37.5259	0.960515	0.268934	3.57156	0.00035486	0.00102194	AC022034.3
ENSG00000246985	51.7458	-2.2047	0.344628	-6.39733	1.58e-10	7.99e-10	SOCS2-AS1		ENSG00000130957	17.5229	0.961254	0.380129	2.52876	0.0114467	0.0262803	FBP2
ENSG00000007237	44.0864	-2.20464	0.27708	-7.95666	1.77e-15	1.2e-14	GAS7		ENSG00000119684	1027.52	0.961973	0.0642032	14.9833	9.45e-51	2.32e-49	MLH3
ENSG00000269918	17.7103	-2.20405	0.45588	-4.83471	1.33e-06	4.96e-06	AF131215.6		ENSG00000282386	38.3197	0.96205	0.279872	3.43746	0.000587196	0.00164185	AL358472.4
ENSG00000088881	184.561	-2.20319	0.14926	-14.7608	2.62e-49	6.21e-48	EBF4		ENSG00000124713	332.058	0.962142	0.152571	6.30619	2.86e-10	1.42e-09	GNMT
ENSG00000130035	6.5676	-2.20195	0.809214	-2.7211	0.00650646	0.0156313	GALNT8		ENSG00000223396	317.725	0.962301	0.102158	9.41973	4.52e-21	4.03e-20	RPS10P7
ENSG00000159713	16.5665	-2.20114	0.460713	-4.77768	1.77e-06	6.52e-06	TPPP3		ENSG00000083307	2988.91	0.962311	0.0561742	17.1308	8.74e-66	3.12e-64	GRHL2
ENSG00000089327	272.327	-2.20041	0.131595	-16.7211	9.2e-63	3e-61	FXYD5		ENSG00000185340	1889.08	0.962485	0.0649178	14.8262	9.92e-50	2.37e-48	GAS2L1
ENSG00000104853	653.397	-2.19984	0.0874026	-25.169	8.75e-140	1.15e-137	CLPTM1		ENSG00000179178	2153.98	0.96328	0.0490192	19.6511	5.66e-86	3.08e-84	TMEM125
ENSG00000203995	164.336	-2.19898	0.139833	-15.7258	1.01e-55	2.82e-54	ZYG11A		ENSG00000260618	41.3219	0.963335	0.279622	3.44513	0.000570789	0.00159824	AC025917.1
ENSG00000255310	33.2435	-2.19745	0.342706	-6.41204	1.44e-10	7.27e-10	AF131215.5		ENSG00000279516	186.968	0.963383	0.129896	7.41656	1.2e-13	7.4e-13	FAM230C
ENSG00000280353	6.51175	-2.19214	0.696542	-3.14717	0.00164857	0.00433858	AC011466.4		ENSG00000225057	62.01	0.963424	0.23785	4.05055	5.11e-05	0.000163018	AC012485.1
ENSG00000094804	1858.81	-2.19171	0.0689817	-31.7724	1.56e-221	6.03e-219	CDC6		ENSG00000144115	1141.08	0.964244	0.0622142	15.4988	3.54e-54	9.47e-53	THNSL2
ENSG00000217236	40.1776	-2.19096	0.305152	-7.17991	6.98e-13	4.11e-12	SP9		ENSG00000125968	292.921	0.96443	0.276765	3.48465	0.000492779	0.00139229	ID1
ENSG00000119782	14.4448	-2.19037	0.530983	-4.12513	3.71e-05	0.000119992	FKBP1B		ENSG00000233930	72.7477	0.964745	0.182901	5.27469	1.33e-07	5.41e-07	KRTAP5-AS1
ENSG00000205978	79.937	-2.18829	0.207818	-10.5298	6.3e-26	6.98e-25	NYNRIN		ENSG00000186777	58.4984	0.964828	0.268796	3.58944	0.000331386	0.000957954	ZNF732
ENSG00000251247	57.4473	-2.18757	0.238694	-9.16474	4.97e-20	4.21e-19	ZNF345		ENSG00000102981	576.3	0.96546	0.0887065	10.8837	1.38e-27	1.64e-26	PARD6A
ENSG00000145777	17.9802	-2.18739	0.476551	-4.59005	4.43e-06	1.57e-05	TSLP		ENSG00000259405	60.0599	0.96547	0.223599	4.31786	1.58e-05	5.29e-05	ISCA1P4
ENSG00000101230	12.1949	-2.18508	0.504092	-4.33469	1.46e-05	4.92e-05	ISM1		ENSG00000273308	20.3781	0.965841	0.389151	2.48191	0.0130679	0.0296363	AC024560.3
ENSG00000070886	62.2041	-2.17932	0.220883	-9.8664	5.82e-23	5.69e-22	EPHA8		ENSG00000214106	299.107	0.966051	0.116526	8.29044	1.13e-16	8.16e-16	PAXIP1-AS2
ENSG00000219607	16.2785	-2.17903	0.472224	-4.61441	3.94e-06	1.41e-05	PPP1R3G		ENSG00000005001	152.2	0.966899	0.167251	5.78114	7.42e-09	3.32e-08	PRSS22
ENSG00000169439	358.489	-2.1762	0.111297	-19.5531	3.88e-85	2.07e-83	SDC2		ENSG00000216906	23.4463	0.966942	0.324446	2.98029	0.0028798	0.00731417	AL355312.1
ENSG00000225614	15.5127	-2.17451	0.43442	-5.00554	5.57e-07	2.15e-06	ZNF469		ENSG00000279255	30.1852	0.967059	0.33534	2.88381	0.00392891	0.00980124	Z97653.2
ENSG00000204710	81.9926	-2.17446	0.195049	-11.1483	7.3e-29	9.11e-28	SPDYC		ENSG00000204528	15.7982	0.967164	0.422739	2.28785	0.022146	0.0476419	PSORS1C3
ENSG00000258525	11.4635	-2.17388	0.542089	-4.01019	6.07e-05	0.000191735	AL049830.3		ENSG00000159173	174.995	0.968203	0.143397	6.7519	1.46e-11	7.92e-11	TNNI1
ENSG00000215612	173.069	-2.17376	0.20921	-10.3904	2.74e-25	2.95e-24	HMX1		ENSG00000226332	57.579	0.968883	0.266103	3.64101	0.000271567	0.000791607	AL354836.1
ENSG00000014138	1079.81	-2.17174	0.0655505	-33.1308	1.07e-240	5.17e-238	POLA2		ENSG00000196586	13996.4	0.969307	0.038943	24.8904	9.46e-137	1.19e-134	MYO6
ENSG00000129159	61.5352	-2.17098	0.267119	-8.1274	4.39e-16	3.08e-15	KCNC1		ENSG00000259802	291.738	0.970175	0.122607	7.9129	2.51e-15	1.69e-14	AC012640.2
ENSG00000065328	825.307	-2.17016	0.0933964	-23.2361	1.97e-119	1.94e-117	MCM10		ENSG00000132698	2122.61	0.970665	0.0508109	19.1035	2.36e-81	1.18e-79	RAB25
ENSG00000166510	4.18091	-2.17002	0.768689	-2.82301	0.00475747	0.0117183	CCDC68		ENSG00000145934	102.361	0.971713	0.189388	5.13081	2.88e-07	1.14e-06	TENM2
ENSG00000051180	434.746	-2.1692	0.101552	-21.3605	3.12e-101	2.24e-99	RAD51		ENSG00000143365	712.969	0.971757	0.0968283	10.0359	1.06e-23	1.07e-22	RORC
ENSG00000172460	52.7315	-2.16725	0.293452	-7.38536	1.52e-13	9.28e-13	PRSS30P		ENSG00000259146	91.7929	0.971894	0.201857	4.81476	1.47e-06	5.46e-06	AC005476.2
ENSG00000183578	3.39575	-2.1656	0.88061	-2.45921	0.0139245	0.0314052	TNFAIP8L3		ENSG00000267100	1505.43	0.972059	0.0669279	14.524	8.54e-48	1.93e-46	ILF3-DT
ENSG00000087245	27.7522	-2.1627	0.354166	-6.10646	1.02e-09	4.85e-09	MMP2		ENSG00000233483	55.3954	0.972171	0.244205	3.98097	6.86e-05	0.000215467	AC008105.2
ENSG00000275895	21.9393	-2.16159	0.436388	-4.95336	7.29e-07	2.78e-06	U2AF1L5		ENSG00000273139	21.649	0.972975	0.379366	2.56474	0.0103254	0.0238895	AC007663.3
ENSG00000163513	50.4301	-2.16159	0.263822	-8.19336	2.54e-16	1.8e-15	TGFBR2		ENSG00000204179	571.096	0.973008	0.0912581	10.6622	1.53e-26	1.74e-25	PTPN20
ENSG00000119969	740.379	-2.16142	0.0894445	-24.1649	5.21e-129	5.82e-127	HELLS		ENSG00000270021	81.883	0.973057	0.191413	5.08356	3.7e-07	1.46e-06	AC026691.1
ENSG00000087116	69.2999	-2.16092	0.277147	-7.79702	6.34e-15	4.18e-14	ADAMTS2		ENSG00000240204	868.502	0.9737	0.0898092	10.8419	2.18e-27	2.57e-26	SMKR1
ENSG00000101144	441.606	-2.15953	0.0843666	-25.597	1.65e-144	2.38e-142	BMP7		ENSG00000270882	150.405	0.973722	0.144111	6.75674	1.41e-11	7.66e-11	HIST2H4A
ENSG00000188313	192.092	-2.15905	0.132664	-16.2745	1.5e-59	4.52e-58	PLSCR1		ENSG00000136383	235.664	0.973813	0.121331	8.02609	1.01e-15	6.93e-15	ALPK3
ENSG00000173809	13.0366	-2.15901	0.520627	-4.14694	3.37e-05	0.000109468	TDRD12		ENSG00000264334	65.4997	0.974111	0.196195	4.96501	6.87e-07	2.63e-06	AC134978.1
ENSG00000224189	105.008	-2.15875	0.187876	-11.4903	1.48e-30	1.95e-29	HAGLR		ENSG00000137460	835.716	0.974388	0.10204	9.54904	1.31e-21	1.19e-20	FHDC1
ENSG00000234602	42.7467	-2.15783	0.290207	-7.43548	1.04e-13	6.44e-13	MCIDAS		ENSG00000146904	1088.12	0.974551	0.0648251	15.0336	4.43e-51	1.1e-49	EPHA1
ENSG00000073849	156.312	-2.15711	0.178018	-12.1173	8.55e-34	1.27e-32	ST6GAL1		ENSG00000047346	2314.48	0.974972	0.0471499	20.6781	5.45e-95	3.49e-93	FAM214A
ENSG00000183114	14.6517	-2.15614	0.528306	-4.08124	4.48e-05	0.000143933	FAM43B		ENSG00000139725	149.03	0.975494	0.145695	6.69544	2.15e-11	1.15e-10	RHOF
ENSG00000166888	204.183	-2.15491	0.152747	-14.1078	3.4e-45	7.07e-44	STAT6		ENSG00000246526	67.4182	0.975706	0.214868	4.54096	5.6e-06	1.97e-05	LINC002481
ENSG00000164756	9.4464	-2.15469	0.590996	-3.64587	0.000266491	0.000777966	SLC30A8		ENSG00000215068	130.855	0.975723	0.169266	5.76444	8.19e-09	3.65e-08	AC025171.2
ENSG00000271270	197.818	-2.1534	0.135503	-15.892	7.2e-57	2.06e-55	TMCC1-AS1		ENSG00000118640	1054.11	0.976073	0.0933314	10.4581	1.34e-25	1.47e-24	VAMP8
ENSG00000196081	95.0014	-2.15267	0.183797	-11.7122	1.1e-31	1.52e-30	ZNF724		ENSG00000188641	65.8464	0.976209	0.256746	3.80223	0.000143398	0.000433776	DPYD
ENSG00000179397	9.53197	-2.15198	0.621428	-3.46297	0.000534252	0.00150037	CATSPERE		ENSG00000270820	70.0273	0.976608	0.213694	4.57013	4.87e-06	1.72e-05	AC016727.1
ENSG00000257335	6.5436	-2.15162	0.700984	-3.06943	0.00214467	0.00554649	MGAM		ENSG00000246308	14.566	0.976635	0.426567	2.28952	0.0220489	0.0474478	AC116535.1
ENSG00000110811	137.326	-2.1516	0.156823	-13.7199	7.72e-43	1.5e-41	P3H3		ENSG00000168298	168.067	0.976763	0.175982	5.55034	2.85e-08	1.22e-07	HIST1H1E
ENSG00000139344	9.68226	-2.15073	0.517411	-4.15673	3.23e-05	0.000105031	AMDHD1		ENSG00000274641	63.5771	0.976843	0.269742	3.6214	0.000293018	0.000851787	HIST1H2BO
ENSG00000166086	474.001	-2.15028	0.0910813	-23.6084	3.16e-123	3.27e-121	JAM3		ENSG00000130303	3647.29	0.977013	0.0580299	16.8364	1.32e-63	4.44e-62	BST2
ENSG00000278041	97.8824	-2.15002	0.194262	-11.0676	1.8e-28	2.21e-27	AL133325.3		ENSG00000181019	6021.15	0.977675	0.0415602	23.5243	2.3e-122	2.34e-120	NQO1
ENSG00000064218	6.02245	-2.1496	0.673984	-3.1894	0.00142569	0.00379194	DMRT3		ENSG00000260001	406.983	0.977877	0.119475	8.18477	2.73e-16	1.93e-15	TGFBR3L
ENSG00000084710	61.7749	-2.14945	0.230895	-9.30921	1.29e-20	1.12e-19	EFR3B		ENSG00000259848	229.44	0.97815	0.154071	6.34868	2.17e-10	1.09e-09	AC097374.1
ENSG00000021645	100.175	-2.14882	0.192551	-11.1597	6.42e-29	8.03e-28	NRXN3		ENSG00000226321	280.393	0.978632	0.128827	7.59651	3.04e-14	1.94e-13	CROCC2
ENSG00000213889	59.5097	-2.14853	0.245566	-8.74931	2.15e-18	1.69e-17	PPM1N		ENSG00000272812	23.363	0.978774	0.361307	2.70898	0.00674896	0.0161659	AC004908.2
ENSG00000119514	151.483	-2.14817	0.173995	-12.3461	5.11e-35	7.87e-34	GALNT12		ENSG00000258128	157.95	0.979038	0.165557	5.91359	3.35e-09	1.54e-08	MKRN9P
ENSG00000057704	147.662	-2.14813	0.195626	-10.9808	4.73e-28	5.71e-27	TMCC3		ENSG00000188163	19.479	0.979116	0.402622	2.43185	0.0150219	0.0336388	FAM166A
ENSG00000198342	17.7149	-2.14682	0.464643	-4.62036	3.83e-06	1.37e-05	ZNF442		ENSG00000148346	186.122	0.979173	0.155957	6.27849	3.42e-10	1.69e-09	LCN2
ENSG00000138823	12.8937	-2.14602	0.555874	-3.86063	0.000113095	0.000346418	MTTP		ENSG00000130958	503.336	0.980054	0.0913079	10.7335	7.09e-27	8.2e-26	SLC35D2
ENSG00000265480	7.25956	-2.14581	0.693856	-3.09259	0.00198418	0.00515958	KRT18P55		ENSG00000222012	50.9972	0.9806	0.248528	3.94564	7.96e-05	0.000248267	AC005481.1
ENSG00000180440	4.72659	-2.14539	0.815627	-2.63035	0.00852958	0.0200559	SERTM1		ENSG00000204385	3485.25	0.98127	0.0548373	17.8942	1.31e-71	5.28e-70	SLC44A4
ENSG00000187135	6.51623	-2.14406	0.773712	-2.77114	0.00558604	0.0135863	VSTM2B		ENSG00000270276	55.6215	0.981868	0.271942	3.61058	0.000305512	0.000886513	HIST2H4B
ENSG00000188158	60.3821	-2.14356	0.253817	-8.44531	3.03e-17	2.27e-16	NHS		ENSG00000183401	397.633	0.982933	0.0972302	10.1093	5.02e-24	5.13e-23	CCDC159
ENSG00000105855	9.4747	-2.14099	0.691292	-3.09708	0.00195435	0.0050873	ITGB8		ENSG00000279579	26.3988	0.983031	0.343774	2.85953	0.00424271	0.0105277	LINC01666
ENSG00000272416	4.66168	-2.14039	0.907895	-2.35753	0.0183969	0.0402892	AC025175.1		ENSG00000178401	1520.96	0.983083	0.0534476	18.3934	1.48e-75	6.51e-74	DNAJC22
ENSG00000021826	450.903	-2.13981	0.0954534	-22.4173	2.67e-111	2.24e-109	CPS1		ENSG00000105289	1271.4	0.983288	0.0700801	14.0309	1.01e-44	2.07e-43	TJP3
ENSG00000187122	69.6532	-2.13967	0.246865	-8.66736	4.42e-18	3.43e-17	SLIT1		ENSG00000236753	365.022	0.983506	0.114401	8.59703	8.18e-18	6.28e-17	MKLN1-AS
ENSG00000144199	265.722	-2.13964	0.137157	-15.6	7.28e-55	1.99e-53	FAHD2B		ENSG00000228265	72.9663	0.98357	0.202518	4.85671	1.19e-06	4.47e-06	#N/A
ENSG00000123576	7.5539	-2.139	0.638087	-3.35221	0.000801678	0.00220301	ESX1		ENSG00000101188	70.1775	0.983756	0.263988	3.72652	0.000194141	0.00057645	NTSR1
ENSG00000273654	40.7191	-2.13835	0.352154	-6.07219	1.26e-09	5.97e-09	AC020904.2		ENSG00000231663	90.4689	0.983847	0.204677	4.80682	1.53e-06	5.67e-06	COA6-AS1
ENSG00000129244	16.181	-2.1372	0.427694	-4.99703	5.82e-07	2.24e-06	ATP1B2		ENSG00000210100	29.5345	0.984763	0.357962	2.75103	0.0059408	0.0143741	MT-TI
ENSG00000171827	67.3482	-2.13692	0.228684	-9.34444	9.24e-21	8.09e-20	ZNF570		ENSG00000198785	41.7809	0.984883	0.307899	3.19872	0.00138039	0.00367893	GRIN3A
ENSG00000231107	23.2177	-2.13684	0.399222	-5.35252	8.67e-08	3.58e-07	LINC01508		ENSG00000255153	265.649	0.984976	0.121147	8.13045	4.28e-16	3e-15	TOLLIP-AS1
ENSG00000135439	31.6756	-2.13639	0.34143	-6.2572	3.92e-10	1.92e-09	AGAP2		ENSG00000176912	119.264	0.98538	0.16399	6.00876	1.87e-09	8.72e-09	TYMSOS
ENSG00000177599	3.18964	-2.13346	0.94038	-2.26872	0.0232851	0.0498544	ZNF491		ENSG00000130762	1811.57	0.986319	0.0622345	15.8484	1.44e-56	4.1e-55	ARHGEF16
ENSG00000134871	806.477	-2.13319	0.086327	-24.7105	8.24e-135	1e-132	COL4A2		ENSG00000143416	7285.63	0.986926	0.0430199	22.9412	1.81e-116	1.69e-114	SELENBP1
ENSG00000248774	7.4468	-2.13263	0.667425	-3.19531	0.00139683	0.00372096	AC097534.1		ENSG00000078795	30.6961	0.986936	0.305349	3.23216	0.00122859	0.00329674	PKD2L2
ENSG00000117016	819.258	-2.13045	0.0714273	-29.8268	1.76e-195	4.98e-193	RIMS3		ENSG00000127578	54.2915	0.987238	0.230461	4.28375	1.84e-05	6.13e-05	WFIKKN1
ENSG00000227354	222.02	-2.12498	0.146345	-14.5204	9e-48	2.03e-46	RBM26-AS1		ENSG00000183615	44.8956	0.98728	0.273792	3.60595	0.000311017	0.000901061	FAM167B
ENSG00000103034	117.114	-2.12455	0.186066	-11.4183	3.39e-30	4.45e-29	NDRG4		ENSG00000203985	57.4528	0.987325	0.234197	4.21579	2.49e-05	8.19e-05	LDLRAD1
ENSG00000276292	5.83599	-2.12447	0.826219	-2.57132	0.0101313	0.0234681	AC131159.1		ENSG00000129354	3611.19	0.987374	0.0611486	16.1471	1.19e-58	3.51e-57	AP1M2
ENSG00000282057	7.30966	-2.12319	0.717425	-2.95946	0.00308178	0.00779047	AC092807.3		ENSG00000183117	547.663	0.987919	0.0961594	10.2738	9.25e-25	9.74e-24	CSMD1
ENSG00000255201	5.29617	-2.12229	0.743838	-2.85316	0.00432874	0.0107286	AC087623.1		ENSG00000226057	355.148	0.987951	0.0980249	10.0786	6.87e-24	6.99e-23	PHF2P2
ENSG00000122733	7.06154	-2.12228	0.670838	-3.16363	0.00155817	0.00411802	PHF24		ENSG00000068976	17.0759	0.988112	0.386647	2.55559	0.0106008	0.0244792	PYGM
ENSG00000125845	7.52767	-2.12055	0.655002	-3.23747	0.00120596	0.00323886	BMP2		ENSG00000249138	14.2064	0.988198	0.416562	2.37227	0.0176792	0.0389001	SLED1
ENSG00000126467	9.16119	-2.1172	0.625002	-3.38751	0.000705292	0.001952	TSKS		ENSG00000235023	21.0946	0.988491	0.366985	2.69354	0.00706972	0.0168812	AP001626.1
ENSG00000166407	6.71384	-2.11672	0.692305	-3.0575	0.00223191	0.00575533	LMO1		ENSG00000073350	3408.85	0.988945	0.0451473	21.9049	2.33e-106	1.83e-104	LLGL2
ENSG00000100490	38.883	-2.11554	0.297455	-7.11216	1.14e-12	6.64e-12	CDKL1		ENSG00000230650	17.5174	0.990026	0.43517	2.27503	0.022904	0.0491073	AC140479.2
ENSG00000132821	24.07	-2.11449	0.340266	-6.21421	5.16e-10	2.51e-09	VSTM2L		ENSG00000135127	324.407	0.990341	0.145353	6.81336	9.53e-12	5.25e-11	BICDL1
ENSG00000183150	10.07	-2.11299	0.595178	-3.55018	0.000384968	0.00110322	GPR19		ENSG00000278384	191.501	0.990371	0.152942	6.47546	9.45e-11	4.86e-10	AL354822.1
ENSG00000125378	33.6083	-2.11291	0.348245	-6.06732	1.3e-09	6.14e-09	BMP4		ENSG00000246731	72.3687	0.990776	0.208363	4.75504	1.98e-06	7.26e-06	AC100786.1
ENSG00000170190	10.7486	-2.11243	0.604825	-3.49263	0.000478297	0.00135304	SLC16A5		ENSG00000233325	69.6232	0.990781	0.216957	4.56671	4.95e-06	1.75e-05	MIPEPP3
ENSG00000070182	77.3254	-2.1124	0.239277	-8.82828	1.06e-18	8.51e-18	SPTB		ENSG00000115252	20.6474	0.990978	0.423591	2.33947	0.0193112	0.0420747	PDE1A
ENSG00000128203	56.906	-2.11089	0.230974	-9.13909	6.3e-20	5.31e-19	ASPHD2		ENSG00000223478	371.492	0.991727	0.115125	8.61435	7.03e-18	5.41e-17	AL441992.1
ENSG00000274276	304.615	-2.11083	0.130858	-16.1307	1.55e-58	4.57e-57	CBSL		ENSG00000271303	441.165	0.991749	0.158657	6.25089	4.08e-10	2e-09	SRXN1
ENSG00000145287	11.9032	-2.1094	0.599984	-3.51576	0.000438499	0.00124765	PLAC8		ENSG00000163121	22.2383	0.992049	0.351849	2.81953	0.00480935	0.0118344	NEURL3
ENSG00000107796	31.2332	-2.10758	0.310173	-6.79487	1.08e-11	5.94e-11	ACTA2		ENSG00000166391	185.903	0.99233	0.346554	2.86342	0.00419092	0.0104058	MOGAT2
ENSG00000232907	9.48655	-2.10679	0.585315	-3.59941	0.000318935	0.000923417	DLGAP4-AS1		ENSG00000182580	402.378	0.99244	0.102197	9.71103	2.71e-22	2.55e-21	EPHB3
ENSG00000091513	5.55474	-2.10537	0.724079	-2.90765	0.00364159	0.00912172	TF		ENSG00000189419	29.3861	0.992471	0.308661	3.21541	0.00130258	0.00348169	SPATA41
ENSG00000162849	31.7757	-2.10494	0.375539	-5.60511	2.08e-08	9.01e-08	KIF26B		ENSG00000177106	4210.33	0.992515	0.0496811	19.9777	8.6e-89	4.95e-87	EPS8L2
ENSG00000111254	67.7719	-2.10446	0.234155	-8.98748	2.53e-19	2.08e-18	AKAP3		ENSG00000275454	33.0427	0.992642	0.316226	3.13902	0.00169511	0.00445127	AC105020.6
ENSG00000076716	440.327	-2.10427	0.100865	-20.8622	1.18e-96	7.82e-95	GPC4		ENSG00000260000	76.2518	0.992847	0.194892	5.09435	3.5e-07	1.38e-06	AL133338.1
ENSG00000159387	32.6228	-2.1029	0.308494	-6.81667	9.32e-12	5.13e-11	IRX6		ENSG00000143387	95.3988	0.992908	0.167109	5.94167	2.82e-09	1.3e-08	CTSK
ENSG00000165025	181.968	-2.10224	0.139103	-15.1128	1.33e-51	3.38e-50	SYK		ENSG00000258101	48.6105	0.993925	0.268881	3.69653	0.00021857	0.000644851	AC010173.1
ENSG00000258768	13.3401	-2.10185	0.537117	-3.91321	9.11e-05	0.000282245	AL356019.2		ENSG00000141527	293.031	0.994167	0.114109	8.71247	2.97e-18	2.32e-17	CARD14
ENSG00000132386	314.517	-2.10169	0.124974	-16.8171	1.83e-63	6.1e-62	SERPINF1		ENSG00000184144	52.4554	0.994215	0.232375	4.2785	1.88e-05	6.27e-05	CNTN2
ENSG00000081059	90.218	-2.10156	0.189252	-11.1046	1.19e-28	1.47e-27	TCF7		ENSG00000134463	890.662	0.994261	0.0775282	12.8245	1.2e-37	2e-36	ECHDC3
ENSG00000177098	55.0299	-2.0991	0.241815	-8.68059	3.94e-18	3.06e-17	SCN4B		ENSG00000170011	675.516	0.99455	0.0810537	12.2703	1.31e-34	1.98e-33	MYRIP
ENSG00000177519	8.79116	-2.0988	0.644427	-3.25685	0.00112655	0.00303747	RPRM		ENSG00000119922	38.2966	0.994743	0.303477	3.27783	0.0010461	0.00283166	IFIT2
ENSG00000268001	17.4179	-2.09782	0.555249	-3.77816	0.000157991	0.000474475	CARD8-AS1		ENSG00000114656	679.732	0.995961	0.0817063	12.1895	3.53e-34	5.29e-33	KIAA1257
ENSG00000113657	506.976	-2.0978	0.0930863	-22.5361	1.84e-112	1.57e-110	DPYSL3		ENSG00000149243	1586.25	0.996801	0.051728	19.27	9.59e-83	4.92e-81	KLHL35
ENSG00000146221	12.9329	-2.09772	0.476672	-4.40076	1.08e-05	3.68e-05	TCTE1		ENSG00000171451	187.748	0.997191	0.155182	6.42593	1.31e-10	6.66e-10	DSEL
ENSG00000106123	28.3133	-2.09739	0.399309	-5.25254	1.5e-07	6.08e-07	EPHB6		ENSG00000275552	21.2559	0.998079	0.380635	2.62214	0.00873785	0.0204977	AC243965.2
ENSG00000126803	20.8564	-2.09713	0.41043	-5.10959	3.23e-07	1.28e-06	HSPA2		ENSG00000282988	91.765	0.998587	0.192524	5.18682	2.14e-07	8.57e-07	AL031777.3
ENSG00000091844	113.639	-2.09405	0.15451	-13.5529	7.62e-42	1.45e-40	RGS17		ENSG00000268869	30.3585	0.998988	0.338029	2.95533	0.00312332	0.00789255	ESPNP
ENSG00000235033	4.33928	-2.09366	0.868306	-2.4112	0.0159001	0.0353792	AL590999.1		ENSG00000234949	334.62	0.999491	0.120158	8.31813	8.94e-17	6.51e-16	AC104667.2
ENSG00000157502	27.6558	-2.0924	0.33843	-6.18266	6.3e-10	3.04e-09	PWWP3B		ENSG00000255435	27.6304	0.99993	0.339537	2.94498	0.00322974	0.00814023	AP001267.3
ENSG00000171004	619.613	-2.08835	0.0831737	-25.1084	4.03e-139	5.2e-137	HS6ST2		ENSG00000229512	28.1834	1.00004	0.348789	2.86718	0.00414153	0.0102943	AC068580.1
ENSG00000141682	1506.33	-2.08803	0.0827651	-25.2284	1.95e-140	2.62e-138	PMAIP1		ENSG00000129514	10206	1.00013	0.0509	19.649	5.89e-86	3.2e-84	FOXA1
ENSG00000134668	36.6686	-2.08706	0.301222	-6.92865	4.25e-12	2.39e-11	SPOCD1		ENSG00000164128	18.7415	1.00029	0.414797	2.41151	0.0158867	0.0353552	NPY1R
ENSG00000081985	38.6677	-2.08526	0.267989	-7.78113	7.19e-15	4.73e-14	IL12RB2		ENSG00000145781	949.899	1.00059	0.0677952	14.759	2.69e-49	6.36e-48	COMMD10
ENSG00000105784	92.8436	-2.08388	0.183045	-11.3845	5e-30	6.5e-29	RUNDC3B		ENSG00000112414	13714	1.00062	0.0394765	25.3472	9.65e-142	1.34e-139	ADGRG6
ENSG00000097046	1595.61	-2.08178	0.0587968	-35.4063	1.37e-274	1.04e-271	CDC7		ENSG00000102174	62.4902	1.00072	0.266014	3.76189	0.000168632	0.000504997	PHEX
ENSG00000120093	249.569	-2.07807	0.123936	-16.7673	4.24e-63	1.4e-61	HOXB3		ENSG00000138798	528.031	1.0012	0.095739	10.4576	1.35e-25	1.47e-24	EGF
ENSG00000170162	5.69944	-2.07655	0.703245	-2.95281	0.00314896	0.00795223	VGLL2		ENSG00000160712	2599.05	1.00155	0.0524713	19.0876	3.2e-81	1.59e-79	IL6R
ENSG00000057019	208.092	-2.07009	0.127842	-16.1925	5.69e-59	1.69e-57	DCBLD2		ENSG00000229666	40.8945	1.00171	0.289897	3.45541	0.000549462	0.0015401	MAST4-AS1
ENSG00000178636	4.30115	-2.06758	0.862723	-2.39657	0.0165492	0.0366721	AC092656.1		ENSG00000204839	345.087	1.00207	0.118788	8.43582	3.29e-17	2.45e-16	MROH6
ENSG00000196739	243.995	-2.06753	0.122434	-16.8869	5.62e-64	1.9e-62	COL27A1		ENSG00000133321	58.0158	1.00238	0.249551	4.01674	5.9e-05	0.000186715	PLAAT4
ENSG00000260583	5.56028	-2.06507	0.784586	-2.63205	0.00848719	0.0199625	AP000223.1		ENSG00000145113	183.798	1.00251	0.135403	7.40389	1.32e-13	8.12e-13	MUC4
ENSG00000152402	30.6639	-2.06224	0.386767	-5.332	9.71e-08	3.99e-07	GUCY1A2		ENSG00000107611	26.9288	1.004	0.34015	2.95162	0.0031611	0.0079807	CUBN
ENSG00000179532	327.066	-2.06067	0.146783	-14.0389	9.01e-45	1.85e-43	DNHD1		ENSG00000149418	4307.98	1.00432	0.0528334	19.0092	1.43e-80	6.95e-79	ST14
ENSG00000188613	22.9815	-2.05912	0.378979	-5.43334	5.53e-08	2.32e-07	NANOS1		ENSG00000242779	129.713	1.00436	0.173452	5.79046	7.02e-09	3.15e-08	ZNF702P
ENSG00000173320	185.703	-2.05894	0.162456	-12.6738	8.26e-37	1.34e-35	STOX2		ENSG00000188511	44.2884	1.00494	0.268472	3.74317	0.000181713	0.000541631	C22orf34
ENSG00000213612	11.8297	-2.0576	0.520521	-3.95296	7.72e-05	0.000241002	FAM220CP		ENSG00000243056	233.101	1.00556	0.134716	7.46426	8.38e-14	5.21e-13	EIF4EBP3
ENSG00000109674	360.738	-2.05534	0.109812	-18.717	3.6e-78	1.67e-76	NEIL3		ENSG00000255240	32.1077	1.00574	0.321104	3.13212	0.0017355	0.00454863	AP001636.3
ENSG00000135929	7.18777	-2.0544	0.649123	-3.16488	0.00155145	0.00410222	CYP27A1		ENSG00000172425	40.9893	1.00773	0.249219	4.04356	5.26e-05	0.000167606	TTC36
ENSG00000131018	153.885	-2.05439	0.160685	-12.7853	1.98e-37	3.29e-36	SYNE1		ENSG00000154654	1202.57	1.00823	0.0546125	18.4615	4.22e-76	1.88e-74	NCAM2
ENSG00000177606	3407.14	-2.05324	0.0666759	-30.7943	3.13e-208	9.88e-206	JUN		ENSG00000167880	1310.93	1.00834	0.0659329	15.2935	8.45e-53	2.21e-51	EVPL
ENSG00000173705	177.68	-2.05154	0.141966	-14.4509	2.47e-47	5.52e-46	SUSD5		ENSG00000231920	39.0729	1.00852	0.338414	2.98014	0.00288113	0.00731619	NEBL-AS1
ENSG00000152784	7.27591	-2.05049	0.650514	-3.15211	0.00162093	0.00426993	PRDM8		ENSG00000142632	547.396	1.00874	0.0778969	12.9496	2.36e-38	4.04e-37	ARHGEF19
ENSG00000106006	228.768	-2.04948	0.134522	-15.2352	2.06e-52	5.35e-51	HOXA6		ENSG00000117595	1772.19	1.00885	0.0569197	17.724	2.74e-70	1.07e-68	IRF6
ENSG00000115896	15.9585	-2.04892	0.422167	-4.85333	1.21e-06	4.54e-06	PLCL1		ENSG00000175482	283.465	1.00891	0.120113	8.39962	4.48e-17	3.31e-16	POLD4
ENSG00000164742	690.805	-2.04824	0.0862788	-23.7398	1.4e-124	1.49e-122	ADCY1		ENSG00000135842	6510.14	1.00913	0.0470656	21.4409	5.55e-102	4.08e-100	NIBAN1
ENSG00000197935	4.16781	-2.04778	0.817906	-2.50369	0.0122905	0.0280421	ZNF311		ENSG00000111666	11541.5	1.00931	0.0382827	26.3647	3.48e-153	5.73e-151	CHPT1
ENSG00000171791	134.006	-2.0475	0.151839	-13.4847	1.92e-41	3.63e-40	BCL2		ENSG00000221949	36.4916	1.00934	0.29315	3.4431	0.000575091	0.00160996	LINC01465
ENSG00000168824	58.154	-2.04636	0.255753	-8.0013	1.23e-15	8.44e-15	NSG1		ENSG00000162078	1496.55	1.0095	0.07127	14.1644	1.52e-45	3.2e-44	ZG16B
ENSG00000173517	279.664	-2.04473	0.132279	-15.4577	6.7e-54	1.79e-52	PEAK1		ENSG00000140987	27.413	1.00961	0.334734	3.01617	0.0025599	0.00654887	ZSCAN32
ENSG00000087258	125.178	-2.04431	0.184111	-11.1037	1.2e-28	1.49e-27	GNAO1		ENSG00000260337	30.3272	1.00993	0.324609	3.11123	0.0018631	0.00486175	AC091544.4
ENSG00000183873	70.881	-2.04403	0.239867	-8.52152	1.57e-17	1.19e-16	SCN5A		ENSG00000164938	1954.19	1.01098	0.0403126	25.0785	8.54e-139	1.09e-136	TP53INP1
ENSG00000260400	17.8037	-2.04363	0.43405	-4.70828	2.5e-06	9.07e-06	AL513534.2		ENSG00000010704	197.137	1.0111	0.151726	6.66402	2.66e-11	1.42e-10	HFE
ENSG00000162409	929.773	-2.04125	0.0642687	-31.7611	2.23e-221	8.51e-219	PRKAA2		ENSG00000205634	88.7637	1.01131	0.203771	4.96299	6.94e-07	2.65e-06	LINC00898
ENSG00000178386	10.3774	-2.03972	0.569411	-3.58216	0.000340761	0.000983812	ZNF223		ENSG00000181885	12910.2	1.01155	0.0334155	30.2718	2.7e-201	7.97e-199	CLDN7
ENSG00000116771	15.9881	-2.03848	0.453861	-4.49142	7.07e-06	2.46e-05	AGMAT		ENSG00000178187	27.5999	1.01195	0.324819	3.11542	0.00183682	0.00479636	ZNF454
ENSG00000158528	90.38	-2.03626	0.184256	-11.0513	2.16e-28	2.64e-27	PPP1R9A		ENSG00000205885	19.1102	1.01209	0.367145	2.75664	0.00583979	0.0141446	C1RL-AS1
ENSG00000162620	60.8866	-2.03233	0.244516	-8.31164	9.44e-17	6.85e-16	LRRIQ3		ENSG00000249626	116.638	1.01229	0.152371	6.64354	3.06e-11	1.63e-10	AC024560.2
ENSG00000221953	7.26587	-2.032	0.671536	-3.0259	0.00247895	0.00635361	C1orf229		ENSG00000162777	350.321	1.01252	0.0986239	10.2664	9.98e-25	1.05e-23	DENND2D
ENSG00000251271	14.8329	-2.03098	0.479202	-4.23825	2.25e-05	7.45e-05	ALG1L7P		ENSG00000265579	99.155	1.01265	0.185217	5.46736	4.57e-08	1.93e-07	AC023301.1
ENSG00000108379	88.7059	-2.0307	0.187491	-10.8309	2.46e-27	2.89e-26	WNT3		ENSG00000142765	1710.54	1.01276	0.0594059	17.0481	3.61e-65	1.27e-63	SYTL1
ENSG00000176697	11.3542	-2.03034	0.480259	-4.22759	2.36e-05	7.79e-05	BDNF		ENSG00000100181	30.1213	1.01312	0.369552	2.74149	0.00611612	0.0147606	TPTEP1
ENSG00000243444	18.5094	-2.02805	0.408549	-4.96403	6.9e-07	2.64e-06	#N/A		ENSG00000106367	13286.8	1.01329	0.0554664	18.2685	1.47e-74	6.35e-73	AP1S1
ENSG00000240990	66.5716	-2.02801	0.213087	-9.51727	1.78e-21	1.61e-20	HOXA11-AS		ENSG00000240972	37.8923	1.01416	0.291186	3.48284	0.000496128	0.00140118	MIF
ENSG00000131409	65.6297	-2.02687	0.220983	-9.17207	4.64e-20	3.93e-19	LRRC4B		ENSG00000164647	3890.79	1.01447	0.0536387	18.9131	8.89e-80	4.29e-78	STEAP1
ENSG00000228060	8.21901	-2.02376	0.612534	-3.3039	0.000953482	0.00259552	PABPC4-AS1		ENSG00000234432	332.064	1.0161	0.105306	9.64897	4.97e-22	4.63e-21	AC092171.3
ENSG00000197467	51.8236	-2.02155	0.260448	-7.76185	8.37e-15	5.49e-14	COL13A1		ENSG00000249116	140.632	1.01641	0.165149	6.15448	7.53e-10	3.62e-09	AC025183.1
ENSG00000232732	5.61118	-2.02107	0.757776	-2.66711	0.00765071	0.0181628	AC097717.1		ENSG00000111052	3576.6	1.01666	0.0543509	18.7054	4.47e-78	2.06e-76	LIN7A
ENSG00000159147	665.05	-2.02078	0.0682559	-29.606	1.25e-192	3.37e-190	DONSON		ENSG00000258334	34.9632	1.0168	0.268427	3.78799	0.000151874	0.000457201	AC125611.4
ENSG00000105996	11.6018	-2.02013	0.51588	-3.91588	9.01e-05	0.000279326	HOXA2		ENSG00000273783	82.0291	1.01707	0.188065	5.40807	6.37e-08	2.66e-07	AL136040.1
ENSG00000135334	782.637	-2.01823	0.0786796	-25.6512	4.1e-145	6.06e-143	AKIRIN2		ENSG00000233077	22.1881	1.01712	0.377958	2.69111	0.00712154	0.0169917	LINC01271
ENSG00000170345	21.1271	-2.01786	0.40952	-4.92738	8.33e-07	3.16e-06	FOS		ENSG00000204054	6196.2	1.01734	0.0363264	28.0056	1.39e-172	2.9e-170	LINC00963
ENSG00000023902	163.661	-2.01703	0.133622	-15.095	1.75e-51	4.39e-50	PLEKHO1		ENSG00000104413	2879.98	1.01765	0.0449256	22.652	1.33e-113	1.18e-111	ESRP1
ENSG00000249992	56.8846	-2.01569	0.237555	-8.48513	2.15e-17	1.62e-16	TMEM158		ENSG00000171766	53.9552	1.01851	0.258139	3.94558	7.96e-05	0.000248292	GATM
ENSG00000107518	52.1425	-2.01322	0.273601	-7.35822	1.86e-13	1.13e-12	ATRNL1		ENSG00000246705	505.635	1.01865	0.093883	10.8502	1.99e-27	2.35e-26	H2AFJ
ENSG00000151718	379.848	-2.0084	0.130721	-15.364	2.85e-53	7.53e-52	WWC2		ENSG00000268916	663.749	1.01942	0.0958341	10.6373	2e-26	2.27e-25	CSAG3
ENSG00000090376	6.40326	-2.00658	0.679124	-2.95466	0.00313011	0.00790753	IRAK3		ENSG00000163354	212.779	1.01962	0.112969	9.02564	1.79e-19	1.48e-18	DCST2
ENSG00000197863	51.2971	-2.00651	0.289063	-6.94144	3.88e-12	2.19e-11	ZNF790		ENSG00000168032	53.9155	1.01988	0.214962	4.74445	2.09e-06	7.63e-06	ENTPD3
ENSG00000127366	20.0823	-2.00473	0.398033	-5.0366	4.74e-07	1.84e-06	TAS2R5		ENSG00000180425	723.165	1.01993	0.0786437	12.969	1.83e-38	3.15e-37	C11orf71
ENSG00000120278	139.723	-2.00153	0.170972	-11.7068	1.18e-31	1.62e-30	PLEKHG1		ENSG00000275765	194.056	1.01997	0.152922	6.66987	2.56e-11	1.37e-10	AC091982.3
ENSG00000151572	23.2491	-2.00053	0.380693	-5.25498	1.48e-07	6.01e-07	ANO4		ENSG00000187172	222.055	1.01999	0.131403	7.76228	8.34e-15	5.48e-14	BAGE2
ENSG00000232284	14.3989	-2.00026	0.442712	-4.5182	6.24e-06	2.18e-05	GNG12-AS1		ENSG00000274383	16.7816	1.01999	0.412798	2.47091	0.0134769	0.0304732	AC103691.1
ENSG00000164900	16.2412	-1.99952	0.449303	-4.45026	8.58e-06	2.95e-05	GBX1		ENSG00000264808	16.644	1.02055	0.43483	2.347	0.0189253	0.0413178	AC068025.1
ENSG00000264125	13.9287	-1.9993	0.477646	-4.18575	2.84e-05	9.3e-05	AC104984.1		ENSG00000152910	291.616	1.02115	0.100094	10.2019	1.94e-24	2.02e-23	CNTNAP4
ENSG00000189184	21.0422	-1.99897	0.365226	-5.47324	4.42e-08	1.87e-07	PCDH18		ENSG00000204959	898.255	1.02145	0.0746139	13.6898	1.17e-42	2.26e-41	ARHGEF34P
ENSG00000093009	920.801	-1.99719	0.117937	-16.9344	2.51e-64	8.61e-63	CDC45		ENSG00000196787	519.058	1.02197	0.0962912	10.6133	2.58e-26	2.92e-25	HIST1H2AG
ENSG00000163873	6.79889	-1.99668	0.645937	-3.09114	0.00199388	0.00518334	GRIK3		ENSG00000204979	14.4323	1.02199	0.448851	2.2769	0.022792	0.0488863	MS4A13
ENSG00000135919	106.215	-1.99531	0.169269	-11.7878	4.51e-32	6.32e-31	SERPINE2		ENSG00000260708	108.389	1.02236	0.165394	6.18133	6.36e-10	3.07e-09	AL118516.1
ENSG00000152192	412.078	-1.99376	0.0919865	-21.6745	3.57e-104	2.71e-102	POU4F1		ENSG00000260742	57.0406	1.02254	0.22874	4.47033	7.81e-06	2.7e-05	AC009962.1
ENSG00000259705	6.69123	-1.99237	0.653513	-3.04871	0.0022983	0.00591541	AC084757.3		ENSG00000156968	1039.58	1.02256	0.0574005	17.8144	5.46e-71	2.17e-69	MPV17L
ENSG00000105825	5.54853	-1.99199	0.740007	-2.69185	0.00710576	0.016956	TFPI2		ENSG00000272384	15.3476	1.02279	0.416437	2.45604	0.0140476	0.0316526	AC016405.3
ENSG00000148123	12.495	-1.99117	0.764332	-2.6051	0.00918463	0.021456	PLPPR1		ENSG00000124635	330.837	1.02293	0.113794	8.9893	2.49e-19	2.05e-18	HIST1H2BJ
ENSG00000232412	12.0109	-1.99111	0.529478	-3.76051	0.000169564	0.000507566	AL121601.1		ENSG00000266947	171.759	1.02299	0.149338	6.85018	7.38e-12	4.09e-11	AC022916.1
ENSG00000118523	17.2959	-1.9893	0.391699	-5.07865	3.8e-07	1.49e-06	CCN2		ENSG00000279602	76.5997	1.02326	0.191732	5.33692	9.45e-08	3.89e-07	AC109326.1
ENSG00000131153	642.042	-1.98875	0.0983703	-20.217	6.94e-91	4.17e-89	GINS2		ENSG00000196724	97.3298	1.02336	0.173362	5.90303	3.57e-09	1.63e-08	ZNF418
ENSG00000231752	9.47278	-1.98851	0.660708	-3.00967	0.0026153	0.00668189	EMBP1		ENSG00000106538	21.7774	1.02368	0.374081	2.73652	0.00620931	0.0149711	RARRES2
ENSG00000271913	11.355	-1.9883	0.553874	-3.5898	0.000330927	0.000956828	AL035530.2		ENSG00000181007	155.359	1.02398	0.13585	7.53758	4.79e-14	3.01e-13	ZFP82
ENSG00000133106	10.0084	-1.98817	0.650561	-3.05609	0.00224244	0.00578083	EPSTI1		ENSG00000166401	25.9558	1.02403	0.396361	2.58357	0.00977845	0.0227216	SERPINB8
ENSG00000120833	397.802	-1.98804	0.125248	-15.8728	9.78e-57	2.79e-55	SOCS2		ENSG00000122420	2292.33	1.0244	0.0594302	17.237	1.4e-66	5.06e-65	PTGFR
ENSG00000170214	5.80342	-1.98782	0.71115	-2.79521	0.00518655	0.0126899	ADRA1B		ENSG00000196747	53.7489	1.02442	0.240198	4.2649	2e-05	6.64e-05	HIST1H2AI
ENSG00000232022	31.6255	-1.98607	0.302581	-6.56375	5.25e-11	2.75e-10	FAAHP1		ENSG00000171604	1035.72	1.02465	0.0787891	13.0049	1.15e-38	1.98e-37	CXXC5
ENSG00000084110	4.01517	-1.98562	0.838878	-2.367	0.0179331	0.0393864	HAL		ENSG00000169026	342.136	1.02474	0.110017	9.31443	1.23e-20	1.07e-19	SLC49A3
ENSG00000174672	298.549	-1.98311	0.113713	-17.4397	4.12e-68	1.53e-66	BRSK2		ENSG00000179277	47.1169	1.02481	0.276032	3.71266	0.000205096	0.000607116	MEIS3P1
ENSG00000134758	1897.56	-1.98265	0.0556432	-35.6315	4.55e-278	3.68e-275	RNF138		ENSG00000235098	62.4144	1.02532	0.237493	4.31725	1.58e-05	5.31e-05	ANKRD65
ENSG00000279400	8.80182	-1.97786	0.608112	-3.25246	0.00114411	0.00308179	AC008957.3		ENSG00000100290	216.688	1.02557	0.128759	7.96505	1.65e-15	1.12e-14	BIK
ENSG00000184160	204.472	-1.97726	0.129933	-15.2176	2.7e-52	6.98e-51	ADRA2C		ENSG00000275494	98.9796	1.02636	0.181244	5.66285	1.49e-08	6.5e-08	AC133552.5
ENSG00000007968	436.489	-1.97534	0.106617	-18.5274	1.24e-76	5.56e-75	E2F2		ENSG00000229368	44.0381	1.02637	0.302328	3.39489	0.000686562	0.0019038	AC090587.2
ENSG00000205959	8.99299	-1.97512	0.640608	-3.08319	0.00204792	0.00531326	AC105345.1		ENSG00000073464	756.047	1.02713	0.0730435	14.0619	6.51e-45	1.34e-43	CLCN4
ENSG00000170608	8.99699	-1.97511	0.737522	-2.67803	0.00740561	0.0176159	FOXA3		ENSG00000132677	34.6301	1.02754	0.310392	3.31045	0.000931447	0.00253906	RHBG
ENSG00000272163	6.56987	-1.97491	0.756364	-2.61105	0.00902643	0.0211188	AF106564.1		ENSG00000270168	135.34	1.02764	0.223505	4.59783	4.27e-06	1.52e-05	#N/A
ENSG00000267260	13.1976	-1.97452	0.492169	-4.01188	6.02e-05	0.000190404	AC020928.1		ENSG00000135226	1033.18	1.02765	0.169268	6.07118	1.27e-09	6.01e-09	UGT2B28
ENSG00000227603	16.5565	-1.97364	0.433057	-4.55745	5.18e-06	1.83e-05	#N/A		ENSG00000203797	70.2768	1.02806	0.236873	4.34014	1.42e-05	4.8e-05	DDO
ENSG00000196967	177.133	-1.97302	0.137684	-14.3301	1.42e-46	3.09e-45	ZNF585A		ENSG00000175707	630.812	1.02818	0.0881158	11.6685	1.85e-31	2.53e-30	KDF1
ENSG00000183779	3738.45	-1.9724	0.0765101	-25.7795	1.5e-146	2.28e-144	ZNF703		ENSG00000273018	173.823	1.0291	0.127574	8.0667	7.22e-16	5.02e-15	FAM106A
ENSG00000162458	166.417	-1.97226	0.146746	-13.44	3.53e-41	6.61e-40	FBLIM1		ENSG00000085552	349.341	1.02927	0.109311	9.416	4.69e-21	4.17e-20	IGSF9
ENSG00000144935	189.86	-1.96829	0.131549	-14.9624	1.29e-50	3.16e-49	TRPC1		ENSG00000233621	79.4057	1.02936	0.214309	4.80318	1.56e-06	5.77e-06	LINC01137
ENSG00000178752	387.214	-1.96809	0.112234	-17.5355	7.68e-69	2.89e-67	ERFE		ENSG00000272078	78.4693	1.03	0.196058	5.25353	1.49e-07	6.05e-07	AL139423.1
ENSG00000101938	39.4323	-1.96747	0.305119	-6.4482	1.13e-10	5.78e-10	CHRDL1		ENSG00000158716	747.356	1.03004	0.0832883	12.3672	3.94e-35	6.09e-34	DUSP23
ENSG00000085741	32.9259	-1.96745	0.297886	-6.6047	3.98e-11	2.1e-10	WNT11		ENSG00000137648	29.9238	1.03063	0.326583	3.15579	0.00160062	0.00421965	TMPRSS4
ENSG00000243829	7.81481	-1.96705	0.583071	-3.3736	0.000741934	0.00204846	AC011495.1		ENSG00000089225	61.5713	1.03263	0.300379	3.43776	0.000586539	0.00164017	TBX5
ENSG00000083520	1648.87	-1.96535	0.0606633	-32.3976	2.96e-230	1.29e-227	DIS3		ENSG00000188112	983.771	1.03309	0.0693164	14.904	3.1e-50	7.52e-49	C6orf132
ENSG00000164929	7.78057	-1.96512	0.669302	-2.93607	0.00332402	0.00836743	BAALC		ENSG00000197971	1778.5	1.03419	0.059447	17.3968	8.72e-68	3.19e-66	MBP
ENSG00000134940	9.18437	-1.96469	0.543618	-3.6141	0.000301389	0.000875013	ACRV1		ENSG00000282851	176.651	1.03425	0.14445	7.15992	8.07e-13	4.74e-12	BISPR
ENSG00000175264	10.3728	-1.96333	0.580859	-3.38004	0.00072475	0.00200359	CHST1		ENSG00000154710	641.084	1.03426	0.125653	8.23107	1.86e-16	1.33e-15	RABGEF1
ENSG00000136490	131.872	-1.96197	0.162763	-12.0541	1.84e-33	2.7e-32	LIMD2		ENSG00000151690	1506.71	1.0343	0.0606996	17.0396	4.18e-65	1.46e-63	MFSD6
ENSG00000026508	20.6299	-1.96132	0.408539	-4.80081	1.58e-06	5.84e-06	CD44		ENSG00000272913	104.237	1.03493	0.190714	5.4266	5.74e-08	2.41e-07	AC009237.14
ENSG00000016082	55.1641	-1.9597	0.282359	-6.94048	3.91e-12	2.2e-11	ISL1		ENSG00000026036	65.1609	1.0352	0.260971	3.96675	7.29e-05	0.000228212	RTEL1-TNFRSF6B
ENSG00000113140	251.586	-1.95793	0.11643	-16.8164	1.85e-63	6.16e-62	SPARC		ENSG00000249572	85.2292	1.03539	0.190783	5.42705	5.73e-08	2.4e-07	AC034231.1
ENSG00000188801	5.67121	-1.95724	0.754012	-2.59576	0.00943809	0.0219884	ZNF322P1		ENSG00000204386	1394.05	1.03548	0.0785807	13.1773	1.19e-39	2.11e-38	NEU1
ENSG00000159958	62.3446	-1.9572	0.244615	-8.00114	1.23e-15	8.45e-15	TNFRSF13C		ENSG00000184497	116.985	1.03551	0.181142	5.71656	1.09e-08	4.8e-08	TMEM255B
ENSG00000203808	14.315	-1.95523	0.527437	-3.70705	0.000209691	0.000620251	BVES-AS1		ENSG00000207650	32.421	1.03614	0.32013	3.23663	0.00120951	0.00324807	MIR570
ENSG00000136122	255.376	-1.95508	0.118921	-16.4402	9.86e-61	3.06e-59	BORA		ENSG00000262539	38.1915	1.03615	0.281353	3.68275	0.000230735	0.000678701	AC005829.2
ENSG00000128805	219.9	-1.9505	0.153788	-12.683	7.34e-37	1.19e-35	ARHGAP22		ENSG00000246627	15.179	1.03659	0.443698	2.33625	0.0194783	0.0424141	CACNA1C-AS1
ENSG00000229415	4.76612	-1.95039	0.82363	-2.36804	0.0178827	0.039282	SFTA3		ENSG00000268996	525.354	1.03681	0.0775011	13.378	8.13e-41	1.5e-39	MAN1B1-DT
ENSG00000225805	7.69916	-1.95004	0.702627	-2.77535	0.00551421	0.0134258	DEFB131B		ENSG00000204382	58.1381	1.03682	0.308935	3.35613	0.000790419	0.00217534	XAGE1B
ENSG00000136982	577.113	-1.94585	0.0873301	-22.2816	5.58e-110	4.61e-108	DSCC1		ENSG00000162461	56.7167	1.03716	0.297576	3.48536	0.000491471	0.00138874	SLC25A34
ENSG00000149256	63.6366	-1.94441	0.208367	-9.33164	1.04e-20	9.11e-20	TENM4		ENSG00000102007	443.145	1.03792	0.104926	9.89191	4.51e-23	4.44e-22	PLP2
ENSG00000115226	69.3759	-1.94411	0.229668	-8.46488	2.56e-17	1.92e-16	FNDC4		ENSG00000205869	20.0189	1.03798	0.330606	3.13964	0.00169155	0.00444235	KRTAP5-1
ENSG00000115468	220.116	-1.94391	0.128193	-15.1639	6.14e-52	1.57e-50	EFHD1		ENSG00000272686	476.163	1.038	0.0920813	11.2726	1.79e-29	2.28e-28	AC006333.2
ENSG00000166833	69.3718	-1.94246	0.262556	-7.39825	1.38e-13	8.45e-13	NAV2		ENSG00000101076	28.9416	1.03853	0.274476	3.78369	0.000154523	0.000464768	HNF4A
ENSG00000227954	5.83142	-1.93977	0.831178	-2.33376	0.0196082	0.0426767	TARID		ENSG00000089041	52.582	1.03929	0.222482	4.67137	2.99e-06	1.08e-05	P2RX7
ENSG00000025423	89.6237	-1.93924	0.199001	-9.7449	1.94e-22	1.85e-21	HSD17B6		ENSG00000039139	316.376	1.03931	0.102064	10.1829	2.36e-24	2.45e-23	DNAH5
ENSG00000198947	190.826	-1.93908	0.139495	-13.9008	6.27e-44	1.25e-42	DMD		ENSG00000169885	86.0151	1.03964	0.188903	5.50358	3.72e-08	1.58e-07	CALML6
ENSG00000118412	594.276	-1.93838	0.0769868	-25.178	6.97e-140	9.22e-138	CASP8AP2		ENSG00000183960	2952.15	1.03986	0.0657677	15.8111	2.61e-56	7.38e-55	KCNH8
ENSG00000280018	8.13061	-1.93821	0.669621	-2.89449	0.00379776	0.00948699	CU634019.5		ENSG00000073146	181.299	1.03988	0.128577	8.08759	6.09e-16	4.24e-15	MOV10L1
ENSG00000185869	127.216	-1.93788	0.21051	-9.20566	3.4e-20	2.9e-19	ZNF829		ENSG00000261455	753.215	1.03995	0.0906184	11.4762	1.74e-30	2.3e-29	LINC01003
ENSG00000107295	18.795	-1.93744	0.395279	-4.90146	9.51e-07	3.59e-06	SH3GL2		ENSG00000047644	553.744	1.04039	0.0844373	12.3214	6.95e-35	1.06e-33	WWC3
ENSG00000185710	6.53421	-1.93655	0.689696	-2.80783	0.00498763	0.012237	SMG1P4		ENSG00000280287	207.534	1.04092	0.128016	8.13118	4.25e-16	2.98e-15	AC131212.3
ENSG00000269994	42.2929	-1.9363	0.295011	-6.56351	5.26e-11	2.75e-10	AL513318.2		ENSG00000279689	12.773	1.04122	0.456174	2.28251	0.0224592	0.0482457	AC022400.7
ENSG00000158445	13.749	-1.93593	0.468878	-4.12886	3.65e-05	0.000118088	KCNB1		ENSG00000075073	123.782	1.04207	0.16453	6.33358	2.4e-10	1.2e-09	TACR2
ENSG00000102445	20.2343	-1.93457	0.393108	-4.92123	8.6e-07	3.26e-06	RUBCNL		ENSG00000151090	1198.36	1.04231	0.0628196	16.5921	7.95e-62	2.55e-60	THRB
ENSG00000255366	19.3659	-1.9343	0.366649	-5.27562	1.32e-07	5.38e-07	AC120036.4		ENSG00000066185	86.1664	1.0424	0.201241	5.17985	2.22e-07	8.88e-07	ZMYND12
ENSG00000223749	61.496	-1.93308	0.261455	-7.39355	1.43e-13	8.75e-13	MIR503HG		ENSG00000178685	1801.11	1.04269	0.0609248	17.1144	1.16e-65	4.14e-64	PARP10
ENSG00000228981	9.09025	-1.93078	0.776942	-2.4851	0.0129516	0.0294091	AC097658.1		ENSG00000272468	60.898	1.0433	0.20929	4.98494	6.2e-07	2.38e-06	AL021807.1
ENSG00000141744	7.02447	-1.93052	0.686008	-2.81414	0.00489083	0.0120155	PNMT		ENSG00000178567	1130.33	1.04333	0.0659598	15.8176	2.35e-56	6.66e-55	EPM2AIP1
ENSG00000185002	12.0669	-1.92963	0.810545	-2.38065	0.0172819	0.0381023	RFX6		ENSG00000177932	338.491	1.04414	0.0972636	10.7352	6.96e-27	8.05e-26	ZNF354C
ENSG00000204899	1409.36	-1.9294	0.0633496	-30.4565	9.84e-204	2.97e-201	MZT1		ENSG00000235111	65.9946	1.04487	0.241812	4.32101	1.55e-05	5.22e-05	Z97192.3
ENSG00000169635	354.57	-1.9294	0.0985589	-19.5761	2.47e-85	1.32e-83	HIC2		ENSG00000188385	543.142	1.04537	0.0864739	12.0888	1.21e-33	1.78e-32	JAKMIP3
ENSG00000116016	155.53	-1.92918	0.182466	-10.5728	3.98e-26	4.45e-25	EPAS1		ENSG00000127863	1939.11	1.04596	0.0560254	18.6694	8.78e-78	4.04e-76	TNFRSF19
ENSG00000031081	71.0536	-1.92699	0.209592	-9.19398	3.79e-20	3.22e-19	ARHGAP31		ENSG00000268970	42.0307	1.04611	0.286103	3.6564	0.000255786	0.000748946	AC022150.2
ENSG00000135049	1813.42	-1.92694	0.065809	-29.2807	1.82e-188	4.6e-186	AGTPBP1		ENSG00000174567	463.729	1.04666	0.094248	11.1054	1.18e-28	1.46e-27	GOLT1A
ENSG00000186446	149.571	-1.92672	0.154765	-12.4494	1.41e-35	2.21e-34	ZNF501		ENSG00000273456	104.087	1.04669	0.203015	5.15575	2.53e-07	1.01e-06	AC064836.3
ENSG00000120907	13.3995	-1.92606	0.504156	-3.82037	0.000133252	0.000404555	ADRA1A		ENSG00000246582	215.386	1.04674	0.135542	7.7226	1.14e-14	7.41e-14	AC100861.1
ENSG00000131171	333.318	-1.92497	0.113815	-16.9131	3.6e-64	1.23e-62	SH3BGRL		ENSG00000130813	135.67	1.04687	0.168927	6.19717	5.75e-10	2.78e-09	SHFL
ENSG00000001626	5.58508	-1.92332	0.80142	-2.3999	0.0163998	0.0363791	CFTR		ENSG00000145103	187.903	1.047	0.150257	6.96808	3.21e-12	1.82e-11	ILDR1
ENSG00000005073	204.661	-1.92309	0.124846	-15.4036	1.55e-53	4.11e-52	HOXA11		ENSG00000159182	327.748	1.04782	0.113804	9.20725	3.35e-20	2.85e-19	PRAC1
ENSG00000227060	12.4254	-1.92127	0.461896	-4.15953	3.19e-05	0.000103802	LINC00629		ENSG00000081923	1078.68	1.04873	0.0649709	16.1415	1.3e-58	3.84e-57	ATP8B1
ENSG00000136114	13.0429	-1.92083	0.504041	-3.81087	0.000138481	0.000419502	THSD1		ENSG00000271737	76.7943	1.04882	0.234913	4.46471	8.02e-06	2.77e-05	AC008608.2
ENSG00000127362	4.38749	-1.91716	0.780573	-2.4561	0.0140455	0.0316521	TAS2R3		ENSG00000226752	789.484	1.04894	0.071905	14.5879	3.35e-48	7.71e-47	CUTALP
ENSG00000115738	721.347	-1.91571	0.0896583	-21.3668	2.72e-101	1.97e-99	ID2		ENSG00000146938	1590.72	1.04909	0.0546874	19.1833	5.1e-82	2.56e-80	NLGN4X
ENSG00000188573	58.5203	-1.91525	0.290979	-6.58208	4.64e-11	2.43e-10	FBLL1		ENSG00000180596	393.833	1.04915	0.11664	8.9947	2.37e-19	1.95e-18	HIST1H2BC
ENSG00000253508	7.60034	-1.91263	0.680114	-2.81222	0.00492002	0.0120808	AC004080.2		ENSG00000276710	570.483	1.04948	0.0930795	11.2751	1.74e-29	2.22e-28	CSPG4P10
ENSG00000152076	112.662	-1.90682	0.167668	-11.3725	5.73e-30	7.42e-29	CCDC74B		ENSG00000215769	36.1577	1.04982	0.271599	3.86534	0.000110932	0.000340096	ARHGAP27P1-BPTFP1-KPNA2P3
ENSG00000017483	9.09334	-1.90583	0.553289	-3.44455	0.000572007	0.00160149	SLC38A5		ENSG00000278376	180.102	1.04992	0.15061	6.97113	3.14e-12	1.78e-11	AP004609.3
ENSG00000176208	665.438	-1.90464	0.10658	-17.8705	2e-71	8.05e-70	ATAD5		ENSG00000108821	785.797	1.05001	0.0883815	11.8804	1.5e-32	2.12e-31	COL1A1
ENSG00000168748	6.10315	-1.9042	0.756679	-2.51653	0.0118518	0.0271085	CA7		ENSG00000283047	229.126	1.05017	0.138811	7.56542	3.87e-14	2.44e-13	FRG1FP
ENSG00000052850	292.447	-1.90405	0.128463	-14.8218	1.06e-49	2.53e-48	ALX4		ENSG00000151715	24.0213	1.05032	0.437541	2.40051	0.0163722	0.0363209	TMEM45B
ENSG00000253764	8.11718	-1.89803	0.707102	-2.68424	0.00726952	0.0173162	AC019257.1		ENSG00000137767	299.422	1.05062	0.116473	9.02029	1.88e-19	1.55e-18	SQOR
ENSG00000164841	23.2499	-1.89667	0.359598	-5.27443	1.33e-07	5.42e-07	TMEM74		ENSG00000251432	36.4914	1.05063	0.274517	3.82719	0.000129614	0.000394206	LINC02615
ENSG00000223658	5.9254	-1.89639	0.740793	-2.55995	0.0104688	0.0241928	C1GALT1C1L		ENSG00000106070	18413.5	1.05091	0.0535046	19.6414	6.84e-86	3.7e-84	GRB10
ENSG00000184613	83.5635	-1.89402	0.208534	-9.08254	1.06e-19	8.88e-19	NELL2		ENSG00000231711	166.825	1.05147	0.146301	7.18702	6.62e-13	3.91e-12	LINC00899
ENSG00000243083	11.4044	-1.89272	0.545527	-3.46952	0.000521398	0.00146712	LINC00870		ENSG00000125780	92.8628	1.05227	0.19389	5.42717	5.73e-08	2.4e-07	TGM3
ENSG00000140600	105.332	-1.8885	0.175959	-10.7327	7.15e-27	8.27e-26	SH3GL3		ENSG00000178226	66.2801	1.05229	0.252952	4.16005	3.18e-05	0.000103575	PRSS36
ENSG00000184261	4.21048	-1.88759	0.816206	-2.31264	0.0207426	0.0448932	KCNK12		ENSG00000172824	42.6136	1.053	0.282826	3.72312	0.000196778	0.00058375	CES4A
ENSG00000215458	72.2545	-1.88628	0.224495	-8.40232	4.38e-17	3.24e-16	AATBC		ENSG00000207279	16.2961	1.05381	0.462462	2.2787	0.0226849	0.048687	SNORD116-24
ENSG00000187741	829.544	-1.88615	0.0815836	-23.1193	2.96e-118	2.87e-116	FANCA		ENSG00000182179	81.2468	1.054	0.211894	4.9742	6.55e-07	2.51e-06	UBA7
ENSG00000178445	305.197	-1.88516	0.125599	-15.0093	6.38e-51	1.58e-49	GLDC		ENSG00000164050	872.778	1.05446	0.0876019	12.0369	2.27e-33	3.31e-32	PLXNB1
ENSG00000240086	30.4551	-1.88463	0.376465	-5.00614	5.55e-07	2.14e-06	AC092969.1		ENSG00000282826	428.24	1.05518	0.0949558	11.1123	1.09e-28	1.35e-27	FRG1CP
ENSG00000167619	50.0862	-1.88436	0.265805	-7.08926	1.35e-12	7.8e-12	TMEM145		ENSG00000240005	24.866	1.05554	0.326691	3.23102	0.0012335	0.00330961	STIM2-AS1
ENSG00000170681	41.0764	-1.88413	0.281858	-6.68469	2.31e-11	1.24e-10	CAVIN4		ENSG00000249574	71.6036	1.05582	0.19009	5.55432	2.79e-08	1.2e-07	AC226118.1
ENSG00000141750	30.2137	-1.88388	0.324489	-5.8057	6.41e-09	2.88e-08	STAC2		ENSG00000268902	234.065	1.05588	0.115689	9.12684	7.05e-20	5.94e-19	CSAG2
ENSG00000279456	9.30992	-1.88358	0.575888	-3.27074	0.00107265	0.00289839	AL353763.1		ENSG00000269586	411.392	1.0562	0.0898955	11.7492	7.13e-32	9.93e-31	CT45A10
ENSG00000124143	5.01023	-1.88317	0.774383	-2.43184	0.0150225	0.0336388	ARHGAP40		ENSG00000186594	220.527	1.05655	0.133275	7.92764	2.23e-15	1.51e-14	MIR22HG
ENSG00000245573	39.5596	-1.88256	0.28936	-6.50592	7.72e-11	3.99e-10	BDNF-AS		ENSG00000149809	3016.67	1.05674	0.0554413	19.0605	5.38e-81	2.65e-79	TM7SF2
ENSG00000173406	6.24216	-1.88254	0.649632	-2.89786	0.00375721	0.00939252	DAB1		ENSG00000231770	409.49	1.05797	0.0950158	11.1347	8.51e-29	1.06e-27	TMEM44-AS1
ENSG00000103528	36.3775	-1.88014	0.298012	-6.30893	2.81e-10	1.39e-09	SYT17		ENSG00000178038	575.957	1.05907	0.100697	10.5174	7.19e-26	7.96e-25	ALS2CL
ENSG00000146966	77.1016	-1.87923	0.233391	-8.05184	8.16e-16	5.65e-15	DENND2A		ENSG00000235890	175.886	1.05913	0.151313	6.99962	2.57e-12	1.46e-11	TSPEAR-AS1
ENSG00000112309	24.3327	-1.87589	0.398889	-4.70279	2.57e-06	9.3e-06	B3GAT2		ENSG00000203819	100.453	1.05927	0.167513	6.32349	2.56e-10	1.27e-09	#N/A
ENSG00000280385	87.2317	-1.87135	0.186795	-10.0182	1.27e-23	1.28e-22	AP000648.4		ENSG00000222033	22.8618	1.05961	0.363983	2.91115	0.00360106	0.0090235	LINC01124
ENSG00000230439	19.4596	-1.8688	0.462058	-4.04453	5.24e-05	0.000166955	#N/A		ENSG00000126262	76.2472	1.05971	0.192482	5.50549	3.68e-08	1.57e-07	FFAR2
ENSG00000228063	17.015	-1.86464	0.440818	-4.22997	2.34e-05	7.71e-05	LYPLAL1-DT		ENSG00000279852	18.8467	1.05983	0.382759	2.76893	0.00562411	0.0136728	AC083964.2
ENSG00000172167	361.391	-1.86149	0.104423	-17.8264	4.41e-71	1.76e-69	MTBP		ENSG00000248456	33.1063	1.0599	0.266758	3.97327	7.09e-05	0.00022233	LINC02485
ENSG00000062524	14.9793	-1.86015	0.446862	-4.1627	3.15e-05	0.000102465	LTK		ENSG00000224614	141.645	1.06013	0.189144	5.60487	2.08e-08	9.02e-08	TNK2-AS1
ENSG00000258857	4.8512	-1.86015	0.805343	-2.30976	0.0209014	0.0451978	AL359397.1		ENSG00000271918	116.883	1.06057	0.176293	6.01592	1.79e-09	8.36e-09	AC034236.2
ENSG00000122756	51.2501	-1.85955	0.270524	-6.87387	6.25e-12	3.48e-11	CNTFR		ENSG00000119703	257.22	1.06063	0.109127	9.71919	2.5e-22	2.36e-21	ZC2HC1C
ENSG00000144645	54.3263	-1.85776	0.250542	-7.41495	1.22e-13	7.49e-13	OSBPL10		ENSG00000018280	82.0448	1.06103	0.214432	4.94809	7.49e-07	2.86e-06	SLC11A1
ENSG00000235927	10.6208	-1.85651	0.594967	-3.12036	0.00180631	0.00472342	NEXN-AS1		ENSG00000167094	22.0789	1.06142	0.349339	3.03837	0.00237863	0.00610902	TTC16
ENSG00000167393	505.792	-1.85423	0.0844206	-21.9642	6.33e-107	5.03e-105	PPP2R3B		ENSG00000213214	270.824	1.06189	0.131772	8.05857	7.72e-16	5.36e-15	ARHGEF35
ENSG00000113319	48.5747	-1.85196	0.286797	-6.45738	1.07e-10	5.45e-10	RASGRF2		ENSG00000149609	65.4533	1.06229	0.215031	4.94016	7.81e-07	2.97e-06	C20orf144
ENSG00000186462	51.7164	-1.85097	0.236272	-7.83406	4.72e-15	3.14e-14	NAP1L2		ENSG00000251803	21.3876	1.06305	0.38646	2.75073	0.00594625	0.0143852	Y_RNA
ENSG00000163297	69.4011	-1.84931	0.205996	-8.97742	2.77e-19	2.27e-18	ANTXR2		ENSG00000014257	110.861	1.06307	0.176881	6.01005	1.85e-09	8.66e-09	ACPP
ENSG00000155980	153.216	-1.8488	0.138549	-13.344	1.28e-40	2.36e-39	KIF5A		ENSG00000183833	63.696	1.06398	0.230146	4.62309	3.78e-06	1.35e-05	MAATS1
ENSG00000105928	48.6732	-1.84826	0.27312	-6.76722	1.31e-11	7.15e-11	GSDME		ENSG00000197249	26.8874	1.06438	0.314061	3.3891	0.000701235	0.00194097	SERPINA1
ENSG00000272328	12.0868	-1.84808	0.518559	-3.56386	0.000365436	0.00105097	AC007128.2		ENSG00000213759	1986.04	1.06442	0.0999207	10.6526	1.7e-26	1.93e-25	UGT2B11
ENSG00000213904	28.6868	-1.84798	0.341967	-5.40398	6.52e-08	2.72e-07	LIPE-AS1		ENSG00000160180	212.413	1.06455	0.124585	8.54478	1.29e-17	9.8e-17	TFF3
ENSG00000006128	21.2238	-1.84625	0.378496	-4.87786	1.07e-06	4.03e-06	TAC1		ENSG00000105278	139.937	1.06523	0.185784	5.7337	9.83e-09	4.36e-08	ZFR2
ENSG00000183638	6.05003	-1.84469	0.74092	-2.48973	0.012784	0.0290739	RP1L1		ENSG00000174599	124.937	1.06533	0.168445	6.3245	2.54e-10	1.27e-09	TRAM1L1
ENSG00000186732	22.643	-1.84459	0.369551	-4.99144	5.99e-07	2.31e-06	MPPED1		ENSG00000163435	1009.14	1.06535	0.0768364	13.8652	1.03e-43	2.04e-42	ELF3
ENSG00000139044	263.903	-1.84329	0.121771	-15.1373	9.19e-52	2.33e-50	B4GALNT3		ENSG00000050327	1489.78	1.06576	0.0656213	16.2411	2.58e-59	7.75e-58	ARHGEF5
ENSG00000249846	11.0168	-1.84296	0.509141	-3.61973	0.000294907	0.000857025	LINC02021		ENSG00000260572	70.1248	1.06577	0.1846	5.77342	7.77e-09	3.47e-08	AC069224.1
ENSG00000177359	34.2278	-1.84221	0.327039	-5.63299	1.77e-08	7.71e-08	AC024940.2		ENSG00000171121	56.2821	1.06612	0.226967	4.69725	2.64e-06	9.55e-06	KCNMB3
ENSG00000120457	7.8889	-1.84121	0.67975	-2.70866	0.00675549	0.0161787	KCNJ5		ENSG00000225778	19.0684	1.0665	0.367299	2.90363	0.00368864	0.00923031	PROSER2-AS1
ENSG00000227885	6.22502	-1.84023	0.769805	-2.39051	0.0168248	0.0372198	AL590652.1		ENSG00000140961	190.522	1.06745	0.132991	8.02645	1e-15	6.92e-15	OSGIN1
ENSG00000185222	425.093	-1.8399	0.133046	-13.8291	1.7e-43	3.36e-42	TCEAL9		ENSG00000234290	25.5431	1.06756	0.334207	3.19431	0.00140166	0.00373236	AC116366.1
ENSG00000134013	54.3895	-1.83985	0.261996	-7.02244	2.18e-12	1.25e-11	LOXL2		ENSG00000242110	433.235	1.06782	0.104491	10.2193	1.63e-24	1.69e-23	AMACR
ENSG00000198108	8.53544	-1.83877	0.641813	-2.86497	0.00417048	0.0103625	CHSY3		ENSG00000231196	22.6188	1.06816	0.340477	3.13724	0.00170549	0.00447638	#N/A
ENSG00000179935	27.596	-1.83841	0.344589	-5.33508	9.55e-08	3.93e-07	LINC00652		ENSG00000256151	19.4641	1.06847	0.427313	2.50043	0.0124042	0.0282685	ADGRD1-AS1
ENSG00000189366	45.2315	-1.83646	0.29834	-6.15562	7.48e-10	3.59e-09	ALG1L		ENSG00000229178	18.0365	1.06853	0.383171	2.78866	0.00529262	0.0129229	AC233280.1
ENSG00000179083	8.66132	-1.83306	0.745982	-2.45725	0.0140005	0.0315586	FAM133A		ENSG00000123965	91.6597	1.06867	0.19502	5.4798	4.26e-08	1.81e-07	PMS2P5
ENSG00000245680	200.181	-1.83237	0.143134	-12.8018	1.6e-37	2.67e-36	ZNF585B		ENSG00000062038	555.725	1.06891	0.0985794	10.8432	2.15e-27	2.54e-26	CDH3
ENSG00000148357	16.8137	-1.83078	0.442601	-4.13641	3.53e-05	0.000114445	HMCN2		ENSG00000260316	11.2754	1.06968	0.462168	2.31448	0.0206412	0.0446954	AL008727.1
ENSG00000166503	540.046	-1.83005	0.0794742	-23.027	2.5e-117	2.38e-115	HDGFL3		ENSG00000198930	997.438	1.07026	0.0766041	13.9713	2.33e-44	4.72e-43	CSAG1
ENSG00000158321	680.232	-1.82985	0.0810875	-22.5664	9.27e-113	8.04e-111	AUTS2		ENSG00000242407	228.833	1.07033	0.131701	8.12702	4.4e-16	3.08e-15	AC091179.1
ENSG00000229525	10.902	-1.82853	0.532975	-3.43079	0.000601817	0.00168085	AC053503.2		ENSG00000070601	380.127	1.07041	0.0968255	11.055	2.07e-28	2.54e-27	FRMPD1
ENSG00000256663	43.9033	-1.82827	0.30224	-6.04906	1.46e-09	6.85e-09	AC112777.1		ENSG00000272760	122.124	1.07056	0.177107	6.04475	1.5e-09	7.03e-09	AC093726.1
ENSG00000166257	29.8189	-1.82692	0.345763	-5.28372	1.27e-07	5.16e-07	SCN3B		ENSG00000273203	73.8161	1.07084	0.193801	5.52547	3.29e-08	1.4e-07	AC006946.2
ENSG00000006611	51.1223	-1.82621	0.256604	-7.11683	1.1e-12	6.42e-12	USH1C		ENSG00000185522	331.076	1.07085	0.1152	9.29558	1.46e-20	1.27e-19	LMNTD2
ENSG00000184232	655.843	-1.82618	0.080763	-22.6116	3.33e-113	2.93e-111	OAF		ENSG00000022556	710.313	1.07115	0.0774983	13.8216	1.89e-43	3.72e-42	NLRP2
ENSG00000171885	17.5959	-1.82406	0.560571	-3.25393	0.00113818	0.00306703	AQP4		ENSG00000161011	9011.72	1.07136	0.0532797	20.1083	6.24e-90	3.68e-88	SQSTM1
ENSG00000085840	467.973	-1.82245	0.126173	-14.444	2.73e-47	6.09e-46	ORC1		ENSG00000267416	14.9716	1.07164	0.445799	2.40386	0.0162229	0.0360334	AC025048.4
ENSG00000198157	394.074	-1.82073	0.131032	-13.8953	6.77e-44	1.35e-42	HMGN5		ENSG00000260360	13.0016	1.07183	0.462259	2.31868	0.0204124	0.0442693	AL353708.1
ENSG00000181291	41.8018	-1.82071	0.263403	-6.91226	4.77e-12	2.67e-11	TMEM132E		ENSG00000181982	646.616	1.07214	0.0788854	13.5911	4.52e-42	8.64e-41	CCDC149
ENSG00000198756	324.911	-1.82038	0.0998578	-18.2297	3e-74	1.28e-72	COLGALT2		ENSG00000272173	41.5412	1.07216	0.290687	3.68837	0.000225693	0.000664722	U47924.2
ENSG00000245904	8.77893	-1.82031	0.638033	-2.85301	0.00433079	0.0107327	AC025164.1		ENSG00000185974	335.544	1.07229	0.152136	7.04827	1.81e-12	1.04e-11	GRK1
ENSG00000279145	11.3431	-1.81936	0.578566	-3.1446	0.00166311	0.00437434	AC011912.1		ENSG00000114654	810.974	1.07235	0.0707871	15.149	7.7e-52	1.96e-50	EFCC1
ENSG00000272498	8.08116	-1.81768	0.68527	-2.65251	0.00798961	0.0188858	AC090948.2		ENSG00000108798	34.9309	1.0726	0.28107	3.81615	0.000135553	0.00041113	ABI3
ENSG00000250917	15.2788	-1.8159	0.453487	-4.0043	6.22e-05	0.000196254	AL035458.2		ENSG00000139220	462.282	1.07315	0.0902809	11.8867	1.39e-32	1.97e-31	PPFIA2
ENSG00000146411	91.3181	-1.81576	0.253751	-7.15566	8.33e-13	4.88e-12	SLC2A12		ENSG00000261183	214.836	1.074	0.128497	8.35823	6.37e-17	4.67e-16	SPINT1-AS1
ENSG00000198780	331.447	-1.8157	0.108548	-16.7272	8.31e-63	2.71e-61	FAM169A		ENSG00000230102	14.2596	1.07401	0.395004	2.719	0.00654802	0.0157255	LINC02028
ENSG00000100297	1686.32	-1.81484	0.0708008	-25.6331	6.52e-145	9.54e-143	MCM5		ENSG00000271614	58.6305	1.07507	0.236048	4.55447	5.25e-06	1.85e-05	ATP2B1-AS1
ENSG00000184489	358.061	-1.81339	0.111102	-16.3218	6.91e-60	2.11e-58	PTP4A3		ENSG00000162981	49.1554	1.07548	0.251852	4.2703	1.95e-05	6.5e-05	LRATD1
ENSG00000173157	11.1517	-1.81052	0.52482	-3.4498	0.000561003	0.00157116	ADAMTS20		ENSG00000255769	764.567	1.07645	0.0897008	12.0005	3.53e-33	5.12e-32	GOLGA2P10
ENSG00000147003	61.8116	-1.80803	0.238639	-7.57644	3.55e-14	2.25e-13	CLTRN		ENSG00000235049	26.1466	1.07662	0.324462	3.31817	0.000906099	0.00247364	LINC00940
ENSG00000165511	20.2036	-1.8	0.42639	-4.22148	2.43e-05	8e-05	C10orf25		ENSG00000274173	1786.73	1.07673	0.0642022	16.771	3.98e-63	1.32e-61	AL035661.1
ENSG00000171310	118.445	-1.79769	0.179599	-10.0095	1.38e-23	1.39e-22	CHST11		ENSG00000272189	196.066	1.07688	0.162712	6.61834	3.63e-11	1.92e-10	AL024508.2
ENSG00000104112	10.0536	-1.79676	0.536205	-3.35089	0.000805515	0.00221334	SCG3		ENSG00000271079	53.0536	1.07822	0.245635	4.38954	1.14e-05	3.86e-05	CTAGE15
ENSG00000148498	483.912	-1.79451	0.0981906	-18.2758	1.29e-74	5.57e-73	PARD3		ENSG00000225532	26.9528	1.07825	0.326793	3.29947	0.000968661	0.00263401	AL731684.1
ENSG00000100321	361.692	-1.78955	0.0986758	-18.1356	1.67e-73	7e-72	SYNGR1		ENSG00000005379	448.656	1.0784	0.0995501	10.8327	2.41e-27	2.84e-26	TSPOAP1
ENSG00000138658	351.253	-1.78887	0.107915	-16.5766	1.03e-61	3.28e-60	ZGRF1		ENSG00000139351	41.1762	1.07858	0.274564	3.92835	8.55e-05	0.000266079	SYCP3
ENSG00000099822	200.585	-1.78803	0.154928	-11.5411	8.19e-31	1.1e-29	HCN2		ENSG00000255031	42.791	1.07889	0.273214	3.94887	7.85e-05	0.000245073	AP002807.1
ENSG00000257702	24.4745	-1.78766	0.36801	-4.85766	1.19e-06	4.45e-06	LBX2-AS1		ENSG00000130528	36.9873	1.07906	0.308802	3.49435	0.000475226	0.00134491	HRC
ENSG00000215417	108.773	-1.78661	0.210929	-8.47019	2.45e-17	1.84e-16	MIR17HG		ENSG00000136867	18.6141	1.07907	0.452626	2.38402	0.0171247	0.0378041	SLC31A2
ENSG00000158270	148.77	-1.78383	0.152121	-11.7264	9.33e-32	1.29e-30	COLEC12		ENSG00000111679	1239.06	1.07962	0.0548667	19.6772	3.38e-86	1.85e-84	PTPN6
ENSG00000121753	336.529	-1.78364	0.107125	-16.65	3.02e-62	9.78e-61	ADGRB2		ENSG00000159588	55.6849	1.07976	0.221897	4.86605	1.14e-06	4.27e-06	CCDC17
ENSG00000172602	12.4036	-1.78362	0.563941	-3.16279	0.00156267	0.00412794	RND1		ENSG00000167800	29.3734	1.07992	0.380348	2.8393	0.00452122	0.0111744	TBX10
ENSG00000198879	361.662	-1.78235	0.0923732	-19.2951	5.9e-83	3.04e-81	SFMBT2		ENSG00000224078	5324.6	1.08013	0.0563479	19.169	6.72e-82	3.37e-80	SNHG14
ENSG00000182759	47.6521	-1.77708	0.272125	-6.53039	6.56e-11	3.41e-10	MAFA		ENSG00000205323	53.7063	1.0805	0.277162	3.89844	9.68e-05	0.000299053	SARNP
ENSG00000029534	35.3783	-1.77562	0.303204	-5.8562	4.74e-09	2.15e-08	ANK1		ENSG00000221963	340.136	1.0811	0.109071	9.91189	3.7e-23	3.65e-22	APOL6
ENSG00000231952	5.27257	-1.77441	0.743321	-2.38714	0.0169802	0.0375244	DPY19L1P2		ENSG00000185112	1646.29	1.08286	0.0668188	16.2059	4.58e-59	1.37e-57	FAM43A
ENSG00000188738	17.1855	-1.77356	0.409044	-4.33587	1.45e-05	4.89e-05	FSIP2		ENSG00000173662	31.0702	1.08345	0.334172	3.24219	0.00118615	0.00318973	TAS1R1
ENSG00000162946	27.1969	-1.77289	0.345759	-5.12755	2.94e-07	1.16e-06	DISC1		ENSG00000187837	4146.63	1.08398	0.0621219	17.4493	3.48e-68	1.29e-66	HIST1H1C
ENSG00000124140	6.11195	-1.77089	0.679981	-2.60433	0.00920554	0.0214994	SLC12A5		ENSG00000271151	12.6202	1.08409	0.458683	2.36349	0.0181037	0.0397165	AC016737.1
ENSG00000153012	60.6123	-1.767	0.246739	-7.16142	7.98e-13	4.69e-12	LGI2		ENSG00000253642	94.9562	1.08475	0.206793	5.24558	1.56e-07	6.3e-07	AF279873.3
ENSG00000011422	43.2792	-1.7666	0.28171	-6.27101	3.59e-10	1.77e-09	PLAUR		ENSG00000249042	625.042	1.08505	0.0809332	13.4068	5.52e-41	1.03e-39	AC008771.1
ENSG00000196876	76.3259	-1.7642	0.245532	-7.18521	6.71e-13	3.96e-12	SCN8A		ENSG00000205212	11.6809	1.08541	0.472705	2.29616	0.0216668	0.0467134	CCDC144NL
ENSG00000146242	95.32	-1.7632	0.179574	-9.81879	9.35e-23	9.06e-22	TPBG		ENSG00000183230	71.1689	1.08543	0.2076	5.22848	1.71e-07	6.89e-07	CTNNA3
ENSG00000149599	53.2637	-1.76286	0.257874	-6.8361	8.14e-12	4.5e-11	DUSP15		ENSG00000095261	1304.24	1.08551	0.0616377	17.6111	2.02e-69	7.69e-68	PSMD5
ENSG00000267147	5.2612	-1.75948	0.740832	-2.375	0.0175487	0.0386533	LINC01842		ENSG00000255051	29.6776	1.08627	0.375549	2.8925	0.0038219	0.00954555	BCAS2P1
[truncated: 2,252 more rows]
