# Supplementary material for: Clinical and molecular significance of the RNA m6A methyltransferase complex in prostate cancer
Source: Frontiers journal article supplement (doi:10.3389/fgene.2022.1096071), 2023-01-12
Supplement: Data_Sheet_2.zip [file Supplementary_table_8.xlsx]

## Sheet: Sheet1
Supplementary Table 8. Enriched KEGG pathways with DEGs with shMETTL3 (shMETTL3 guide 1 not reported in manuscript) knockdown in LNCaP:C4-2 cells.
A) Significantly (FDR<0.05) enriched KEGG pathways with DEGs with shMETTL3 knockdown.
Enriched KEGG pathways with genes down-regulated with shMETTL3
geneSet	Description	Size	Expect	EnrichmentRatio	pValue	FDR
hsa04931	Insulin resistance	107	14.842	2.2909	1.4124e-06	0.00046469
hsa04910	Insulin signaling pathway	137	19.003	1.9997	1.3313e-05	0.00219
hsa01100	Metabolic pathways	1305	181.01	1.2651	2.1994e-05	0.0022908
hsa05160	Hepatitis C	131	18.171	1.9812	2.7852e-05	0.0022908
hsa01521	EGFR tyrosine kinase inhibitor resistance	79	10.958	2.2815	3.7368e-05	0.0024588
hsa05213	Endometrial cancer	58	8.045	2.486	5.695e-05	0.0031228
hsa04917	Prolactin signaling pathway	70	9.7095	2.2658	0.00012106	0.0055696
hsa04150	mTOR signaling pathway	151	20.945	1.8143	0.00013543	0.0055696
hsa04510	Focal adhesion	199	27.603	1.6665	0.00024684	0.0084186
hsa04146	Peroxisome	83	11.513	2.0847	0.00025588	0.0084186
hsa04750	Inflammatory mediator regulation of TRP channels	99	13.732	1.9662	0.00031191	0.0085515
hsa05231	Choline metabolism in cancer	99	13.732	1.9662	0.00031191	0.0085515
hsa04530	Tight junction	170	23.58	1.6963	0.00041904	0.010605
hsa04142	Lysosome	123	17.061	1.817	0.0005304	0.012464
hsa04144	Endocytosis	244	33.844	1.5364	0.00080957	0.017757
hsa04714	Thermogenesis	229	31.764	1.5426	0.0010332	0.021068
hsa04140	Autophagy	128	17.754	1.746	0.0010886	0.021068
hsa05215	Prostate cancer	97	13.455	1.8581	0.0012618	0.023063
hsa01522	Endocrine resistance	98	13.593	1.8391	0.0014762	0.025562
hsa04933	AGE-RAGE signaling pathway in diabetic complications	99	13.732	1.8206	0.0017213	0.028315
hsa04370	VEGF signaling pathway	59	8.1837	2.0773	0.0020497	0.032113
hsa03050	Proteasome	45	6.2418	2.2429	0.0022637	0.033853
hsa05230	Central carbon metabolism in cancer	65	9.0159	1.9965	0.002498	0.035114
hsa04071	Sphingolipid signaling pathway	118	16.367	1.7107	0.0025631	0.035114
hsa05132	Salmonella infection	86	11.929	1.8443	0.0026682	0.035114
hsa05214	Glioma	71	9.8482	1.9293	0.0029444	0.037258
hsa05164	Influenza A	171	23.719	1.5599	0.0033368	0.04066
hsa05169	Epstein-Barr virus infection	201	27.88	1.5065	0.0036351	0.041166
hsa04932	Non-alcoholic fatty liver disease (NAFLD)	149	20.667	1.5967	0.0036914	0.041166
hsa04914	Progesterone-mediated oocyte maturation	99	13.732	1.7477	0.0037537	0.041166
hsa01524	Platinum drug resistance	73	10.126	1.8764	0.0041231	0.043758
hsa00040	Pentose and glucuronate interconversions	34	4.716	2.3325	0.0046883	0.04688
hsa04611	Platelet activation	123	17.061	1.6412	0.0048023	0.04688
hsa05100	Bacterial invasion of epithelial cells	74	10.264	1.8511	0.0048448	0.04688
Enriched KEGG pathways with genes up-regulated with shMETTL3
hsa04110	Cell cycle	124	29.435	2.2082	3.2672e-12	1.0749e-09
hsa03030	DNA replication	36	8.5457	3.2765	1.0744e-11	1.7673e-09
hsa03040	Spliceosome	134	31.809	1.8863	5.6158e-08	6.1586e-06
hsa03013	RNA transport	171	40.592	1.7491	1.4783e-07	1.2159e-05
hsa05200	Pathways in cancer	526	124.86	1.3695	1.3013e-06	8.541e-05
hsa00230	Purine metabolism	174	41.304	1.6705	1.6909e-06	8.541e-05
hsa03440	Homologous recombination	41	9.7326	2.4659	1.8172e-06	8.541e-05
hsa03420	Nucleotide excision repair	47	11.157	2.3304	2.9601e-06	0.00011007
hsa00240	Pyrimidine metabolism	101	23.975	1.8769	3.011e-06	0.00011007
hsa03430	Mismatch repair	23	5.4598	2.9305	4.1096e-06	0.00013521
hsa03460	Fanconi anemia pathway	54	12.819	2.1843	6.7245e-06	0.00020112
hsa03010	Ribosome	153	36.319	1.6245	2.5614e-05	0.00070225
hsa05166	Human T-cell leukemia virus 1 infection	255	60.532	1.4538	5.0655e-05	0.001282
hsa04390	Hippo signaling pathway	154	36.557	1.5319	0.00025779	0.0060581
hsa04360	Axon guidance	175	41.542	1.4925	0.00028404	0.0062299
hsa00515	Mannose type O-glycan biosynthesis	23	5.4598	2.3811	0.00072117	0.014829
hsa04933	AGE-RAGE signaling pathway in diabetic complications	99	23.501	1.5744	0.0015495	0.02852
hsa05225	Hepatocellular carcinoma	168	39.88	1.4293	0.0016181	0.02852
hsa03410	Base excision repair	33	7.8336	2.0425	0.0016471	0.02852
hsa04310	Wnt signaling pathway	146	34.658	1.4427	0.0024385	0.040113
