# Supplementary material for: Clinical and molecular significance of the RNA m6A methyltransferase complex in prostate cancer
Source: Frontiers journal article supplement (doi:10.3389/fgene.2022.1096071), 2023-01-12
Supplement: Data_Sheet_2.zip [file Supplementary_table_9.xlsx]

## Sheet: S9. LNCaP & C42 comparison
Supplementary Table 9. Comparison of METTL3 regulated genes in LNCaP:C4-2 and m⁶A transcripts identified by miCLIP in LNCaP cells. The list of differentially expressed genes identified following METTL3 knockdown in LNCaP:C4-2 was compared to the list of genes identified to harbour m⁶A in LNCaP cells as reported by Cotter et al., 2021.
				Datasets
				1. shMETTL3 regulated genes in LNCaP:C42 as determined by RNAseq
				2. miCLIP m6A genes reported by Cotter and colleagues, Mol Cancer Res. 2021 Aug;19(8):1398-1411. doi: 10.1158/1541-7786.MCR-21-0014
4675 elements included exclusively in "C42 shM3":
36951	5039 elements included exclusively in "LNCaP: miCLIP":
RBP3	2001-03-01	841 common elements in "C42 shM3" and "LNCaP: miCLIP":
HSD3B1	2002-03-01	UGT2B17
HLA-DRA	2005-03-01	BCHE
PLPPR1	2007-03-01	CCDC85A
BRINP1	2009-03-01	FAM111B
BX324167.1	2005-09-01	SCHLAP1
AC010378.1	2007-09-01	UGT2B15
AC008494.2	2008-09-01	C1QTNF3-AMACR
BX276092.5	2011-09-01	SUSD4
#N/A	2015-09-01	ELOVL6
SLC2A7	A4GALT	FADS2
IL36RN	AACS	CMBL
RHOXF1P1	AAMP	PCDHGC3
BRDT	AAR2	DEGS1
TNFSF10	AARS	SYT4
UGT2B24P	AARS2	RRM2
FAM90A2P	AASDHPPT	PITX1
NPR3	ABAT	CA12
KRT6C	ABCA3	PPFIA2
GCG	ABCB10	MME
AC118754.2	ABCB6	NTNG1
AC096720.2	ABCB8	MCM7
FGF23	ABCC1	GCNT2
RBM46	ABCC4	INSIG1
PCDHA3	ABCD1	LDLR
KLHL1	ABCD3	ADRB2
PLEKHS1	ABCE1	IGFBP3
AC122713.2	ABCF1	CLSPN
OTOP2	ABCF2	TUBB
PCSK9	ABCF3	CLN5
NPR1	ABHD10	ARHGEF26
PGLYRP2	ABHD11	TK1
BX842568.2	ABHD14A-ACY1	CCDC85B
C6orf118	ABHD14B	TUBA1B
GABRA5	ABHD16A	SCD
FOXQ1	ABHD17B	LRRC20
SLITRK3	ABHD2	E2F1
LINC01635	ABHD3	TUBA4A
CCL8	ABHD4	RAP2B
HAGLROS	ABHD5	EBP
DEFB132	ABHD8	MRPL36
GC	ABL1	ADD3
ETNPPL	ABL2	MAOA
INHBA	ABLIM1	TRIP13
ABCD2	ABR	FEN1
LINC02393	ABRACL	STARD3NL
AC093001.1	ABT1	RMI2
THBD	ACAA1	TFRC
VSIG2	ACACA	ALDH1B1
SI	ACAD8	IFIT1
CORO1A	ACAD9	CTXN1
LIPG	ACADS	AMACR
KANK4	ACADSB	TUBG1
TM4SF1	ACADVL	BRI3BP
TUBBP1	ACAP2	NUDT1
AC009264.1	ACAT1	ST6GALNAC1
SCIN	ACBD3	CDC42EP2
CNTNAP2	ACER2	MCM3
AL589182.1	ACKR3	LPCAT1
RPRML	ACO2	PCNA
AC007743.1	ACOT13	PRDX1
CLEC7A	ACOT9	AADAT
GAPDHP38	ACOX1	EGLN3
MALL	ACOX3	VWA1
PREX1	ACP1	PRKAR1B
PTPRQ	ACP2	SLC39A8
UGT2B10	ACPP	MYBL2
AC011933.3	ACSF3	SDHA
IL1R2	ACSL1	SMCO4
PTMAP4	ACSL3	TMEM63B
HSPA8P5	ACTG1	FASN
ACTL8	ACTN1	NTHL1
RPSAP70	ACTN4	UNG
TTPA	ACTR1A	CDK1
UGT2B7	ACTR2	LGALS3BP
GMNC	ACTR3	ACOT7
HPGD	ACTR8	KHDC1
MYMX	ACVR1	IGFBP2
ZBTB7C	ACVR1B	RUSC1
TMEM37	ACY1	DBI
RXFP3	ADAM10	CITED2
CR2	ADAM15	FOXM1
BCYRN1	ADAM1A	AR
AC146944.3	ADAM22	KCNAB2
PRLR	ADAMTS1	C5orf66
CLCN1	ADAR	MCM2
CHST13	ADARB1	MAD2L1
AC092437.1	ADAT1	SLC25A5
CXorf49B	ADAT3	GHR
GBP3	ADCK2	BAMBI
MYB	ADCK3	MRPL16
UGT2B11	ADD1	SORD
SLC4A4	ADH5	SLC35B2
LINC00508	ADI1	NEK6
TUBA3E	ADIPOR1	UBE2T
GASK1B	ADM2	MTFP1
DPY19L2P1	ADNP	UHRF1
OAS3	ADNP2	LARS2
PTGES	ADO	TCF19
AL157373.2	ADPGK	RCC1
HNMT	ADPRHL2	FKBP4
AL008733.1	ADPRM	COX4I1
RASL11A	ADRA2A	LMNB1
DPP4	ADRBK2	SLC25A11
NAV3	ADSS	ARHGDIA
MCM10	AES	B4GALT5
HRH2	AFF1	CSPG5
TERT	AFF4	ZWILCH
SPOCK2	AFG3L2	ERCC6L
UGT2B28	AFMID	DHCR7
MT1DP	AFTPH	CYB5A
TPM1-AS	AGAP3	PBK
ZNF488	AGBL5	RHOB
GJB2	AGFG1	LDOC1
ARG1	AGGF1	CCDC86
UNC13C	AGK	HYAL3
BX119904.2	AGL	ALKBH2
AC009119.1	AGO3	NCAM2
SLC29A1	AGPAT2	SREBF1
AC004835.1	AGPAT3	GEMIN4
SLC16A5	AGPAT5	TLCD1
CRISPLD2	AGPAT6	CAB39L
AC003988.1	AHCTF1	KIFC1
NDP	AHNAK	LY6E
AP003774.2	AHNAK2	FDXACB1
CNKSR2	AIDA	PARP1
RIMS1	AIM1	DDIAS
NR2F1	AIMP1	PTMA
SLC35F3	AIMP2	DHCR24
HMGB1P1	AK1	APEX2
PALMD	AK2	MRPL34
APLN	AK3	CBR1
BTN3A2	AKAP1	SPDEF
LINC01351	AKAP10	SLC27A2
RN7SL689P	AKAP11	KREMEN2
GUSBP3	AKAP13	NR2C2AP
WNT8B	AKAP8	CPOX
NKAIN3	AKIRIN1	MAP2K3
OAS1	AKR1A1	SLC25A10
BX276092.2	AKT1	MCM4
SMIM3	AKT1S1	PAICS
SLC22A18AS	AKT2	CISD3
NRGN	ALAS1	LENG9
TENT5C	ALCAM	MYC
BX324167.2	ALDH16A1	FIGNL1
AC093635.1	ALDH18A1	NETO1
DLX3	ALDH1A3	HSPA1B
SLC45A2	ALDH6A1	MSMO1
HTR3A	ALDH9A1	NAV1
TPTEP1	ALDOA	ECHDC3
PCDH19	ALG10	KIAA0930
TACSTD2	ALG10B	SLC43A2
RPL7AP30	ALG11	CCDC138
RNLS	ALG13	FUCA1
RUNX2	ALG2	FOXRED2
IL27RA	ALG9	PPIF
COLEC12	ALKBH4	POLR2L
ADRA1A	ALKBH5	DCTPP1
PMP22	ALKBH7	WNT7B
AL121672.3	ALMS1	VKORC1L1
DMD	ALOX15	CHCHD1
LGI2	ALPK3	LRRC3
ARLNC1	ALS2	VARS
EDN2	ALYREF	CCM2
RAB3A	AMBRA1	NFE2L3
GSTA2	AMD1	PODXL2
UQCRHP2	AMFR	CHAF1B
ZNF663P	AMIGO2	CPTP
AC008063.1	AMIGO3	SHCBP1
SRPX	AMMECR1	CENPN
TNFAIP2	AMMECR1L	MRPS27
PDZRN4	ANAPC1	SMPDL3B
SAMD9	ANAPC16	HADH
AC008406.3	ANAPC7	UQCR10
AOX1	ANG	KCNMA1
PCLAF	ANGEL1	NCS1
MAB21L4	ANGEL2	DDR1
SHC3	ANK3	IL4I1
PSMB9	ANKEF1	FBXW9
ALOXE3	ANKFY1	CDCA4
ETV4	ANKH	COMT
CD3EAP	ANKIB1	KPNA2
AC011912.1	ANKMY1	SLC30A4
LRRC32	ANKRD10	SH3RF1
AC109466.1	ANKRD11	LYN
APOF	ANKRD12	TRERF1
CT83	ANKRD13A	PODXL
AC092894.1	ANKRD17	PAQR4
AC137932.2	ANKRD27	GADD45GIP1
FEV	ANKRD28	GCNT1
AC004801.5	ANKRD39	TOMM40L
CDH13	ANKRD40	SDC1
OLIG1	ANKRD50	TIMP2
TMEM97	ANKS1A	CD9
WNT10B	ANKZF1	PIK3CB
RAB27B	ANO10	ALG3
DTX4	ANP32A	PFDN6
PRKAG2-AS1	ANP32B	TTLL12
AL136528.1	ANTXR1	PKM
HMGB1P5	ANXA11	FTO
THOC3	ANXA5	PRKACB
SEMA3C	ANXA7	ZWINT
GRAMD2A	AP1B1	RRM1
ELMO1	AP1G1	H2AFX
TMEM270	AP1G2	TUBA1C
HPSE	AP1S1	ACLY
HSPB1	AP2A1	FANCG
ASF1B	AP2B1	LYPD3
MYORG	AP2M1	SF3A3
DPYSL3	AP2S1	RPUSD2
XAGE2	AP3D1	G6PD
GINS1	AP3M1	NME1
C8orf34-AS1	AP3M2	LMNB2
GALNT14	AP3S2	LPAR2
FAM81A	AP4M1	NUDT19
ORC1	AP5B1	HMGN2P46
CLIC2	AP5M1	HSP90AA1
NIPAL1	AP5S1	TSHZ1
APOBEC3B	APAF1	TMEM177
CDC45	APBA2	POC1A
METTL7A	APBB2	ISG20L2
SFN	APC	GOT2
PLCH1	APEX1	ZBTB42
TIMM8AP1	APH1A	PHB
NCEH1	APH1B	HSP90AB1
AC138409.2	API5	PRMT1
AC019069.1	APLP2	SCARB1
COX6B1	APMAP	SLC9A2
IGFLR1	APOA1BP	SIGMAR1
RAD54L	APOO	TCOF1
NRM	APOPT1	PAK1IP1
AC106795.1	APP	SLC19A1
BCAS2P1	APPBP2	MRPS12
PDE4A	APPL2	NT5DC2
PDGFRB	APRT	FARSA
ZNF367	APTX	COBL
ANTXRL	ARAF	EPDR1
AL162151.2	ARAP1	EID1
MMACHC	ARCN1	HOXB13
C4orf46	AREL1	ALG12
DPF1	ARF1	PWP2
C5orf66-AS1	ARF3	CKB
HMGCS2	ARF4	TRAF3
RSPO4	ARF5	BTD
EFHC2	ARF6	RAN
ERVMER34-1	ARFGAP1	SDF2L1
P2RY1	ARFGAP2	CENPO
AL355994.2	ARFGAP3	PRPS2
SH2D2A	ARFGEF1	SLC25A23
NKAIN3-IT1	ARFIP2	RANBP1
GLP2R	ARG2	RHOV
CRISP3	ARHGAP11A	SNRPN
PLD1	ARHGAP12	LSS
TUBA3D	ARHGAP17	ATAD2
FERMT1	ARHGAP29	SHROOM3
PDSS1	ARHGAP32	RPUSD1
CCDC177	ARHGAP35	FANCI
PTMAP5	ARHGAP5	HSPH1
AL121758.1	ARHGAP6	TMEM132A
CHRNA5	ARHGEF11	CCT3
VAV3	ARHGEF12	SHQ1
FAM131C	ARHGEF18	GRHPR
IFITM1	ARHGEF4	BRAT1
AC073578.1	ARHGEF5	GMCL1
AP000697.1	ARID1A	NACC1
BDKRB1	ARID1B	DBNDD1
RAD51	ARID2	SVIP
TPI1P1	ARID4B	ICMT
CSNK2A3	ARID5A	YWHAH
LINC02595	ARIH2	ARPP19
SERPINI1	ARL1	MAFB
GLA	ARL13B	PDCD2L
CMTM8	ARL14EP	PRR7
PPIAP22	ARL15	TRAPPC1
CFAP99	ARL2	LYSMD2
ADAMTSL3	ARL2BP	GAPDH
LRRC45	ARMC1	TPI1
TRIB2	ARMC6	DNMT1
LRRTM4	ARMC8	TSPAN3
ADCY1	ARMCX3	TUBB4B
CDC6	ARMCX5	RNF167
RDH12	ARPC2	MYO19
ESCO2	ARPC4	SLC25A1
LRRC37A7P	ARPC4-TTLL3	OAZ1
FNDC10	ARPC5	TIMM8A
KLHDC7A	ARPC5L	PFAS
AKAP5	ARPIN	STMN1
SLC5A4-AS1	ARRB2	SUFU
AC116351.1	ARRDC1	AUNIP
SLC16A3	ARRDC2	B4GALT2
JAKMIP1	ARRDC3	NDUFS2
TMPRSS11E	ARSB	BID
NMU	ARSD	MAEA
GALNT17	ARSG	MRPL14
RHBDL2	ARSK	GPATCH4
RNASEH2A	ARVCF	HIBADH
RPS10P3	ASAH1	NUDT8
SNAI1	ASB16-AS1	OGDH
BMP6	ASB3	BRIP1
P2RX5-TAX1BP3	ASB6	MTFMT
GLYATL2	ASB7	H2AFZ
RFLNB	ASB8	MYADM
HASPIN	ASCC1	RAVER1
MCM5	ASCC2	C1QBP
FN3KRP	ASCC3	PCYT2
S1PR5	ASF1A	SLC25A19
CA8	ASH1L	JUP
LRATD1	ASH2L	POLA2
SLC6A6	ASNA1	PRR15L
SNRPGP10	ASNS	NDUFB6
MAP1A	ASNSD1	TBRG4
GJB1	ASTE1	GPI
GPER1	ASXL1	ARTN
GAPDHP1	ATF1	MELK
NEDD9	ATF2	TIMM21
IL1RN	ATF4	UBL4A
AC129492.2	ATF5	VDR
SERBP1P5	ATF7IP	NUAK2
ALB	ATG101	MNX1-AS1
STXBP6	ATG13	PDZRN3
AL592071.1	ATG2A	DNAJC30
HNRNPA1P7	ATG2B	MTUS1
C16orf74	ATG3	ZNRF3
KCNS3	ATG4A	RBBP7
ZFPM2-AS1	ATG4B	LPCAT3
LIPH	ATG4C	CAPNS1
C8orf34	ATG5	BDH1
AMER1	ATHL1	MCMBP
RASL11B	ATIC	HILPDA
TFPI	ATL2	MESP1
NCAPH	ATL3	ST14
CTSV	ATMIN	RASSF5
TGFBR3	ATN1	BZW2
HLA-DPA1	ATP11A	PTGFRN
MAMLD1	ATP11B	SYNGR2
HBQ1	ATP13A3	PRPF4
GALNT18	ATP1A1	FAM83D
FAM222A	ATP2A2	BEND3
DCK	ATP2B1	EPB41L1
POLD1	ATP2C1	EMC6
ASPH	ATP5A1	BRIX1
NAP1L2	ATP5B	GRWD1
DSCC1	ATP5C1	UBQLN2
PDE3B	ATP5D	SRM
WT1	ATP5E	MRPL44
P3H2	ATP5EP2	METTL9
LDHAP4	ATP5F1	MCAT
LRG1	ATP5G3	CALM3
GLDC	ATP5I	CHST14
RPL7AP6	ATP5J	NFIC
UGT2B27P	ATP5J2	CHDH
BCAN	ATP5J2-PTCD1	ENDOD1
WNT6	ATP5L	FKBP5
BX322639.1	ATP5O	MGAT5
ADGRD2	ATP6AP1	ISOC2
E2F2	ATP6V0C	LCMT2
PRIM1	ATP6V0E1	CD320
HSP90AA2P	ATP6V0E2-AS1	F2R
RHPN1-AS1	ATP6V1C1	MAGEF1
SMAD6	ATP6V1D	LRRC26
HMGN5	ATP6V1G1	NDC1
LINC02197	ATP6V1G2-DDX39B	EMP2
TMEM171	ATP8B1	TOMM22
RCN3	ATP9A	TMEM52
TMEM173	ATPAF1	RNF126
DUSP2	ATPAF2	FDFT1
TEAD4	ATPIF1	IMP4
OSR2	ATRAID	NUP210
HCLS1	ATRIP	SOX8
PHLDA2	ATRN	ABHD17C
WSCD1	ATXN2	KDM1A
RFC2	ATXN2L	ASB13
CDH3	ATXN7	CCNE2
AC124068.2	ATXN7L2	UNKL
TMEM74	ATXN7L3	PARP12
UPB1	ATXN7L3B	CD276
TYRP1	AURKAIP1	F8A1
PLA2G2A	AVL9	NKX3-1
JPT1	AXIN1	EPN3
PLIN3	AZGP1	RTKN
GINS4	AZI2	TMED9
STAB1	B2M	IGSF8
WDHD1	B3GALNT2	NIPSNAP1
LRP8	B3GALT6	SOX12
BX276092.7	B3GALTL	CTSH
EIF4BP7	B3GNT1	MRPS30
CDCA7	B4GALT3	ACTB
GM2A	B4GALT7	TOB1
TRIM14	BABAM1	RRS1
PTMAP2	BAD	LRFN1
PADI2	BAG3	ADIPOR2
TMEM109	BAG4	SMS
PNP	BAG5	MARVELD1
SESN3	BAHD1	SAC3D1
CENPQ	BAIAP2	RNPEP
PPFIA2-AS1	BAIAP2-AS1	ZADH2
SUSD2	BAIAP2L1	MBOAT7
FADS1	BAP1	RDH11
EFR3B	BARD1	ERMP1
HIST2H2AC	BAX	COX7A2
C20orf27	BAZ1A	NRSN2
TMEM158	BAZ1B	LAP3
ASRGL1	BAZ2A	FAHD1
LINGO1	BBIP1	NOC2L
TUBB2A	BBS2	TKT
ZBBX	BBS4	GTF2H2
NEIL2	BBS7	C5orf38
ACSL5	BBX	C5orf24
ITGA1	BCAP31	UXS1
RNF152	BCAR1	CYB5B
VWF	BCAR3	C19orf53
AC010331.1	BCCIP	HSD11B2
NLE1	BCDIN3D	TMEM160
AP001000.1	BCDIN3D-AS1	TMEM159
CDR2L	BCKDK	EME1
IRX2	BCL10	CACNB3
PRR15	BCL2L1	MRPS2
RGCC	BCL2L12	BSG
VSIR	BCL2L13	MMP15
TYMS	BCL2L2	MRPS17
REEP4	BCL2L2-PABPN1	ATP6V0E2
PTGS1	BCL3	VCL
CDK2	BCL7A	DAXX
TBXAS1	BCL7B	DGAT2
GGCT	BCL9	MYCBP
SECTM1	BCL9L	SQLE
LINC01770	BCLAF1	KNOP1
TMEM144	BCOR	PGAM5
SNRPD3	BCR	LRFN3
UQCRFS1P1	BDP1	SUOX
ACAT2	BECN1	SNN
GAMT	BET1L	HNRNPD
EPOP	BFAR	TRAPPC9
RPSAP47	BHLHE40	GPX1
LPCAT4	BIK	CFL1
STX19	BIN1	SCNN1A
PSMC3IP	BIN3	R3HDM1
MCM6	BIRC2	UBE2L3
ATP1A3	BIVM	KIAA1522
NOX5	BLCAP	RAB8A
CCND3	BLMH	ELOVL1
AL590666.2	BLOC1S1	EIF5A
MIR4435-2HG	BLOC1S2	NCL
HMGA1	BLOC1S3	STEAP1
IGF1	BLOC1S4	TRAPPC5
ZBTB45	BLOC1S5	CYCS
IDH2	BLOC1S5-TXNDC5	RUVBL1
IL32	BLVRA	SREBF2
MNS1	BMF	PGD
CPSF1P1	BMI1	TRIM25
SUV39H2	BMP8B	PIK3C2B
CENPX	BMPR2	PRDX6
SEMA3G	BMS1	DHX36
AC007342.4	BNIP2	AHCY
TMSB10	BNIP3	IDI1
SHC4	BNIP3L	STRIP2
ADRB1	BOD1	SLC35A4
LINC00115	BOD1L1	MAPKAPK3
AC012085.1	BPHL	KAT2A
SUV39H1	BPTF	CALR
AC131392.1	BRCA1	RPS15
RASD2	BRCC3	MARCKSL1
AC025575.2	BRD1	MRPL4
ALG8	BRD2	RPA1
ISL1	BRD3	DDX10
PROCR	BRD4	ZNF107
DLAT	BRD8	LDHA
ZNF385B	BRK1	SUCLG2
SERTAD4	BROX	NFIX
GPRC5B	BRPF1	TAPBP
HMGB1	BRPF3	DNAJB1
PRIMA1	BRWD1	ABHD6
PIM2	BSCL2	AHSA1
SEMA3F	BSDC1	ADAM9
ARC	BSPRY	NOA1
PKMYT1	BTBD1	DGKB
SLC30A3	BTBD10	NOL6
ST6GALNAC4	BTBD2	GLRX5
HLA-DMB	BTBD6	TSFM
TRNP1	BTBD7	TMEM189
GDF11	BTBD9	BYSL
VDAC1	BTF3	RAB11A
FRG1BP	BTG3	POFUT1
ATP5MC1	BTN2A2	TFDP1
POLR3K	BZW1	GLS
HBM	C10orf32	AGRN
LDHAP3	C10orf88	SNRNP25
ENO2	C11orf1	RNF26
SLF1	C11orf24	CCDC77
MLKL	C11orf30	PRDX2
SAMD1	C11orf48	IVD
LHX6	C11orf49	GLYATL1
APEH	C11orf52	CSE1L
BUB1B	C11orf57	GNB4
CFAP46	C11orf58	LACTB
C1DP1	C11orf68	RAB35
LINC00632	C11orf71	RPL22L1
LNX1	C11orf73	SLC39A10
ADAMTS3	C11orf83	NKRF
CHEK1	C11orf84	YARS2
SLC1A3	C12orf43	ARL4D
VASH2	C12orf5	CDCP1
TXN	C12orf65	MRPL17
ITPKA	C12orf66	SLC39A3
SPC24	C12orf76	YWHAG
FGD3	C14orf119	CYB561A3
TLR3	C14orf159	ETFDH
STEAP3	C14orf166	CCT5
KHK	C14orf79	FANCB
LSM3	C14orf80	NDST1
ICOSLG	C15orf38-AP3S2	FBRSL1
CENPH	C15orf39	SCAMP4
PHOSPHO1	C15orf61	FZD1
CYP2J2	C16orf13	KIF1C
AC027307.3	C16orf45	PRRG1
EIF4BP6	C16orf58	YDJC
SLC37A4	C16orf70	PPARD
TYMSOS	C16orf72	HSBP1
PARVB	C16orf86	GEMIN6
GLRX	C16orf91	RITA1
EIF5AL1	C17orf62	MICA
MUC5B	C17orf70	RMI1
RHOBTB1	C17orf80	NDUFB5
PLD2	C17orf85	NUDT16P1
ACER3	C17orf89	COLCA1
SPHK1	C18orf25	EIF3B
CHRNA7	C18orf54	PARD6A
HUNK	C19orf10	SLC44A2
AC125807.2	C19orf12	TSR1
PRKX	C19orf24	TRMT10C
KCNQ5	C19orf25	RABIF
ATP5MC3	C19orf43	ARL6IP5
SLC9A3R2	C19orf48	PIGW
AC092919.2	C19orf52	B4GALNT4
PRR19	C19orf60	TMEM134
GALNTL6	C1GALT1C1	ADORA2B
BANK1	C1orf115	UCK2
WDR76	C1orf116	PDZD8
TAP2	C1orf122	DAG1
TFR2	C1orf123	THAP7-AS1
REEP6	C1orf198	UBE2N
MICB	C1orf21	PIGU
AL391988.1	C1orf226	ORAI1
LRRC31	C1orf233	SLC12A8
CTSC	C1orf27	NDRG2
ADGRG6	C1orf43	ITPR3
CBR3	C1orf86	POLR1C
PYCR3	C20orf196	PA2G4
NTNG2	C20orf24	PIGS
FAM234B	C21orf119	MT1X
CHEK2	C21orf33	PDK3
AL365181.2	C21orf58	F2RL1
NUP37	C21orf59	NETO2
AL391832.2	C21orf67	DOLK
GLS2	C21orf91	ZNF883
FARP2	C22orf29	MTAP
UQCRHL	C22orf39	TEX2
DFFB	C22orf46	MEX3D
HECW2-AS1	C2CD2	CLUH
PPA1	C2orf43	HCCS
PIWIL4	C2orf47	RABL3
CCDC60	C2orf68	ACADM
CCDC80	C3orf17	E2F3
HOMER1	C3orf33	CD81
SOWAHD	C3orf58	PDF
FRMD3	C4orf3	PDIA5
PARPBP	C5orf15	KRTCAP3
CENPK	C5orf28	NIPAL3
PPIA	C5orf30	HES4
EEF1B2P3	C5orf51	DCUN1D5
ARRB1	C5orf55	POLDIP2
AL513497.1	C6orf106	MANEA
PLPP1	C6orf120	GRPEL1
CBX1	C6orf132	SPSB2
CACYBP	C6orf203	SPRYD4
MOSPD3	C6orf226	PRCC
AC005586.1	C6orf47	GLO1
HYDIN2	C6orf48	TM9SF4
PLAAT4	C6orf62	NOP16
TMEM201	C6orf89	HINT2
ELL3	C7orf25	CRYBG3
NAGA	C7orf26	CBX4
NDUFB3	C7orf49	ZNF605
OGDHL	C7orf50	ELOVL7
HAUS8	C7orf55-LUC7L2	CWC25
MYD88	C7orf63	ZNF518A
HMGB1P6	C7orf73	MSANTD2
DNAAF5	C8orf37	DNAJC1
TONSL	C8orf4	PBRM1
ZNF813	C8orf58	FRMPD1
AL441992.1	C8orf76	C15orf65
CDHR3	C8orf82	NR2C2
AC026689.1	C9orf114	ZNF703
PACSIN1	C9orf152	VPS54
NUTF2	C9orf156	ZCCHC8
EYA2	C9orf41	RRAGD
CDK14	C9orf69	JMY
TEDC2	C9orf78	KDM3A
CDCA5	C9orf91	MEX3C
GPR137B	CAAP1	ZNF10
GBX2	CAB39	FICD
FAM189B	CABIN1	ZBTB10
CS	CABLES2	CREBZF
ZNF273	CACFD1	SLC29A4
SCARA3	CACTIN	ZNF577
CHRNE	CACUL1	HYOU1
AC023301.1	CAD	MOCOS
COL9A3	CALCOCO2	BIRC6
SLC7A8	CALD1	LINC00339
FAM102B	CALM1	ZNF274
HMCES	CALM2	MSTO2P
AL365181.3	CALML3	CSRNP2
AC011043.1	CALML4	ADAM17
AL451069.3	CALU	ZNF460
HFE	CAMK1	YPEL5
TMEM191B	CAMK2B	MTG1
GUSBP2	CAMK2D	ZNF891
ARHGEF26-AS1	CAMK2G	DPY19L3
RABEP2	CAMK2N1	PGM3
AC008764.6	CAMKK1	RNF103
COX10	CAMKK2	ATF6
C1R	CAMLG	LIPT1
AP001972.5	CAMSAP1	PLK2
TMEM183B	CAMSAP2	TBC1D8
WT1-AS	CAMSAP3	SPATA18
DACT3	CAMTA1	ZBED3-AS1
TRHDE	CAND1	ZNF419
TNFRSF1B	CANT1	PRPF39
DUSP9	CANX	ARRDC4
CCDC117	CAP2	SH3GLB1
ZDHHC12	CAPN1	MYSM1
E2F8	CAPN2	BTG1
HAGLR	CAPN7	CCDC71L
PLEK2	CAPRIN1	LINC00963
BEX3	CAPRIN2	AMOTL2
CLUL1	CAPZA1	POLE
AC144652.1	CAPZA2	ZNF862
PRXL2B	CARHSP1	RAB3IL1
AL450326.1	CARKD	WDR27
MAGI3	CARS	FOXP1
TLCD3B	CASP2	TMEM175
FHOD1	CASP3	DOCK5
MAGEA1	CASP8	HSPA5
CBLN2	CASP9	ZNF700
SFTPA2	CASZ1	ARGLU1
UGT8	CBFB	ARHGEF2
PFKP	CBLL1	ZNF587
WRAP53	CBLN3	ALDH3A2
MASTL	CBR4	ARHGAP26
WASIR1	CBS	HEIH
USP2-AS1	CBX2	ATP2C2
ASPHD1	CBX5	CPEB4
FAM53B	CBX6	LENG8
ST3GAL5	CBX7	RB1CC1
AKR7A2	CBX8	TRPV6
RPL13P5	CBY1	SLC9A8
PCAT1	CC2D1B	AAK1
LINC02012	CCDC102A	CDKN1A
ARHGEF3	CCDC107	N4BP2L2
AC104809.2	CCDC112	CEP95
MGMT	CCDC115	GAS5
Z99572.1	CCDC12	PTPN13
LYPD6	CCDC120	ZNF568
INCENP	CCDC124	DYNC1H1
AL450405.1	CCDC125	LTN1
GSTA1	CCDC126	ISCU
LRRC73	CCDC127	SPATA7
TSPO	CCDC130	PMS1
FXYD5	CCDC137	ZNF789
PIMREG	CCDC149	RORC
CDT1	CCDC18	MR1
SLC9A3R1	CCDC22	TTC14
HCFC1R1	CCDC47	C7orf31
HYAL1	CCDC51	ZNF83
TMEM241	CCDC57	ZNF350
B4GAT1	CCDC59	WDR5B
ZNF850	CCDC6	TBC1D4
PTDSS1	CCDC71	ZNF839
CRTAP	CCDC85C	GOLGB1
CNGA1	CCDC88C	ARID5B
IFITM3	CCDC92	ALKBH6
MRPL2	CCHCR1	ZNF780B
HOXC8	CCNC	ARL6IP4
NUDC	CCND1	ZNF211
DLL3	CCNF	BTAF1
AP001505.1	CCNG1	C1RL
EPHA3	CCNI	P4HA2
EIF3FP3	CCNL2	FERMT2
ABHD17A	CCNT1	KIF5C
EXO1	CCNY	PRPF3
RDH16	CCP110	WSB1
IFITM2	CCRN4L	CBFA2T2
AC007342.5	CCT4	MDM4
PRPS1	CCT6A	NR1D2
FA2H	CD151	SLC25A36
HLF	CD164	CCDC14
SORL1	CD24	VMAC
SOD2	CD2AP	ZNF528
AP002990.1	CD46	KLK3
TDRD1	CD58	TSPYL2
TMEM191A	CD59	CCT6B
ECT2	CD63	PLA2G6
BTN3A1	CD97	FBXO42
HMGB1P10	CD99L2	ZNF43
PRADC1	CDADC1	FAM218A
RFC3	CDAN1	THBS1
ACAA2	CDC16	MC1R
GAL	CDC23	RBM5
TECR	CDC27	SESN2
NAPEPLD	CDC34	CTBP1-AS
AC092295.2	CDC37	FLCN
VAMP8	CDC42BPA	ISG20
CCDC87	CDC42BPB	ZNF182
HNRNPA3P6	CDC42EP4	EFHC1
FANCC	CDC42SE1	MAPK8IP3
PPP1R14BP3	CDC42SE2	DICER1-AS1
TIMELESS	CDC5L	ZNF84
TICRR	CDC7	CYP2R1
APC2	CDC73	SQSTM1
SLC25A22	CDCA2	ZIK1
CCNA2	CDCA8	ZNF558
FANCE	CDH1	KLHL29
MPZL2	CDIP1	SNHG8
CMAS	CDIPT	DMTF1
TSEN34	CDK12	GOLGA4
DPY19L1	CDK13	KCNC3
TMEM38A	CDK16	SAT1
AC007318.1	CDK19	ZNF337
ULBP2	CDK2AP2	NKTR
TRAP1	CDK4	CCPG1
AC120114.1	CDK5RAP2	ERN1
WDR77	CDK9	MLPH
CLU	CDKN1B	ELF3
CITED4	CDKN2AIP	NBPF1
RTN4RL2	CDR2	IRS1
RBL1	CDS1	METTL3
CDK5R1	CDV3	DDX39B
VSIG10L	CDYL	FAM200A
NCAPG2	CDYL2	HOXB6
SHMT1	CEBPA	TCP11L2
PDHA1	CEBPB	BEX2
PAPSS1	CEBPD	ENOSF1
EHMT2	CEBPG	PLA2G4B
FAM86C2P	CEBPZ	PLEKHA6
GALK1	CECR5	NDUFA7
JPH1	CELF1	VEGFA
FASTKD1	CELSR1	ZNF222
AC005837.1	CELSR2	KLHL24
APOL6	CELSR3	EGLN2
RPL7A	CENPB	IPO5P1
HDHD5	CENPBD1	HEMK1
RFX5	CENPBD1P1	ANKHD1
FAM216A	CENPE	SLC22A3
TRIM58	CENPF	SLFN5
AP001527.2	CENPU	KRCC1
SKP2	CEP104	PILRB
USP43	CEP152	TOP3B
ALG1	CEP170B	ZNF841
RAB36	CEP192	MARCKS
CYP51A1	CEP44	GTPBP2
SH2B3	CEP57	GADD45A
FAM50B	CEP63	SPIRE1
GCH1	CEP78	GDF15
CDK2AP1	CEP83-AS1	ZNF554
HOXC12	CEP97	TCEAL3
EPB41L2	CERS2	UAP1L1
GLB1L2	CERS4	ZFAS1
FAM86EP	CERS6	BBS1
AC099568.2	CETN2	ZNF251
NPM3	CGGBP1	ZBTB16
AC004771.3	CGN	ZNF449
OSBPL5	CGNL1	PRR5-ARHGAP8
POLRMTP1	CGRRF1	NDRG1
AC018755.3	CHAC1	BEST1
BX679664.3	CHAF1A	TXNIP
OXA1L	CHAMP1	ZNF502
S1PR3	CHCHD4	DNAJB9
PROM2	CHCHD7	PHYKPL
FZD4	CHD1	ZNF85
HSDL2	CHD2	ARHGAP8
ITGB7	CHD3	CERS1
AC010643.1	CHD4	TUBA1A
GGH	CHD6	ZNF506
ZNF551	CHD8	PXDN
AP1S3	CHERP	PEG3
GINS3	CHKA	LYRM9
AC138904.1	CHML	JMJD7-PLA2G4B
MGST2	CHMP1A	DSP
PSMB8	CHMP1B	EPB41L4A-AS1
SLC7A2	CHMP2B	ZNF410
AKAP7	CHMP3	CCNL1
EFHD2	CHMP4B	GABPB1-AS1
HNRNPA1P48	CHMP6	THRB
FGFR4	CHMP7	TFAP2E
KIF16B	CHPF	SLC25A29
MCTP1	CHPF2	MATR3
DBT	CHRNA2	SLC25A27
GINS2	CHST12	CHMP4A
TMEM102	CHSY1	DHRS3
THOP1	CHTF18	CCDC17
HOXC9	CHTF8	CBR3-AS1
LIMS1	CHTOP	IRS2
GOLIM4	CHURC1	DDIT3
RMDN1	CIAO1	USP32P2
SMAP2	CIC	PDE10A
AC099336.2	CINP	GOLGA8B
RRP9	CIPC	OGT
PLP2	CIR1	ZNF827
INAVA	CIRBP	GPRIN2
TTF2	CIRH1A	C1RL-AS1
AK7	CISD1	ZNF559-ZNF177
SELENOH	CIT	DDX47
NES	CKAP2	ANKHD1-EIF4EBP3
IRX3	CKAP4	ZNF334
CBX3	CKAP5	TENM1
AP003721.1	CLASP1	LTB4R
BOLA3	CLCC1	BCKDHA
FFAR2	CLCN3	CACNA1H
LINC01169	CLCN7	MALAT1
IFI6	CLDN12	ATF3
SLCO4A1	CLDN3	MAF
MMP24OS	CLDN4	PTPRM
GNAI1	CLDN7	SH3BP5-AS1
RPS6KA4	CLDND1	ICA1L
AIF1L	CLEC16A	SOCS2
B4GALNT1	CLIC4	FOXD1
IKBKE	CLINT1	KLF4
COTL1	CLIP1	IGF1R
CLDND2	CLN8	TGM1
CDKN2C	CLP1	TRPM8
LINC01270	CLPB	AGAP5
QARS	CLPTM1L	NEAT1
MND1	CLSTN1	IL20RB
MAFG-DT	CLTA	NANOS1
POM121	CLTC	PABPC5
RMDN3	CLUAP1	ACAD11
TAP1	CMC2	BMPR1B
MREG	CMIP	SHC2
PEX5	CMPK1	AKAP12
SPIN4	CMTM6	ZMAT1
CYTOR	CMTR2	LARP6
CROCC2	CNBP	DIO3
PGF	CNDP2
AC093904.4	CNIH1
SNHG10	CNIH4
RSL24D1	CNNM2
NCBP2AS2	CNNM3
SCFD2	CNNM4
PLLP	CNOT1
FARS2	CNOT2
PNPO	CNOT3
TYRO3	CNOT8
FP565260.1	CNP
LIN7A	CNPY3
ACTR3B	CNPY4
ALX4	CNST
MTHFD1	COA1
PAK4	COA3
RNASEH2C	COA4
RGL1	COA6
NEIL3	COA7
TMEM120B	COBLL1
MDH2	COG5
LSM2	COG8
CEP72	COL4A3BP
RFC5	COL4A5
CTPS1	COL6A1
CLCN2	COL6A2
XAGE1B	COLGALT1
PERM1	COMMD3-BMI1
MYL6	COMMD4
SPTLC3	COMMD5
DEPTOR	COMMD6
MEX3A	COPA
AIFM1	COPB1
L2HGDH	COPB2
MRPL24	COPE
GATD3B	COPG1
SH2B2	COPG2
AC090971.3	COPS2
P3H4	COPS3
POLQ	COPS4
PYGL	COPS6
PCDHGA8	COPS7A
KCNJ12	COPS7B
AC006504.5	COPZ1
HTRA2	COQ10B
TEX15	COQ4
HCP5	COQ5
SKA2	COQ7
NPTX2	COQ9
LEO1	CORO1B
NPTN	CORO2A
RAI14	COX11
RPL7L1	COX14
DOK7	COX15
SNTB1	COX16
MTLN	COX19
ZMYND10	COX5B
AC073195.1	COX6C
SNRPA	COX7A2L
WARS2	COX7C
NUP85	COX8A
ZHX3	CPD
AC004057.1	CPEB3
HMGN2P5	CPNE1
RPS26	CPNE2
FP565260.3	CPNE3
RHOD	CPNE7
ACBD7	CPPED1
TAGLN2	CPSF1
MRPS36	CPSF2
CORO1C	CPSF3L
C17orf53	CPSF6
RAPGEF5	CPSF7
CDCA3	CPT2
ALDH3B2	CRACR2B
SH3BP1	CRAMP1L
HSPA4L	CRAT
PRIM2	CRB3
PEX16	CRCP
GTF2H2C	CREB1
NMB	CREB3
SH3PXD2B	CREB3L4
EEF2KMT	CREBBP
RPL4P4	CREBL2
WDR62	CREG1
CDC20	CRELD2
BCAS1	CRIPAK
CISH	CRK
AL139393.3	CRKL
OAF	CRLS1
SIK1B	CRNKL1
MCTS2P	CRTC3
STARD4	CRYL1
WDR34	CSDE1
FOXP4-AS1	CSK
BZW1P2	CSMD1
KIF20A	CSNK1A1
RECQL4	CSNK1D
UQCRC2	CSNK1E
TLL2	CSNK1G1
CKMT1A	CSNK1G2
MESP2	CSNK1G3
TMEM243	CSNK2A1
SAMHD1	CSNK2B
TOMM40	CSRNP1
ARV1	CSRP1
C19orf73	CSRP2BP
ATP1B1	CST3
SAMD10	CSTB
B3GNT4	CSTF1
NUP35	CSTF2T
RHBDF2	CTAGE5
VRK1	CTBP1
TWNK	CTBP1-AS2
STC1	CTBP2
SYCE2	CTC-338M12.4
CD83	CTC1
NHLRC1	CTCF
ICAM5	CTDNEP1
EPHX4	CTDP1
KANK2	CTDSP1
CAPN13	CTDSP2
LIMK1	CTDSPL
ALDOC	CTDSPL2
MYPOP	CTIF
LPP-AS2	CTNNA1
ADCY9	CTNNB1
WNT10A	CTNNBIP1
VPS4B	CTNND1
CADPS2	CTNS
NKD1	CTR9
SEMA7A	CTSB
RGS14	CTSD
DCLRE1B	CTSZ
BOK	CTTN
GAGE2A	CTTNBP2NL
XAGE1A	CTU2
FKBP9	CUEDC1
SPNS3	CUEDC2
METTL8	CUL1
SHROOM2	CUL2
MMS22L	CUL3
LINC01315	CUL4A
AC109635.3	CUL4B
FAM20C	CUL5
MRTO4	CUL7
AC090204.1	CUL9
TNS2	CWC15
GABRA3	CWF19L2
DPP3	CXADR
DTL	CXorf38
CENPS	CXXC1
RGS19	CXXC5
HMOX2	CYB561
TMPO-AS1	CYB561D2
AC080112.1	CYB5D1
TDG	CYB5D2
TSPAN7	CYB5R1
C17orf67	CYB5R3
TRIM2	CYFIP2
SEPTIN3	CYHR1
AGPAT1	CYSRT1
PAGE1	CYSTM1
NUP153	CYTH3
AC209154.1	D2HGDH
PLCXD2	DAAM1
UBB	DAD1
TPX2	DAGLB
CXCL16	DAK
AC093249.6	DANCR
RNASEH1-AS1	DAP
CEP83-DT	DAP3
HPCAL1	DAPK3
MICOS13	DARS
NR2F1-AS1	DARS2
TMEM223	DAZAP1
PEPD	DBF4
CENPM	DBNL
CHAC2	DCAF10
C19orf57	DCAF16
PPA2	DCAF17
HELLS	DCAF5
FRK	DCAF6
RPL3P4	DCAF7
AL590326.1	DCAF8
ISYNA1	DCAKD
PRICKLE3	DCP1A
TEX30	DCP2
SNHG31	DCPS
RIMBP3	DCTD
CENPW	DCTN4
PRDX3	DCTN5
DMAC1	DCTN6
RBM24	DCUN1D1
CCDC134	DCUN1D2
TUBD1	DDA1
TMEM229B	DDB1
FAM122B	DDB2
AC104667.2	DDHD1
DHODH	DDI2
PDSS2	DDIT4
SLC2A4	DDRGK1
ELOF1	DDT
EIF4B	DDX17
HOXA3	DDX19A
POGLUT2	DDX20
IRX5	DDX21
HEBP1	DDX23
DNPH1	DDX24
NECTIN3	DDX26B
GTSE1-DT	DDX28
CRYZ	DDX31
HNRNPA1	DDX39A
HACD3	DDX3X
SLCO3A1	DDX3Y
PHETA1	DDX41
FAM174C	DDX42
MYRIP	DDX49
TTC9	DDX5
SMIM30	DDX51
ATAD3A	DDX52
NOVA1	DDX54
SFXN5	DDX55
POP1	DDX56
GRB14	DDX59
HIST1H2BL	DDX6
KLF16	DEAF1
SLC36A1	DECR1
TMEM64	DECR2
GSTM3	DEDD
XRCC2	DEDD2
PGAM1	DEF8
SH3BGRL3	DEK
PUS1	DENND1A
CLN6	DENND4A
CACNB2	DENND4C
RAPGEF2	DENND5A
DDX60	DERL1
LRRC46	DERL2
FOXO1	DESI2
CLDN8	DET1
CYP46A1	DEXI
MAJIN	DGCR14
HYI	DGCR2
NBAS	DGCR8
PROB1	DGKD
KDM7A	DGKQ
AC116025.2	DHPS
IFT27	DHRS13
AC091729.3	DHRS4-AS1
ZNF658B	DHRS7
CLUHP3	DHRS7B
C22orf23	DHX15
NIPAL2	DHX29
AOC3	DHX30
NPAS1	DHX32
LERFS	DHX38
ZNF471	DHX40
KCNG1	DHX9
PKDCC	DIABLO
TCEA1P2	DICER1
ZNF514	DIDO1
MORN3	DIEXF
PROCA1	DIP2A
KATNAL2	DIS3L
ERCC5	DKFZP586I1420
EML6	DLD
NKAPP1	DLG1
ODF2L	DLG3
CDC42EP3	DLG5
RBM39	DLGAP4
CORO7	DLST
EP400P1	DMXL1
UFM1	DNAAF2
TBX19	DNAJA1
GARNL3	DNAJA2
PRTG	DNAJA3
MAPK8IP2	DNAJC10
S100A4	DNAJC11
ZNF302	DNAJC14
AC026471.4	DNAJC25
BTNL9	DNAJC3
MTMR11	DNAJC5
MLLT11	DNAL4
LINC-PINT	DNASE1
RALGPS1	DNASE2
AFG3L1P	DNLZ
WDR19	DNM1L
ZNF165	DNPEP
SLC2A11	DNTTIP2
ZNF582-AS1	DOHH
AL773545.3	DONSON
AC132872.1	DOT1L
PTPN21	DPCD
SCYL3	DPH1
ARHGEF6	DPH2
TIMM23B	DPH5
AL391684.1	DPH7
WDR45	DPM2
ITFG2	DPP7
EFNB3	DPY19L4
SEC24D	DR1
SVIL	DRAM2
APOE	DRG2
TGFB3	DROSHA
AFDN	DSC2
JAK2	DSCR3
UGDH-AS1	DSEL
EPS8L1	DSG2
PTPRB	DSN1
WIPI1	DSTN
TSHZ2	DSTYK
LINC00869	DTD2
AC005332.3	DTNB
TIA1	DTX2
MYO15B	DTX3L
ZNF677	DTYMK
PXK	DUS1L
NICN1	DUS3L
ASB16	DUS4L
AL031282.2	DUSP1
SNX24	DUSP10
HIST3H2BB	DUSP12
NR6A1	DUSP14
NUDT13	DUSP16
CLCN5	DUSP23
GKAP1	DUSP3
SLC6A16	DUSP4
NOXA1	DUSP8
FGFR3	DVL1
SLC25A21-AS1	DVL3
AC073389.3	DYNC1LI1
BORCS7	DYNC1LI2
ZNF846	DYNLL1
AC004890.2	DYNLL1-AS1
AP000866.1	DYNLL2
APBB3	DYNLRB1
CEP290	DYNLT1
L3MBTL3	DYRK1A
TRAF3IP2-AS1	DYRK1B
SDHAP1	DYX1C1-CCPG1
STAG3L3	E4F1
WASH3P	EAF1
AP5Z1	EARS2
CCDC83	EBAG9
CCDC146	EBLN3
SH3RF3	EBPL
SYNPO	ECE1
CUTALP	ECH1
GRID2IP	ECHS1
WDR73	ECI1
AC073869.1	ECI2
ZGLP1	ECSIT
OTUD1	EDC3
LINC00899	EDEM1
LRRC37A3	EDEM3
TCEAL9	EDF1
MT-CYB	EDRF1
UFL1	EEF1A1
HCG18	EEF1A2
PAXBP1-AS1	EEF1B2
RCOR2	EEF1D
ESPNL	EEF1E1
NDUFA13	EEF1E1-BLOC1S5
SEMA6C	EEF1G
SNHG17	EEF2
AC093157.1	EEF2K
AC138969.1	EEFSEC
CCDC7	EEPD1
ZNF385C	EFCAB14
AL021368.2	EFNA1
MCFD2	EFNA4
PUS10	EFNA5
POLR2J3	EFNB2
HECTD2	EFR3A
GNAS-AS1	EFS
ANKRD6	EFTUD1
CCDC88A	EGFR
AC135983.2	EGLN1
NFATC2	EHD1
H1FX-AS1	EHD3
AC004706.3	EHD4
AP3B2	EHF
GRIP1	EHMT1
CHRM3	EID2
SH3GLB2	EID2B
CEP126	EIF1
CNPY2	EIF1AD
HNRNPA1L2	EIF2A
RNFT1	EIF2AK1
CEP164	EIF2AK3
TNNT1	EIF2AK4
CD37	EIF2B1
TMEM202-AS1	EIF2B5
EFCAB7	EIF2S2
PDZD2	EIF2S3
CTTNBP2	EIF3A
ZBTB37	EIF3D
TSNAXIP1	EIF3E
PDGFRL	EIF3F
KCNJ3	EIF3G
CASTOR3	EIF3H
GTF2IP14	EIF3I
GABARAPL1	EIF3J
KCND1	EIF3L
LCAT	EIF4A2
MACF1	EIF4A3
GSAP	EIF4E2
CSAD	EIF4EBP1
LINC01089	EIF4EBP3
ZNF292	EIF4G1
AF241728.1	EIF4G2
DZIP1L	EIF4G3
AC022364.1	EIF4H
NUTM2D	EIF5
MEIS3P1	EIF5B
BACH1	EIF6
DNM1	ELAC2
GALNT13	ELAVL1
ABCC6	ELF1
CD55	ELFN1-AS1
ACVR2A	ELK1
CECR7	ELK4
SH3D21	ELL
FAM86FP	ELMO2
AP002807.1	ELMO3
MSH3	ELMOD2
LINC00910	ELMOD3
OSBPL9	ELOVL5
LOXL1-AS1	ELP3
WHAMMP3	ELP6
SPEF2	EMC10
ZXDA	EMC3-AS1
AL035661.1	EMC4
CFAP36	EMC7
AC114490.1	EMC8
PI4KAP2	EMD
STAG3L4	EMG1
TMEM234	EML4
ARRDC1-AS1	ENAH
ZMYM5	ENC1
PEAK1	ENDOG
FAM156A	ENDOV
TMEM106B	ENGASE
AC006001.2	ENO1
SPEG	ENOPH1
ELAVL2	ENPP1
GTF2IRD2B	ENPP4
LHFPL2	ENPP5
TMEM17	ENSA
AC226118.1	ENTPD2
ADORA2A-AS1	ENTPD4
DZANK1	ENTPD6
SMPD5	ENY2
SRPK3	EP300
AC020915.2	EP400
TMCO3	EPB41
TES	EPB41L4B
CABP4	EPC1
SPTY2D1OS	EPC2
NAPSB	EPCAM
AP4S1	EPG5
AP1S2	EPHA7
LINC02035	EPHX1
AMH	EPM2AIP1
KIFC3	EPN1
OLFM1	EPN2
AC069224.1	EPOR
TMEM147-AS1	EPPK1
RAB24	EPRS
AC009065.8	EPS15
RPS6KA3	EPS8L2
TMEM266	EPT1
CA11	ERAL1
CBY3	ERBB2
NEIL1	ERBB2IP
AC078846.1	ERC1
IFT57	ERCC3
PLSCR1	ERCC4
LINC01002	ERCC6
ZNF280C	ERGIC1
BCLAF3	ERGIC2
GPCPD1	ERH
CCDC159	ERI2
ESPN	ERI3
CCDC66	ERICH1
CCDC65	ERLIN1
SIX4	ERLIN2
INE1	ERMAP
PASD1	ERO1LB
RNF139-AS1	ERP29
PTBP2	ERRFI1
LAMTOR5-AS1	ESCO1
PSMG3-AS1	ESF1
HIST1H4H	ESRP1
CNTNAP1	ESRP2
DQX1	ESRRA
LMNTD2	ESYT1
STAG3L5P	ETF1
TCTN1	ETFA
AC087752.3	ETNK1
COMMD3	ETV1
WNT9A	ETV6
TUBB6	EVA1C
SLC41A2	EVC
AL513477.1	EVI5L
POU4F1	EVPL
HERC2P2	EWSR1
GRIK2	EXD2
ZNF493	EXOC2
KIF26A	EXOC7
ILDR2	EXOC8
AC242376.2	EXOG
KHDC4	EXOSC10
FAM86B3P	EXOSC2
AL162231.2	EXOSC3
MTBP	EXOSC4
GPC6	EXOSC6
ARHGAP31	EXOSC7
SEC61A2	EXPH5
PRR22	EXT2
GPAT3	EXTL3
NAP1L3	F11R
SMG1P5	F8
AC004803.1	FAAH
AL359504.2	FADD
CD40	FAF2
CKMT2	FAIM
RGMA	FAM102A
ATP8B2	FAM104A
UCHL3	FAM104B
PYROXD1	FAM105A
PIBF1	FAM107B
RASGEF1A	FAM109A
DZIP3	FAM110A
AC245452.1	FAM110B
HIST1H2BE	FAM111A
NRIP2	FAM115A
ZNF629	FAM117B
MT-ND1	FAM118A
AC106791.1	FAM120A
USP25	FAM120AOS
ARID3B	FAM120B
HIST1H4I	FAM122A
RNF32	FAM127A
ARMH1	FAM127B
CROCCP2	FAM129B
FER1L4	FAM134A
COL5A1	FAM134B
MINDY1	FAM134C
PARVA	FAM13A
PPP4R1L	FAM13B
LINC00662	FAM155B
DAPK1	FAM160A1
LIME1	FAM160A2
AC034243.1	FAM160B1
SLC16A1-AS1	FAM160B2
IL11RA	FAM162A
EML5	FAM168A
ULK2	FAM168B
JAKMIP3	FAM173A
MSRB3	FAM174A
FOXD4	FAM174B
BMS1P22	FAM175B
C6orf52	FAM188A
A1BG-AS1	FAM193B
WDR78	FAM199X
LINC00365	FAM200B
WASHC1	FAM208A
ABTB2	FAM208B
LHX4	FAM210B
CRMP1	FAM213B
LRRC37B	FAM214A
RALYL	FAM217B
ABLIM3	FAM219B
GIHCG	FAM222B
POC1B-AS1	FAM231D
PPP3CB-AS1	FAM32A
LNCTAM34A	FAM3A
PARP4	FAM43A
CLMP	FAM47E-STBD1
SMG1P1	FAM50A
SNORC	FAM53C
SYNE3	FAM57A
LINC02449	FAM58A
OR7E128P	FAM69A
AC005332.5	FAM69B
AC138028.4	FAM73B
AC245297.3	FAM83F
AC010969.2	FAM83H
GOLGA2P10	FAM83H-AS1
PARGP1	FAM84B
AL139423.1	FAM89A
AL031587.5	FAM89B
RANGRF	FAM8A1
PLCE1	FAM91A1
CLDN15	FAM98A
USH1C	FAN1
TMEM59L	FANCF
PRKAA2	FANCL
CFAP43	FARP1
GATM	FARSB
CCDC180	FASTK
MTCP1	FASTKD2
AP001476.1	FASTKD5
NBPF11	FAT1
AC025048.2	FAU
AC132812.1	FBRS
AC132872.3	FBXL12
TLCD2	FBXL14
ANKDD1A	FBXL16
CHRM1	FBXL17
AL163540.1	FBXL19
AC131212.3	FBXL3
STAG3L2	FBXL4
MTND4P12	FBXL5
AC102945.2	FBXL8
LINC01238	FBXO10
TTC28	FBXO11
DNAH10	FBXO18
ARHGAP42	FBXO21
RNF213-AS1	FBXO28
FAM157C	FBXO31
MZF1-AS1	FBXO34
LINC00174	FBXO38
VILL	FBXO46
LYG1	FBXO5
MT-TE	FBXO9
GPX3	FBXW11
THBS4	FBXW2
ZNF77	FBXW5
AC010642.2	FDPS
N4BP2	FECH
PRAP1	FEM1A
CECR2	FEM1B
NUP50-DT	FEM1C
PRDM11	FGD5-AS1
C1orf56	FGFRL1
GTF2IRD2	FHDC1
FUT2	FIP1L1
ZSCAN26	FIZ1
AC067750.1	FKBP10
PTPRG	FKBP15
ANKRD20A8P	FKBP3
GLIDR	FKBP8
TFAP2A-AS1	FLAD1
RGL4	FLII
RAD52	FLJ10038
BTN2A3P	FLJ20021
IDNK	FLJ31306
AL358075.2	FLJ37201
MMP25	FLJ37453
ACHE	FLJ44635
ZNF333	FLNA
OLFM2	FLNB
MATN1-AS1	FLT4
NINL	FLYWCH1
LTO1	FMR1
IL18BP	FN1
ADNP-AS1	FN3K
RAB39B	FNBP1L
KRT80	FNDC3A
NLGN3	FNIP1
DUSP8P5	FNIP2
GSTO2	FOCAD
AL390726.4	FOLH1
CCDC9B	FOSL2
EFHD1	FOXA1
WDFY3-AS2	FOXJ3
ZNF33B	FOXK1
ABCA1	FOXK2
AOC2	FOXN3
DNAJC27	FOXN3-AS1
PITPNM3	FOXO3
AL353759.1	FOXP4
HTR2C	FOXRED1
AC008105.1	FPGS
ZNF224	FPGT
AC109347.1	FRAT1
SLC5A1	FRAT2
CCDC122	FRMD4B
ISM2	FRMD8
SPAG5-AS1	FRRS1
MUC20-OT1	FRS2
CBSL	FRYL
SUMO2P17	FTH1
AL390879.1	FTL
RSRP1	FTSJ1
KIAA1211L	FTSJ2
FAM221B	FTSJ3
NFKBIZ	FUBP1
AC012360.3	FUBP3
RDH10	FUCA2
PECR	FUK
AC040162.1	FUNDC2
ATM	FURIN
AC107068.1	FUT1
FMNL1	FUT10
C9orf139	FUT11
DMC1	FUT3
AL135999.1	FUT8
CLK4	FXR1
MIR600HG	FXYD3
AL357033.3	FYCO1
ALDH1A2	FZD5
TIAF1	FZD6
AC109587.1	FZR1
AC112484.3	G3BP1
AC090114.3	G3BP2
POLN	G6PC3
MASP1	GAA
INTS6L	GAB1
C1S	GABARAP
TUBE1	GABARAPL2
CTAGE7P	GABPA
MT-TL1	GABPB1
TRANK1	GABRB3
HAUS7	GADD45G
C2orf42	GALNS
NBPF25P	GALNT1
AL512625.1	GALNT10
L3HYPDH	GALNT11
DRP2	GALNT2
RASSF8-AS1	GALNT3
FAM228B	GALNT4
AC009078.3	GALNT7
AGAP4	GAN
HLA-L	GANAB
TMEM161B-AS1	GARS
COL7A1	GART
AP003733.3	GAS6
CEMIP2	GAS6-AS1
C11orf65	GATA2
AL121753.2	GATAD1
SLC16A8	GATAD2A
LINC02485	GATC
MOSPD1	GBF1
MAFA	GCA
AL162586.1	GCC1
MT-TR	GCFC2
AC110079.1	GCN1L1
TPPP	GCOM1
NPIPB5	GDAP2
SPATA25	GDE1
AC132872.4	GDF1
NFIL3	GDI1
THUMPD3-AS1	GDI2
DLGAP1-AS1	GDPGP1
ZSCAN23	GEMIN5
AC027644.1	GEMIN8
AC008267.2	GEN1
TYMP	GET4
FNDC11	GFM1
LINC00663	GFOD2
AC012485.1	GGA1
HIST2H4B	GGA2
AC018638.4	GGA3
NIBAN1	GGCX
AL591895.1	GGNBP2
AL121672.1	GGPS1
SCOC-AS1	GHITM
ANKRD36C	GID8
LNCOC1	GIGYF2
CALCOCO1	GINM1
PLAG1	GIPC1
CDHR2	GIT1
LCA5	GK5
SNX18P3	GLCE
PLA1A	GLG1
IFT46	GLOD4
AC073896.2	GLT8D1
THORLNC	GLTSCR1L
AC018638.5	GLUL
CAPN12	GLYR1
C1QTNF6	GMEB2
CCDC30	GMFB
GABBR1	GMPPB
AL136309.2	GMPR2
MSS51	GNA11
CLEC2D	GNA12
DARS-AS1	GNA13
ASS1P12	GNAI2
SPATC1	GNAI3
BCAP29	GNAS
LRRC37A2	GNB1
AC010326.3	GNB2
NLRC3	GNB2L1
FLVCR2	GNL1
LY6G5B	GNL2
MIR17HG	GNL3L
MIR3936	GNPAT
ANO9	GNPDA1
TRIM52	GNPDA2
MYADML2	GNPNAT1
ATP4B	GNPTAB
ABCA11P	GNS
PRSS30P	GOLGA3
CCDC150	GOLGA5
JMJD1C	GOLGA7
AL590617.2	GOLM1
UBR4	GOLPH3
SDAD1P1	GOLPH3L
SLC9A9	GOLT1A
RANBP3L	GORASP1
BDNF-AS	GORASP2
CEP85L	GOSR1
AL691432.1	GOSR2
EBF2	GOT1
SLC25A34	GP1BB
AL450384.2	GPAA1
POLR3C	GPAM
PPARG	GPANK1
FAXC	GPATCH2
PFKFB1	GPATCH2L
LRRIQ3	GPATCH8
ZDHHC11	GPBP1
AL928654.2	GPC1
AC018809.2	GPHN
AC005261.3	GPR107
AC010491.1	GPR125
NTSR1	GPR126
BRSK2	GPR157
NKX6-1	GPR158
GOLGA2P5	GPR176
CDH12	GPR19
AL353622.1	GPR56
BVES	GPR75-ASB3
NUDT17	GPR98
SMIM27	GPRC5C
AC018638.2	GPS1
FO681492.1	GPT2
INHBE	GPX4
PLD6	GRAMD4
BAZ2B	GRB10
ASNSP1	GRB2
SLC51A	GRHL2
GLUD1P3	GRIN3A
CFAP300	GRINA
IMPDH1P5	GRIPAP1
AC116666.1	GRPEL2
AC004890.3	GRSF1
LINC01347	GSE1
AP005119.2	GSK3B
AC005520.2	GSKIP
KIF7	GSN
RELN	GSPT1
AL133325.3	GSR
ATP6V1C2	GSTCD
TRAF5	GSTK1
AC084018.1	GSTT1
MIA2	GTF2A1
TEX22	GTF2A2
PRRT4	GTF2B
MT-TN	GTF2E1
FBXO32	GTF2F1
ZNF501	GTF2H1
SEMA3B	GTF2H5
AC018638.8	GTF3C2
CACHD1	GTF3C4
AC097374.1	GTF3C5
DOP1A	GTF3C6
CCT6P3	GTPBP1
CHST2	GTPBP3
NMI	GTPBP4
CCDC136	GUCD1
LINC02846	GUCY1A3
DTX3	GUK1
C14orf39	GULP1
TCF4	GUSB
RGPD8	GXYLT1
GATA3	GYS1
TRIP6	GZF1
CLGN	H1F0
AL121906.2	H1FX
BHLHA15	H2AFJ
TGFBR2	H2AFV
STK32A	H2AFY
AL049840.5	H3F3B
BAGE2	H6PD
AP006621.2	HADHA
ZNF596	HADHB
CICP14	HARBI1
AC022400.6	HAS3
FYN	HAX1
MTUS2	HBP1
AL022311.1	HCFC1
SLC16A4	HDAC1
PFN4	HDAC6
ELN	HDDC3
AL133243.2	HDHD1
GAL3ST4	HDHD2
SH2D3A	HDHD3
ZNF423	HDLBP
GVINP1	HEATR1
GMDS-DT	HEATR2
PHTF1	HEATR6
AL357033.4	HECA
GPNMB	HECTD1
FAR2	HECTD4
ANKRD24	HEG1
DNAH7	HELZ
RNPC3	HERC1
ZC3H12C	HERC2
AL022328.2	HERC3
AC004076.2	HERPUD1
DLSTP1	HERPUD2
MST1P2	HES1
RBM12B-AS1	HES6
AC092821.1	HEXIM1
TTC39A	HGSNAT
SNHG11	HIATL1
RPSAP9	HID1
DOCK3	HIF1A
DCST2	HIGD2A
AL035252.3	HINT1
FMO5	HIP1
LRP5L	HIPK1
C9orf147	HIPK2
SLC4A11	HIRA
NUTM2B	HIRIP3
LINC00482	HIST1H1C
KRTCAP2	HIST1H2AC
TENT5A	HIST1H2AD
AC012358.2	HIST1H2BD
TSPEAR	HIST1H3D
CBLB	HIST1H3H
AC132807.2	HIST2H2BE
LINC02028	HIVEP1
ABCC5	HIVEP2
ADAMTS13	HJURP
TBX2	HK1
CRACR2A	HKR1
CLK1	HLA-C
CELF2-AS1	HLCS
URAHP	HLTF
AC145098.2	HM13
AC007342.7	HMBS
SRCIN1	HMG20A
SUSD5	HMG20B
FAM92A	HMGCR
BEX4	HMGCS1
AC027601.1	HMGN3
EPB41L5	HMGN4
TGFB1I1	HMGXB3
GYG2	HMGXB4
ELF5	HMHA1
CTAGE15	HMMR
ZNF429	HMOX1
ARL17A	HN1
AP000873.2	HN1L
HIST1H4E	HNRNPA0
AC015922.3	HNRNPA2B1
USP3-AS1	HNRNPA3
AC145285.2	HNRNPAB
AC006001.3	HNRNPC
PIGA	HNRNPDL
AC131009.3	HNRNPF
MRPL45P2	HNRNPH1
AL136295.7	HNRNPH2
TMC3	HNRNPH3
KCNIP2	HNRNPK
AC012676.5	HNRNPL
HACD1	HNRNPLL
RSKR	HNRNPM
KCNH2	HNRNPR
AC107884.1	HNRNPU
L3MBTL1	HNRNPUL2
FMNL2	HNRNPUL2-BSCL2
DISP1	HOGA1
AC245060.5	HOMER2
CNKSR3	HOMEZ
FAM189A1	HOOK2
ANKAR	HOOK3
SMIM2-AS1	HOXC13-AS
NMNAT2	HOXC6
LINC01977	HP1BP3
MGAT3	HPN
AC026412.3	HPS4
ANKRD31	HPS6
DNAH10OS	HRAS
ADGRA2	HS2ST1
AL157400.4	HS6ST1
AP000525.1	HSBP1L1
C20orf194	HSD17B11
GVQW3	HSD17B4
CACNA2D1	HSDL1
BBC3	HSF1
ABCC8	HSF2
SEC31B	HSF4
WNK4	HSP90B1
CTNNA3	HSP90B2P
PI4KAP1	HSPA13
AC232271.1	HSPA14
WASH2P	HSPA4
CFAP57	HSPA8
ACSL6	HSPA9
ABTB1	HSPB2-C11orf52
SCN8A	HSPD1
AC016394.2	HSPE1
AL157400.3	HSPE1-MOB4
LINC00623	HTATSF1
AACSP1	HTR7P1
CAPS	HTT
APLF	HUWE1
AC008014.1	HYAL2
LINC02615	IARS
AFAP1L1	IARS2
MRPS17P1	IBA57
PKIA	IBTK
ISCA1P4	ICE1
SCARF1	ICE2
LYPD6B	ICT1
AC073349.2	ID3
C17orf49	IDE
LINC00624	IDH3A
AVIL	IDH3G
AL354822.1	IDS
AC037459.2	IDUA
AC010326.4	IER2
ID1	IER5
PRR26	IER5L
AC074212.1	IFNAR1
CCT6P1	IFNAR2
WASH7P	IFNGR1
CPT1B	IFNGR2
PVRIG	IFRD1
UCN	IFRD2
HOXB9	IFT22
SSBP3-AS1	IFT81
RFTN1	IGBP1
ALOX12B	IGF2R
SERPINF1	IGHMBP2
AC253536.6	IGSF9
PRKN	IKBKB
AC005252.3	IL13RA1
ALMS1-IT1	IL17RC
AC009996.1	ILF2
AP003108.2	ILF3
AP003057.1	ILF3-AS1
PPIL6	ILVBL
KCTD12	IMMT
CYP4F32P	IMP3
BTBD11	IMPACT
AP001992.1	IMPAD1
AL669831.1	IMPDH2
PNISR	INADL
AC136489.1	ING2
LINC01001	ING3
FEZ1	ING5
LRRFIP1P1	INHBB
AP000704.1	INIP
PLXDC1	INO80C
AC080013.1	INPP4A
FGF21	INPP5K
SAGE1	INPPL1
RABL2A	INTS10
HIST2H4A	INTS12
SCAND2P	INTS3
RAD9B	INTS4
MSLN	INTS5
FMO4	INTS7
LRRC37A15P	INTS8
AC112907.3	INTS9
AL137003.2	IP6K1
NPIPB3	IP6K2
FAM227A	IPO13
TPT1-AS1	IPO5
CDX2	IPO7
KIF5A	IPO8
SMG1P7	IPO9
INPP4B	IPW
MAK	IQCE
CCDC191	IQCH-AS1
MTSS1	IQGAP1
AL359711.2	IQSEC1
PCDHGB6	IQUB
SUGT1P4-STRA6LP	IRAK1
AL035446.1	IRAK4
LINC01341	IREB2
CSPG4P10	IRF2
ZNF713	IRF2BP1
Y_RNA	IRF2BP2
ERVK3-1	IRF2BPL
CR392039.3	IRF3
NSMCE1-DT	IRGQ
CCNB3	ISCA2
HOXA13	ISG15
IQCN	IST1
MYH7B	ITFG3
ZNF724	ITGB1
MIS18A-AS1	ITGB3BP
AL592435.1	ITGB5
AL662795.2	ITM2B
AC092747.4	ITPA
LINC00653	ITPK1
SGMS1-AS1	ITPKB
LINC02604	IWS1
CHKB	JADE1
TMEM9B-AS1	JADE3
EFCAB12	JAG2
SLCO4A1-AS1	JAGN1
UPP1	JARID2
FRG1EP	JDP2
AC004923.4	JKAMP
AC110285.2	JMJD4
ZCWPW1	JMJD8
NR4A2	JOSD1
SLC4A9	JRK
AC005261.5	JRKL
AL109615.3	JTB
UBE2Q2P1	JUN
MT-TG	JUNB
SPEF1	JUND
SH2D3C	KANSL1
TULP1	KANSL1L
DNAH5	KANSL2
ZSCAN30	KANSL3
TRO	KARS
DCST1	KAT5
MAP3K12	KAT6A
TRIM73	KAT6B
POU3F2	KBTBD4
AL731684.1	KBTBD6
MAATS1	KBTBD7
STX16-NPEPL1	KCMF1
AKAP3	KCNH8
AC073957.3	KCNJ14
SLC12A4	KCNK1
TRPM5	KCNN2
CD99P1	KCTD1
AC007485.2	KCTD15
REEP2	KCTD2
CFAP44	KCTD20
GTF2IP13	KCTD3
PSORS1C3	KCTD5
KCNQ1OT1	KCTD6
DRD4	KDELR2
KIAA1614	KDF1
TTYH1	KDM1B
AL022341.1	KDM2A
CFL1P1	KDM2B
PLXNC1	KDM3B
AP000648.4	KDM4A
SNX22	KDM4C
ROCK1P1	KDM5B
AC024405.2	KDM5C
HECW2	KDM6A
SNCB	KDM6B
DYNC2H1	KEAP1
RWDD3	KHDRBS1
CCDC153	KHSRP
TMEM44	KIAA0100
[truncated: 3,045 more rows]
